# Supplementary material for: RUNX1A isoform is overexpressed in acute myeloid leukemia and is associated with FLT3 internal tandem duplications
Source: Research Square preprint supplement (doi:10.21203/rs.3.rs-5733882/v1), 2025-01-01
Supplement: Supplementary file 1 [file 4bccd2557c15a0d9fc6e9927.xlsx]

## Sheet: DEGs
Column1	Column2	Column3	Column4	Column5	Column6	Column7	Column8	Column9	Column10	Column11	Column12	Column13	Column14	Column15
	baseMean	log2FoldChange	lfcSE	stat	pvalue	padj	genename	biotype	txName	canonicalTX	entrezid	goterm	ontologyAll	description
ENSG00000260289	749.751173399629	10.3897930776318	1.88589561581921	5.50920898828146	3.60449759748171e-08	1.5145595951465e-05		lncRNA	ENST00000567103	ENST00000670665	NA	NA	NA	novel transcript
ENSG00000074047	876.050328447192	8.48412831857515	1.76334835633519	4.8113739341941	1.49896270155626e-06	0.000202113866356109	GLI2	protein_coding	ENST00000482119	ENST00000361492	2736	GO:0000122	BP	GLI family zinc finger 2 [Source:HGNC Symbol;Acc:HGNC:4318]
ENSG00000241479	73.0912820183121	7.75940837050666	2.46794364818188	3.14407842181606	0.00166610783676161	0.0222179128690684	MECOM-AS1	lncRNA	ENST00000480669	ENST00000480669	105374205	NA	NA	MECOM antisense RNA 1 [Source:HGNC Symbol;Acc:HGNC:40368]
ENSG00000248991	44.2531839731849	7.55824662215767	2.43784167794181	3.10038452888329	0.00193269555076029	0.0243599185288713		lncRNA	ENST00000507949	ENST00000685877	105377488	NA	NA	novel transcript
ENSG00000145506	35.3724714212629	7.2419981993951	1.37388525612517	5.27118124829438	1.35548530290163e-07	4.25928842657855e-05	NKD2	protein_coding	ENST00000296849	ENST00000296849	85409	GO:0005509	MF	NKD inhibitor of WNT signaling pathway 2 [Source:HGNC Symbol;Acc:HGNC:17046]
ENSG00000271776	67.3206671536854	7.11350734130394	2.2511286020006	3.15997377270322	0.00157783341417687	0.0214348076145472		lncRNA	ENST00000607269	ENST00000607269	780529	NA	NA	novel transcript, antisense to POU4F1
ENSG00000269945	11.3816037949465	6.76526910362912	1.73720870484947	3.89433295190363	9.84693219644933e-05	0.00356702372199259		lncRNA	ENST00000602396	ENST00000602396	NA	NA	NA	novel transcript
ENSG00000152192	246.87977323313	6.71828265759633	1.91501778335817	3.50820901820305	0.000451134451250381	0.00961214300140553	POU4F1	protein_coding	ENST00000377208	ENST00000377208	5457	GO:0000122	BP	POU class 4 homeobox 1 [Source:HGNC Symbol;Acc:HGNC:9218]
ENSG00000173452	114.524241803174	6.65331792799635	1.23760970798658	5.37594193473189	7.61833425309509e-08	2.78076895525095e-05	TMEM196	protein_coding	ENST00000405844	ENST00000405844	256130	GO:0005737	BP	transmembrane protein 196 [Source:HGNC Symbol;Acc:HGNC:22431]
ENSG00000258517	22.7951362820607	6.59975454277857	1.62086793372715	4.07174107492064	4.66630336862375e-05	0.00219845552188511		lncRNA	ENST00000553621	ENST00000553621	NA	NA	NA	novel transcript
ENSG00000249818	15.120681967166	6.58868449793599	2.53171755139274	2.60245638156257	0.00925585883928691	0.0644078018518143		lncRNA	ENST00000510416	ENST00000510416	102724700	NA	NA	novel transcript
ENSG00000228014	25.426862401673	6.16640315239086	1.20837764434241	5.10304306047187	3.3423491305705e-07	7.84280053131791e-05	ZNF680P1	processed_pseudogene	ENST00000436625	ENST00000436625	NA	NA	NA	ZNF680 pseudogene 1 [Source:HGNC Symbol;Acc:HGNC:50379]
ENSG00000242795	56.1777625077793	6.0702005687377	2.44869926134052	2.47894899327679	0.0131770148241916	0.0805965822083593		lncRNA	ENST00000469794	ENST00000469794	NA	NA	NA	novel transcript
ENSG00000251248	22.6821039948904	6.02383622471852	1.19196307896466	5.05371041353968	4.33308449985129e-07	9.05088679113447e-05		lncRNA	ENST00000514766	ENST00000514766	NA	NA	NA	novel transcript
ENSG00000233774	10.0106485245265	5.99300638833159	1.63691547939316	3.66115811340078	0.000251077743118666	0.00671075837672788	MED14P1	unprocessed_pseudogene	ENST00000430517	ENST00000430517	NA	NA	NA	mediator complex subunit 14 pseudogene 1 [Source:HGNC Symbol;Acc:HGNC:2371]
ENSG00000272235	37.1366986308243	5.90179768401237	2.04130562156056	2.89118768972012	0.00383788837332728	0.0369829158022813		lncRNA	ENST00000607061	ENST00000607061	NA	NA	NA	novel transcript
ENSG00000287828	107.976140498859	5.8493344954253	1.41358563274699	4.13794138814102	3.50435857657544e-05	0.00181683646374649		lncRNA	ENST00000669140	ENST00000669140	NA	NA	NA	novel transcript, antisense to PRDM16
ENSG00000284500	8.90344708722391	5.81777968046416	1.75106328043476	3.32242686227747	0.000892380621221917	0.0147584856144223		lncRNA	ENST00000640932	ENST00000640881	NA	NA	NA	novel transcript
ENSG00000286046	180.856459778404	5.80175158698923	1.42316862927934	4.07664381270624	4.56904009319285e-05	0.00217245832641601		lncRNA	ENST00000652661	ENST00000652661	NA	NA	NA	novel transcript
ENSG00000254089	8.44177329516226	5.75230080936497	1.39025191522438	4.13759603304454	3.50963573151422e-05	0.00181696557011458		lncRNA	ENST00000522598	ENST00000522598	NA	NA	NA	novel transcript
ENSG00000204099	323.414601543438	5.68616695646568	0.938626823829977	6.0579634121938	1.37855740711574e-09	1.79774617762112e-06	NEU4	protein_coding	ENST00000415936	ENST00000407683	129807	GO:0004308	CC	neuraminidase 4 [Source:HGNC Symbol;Acc:HGNC:21328]
ENSG00000229781	32.76627016046	5.67641231645911	1.2567123289657	4.51687485323781	6.2758970492055e-06	0.000557213306560418	RRN3P4	processed_pseudogene	ENST00000428909	ENST00000428909	NA	NA	NA	RRN3 pseudogene 4 [Source:HGNC Symbol;Acc:HGNC:54536]
ENSG00000224400	3180.93476616885	5.65368360480608	1.10171464408935	5.13171322096681	2.87116727504816e-07	7.05799324157417e-05		lncRNA	ENST00000425176	ENST00000425176	NA	NA	NA	novel transcript
ENSG00000267337	443.51810973616	5.62989335344784	0.990405000387776	5.68443550996164	1.31245435404052e-08	7.98301102264677e-06	LINC01478	lncRNA	ENST00000587877	ENST00000657927	101927921	NA	NA	long intergenic non-protein coding RNA 1478 [Source:HGNC Symbol;Acc:HGNC:51121]
ENSG00000285549	15.1750009813722	5.60187480391459	1.77269311421905	3.16009283218911	0.00157718878067252	0.0214341082280489		lncRNA	ENST00000647982	ENST00000647982	NA	NA	NA	Novel transcript
ENSG00000215023	7.21459340496201	5.51210800704305	1.68034233017883	3.28034824097803	0.00103679026186277	0.0162469440167706		lncRNA	ENST00000437438	ENST00000437438	NA	NA	NA	novel transcript
ENSG00000286423	240.288082445247	5.49312047980001	1.11381386921837	4.93181188671576	8.14703565552104e-07	0.000134688500535112		lncRNA	ENST00000663930	ENST00000663930	NA	NA	NA	novel transcript
ENSG00000168143	13.8374338634877	5.4740162146813	1.4919557511652	3.66902048563181	0.000243481570374147	0.00653673850448751	FAM83B	protein_coding	ENST00000306858	ENST00000306858	222584	GO:0005154	MF	family with sequence similarity 83 member B [Source:HGNC Symbol;Acc:HGNC:21357]
ENSG00000251654	4.63221467023606	5.46325219181916	1.66827606856066	3.27478904407753	0.00105740903594202	0.0164275721938095		lncRNA	ENST00000505040	ENST00000505040	NA	NA	NA	novel transcript
ENSG00000228131	15.1199956788717	5.4540083197041	1.21489148871967	4.48929667410204	7.14587178163278e-06	0.00061401774340383	IGHD6-6	IG_D_gene	ENST00000454691	ENST00000454691	NA	NA	NA	immunoglobulin heavy diversity 6-6 [Source:HGNC Symbol;Acc:HGNC:5517]
ENSG00000234223	4.14996735169577	5.32532831913176	1.32537517002794	4.01797803335904	5.86996677249157e-05	0.00253728611591813		lncRNA	ENST00000447198	ENST00000447198	NA	NA	NA	novel transcript
ENSG00000224957	167.577393793837	5.31377041989693	1.19391403509726	4.45071442640682	8.55850896673293e-06	0.000688797951050915	LINC01266	lncRNA	ENST00000420823	ENST00000661103	101927215	NA	NA	long intergenic non-protein coding RNA 1266 [Source:HGNC Symbol;Acc:HGNC:50309]
ENSG00000264985	12.3634000575823	5.29461442228676	1.3459197020525	3.93382637479233	8.36041851243153e-05	0.00322081112329665		lncRNA	ENST00000650299	ENST00000583712	101928251	NA	NA	novel transcript, antisense to SDK2
ENSG00000270182	4.01318342385868	5.26895696568231	1.56193270724616	3.37335721394297	0.000742575487209036	0.013064122592885		lncRNA	ENST00000602610	ENST00000602610	NA	NA	NA	novel transcript
ENSG00000271201	3.98014633635661	5.25606807633307	1.86435694118532	2.81923914901798	0.00481376387349096	0.0425826612808982		lncRNA	ENST00000605005	ENST00000605005	NA	NA	NA	novel transcript
ENSG00000273677	3.92809052042623	5.23694202623614	1.9899740196063	2.63166351652783	0.00849679685157044	0.0612939998400488		misc_RNA	ENST00000613208	ENST00000613208	NA	NA	NA	NULL
ENSG00000286518	37.2833325970797	5.23432317478717	1.55517096831283	3.36575417200963	0.000763347042195926	0.0133257530032811		lncRNA	ENST00000665088	ENST00000665088	NA	NA	NA	novel transcript, antisense to PRDM16
ENSG00000261161	5.91003767147224	5.21891670115756	1.94602919968686	2.68182856762752	0.00732209713889214	0.0560693583833453		lncRNA	ENST00000565822	ENST00000565822	NA	NA	NA	novel transcript
ENSG00000226839	3.77714506726543	5.17546789487178	1.61381841789692	3.20697039857575	0.00134140797990167	0.019366008294737	MTND6P11	processed_pseudogene	ENST00000431890	ENST00000431890	NA	NA	NA	MT-ND6 pseudogene 11 [Source:HGNC Symbol;Acc:HGNC:39474]
ENSG00000204610	16.5655702076358	5.15301827522976	1.68233690555416	3.06301208647168	0.00219121209477191	0.0261942270833831	TRIM15	protein_coding	ENST00000619857	ENST00000376694	89870	GO:0003713	BP	tripartite motif containing 15 [Source:HGNC Symbol;Acc:HGNC:16284]
ENSG00000265894	5.49897084895701	5.13733948153432	1.24977788595773	4.11060200316912	3.94628900293911e-05	0.00196965606920176	RN7SL357P	misc_RNA	ENST00000581065	ENST00000581065	NA	NA	NA	RNA, 7SL, cytoplasmic 357, pseudogene [Source:HGNC Symbol;Acc:HGNC:46373]
ENSG00000237921	8.25269594989324	5.13090399725078	1.51197429580714	3.39351271478577	0.000690023551694213	0.0125742264568946		lncRNA	ENST00000418764	ENST00000418764	NA	NA	NA	novel transcript
ENSG00000286850	5.34833748428083	5.09157606408001	1.47785417114451	3.44524931044915	0.000570532907691607	0.0111064370830425		lncRNA	ENST00000660617	ENST00000660617	NA	NA	NA	novel transcript
ENSG00000261327	54.9319418224575	5.09029949816872	1.4650038050174	3.474598141476	0.000511619173087272	0.0104245516126054		lncRNA	ENST00000568031	ENST00000661363	NA	NA	NA	novel transcript
ENSG00000183242	290.163353866779	5.05100170989074	1.25911273833334	4.01155635719852	6.03197731994947e-05	0.00257954476252892	WT1-AS	lncRNA	ENST00000494911	ENST00000690579	NA	GO:0003674	MF	WT1 antisense RNA [Source:HGNC Symbol;Acc:HGNC:18135]
ENSG00000232444	18.3323520761384	5.03831358873493	1.17924358002906	4.2724960933099	1.93296941210466e-05	0.00119605792253106		lncRNA	ENST00000420130	ENST00000420130	NA	NA	NA	novel transcript
ENSG00000107447	1075.61293718709	5.00289835130414	1.07888170384642	4.63711483239346	3.53306148676808e-06	0.000364773456816719	DNTT	protein_coding	ENST00000371174	ENST00000371174	1791	GO:0000791	CC	DNA nucleotidylexotransferase [Source:HGNC Symbol;Acc:HGNC:2983]
ENSG00000287653	3.33272537376419	5.00046921473464	1.77297081930133	2.82039002576769	0.00479653113113984	0.042494805295526		lncRNA	ENST00000653889	ENST00000653889	NA	NA	NA	novel transcript
ENSG00000286627	7.57575402528749	4.99709581684341	1.51396194112198	3.30067466104209	0.000964526570103032	0.0155460000612146		lncRNA	ENST00000668117	ENST00000668117	NA	NA	NA	novel transcript, antisense to PTPRM
ENSG00000236240	22.1078981753012	4.98893674743376	1.68711148708309	2.95708777139519	0.00310559701251748	0.0324815784788225	GPC5-IT1	lncRNA	ENST00000416664	ENST00000416664	NA	NA	NA	GPC5 intronic transcript 1 [Source:HGNC Symbol;Acc:HGNC:41340]
ENSG00000232392	3.35578106645037	4.98850043380462	1.65028298166717	3.02281517122905	0.00250435149332241	0.0285097895272803	GOT2P7	processed_pseudogene	ENST00000446186	ENST00000446186	NA	NA	NA	GOT2 pseudogene 7 [Source:HGNC Symbol;Acc:HGNC:54892]
ENSG00000290010	48.7223716327403	4.97921079780201	1.18415277471517	4.20487195919436	2.61230000540927e-05	0.00147138390154732		lncRNA	ENST00000702457	ENST00000702457	NA	NA	NA	novel transcript
ENSG00000285550	41.1327253079911	4.96964921052163	1.03547012613195	4.79941341145784	1.59131015768117e-06	0.00021063583830757		lncRNA	ENST00000649259	ENST00000649259	NA	NA	NA	novel transcript
ENSG00000287092	12460.5478098321	4.95760429081077	0.833922355617301	5.94492311834112	2.76586639988899e-09	2.79975634081015e-06		lncRNA	ENST00000663591	ENST00000663591	NA	NA	NA	novel transcript
ENSG00000108947	3.15521923938061	4.92045287964664	1.46309538966026	3.36304311695576	0.000770883225380459	0.0134168043404691	EFNB3	protein_coding	ENST00000226091	ENST00000226091	1949	GO:0001618	BP	ephrin B3 [Source:HGNC Symbol;Acc:HGNC:3228]
ENSG00000221059	7.12403325426619	4.91963784115566	1.32854012112137	3.70304047498633	0.000213030878437108	0.00599072671066408	RNU6ATAC6P	snRNA	ENST00000408132	ENST00000408132	NA	NA	NA	RNA, U6atac small nuclear 6, pseudogene [Source:HGNC Symbol;Acc:HGNC:46905]
ENSG00000154252	67.9579064205791	4.91589193362398	0.846123913092983	5.80989599461156	6.25116649468304e-09	4.70608650941388e-06	GAL3ST2	protein_coding	ENST00000192314	ENST00000192314	64090	GO:0001733	MF	galactose-3-O-sulfotransferase 2 [Source:HGNC Symbol;Acc:HGNC:24869]
ENSG00000224272	32.6636573562465	4.90190123456822	0.986591086217901	4.96852374103608	6.74645414919166e-07	0.000119672880981729		lncRNA	ENST00000413820	ENST00000413820	124905349	NA	NA	novel transcript
ENSG00000276476	1597.81521299307	4.90093291332271	1.26634589023699	3.87013765441726	0.00010877391739563	0.00379040914079892	LINC00540	lncRNA	ENST00000631321	ENST00000631321	100506622	NA	NA	long intergenic non-protein coding RNA 540 [Source:NCBI gene (formerly Entrezgene);Acc:100506622]
ENSG00000221456	3.06872281071059	4.89663778026055	1.47314992496811	3.3239235852838	0.000887605133374862	0.0147198251948756	MIR1202	miRNA	ENST00000408529	ENST00000408529	100302259	NA	NA	microRNA 1202 [Source:HGNC Symbol;Acc:HGNC:35268]
ENSG00000166450	134.90662564128	4.89177210135064	1.2882032045401	3.79736060592788	0.000146244966434756	0.00461546559570858	PRTG	protein_coding	ENST00000389286	ENST00000389286	283659	GO:0005615	MF	protogenin [Source:HGNC Symbol;Acc:HGNC:26373]
ENSG00000135750	39.5516545614545	4.87467491269946	1.27843661623299	3.81299694549037	0.000137291809983991	0.00442567069186576	KCNK1	protein_coding	ENST00000366621	ENST00000366621	3775	GO:0005242	MF	potassium two pore domain channel subfamily K member 1 [Source:HGNC Symbol;Acc:HGNC:6272]
ENSG00000286475	71.010263741576	4.86563567155863	1.37717328021443	3.53305988539149	0.000410779411470095	0.00906776103413765		lncRNA	ENST00000666628	ENST00000666628	NA	NA	NA	novel transcript
ENSG00000273908	13.1840322985473	4.86316891855871	1.47274872555164	3.30210363396318	0.000959626078309196	0.0155015860374524		misc_RNA	ENST00000426618	ENST00000426618	NA	NA	NA	NULL
ENSG00000226286	6.90368097433532	4.85236608446869	1.89726482373851	2.55755866221523	0.0105409777325158	0.0698683597459746		lncRNA	ENST00000440516	ENST00000440516	NA	NA	NA	novel transcript
ENSG00000232885	40.3194373486882	4.84816014730748	1.45462094370306	3.3329371258504	0.000859343598700354	0.0144102066388399	GPC5-AS2	lncRNA	ENST00000417589	ENST00000656007	NA	NA	NA	GPC5 antisense RNA 2 [Source:HGNC Symbol;Acc:HGNC:39887]
ENSG00000235890	18.9239718467686	4.84801421006238	1.74747915802887	2.77429014691704	0.00553223132497277	0.0466899362639571	TSPEAR-AS1	lncRNA	ENST00000451035	ENST00000451035	NA	NA	NA	TSPEAR antisense RNA 1 [Source:HGNC Symbol;Acc:HGNC:1271]
ENSG00000289580	13.7681097741682	4.82429419188918	1.14171617721905	4.22547590035908	2.38436342606898e-05	0.001387461461585		lncRNA	ENST00000685016	ENST00000685016	NA	NA	NA	novel transcript, antisense to HTR7
ENSG00000246985	470.012395801037	4.81574739459098	0.946564614931242	5.08760555658506	3.62612567610395e-07	8.39959470715976e-05	SOCS2-AS1	lncRNA	ENST00000668485	ENST00000500986	144481	NA	NA	SOCS2 antisense RNA 1 [Source:HGNC Symbol;Acc:HGNC:27054]
ENSG00000281347	4.36957256435462	4.77023843820945	1.7914325250173	2.66280664864192	0.0077491926881155	0.0581376721305034	NF1P9	transcribed_unprocessed_pseudogene	ENST00000629326	ENST00000629326	NA	NA	NA	neurofibromin 1 pseudogene 9 [Source:HGNC Symbol;Acc:HGNC:51736]
ENSG00000260162	11.3194180621124	4.76865544059959	1.78121074774956	2.67719889217178	0.00742405496932771	0.056431562972576		lncRNA	ENST00000563521	ENST00000563521	NA	NA	NA	novel transcript
ENSG00000285472	9.38799990268289	4.75618076347803	1.55096530310407	3.06659391667829	0.00216512779493886	0.0260039592852927	OR4M2-OT1	protein_coding	ENST00000639059	ENST00000639059	NA	NA	NA	OR4M2 overlapping transcript 1 [Source:HGNC Symbol;Acc:HGNC:56199]
ENSG00000253217	22.2401023927134	4.75306293698485	1.45596761906003	3.26453890509833	0.0010964240426707	0.0168551350563855		lncRNA	ENST00000519566	ENST00000519566	NA	NA	NA	novel transcript
ENSG00000260455	63.2418998061899	4.74382856652816	0.806705273924926	5.88049777268424	4.09034512182091e-09	3.4374118912121e-06	NBAT1	lncRNA	ENST00000566912	ENST00000566912	NA	NA	NA	neuroblastoma associated transcript 1 [Source:HGNC Symbol;Acc:HGNC:49075]
ENSG00000267327	4.18811530240787	4.7187933392285	1.88672981297679	2.50104350224021	0.0123827966913288	0.0776174746292901		lncRNA	ENST00000589440	ENST00000589440	NA	NA	NA	novel transcript
ENSG00000086696	39.8576827875586	4.7043308720685	1.09717559745049	4.28767362580791	1.80554117696633e-05	0.00113880169111075	HSD17B2	protein_coding	ENST00000563491	ENST00000199936	3294	GO:0001701	BP	hydroxysteroid 17-beta dehydrogenase 2 [Source:HGNC Symbol;Acc:HGNC:5211]
ENSG00000260161	2.6842100171865	4.70058845397155	1.38427583297841	3.39570217292442	0.000684527992937474	0.0125373053992846	MTCYBP28	processed_pseudogene	ENST00000566728	ENST00000566728	NA	NA	NA	MT-CYB pseudogene 28 [Source:HGNC Symbol;Acc:HGNC:51994]
ENSG00000168333	4.08389527283149	4.68054597837488	1.93861550774902	2.41437559932118	0.0157622044397167	0.0902895751138511	PPDPFL	protein_coding	ENST00000517663	ENST00000522267	492307	GO:0030154	BP	pancreatic progenitor cell differentiation and proliferation factor like [Source:HGNC Symbol;Acc:HGNC:31745]
ENSG00000197430	33.7628468844634	4.65007463671215	1.27268380091903	3.65375487089115	0.000258433007331221	0.00684156421459414	OPALIN	protein_coding	ENST00000371172	ENST00000371172	93377	GO:0005794	CC	oligodendrocytic myelin paranodal and inner loop protein [Source:HGNC Symbol;Acc:HGNC:20707]
ENSG00000223829	8.82852970764348	4.64840997794112	1.42658947873899	3.25840758481551	0.00112039361641269	0.0171447560460401		lncRNA	ENST00000445615	ENST00000423781	NA	NA	NA	novel transcript
ENSG00000114923	100.169431177872	4.6448774694358	0.828222876477621	5.60824580116667	2.04387613653135e-08	1.07039866767676e-05	SLC4A3	protein_coding	ENST00000373760	ENST00000358055	6508	GO:0005452	BP	solute carrier family 4 member 3 [Source:HGNC Symbol;Acc:HGNC:11029]
ENSG00000258592	14.5760529610853	4.64197900793488	1.37081821916493	3.38628342039594	0.000708461736118057	0.0127306933753278		lncRNA	ENST00000554160	ENST00000551408	NA	NA	NA	novel transcript
ENSG00000237197	5.901500113608	4.63868657457936	1.37544123640564	3.3725080009244	0.000744869222986202	0.0130853642400726	IGHD1-7	IG_D_gene	ENST00000430425	ENST00000430425	NA	NA	NA	immunoglobulin heavy diversity 1-7 [Source:HGNC Symbol;Acc:HGNC:5486]
ENSG00000254670	3.90410621732427	4.6185668676885	1.64188943165792	2.81295852122323	0.00490879827386908	0.043180217727491	RASSF10-DT	lncRNA	ENST00000533002	ENST00000533002	NA	NA	NA	RASSF10 divergent transcript [Source:HGNC Symbol;Acc:HGNC:54255]
ENSG00000206579	12.9361297750042	4.60693286598772	1.09663659510026	4.20096583186387	2.65778704840455e-05	0.00149133218604265	XKR4	protein_coding	ENST00000327381	ENST00000327381	114786	GO:0005886	CC	XK related 4 [Source:HGNC Symbol;Acc:HGNC:29394]
ENSG00000211923	28.4727835872994	4.60030371841561	0.724463770005537	6.34994310119945	2.15394580678801e-10	4.86468660463073e-07	IGHD3-10	IG_D_gene	ENST00000390583	ENST00000390583	NA	NA	NA	immunoglobulin heavy diversity 3-10 [Source:HGNC Symbol;Acc:HGNC:5495]
ENSG00000279839	16.4025304005558	4.59502414866049	1.56784620260925	2.93078756131395	0.00338103907495153	0.0341250349417967		TEC	ENST00000624175	ENST00000624175	NA	NA	NA	TEC
ENSG00000269895	8.07059239590423	4.58153047545517	1.15749003585416	3.95815975389739	7.55294362097217e-05	0.00297961976733025		lncRNA	ENST00000602510	ENST00000602510	NA	NA	NA	novel transcript
ENSG00000228769	8.23470575142547	4.57069510546649	1.25350511571323	3.64633143349066	0.000266010837687777	0.00695421104661752	ABCF2P2	unprocessed_pseudogene	ENST00000450549	ENST00000450549	NA	NA	NA	ATP binding cassette subfamily F member 2 pseudogene 2 [Source:HGNC Symbol;Acc:HGNC:48842]
ENSG00000235984	8.46371354011493	4.5572062952143	1.69857817700457	2.68295351777738	0.00729751322988645	0.0559641209836962	GPC5-AS1	lncRNA	ENST00000451897	ENST00000419288	100873969	NA	NA	GPC5 antisense RNA 1 [Source:HGNC Symbol;Acc:HGNC:39886]
ENSG00000249806	875.699710447221	4.55149571144834	0.784652883536762	5.80064867783679	6.60588728673801e-09	4.8716396529299e-06		lncRNA	ENST00000509497	ENST00000509497	NA	NA	NA	novel transcript
ENSG00000226194	3.70282255880862	4.54980874571643	1.29758901356709	3.50635578611208	0.000454287537737306	0.0096452023875883	LINC02519	lncRNA	ENST00000433388	ENST00000433388	NA	NA	NA	long intergenic non-protein coding RNA 2519 [Source:HGNC Symbol;Acc:HGNC:53510]
ENSG00000249332	60.191222531424	4.51666498657339	1.17987762979365	3.82807917746803	0.000129147214216009	0.00423874998447748	LINC02149	lncRNA	ENST00000651224	ENST00000651224	NA	NA	NA	long intergenic non-protein coding RNA 2149 [Source:HGNC Symbol;Acc:HGNC:53010]
ENSG00000289364	1500.27703249965	4.5033108249611	1.00760656105353	4.46931470975391	7.84706023466455e-06	0.000649260755805946		lncRNA	ENST00000689924	ENST00000690331	NA	NA	NA	novel transcript
ENSG00000290955	101.622522875375	4.49613071030457	1.24271082796832	3.6180023615431	0.000296885688247038	0.00742440223563665		lncRNA	ENST00000696486	ENST00000696486	NA	NA	NA	novel transcript
ENSG00000222012	15.1238011046903	4.48666903823311	1.3598653564905	3.29934799560757	0.000969096947897965	0.0155918465312738		lncRNA	ENST00000409610	ENST00000409610	105375614	NA	NA	novel transcript, antisense to PTPRN2
ENSG00000253771	3.54724543541476	4.48386782000977	1.66064390937026	2.70007784011331	0.00693232544305906	0.054151861697013	TPTE2P1	transcribed_unprocessed_pseudogene	ENST00000435256	ENST00000435256	NA	NA	NA	transmembrane phosphoinositide 3-phosphatase and tensin homolog 2 pseudogene 1 [Source:HGNC Symbol;Acc:HGNC:35196]
ENSG00000248642	3.49777761480431	4.44056774328909	1.39494995007595	3.18331689466517	0.00145598169196642	0.0204880663632782	OR10J2P	unprocessed_pseudogene	ENST00000514684	ENST00000514684	NA	NA	NA	olfactory receptor family 10 subfamily J member 2 pseudogene [Source:HGNC Symbol;Acc:HGNC:14991]
ENSG00000280709	14.824477027615	4.4390097288485	1.23922666720698	3.58208053967505	0.000340868661775349	0.00807184139050721	LINC02203	protein_coding	ENST00000625989	ENST00000628444	727924	NA	NA	long intergenic non-protein coding RNA 2203 [Source:HGNC Symbol;Acc:HGNC:53069]
ENSG00000277119	10.1991563945819	4.42434490794725	1.64451740939495	2.69036063873295	0.00713748394292472	0.0551246739944529		misc_RNA	ENST00000615200	ENST00000615200	NA	NA	NA	NULL
ENSG00000287150	108.516625581025	4.41260929084781	1.15597502062376	3.81721854894994	0.000134964610856746	0.00437014442465893		lncRNA	ENST00000653640	ENST00000653640	NA	NA	NA	novel transcript
ENSG00000278822	9.6965391511396	4.41055711944315	1.75414004430058	2.51437000926671	0.0119245253141565	0.0756636780952344		misc_RNA	ENST00000619639	ENST00000619639	NA	NA	NA	NULL
ENSG00000188916	658.377784455954	4.40463254701409	0.933430622617992	4.71875728124327	2.37289730451066e-06	0.000281522514853191	INSYN2A	protein_coding	ENST00000522781	ENST00000522781	642938	GO:0005515	BP	inhibitory synaptic factor 2A [Source:HGNC Symbol;Acc:HGNC:33859]
ENSG00000160963	45.7970552642931	4.3891463431181	0.90463846606752	4.85182369283699	1.223313498602e-06	0.00017611815372702	COL26A1	protein_coding	ENST00000313669	ENST00000313669	136227	GO:0005576	CC	collagen type XXVI alpha 1 chain [Source:HGNC Symbol;Acc:HGNC:18038]
ENSG00000258573	9.1809083852102	4.37165268516496	1.50332379552687	2.90799141088087	0.00363758328314399	0.0357097825372701	RNASE11-AS1	lncRNA	ENST00000554006	ENST00000671014	254028	NA	NA	RNASE11 and RNASE12 antisense RNA 1 [Source:HGNC Symbol;Acc:HGNC:27381]
ENSG00000286766	3.28419278215725	4.36500504220089	1.44213382299027	3.02676837101707	0.00247183290326988	0.0283246747948459		lncRNA	ENST00000657188	ENST00000657188	NA	NA	NA	novel transcript
ENSG00000142611	3049.48089374987	4.3637237522703	1.19171932351149	3.66170428403584	0.000250542962654994	0.00670142153849065	PRDM16	protein_coding	ENST00000511072	ENST00000270722	63976	GO:0000122	BP	PR/SET domain 16 [Source:HGNC Symbol;Acc:HGNC:14000]
ENSG00000229297	3.2220678311493	4.36279245162737	1.43464094133578	3.04103439817159	0.00235766894099137	0.0275539213621165		lncRNA	ENST00000430534	ENST00000430534	NA	NA	NA	novel transcript
ENSG00000272472	3.32462603306512	4.35529438502132	1.69871824780895	2.56387096014238	0.010351202048739	0.0691226239086358		lncRNA	ENST00000606756	ENST00000606756	NA	NA	NA	novel transcript
ENSG00000262869	3.24175478954233	4.35318552217806	1.2646400059905	3.44223296871629	0.0005769331527194	0.0111905831490436		lncRNA	ENST00000574483	ENST00000574483	NA	NA	NA	novel transcript, sense intronic to RTN4RL1
ENSG00000211915	9.55233536596371	4.35084745472748	1.07499406003567	4.04732232156065	5.18068799013501e-05	0.00233428106248776	IGHD5-18	IG_D_gene	ENST00000390575	ENST00000390575	NA	NA	NA	immunoglobulin heavy diversity 5-18 [Source:HGNC Symbol;Acc:HGNC:5509]
ENSG00000278909	7.08889597201103	4.3493094902063	1.29045518237942	3.3703684944616	0.000750677262913977	0.0131554188034236		TEC	ENST00000623140	ENST00000623140	NA	NA	NA	novel transcript
ENSG00000116031	4.96689315904709	4.34899941642864	1.26871633082764	3.42787375771509	0.000608328274328106	0.0115515241834579	CD207	protein_coding	ENST00000410009	ENST00000410009	50489	GO:0005515	MF	CD207 molecule [Source:HGNC Symbol;Acc:HGNC:17935]
ENSG00000207286	3.28373165330226	4.3480381996143	1.29429373931164	3.35939058310425	0.000781145776200516	0.0135284540491303	Y_RNA	misc_RNA	ENST00000384556	ENST00000384556	NA	NA	NA	Y RNA [Source:RFAM;Acc:RF00019]
ENSG00000206172	50.5707385849476	4.340155915966	1.11403260964599	3.89589665364032	9.78361026032952e-05	0.00355674587894635	HBA1	protein_coding	ENST00000320868	ENST00000320868	3039	GO:0004601	BP	hemoglobin subunit alpha 1 [Source:HGNC Symbol;Acc:HGNC:4823]
ENSG00000267568	12.1866207705937	4.33421283608496	1.41195227377797	3.06965958876773	0.00214302877723516	0.0258652264175584		lncRNA	ENST00000585902	ENST00000564292	105371899	NA	NA	novel transcript
ENSG00000228876	272.212515944503	4.33242869139885	0.994999569356664	4.35420157437863	1.3355277655782e-05	0.000895373494191721		lncRNA	ENST00000420404	ENST00000420404	NA	NA	NA	novel transcript
ENSG00000282122	17.3865827413053	4.32767336380737	1.55134852446631	2.78962031777878	0.00527698851237972	0.045315888042622	IGHV7-4-1	IG_V_gene	ENST00000631943	ENST00000631943	NA	GO:0003823	BP	immunoglobulin heavy variable 7-4-1 [Source:HGNC Symbol;Acc:HGNC:5665]
ENSG00000106078	51.8800190265778	4.31809596539274	0.932675886108006	4.62979265327837	3.66032070749708e-06	0.000372589715735533	COBL	protein_coding	ENST00000445054	ENST00000265136	23242	GO:0000578	BP	cordon-bleu WH2 repeat protein [Source:HGNC Symbol;Acc:HGNC:22199]
ENSG00000231208	35.0907756381753	4.30883104580868	0.90184380516075	4.77780190000934	1.77221848375295e-06	0.000227903512914222	ZBTB46-AS1	lncRNA	ENST00000435912	ENST00000435912	NA	NA	NA	ZBTB46 antisense RNA 1 [Source:HGNC Symbol;Acc:HGNC:40753]
ENSG00000231739	8.25621841926139	4.30778918645333	1.31504698321	3.27576827402631	0.00105374981456953	0.0164201394132318	GAPDHP59	processed_pseudogene	ENST00000435908	ENST00000435908	NA	NA	NA	glyceraldehyde-3-phosphate dehydrogenase pseudogene 59 [Source:HGNC Symbol;Acc:HGNC:4152]
ENSG00000287505	9.93517942144308	4.30740213584899	1.58545616319192	2.71682196950632	0.00659120514113849	0.0523932663836737		lncRNA	ENST00000657004	ENST00000657004	NA	NA	NA	novel transcript
ENSG00000205086	9.7914900801756	4.29298825992492	1.73370913766365	2.47618713350623	0.0132793955108327	0.0810034159654711	LINC02898	lncRNA	ENST00000378711	ENST00000649862	400950	NA	NA	long intergenic non-protein coding RNA 2898 [Source:HGNC Symbol;Acc:HGNC:42966]
ENSG00000170703	15.6564147277882	4.29296300377081	0.85857859470591	5.000081565324	5.73060663689093e-07	0.000107854792411818	TTLL6	protein_coding	ENST00000433608	ENST00000393382	284076	GO:0000226	MF	tubulin tyrosine ligase like 6 [Source:HGNC Symbol;Acc:HGNC:26664]
ENSG00000259575	3.14901646913837	4.28924462851931	1.80975003890171	2.37007572113237	0.0177844425569062	0.0971863137105747		lncRNA	ENST00000558572	ENST00000558572	NA	NA	NA	novel transcript, antisense to RORA
ENSG00000232667	3.07976702463507	4.28683887650175	1.27408556445124	3.36463970404384	0.000766436718641029	0.0133667747417047		lncRNA	ENST00000627003	ENST00000627003	NA	NA	NA	novel transcript, antisense to CD36
ENSG00000286898	4.70396408380919	4.28431924734379	1.15434760312794	3.71146371832413	0.000206064207421176	0.00586787722566716		lncRNA	ENST00000654887	ENST00000654887	NA	NA	NA	novel transcript, antisense to MFAP2
ENSG00000272168	1214.68077200636	4.27901790812073	0.652523760424709	6.5576430586001	5.46648609169634e-11	2.46921176761924e-07	CASC15	lncRNA	ENST00000651481	ENST00000688254	NA	NA	NA	cancer susceptibility 15 [Source:HGNC Symbol;Acc:HGNC:28245]
ENSG00000211920	11.1690671730896	4.23804876501761	1.06894977087474	3.96468466572526	7.3493034325517e-05	0.00293128508651974	IGHD6-13	IG_D_gene	ENST00000390580	ENST00000390580	NA	NA	NA	immunoglobulin heavy diversity 6-13 [Source:HGNC Symbol;Acc:HGNC:5514]
ENSG00000211931	13.9638954664152	4.2354576553154	1.0818675726168	3.91495018662106	9.04228744030683e-05	0.00339306437116228	IGHD2-2	IG_D_gene	ENST00000390591	ENST00000390591	NA	NA	NA	immunoglobulin heavy diversity 2-2 [Source:HGNC Symbol;Acc:HGNC:5490]
ENSG00000238987	3.02243796043843	4.22389177814651	1.52000091183264	2.77887450281449	0.00545475946961721	0.0462924349915659	RNU7-133P	snRNA	ENST00000459188	ENST00000459188	NA	NA	NA	RNA, U7 small nuclear 133 pseudogene [Source:HGNC Symbol;Acc:HGNC:45667]
ENSG00000171773	4.38328198624132	4.18744954573676	1.26294589606412	3.31562069189713	0.000914398470423677	0.0149785598944832	NXNL1	protein_coding	ENST00000301944	ENST00000301944	115861	GO:0001750	CC	nucleoredoxin like 1 [Source:HGNC Symbol;Acc:HGNC:25179]
ENSG00000270682	2.90642847817968	4.1744947267776	1.56117662646882	2.67394134398473	0.0074965562150128	0.0568389015567354		processed_pseudogene	ENST00000604497	ENST00000604497	NA	NA	NA	ribosomal protein L39 (RPL39) pseudogene
ENSG00000226520	8.36125484270341	4.17234885911608	1.30698599879037	3.19234396005592	0.00141123171418095	0.0200484398926669	KIRREL1-IT1	lncRNA	ENST00000419415	ENST00000419415	NA	NA	NA	KIRREL1 intronic transcript 1 [Source:HGNC Symbol;Acc:HGNC:41412]
ENSG00000249170	2.89804257640848	4.16464930347787	1.69039605189876	2.46371215715978	0.0137506489895829	0.0829529423109477		processed_pseudogene	ENST00000514650	ENST00000514650	NA	NA	NA	solute carrier family 35, member A4 (SLC35A4) pseudogene
ENSG00000291189	45.583279724275	4.15493381011291	1.38534561666347	2.99920378000677	0.00270686195078083	0.029894609857401		lncRNA	ENST00000505276	ENST00000636557	NA	NA	NA	novel transcript
ENSG00000259907	4.26919000476544	4.14605819563713	1.60584953799206	2.58184723882744	0.00982730737818356	0.0668257019690968		lncRNA	ENST00000561794	ENST00000561794	NA	NA	NA	novel transcript
ENSG00000259481	16.0875685257534	4.145763495006	1.18604844930207	3.49544194206029	0.000473277403233109	0.00991440709752558		lncRNA	ENST00000560876	ENST00000560876	NA	NA	NA	novel transcript, antisense to RORA
ENSG00000214145	4.18973946720102	4.13196297882204	1.64476864714829	2.51218491183308	0.0119986199846671	0.0760003736662457	LINC00887	lncRNA	ENST00000456816	ENST00000670716	NA	NA	NA	long intergenic non-protein coding RNA 887 [Source:HGNC Symbol;Acc:HGNC:48574]
ENSG00000207402	4.22543629519328	4.13126328834128	1.38054839198516	2.99247988141926	0.0027672090539272	0.0303385516907504	RNU6-959P	snRNA	ENST00000384671	ENST00000384671	NA	NA	NA	RNA, U6 small nuclear 959, pseudogene [Source:HGNC Symbol;Acc:HGNC:47922]
ENSG00000290529	2.81240404816573	4.12478522309447	1.33688311924561	3.0853746028464	0.00203295928426048	0.025055599145988		lncRNA	ENST00000448600	ENST00000661630	NA	NA	NA	novel transcript
ENSG00000258897	5.91947541704411	4.11916771957631	1.5611451901493	2.63855517447571	0.00832601504708793	0.0604587139470086	EGLN3-AS1	lncRNA	ENST00000555922	ENST00000555922	NA	NA	NA	EGLN3 antisense RNA 1 [Source:HGNC Symbol;Acc:HGNC:49077]
ENSG00000242134	4.06697096271234	4.10278907792909	1.30589258584166	3.1417508012612	0.00167940906430457	0.0223279850596833	RPL5P13	processed_pseudogene	ENST00000462840	ENST00000462840	NA	NA	NA	ribosomal protein L5 pseudogene 13 [Source:HGNC Symbol;Acc:HGNC:37023]
ENSG00000229192	23.9353977438572	4.10124938091064	1.06906300030452	3.83630279950052	0.000124900398952246	0.00415598601891194		lncRNA	ENST00000455078	ENST00000412996	NA	NA	NA	novel transcript
ENSG00000258710	41.1425181758738	4.10113312191184	0.99588368777971	4.11808444322969	3.82034717225424e-05	0.00192005654265061	LINC01193	lncRNA	ENST00000553416	ENST00000664036	348120	NA	NA	long intergenic non-protein coding RNA 1193 [Source:HGNC Symbol;Acc:HGNC:28003]
ENSG00000237020	14.5864952760337	4.09183122726416	1.38072508594225	2.96353797647689	0.00304124532519577	0.0320123626773301	IGHD1-20	IG_D_gene	ENST00000450276	ENST00000450276	NA	NA	NA	immunoglobulin heavy diversity 1-20 [Source:HGNC Symbol;Acc:HGNC:5484]
ENSG00000236202	2.76339263497617	4.08568474332965	1.1631959697637	3.51246466591494	0.000443971034462876	0.00952192095921098	GRM7-AS1	lncRNA	ENST00000420230	ENST00000427273	100873937	NA	NA	GRM7 antisense RNA 1 [Source:HGNC Symbol;Acc:HGNC:40267]
ENSG00000229961	20.9920276455799	4.08020289039903	1.57373311398151	2.59269049761316	0.00952284263352258	0.0654836509090736		transcribed_unprocessed_pseudogene	ENST00000639750	ENST00000639750	NA	NA	NA	novel SLAM family member pseudogene
ENSG00000085276	1913.532114944	4.07913378994827	1.08601721938436	3.75604890708882	0.000172616974770181	0.00521097990706988	MECOM	protein_coding	ENST00000464456	ENST00000651503	2122	GO:0000118	CC	MDS1 and EVI1 complex locus [Source:HGNC Symbol;Acc:HGNC:3498]
ENSG00000133115	6.13826902101651	4.07852508563991	1.70896480913531	2.38654714470307	0.0170074265885279	0.094799195580001	STOML3	protein_coding	ENST00000379631	ENST00000379631	161003	GO:0003674	MF	stomatin like 3 [Source:HGNC Symbol;Acc:HGNC:19420]
ENSG00000288807	21.9723837121922	4.06390030649041	1.00447896975423	4.04577938300168	5.21493288473179e-05	0.00234096558497118		lncRNA	ENST00000692397	ENST00000692397	NA	NA	NA	novel transcript
ENSG00000287962	57.9681222392821	4.05328572952229	1.19809134276702	3.383119120251	0.000716675398006896	0.012782715785971		lncRNA	ENST00000659342	ENST00000659342	NA	NA	NA	novel transcript
ENSG00000244040	4392.72592803716	4.02420941250533	1.09377305231453	3.67919963285776	0.000233967072169943	0.00636165095555535	IL12A-AS1	lncRNA	ENST00000642756	ENST00000497452	101928376	NA	NA	IL12A antisense RNA 1 [Source:HGNC Symbol;Acc:HGNC:49094]
ENSG00000290592	58.550479681159	4.01589277851924	1.34407345487381	2.98785216236286	0.0028094541676429	0.0306436570485795		lncRNA	ENST00000457239	ENST00000457239	NA	NA	NA	novel transcript
ENSG00000249916	6.94338229353477	3.99245262264758	1.4002771964314	2.85118734549297	0.00435562979950733	0.0402030749514679		lncRNA	ENST00000507143	ENST00000507143	NA	NA	NA	novel transcript
ENSG00000183185	5.02048344982836	3.98474123913937	1.59981432224444	2.4907523227752	0.0127472946583602	0.0790249167566486	GABRR3	protein_coding	ENST00000472788	ENST00000472788	200959	GO:0004890	BP	gamma-aminobutyric acid type A receptor subunit rho3 [Source:HGNC Symbol;Acc:HGNC:17969]
ENSG00000291288	25.6735576813716	3.97837572477685	1.30350830826453	3.0520524491889	0.00227282383359073	0.0268441428380168		lncRNA	ENST00000650314	ENST00000650314	NA	NA	NA	novel transcript
ENSG00000202184	7.26374941557025	3.97635857319058	0.961550798560411	4.13535985737186	3.54398839966933e-05	0.00183212539070745	RNU6-1283P	snRNA	ENST00000365314	ENST00000365314	NA	NA	NA	RNA, U6 small nuclear 1283, pseudogene [Source:HGNC Symbol;Acc:HGNC:48246]
ENSG00000225222	17.2796168815321	3.96519249079542	0.776887544517958	5.10394653483052	3.32642289116726e-07	7.84280053131791e-05	CHCHD4P5	processed_pseudogene	ENST00000436684	ENST00000436684	NA	NA	NA	coiled-coil-helix-coiled-coil-helix domain containing 4 pseudogene 5 [Source:HGNC Symbol;Acc:HGNC:44493]
ENSG00000257910	10.8858320272993	3.9624337388697	1.43181886532813	2.76741271876009	0.00565031730727515	0.0472419866301932		lncRNA	ENST00000552426	ENST00000552426	NA	NA	NA	novel transcript, antisense to CSRP2
ENSG00000268555	421.165017018588	3.95950848420215	0.704634447290152	5.61923774721692	1.91801773519784e-08	1.05014377089559e-05		lncRNA	ENST00000596996	ENST00000662322	NA	NA	NA	novel transcript
ENSG00000176884	50.1721865163559	3.94639652216878	1.00938270242712	3.90971284992248	9.24059013295262e-05	0.00343751881754288	GRIN1	protein_coding	ENST00000371560	ENST00000371561	2902	GO:0001540	BP	glutamate ionotropic receptor NMDA type subunit 1 [Source:HGNC Symbol;Acc:HGNC:4584]
ENSG00000259060	13.8773519125551	3.94383444931297	1.36032775970159	2.89917956991344	0.003741405501647	0.0363928477005427		protein_coding	ENST00000335950	ENST00000555283	NA	NA	NA	novel protein
ENSG00000173464	13.8773519125551	3.94383444931297	1.36032775970159	2.89917956991344	0.003741405501647	0.0363928477005427	RNASE11	protein_coding	ENST00000557105	ENST00000553849	122651	GO:0003676	MF	ribonuclease A family member 11 (inactive) [Source:HGNC Symbol;Acc:HGNC:19269]
ENSG00000279417	3.75917362891616	3.94333247613446	1.32414543342836	2.9780206740016	0.00290116414975614	0.0311457123338051		TEC	ENST00000623470	ENST00000623470	NA	NA	NA	novel transcript
ENSG00000124839	17.7621012124354	3.93269068551282	1.05903261311947	3.71347457745305	0.000204433009687369	0.00583685298019576	RAB17	protein_coding	ENST00000392001	ENST00000264601	64284	GO:0002415	MF	RAB17, member RAS oncogene family [Source:HGNC Symbol;Acc:HGNC:16523]
ENSG00000230661	3.74256832972352	3.9323518526994	1.11931490554383	3.51317742060162	0.000442781704193705	0.00950847773100229	YY1P1	processed_pseudogene	ENST00000427625	ENST00000427625	NA	NA	NA	YY1 transcription factor pseudogene 1 [Source:HGNC Symbol;Acc:HGNC:45094]
ENSG00000218730	5.36355062085448	3.91854204244632	1.00773486272011	3.88846529718072	0.00010088009066563	0.00361288697353142		processed_pseudogene	ENST00000404861	ENST00000404861	NA	NA	NA	A kinase (PRKA) interacting protein 1 (AKIP1) pseudogene
ENSG00000239079	10.3119751800017	3.91429222510488	0.839143011335777	4.66463066751157	3.09171823696152e-06	0.000337495355224526		snoRNA	ENST00000458998	ENST00000458998	124902828	NA	NA	NULL
ENSG00000284196	3.68904351424906	3.91178862646985	1.62824706780315	2.40245396649029	0.0162854841317948	0.0920525973074511		lncRNA	ENST00000648514	ENST00000648514	NA	NA	NA	novel transcript
ENSG00000132329	240.179881210336	3.90906552353152	0.80670904689889	4.84569441554988	1.26169590177683e-06	0.000179498594907903	RAMP1	protein_coding	ENST00000404910	ENST00000254661	10267	GO:0001525	BP	receptor activity modifying protein 1 [Source:HGNC Symbol;Acc:HGNC:9843]
ENSG00000287159	31.2903099608605	3.90742780940505	1.43288491615281	2.72696555414666	0.00639197113851407	0.0513860442850599		lncRNA	ENST00000662499	ENST00000662499	105370315	NA	NA	novel transcript, antisense to GPC5
ENSG00000232072	23.8995542450081	3.90523582045875	1.10824359414145	3.52380635548282	0.000425395015463096	0.00927145613918845		lncRNA	ENST00000424359	ENST00000433337	NA	NA	NA	novel transcript
ENSG00000226159	148.662340031228	3.89397369806101	0.956062739770721	4.0729269493285	4.64259890730495e-05	0.00219300593613558	LINC01375	lncRNA	ENST00000428485	ENST00000428485	101926924	NA	NA	long intergenic non-protein coding RNA 1375 [Source:HGNC Symbol;Acc:HGNC:50632]
ENSG00000264434	8.60416205358133	3.88898221861734	1.28334332354464	3.03035216474717	0.00244268737222741	0.028146986888651		lncRNA	ENST00000580645	ENST00000580645	NA	NA	NA	novel transcript, antisense to ZNF521
ENSG00000100302	7.14776865439837	3.88662046735003	1.10346095673419	3.52220932116428	0.000427966083479077	0.00931064563070436	RASD2	protein_coding	ENST00000216127	ENST00000216127	23551	GO:0001963	MF	RASD family member 2 [Source:HGNC Symbol;Acc:HGNC:18229]
ENSG00000197891	18.9737383134976	3.87036618235201	0.937794060628183	4.12709607028161	3.67372945120676e-05	0.00186977306265926	SLC22A12	protein_coding	ENST00000377567	ENST00000377574	116085	GO:0005886	BP	solute carrier family 22 member 12 [Source:HGNC Symbol;Acc:HGNC:17989]
ENSG00000244620	870.030963365615	3.86591825087671	0.771092852963205	5.01355736344918	5.34328278328384e-07	0.000102704716306779		lncRNA	ENST00000414005	ENST00000414005	NA	NA	NA	novel transcript
ENSG00000196104	340.137488104311	3.86293829770641	1.09578212865592	3.52527952107109	0.000423036158782776	0.00923851096764701	SPOCK3	protein_coding	ENST00000357154	ENST00000357545	50859	GO:0005509	MF	SPARC (osteonectin), cwcv and kazal like domains proteoglycan 3 [Source:HGNC Symbol;Acc:HGNC:13565]
ENSG00000285845	245.674535114268	3.86274830425322	0.983149409777407	3.92895348950856	8.53163371119535e-05	0.00326288042829279		lncRNA	ENST00000650205	ENST00000650205	NA	NA	NA	novel transcript
ENSG00000223436	18.5220494730999	3.86087659932385	0.960269929210851	4.0206159558664	5.80461686534393e-05	0.00251807485049302		lncRNA	ENST00000455442	ENST00000455442	NA	NA	NA	novel transcript
ENSG00000240893	3.52839555263925	3.86031170643615	1.31437415140373	2.93699606182411	0.00331408312318927	0.0337060815478658	LINC02042	lncRNA	ENST00000481624	ENST00000481624	101929694	NA	NA	long intergenic non-protein coding RNA 2042 [Source:HGNC Symbol;Acc:HGNC:52882]
ENSG00000286534	17.7821190713032	3.84017137848868	1.22809940366935	3.12692227275326	0.00176646622590362	0.0230111836839413		lncRNA	ENST00000666804	ENST00000666804	NA	NA	NA	novel transcript
ENSG00000289536	18.2203449151217	3.83656167181198	1.22859774628353	3.12271586320052	0.00179190648009187	0.0232087213493189		lncRNA	ENST00000691966	ENST00000691966	NA	NA	NA	novel transcript
ENSG00000275896	53.122370189055	3.82137990947666	0.866878074625022	4.40820920650189	1.04228842063221e-05	0.000768655803427868	PRSS2	protein_coding	ENST00000632998	ENST00000539842	5645	GO:0004222	CC	serine protease 2 [Source:HGNC Symbol;Acc:HGNC:9483]
ENSG00000249790	147.433627671255	3.82071805611127	1.22468672430516	3.11975134561779	0.00181003763702876	0.0234016171920112	LINC02972	lncRNA	ENST00000422780	ENST00000514568	NA	NA	NA	long intergenic non-protein coding RNA 2972 [Source:HGNC Symbol;Acc:HGNC:56013]
ENSG00000287281	6.75835038409645	3.81336996334923	1.56086129821472	2.44311904440893	0.0145609333468059	0.0858674241246156		lncRNA	ENST00000657893	ENST00000657893	107985177	NA	NA	novel transcript
ENSG00000239552	145.565279021513	3.81009660328431	0.940508231718758	4.05110394017652	5.09765550487719e-05	0.00230838194641907	HOXB-AS2	lncRNA	ENST00000464382	ENST00000464382	NA	NA	NA	HOXB cluster antisense RNA 2 [Source:HGNC Symbol;Acc:HGNC:40284]
ENSG00000211928	23.8810414065246	3.80370360332107	1.00135241366149	3.79856637026783	0.000145535459434543	0.00460111055304167	IGHD5-5	IG_D_gene	ENST00000390588	ENST00000390588	NA	NA	NA	immunoglobulin heavy diversity 5-5 [Source:HGNC Symbol;Acc:HGNC:5511]
ENSG00000163915	289.315243420622	3.79800959946875	0.718835680135431	5.28355743102956	1.26699119620688e-07	4.051680873109e-05	IGF2BP2-AS1	lncRNA	ENST00000470754	ENST00000456447	646600	NA	NA	IGF2BP2 antisense RNA 1 [Source:HGNC Symbol;Acc:HGNC:32674]
ENSG00000289140	6.95318613339086	3.79278977790823	1.45839264007467	2.60066437095708	0.00930434336721452	0.0645371626306004		lncRNA	ENST00000693291	ENST00000693291	NA	NA	NA	novel transcript
ENSG00000251138	25.20980978924	3.78713374897099	1.06152790509304	3.56762524169258	0.000360231213488449	0.00835514449975519	LINC02882	lncRNA	ENST00000549905	ENST00000663261	100507377	NA	NA	long intergenic non-protein coding RNA 2882 [Source:HGNC Symbol;Acc:HGNC:54802]
ENSG00000268081	256.66244503201	3.7867417287638	0.583381297456073	6.49102353002487	8.52551610358799e-11	3.08078049919256e-07		lncRNA	ENST00000594564	ENST00000594564	NA	NA	NA	novel transcript, antisense to ZNF429
ENSG00000261816	7.76530786307327	3.78549051954098	1.14984570634972	3.29217259205875	0.000994165800152503	0.0158610045714397		lncRNA	ENST00000568587	ENST00000568587	NA	NA	NA	novel transcript
ENSG00000257271	37.8444410658803	3.78233129064468	0.862635406385534	4.38462328655481	1.16186666417072e-05	0.00081842521981429	KIRREL3-AS1	lncRNA	ENST00000548204	ENST00000548204	NA	NA	NA	KIRREL3 antisense RNA 1 [Source:HGNC Symbol;Acc:HGNC:42655]
ENSG00000185433	46.374803812766	3.7731921182314	1.13372381933335	3.32814046409477	0.00087427773288279	0.0145790955955019	LINC00158	lncRNA	ENST00000653079	ENST00000332587	54072	NA	NA	long intergenic non-protein coding RNA 158 [Source:HGNC Symbol;Acc:HGNC:1283]
ENSG00000204179	35.9243187409643	3.75313625916962	1.15916114692163	3.23780370756628	0.0012045365525466	0.018039270319598	PTPN20	protein_coding	ENST00000374342	ENST00000374339	26095	GO:0005654	CC	protein tyrosine phosphatase non-receptor type 20 [Source:HGNC Symbol;Acc:HGNC:23423]
ENSG00000204655	8.00708002593344	3.74767795300504	1.24032111367736	3.02153846425605	0.00251493685640323	0.0285640796227573	MOG	protein_coding	ENST00000376903	ENST00000376917	4340	GO:0001618	MF	myelin oligodendrocyte glycoprotein [Source:HGNC Symbol;Acc:HGNC:7197]
ENSG00000223985	37.8481253767558	3.74710653280889	1.29907003102559	2.88445306512892	0.00392094200788956	0.0374928087136326	LINC01874	lncRNA	ENST00000427398	ENST00000656189	727944	NA	NA	long intergenic non-protein coding RNA 1874 [Source:HGNC Symbol;Acc:HGNC:52693]
ENSG00000255480	6.76375954830226	3.74356073806865	1.50248869436355	2.49157331573427	0.0127178716421928	0.0789230326726253		lncRNA	ENST00000529078	ENST00000529078	NA	NA	NA	novel transcript
ENSG00000119508	1608.18703561177	3.7350691552137	0.816218940341729	4.57606283143824	4.73808296679424e-06	0.00045321421953158	NR4A3	protein_coding	ENST00000338488	ENST00000395097	8013	GO:0000122	BP	nuclear receptor subfamily 4 group A member 3 [Source:HGNC Symbol;Acc:HGNC:7982]
ENSG00000102678	44.3136902890901	3.7272547052271	0.877457303488023	4.247790394371	2.15889233821876e-05	0.00129067987786591	FGF9	protein_coding	ENST00000382353	ENST00000382353	2254	GO:0000122	BP	fibroblast growth factor 9 [Source:HGNC Symbol;Acc:HGNC:3687]
ENSG00000222042	88.0623555750058	3.72327461879276	1.09270959451988	3.4073779872215	0.000655902260251785	0.012185955823372		lncRNA	ENST00000409758	ENST00000656005	NA	NA	NA	novel transcript
ENSG00000267257	15.7086299324169	3.71788126588704	0.801519170911531	4.63854315756273	3.50873673062771e-06	0.000363300030080123		lncRNA	ENST00000591360	ENST00000591360	NA	NA	NA	novel transcript, antisense to ALPK2
ENSG00000231985	14.4200776269603	3.71436249852641	1.21146699201029	3.06600388043826	0.00216940499352943	0.026044391643249		lncRNA	ENST00000446438	ENST00000446438	NA	NA	NA	novel transcript
ENSG00000227108	14.9032304117464	3.7046413104874	1.10952083678849	3.33895604990213	0.000840938680712023	0.0142597609266844	IGHD1-14	IG_D_gene	ENST00000451044	ENST00000451044	NA	NA	NA	immunoglobulin heavy diversity 1-14 (non-functional) [Source:HGNC Symbol;Acc:HGNC:5483]
ENSG00000232046	68.9886511548345	3.70110943412515	0.706151151744904	5.24124250874573	1.59498930941011e-07	4.68589704754826e-05	LINC01798	lncRNA	ENST00000433396	ENST00000433396	NA	NA	NA	long intergenic non-protein coding RNA 1798 [Source:HGNC Symbol;Acc:HGNC:52588]
ENSG00000285988	99.5399555133668	3.70021078165741	0.990268938596599	3.73657158923041	0.000186546355325894	0.00549043419905863		lncRNA	ENST00000648995	ENST00000648995	NA	NA	NA	novel transcript, LINP1-LINC00707 readthrough
ENSG00000230881	6.25613210927087	3.68661821407193	1.09429474855202	3.3689444447669	0.000754566360508981	0.013210760660539		lncRNA	ENST00000440249	ENST00000440249	NA	NA	NA	novel transcript
ENSG00000225000	40.8440758052561	3.6780979581635	0.755761526211756	4.86674411252438	1.13451767260659e-06	0.000168711648630913		lncRNA	ENST00000411797	ENST00000411797	NA	NA	NA	novel transcript
ENSG00000289579	8.01183488229382	3.67098574429458	1.1292560447521	3.2508001718073	0.00115080712960036	0.0174436100818955		lncRNA	ENST00000691590	ENST00000691590	NA	NA	NA	novel transcript, sense intronic to PTRF
ENSG00000280560	784.059039131048	3.6706708653303	0.958157485703269	3.83096820731521	0.000127639999217312	0.00420839325886567	LINC01374	lncRNA	ENST00000629067	ENST00000664430	105378425	NA	NA	long intergenic non-protein coding RNA 1374 [Source:HGNC Symbol;Acc:HGNC:50631]
ENSG00000267177	12.787526707239	3.66082612193391	1.04942515133754	3.48841088596746	0.000485900760681172	0.0100737291382529		lncRNA	ENST00000592655	ENST00000592655	NA	NA	NA	novel transcript, antisense C18orf1
ENSG00000235151	92.149481309503	3.65692573837381	0.741142070862917	4.93417643140407	8.04896584961362e-07	0.000134295979858454		lncRNA	ENST00000442867	ENST00000442867	NA	NA	NA	novel transcript
ENSG00000143816	32.322855589818	3.65386695358939	1.25449085595072	2.91262940359998	0.00358399668740628	0.0353662764325815	WNT9A	protein_coding	ENST00000272164	ENST00000272164	7483	GO:0005109	BP	Wnt family member 9A [Source:HGNC Symbol;Acc:HGNC:12778]
ENSG00000211924	32.5861192413103	3.64717071645261	0.762323520533681	4.78428202490634	1.71599603558023e-06	0.000223860045999015	IGHD3-9	IG_D_gene	ENST00000390584	ENST00000390584	NA	NA	NA	immunoglobulin heavy diversity 3-9 [Source:HGNC Symbol;Acc:HGNC:5499]
ENSG00000267466	42.5030129769495	3.63802018260399	1.09503151008043	3.32229725730612	0.000892795261045138	0.0147584856144223		lncRNA	ENST00000585798	ENST00000585798	NA	NA	NA	novel transcript
ENSG00000150760	3997.90584032881	3.63737365544185	0.845957097213595	4.29971409593062	1.71018592309775e-05	0.00108419786872036	DOCK1	protein_coding	ENST00000280333	ENST00000623213	1793	GO:0005085	BP	dedicator of cytokinesis 1 [Source:HGNC Symbol;Acc:HGNC:2987]
ENSG00000273443	9.60977525235211	3.63513438284179	1.12016496625947	3.24517771251181	0.00117377346775883	0.0177026202132443		lncRNA	ENST00000442292	ENST00000442292	NA	NA	NA	novel transcript
ENSG00000238266	114.348983017894	3.6339984764135	1.0072647005486	3.60778896990461	0.000308817505273307	0.00762113088433195	LINC00707	lncRNA	ENST00000648093	ENST00000436383	100507127	NA	NA	long intergenic non-protein coding RNA 707 [Source:HGNC Symbol;Acc:HGNC:44691]
ENSG00000109452	6152.94257261452	3.6334813088592	0.724106571945211	5.01788196604592	5.22442573495583e-07	0.000102704716306779	INPP4B	protein_coding	ENST00000513000	ENST00000262992	8821	GO:0005515	MF	inositol polyphosphate-4-phosphatase type II B [Source:HGNC Symbol;Acc:HGNC:6075]
ENSG00000254109	73.3246110221329	3.63266555393774	0.945932715468314	3.84030015511121	0.000122883972222968	0.0041230596288293	RBPMS-AS1	lncRNA	ENST00000517521	ENST00000517521	100128750	NA	NA	RBPMS antisense RNA 1 [Source:HGNC Symbol;Acc:HGNC:48721]
ENSG00000113070	1355.65199206814	3.62886614980738	0.759471600495397	4.77814594705095	1.76918950649489e-06	0.000227903512914222	HBEGF	protein_coding	ENST00000230990	ENST00000230990	1839	GO:0005154	BP	heparin binding EGF like growth factor [Source:HGNC Symbol;Acc:HGNC:3059]
ENSG00000282989	5.59308122483484	3.62863838449893	1.05209167265057	3.44897548267555	0.000562717791912303	0.0110572975141615	PDCL3P2	processed_pseudogene	ENST00000635554	ENST00000635554	NA	NA	NA	PDCL3 pseudogene 2 [Source:HGNC Symbol;Acc:HGNC:31705]
ENSG00000225144	11.1720711335462	3.62712948127185	1.22902672542576	2.95122099970231	0.00316520356186435	0.0328577408536426		lncRNA	ENST00000445459	ENST00000445459	NA	NA	NA	novel transcript
ENSG00000226777	8356.11190067803	3.62564236029787	0.728063358365913	4.97984456797189	6.36353602173915e-07	0.000116137746303821	FAM30A	lncRNA	ENST00000689219	ENST00000693413	9834	NA	NA	family with sequence similarity 30 member A [Source:HGNC Symbol;Acc:HGNC:19955]
ENSG00000231401	6.34162898675437	3.62476522696451	1.2422926285586	2.91780305512256	0.00352506916900009	0.0349947165032412		lncRNA	ENST00000668618	ENST00000660701	NA	NA	NA	novel transcript
ENSG00000287069	284.657813578575	3.6143802755965	0.872510023512164	4.14250859955435	3.4352748314382e-05	0.00179130001888674		lncRNA	ENST00000670571	ENST00000670571	NA	NA	NA	novel transcript, antisense to KCNH8
ENSG00000286273	20.0978830186718	3.6093977881112	0.712696189695826	5.06442694698798	4.09630679249417e-07	8.81096084842675e-05		lncRNA	ENST00000666451	ENST00000666451	NA	NA	NA	novel transcript, antisense to GPR87
ENSG00000211917	36.1179748658877	3.60837000160125	0.840256002607243	4.29436979968579	1.75190255998092e-05	0.00110869966562996	IGHD3-16	IG_D_gene	ENST00000390577	ENST00000390577	NA	NA	NA	immunoglobulin heavy diversity 3-16 [Source:HGNC Symbol;Acc:HGNC:5496]
ENSG00000108924	155.470442176627	3.6077830461763	1.00562238329653	3.58761211574234	0.00033372024989757	0.00797046592881599	HLF	protein_coding	ENST00000226067	ENST00000226067	3131	GO:0000785	CC	HLF transcription factor, PAR bZIP family member [Source:HGNC Symbol;Acc:HGNC:4977]
ENSG00000251803	4.41443371228655	3.60675583667227	1.23498755940077	2.92047948922037	0.00349493201882455	0.0348181280156214	Y_RNA	misc_RNA	ENST00000515994	ENST00000515994	NA	NA	NA	Y RNA [Source:RFAM;Acc:RF00019]
ENSG00000287630	26.0922588775676	3.60040275428992	0.826734490149791	4.35496861106833	1.33085987046734e-05	0.000893902458721331		lncRNA	ENST00000662767	ENST00000662767	NA	NA	NA	novel transcript, antisense to JAKMIP2
ENSG00000167889	14.6140182911104	3.58874135516412	0.922408706269151	3.89061956025918	9.9988595075201e-05	0.00359521181257459	MGAT5B	protein_coding	ENST00000569840	ENST00000569840	146664	GO:0000139	CC	alpha-1,6-mannosylglycoprotein 6-beta-N-acetylglucosaminyltransferase B [Source:HGNC Symbol;Acc:HGNC:24140]
ENSG00000177133	126.871112610936	3.57943310953704	1.27607720842565	2.80502863455507	0.00503121099111749	0.043828617654166	PRDM16-DT	lncRNA	ENST00000606861	ENST00000687743	440556	NA	NA	PRDM16 divergent transcript [Source:HGNC Symbol;Acc:HGNC:48664]
ENSG00000285354	34.776048306569	3.57376954065015	0.96720582132595	3.69494213315512	0.00021993687138217	0.00609949254356568		lncRNA	ENST00000643867	ENST00000643867	NA	NA	NA	novel transcript
ENSG00000288730	107.546446671036	3.57308655046236	0.738057743979796	4.84120189728702	1.29056167209088e-06	0.000182170846026078		lncRNA	ENST00000691749	ENST00000691749	NA	NA	NA	novel transcript
ENSG00000053747	133.93261299356	3.56894790570504	0.854457406870075	4.17685876090453	2.95562418990141e-05	0.00160608174024477	LAMA3	protein_coding	ENST00000313654	ENST00000313654	3909	GO:0005102	BP	laminin subunit alpha 3 [Source:HGNC Symbol;Acc:HGNC:6483]
ENSG00000184937	371.171308702189	3.56684817616073	1.23319539353377	2.89236255249039	0.0038235644081113	0.0369039325458092	WT1	protein_coding	ENST00000379079	ENST00000452863	7490	GO:0000122	BP	WT1 transcription factor [Source:HGNC Symbol;Acc:HGNC:12796]
ENSG00000226990	4.10908407702175	3.56672532063789	1.25465898263097	2.84278466899316	0.00447212737393925	0.0408114102309702		lncRNA	ENST00000413286	ENST00000413286	NA	NA	NA	novel transcript
ENSG00000232543	38.3477826014174	3.56370423174977	1.06263033629709	3.35366317902055	0.00079749375052482	0.0137099115932278	IGHD4-11	IG_D_gene	ENST00000431440	ENST00000431440	NA	NA	NA	immunoglobulin heavy diversity 4-11 (non-functional) [Source:HGNC Symbol;Acc:HGNC:5502]
ENSG00000196482	182.948128602244	3.55793679196052	1.38384264599507	2.57105589443816	0.010138896160491	0.0683670743899056	ESRRG	protein_coding	ENST00000616180	ENST00000408911	2104	GO:0000785	CC	estrogen related receptor gamma [Source:HGNC Symbol;Acc:HGNC:3474]
ENSG00000188389	960.949697465798	3.55721278156723	0.844382503901285	4.21279783170767	2.52226804864042e-05	0.00143912224482709	PDCD1	protein_coding	ENST00000334409	ENST00000334409	5133	GO:0001783	BP	programmed cell death 1 [Source:HGNC Symbol;Acc:HGNC:8760]
ENSG00000228853	51.6039947672891	3.55445810618804	0.906198652716501	3.92238290747055	8.76775061836502e-05	0.0033106733160422	NEGR1-IT1	lncRNA	ENST00000453121	ENST00000453121	100852409	NA	NA	NEGR1 intronic transcript 1 [Source:HGNC Symbol;Acc:HGNC:41432]
ENSG00000254237	2.87262247024279	3.55352447952336	1.22795677526159	2.8938514376993	0.00380548166213704	0.036778519749394		lncRNA	ENST00000670837	ENST00000522129	105379230	NA	NA	novel transcript
ENSG00000207449	2.86142273077148	3.55284067935037	1.23013811502783	2.88816404918075	0.00387497717168759	0.037201428022344	RNU6-19P	snRNA	ENST00000384718	ENST00000384718	NA	NA	NA	RNA, U6 small nuclear 19, pseudogene [Source:HGNC Symbol;Acc:HGNC:34263]
ENSG00000251059	8.56419065253872	3.55108094003769	1.31818718639581	2.69391250096055	0.00706187008349572	0.0547965938022764	PRKG2-AS1	lncRNA	ENST00000512502	ENST00000512502	101928942	NA	NA	PRKG2 antisense RNA 1 [Source:HGNC Symbol;Acc:HGNC:40478]
ENSG00000265413	2.83136344996223	3.54873453975289	1.28465448801352	2.76240387813562	0.00573774537735148	0.0477629963040712		lncRNA	ENST00000578897	ENST00000578897	NA	NA	NA	novel transcript, sense intronic to PTPRM
ENSG00000234485	2.89771435598291	3.54693200754476	1.34984264232761	2.62766332631823	0.00859735588250319	0.0617151474314929	OR7E46P	unprocessed_pseudogene	ENST00000503990	ENST00000503990	NA	NA	NA	olfactory receptor family 7 subfamily E member 46 pseudogene [Source:HGNC Symbol;Acc:HGNC:8420]
ENSG00000287336	5.72697077381636	3.54520475945909	1.03002796445104	3.44185292226365	0.000577744282171199	0.0111907911557299		lncRNA	ENST00000661895	ENST00000661895	NA	NA	NA	novel transcript, antisense to DNM3
ENSG00000211914	13.4956174071873	3.53987994004192	1.02049377128971	3.4687913239962	0.000522805362743397	0.0105701099499651	IGHD6-19	IG_D_gene	ENST00000390574	ENST00000390574	NA	NA	NA	immunoglobulin heavy diversity 6-19 [Source:HGNC Symbol;Acc:HGNC:5515]
ENSG00000236170	7.02720329228753	3.53924867435816	1.04549808805538	3.38522730437616	0.000711193350469952	0.0127415383800606	IGHD1-1	IG_D_gene	ENST00000454908	ENST00000454908	NA	GO:0002250	BP	immunoglobulin heavy diversity 1-1 [Source:HGNC Symbol;Acc:HGNC:5482]
ENSG00000143995	3852.09824207073	3.5368730416752	0.670891000597292	5.27190413722399	1.35015598099608e-07	4.25928842657855e-05	MEIS1	protein_coding	ENST00000496248	ENST00000272369	4211	GO:0000785	CC	Meis homeobox 1 [Source:HGNC Symbol;Acc:HGNC:7000]
ENSG00000150722	26.2553230579378	3.52835148088986	0.883055637044405	3.99561628155082	6.45261755660896e-05	0.00268940931978802	PPP1R1C	protein_coding	ENST00000495820	ENST00000682840	151242	GO:0004864	MF	protein phosphatase 1 regulatory inhibitor subunit 1C [Source:HGNC Symbol;Acc:HGNC:14940]
ENSG00000263667	8.96460601660305	3.52023534392102	1.28568504159787	2.7380231005457	0.00618097340908942	0.0502713605921349		lncRNA	ENST00000580119	ENST00000580119	285766	NA	NA	novel transcript
ENSG00000064692	202.665747829519	3.51913606110448	1.10642031453417	3.18065026001091	0.00146944912138972	0.0206047603881126	SNCAIP	protein_coding	ENST00000514467	ENST00000261368	9627	GO:0005515	MF	synuclein alpha interacting protein [Source:HGNC Symbol;Acc:HGNC:11139]
ENSG00000154188	7831.53508247637	3.51333346208549	0.729833101413039	4.81388615463355	1.48023154880674e-06	0.000200483324632944	ANGPT1	protein_coding	ENST00000517746	ENST00000517746	284	GO:0001525	BP	angiopoietin 1 [Source:HGNC Symbol;Acc:HGNC:484]
ENSG00000213657	2.76610470371446	3.50757945208867	1.35657702902392	2.58561023594247	0.00972067833489336	0.0664145268121963	RPL31P44	processed_pseudogene	ENST00000447680	ENST00000447680	NA	NA	NA	ribosomal protein L31 pseudogene 44 [Source:HGNC Symbol;Acc:HGNC:35523]
ENSG00000160191	191.157970419108	3.50552909147961	0.916117868236354	3.82650444121148	0.000129975805591194	0.00424552800583214	PDE9A	protein_coding	ENST00000291539	ENST00000291539	5152	GO:0004114	CC	phosphodiesterase 9A [Source:HGNC Symbol;Acc:HGNC:8795]
ENSG00000287277	626.286774037219	3.49545877482973	1.00105102210828	3.49178882757451	0.000479797413926938	0.0100099816981316		lncRNA	ENST00000665216	ENST00000664549	NA	NA	NA	novel transcript
ENSG00000250328	43.7769128323984	3.49532120757381	1.13090969042048	3.09071647115716	0.00199674198376565	0.024851743923199	MGC32805	lncRNA	ENST00000510972	ENST00000510972	153163	NA	NA	uncharacterized LOC153163 [Source:NCBI gene (formerly Entrezgene);Acc:153163]
ENSG00000171517	19.2220502706877	3.48479802902936	0.75185652144107	4.63492425702461	3.57068197974979e-06	0.000365524543966681	LPAR3	protein_coding	ENST00000440886	ENST00000370611	23566	GO:0004930	BP	lysophosphatidic acid receptor 3 [Source:HGNC Symbol;Acc:HGNC:14298]
ENSG00000289636	13.1314574722327	3.47878028137794	1.19565074446803	2.90952880468931	0.00361974029465329	0.035573275846503		lncRNA	ENST00000688345	ENST00000688345	NA	NA	NA	novel transcript
ENSG00000172260	4373.15591868388	3.47719332455491	0.792731342797604	4.38634520527933	1.15271130384421e-05	0.000816752464229694	NEGR1	protein_coding	ENST00000357731	ENST00000357731	257194	GO:0005515	MF	neuronal growth regulator 1 [Source:HGNC Symbol;Acc:HGNC:17302]
ENSG00000244610	5.17425543261792	3.47570537289781	1.05160327789526	3.30514885789848	0.000949259686557666	0.0153684803017239	RN7SL756P	misc_RNA	ENST00000488739	ENST00000488739	NA	NA	NA	RNA, 7SL, cytoplasmic 756, pseudogene [Source:HGNC Symbol;Acc:HGNC:46772]
ENSG00000204464	18.5793339087208	3.46608881198285	0.736820016770774	4.70411868989868	2.54964898305726e-06	0.000297206824683088	TMEM51-AS2	lncRNA	ENST00000625027	ENST00000424792	727684	NA	NA	TMEM51 antisense RNA 2 [Source:HGNC Symbol;Acc:HGNC:32332]
ENSG00000164116	5229.08720595372	3.46524143986019	0.835631256383322	4.14685474411049	3.37073756003781e-05	0.00176785155978993	GUCY1A1	protein_coding	ENST00000506455	ENST00000506455	2982	GO:0004383	MF	guanylate cyclase 1 soluble subunit alpha 1 [Source:HGNC Symbol;Acc:HGNC:4685]
ENSG00000267506	80.1390516561551	3.45628348721357	0.940195900711051	3.67613120265644	0.000236797770591492	0.00641448593560281		lncRNA	ENST00000592651	ENST00000590398	NA	NA	NA	novel transcript
ENSG00000266100	39.3056011274372	3.44700859861845	0.773007888281483	4.45921529504917	8.22602609378135e-06	0.000671006047234499		lncRNA	ENST00000577189	ENST00000577189	101927557	NA	NA	novel transcript, antisense to MSI2
ENSG00000250835	3.5891360362039	3.44539939741161	1.3586518053692	2.53589579301767	0.0112160104090941	0.0728435931241959	LSM3P4	processed_pseudogene	ENST00000502948	ENST00000502948	NA	NA	NA	LSM3 homolog, U6 small nuclear RNA and mRNA degradation associated pseudogene 4 [Source:HGNC Symbol;Acc:HGNC:44349]
ENSG00000279439	4.33897064046787	3.44263998507468	1.36631196058645	2.51965882198456	0.0117468632655974	0.0749443239699204		TEC	ENST00000624795	ENST00000624795	NA	NA	NA	TEC
ENSG00000211911	9.28538291495436	3.44226031953932	1.16681169751848	2.95014210678567	0.00317627799271307	0.0329049601332347	IGHD3-22	IG_D_gene	ENST00000390571	ENST00000390571	NA	NA	NA	immunoglobulin heavy diversity 3-22 [Source:HGNC Symbol;Acc:HGNC:5497]
ENSG00000206596	2.69789254988303	3.43724507732106	1.28387111721369	2.67725087918536	0.00742290304248879	0.056431562972576	RNU1-27P	snRNA	ENST00000383869	ENST00000383869	124904613	NA	NA	RNA, U1 small nuclear 27, pseudogene [Source:HGNC Symbol;Acc:HGNC:37497]
ENSG00000221866	773.002840308779	3.43047062534556	0.849584204990415	4.03782297881146	5.3949538528548e-05	0.00238911828954364	PLXNA4	protein_coding	ENST00000321063	ENST00000321063	91584	GO:0002116	BP	plexin A4 [Source:HGNC Symbol;Acc:HGNC:9102]
ENSG00000228481	49.4074147495463	3.42385939049572	0.664541614136761	5.15221216799689	2.57431547954679e-07	6.58105220325693e-05	PRKCE-AS1	lncRNA	ENST00000423120	ENST00000423120	NA	NA	NA	PRKCE antisense RNA 1 [Source:HGNC Symbol;Acc:HGNC:40474]
ENSG00000288970	16.790640517459	3.42135900792066	1.2957332527915	2.64048097905164	0.00827884397375585	0.0603312145823924		lncRNA	ENST00000690431	ENST00000690431	NA	NA	NA	novel transcript
ENSG00000124507	175.577850172052	3.42115777028033	0.867270875354396	3.94473960500787	7.98867402649742e-05	0.00311564740309706	PACSIN1	protein_coding	ENST00000620693	ENST00000244458	29993	GO:0005515	BP	protein kinase C and casein kinase substrate in neurons 1 [Source:HGNC Symbol;Acc:HGNC:8570]
ENSG00000260386	23.0785993286767	3.42035548005986	1.1470363059903	2.98190690407734	0.00286459092719175	0.0309461458131542	LDC1P	transcribed_unitary_pseudogene	ENST00000562339	ENST00000563550	149086	NA	NA	leucine decarboxylase 1, pseudogene [Source:HGNC Symbol;Acc:HGNC:49677]
ENSG00000263711	2.65924626693767	3.41892617875029	1.42514656992312	2.39899968950895	0.0164399286322164	0.0926646796215524	LINC02864	lncRNA	ENST00000584544	ENST00000584544	400655	NA	NA	long intergenic non-protein coding RNA 2864 [Source:HGNC Symbol;Acc:HGNC:54480]
ENSG00000251476	2.61425276680603	3.41520028329662	1.16907929300482	2.92127343605473	0.00348603722902146	0.0347795254853449	MTCO1P31	processed_pseudogene	ENST00000506355	ENST00000506355	NA	NA	NA	MT-CO1 pseudogene 31 [Source:HGNC Symbol;Acc:HGNC:52096]
ENSG00000181609	2.62020617138071	3.41314007501301	1.30250297418139	2.62044704900434	0.00878145662021332	0.0625679429853977	OR52D1	protein_coding	ENST00000322641	ENST00000322641	390066	GO:0004930	BP	olfactory receptor family 52 subfamily D member 1 [Source:HGNC Symbol;Acc:HGNC:15212]
ENSG00000230778	51.6271569027864	3.41279382167716	0.700550761531933	4.87158677012101	1.10705523934398e-06	0.000166685617203891	ANKRD63	protein_coding	ENST00000434396	ENST00000434396	100131244	NA	NA	ankyrin repeat domain 63 [Source:HGNC Symbol;Acc:HGNC:40027]
ENSG00000259222	2.64273537631207	3.41095003947006	1.30838459003484	2.60699343713552	0.00913411109790221	0.0638907228396455		lncRNA	ENST00000559870	ENST00000559870	NA	NA	NA	novel transcript
ENSG00000214940	8.56058280650074	3.41031349278944	1.01292056415998	3.36681237745194	0.000760424051333579	0.0132875645643086	NPIPA8	protein_coding	ENST00000525596	ENST00000525596	101059953	NA	NA	nuclear pore complex interacting protein family member A8 [Source:HGNC Symbol;Acc:HGNC:41983]
ENSG00000230176	15.3011682982387	3.40485253849714	0.637403993543961	5.34174961717165	9.20537453049948e-08	3.16026566125406e-05	LINC01433	lncRNA	ENST00000658198	ENST00000658198	NA	NA	NA	long intergenic non-protein coding RNA 1433 [Source:HGNC Symbol;Acc:HGNC:50746]
ENSG00000222123	3.78015989702365	3.40123794329884	1.18948398777675	2.85942305928475	0.00424412359010202	0.0394966907164374	RNA5SP390	rRNA_pseudogene	ENST00000410191	ENST00000410191	NA	NA	NA	RNA, 5S ribosomal pseudogene 390 [Source:HGNC Symbol;Acc:HGNC:43290]
ENSG00000254499	4.93055232930527	3.39626134257261	1.07413075415785	3.16186956702061	0.00156759762535792	0.0213722993051541		lncRNA	ENST00000532913	ENST00000532913	NA	NA	NA	novel transcript
ENSG00000286714	4.15070550511525	3.39511701522216	1.34886052799972	2.51702599694048	0.0118350096291054	0.0753337868517445		lncRNA	ENST00000663884	ENST00000663884	NA	NA	NA	novel transcript
ENSG00000130147	1191.74408004694	3.39338859457396	0.92371747776371	3.6736217255402	0.000239136676139738	0.00645847752540029	SH3BP4	protein_coding	ENST00000392011	ENST00000392011	23677	GO:0005092	BP	SH3 domain binding protein 4 [Source:HGNC Symbol;Acc:HGNC:10826]
ENSG00000289834	2.63277057273896	3.3914682900381	1.39292488534071	2.43478189364716	0.0149007683059291	0.0871816208972836		lncRNA	ENST00000700828	ENST00000700828	NA	NA	NA	novel transcript
ENSG00000283699	4.76937836079888	3.38917136987904	1.05707024187192	3.20619315124916	0.00134503671507608	0.0193951503335951	MIR4481	miRNA	ENST00000637781	ENST00000637781	100616320	GO:1903561	CC	microRNA 4481 [Source:HGNC Symbol;Acc:HGNC:41781]
ENSG00000204832	920.950152964097	3.38567957750904	0.842012980252591	4.02093513628898	5.79675662304602e-05	0.00251768746791335	ST8SIA6-AS1	lncRNA	ENST00000457649	ENST00000657045	100128098	NA	NA	ST8SIA6 antisense RNA 1 [Source:HGNC Symbol;Acc:HGNC:44880]
ENSG00000256083	37.6165200603326	3.38093549035957	1.25561432386183	2.69265444500584	0.00708856956223157	0.0549683583048927		lncRNA	ENST00000544279	ENST00000544279	NA	NA	NA	novel transcript, antisense to HMGA2
ENSG00000291038	48.3226059145627	3.37878657800833	0.96018743061425	3.5188823247216	0.000433368885239235	0.0093998907785144		lncRNA	ENST00000687238	ENST00000700970	NA	NA	NA	novel transcript
ENSG00000258379	3.69501546224721	3.37265756728603	1.09049399196748	3.09277959542083	0.00198291345223089	0.0247533165087501		lncRNA	ENST00000555889	ENST00000555889	NA	NA	NA	novel transcript
ENSG00000145113	36.8688019358002	3.37178365927831	1.053249522754	3.2013151550849	0.00136801816321172	0.0196013895106339	MUC4	protein_coding	ENST00000308466	ENST00000463781	4585	GO:0005176	BP	mucin 4, cell surface associated [Source:HGNC Symbol;Acc:HGNC:7514]
ENSG00000158488	101.117384648867	3.36293736863595	1.19877742488775	2.80530588816423	0.00502688492058771	0.0438136790859521	CD1E	protein_coding	ENST00000444681	ENST00000368167	913	GO:0000139	CC	CD1e molecule [Source:HGNC Symbol;Acc:HGNC:1638]
ENSG00000179455	176.581439230349	3.36137429331377	1.39777046678285	2.40481135722548	0.0161808159228047	0.0916473298097918	MKRN3	protein_coding	ENST00000314520	ENST00000314520	7681	GO:0000209	BP	makorin ring finger protein 3 [Source:HGNC Symbol;Acc:HGNC:7114]
ENSG00000171502	3123.75766490014	3.36042973471305	0.629043931747833	5.3421224895627	9.18645433079669e-08	3.16026566125406e-05	COL24A1	protein_coding	ENST00000370571	ENST00000370571	255631	GO:0005515	MF	collagen type XXIV alpha 1 chain [Source:HGNC Symbol;Acc:HGNC:20821]
ENSG00000280916	9.98111038679324	3.35857914730631	0.969680196547447	3.46359465653166	0.00053300902749476	0.0106885761473644	FOXCUT	lncRNA	ENST00000652712	ENST00000652712	NA	NA	NA	FOXC1 upstream transcript [Source:HGNC Symbol;Acc:HGNC:50650]
ENSG00000211921	53.2681291074104	3.35806469753805	1.03010940289137	3.25991073192075	0.00111447284585142	0.0170936293538569	IGHD5-12	IG_D_gene	ENST00000390581	ENST00000390581	NA	NA	NA	immunoglobulin heavy diversity 5-12 [Source:HGNC Symbol;Acc:HGNC:5508]
ENSG00000252118	7.31360327579109	3.35753892929945	0.864211683433177	3.8850885652937	0.000102292591135014	0.00364550127319234	RNU6ATAC39P	snRNA	ENST00000516309	ENST00000516309	NA	NA	NA	RNA, U6atac small nuclear 39, pseudogene [Source:HGNC Symbol;Acc:HGNC:46938]
ENSG00000201519	19.7550896694238	3.35183089573482	0.719540179649729	4.65829565955092	3.18838073657529e-06	0.000343320567732349	RNU6-645P	snRNA	ENST00000364649	ENST00000364649	NA	NA	NA	RNA, U6 small nuclear 645, pseudogene [Source:HGNC Symbol;Acc:HGNC:47608]
ENSG00000263642	7.169378367055	3.35149908274823	1.09568878319925	3.05880568838384	0.00222221234288988	0.0264324770318199	MIR4802	miRNA	ENST00000581881	ENST00000581881	100616274	NA	NA	microRNA 4802 [Source:HGNC Symbol;Acc:HGNC:41658]
ENSG00000260792	4.98215127199121	3.34471858677039	0.985470408348536	3.39403249294468	0.000688715204541046	0.0125630553413908	LINC02280	lncRNA	ENST00000564585	ENST00000564585	101929634	NA	NA	long intergenic non-protein coding RNA 2280 [Source:HGNC Symbol;Acc:HGNC:53196]
ENSG00000227800	11.2419888712388	3.3440398608638	1.12159553982109	2.98150245978797	0.00286837742411075	0.0309672073340488	IGHD4-17	IG_D_gene	ENST00000431870	ENST00000431870	NA	NA	NA	immunoglobulin heavy diversity 4-17 [Source:HGNC Symbol;Acc:HGNC:5503]
ENSG00000066382	366.089394942861	3.3388914355524	1.17114495762192	2.8509634215838	0.00435869833234371	0.0402211243456518	MPPED2	protein_coding	ENST00000448418	ENST00000358117	744	GO:0005515	MF	metallophosphoesterase domain containing 2 [Source:HGNC Symbol;Acc:HGNC:1180]
ENSG00000105855	356.536543193337	3.33848843527227	0.599100237357979	5.57250394357202	2.51103805819133e-08	1.22620096311894e-05	ITGB8	protein_coding	ENST00000537992	ENST00000222573	3696	GO:0001570	BP	integrin subunit beta 8 [Source:HGNC Symbol;Acc:HGNC:6163]
ENSG00000290729	18.0856667446745	3.33581514828305	1.00913661431715	3.30561303688332	0.000947688694421236	0.0153636961245428		lncRNA	ENST00000434037	ENST00000434037	NA	NA	NA	novel transcript
ENSG00000143839	5.99223421777066	3.33568443304888	1.24669532244117	2.67562119870414	0.00745908981475013	0.0566382999676005	REN	protein_coding	ENST00000272190	ENST00000272190	5972	GO:0001822	BP	renin [Source:HGNC Symbol;Acc:HGNC:9958]
ENSG00000105695	13.2381050268077	3.33432837476504	1.07511340956594	3.10137362728202	0.00192625072700584	0.0243041188097356	MAG	protein_coding	ENST00000600291	ENST00000392213	4099	GO:0005102	BP	myelin associated glycoprotein [Source:HGNC Symbol;Acc:HGNC:6783]
ENSG00000204930	22.8230323472756	3.33077580575923	0.888736465071568	3.74776543628264	0.000178416984876618	0.0053195347900177	FAM221B	protein_coding	ENST00000423537	ENST00000423537	392307	GO:0005515	MF	family with sequence similarity 221 member B [Source:HGNC Symbol;Acc:HGNC:30762]
ENSG00000243349	3.64848825856378	3.33028573698633	1.25846472294505	2.64630837580638	0.00813755954795071	0.0597680593139729		lncRNA	ENST00000427229	ENST00000427229	NA	NA	NA	novel transcript
ENSG00000106006	180.720340680239	3.32409987458843	1.0332429687609	3.2171521850033	0.00129469903056201	0.0189260696474064	HOXA6	protein_coding	ENST00000222728	ENST00000222728	3203	GO:0000785	CC	homeobox A6 [Source:HGNC Symbol;Acc:HGNC:5107]
ENSG00000069188	1810.01827998933	3.32224187027412	0.843607394267064	3.93813744740884	8.21165538792024e-05	0.0031702604604475	SDK2	protein_coding	ENST00000392650	ENST00000392650	54549	GO:0005515	BP	sidekick cell adhesion molecule 2 [Source:HGNC Symbol;Acc:HGNC:19308]
ENSG00000057593	11.8813223251928	3.3168296881396	0.974042065346762	3.40522222411288	0.000661102322238975	0.0122393390323094	F7	protein_coding	ENST00000541084	ENST00000346342	2155	GO:0001666	BP	coagulation factor VII [Source:HGNC Symbol;Acc:HGNC:3544]
ENSG00000230638	22.7379584656718	3.31669429145289	0.750406256233763	4.41986492503294	9.87626131939641e-06	0.000749164964629848		processed_pseudogene	ENST00000434240	ENST00000434240	NA	NA	NA	novel pseudogene
ENSG00000179097	4834.2624607839	3.31427822433877	0.933804010278738	3.54922252191813	0.000386370428829511	0.00874090754100816	HTR1F	protein_coding	ENST00000319595	ENST00000319595	3355	GO:0004993	MF	5-hydroxytryptamine receptor 1F [Source:HGNC Symbol;Acc:HGNC:5292]
ENSG00000170967	6.66031096767683	3.31226676061657	1.09847640479223	3.01532809095073	0.00256701410899274	0.0289212390772903	DDI1	protein_coding	ENST00000302259	ENST00000302259	414301	GO:0004190	MF	DNA damage inducible 1 homolog 1 [Source:HGNC Symbol;Acc:HGNC:18961]
ENSG00000263489	7.60686863715209	3.30963735000384	0.988265107906937	3.34893676152685	0.00081122309148564	0.0138864792202393		lncRNA	ENST00000577329	ENST00000577329	NA	NA	NA	novel transcript
ENSG00000144847	176.860572244073	3.29756757221149	0.911940013007815	3.61599175951855	0.000299199893407815	0.00747193320537996	IGSF11	protein_coding	ENST00000425327	ENST00000393775	152404	GO:0005515	BP	immunoglobulin superfamily member 11 [Source:HGNC Symbol;Acc:HGNC:16669]
ENSG00000230731	11.5424782346458	3.29225879200551	0.843145698243631	3.90473295287358	9.43294898932291e-05	0.00348180842367899	LINC02938	lncRNA	ENST00000421190	ENST00000668811	NA	NA	NA	long intergenic non-protein coding RNA 2938 [Source:HGNC Symbol;Acc:HGNC:55952]
ENSG00000272801	213.892461387053	3.29169578648284	1.03654171678999	3.17565201010598	0.00149500171730891	0.0207782238679519		lncRNA	ENST00000498652	ENST00000498652	NA	NA	NA	novel transcript
ENSG00000285079	6.52988000043107	3.29098924487989	1.3629057664645	2.41468583218121	0.0157487870372632	0.0902327839509345		lncRNA	ENST00000646875	ENST00000646875	NA	NA	NA	novel transcript
ENSG00000196132	111.424230306989	3.29068668956794	0.801531440686025	4.10549920131825	4.03442677950712e-05	0.00199983602337818	MYT1	protein_coding	ENST00000644172	ENST00000328439	4661	GO:0000785	CC	myelin transcription factor 1 [Source:HGNC Symbol;Acc:HGNC:7622]
ENSG00000263381	7.23555052026972	3.28700151013771	0.955328603738876	3.44070249469486	0.000580206105000396	0.0112059475202001	MIR5584	miRNA	ENST00000581357	ENST00000581357	100847089	NA	NA	microRNA 5584 [Source:HGNC Symbol;Acc:HGNC:43507]
ENSG00000250591	4.73170986469934	3.28239493655702	1.09212119151713	3.00552261237349	0.00265124882118682	0.0294786238161253	PRSS3P1	unprocessed_pseudogene	ENST00000503996	ENST00000503996	NA	NA	NA	PRSS3 pseudogene 1 [Source:HGNC Symbol;Acc:HGNC:43787]
ENSG00000125363	4.9908396630956	3.27784378863531	1.23787511263807	2.64796000434148	0.00809791050972681	0.0595996353399135	AMELX	protein_coding	ENST00000380714	ENST00000380714	265	GO:0001649	BP	amelogenin X-linked [Source:HGNC Symbol;Acc:HGNC:461]
ENSG00000238149	3.40019634595848	3.27288481183593	1.11303166639279	2.94051365352701	0.0032766856033904	0.0334325204542231		processed_pseudogene	ENST00000449387	ENST00000449387	NA	NA	NA	ribosomal protein S15a (RPS15A) pseudogene
ENSG00000241175	6.7275809759429	3.26897351399348	1.29951503100095	2.51553343825162	0.0118852402340242	0.0755072153826823	RN7SL494P	misc_RNA	ENST00000461517	ENST00000461517	NA	NA	NA	RNA, 7SL, cytoplasmic 494, pseudogene [Source:HGNC Symbol;Acc:HGNC:46510]
ENSG00000179399	917.647552197603	3.26891851277512	1.06189636634589	3.07837809448754	0.00208130664159573	0.0254174034473482	GPC5	protein_coding	ENST00000377067	ENST00000377067	2262	GO:0005515	CC	glypican 5 [Source:HGNC Symbol;Acc:HGNC:4453]
ENSG00000264750	21.1348226260401	3.26261545316499	0.936087063427489	3.48537607305339	0.000491445806697609	0.010158131011461		lncRNA	ENST00000579100	ENST00000579100	NA	NA	NA	novel transcript, antisense to SDK2
ENSG00000181143	8.43769993258079	3.26187933911917	1.02779778666843	3.17365865292671	0.00150530608068711	0.0208732695823904	MUC16	protein_coding	ENST00000397910	ENST00000397910	94025	GO:0005515	MF	mucin 16, cell surface associated [Source:HGNC Symbol;Acc:HGNC:15582]
ENSG00000130612	3.38865643757443	3.25874319038342	0.967232288319689	3.36914227299486	0.000754024972361385	0.0132076812415177	CYP2G1P	transcribed_unprocessed_pseudogene	ENST00000597833	ENST00000597833	NA	NA	NA	cytochrome P450 family 2 subfamily G member 1, pseudogene [Source:HGNC Symbol;Acc:HGNC:2633]
ENSG00000226272	382.250376039066	3.25854120239799	0.788299026582393	4.13363595858431	3.57068905454419e-05	0.00183987937981914	ARHGAP26-AS1	lncRNA	ENST00000433595	ENST00000434610	100874239	NA	NA	ARHGAP26 antisense RNA 1 [Source:HGNC Symbol;Acc:HGNC:40792]
ENSG00000248624	22.7988554172013	3.2566469544674	1.03649050529879	3.1419940055588	0.00167801471286325	0.0223279850596833		lncRNA	ENST00000509750	ENST00000509750	NA	NA	NA	novel transcript
ENSG00000263952	31.8797102827983	3.25459423190708	0.987272863209941	3.29654987307699	0.000978802345931687	0.0156870419917309		lncRNA	ENST00000579321	ENST00000584321	NA	NA	NA	novel transcript, antisense to PIEZO2
ENSG00000138039	13.7403258380423	3.25404393163984	0.999875353412403	3.25444958767545	0.00113612322370752	0.0173154571117229	LHCGR	protein_coding	ENST00000294954	ENST00000294954	3973	GO:0001541	BP	luteinizing hormone/choriogonadotropin receptor [Source:HGNC Symbol;Acc:HGNC:6585]
ENSG00000266946	66.9046457451079	3.24987772631462	0.725411158545148	4.48004926314124	7.46258132971031e-06	0.00063052164218789	MRPL37P1	processed_pseudogene	ENST00000592451	ENST00000592451	NA	NA	NA	mitochondrial ribosomal protein L37 pseudogene 1 [Source:HGNC Symbol;Acc:HGNC:31003]
ENSG00000236318	49.7424693831264	3.24480840364903	0.609262186002226	5.32579975944408	1.00509809496521e-07	3.39441352894046e-05	LINC02888	lncRNA	ENST00000419463	ENST00000419463	NA	NA	NA	long intergenic non-protein coding RNA 2888 [Source:HGNC Symbol;Acc:HGNC:53765]
ENSG00000225476	6.34767114207735	3.2435449315413	1.3579792518657	2.3885084599673	0.0169169188389614	0.0944971843089702	MTCO3P5	processed_pseudogene	ENST00000433620	ENST00000433620	NA	NA	NA	MT-CO3 pseudogene 5 [Source:HGNC Symbol;Acc:HGNC:52123]
ENSG00000256273	8.35796479500373	3.24320340032615	0.881814808580468	3.67787359519059	0.000235186454363903	0.00638040368986035		lncRNA	ENST00000544089	ENST00000544089	NA	NA	NA	novel transcript
ENSG00000109991	60.2501179974943	3.23454523205669	1.17544355764691	2.75176567263837	0.0059274918144585	0.0489031607779161	P2RX3	protein_coding	ENST00000263314	ENST00000263314	5024	GO:0001614	MF	purinergic receptor P2X 3 [Source:HGNC Symbol;Acc:HGNC:8534]
ENSG00000237531	26.8169531234511	3.23439665190375	1.06140683273596	3.04727325295856	0.00230927678595874	0.0271552313496274		lncRNA	ENST00000420865	ENST00000420865	NA	NA	NA	novel transcript
ENSG00000173727	6.76074379503546	3.2295495986825	0.896036515379008	3.60426114700968	0.000313042181929443	0.0076848453031266	FAUP4	transcribed_unprocessed_pseudogene	ENST00000637245	ENST00000637245	NA	NA	NA	FAU pseudogene 4 [Source:HGNC Symbol;Acc:HGNC:56253]
ENSG00000274591	4.79637605398183	3.22722722642951	0.937127890587316	3.44374258715846	0.000573721648379471	0.0111462395085164		lncRNA	ENST00000611566	ENST00000611566	NA	NA	NA	novel transcript, sense intronic to SLC38A1
ENSG00000229847	326.636507289386	3.22294013209926	1.23364404149763	2.61253653702785	0.00898730852928797	0.0633688548320683	EMX2OS	lncRNA	ENST00000412075	ENST00000450314	196047	NA	NA	EMX2 opposite strand/antisense RNA [Source:HGNC Symbol;Acc:HGNC:18511]
ENSG00000266767	15.5819899236701	3.22236223479416	1.26526900102969	2.54678035435292	0.0108721840834955	0.0712250261133416		lncRNA	ENST00000579509	ENST00000579509	NA	NA	NA	novel transcript, antisense to PTPRM
ENSG00000283413	18.6477662712703	3.22005189603382	0.700371360598234	4.59763502220216	4.27313699601642e-06	0.000415091608838842		lncRNA	ENST00000637629	ENST00000637629	NA	NA	NA	novel transcript
ENSG00000175497	67.0271831275202	3.21811769493347	0.87979986049854	3.65778382041334	0.000254405477623058	0.00676546181403122	DPP10	protein_coding	ENST00000436732	ENST00000410059	57628	GO:0005886	MF	dipeptidyl peptidase like 10 [Source:HGNC Symbol;Acc:HGNC:20823]
ENSG00000246820	5.15768405158149	3.2151599551564	1.27352049823167	2.52462363944733	0.0115822254884391	0.0743401954263296	RIC3-DT	lncRNA	ENST00000499752	ENST00000499752	NA	NA	NA	RIC3 divergent transcript [Source:HGNC Symbol;Acc:HGNC:54191]
ENSG00000279020	19.081494868548	3.20110223606589	0.917379847851515	3.48939672433704	0.000484112082975844	0.0100594419115902	C18orf15	TEC	ENST00000623680	ENST00000623680	147276	GO:0016020	CC	chromosome 18 putative open reading frame 15 [Source:HGNC Symbol;Acc:HGNC:26447]
ENSG00000231718	34.2604510142856	3.19833846518295	0.967339166330812	3.3063258229422	0.000945280991280255	0.0153384256402799	LINC02789	lncRNA	ENST00000452199	ENST00000452199	400800	NA	NA	long intergenic non-protein coding RNA 2789 [Source:HGNC Symbol;Acc:HGNC:54310]
ENSG00000273433	918.782278083772	3.19483333276082	0.915779009108682	3.48865097472623	0.000485464583469169	0.0100704639427336		lncRNA	ENST00000467897	ENST00000467897	NA	NA	NA	novel transcript
ENSG00000180044	617.645747712003	3.19068011819276	1.03008561888705	3.09749020828008	0.00195166843711892	0.0245135525351857	C3orf80	protein_coding	ENST00000326474	ENST00000326474	401097	GO:0016020	CC	chromosome 3 open reading frame 80 [Source:HGNC Symbol;Acc:HGNC:40048]
ENSG00000198125	5.43564924391495	3.18835390592527	1.22033379561066	2.61269000120562	0.00898327435446365	0.0633688548320683	MB	protein_coding	ENST00000401702	ENST00000397326	4151	GO:0001666	BP	myoglobin [Source:HGNC Symbol;Acc:HGNC:6915]
ENSG00000262151	843.022305808071	3.18717366110689	0.549838653596976	5.79656166451158	6.76883032631763e-09	4.89196905343628e-06		lncRNA	ENST00000572017	ENST00000572017	NA	NA	NA	novel transcript, antisense to CIITA
ENSG00000211925	13.1185326314623	3.18553109204423	1.30401281133659	2.44286794144232	0.0145710680261176	0.0858956140606502	IGHD2-8	IG_D_gene	ENST00000390585	ENST00000390585	NA	NA	NA	immunoglobulin heavy diversity 2-8 [Source:HGNC Symbol;Acc:HGNC:5492]
ENSG00000288780	35.765174320532	3.18054359452361	0.953427621787641	3.33590460549088	0.000850223329047596	0.0143369812284422		lncRNA	ENST00000690049	ENST00000690049	NA	NA	NA	novel transcript, sense intronic to HTR1F
ENSG00000229740	17.31918991564	3.18022016778167	0.941703133971631	3.37709417443383	0.000732559642520771	0.0129500826922924		lncRNA	ENST00000650800	ENST00000659736	NA	NA	NA	novel transcript
ENSG00000099985	1129.69833716735	3.17996381321452	0.700358681628172	4.54047889550229	5.61265970797007e-06	0.000521117135188853	OSM	protein_coding	ENST00000215781	ENST00000215781	5008	GO:0002675	BP	oncostatin M [Source:HGNC Symbol;Acc:HGNC:8506]
ENSG00000225929	9.90644155170736	3.17966752064203	0.724510026080302	4.38871431199436	1.1402273683224e-05	0.000814293600428818		lncRNA	ENST00000449652	ENST00000449652	105373100	NA	NA	novel transcript
ENSG00000262898	335.418903829757	3.17809899943137	0.646086106551804	4.91900223082192	8.69864783354266e-07	0.000140435673705665		lncRNA	ENST00000651869	ENST00000652318	NA	NA	NA	novel transcript
ENSG00000224852	8.13679112402918	3.17737370776426	1.12843329558475	2.81573906069277	0.00486651753824058	0.0429127568965011	MTND5P24	processed_pseudogene	ENST00000438892	ENST00000438892	NA	NA	NA	MT-ND5 pseudogene 24 [Source:HGNC Symbol;Acc:HGNC:42286]
ENSG00000142549	42.3051828909726	3.1763462982881	0.751909790623472	4.22437151091532	2.39608507481329e-05	0.00138980626426089	IGLON5	protein_coding	ENST00000270642	ENST00000270642	402665	GO:0005576	CC	IgLON family member 5 [Source:HGNC Symbol;Acc:HGNC:34550]
ENSG00000215182	5.77597985229484	3.1751527570047	1.07787882708744	2.94574183777628	0.00322181179111518	0.0331313007637274	MUC5AC	protein_coding	ENST00000621226	ENST00000621226	4586	GO:0005201	MF	mucin 5AC, oligomeric mucus/gel-forming [Source:HGNC Symbol;Acc:HGNC:7515]
ENSG00000280399	42.7387782257577	3.1745567631725	0.746168543375963	4.25447680869733	2.09538374513075e-05	0.00126408659455835		TEC	ENST00000624916	ENST00000624916	NA	NA	NA	TEC
ENSG00000138271	145.991083875365	3.1704233407263	0.518627078205146	6.11310799987234	9.7709195906617e-10	1.4123278013126e-06	GPR87	protein_coding	ENST00000629077	ENST00000260843	53836	GO:0005886	MF	G protein-coupled receptor 87 [Source:HGNC Symbol;Acc:HGNC:4538]
ENSG00000231131	3838.62976335899	3.16980276994456	0.793114229924542	3.99665350884719	6.42442272105678e-05	0.00268384901096078	LNCAROD	lncRNA	ENST00000435813	ENST00000647908	101928687	NA	NA	lncRNA activating regulator of DKK1 [Source:HGNC Symbol;Acc:HGNC:50913]
ENSG00000244618	26.9207183837842	3.16860841456637	0.668163599352722	4.74226434609119	2.11342601001006e-06	0.000260651065862538	RN7SL334P	misc_RNA	ENST00000465067	ENST00000465067	NA	NA	NA	RNA, 7SL, cytoplasmic 334, pseudogene [Source:HGNC Symbol;Acc:HGNC:46350]
ENSG00000182585	706.732475114669	3.16756159411053	0.806509857757871	3.92749271895632	8.58360186421722e-05	0.00326288042829279	EPGN	protein_coding	ENST00000413830	ENST00000413830	255324	GO:0000165	BP	epithelial mitogen [Source:HGNC Symbol;Acc:HGNC:17470]
ENSG00000227335	5.67215557553853	3.16622585763908	1.26769021056526	2.49763375251377	0.0125025290102489	0.0781105443143766	IGHJ1P	IG_J_pseudogene	ENST00000450690	ENST00000450690	NA	NA	NA	immunoglobulin heavy joining 1P (pseudogene) [Source:HGNC Symbol;Acc:HGNC:5533]
ENSG00000287470	207.70216061966	3.16411130001948	0.548153359064882	5.77231033559162	7.81919350285647e-09	5.33121464941927e-06		lncRNA	ENST00000656161	ENST00000656161	NA	NA	NA	novel transcript, antisense to ERG
ENSG00000251273	65.6771801963627	3.15779197404945	0.935302248153611	3.37622622022269	0.000734874691607026	0.0129665194608943	LINC02228	lncRNA	ENST00000641970	ENST00000641970	NA	NA	NA	long intergenic non-protein coding RNA 2228 [Source:HGNC Symbol;Acc:HGNC:53097]
ENSG00000287913	11.5172250318463	3.15646663350578	1.32809360759169	2.37668987747753	0.0174687680415725	0.0961833615648731		lncRNA	ENST00000659224	ENST00000659224	NA	NA	NA	novel transcript
ENSG00000221275	5.31169310016926	3.15616311150749	1.16083929314856	2.7188630933977	0.00655067152712871	0.0522088809669879	MIR548I2	miRNA	ENST00000408348	ENST00000408348	100302277	NA	NA	microRNA 548i-2 [Source:HGNC Symbol;Acc:HGNC:35353]
ENSG00000261678	3.02199643601744	3.15571400908812	1.11325847320601	2.83466426264888	0.00458738677138568	0.0414318414288604	SCRT1	protein_coding	ENST00000569446	ENST00000569446	83482	GO:0000122	BP	scratch family transcriptional repressor 1 [Source:HGNC Symbol;Acc:HGNC:15950]
ENSG00000013588	5.50264381261579	3.15380123145273	1.01044528072139	3.12119942724769	0.00180116012769093	0.0233035167827567	GPRC5A	protein_coding	ENST00000537783	ENST00000014914	9052	GO:0004930	BP	G protein-coupled receptor class C group 5 member A [Source:HGNC Symbol;Acc:HGNC:9836]
ENSG00000234265	3.15012349971774	3.14857631523234	1.20583735989646	2.61111192930918	0.00902483505355858	0.0634848042622917	LINC01723	lncRNA	ENST00000432244	ENST00000669657	100505515	NA	NA	long intergenic non-protein coding RNA 1723 [Source:HGNC Symbol;Acc:HGNC:52511]
ENSG00000105929	5.05503616549571	3.1481857669257	1.00757535419799	3.12451644813363	0.00178097564459164	0.0231334780348538	ATP6V0A4	protein_coding	ENST00000310018	ENST00000310018	50617	GO:0000220	CC	ATPase H+ transporting V0 subunit a4 [Source:HGNC Symbol;Acc:HGNC:866]
ENSG00000154864	1235.40937392461	3.14766245176525	1.02516769907437	3.07038785420892	0.00213780953822882	0.0258453949392562	PIEZO2	protein_coding	ENST00000582937	ENST00000674853	63895	GO:0005261	BP	piezo type mechanosensitive ion channel component 2 [Source:HGNC Symbol;Acc:HGNC:26270]
ENSG00000269952	5.50919466698904	3.14521639308729	0.918537151567461	3.42415806232775	0.000616707398875596	0.0116677165265804		lncRNA	ENST00000602435	ENST00000602435	NA	NA	NA	novel transcript, sense intronic to CREM
ENSG00000100312	17.8365466194955	3.14240561688656	0.752820236009979	4.17417793328938	2.99063958619245e-05	0.00162023616321814	ACR	protein_coding	ENST00000533930	ENST00000216139	49	GO:0002020	BP	acrosin [Source:HGNC Symbol;Acc:HGNC:126]
ENSG00000237088	7.13306207231954	3.14082160573077	1.18691061988802	2.64621577488884	0.00813978766356899	0.0597722753527188	RPL7AP48	processed_pseudogene	ENST00000444895	ENST00000444895	NA	NA	NA	ribosomal protein L7a pseudogene 48 [Source:HGNC Symbol;Acc:HGNC:35953]
ENSG00000233655	9.74200703861723	3.14008580417546	1.07693374101055	2.91576508804427	0.00354817542367868	0.0351424513962912	IGHD4-4	IG_D_gene	ENST00000414852	ENST00000414852	NA	NA	NA	immunoglobulin heavy diversity 4-4 [Source:HGNC Symbol;Acc:HGNC:5505]
ENSG00000287876	3.08208344500244	3.13142067509973	1.14402228015796	2.73720252604466	0.00619641325520262	0.0503663394763347		lncRNA	ENST00000662515	ENST00000662515	NA	NA	NA	novel transcript
ENSG00000174358	45.6521628678069	3.13105657753081	1.27743659127547	2.45104657163812	0.0142441522415105	0.0847844976773555	SLC6A19	protein_coding	ENST00000515652	ENST00000304460	340024	GO:0003333	BP	solute carrier family 6 member 19 [Source:HGNC Symbol;Acc:HGNC:27960]
ENSG00000143217	20.6657061059994	3.12785546424424	0.937634588324072	3.33590025708733	0.00085023662753353	0.0143369812284422	NECTIN4	protein_coding	ENST00000368012	ENST00000368012	81607	GO:0001618	MF	nectin cell adhesion molecule 4 [Source:HGNC Symbol;Acc:HGNC:19688]
ENSG00000262966	4.54631906538109	3.12719915858864	0.972663412471288	3.21508871259301	0.0013040421521466	0.0190163486819408		lncRNA	ENST00000574307	ENST00000574307	101928266	NA	NA	novel transcript, antisense to NTN1
ENSG00000227550	36.9871251368827	3.12523476811291	1.07278489077075	2.91319797193225	0.00357747719073412	0.0353308870632326	TRBV7-5	TR_V_pseudogene	ENST00000390382	ENST00000390382	NA	NA	NA	T cell receptor beta variable 7-5 (pseudogene) [Source:HGNC Symbol;Acc:HGNC:12239]
ENSG00000234308	17.4272966150958	3.11694398228621	0.661894643005065	4.70912405052107	2.48783631133868e-06	0.000290939977173251	LINC01878	lncRNA	ENST00000656101	ENST00000656101	102725079	NA	NA	long intergenic non-protein coding RNA 1878 [Source:HGNC Symbol;Acc:HGNC:52697]
ENSG00000286696	60.658069376156	3.11406513084316	0.56051574294699	5.55571394742729	2.76479333521164e-08	1.29751392157413e-05		lncRNA	ENST00000662636	ENST00000662636	NA	NA	NA	novel transcript, antisense to SEMA7A
ENSG00000287818	29.1871369322823	3.10730900228858	0.91548204643479	3.3941779791199	0.000688349410726869	0.0125627243969829		lncRNA	ENST00000657017	ENST00000660950	NA	NA	NA	novel transcript, antisense to PKIB
ENSG00000279281	167.069315104682	3.10729581470831	0.631677460286337	4.91911776193469	8.69351574203944e-07	0.000140435673705665		TEC	ENST00000623054	ENST00000623054	NA	NA	NA	TEC
ENSG00000220517	102.361309281572	3.10127436451228	0.59191496706424	5.2393916982601	1.61106760151802e-07	4.6949628103593e-05	ASS1P1	processed_pseudogene	ENST00000402854	ENST00000402854	NA	NA	NA	argininosuccinate synthetase 1 pseudogene 1 [Source:HGNC Symbol;Acc:HGNC:759]
ENSG00000198010	163.044892240945	3.09463972996338	0.821476440079855	3.76716796608622	0.000165109919268609	0.00505628139211057	DLGAP2	protein_coding	ENST00000637795	ENST00000637795	9228	GO:0005515	BP	DLG associated protein 2 [Source:HGNC Symbol;Acc:HGNC:2906]
ENSG00000175894	95.3318337243868	3.09261850896409	0.93814760891169	3.29651589961597	0.000978920735315284	0.0156870419917309	TSPEAR	protein_coding	ENST00000323084	ENST00000323084	54084	GO:0003674	BP	thrombospondin type laminin G domain and EAR repeats [Source:HGNC Symbol;Acc:HGNC:1268]
ENSG00000276140	3.13360598343358	3.08726630610817	1.29089059099483	2.39157859515341	0.0167760916764869	0.0939867495467774		misc_RNA	ENST00000620907	ENST00000620907	NA	NA	NA	NULL
ENSG00000224074	3.03704062139662	3.08529418273103	1.09657418349933	2.81357543261268	0.00489938897338119	0.0431184412913061	LINC00691	lncRNA	ENST00000436123	ENST00000436123	152024	NA	NA	long intergenic non-protein coding RNA 691 [Source:HGNC Symbol;Acc:HGNC:44514]
ENSG00000225913	6.97312646052916	3.08264297627335	0.906131135225301	3.40198328524147	0.000668987292623458	0.0123059462673813		lncRNA	ENST00000438082	ENST00000438082	NA	NA	NA	novel transcript
ENSG00000253471	20.4154141494438	3.08206201723598	1.04768246755956	2.94179020139112	0.00326320924972959	0.0333576603813942		lncRNA	ENST00000523874	ENST00000523874	NA	NA	NA	novel transcript
ENSG00000226622	43.233556674983	3.08168419358954	0.779017249838517	3.95586130374949	7.62593973617054e-05	0.00299859584664046		lncRNA	ENST00000444672	ENST00000664749	NA	NA	NA	novel transcript
ENSG00000230631	8.77254990416021	3.0792518539781	1.0193850993471	3.02069537405474	0.00252194946054141	0.0285773489200767		lncRNA	ENST00000455973	ENST00000455973	NA	NA	NA	novel transcript
ENSG00000244183	5.18604012634873	3.07902231594242	0.911909964263473	3.37645429549536	0.00073426570096697	0.0129621032584965	PPIAP71	processed_pseudogene	ENST00000483456	ENST00000483456	NA	NA	NA	peptidylprolyl isomerase A pseudogene 71 [Source:HGNC Symbol;Acc:HGNC:53695]
ENSG00000256817	5.2772624949082	3.0787791580157	1.235216069955	2.49250251263964	0.0126846433056439	0.0788393998095539	TPT1P12	processed_pseudogene	ENST00000448968	ENST00000448968	NA	NA	NA	TPT1 pseudogene 12 [Source:HGNC Symbol;Acc:HGNC:49303]
ENSG00000234300	11.3762973037372	3.07774937133482	1.17132153081813	2.62758712305503	0.008599281806352	0.0617167124834828	LINC00229	lncRNA	ENST00000443783	ENST00000443783	NA	NA	NA	long intergenic non-protein coding RNA 229 [Source:HGNC Symbol;Acc:HGNC:13240]
ENSG00000111344	29.5861937796396	3.07773955925909	0.832737122850191	3.69593173500538	0.00021908183838047	0.00608512014736101	RASAL1	protein_coding	ENST00000546530	ENST00000548055	8437	GO:0005096	BP	RAS protein activator like 1 [Source:HGNC Symbol;Acc:HGNC:9873]
ENSG00000250842	71.460282016671	3.07688895016256	0.804976032067915	3.82233610391889	0.000132193339676253	0.00429967463775074		lncRNA	ENST00000504620	ENST00000504620	NA	NA	NA	novel transcript
ENSG00000130368	13.4625880019943	3.07647122049004	1.0305126944323	2.98537925550237	0.00283226928990449	0.0307255728189698	MAS1	protein_coding	ENST00000674077	ENST00000674077	4142	GO:0001595	BP	MAS1 proto-oncogene, G protein-coupled receptor [Source:HGNC Symbol;Acc:HGNC:6899]
ENSG00000279555	185.086857374732	3.0762183782595	0.63299075827458	4.85981562613129	1.17495124110679e-06	0.000171201766325141		TEC	ENST00000623762	ENST00000623762	NA	NA	NA	TEC
ENSG00000267417	11.0009332212382	3.07483462773674	0.89184474373406	3.44772411267765	0.000565331174578387	0.011072524295157		lncRNA	ENST00000586630	ENST00000586630	NA	NA	NA	novel transcript, antisense to NFIX
ENSG00000206129	6.99572012977556	3.07228270528021	1.17746485485298	2.60923516537895	0.00907448566898929	0.0636976717433172		lncRNA	ENST00000382897	ENST00000382897	642484	NA	NA	novel transcript
ENSG00000259162	18.4421219596605	3.07019426968787	1.20607131556697	2.54561586040588	0.0109085157038976	0.0713983197746867		transcribed_unprocessed_pseudogene	ENST00000553568	ENST00000553568	NA	NA	NA	solute carrier family 12 (sodium/chloride transporters), member 3 (SLC12A3) pseudogene
ENSG00000235665	752.519963718441	3.06927846196017	0.619042743355911	4.95810425839291	7.11843622227306e-07	0.000124266575520802	LINC00298	lncRNA	ENST00000426969	ENST00000663636	339788	NA	NA	long intergenic non-protein coding RNA 298 [Source:HGNC Symbol;Acc:HGNC:49257]
ENSG00000225623	7.75049859852231	3.06794329906724	1.13405224468735	2.70529273535635	0.00682442206398391	0.0535520772430233	AGBL4-IT1	lncRNA	ENST00000457061	ENST00000457061	100874313	NA	NA	AGBL4 intronic transcript 1 [Source:HGNC Symbol;Acc:HGNC:41482]
ENSG00000105997	1478.37943839431	3.06698673087652	0.812083651053808	3.77668818587422	0.000158927491058334	0.00491274920178269	HOXA3	protein_coding	ENST00000396352	ENST00000612286	3200	GO:0000785	CC	homeobox A3 [Source:HGNC Symbol;Acc:HGNC:5104]
ENSG00000285639	647.682718567213	3.06168178166505	0.890970162756922	3.43634603003014	0.000589617383454643	0.0113189858074242		lncRNA	ENST00000650535	ENST00000650535	NA	NA	NA	novel transcript
ENSG00000201168	7.04567853596211	3.05954403232734	0.843705238646809	3.62631863852646	0.000287490570320371	0.00735421794359591	RNA5SP368	rRNA_pseudogene	ENST00000364298	ENST00000364298	NA	NA	NA	RNA, 5S ribosomal pseudogene 368 [Source:HGNC Symbol;Acc:HGNC:43268]
ENSG00000164929	1945.8521060111	3.05571423210454	0.765018767903826	3.99429969604183	6.48857485851148e-05	0.00269507058720886	BAALC	protein_coding	ENST00000309982	ENST00000309982	79870	GO:0005654	CC	BAALC binder of MAP3K1 and KLF4 [Source:HGNC Symbol;Acc:HGNC:14333]
ENSG00000146072	1707.14774344059	3.05383966389686	0.813035003564386	3.75609863106592	0.000172582700117173	0.00521097990706988	TNFRSF21	protein_coding	ENST00000296861	ENST00000296861	27242	GO:0001783	BP	TNF receptor superfamily member 21 [Source:HGNC Symbol;Acc:HGNC:13469]
ENSG00000235096	122.619991705325	3.05260383901829	0.602635026131184	5.06542717673664	4.07485534817583e-07	8.81096084842675e-05		lncRNA	ENST00000426386	ENST00000426386	NA	NA	NA	novel transcript, antisense to SMYD3
ENSG00000176641	256.496654087863	3.05246784933957	0.965841938184301	3.16042173016213	0.00157540926143504	0.0214179793345435	RNF152	protein_coding	ENST00000312828	ENST00000312828	220441	GO:0004842	BP	ring finger protein 152 [Source:HGNC Symbol;Acc:HGNC:26811]
ENSG00000231272	49.526492363431	3.05177209951871	0.719815775919542	4.23965714785865	2.23861432676744e-05	0.00132180665542595		lncRNA	ENST00000456078	ENST00000456078	NA	NA	NA	novel transcript
ENSG00000127955	895.420265180696	3.05134738156363	0.673653207840925	4.52955221774016	5.91088248761599e-06	0.000536775261977822	GNAI1	protein_coding	ENST00000650351	ENST00000649796	2770	GO:0000287	MF	G protein subunit alpha i1 [Source:HGNC Symbol;Acc:HGNC:4384]
ENSG00000084710	45.9373487106225	3.05083144529276	0.742765375867138	4.10739588087433	4.001450597569e-05	0.00198621454387024	EFR3B	protein_coding	ENST00000401432	ENST00000403714	22979	GO:0005515	MF	EFR3 homolog B [Source:HGNC Symbol;Acc:HGNC:29155]
ENSG00000228133	4.24367731041715	3.04786726718206	1.23902779573888	2.45988611205006	0.0138981110882551	0.0834810741830427		lncRNA	ENST00000572287	ENST00000670164	105371485	NA	NA	novel transcript, antisense to RTN4RL1
ENSG00000226048	8.64246768319381	3.04655700831821	0.697246248778226	4.36941326490698	1.24580808420234e-05	0.000857495636775921	YBX1P8	processed_pseudogene	ENST00000421881	ENST00000421881	NA	NA	NA	Y-box binding protein 1 pseudogene 8 [Source:HGNC Symbol;Acc:HGNC:42429]
ENSG00000156535	1858.22194669296	3.04540790129238	0.606692154824902	5.01969223942136	5.17543292852267e-07	0.000102704716306779	CD109	protein_coding	ENST00000287097	ENST00000287097	135228	GO:0001933	BP	CD109 molecule [Source:HGNC Symbol;Acc:HGNC:21685]
ENSG00000241956	48.4663285981583	3.044771625883	0.829161413002223	3.67210964974661	0.000240556421229154	0.00648135580470368	LINC03000	lncRNA	ENST00000517508	ENST00000519570	102546299	NA	NA	long intergenic non-protein coding RNA 3000 [Source:HGNC Symbol;Acc:HGNC:56116]
ENSG00000173482	1761.50065587037	3.04378718259643	0.97294874743713	3.12841471928933	0.00175752004814654	0.022930696813789	PTPRM	protein_coding	ENST00000580170	ENST00000580170	5797	GO:0001937	BP	protein tyrosine phosphatase receptor type M [Source:HGNC Symbol;Acc:HGNC:9675]
ENSG00000291156	56.7322529118785	3.04285540856177	0.787050248740471	3.8661513841477	0.000110566322199491	0.00383070433269494		lncRNA	ENST00000394517	ENST00000456409	100288175	NA	NA	novel transcript
ENSG00000242049	8.62422626957017	3.04236766898241	1.01346577465813	3.00194416531596	0.00268261373879193	0.0297176364392964	DNAJB8-AS1	lncRNA	ENST00000471626	ENST00000471626	285224	NA	NA	DNAJB8 antisense RNA 1 [Source:HGNC Symbol;Acc:HGNC:41029]
ENSG00000249781	5.73871419330635	3.04031021421539	1.03249650206321	2.94462035284383	0.0032335115955434	0.0331855083830038	LINC02112	lncRNA	ENST00000512976	ENST00000511616	285692	NA	NA	long intergenic non-protein coding RNA 2112 [Source:HGNC Symbol;Acc:HGNC:27756]
ENSG00000250141	9.65894099873247	3.04019747173164	0.876215481468271	3.46969157248534	0.000521056332074162	0.010554311443852	LINC02276	lncRNA	ENST00000508388	ENST00000508388	NA	NA	NA	long intergenic non-protein coding RNA 2276 [Source:HGNC Symbol;Acc:HGNC:53192]
ENSG00000258114	244.028143961726	3.03581217154165	1.03998280513539	2.91909842792684	0.00351045362499796	0.0349090485809856		lncRNA	ENST00000549104	ENST00000549104	NA	NA	NA	novel transcript
ENSG00000268240	70.9915866589261	3.03410205169339	0.743777671884647	4.07931316895454	4.51689543186427e-05	0.00215902821859586		lncRNA	ENST00000594927	ENST00000594927	NA	NA	NA	novel transcript
ENSG00000177098	21.8062411739859	3.03257738153121	0.758959951919741	3.99570145151994	6.45029798423854e-05	0.00268940931978802	SCN4B	protein_coding	ENST00000415030	ENST00000324727	6330	GO:0001518	BP	sodium voltage-gated channel beta subunit 4 [Source:HGNC Symbol;Acc:HGNC:10592]
ENSG00000226876	130.373277689631	3.02950933241087	0.572827388993466	5.28869497272839	1.23192128562535e-07	4.04697341612344e-05	SMYD3-AS1	lncRNA	ENST00000443763	ENST00000443763	NA	NA	NA	SMYD3 antisense RNA 1 [Source:HGNC Symbol;Acc:HGNC:40708]
ENSG00000258481	5.08221518427182	3.02946456457864	1.08001548891945	2.80501955357103	0.00503135274132466	0.043828617654166		lncRNA	ENST00000553537	ENST00000553537	NA	NA	NA	novel transcript
ENSG00000286926	6.76365372876729	3.0245730638374	1.26966134279825	2.38218882617268	0.0172100701567644	0.0953400421868525		lncRNA	ENST00000654841	ENST00000654841	NA	NA	NA	novel transcript, antisense to LDLRAD4
ENSG00000231652	19.5392111935723	3.02190531911929	0.844991191044033	3.57625659432681	0.000348549546422781	0.00818932796458622	CD109-AS1	lncRNA	ENST00000428865	ENST00000428865	101928489	NA	NA	CD109 antisense RNA 1 [Source:HGNC Symbol;Acc:HGNC:55765]
ENSG00000197576	81.0728644545468	3.02138848818955	0.782577593527997	3.86081650327937	0.000113008750877146	0.00388552257059614	HOXA4	protein_coding	ENST00000610970	ENST00000360046	3201	GO:0000785	CC	homeobox A4 [Source:HGNC Symbol;Acc:HGNC:5105]
ENSG00000260555	15.4637912927298	3.01931606136126	0.878812004503165	3.43567912806133	0.000591070572797471	0.0113189858074242		lncRNA	ENST00000565102	ENST00000565102	NA	NA	NA	novel transcript
ENSG00000266378	14.7826404723347	3.01565996001456	0.850273615584505	3.54669356397882	0.000390098053500216	0.00879063757920892		lncRNA	ENST00000584683	ENST00000584683	NA	NA	NA	novel transcript
ENSG00000158220	80.2724134351171	3.01370110231752	0.805573839985289	3.74106128169772	0.000183244829065937	0.0054187685295636	ESYT3	protein_coding	ENST00000486831	ENST00000389567	83850	GO:0005509	MF	extended synaptotagmin 3 [Source:HGNC Symbol;Acc:HGNC:24295]
ENSG00000130037	11.0034693204215	3.01299891631166	0.968884178624758	3.10976170607753	0.00187238332493248	0.0238998388660403	KCNA5	protein_coding	ENST00000252321	ENST00000252321	3741	GO:0001666	BP	potassium voltage-gated channel subfamily A member 5 [Source:HGNC Symbol;Acc:HGNC:6224]
ENSG00000163424	22.4298408667392	3.01153164255583	1.02936036507621	2.92563396137063	0.00343755139485182	0.0344957948359804	TEX55	protein_coding	ENST00000295622	ENST00000295622	152405	GO:0005515	MF	testis expressed 55 [Source:HGNC Symbol;Acc:HGNC:26553]
ENSG00000184304	111.017066015758	3.01038935863126	0.965418116106181	3.11822339814075	0.00181944835245393	0.0234491895412702	PRKD1	protein_coding	ENST00000331968	ENST00000331968	5587	GO:0000421	MF	protein kinase D1 [Source:HGNC Symbol;Acc:HGNC:9407]
ENSG00000289256	6.13620615913017	3.0096334565819	1.00387011995081	2.9980307180867	0.00271730283252854	0.0299732769097226		lncRNA	ENST00000689338	ENST00000689338	NA	NA	NA	novel transcript
ENSG00000275458	4.05578249563157	3.00836686834214	1.03392509773463	2.90965648762527	0.0036182619927045	0.0355684209380767	MIR6809	miRNA	ENST00000612189	ENST00000612189	102465485	NA	NA	microRNA 6809 [Source:HGNC Symbol;Acc:HGNC:49926]
ENSG00000124678	10.2689530576372	3.00476653365227	0.837006028192127	3.58989831906271	0.00033080697742276	0.00792249399552275	TCP11	protein_coding	ENST00000412155	ENST00000311875	6954	GO:0001669	BP	t-complex 11 [Source:HGNC Symbol;Acc:HGNC:11658]
ENSG00000242120	3.79828560889005	3.00418400265501	1.03545981056159	2.901304301734	0.00371612813820502	0.0362249814950571	MDFIC2	protein_coding	ENST00000567252	ENST00000567252	107986096	NA	NA	MyoD family inhibitor domain containing 2 [Source:HGNC Symbol;Acc:HGNC:53442]
ENSG00000148680	438.820221011733	2.99958129641343	0.981908900145683	3.0548468355551	0.00225175485371371	0.0266784961946881	HTR7	protein_coding	ENST00000277874	ENST00000336152	3363	GO:0004993	BP	5-hydroxytryptamine receptor 7 [Source:HGNC Symbol;Acc:HGNC:5302]
ENSG00000286553	2.80743115743735	2.9983232050261	1.23679520731671	2.42426813047821	0.015339275312937	0.088659637349375		lncRNA	ENST00000657099	ENST00000657099	NA	NA	NA	novel transcript, antisense to CNKSR3
ENSG00000128342	82.8320675872096	2.99708717044769	1.02688845843958	2.91861024030004	0.00351595530347456	0.0349237385504004	LIF	protein_coding	ENST00000249075	ENST00000249075	3976	GO:0000902	BP	LIF interleukin 6 family cytokine [Source:HGNC Symbol;Acc:HGNC:6596]
ENSG00000280028	39.1163136713565	2.99207870213218	0.69305846863432	4.3172096403758	1.58014066818631e-05	0.00101964219974251		TEC	ENST00000623221	ENST00000623221	NA	NA	NA	TEC
ENSG00000132514	267.570656751887	2.98783502393908	1.18316081910658	2.52529916110241	0.0115599835655192	0.0742791438354298	CLEC10A	protein_coding	ENST00000416562	ENST00000416562	10462	GO:0002250	BP	C-type lectin domain containing 10A [Source:HGNC Symbol;Acc:HGNC:16916]
ENSG00000138109	2.90762960817603	2.98361449561962	1.16659255838923	2.55754631226111	0.0105413520404874	0.0698683597459746	CYP2C9	protein_coding	ENST00000461906	ENST00000260682	1559	GO:0004497	BP	cytochrome P450 family 2 subfamily C member 9 [Source:HGNC Symbol;Acc:HGNC:2623]
ENSG00000176049	1001.11700770274	2.98281302176253	0.677024355111632	4.40576915622291	1.05409173658798e-05	0.000774200386043559	JAKMIP2	protein_coding	ENST00000507386	ENST00000616793	9832	GO:0005515	MF	janus kinase and microtubule interacting protein 2 [Source:HGNC Symbol;Acc:HGNC:29067]
ENSG00000260694	2.89810712850531	2.98030274413729	1.07152114486735	2.78137557845976	0.00541290749592743	0.0460779329264625		lncRNA	ENST00000567386	ENST00000567386	NA	NA	NA	novel transcript, antisense to WWOX
ENSG00000176302	3.65551494252493	2.96872431287762	0.93432926736776	3.17738554978724	0.00148609331722191	0.0207065508019647	FOXR1	protein_coding	ENST00000531539	ENST00000317011	283150	GO:0000122	BP	forkhead box R1 [Source:HGNC Symbol;Acc:HGNC:29980]
ENSG00000228215	30.766833320097	2.96740108613138	0.844301994094248	3.51462048755997	0.000440382846502389	0.009472425322149	LINC02770	lncRNA	ENST00000430776	ENST00000664489	NA	NA	NA	long intergenic non-protein coding RNA 2770 [Source:HGNC Symbol;Acc:HGNC:54290]
ENSG00000287203	5.91635075203388	2.96695638969489	0.848695959891517	3.495900216226	0.000472465343826891	0.00990313669636226		lncRNA	ENST00000666936	ENST00000666936	NA	NA	NA	novel transcript
ENSG00000229690	2.72225709655167	2.96689850528177	1.17524816231453	2.5244868279043	0.011586734705186	0.0743528396270164	MTCO2P1	processed_pseudogene	ENST00000424648	ENST00000424648	NA	NA	NA	MT-CO2 pseudogene 1 [Source:HGNC Symbol;Acc:HGNC:16564]
ENSG00000234999	6.33138878379987	2.96596862075085	0.851159341269995	3.48462206421349	0.000492832613374096	0.0101743801765111	SNRPCP19	processed_pseudogene	ENST00000420809	ENST00000420809	NA	NA	NA	small nuclear ribonucleoprotein polypeptide C pseudogene 19 [Source:HGNC Symbol;Acc:HGNC:49834]
ENSG00000108551	178.818688817371	2.96442271397186	0.839769139865752	3.53004483404304	0.000415489252226964	0.00911604105553951	RASD1	protein_coding	ENST00000225688	ENST00000225688	51655	GO:0003924	MF	ras related dexamethasone induced 1 [Source:HGNC Symbol;Acc:HGNC:15828]
ENSG00000200389	7.60231120850272	2.96387448774955	0.909369095172763	3.25926458627503	0.00111701440542322	0.0171238438352632	RNU6-509P	snRNA	ENST00000363519	ENST00000363519	NA	NA	NA	RNA, U6 small nuclear 509, pseudogene [Source:HGNC Symbol;Acc:HGNC:47472]
ENSG00000271133	34.2767992682911	2.96133485755643	0.989047201826881	2.99412894762405	0.00275229597869532	0.0302025409918415	ITGB8-AS1	lncRNA	ENST00000605357	ENST00000688475	101927811	NA	NA	ITGB8 antisense RNA 1 [Source:HGNC Symbol;Acc:HGNC:55257]
ENSG00000253326	8.75375252830232	2.96035227051343	0.89192848546676	3.31904667106156	0.000903253316694179	0.0148430931569172		processed_pseudogene	ENST00000517560	ENST00000517560	NA	NA	NA	novel pseudogene
ENSG00000232271	6.54056302103187	2.95992379239747	0.799798569165561	3.70083656874454	0.000214889850049043	0.00601026286483919		lncRNA	ENST00000425900	ENST00000425900	NA	NA	NA	novel transcript
ENSG00000271096	4.94017053605579	2.95937338243646	1.08076769768895	2.7382141312741	0.00617738396917875	0.0502534775124366	SUMO2P14	processed_pseudogene	ENST00000604488	ENST00000604488	NA	NA	NA	SUMO2 pseudogene 14 [Source:HGNC Symbol;Acc:HGNC:49352]
ENSG00000272215	2.90307100238942	2.95926383634212	1.0454887357243	2.83050762310889	0.00464742036899336	0.0416787428808967	U7	snRNA	ENST00000607576	ENST00000607576	124903094	NA	NA	U7 small nuclear RNA [Source:RFAM;Acc:RF00066]
ENSG00000187957	36.2758706576328	2.95658250877974	0.946374040848284	3.12411623857476	0.00178339989097477	0.0231400138097897	DNER	protein_coding	ENST00000341772	ENST00000341772	92737	GO:0001764	BP	delta/notch like EGF repeat containing [Source:HGNC Symbol;Acc:HGNC:24456]
ENSG00000289123	71.4800333584309	2.95335283925778	0.909577725119783	3.24694938947504	0.00116649130849804	0.0176369581271487		lncRNA	ENST00000692539	ENST00000692539	NA	NA	NA	novel transcript
ENSG00000232136	7.4080364017778	2.95268357422237	0.751315594340286	3.9300176869283	8.49396133050309e-05	0.00325836291548896	DUXAP7	processed_pseudogene	ENST00000431038	ENST00000431038	NA	NA	NA	double homeobox A pseudogene 7 [Source:HGNC Symbol;Acc:HGNC:32186]
ENSG00000240405	10.211389950513	2.95040687107286	0.83690594551697	3.52537449026049	0.000422884512427639	0.00923851096764701	SAMMSON	lncRNA	ENST00000641532	ENST00000642114	101927152	NA	NA	survival associated mitochondrial melanoma specific oncogenic non-coding RNA [Source:HGNC Symbol;Acc:HGNC:49644]
ENSG00000217083	24.7221829737628	2.9500963908839	0.81718638582356	3.61006551511598	0.000306119675565949	0.00759720296875561	MTCO2P33	processed_pseudogene	ENST00000402100	ENST00000402100	NA	NA	NA	MT-CO2 pseudogene 33 [Source:HGNC Symbol;Acc:HGNC:52162]
ENSG00000254369	1052.21672786937	2.94810608721333	0.917872780051837	3.21188965539085	0.00131865012809751	0.0191676351685164	HOXA-AS3	lncRNA	ENST00000518848	ENST00000518848	100133311	NA	NA	HOXA cluster antisense RNA 3 [Source:HGNC Symbol;Acc:HGNC:43748]
ENSG00000250781	11.4552129157697	2.94493729935715	0.963849148353692	3.05539233435778	0.00224766286323264	0.0266782279884725		lncRNA	ENST00000503321	ENST00000503321	105374428	NA	NA	novel transcript
ENSG00000230501	5.87789071741541	2.94418531754829	1.23632908017147	2.38139291938353	0.0172473043298084	0.0954795801882314	ANKRD30BP3	unprocessed_pseudogene	ENST00000444850	ENST00000444850	NA	NA	NA	ankyrin repeat domain 30B pseudogene 3 [Source:HGNC Symbol;Acc:HGNC:27873]
ENSG00000280623	7.83516277027012	2.94264430727624	1.19877738978472	2.45470454510715	0.0141000422600937	0.0841776103782098	PCAT14	lncRNA	ENST00000629869	ENST00000626825	NA	NA	NA	prostate cancer associated transcript 14 [Source:HGNC Symbol;Acc:HGNC:48977]
ENSG00000248529	8.40698649738028	2.93675148099793	1.14356586794721	2.56806500028689	0.0102267977562	0.0686914807495194		lncRNA	ENST00000505623	ENST00000513386	101928651	NA	NA	novel transcript
ENSG00000253552	641.513193314715	2.93640950134089	0.735884563366841	3.99031267608895	6.59862474076056e-05	0.00272511889865284	HOXA-AS2	lncRNA	ENST00000518088	ENST00000669815	NA	NA	NA	HOXA cluster antisense RNA 2 [Source:HGNC Symbol;Acc:HGNC:43745]
ENSG00000107338	924.284251659992	2.9348464471412	0.530079648039275	5.53661408808463	3.08374992571461e-08	1.3917133096971e-05	SHB	protein_coding	ENST00000377707	ENST00000377707	6461	GO:0001525	BP	SH2 domain containing adaptor protein B [Source:HGNC Symbol;Acc:HGNC:10838]
ENSG00000158815	25.4305028797379	2.93312153633892	0.822841577441329	3.56462485216124	0.000364376975126367	0.00842137991137434	FGF17	protein_coding	ENST00000518533	ENST00000359441	8822	GO:0001934	BP	fibroblast growth factor 17 [Source:HGNC Symbol;Acc:HGNC:3673]
ENSG00000248125	62.0776332547892	2.93203313648103	0.766856763583683	3.82344301532795	0.000131601017187902	0.00428426518657842		lncRNA	ENST00000512571	ENST00000653996	NA	NA	NA	novel transcript
ENSG00000267393	23.2717333368923	2.93126994119218	0.957228101631183	3.06224810596042	0.00219681283951111	0.0262253150870742		lncRNA	ENST00000588204	ENST00000588204	NA	NA	NA	novel transcript, antisense C18orf1
ENSG00000272984	2.84951979039871	2.92596972109663	1.01899374057948	2.87143051480641	0.00408618604703929	0.038392724647897		lncRNA	ENST00000608114	ENST00000608114	NA	NA	NA	novel transcript
ENSG00000201348	6.45290309365538	2.9184360898616	0.761142208622904	3.83428491653587	0.000125930107386011	0.0041748718903678	RNU105B	snoRNA	ENST00000364478	ENST00000364478	26767	GO:0005730	CC	RNA, U105B small nucleolar [Source:HGNC Symbol;Acc:HGNC:10103]
ENSG00000148488	2817.9067868089	2.91740879693433	0.910949915271823	3.20260065677023	0.00136192695529398	0.0195584440238455	ST8SIA6	protein_coding	ENST00000440449	ENST00000377602	338596	GO:0000139	CC	ST8 alpha-N-acetyl-neuraminide alpha-2,8-sialyltransferase 6 [Source:HGNC Symbol;Acc:HGNC:23317]
ENSG00000260244	324.560413947499	2.91622763823484	0.800079137672681	3.64492398429204	0.000267470847610231	0.00697857512580744		lncRNA	ENST00000569449	ENST00000569449	NA	NA	NA	novel transcript, overlapping GUCY1A3
ENSG00000274503	7.5648149311237	2.91410641269885	0.821632248058888	3.54672838071223	0.000390046507084255	0.00879063757920892		unprocessed_pseudogene	ENST00000612657	ENST00000612657	NA	NA	NA	transmembrane protein 61 (TMEM61) pseudogene
ENSG00000226900	5.80720298144273	2.91211133685017	0.98123895194845	2.96779019123484	0.00299948995641014	0.0317021260792152		lncRNA	ENST00000671286	ENST00000660050	NA	NA	NA	novel transcript
ENSG00000287603	240.061797757531	2.91067563934118	0.832056863429498	3.49816913635471	0.000468463942724036	0.00984782608160313		lncRNA	ENST00000666424	ENST00000666424	NA	NA	NA	novel transcript, antisense to SULT2B1
ENSG00000211930	41.3925640996179	2.90174317805043	0.70203814645773	4.13331268776738	3.57571726591019e-05	0.00183987937981914	IGHD3-3	IG_D_gene	ENST00000390590	ENST00000390590	NA	NA	NA	immunoglobulin heavy diversity 3-3 [Source:HGNC Symbol;Acc:HGNC:5498]
ENSG00000230818	5.89783695670484	2.90111218966927	1.19125476158748	2.43534152661285	0.0148777399321993	0.0870783949125287	MTND2P16	processed_pseudogene	ENST00000419987	ENST00000419987	NA	NA	NA	MT-ND2 pseudogene 16 [Source:HGNC Symbol;Acc:HGNC:42117]
ENSG00000277977	8.33143217305624	2.90031246097108	0.757398000590537	3.82931095501934	0.000128502552696243	0.0042296878727738		unprocessed_pseudogene	ENST00000620439	ENST00000620439	NA	NA	NA	novel zinc finger pseudogene
ENSG00000260123	16.9952990598055	2.8985741326993	1.03036672579219	2.81314803762781	0.0049059059801268	0.0431652832962898	CARMAL	lncRNA	ENST00000565938	ENST00000565938	NA	NA	NA	coronary artery disease region linked MFGE8 regulatory lncRNA [Source:HGNC Symbol;Acc:HGNC:55102]
ENSG00000184115	11.2663205885688	2.89833607035905	0.972371131428372	2.98068913882862	0.00287600575143719	0.0309915067348248		transcribed_unprocessed_pseudogene	ENST00000639295	ENST00000639295	NA	NA	NA	two-pore calcium channel 3 (TPCN3) pseudogene
ENSG00000215284	9.66307061847146	2.89753175623999	0.571586589340216	5.06927875894468	3.99326014066793e-07	8.77557327527437e-05	CHMP5P1	processed_pseudogene	ENST00000399931	ENST00000399931	NA	NA	NA	CHMP5 pseudogene 1 [Source:HGNC Symbol;Acc:HGNC:54950]
ENSG00000248682	8.28812696596008	2.89656195977819	0.777088250507989	3.72745561123165	0.000193422613479736	0.0056273602434407	ARHGAP22-IT1	lncRNA	ENST00000505718	ENST00000505718	NA	NA	NA	ARHGAP22 intronic transcript 1 [Source:HGNC Symbol;Acc:HGNC:42944]
ENSG00000239570	19.0501390481491	2.89017714458436	0.546796239311546	5.28565658795183	1.25254675833147e-07	4.051680873109e-05	SETP11	processed_pseudogene	ENST00000473027	ENST00000473027	NA	NA	NA	SET pseudogene 11 [Source:HGNC Symbol;Acc:HGNC:42930]
ENSG00000286830	36.8825388417962	2.88993231651063	0.839878538872644	3.44089315627679	0.000579797430441834	0.0112059475202001		lncRNA	ENST00000664535	ENST00000664535	NA	NA	NA	novel transcript
ENSG00000250072	21.7606302047779	2.8887970021467	0.619761667788775	4.66114177802175	3.14460003779653e-06	0.000341241041939385	SH3TC2-DT	lncRNA	ENST00000515304	ENST00000668914	NA	NA	NA	SH3TC2 divergent transcript [Source:HGNC Symbol;Acc:HGNC:52905]
ENSG00000198633	7.04658096264372	2.88871758184179	0.9778093436794	2.95427488038908	0.00313404715614328	0.0326845391152651	ZNF534	protein_coding	ENST00000433050	ENST00000433050	147658	GO:0000978	MF	zinc finger protein 534 [Source:HGNC Symbol;Acc:HGNC:26337]
ENSG00000233643	15.7195650175178	2.88763659928039	0.539354136312274	5.35387865758115	8.60886027098008e-08	3.08009677972412e-05	LINC02625	lncRNA	ENST00000441001	ENST00000441001	NA	NA	NA	long intergenic non-protein coding RNA 2625 [Source:HGNC Symbol;Acc:HGNC:54104]
ENSG00000152430	54.6146296159838	2.88725203062669	0.917219574622278	3.14783080356271	0.00164486871803463	0.0220108087993766	BOLL	protein_coding	ENST00000430004	ENST00000392296	66037	GO:0003730	BP	boule homolog, RNA binding protein [Source:HGNC Symbol;Acc:HGNC:14273]
ENSG00000279946	6.28680069309362	2.88719909533501	0.879665536562516	3.28215551858194	0.00103016771556578	0.0161925246889668		TEC	ENST00000624347	ENST00000624347	NA	NA	NA	novel transcript, sense intronic to RASSF5
ENSG00000250929	8.97282570058352	2.88607570568104	0.96151673651139	3.00158655183934	0.00268576676844414	0.0297434471175291	LINC01181	lncRNA	ENST00000503718	ENST00000503718	NA	NA	NA	long intergenic non-protein coding RNA 1181 [Source:HGNC Symbol;Acc:HGNC:25533]
ENSG00000255145	2075.19069733983	2.87973754248017	0.57983939601993	4.96643995259195	6.81931549313993e-07	0.000119672880981729	STX17-DT	lncRNA	ENST00000529965	ENST00000655615	NA	NA	NA	STX17 divergent transcript [Source:HGNC Symbol;Acc:HGNC:51174]
ENSG00000280274	7.2038269359312	2.87800477246536	0.753734365604579	3.81832765467299	0.00013435939922079	0.00436161727906805		TEC	ENST00000625119	ENST00000625119	NA	NA	NA	TEC
ENSG00000248752	114.647669155568	2.87570755567853	1.01771339103918	2.82565561286578	0.00471839631805273	0.0420789657821208		lncRNA	ENST00000651847	ENST00000651847	NA	NA	NA	novel transcript
ENSG00000219409	5.87752091373842	2.87219353548115	0.756546044173471	3.79645569176035	0.000146779582436491	0.00462023257049219		processed_pseudogene	ENST00000402856	ENST00000402856	NA	NA	NA	rhomboid domain containing 1 (RHBDD1) pseudogene
ENSG00000091972	525.247964913955	2.87176512578281	0.679711661601788	4.22497551243317	2.38966761314818e-05	0.00138831236123348	CD200	protein_coding	ENST00000607597	ENST00000315711	4345	GO:0002695	BP	CD200 molecule [Source:HGNC Symbol;Acc:HGNC:7203]
ENSG00000154165	37.7097687148728	2.87020692765603	0.934063397004233	3.07281811583825	0.00212047688016681	0.0257058462873236	GPR15	protein_coding	ENST00000284311	ENST00000284311	2838	GO:0001525	BP	G protein-coupled receptor 15 [Source:HGNC Symbol;Acc:HGNC:4469]
ENSG00000229294	206.294496335546	2.86838194495345	0.583998991096838	4.91162140462982	9.03263324640085e-07	0.000143789971362089		lncRNA	ENST00000435739	ENST00000435739	NA	NA	NA	novel transcript
ENSG00000261888	90.1390266437034	2.86826056545728	0.65941475790044	4.34970635869563	1.36319949248819e-05	0.000903863795606483		lncRNA	ENST00000573312	ENST00000573312	NA	NA	NA	novel transcript
ENSG00000136052	553.889278616366	2.86521968120383	0.578896329491713	4.94945214753663	7.4422672303267e-07	0.000128676444323008	SLC41A2	protein_coding	ENST00000258538	ENST00000258538	84102	GO:0005515	BP	solute carrier family 41 member 2 [Source:HGNC Symbol;Acc:HGNC:31045]
ENSG00000183960	243.394398913349	2.85776605242391	0.626936781184844	4.55830019579172	5.15692921479986e-06	0.000485288526317729	KCNH8	protein_coding	ENST00000328405	ENST00000328405	131096	GO:0005249	MF	potassium voltage-gated channel subfamily H member 8 [Source:HGNC Symbol;Acc:HGNC:18864]
ENSG00000183778	2.75916979635741	2.85613477507861	1.07895074097215	2.64714102935339	0.00811754917791594	0.0596696007105717	B3GALT5	protein_coding	ENST00000380620	ENST00000684187	10317	GO:0000139	CC	beta-1,3-galactosyltransferase 5 [Source:HGNC Symbol;Acc:HGNC:920]
ENSG00000230030	3.54830435741487	2.85524969479579	1.11611011387049	2.5582150536153	0.0105211005311414	0.0698109601162918		lncRNA	ENST00000453455	ENST00000453455	NA	NA	NA	novel transcript
ENSG00000173068	343.632746258045	2.85300325364752	0.826064536463226	3.45372925202985	0.000552892150192019	0.010934591034524	BNC2	protein_coding	ENST00000380672	ENST00000380672	54796	GO:0000182	MF	basonuclin 2 [Source:HGNC Symbol;Acc:HGNC:30988]
ENSG00000179855	107.782463535669	2.8529251218593	0.805218567412763	3.54304438237931	0.000395536129101235	0.0088405817119006	GIPC3	protein_coding	ENST00000644452	ENST00000644452	126326	GO:0005515	MF	GIPC PDZ domain containing family member 3 [Source:HGNC Symbol;Acc:HGNC:18183]
ENSG00000187054	21.3915770932583	2.84639050651229	0.757554508941015	3.75734085523595	0.000171728511619636	0.00519730443541638	TMPRSS11A	protein_coding	ENST00000508048	ENST00000508048	339967	GO:0004252	MF	transmembrane serine protease 11A [Source:HGNC Symbol;Acc:HGNC:27954]
ENSG00000284543	124.009815336154	2.84578317978408	0.652107679552908	4.36397740590202	1.27718774193062e-05	0.000873305730619574	LINC01226	lncRNA	ENST00000639839	ENST00000640226	NA	NA	NA	long intergenic non-protein coding RNA 1226 [Source:HGNC Symbol;Acc:HGNC:49678]
ENSG00000186038	3.57698319359712	2.84562690636091	1.17225315918287	2.42748495414119	0.0152039174691998	0.0882302265577091	HTR3E	protein_coding	ENST00000415389	ENST00000415389	285242	GO:0005231	BP	5-hydroxytryptamine receptor 3E [Source:HGNC Symbol;Acc:HGNC:24005]
ENSG00000268278	26.9259515578992	2.84560058441863	0.922012027979697	3.0862944279088	0.00202668031948613	0.0250324457133598		unprocessed_pseudogene	ENST00000600907	ENST00000600907	NA	NA	NA	zinc finger protein 100 (ZNF100) pseudogene
ENSG00000233393	3.47209643760346	2.8415713923951	1.02698631438056	2.76690288137775	0.00565916113152822	0.0472993027675939		lncRNA	ENST00000422473	ENST00000422473	105369306	NA	NA	novel transcript
ENSG00000223528	423.058252821823	2.84047945863873	0.837522247645386	3.3915271703223	0.000695042713946473	0.012645346664999		lncRNA	ENST00000627944	ENST00000601242	NA	NA	NA	novel transcript
ENSG00000203697	4.84400573762696	2.84033044000786	1.18179021257585	2.40341340601985	0.0162428134117924	0.0918832663507403	CAPN8	protein_coding	ENST00000484873	ENST00000366872	388743	GO:0004198	MF	calpain 8 [Source:HGNC Symbol;Acc:HGNC:1485]
ENSG00000225731	7.66169737117406	2.83756024597058	0.937177083961259	3.02777382688102	0.00246362399325441	0.0283168408392123	PDE9A-AS1	lncRNA	ENST00000437426	ENST00000437426	101928284	NA	NA	PDE9A antisense RNA 1 [Source:HGNC Symbol;Acc:HGNC:40440]
ENSG00000251799	7.811075097118	2.83409184285089	1.16816926676784	2.42609690519632	0.0152621944010541	0.088460246878498	Y_RNA	misc_RNA	ENST00000515990	ENST00000515990	NA	NA	NA	Y RNA [Source:RFAM;Acc:RF00019]
ENSG00000277695	53.6993352344633	2.83361773526502	0.570562451470559	4.96635859573601	6.82217552641028e-07	0.000119672880981729		lncRNA	ENST00000615968	ENST00000615968	NA	NA	NA	novel transcript, antisense to SNCA
ENSG00000113389	2300.82488249789	2.82714591188012	0.855375292135107	3.30515264805378	0.000949246849191227	0.0153684803017239	NPR3	protein_coding	ENST00000509104	ENST00000265074	4883	GO:0001501	BP	natriuretic peptide receptor 3 [Source:HGNC Symbol;Acc:HGNC:7945]
ENSG00000229646	3.59827135087788	2.82713083423335	0.998720315919149	2.83075330417352	0.0046438523574011	0.0416642676909341		lncRNA	ENST00000414740	ENST00000414740	NA	NA	NA	novel transcript
ENSG00000182601	673.889355362387	2.82593095797523	1.07705520479999	2.62375683751512	0.00869658484411463	0.062121621810551	HS3ST4	protein_coding	ENST00000331351	ENST00000331351	9951	GO:0000139	CC	heparan sulfate-glucosamine 3-sulfotransferase 4 [Source:HGNC Symbol;Acc:HGNC:5200]
ENSG00000106004	208.755163008187	2.82580060710212	0.972451428547947	2.90585269777594	0.00366253822134725	0.0358865187545022	HOXA5	protein_coding	ENST00000222726	ENST00000222726	3202	GO:0000785	CC	homeobox A5 [Source:HGNC Symbol;Acc:HGNC:5106]
ENSG00000267402	59.0606116363213	2.82474119538357	0.478797067104638	5.89966269523169	3.64245446470702e-09	3.13389844134888e-06	TCF4-AS2	lncRNA	ENST00000586467	ENST00000586467	NA	NA	NA	TCF4 antisense RNA 2 [Source:HGNC Symbol;Acc:HGNC:51643]
ENSG00000236948	46.9278236591224	2.82252296428889	0.881344733482009	3.20251867068825	0.00136231468917476	0.0195584440238455		lncRNA	ENST00000637702	ENST00000637702	NA	NA	NA	novel transcript
ENSG00000141096	168.106213236294	2.82243816440879	0.892667173224449	3.16180346837861	0.00156795347455869	0.0213722993051541	DPEP3	protein_coding	ENST00000268793	ENST00000268793	64180	GO:0001669	CC	dipeptidase 3 [Source:HGNC Symbol;Acc:HGNC:23029]
ENSG00000285081	43.5806159488326	2.82131897271859	0.766926652146505	3.67873376785403	0.00023439478925	0.00636848880025415		lncRNA	ENST00000642619	ENST00000642619	NA	NA	NA	Novel transcript, sense intronic to CPVL
ENSG00000166148	28.3610445618578	2.82086791700628	0.987135205832675	2.85763074839054	0.00426816752183184	0.0396082438543697	AVPR1A	protein_coding	ENST00000299178	ENST00000299178	552	GO:0001992	BP	arginine vasopressin receptor 1A [Source:HGNC Symbol;Acc:HGNC:895]
ENSG00000184709	17.7022767010453	2.820540226771	1.0469100501565	2.69415717840263	0.00705668784251519	0.0547931661334381	LRRC26	protein_coding	ENST00000371542	ENST00000371542	389816	GO:0005249	MF	leucine rich repeat containing 26 [Source:HGNC Symbol;Acc:HGNC:31409]
ENSG00000078328	69.3299573537645	2.82047419982121	0.824630402727874	3.42028888395467	0.000625546684270288	0.011797888821916	RBFOX1	protein_coding	ENST00000569895	ENST00000550418	54715	GO:0000381	BP	RNA binding fox-1 homolog 1 [Source:HGNC Symbol;Acc:HGNC:18222]
ENSG00000261978	6.152905319373	2.81753713355529	0.859060866204565	3.27978754986653	0.00103885283897525	0.0162661239155036		lncRNA	ENST00000575404	ENST00000575404	124904072	NA	NA	novel transcript, antisense to TBC1D16
ENSG00000288321	2.76484916228265	2.81606687695129	1.12549312925856	2.50207380546731	0.0123468182659522	0.0774860411355414		lncRNA	ENST00000673514	ENST00000673514	NA	NA	NA	novel transcript
ENSG00000174944	1415.859070628	2.81381710303732	0.467861687500746	6.01420714328706	1.80769240736516e-09	2.17742576108492e-06	P2RY14	protein_coding	ENST00000309170	ENST00000309170	9934	GO:0005886	MF	purinergic receptor P2Y14 [Source:HGNC Symbol;Acc:HGNC:16442]
ENSG00000211918	18.7613575578033	2.81317539535258	1.01572184448888	2.76963167683785	0.00561197148959939	0.0470517873979652	IGHD2-15	IG_D_gene	ENST00000390578	ENST00000390578	NA	NA	NA	immunoglobulin heavy diversity 2-15 [Source:HGNC Symbol;Acc:HGNC:5489]
ENSG00000267709	4.25673264563001	2.80644967619582	1.01656231853488	2.76072565845309	0.00576730999326501	0.0478987621044873		lncRNA	ENST00000589276	ENST00000589276	101928844	NA	NA	novel transcript, antisense to FUT3
ENSG00000253298	15.3961893523766	2.80195541508635	0.723312056687229	3.87378502705915	0.000107157945684629	0.0037631287903399	LINC01845	lncRNA	ENST00000518418	ENST00000518418	285627	NA	NA	long intergenic non-protein coding RNA 1845 [Source:HGNC Symbol;Acc:HGNC:27747]
ENSG00000187758	5.36396225959992	2.80161446676635	1.03234336611547	2.71383975402327	0.00665083294174963	0.0526011160391912	ADH1A	protein_coding	ENST00000209668	ENST00000209668	124	GO:0004022	BP	alcohol dehydrogenase 1A (class I), alpha polypeptide [Source:HGNC Symbol;Acc:HGNC:249]
ENSG00000234810	71.496953227882	2.79833469371802	0.925180020399956	3.02463805099065	0.00248930836523282	0.0284213734869046		lncRNA	ENST00000643167	ENST00000643167	NA	NA	NA	novel transcript
ENSG00000232935	133.639085847051	2.79678844197689	0.840181536458962	3.3287906489403	0.000872239416744458	0.0145571153408845		lncRNA	ENST00000420941	ENST00000420941	NA	NA	NA	novel transcript, antisense to DOCK1
ENSG00000113248	10.1000378252288	2.78644066326339	0.88679411964448	3.14215058663276	0.00167711755781528	0.0223279850596833	PCDHB15	protein_coding	ENST00000623671	ENST00000231173	56121	GO:0005509	MF	protocadherin beta 15 [Source:HGNC Symbol;Acc:HGNC:8686]
ENSG00000161835	1099.2684401533	2.78524993099098	0.821298128667382	3.39127758090751	0.000695676034149269	0.012645346664999	TAMALIN	protein_coding	ENST00000293662	ENST00000293662	160622	GO:0005886	MF	trafficking regulator and scaffold protein tamalin [Source:HGNC Symbol;Acc:HGNC:18707]
ENSG00000287355	42.8375625630666	2.7850634332888	0.751031157279009	3.70831943028716	0.00020863936035123	0.00590398741241351		lncRNA	ENST00000657557	ENST00000657557	NA	NA	NA	novel transcript, sense intronic to MOB3B
ENSG00000152931	68.8454508249976	2.78269688594356	0.633419715226176	4.39313273498275	1.11728862956906e-05	0.000802670813481263	PART1	lncRNA	ENST00000515734	ENST00000506884	25859	NA	NA	prostate androgen-regulated transcript 1 [Source:HGNC Symbol;Acc:HGNC:17263]
ENSG00000213997	13.693257573622	2.78140599345293	0.50190311815766	5.54171889519766	2.99516855471537e-08	1.37004317586322e-05	PGAM1P7	processed_pseudogene	ENST00000413837	ENST00000413837	NA	NA	NA	phosphoglycerate mutase 1 pseudogene 7 [Source:HGNC Symbol;Acc:HGNC:42454]
ENSG00000250039	35.3724424401187	2.77937210073103	0.550246645223121	5.0511386572907	4.39184108564207e-07	9.094298926565e-05		lncRNA	ENST00000510705	ENST00000510705	NA	NA	NA	novel transcript
ENSG00000036530	37.8037524233356	2.77797306020574	0.848880023783157	3.27251552913838	0.0010659501669664	0.016519532337733	CYP46A1	protein_coding	ENST00000261835	ENST00000261835	10858	GO:0005506	MF	cytochrome P450 family 46 subfamily A member 1 [Source:HGNC Symbol;Acc:HGNC:2641]
ENSG00000155367	50.243730214277	2.77228939493705	0.863311209413526	3.21122830875827	0.00132168883291619	0.0191963616021943	PPM1J	protein_coding	ENST00000471106	ENST00000309276	333926	GO:0004741	MF	protein phosphatase, Mg2+/Mn2+ dependent 1J [Source:HGNC Symbol;Acc:HGNC:20785]
ENSG00000162771	3.84128514392036	2.7716345771711	1.14822485784532	2.41384303626047	0.0157852609488097	0.0903409045275168	GARIN4	protein_coding	ENST00000294829	ENST00000294829	149647	GO:0005515	MF	golgi associated RAB2 interactor family member 4 [Source:HGNC Symbol;Acc:HGNC:26541]
ENSG00000279786	4.26386404860249	2.77078317504954	0.98057846226784	2.82566187374888	0.00471830410409495	0.0420789657821208		TEC	ENST00000623208	ENST00000623208	NA	NA	NA	TEC
ENSG00000287955	3.95156811013034	2.76908924666679	1.12474565808534	2.46196926990643	0.0138176505196809	0.0832191031965313		lncRNA	ENST00000662751	ENST00000662751	124902232	NA	NA	novel transcript
ENSG00000169184	664.967946301289	2.76848111688886	0.5929821530872	4.66874273108477	3.03048583715697e-06	0.000336952726804629	MN1	protein_coding	ENST00000302326	ENST00000302326	4330	GO:0001957	BP	MN1 proto-oncogene, transcriptional regulator [Source:HGNC Symbol;Acc:HGNC:7180]
ENSG00000206687	7.69903956094564	2.76786519672152	0.978323003246608	2.82919361758462	0.0046665457688684	0.0417815406104629	RNU1-109P	snRNA	ENST00000383960	ENST00000383960	NA	NA	NA	RNA, U1 small nuclear 109, pseudogene [Source:HGNC Symbol;Acc:HGNC:48451]
ENSG00000224796	74.4293689702893	2.76658550762231	0.465790576684031	5.93954804177806	2.85808914197976e-09	2.79975634081015e-06	RPL32P1	processed_pseudogene	ENST00000439737	ENST00000439737	NA	NA	NA	ribosomal protein L32 pseudogene 1 [Source:HGNC Symbol;Acc:HGNC:10339]
ENSG00000246662	136.977545914805	2.76629922464945	0.577984651556265	4.78611191006715	1.7004326595623e-06	0.000222633458644722	CIBAR1-DT	lncRNA	ENST00000520513	ENST00000501400	642924	NA	NA	CIBAR1 divergent transcript [Source:HGNC Symbol;Acc:HGNC:43644]
ENSG00000280190	16.3321654225193	2.76376688396444	0.560170289181244	4.93379769927465	8.06459697511748e-07	0.000134295979858454		TEC	ENST00000624371	ENST00000624371	NA	NA	NA	TEC
ENSG00000130584	835.523933562935	2.7630741564993	0.495066907466531	5.58121359926708	2.38846099564912e-08	1.19874203526079e-05	ZBTB46	protein_coding	ENST00000245663	ENST00000245663	140685	GO:0000122	BP	zinc finger and BTB domain containing 46 [Source:HGNC Symbol;Acc:HGNC:16094]
ENSG00000278226	6.4565442055779	2.76173262893567	1.16017018330969	2.3804547545405	0.0172912843450757	0.0956286885665224	Metazoa_SRP	misc_RNA	ENST00000615776	ENST00000615776	NA	NA	NA	Metazoan signal recognition particle RNA [Source:RFAM;Acc:RF00017]
ENSG00000145423	44.7587931988154	2.75952321511136	0.972719132870152	2.83691676441993	0.00455514854209324	0.0413061098411747	SFRP2	protein_coding	ENST00000274063	ENST00000274063	6423	GO:0001569	BP	secreted frizzled related protein 2 [Source:HGNC Symbol;Acc:HGNC:10777]
ENSG00000263584	8.3384732671812	2.75820249269451	0.930545680857735	2.96406995318287	0.00303599262918418	0.0319943510201807	MIR4480	miRNA	ENST00000582492	ENST00000582492	100616151	NA	NA	microRNA 4480 [Source:HGNC Symbol;Acc:HGNC:41716]
ENSG00000257178	73.0723180866975	2.75522611343976	1.0545780630543	2.61263363042087	0.0089847560081057	0.0633688548320683		lncRNA	ENST00000548801	ENST00000548801	NA	NA	NA	novel transcript, sense intronic to HOXB3
ENSG00000225285	26.9096409760314	2.75349132322868	1.03163892401308	2.66904559253891	0.00760671239278584	0.0573734416668147	LINC01770	lncRNA	ENST00000430109	ENST00000430109	NA	NA	NA	long intergenic non-protein coding RNA 1770 [Source:HGNC Symbol;Acc:HGNC:52560]
ENSG00000205436	21.2622164260475	2.75236940003942	0.910998196132771	3.02126767289261	0.0025171872813612	0.0285640796227573	EXOC3L4	protein_coding	ENST00000688303	ENST00000688303	91828	GO:0000145	CC	exocyst complex component 3 like 4 [Source:HGNC Symbol;Acc:HGNC:20120]
ENSG00000263438	6.96553116012582	2.75063991524578	0.931912041376959	2.95160894281561	0.00316123008203101	0.0328442291121304	LINC01919	lncRNA	ENST00000578610	ENST00000654465	102724651	NA	NA	long intergenic non-protein coding RNA 1919 [Source:HGNC Symbol;Acc:HGNC:52739]
ENSG00000229009	5.84225344198684	2.74437141172331	0.990846721792527	2.76972346112071	0.00561039043387499	0.0470496794426797	TMPRSS11GP	transcribed_unprocessed_pseudogene	ENST00000431070	ENST00000431070	NA	NA	NA	transmembrane serine protease 11G, pseudogene [Source:HGNC Symbol;Acc:HGNC:42983]
ENSG00000152154	14.1790063371086	2.74429200303685	0.796677665013211	3.44467044019785	0.000571756037376263	0.0111200087010918	TMEM178A	protein_coding	ENST00000437068	ENST00000281961	130733	GO:0005789	BP	transmembrane protein 178A [Source:HGNC Symbol;Acc:HGNC:28517]
ENSG00000284895	565.562775728337	2.74395282594501	0.448258636445269	6.12136075660428	9.27795763354745e-10	1.39695115435779e-06		protein_coding	ENST00000646142	ENST00000646142	NA	NA	NA	novel protein
ENSG00000234323	547.988315524082	2.74272342969472	0.522299589100855	5.25124562019347	1.51074064854854e-07	4.54934367299585e-05	LINC01505	lncRNA	ENST00000637185	ENST00000637185	100996590	NA	NA	long intergenic non-protein coding RNA 1505 [Source:HGNC Symbol;Acc:HGNC:51186]
ENSG00000088002	204.848895743101	2.74116304849195	0.809535156445741	3.3860951271431	0.000708948036083319	0.0127306933753278	SULT2B1	protein_coding	ENST00000201586	ENST00000201586	6820	GO:0003676	MF	sulfotransferase family 2B member 1 [Source:HGNC Symbol;Acc:HGNC:11459]
ENSG00000248100	17.6368106494459	2.74011318816504	0.850000764113089	3.22365967638175	0.00126563715157339	0.0186743461991758		lncRNA	ENST00000506925	ENST00000506925	NA	NA	NA	novel transcript
ENSG00000236244	13.7929618310927	2.73552789757304	0.936592656954307	2.9207231951494	0.00349219952452327	0.0348181280156214	SLC35F3-AS1	lncRNA	ENST00000446433	ENST00000446433	NA	NA	NA	SLC35F3 antisense RNA 1 [Source:HGNC Symbol;Acc:HGNC:41027]
ENSG00000290094	47.3022837560376	2.73489762062119	0.570267654755398	4.79581403191149	1.62015536518801e-06	0.00021289430645976		lncRNA	ENST00000702949	ENST00000702949	NA	NA	NA	novel transcript, sense intronic to DNAJC6
ENSG00000104490	1678.41776274765	2.73402478190464	0.525783734042404	5.19990369592555	1.99391810107025e-07	5.38597340170763e-05	NCALD	protein_coding	ENST00000220931	ENST00000220931	83988	GO:0003073	BP	neurocalcin delta [Source:HGNC Symbol;Acc:HGNC:7655]
ENSG00000227394	7.43212037833934	2.73397836785797	0.630360492049011	4.33716643467149	1.44331334463192e-05	0.000948283109483984	RPL11P1	processed_pseudogene	ENST00000455212	ENST00000455212	NA	NA	NA	ribosomal protein L11 pseudogene 1 [Source:HGNC Symbol;Acc:HGNC:37021]
ENSG00000229442	6.24140814728625	2.73166018520166	1.14480832731603	2.38612885670212	0.0170267839802478	0.0948403114461968	THEMIS3P	unitary_pseudogene	ENST00000416112	ENST00000416112	NA	NA	NA	thymocyte selection associated family member 3, pseudogene [Source:HGNC Symbol;Acc:HGNC:49196]
ENSG00000258986	3.26717392154814	2.72705806948647	1.05301459809044	2.58976283370789	0.00960420745034504	0.0658678383802749	TMEM179	protein_coding	ENST00000415614	ENST00000556573	388021	GO:0016020	CC	transmembrane protein 179 [Source:HGNC Symbol;Acc:HGNC:20137]
ENSG00000236591	19.1321683698069	2.72368814892209	0.827117037726399	3.29299001796533	0.000991279938964474	0.0158289402891826	UST-AS2	lncRNA	ENST00000433442	ENST00000433442	NA	NA	NA	UST antisense RNA 2 [Source:HGNC Symbol;Acc:HGNC:40803]
ENSG00000139970	1917.05830804872	2.72070586971327	0.913637351185854	2.97788380278228	0.00290245997709802	0.0311503693888963	RTN1	protein_coding	ENST00000481205	ENST00000267484	6252	GO:0000139	CC	reticulon 1 [Source:HGNC Symbol;Acc:HGNC:10467]
ENSG00000249363	10.1875364841825	2.71911832501615	0.876233756070248	3.10318828301127	0.00191447797962727	0.0242089515782144	TRPC6P2	processed_pseudogene	ENST00000509592	ENST00000509592	NA	NA	NA	TRPC6 pseudogene 2 [Source:HGNC Symbol;Acc:HGNC:55943]
ENSG00000255553	4.974055889889	2.71800639336701	0.933110066522866	2.91284650212313	0.0035815060497981	0.0353593932244628	LINC02733	lncRNA	ENST00000524942	ENST00000658933	100507521	NA	NA	long intergenic non-protein coding RNA 2733 [Source:HGNC Symbol;Acc:HGNC:54250]
ENSG00000115598	43.2109442837077	2.71795566516057	1.03752794154752	2.61964575248607	0.00880211494337533	0.0626005167474535	IL1RL2	protein_coding	ENST00000481806	ENST00000264257	8808	GO:0004908	BP	interleukin 1 receptor like 2 [Source:HGNC Symbol;Acc:HGNC:5999]
ENSG00000230131	129.607126432387	2.71365182544878	0.753303322121377	3.60233619812915	0.000315370123722302	0.0077128445820958	LINC02641	lncRNA	ENST00000448347	ENST00000662754	NA	NA	NA	long intergenic non-protein coding RNA 2641 [Source:HGNC Symbol;Acc:HGNC:54125]
ENSG00000213361	3.34695040910113	2.7135121174323	0.90666008451373	2.99286597455941	0.00276371087787085	0.0303093949264768	RPL36P12	processed_pseudogene	ENST00000393647	ENST00000393647	NA	NA	NA	ribosomal protein L36 pseudogene 12 [Source:HGNC Symbol;Acc:HGNC:35590]
ENSG00000064989	1504.69768808695	2.71283081641727	0.762215037475592	3.55914103374554	0.00037206970084192	0.00851495295099659	CALCRL	protein_coding	ENST00000392370	ENST00000392370	10203	GO:0001525	CC	calcitonin receptor like receptor [Source:HGNC Symbol;Acc:HGNC:16709]
ENSG00000183166	1248.51053374615	2.71254560661079	0.635351802121185	4.2693600577738	1.96034597553508e-05	0.00120679833342309	CALN1	protein_coding	ENST00000329008	ENST00000395275	83698	GO:0005509	MF	calneuron 1 [Source:HGNC Symbol;Acc:HGNC:13248]
ENSG00000112902	79.1497014800602	2.71210831506756	0.771514022840773	3.51530657224009	0.000439246605301713	0.00946488689873746	SEMA5A	protein_coding	ENST00000382496	ENST00000382496	9037	GO:0001755	BP	semaphorin 5A [Source:HGNC Symbol;Acc:HGNC:10736]
ENSG00000079691	2881.02113074866	2.70885552632317	0.539974135756199	5.01663940353289	5.25831266019573e-07	0.000102704716306779	CARMIL1	protein_coding	ENST00000461945	ENST00000329474	55604	GO:0005515	MF	capping protein regulator and myosin 1 linker 1 [Source:HGNC Symbol;Acc:HGNC:21581]
ENSG00000280224	44.1413723555369	2.7039146616769	0.93155034798894	2.90259637336211	0.00370083271869253	0.0361441327358576		lncRNA	ENST00000625038	ENST00000625038	NA	NA	NA	novel transcript
ENSG00000283422	9.4678823327244	2.70165493739745	0.937137010135329	2.8828814871022	0.00394055665182137	0.037551675941513	LINC02452	lncRNA	ENST00000637833	ENST00000637833	NA	NA	NA	long intergenic non-protein coding RNA 2452 [Source:HGNC Symbol;Acc:HGNC:53384]
ENSG00000286508	116.88287936777	2.70082207097007	0.564771829132219	4.7821472879055	1.73432523875038e-06	0.000225437326717567		lncRNA	ENST00000661649	ENST00000661649	NA	NA	NA	novel transcript
ENSG00000183780	321.822615361561	2.70062748352165	0.644709695930866	4.18890471256577	2.80304058448059e-05	0.00154406516098766	SLC35F3	protein_coding	ENST00000366618	ENST00000366618	148641	GO:0015888	CC	solute carrier family 35 member F3 [Source:HGNC Symbol;Acc:HGNC:23616]
ENSG00000265470	6.67205866571679	2.70018783041321	0.950482314409618	2.84086067618249	0.00449919638531932	0.0409632049835976	MIR548AQ	miRNA	ENST00000580207	ENST00000580207	100847078	NA	NA	microRNA 548aq [Source:HGNC Symbol;Acc:HGNC:43488]
ENSG00000166963	1057.67770145238	2.69945438727669	0.654547294610993	4.12415483113563	3.72098538259454e-05	0.00188850460372804	MAP1A	protein_coding	ENST00000382031	ENST00000300231	4130	GO:0000226	BP	microtubule associated protein 1A [Source:HGNC Symbol;Acc:HGNC:6835]
ENSG00000013619	214.115510933017	2.69941993990362	0.656209371771378	4.11365648835033	3.89440824899453e-05	0.00194914593470452	MAMLD1	protein_coding	ENST00000468306	ENST00000370401	10046	GO:0003674	BP	mastermind like domain containing 1 [Source:HGNC Symbol;Acc:HGNC:2568]
ENSG00000286690	5.58220850623152	2.69882314977705	1.05096700102929	2.56794280613367	0.0102304033909385	0.0686914807495194		lncRNA	ENST00000659143	ENST00000659143	NA	NA	NA	novel transcript, antisense to SGCD
ENSG00000252438	12.4652610662395	2.69681969453944	0.641577118234798	4.20342250041481	2.62909194253751e-05	0.00147752513896634		snoRNA	ENST00000516629	ENST00000516629	NA	NA	NA	NULL
ENSG00000205231	14.8706798391139	2.69551418811272	1.13221984296258	2.38073392271557	0.0172781870157884	0.0955855122477846	TTLL10-AS1	lncRNA	ENST00000379317	ENST00000379317	100506376	NA	NA	TTLL10 antisense RNA 1 [Source:HGNC Symbol;Acc:HGNC:41159]
ENSG00000286831	14.6770805511467	2.69504590796736	0.978329748126829	2.75474185787304	0.00587384588656389	0.0486195553670636		lncRNA	ENST00000663830	ENST00000663830	NA	NA	NA	novel transcript
ENSG00000211909	12.3374141468578	2.69496396291085	1.10573235675461	2.43726607659445	0.0147987856683813	0.0868673473189482	IGHD5-24	IG_D_gene	ENST00000390569	ENST00000390569	NA	NA	NA	immunoglobulin heavy diversity 5-24 (non-functional) [Source:HGNC Symbol;Acc:HGNC:5510]
ENSG00000172348	102.69577695004	2.69135376175165	0.83591980801261	3.21963151961946	0.00128355467112366	0.0188240793813817	RCAN2	protein_coding	ENST00000330430	ENST00000371374	10231	GO:0003676	MF	regulator of calcineurin 2 [Source:HGNC Symbol;Acc:HGNC:3041]
ENSG00000288050	37.9573159806368	2.69068848001222	0.640667610702008	4.19981974282096	2.67127558998729e-05	0.0014965769723997		lncRNA	ENST00000658475	ENST00000658475	NA	NA	NA	novel transcript, antisense to RFTN1
ENSG00000263159	3.15626899635829	2.68785173103757	0.984292347644094	2.73074532934341	0.00631912814952442	0.0510503051221137		lncRNA	ENST00000571169	ENST00000571169	NA	NA	NA	novel transcript, antisense ADCY9
ENSG00000291115	7.3339200783221	2.68780932514605	1.00416480209351	2.67666155947952	0.00743597056908844	0.0565102486823512	ZNF300P1	lncRNA	ENST00000687176	ENST00000685103	134466	NA	NA	zinc finger protein 300 pseudogene 1 [Source:HGNC Symbol;Acc:HGNC:27032]
ENSG00000231678	5.04238908393989	2.68705604371344	1.08787516489594	2.4700040320991	0.0135111529228411	0.0819192989966086		lncRNA	ENST00000415465	ENST00000415465	NA	NA	NA	novel transcript
ENSG00000272763	3.93980036106122	2.68692358391776	0.836065812888558	3.21377042631919	0.00131004370646846	0.019080910671884		lncRNA	ENST00000433510	ENST00000433510	NA	NA	NA	novel transcript
ENSG00000232928	206.809811497699	2.68661015656533	0.530167475118017	5.06747449184294	4.03128504454158e-07	8.77557327527437e-05	DDX3P1	processed_pseudogene	ENST00000418231	ENST00000418231	NA	NA	NA	DEAD-box helicase 3 pseudogene 1 [Source:HGNC Symbol;Acc:HGNC:42171]
ENSG00000232772	7.09160372210137	2.6832221672789	1.12492892674251	2.38523706119709	0.0170681187514861	0.0949375171915327	MTND4P22	processed_pseudogene	ENST00000413116	ENST00000413116	NA	NA	NA	MT-ND4 pseudogene 22 [Source:HGNC Symbol;Acc:HGNC:42209]
ENSG00000167014	5.52853048472372	2.68157844741503	1.08426076915884	2.47318590111435	0.0133914462919723	0.0814257619395443	TERB2	protein_coding	ENST00000340827	ENST00000340827	145645	GO:0000781	BP	telomere repeat binding bouquet formation protein 2 [Source:HGNC Symbol;Acc:HGNC:28520]
ENSG00000179639	1156.53524373313	2.67987929719972	0.64754755886281	4.13850575223538	3.49575109746356e-05	0.00181497789738424	FCER1A	protein_coding	ENST00000368115	ENST00000693622	2205	GO:0005515	BP	Fc epsilon receptor Ia [Source:HGNC Symbol;Acc:HGNC:3609]
ENSG00000124216	222.09801128404	2.67956929808329	0.654813854094944	4.09210843864457	4.27468659359224e-05	0.00208743344251418	SNAI1	protein_coding	ENST00000244050	ENST00000244050	6615	GO:0000122	BP	snail family transcriptional repressor 1 [Source:HGNC Symbol;Acc:HGNC:11128]
ENSG00000233061	15.1127059822557	2.67824390089927	0.921488093749869	2.90643353838738	0.00365574550287888	0.0358344439387242	TTLL7-IT1	lncRNA	ENST00000455929	ENST00000455929	100874314	NA	NA	TTLL7 intronic transcript 1 [Source:HGNC Symbol;Acc:HGNC:41486]
ENSG00000168453	13.4025472392988	2.67747918357363	0.789732031379617	3.39036417061142	0.000697998341129195	0.012668442016597	HR	protein_coding	ENST00000381418	ENST00000381418	55806	GO:0000118	CC	HR lysine demethylase and nuclear receptor corepressor [Source:HGNC Symbol;Acc:HGNC:5172]
ENSG00000231461	34.0872463622828	2.67561924447625	0.661366124757573	4.04559463256001	5.21904769663548e-05	0.00234096558497118	HLA-DPA2	unprocessed_pseudogene	ENST00000433582	ENST00000433582	NA	NA	NA	major histocompatibility complex, class II, DP alpha 2 (pseudogene) [Source:HGNC Symbol;Acc:HGNC:4939]
ENSG00000207626	3.19821068765375	2.67117593568599	1.09213879213682	2.44582094777506	0.0144522753686451	0.0854882014603633	MIR562	miRNA	ENST00000384894	ENST00000384894	693147	GO:0035195	MF	microRNA 562 [Source:HGNC Symbol;Acc:HGNC:32818]
ENSG00000254209	4.11490622496654	2.66885379611794	0.96244576592683	2.77299136284094	0.00555435949323413	0.0468009670979582	LINC02855	lncRNA	ENST00000518922	ENST00000663221	105375732	NA	NA	long intergenic non-protein coding RNA 2855 [Source:HGNC Symbol;Acc:HGNC:54392]
ENSG00000280780	385.698142523384	2.66694366595102	0.735430991856662	3.62636834112481	0.000287435266743542	0.00735421794359591	JAKMIP2-AS1	lncRNA	ENST00000626945	ENST00000686563	153469	NA	NA	JAKMIP2 antisense RNA 1 [Source:HGNC Symbol;Acc:HGNC:27203]
ENSG00000256810	7.5045093129487	2.66526898522476	1.00033096184145	2.66438717473906	0.00771287343203279	0.0579856962836761		lncRNA	ENST00000535370	ENST00000535370	NA	NA	NA	novel transcript
ENSG00000153944	24595.8302379039	2.66481497877299	0.610659517870008	4.36383107245739	1.27804281926037e-05	0.000873305730619574	MSI2	protein_coding	ENST00000416426	ENST00000284073	124540	GO:0003723	MF	musashi RNA binding protein 2 [Source:HGNC Symbol;Acc:HGNC:18585]
ENSG00000260420	16.6389954949793	2.66371335021089	0.731082249972917	3.64352075338934	0.000268933957105926	0.0070015831945099	LINC02182	lncRNA	ENST00000665557	ENST00000665557	101928880	NA	NA	long intergenic non-protein coding RNA 2182 [Source:HGNC Symbol;Acc:HGNC:53044]
ENSG00000187862	233.052242167542	2.66357810337156	0.666399802152631	3.99696712809273	6.41592062957334e-05	0.00268339939664655	TTC24	protein_coding	ENST00000368236	ENST00000368236	164118	NA	NA	tetratricopeptide repeat domain 24 [Source:HGNC Symbol;Acc:HGNC:32348]
ENSG00000177469	581.353956408573	2.66211654458873	0.920650361265862	2.89156085370826	0.00383333347107975	0.0369784672479813	CAVIN1	protein_coding	ENST00000357037	ENST00000357037	284119	GO:0003723	MF	caveolae associated protein 1 [Source:HGNC Symbol;Acc:HGNC:9688]
ENSG00000276542	6.52358904508641	2.66136757438074	0.881945760388048	3.01760912508923	0.0025477729215591	0.0287372408598866		lncRNA	ENST00000620420	ENST00000620420	NA	NA	NA	novel transcript, antisense to SNCA
ENSG00000291062	25.7255803640645	2.6603161336842	1.02386459984693	2.59830854009594	0.0093684273089758	0.0648290864107908		lncRNA	ENST00000558187	ENST00000558550	NA	NA	NA	novel transcript
ENSG00000104970	28.9372288676519	2.65877066876611	0.682402028455317	3.89619397056087	9.7716140236441e-05	0.00355641539765683	KIR3DX1	transcribed_unprocessed_pseudogene	ENST00000649033	ENST00000649033	NA	NA	NA	killer cell immunoglobulin like receptor, three Ig domains X1 (pseudogene) [Source:HGNC Symbol;Acc:HGNC:25043]
ENSG00000286857	10.448608582125	2.65676969128643	0.877800293486077	3.02662201300411	0.00247302990817649	0.0283250107010668		lncRNA	ENST00000655474	ENST00000655474	NA	NA	NA	novel transcript
ENSG00000287972	83.4599285794029	2.65549157528185	0.770685188439282	3.44562425114137	0.00056974197367691	0.0110987579303444		lncRNA	ENST00000671426	ENST00000671426	NA	NA	NA	novel transcript
ENSG00000250050	12.156054816917	2.65267360112094	0.768562447773638	3.4514743841638	0.00055753267728744	0.0109846914867701	MTND4P9	unprocessed_pseudogene	ENST00000507819	ENST00000507819	NA	NA	NA	MT-ND4 pseudogene 9 [Source:HGNC Symbol;Acc:HGNC:42226]
ENSG00000261235	103.167051261977	2.65114708314617	0.703637876124875	3.7677719933821	0.000164711036128696	0.00504834436093855	HSD17B2-AS1	lncRNA	ENST00000561826	ENST00000567021	NA	NA	NA	HSD17B2 antisense RNA 1 [Source:HGNC Symbol;Acc:HGNC:56281]
ENSG00000267055	56.045757150652	2.65035283241155	0.783298695729114	3.38357876358332	0.000715476821591378	0.0127815476435772		lncRNA	ENST00000590912	ENST00000590912	NA	NA	NA	novel transcript
ENSG00000224598	4.69750682053213	2.64903384107805	0.777138127372655	3.40870399710524	0.00065272262227225	0.0121618653584089	RPS5P2	processed_pseudogene	ENST00000415238	ENST00000415238	NA	NA	NA	RPS5 pseudogene 2 [Source:HGNC Symbol;Acc:HGNC:17222]
ENSG00000207444	11.6099564120814	2.64854870912872	0.77792872342766	3.40461616773688	0.000662571120351053	0.0122393390323094	SNORD56B	snoRNA	ENST00000384713	ENST00000384713	319139	GO:0005730	CC	small nucleolar RNA, C/D box 56B [Source:HGNC Symbol;Acc:HGNC:19771]
ENSG00000136541	80.9759468667141	2.6485471309305	0.60721782945518	4.36177431302846	1.29011912433674e-05	0.000879617824094954	ERMN	protein_coding	ENST00000410096	ENST00000410096	57471	GO:0001763	BP	ermin [Source:HGNC Symbol;Acc:HGNC:29208]
ENSG00000289849	19.800120445778	2.64807036792441	0.698710603242455	3.78993871802675	0.000150684455270257	0.00470625192363525		lncRNA	ENST00000701016	ENST00000701016	NA	NA	NA	novel transcript
ENSG00000254460	3.01537588148043	2.64780131683645	1.12052297140565	2.36300494001912	0.0181274279629839	0.0984301633163615		lncRNA	ENST00000533740	ENST00000533740	NA	NA	NA	novel transcript
ENSG00000289958	40.7190607447866	2.64628185939114	0.596043648069086	4.43974508907847	9.00654932944254e-06	0.000713729531948982		lncRNA	ENST00000702111	ENST00000702111	NA	NA	NA	novel transcript
ENSG00000197083	7.13458095269166	2.6441168473806	0.99643685992472	2.65357189574497	0.00796448016426656	0.059056405515334	ZNF300P1	transcribed_unprocessed_pseudogene	ENST00000356555	ENST00000356555	NA	NA	NA	zinc finger protein 300 pseudogene 1 [Source:HGNC Symbol;Acc:HGNC:27032]
ENSG00000184349	119.295080038457	2.64216230063731	0.720734412288177	3.66593055026887	0.000246440805153766	0.00660147141218421	EFNA5	protein_coding	ENST00000333274	ENST00000333274	1946	GO:0001934	BP	ephrin A5 [Source:HGNC Symbol;Acc:HGNC:3225]
ENSG00000261095	7.010957663521	2.64168372145116	0.739546617100047	3.57203137756195	0.000354222958042887	0.00828491961931247		lncRNA	ENST00000566092	ENST00000566092	101928708	NA	NA	novel transcript, antisense to C16orf95
ENSG00000204603	42.6570949692514	2.64101580920294	1.04648511807668	2.52370125822413	0.0116126567194211	0.0744033622718084	LINC01257	lncRNA	ENST00000376678	ENST00000376678	116437	NA	NA	long intergenic non-protein coding RNA 1257 [Source:HGNC Symbol;Acc:HGNC:26972]
ENSG00000171433	57.7288448748616	2.63807930926702	0.601277140040172	4.38745984770145	1.14682156402022e-05	0.000815656878396701	GLOD5	protein_coding	ENST00000303227	ENST00000303227	392465	NA	NA	glyoxalase domain containing 5 [Source:HGNC Symbol;Acc:HGNC:33358]
ENSG00000088826	846.972696398992	2.63664396620338	0.445928460288256	5.91270618721893	3.36532171092952e-09	3.04023163365373e-06	SMOX	protein_coding	ENST00000493223	ENST00000305958	54498	GO:0005654	MF	spermine oxidase [Source:HGNC Symbol;Acc:HGNC:15862]
ENSG00000254708	5.28499643606183	2.63616373216386	0.883854058772362	2.98257806930862	0.00285831739826366	0.0308968463965468	MMADHCP2	processed_pseudogene	ENST00000531489	ENST00000531489	NA	NA	NA	MMADHC pseudogene 2 [Source:HGNC Symbol;Acc:HGNC:54997]
ENSG00000231357	9.4582193971484	2.63583509740932	0.637741254531704	4.133079173849	3.57935356434818e-05	0.00183987937981914		processed_pseudogene	ENST00000438379	ENST00000438379	NA	NA	NA	prefoldin subunit 4 (PFDN4) pseudogene
ENSG00000242107	23.2363050196152	2.63459342772021	0.983066504996109	2.67997476704858	0.00736277100745059	0.0562500673750123	LINC01100	lncRNA	ENST00000471921	ENST00000471921	NA	NA	NA	long intergenic non-protein coding RNA 1100 [Source:HGNC Symbol;Acc:HGNC:49224]
ENSG00000236709	25.5970239912442	2.63325008598134	0.510550605734988	5.15766714680617	2.5004560781684e-07	6.45403434576381e-05	DAPK1-IT1	lncRNA	ENST00000431813	ENST00000431813	100506897	NA	NA	DAPK1 intronic transcript 1 [Source:HGNC Symbol;Acc:HGNC:43591]
ENSG00000258551	54.2827818728816	2.63004193319194	0.730026549940038	3.60266614057799	0.000314969959553523	0.0077128445820958	CRAT37	lncRNA	ENST00000555947	ENST00000687281	101926928	NA	NA	cervical cancer-associated transcript 37 [Source:NCBI gene (formerly Entrezgene);Acc:101926928]
ENSG00000275158	9.23885042956161	2.62967435045888	0.868819417294147	3.02672143153608	0.00247221674515563	0.0283246747948459	TRBV12-5	TR_V_gene	ENST00000621184	ENST00000621184	NA	GO:0002250	BP	T cell receptor beta variable 12-5 [Source:HGNC Symbol;Acc:HGNC:12187]
ENSG00000279176	162.687891568132	2.62792769645294	0.503052877548436	5.2239591775318	1.75137406311964e-07	4.97575404482349e-05		TEC	ENST00000623545	ENST00000623545	NA	NA	NA	TEC
ENSG00000287306	9.21087132885485	2.6265617631643	0.872454653554871	3.01054244190482	0.00260781499643979	0.0291842684147873		lncRNA	ENST00000654329	ENST00000654329	NA	NA	NA	novel transcript
ENSG00000166558	2.92596507277838	2.62480405441098	1.01890079117902	2.57611347163022	0.00999178501216866	0.0676148208239188	SLC38A8	protein_coding	ENST00000568003	ENST00000299709	146167	GO:0003333	BP	solute carrier family 38 member 8 [Source:HGNC Symbol;Acc:HGNC:32434]
ENSG00000251003	167.346619110765	2.62123498131702	1.11180284570789	2.35764370583894	0.0183913353281796	0.0992714961378161	ZFPM2-AS1	lncRNA	ENST00000647695	ENST00000520433	NA	NA	NA	ZFPM2 antisense RNA 1 [Source:HGNC Symbol;Acc:HGNC:50698]
ENSG00000207326	4.16313161932384	2.61906230324784	0.971270665149314	2.6965318702848	0.00700656925030965	0.054543168123479	Y_RNA	misc_RNA	ENST00000384596	ENST00000384596	NA	NA	NA	Y RNA [Source:RFAM;Acc:RF00019]
ENSG00000251322	1861.55351402121	2.61853140046462	0.538022463931457	4.86695551953423	1.13330523166486e-06	0.000168711648630913	SHANK3	protein_coding	ENST00000692848	ENST00000262795	85358	GO:0000165	BP	SH3 and multiple ankyrin repeat domains 3 [Source:HGNC Symbol;Acc:HGNC:14294]
ENSG00000007062	2773.71679842121	2.61517920700949	0.87685951852179	2.98243806649686	0.00285962499901782	0.0309017371305347	PROM1	protein_coding	ENST00000503884	ENST00000447510	8842	GO:0001750	BP	prominin 1 [Source:HGNC Symbol;Acc:HGNC:9454]
ENSG00000229418	241.539058845264	2.61366378083251	0.846247623545024	3.0885330819407	0.00201147297246724	0.0249353644367328		lncRNA	ENST00000454484	ENST00000454484	NA	NA	NA	novel transcript, antisense to DNTT
ENSG00000275649	102.53981979324	2.61235058230448	0.926254774497833	2.82033696800187	0.00479732436655252	0.042494805295526		lncRNA	ENST00000614030	ENST00000614030	NA	NA	NA	novel transcript
ENSG00000253054	4.67535608315545	2.6104647561169	0.94202499551688	2.77112047826773	0.00558637528394075	0.0469601758051641	RNU7-77P	snRNA	ENST00000517245	ENST00000517245	124901190	NA	NA	RNA, U7 small nuclear 77 pseudogene [Source:HGNC Symbol;Acc:HGNC:34173]
ENSG00000279887	18.5988197233536	2.6086178372324	0.667348358504509	3.90892972761357	9.27059236013149e-05	0.00343944687398061		TEC	ENST00000623121	ENST00000623121	NA	NA	NA	TEC
ENSG00000228986	7.74634067990217	2.6079298384989	0.815626998402421	3.19745403671909	0.00138646505041327	0.01981622625894	PHF10P1	processed_pseudogene	ENST00000452540	ENST00000452540	NA	NA	NA	PHD finger protein 10 pseudogene 1 [Source:HGNC Symbol;Acc:HGNC:23210]
ENSG00000270343	10.4286877374662	2.60771882844901	1.01547938609092	2.56796825633989	0.0102296523276149	0.0686914807495194	UNGP3	processed_pseudogene	ENST00000603734	ENST00000603734	NA	NA	NA	uracil-DNA glycosylase pseudogene 3 [Source:HGNC Symbol;Acc:HGNC:20036]
ENSG00000263508	14.2259579502295	2.60533031946463	0.588898256548599	4.42407545020406	9.68561687904806e-06	0.000742321001749424		lncRNA	ENST00000645807	ENST00000645807	NA	NA	NA	novel transcript
ENSG00000154928	803.183786928663	2.60221129694281	0.746582656330412	3.48549658216432	0.000491224498542882	0.010158131011461	EPHB1	protein_coding	ENST00000398015	ENST00000398015	2047	GO:0001525	BP	EPH receptor B1 [Source:HGNC Symbol;Acc:HGNC:3392]
ENSG00000160223	39.7838206981646	2.60181286840115	0.85477166431297	3.04386887987493	0.00233556911351099	0.0273664479526048	ICOSLG	protein_coding	ENST00000643466	ENST00000407780	23308	GO:0001817	BP	inducible T cell costimulator ligand [Source:HGNC Symbol;Acc:HGNC:17087]
ENSG00000226522	23.8116229592965	2.60175692003233	0.847399434412393	3.07028399403695	0.00213855315668889	0.0258457380836488	HDAC9-AS1	lncRNA	ENST00000447057	ENST00000447057	NA	NA	NA	HDAC9 antisense RNA 1 [Source:HGNC Symbol;Acc:HGNC:40664]
ENSG00000272840	20.3358003801306	2.59937531684452	1.01399723923076	2.56349348526477	0.0103624645578067	0.0691249647010442		lncRNA	ENST00000610060	ENST00000610060	105374312	NA	NA	novel transcript
ENSG00000230749	247.891138839707	2.59817610183822	0.589161859542221	4.40995298619128	1.03393063609741e-05	0.000764051481922616	MEIS1-AS2	lncRNA	ENST00000439433	ENST00000666153	100873998	NA	NA	MEIS1 antisense RNA 2 [Source:HGNC Symbol;Acc:HGNC:40370]
ENSG00000289003	13.8924522432033	2.59793819844782	0.792931587509051	3.27637117674817	0.00105150269718576	0.0163992669251206		lncRNA	ENST00000686975	ENST00000686975	NA	NA	NA	novel transcript
ENSG00000288758	5.8014771980524	2.59611438096189	1.05932827946473	2.45071752665159	0.0142571788196042	0.0848160502589004		lncRNA	ENST00000691200	ENST00000691200	NA	NA	NA	novel transcript, antisense to FSTL4
ENSG00000147488	396.538595490267	2.5934960927897	0.89428807485864	2.90006784804734	0.00373081894482535	0.0363339247294798	ST18	protein_coding	ENST00000689386	ENST00000689386	9705	GO:0000785	CC	ST18 C2H2C-type zinc finger transcription factor [Source:HGNC Symbol;Acc:HGNC:18695]
ENSG00000169398	1676.36241705344	2.59148424755023	0.764345273513353	3.39046284101206	0.000697747129162966	0.012668442016597	PTK2	protein_coding	ENST00000522684	ENST00000696786	5747	GO:0001525	MF	protein tyrosine kinase 2 [Source:HGNC Symbol;Acc:HGNC:9611]
ENSG00000184194	159.000873704507	2.59110830408214	0.843980916494029	3.07010295309262	0.00213984994138976	0.0258501289300183	GPR173	protein_coding	ENST00000332582	ENST00000332582	54328	GO:0004930	BP	G protein-coupled receptor 173 [Source:HGNC Symbol;Acc:HGNC:18186]
ENSG00000278972	13.8683131025808	2.59082586902425	0.853854930235759	3.03426937911912	0.00241119026716585	0.0279623785283393		TEC	ENST00000624645	ENST00000624645	NA	NA	NA	TEC
ENSG00000169306	52.7357320466426	2.59002755782131	0.82605499967268	3.13541780976763	0.00171609508260596	0.0225911883078503	IL1RAPL1	protein_coding	ENST00000378993	ENST00000378993	11141	GO:0005102	BP	interleukin 1 receptor accessory protein like 1 [Source:HGNC Symbol;Acc:HGNC:5996]
ENSG00000095627	3.89845590811293	2.5893425202192	1.05084020053043	2.46406876983977	0.0137369752000312	0.0829485324552873	TDRD1	protein_coding	ENST00000369282	ENST00000695399	56165	GO:0005737	BP	tudor domain containing 1 [Source:HGNC Symbol;Acc:HGNC:11712]
ENSG00000253647	51.8570313886102	2.58928493525732	0.551523515101558	4.69478610495969	2.66885835045237e-06	0.000304233013728539	KCNIP1-OT1	lncRNA	ENST00000518387	ENST00000518387	101928033	NA	NA	KCNIP1 overlapping transcript 1 [Source:HGNC Symbol;Acc:HGNC:40320]
ENSG00000254620	3.97333761137723	2.58855042128323	0.897602628679098	2.88384897567926	0.00392847104746162	0.0375057410227406		lncRNA	ENST00000525424	ENST00000525424	NA	NA	NA	novel transcript
ENSG00000277526	32.7475274522441	2.58692117127024	0.961182789187292	2.69139356256843	0.0071154199307156	0.055090870280732	LINC03021	lncRNA	ENST00000618928	ENST00000656311	101927815	NA	NA	long intergenic non-protein coding RNA 3021 [Source:NCBI gene (formerly Entrezgene);Acc:101927815]
ENSG00000286410	39.6585000227695	2.58670131754043	0.60985329795048	4.2415140267889	2.22017011539938e-05	0.00131521421787004		lncRNA	ENST00000671114	ENST00000671114	NA	NA	NA	novel transcript, antisense to SLC41A2
ENSG00000213540	6.76106813911988	2.58617939557498	0.753484142256435	3.43229439153189	0.00059849750301907	0.0114248841886408	TXN2P1	processed_pseudogene	ENST00000448052	ENST00000448052	NA	NA	NA	TXN2 pseudogene 1 [Source:HGNC Symbol;Acc:HGNC:54554]
ENSG00000231859	4.18726787872004	2.58587207153809	0.931880730374114	2.77489595744722	0.00552193700043218	0.0466603807517503		processed_pseudogene	ENST00000441505	ENST00000441505	NA	NA	NA	novel pseudogene
ENSG00000285873	15.119715555071	2.579881954191	0.735980875996339	3.50536547664839	0.000455980868084215	0.00967235912389237		lncRNA	ENST00000648968	ENST00000648968	NA	NA	NA	novel transcript
ENSG00000225885	487.903659294048	2.57808146514417	0.543170437674761	4.74635820789619	2.0711179247046e-06	0.000257188719337201		lncRNA	ENST00000420844	ENST00000430457	NA	NA	NA	novel transcript, antisense to SAMD12
ENSG00000198796	37.721490868388	2.57798542145271	0.5705154255808	4.51869538641877	6.22218377804802e-06	0.000556546616345404	ALPK2	protein_coding	ENST00000361673	ENST00000361673	115701	GO:0003007	MF	alpha kinase 2 [Source:HGNC Symbol;Acc:HGNC:20565]
ENSG00000263499	230.927540032371	2.57635479226573	0.666070067241501	3.86799365258311	0.000109734520637521	0.00380918985375357		lncRNA	ENST00000578662	ENST00000578662	101927539	NA	NA	novel transcript, antisense to MSI2
ENSG00000273079	6.99723623220532	2.57536641279659	0.850102949616071	3.0294759169577	0.00244978434467455	0.0281838290605411	GRIN2B	protein_coding	ENST00000637214	ENST00000609686	2904	GO:0001540	CC	glutamate ionotropic receptor NMDA type subunit 2B [Source:HGNC Symbol;Acc:HGNC:4586]
ENSG00000248309	1643.01623001392	2.57341352278009	0.481864717898282	5.34053112252	9.26746652538953e-08	3.16026566125406e-05	MEF2C-AS1	lncRNA	ENST00000511100	ENST00000514092	101929423	NA	NA	MEF2C antisense RNA 1 [Source:HGNC Symbol;Acc:HGNC:48908]
ENSG00000225680	10.386317122437	2.57268035052007	0.678364311006752	3.79247597312717	0.000149152685510742	0.00467862972536126		lncRNA	ENST00000436530	ENST00000436530	NA	NA	NA	novel transcript
ENSG00000204113	14.489948692812	2.57179784317118	0.58732870408912	4.37880496094558	1.19331867682063e-05	0.00083391325478956	BMP2KL	processed_pseudogene	ENST00000414251	ENST00000414251	NA	NA	NA	BMP2 inducible kinase like (pseudogene) [Source:HGNC Symbol;Acc:HGNC:17080]
ENSG00000285520	29.9457272797544	2.57145993499623	0.731955405811504	3.51313743238949	0.000442848351264026	0.00950847773100229		lncRNA	ENST00000649832	ENST00000649832	NA	NA	NA	novel transcript, antisense to CCDC3
ENSG00000198795	2093.1961772336	2.5663918353696	0.851036747645206	3.01560636772822	0.00256465966738818	0.0289162376726175	ZNF521	protein_coding	ENST00000361524	ENST00000361524	25925	GO:0000978	MF	zinc finger protein 521 [Source:HGNC Symbol;Acc:HGNC:24605]
ENSG00000135549	504.322657292008	2.56486065275485	0.73819104953504	3.47452147295793	0.00051176540183645	0.0104245516126054	PKIB	protein_coding	ENST00000615438	ENST00000368452	5570	GO:0004862	BP	cAMP-dependent protein kinase inhibitor beta [Source:HGNC Symbol;Acc:HGNC:9018]
ENSG00000128805	991.411733771025	2.5644758807066	0.473994215229455	5.41035269695258	6.29007437116747e-08	2.41806518592029e-05	ARHGAP22	protein_coding	ENST00000477708	ENST00000249601	58504	GO:0001525	BP	Rho GTPase activating protein 22 [Source:HGNC Symbol;Acc:HGNC:30320]
ENSG00000226965	15.9592250507386	2.56330684010823	0.81492293574756	3.14545919333686	0.00165826326637522	0.0221363137767768		lncRNA	ENST00000435466	ENST00000667232	NA	NA	NA	novel transcript
ENSG00000284240	26.5212185794896	2.56148867841552	1.07018907261837	2.39349171464485	0.0166888582521199	0.0935860617316273	LINC02801	lncRNA	ENST00000640491	ENST00000640362	101927844	NA	NA	long intergenic non-protein coding RNA 2801 [Source:HGNC Symbol;Acc:HGNC:54325]
ENSG00000285163	80.1670596298024	2.5602166601087	0.830687235951224	3.08204646623345	0.00205582743384967	0.0252084764674556		lncRNA	ENST00000646214	ENST00000646214	NA	NA	NA	novel transcript
ENSG00000165376	7.69066293546042	2.55963724258276	0.91216329242409	2.80611735184002	0.00501424273084647	0.0437351376591523	CLDN2	protein_coding	ENST00000541806	ENST00000336803	9075	GO:0005198	MF	claudin 2 [Source:HGNC Symbol;Acc:HGNC:2041]
ENSG00000276545	19.0901438263591	2.55723461519183	0.574439921340199	4.45170072655407	8.51928448987046e-06	0.000687171572156159	PCDHGB9P	unprocessed_pseudogene	ENST00000618012	ENST00000618012	NA	NA	NA	protocadherin gamma subfamily B, 9 pseudogene [Source:HGNC Symbol;Acc:HGNC:15688]
ENSG00000227242	66.9426258500511	2.55439488071766	0.966467263280073	2.64302266384932	0.00821695349446681	0.0600825235686064		unprocessed_pseudogene	ENST00000444082	ENST00000444082	NA	NA	NA	phosphodiesterase 4D interacting protein (PDE4DIP) pseudogene
ENSG00000204740	943.314301887033	2.55433465024429	0.731594890821994	3.49146048214516	0.000480387523834692	0.0100111208542621	MALRD1	protein_coding	ENST00000454679	ENST00000454679	340895	GO:0005794	CC	MAM and LDL receptor class A domain containing 1 [Source:HGNC Symbol;Acc:HGNC:24331]
ENSG00000258580	11.7872877535925	2.55214857216889	0.960438544581199	2.65727420725472	0.00787753401542919	0.0585966589505042		lncRNA	ENST00000557371	ENST00000557371	NA	NA	NA	novel transcript, antisense to AKAP6
ENSG00000081041	734.328631829242	2.55108949535821	0.815448411417507	3.12844989289219	0.00175730971020926	0.022930696813789	CXCL2	protein_coding	ENST00000508487	ENST00000508487	2920	GO:0002237	MF	C-X-C motif chemokine ligand 2 [Source:HGNC Symbol;Acc:HGNC:4603]
ENSG00000159708	29.3177186897707	2.54579633320522	0.582067018117904	4.37371686414561	1.22148783663892e-05	0.000845587824995859	LRRC36	protein_coding	ENST00000563303	ENST00000329956	55282	GO:0005515	MF	leucine rich repeat containing 36 [Source:HGNC Symbol;Acc:HGNC:25615]
ENSG00000158813	586.674231030798	2.54572174851736	0.855101403154601	2.97709925293749	0.00290989789573799	0.0312027240933331	EDA	protein_coding	ENST00000338901	ENST00000374552	1896	GO:0005102	BP	ectodysplasin A [Source:HGNC Symbol;Acc:HGNC:3157]
ENSG00000227110	280.806685290951	2.54130480643516	0.737281387445677	3.44685875665403	0.000567145005027655	0.0110790966098115	LMCD1-AS1	lncRNA	ENST00000441861	ENST00000654635	101927394	NA	NA	LMCD1 antisense RNA 1 [Source:HGNC Symbol;Acc:HGNC:44477]
ENSG00000188000	10.0734024263622	2.54066412009564	1.04544654655909	2.43021905659147	0.0150896996145304	0.0878779029828061	OR7D2	protein_coding	ENST00000642043	ENST00000641288	162998	GO:0004930	BP	olfactory receptor family 7 subfamily D member 2 [Source:HGNC Symbol;Acc:HGNC:8378]
ENSG00000185420	11275.2561592407	2.54026549573273	0.469877894997503	5.40622472939747	6.43670273001627e-08	2.44810416225667e-05	SMYD3	protein_coding	ENST00000482592	ENST00000490107	64754	GO:0000978	MF	SET and MYND domain containing 3 [Source:HGNC Symbol;Acc:HGNC:15513]
ENSG00000289860	9.63875085301506	2.5401839457954	0.745804182308056	3.4059663461986	0.000659303058064415	0.0122177309262645		lncRNA	ENST00000701135	ENST00000701135	NA	NA	NA	novel transcript
ENSG00000253513	3.86082184018868	2.53983190402346	0.968068520866096	2.62360757454561	0.00870039650163821	0.062121621810551	SQLE-DT	lncRNA	ENST00000523030	ENST00000523030	105375744	NA	NA	SQLE divergent transcript [Source:HGNC Symbol;Acc:HGNC:55534]
ENSG00000144218	11356.225094636	2.53929452488289	0.52202143102689	4.86434918943412	1.14834025465758e-06	0.000169373156907373	AFF3	protein_coding	ENST00000409236	ENST00000672756	3899	GO:0003690	MF	ALF transcription elongation factor 3 [Source:HGNC Symbol;Acc:HGNC:6473]
ENSG00000254380	6.24229635583024	2.53768119590056	1.04148533891613	2.43659809800253	0.014826147413249	0.0869736465787607		lncRNA	ENST00000520459	ENST00000655091	NA	NA	NA	novel transcript
ENSG00000236790	1403.28788682616	2.53260727788752	0.57562773357561	4.39973116332634	1.08385066521566e-05	0.000785875689485886	LINC00299	lncRNA	ENST00000430192	ENST00000430192	339789	NA	NA	long intergenic non-protein coding RNA 299 [Source:HGNC Symbol;Acc:HGNC:27940]
ENSG00000289594	11.4019154516537	2.53248679380937	0.729227829863164	3.47283344120942	0.000514994848809032	0.0104726245675651		lncRNA	ENST00000685848	ENST00000685848	NA	NA	NA	novel transcript, antisense to TMTC4
ENSG00000114279	18.9975558102526	2.53195087778313	0.758758872093467	3.33696378507879	0.000846989837703399	0.0143095602432897	FGF12	protein_coding	ENST00000454309	ENST00000445105	2257	GO:0005515	BP	fibroblast growth factor 12 [Source:HGNC Symbol;Acc:HGNC:3668]
ENSG00000250437	5.74372965739039	2.53151655024262	0.944655268179663	2.67983108284656	0.00736593200184188	0.0562500673750123	LINC02161	lncRNA	ENST00000503691	ENST00000503691	NA	NA	NA	long intergenic non-protein coding RNA 2161 [Source:HGNC Symbol;Acc:HGNC:53022]
ENSG00000182732	363.85456310471	2.53118565472625	0.879433579727257	2.87819991534921	0.00399951593694272	0.0378639004184862	RGS6	protein_coding	ENST00000553525	ENST00000553525	9628	GO:0003924	MF	regulator of G protein signaling 6 [Source:HGNC Symbol;Acc:HGNC:10002]
ENSG00000250891	713.436048506484	2.53022292344475	0.824339556854264	3.0693940408492	0.00214493477674332	0.0258795870091475	LINC02208	lncRNA	ENST00000506769	ENST00000660173	NA	NA	NA	long intergenic non-protein coding RNA 2208 [Source:HGNC Symbol;Acc:HGNC:52978]
ENSG00000196735	3202.68980066718	2.52866783163314	0.813719423395294	3.10754267248792	0.00188649748096994	0.0240206035843305	HLA-DQA1	protein_coding	ENST00000422863	ENST00000343139	3117	GO:0000139	CC	major histocompatibility complex, class II, DQ alpha 1 [Source:HGNC Symbol;Acc:HGNC:4942]
ENSG00000183535	5.35289556764312	2.52675290227493	1.03991397947281	2.42977106967624	0.0151083624606666	0.0879079944000807	COL18A1-AS1	lncRNA	ENST00000397787	ENST00000485206	378832	NA	NA	COL18A1 antisense RNA 1 [Source:HGNC Symbol;Acc:HGNC:23132]
ENSG00000264472	5.98403618705381	2.52673947469078	0.803655328253439	3.14405863541286	0.00166622049687778	0.0222179128690684		lncRNA	ENST00000584226	ENST00000584226	NA	NA	NA	novel transcript, antisense to CCDC102B
ENSG00000276393	2.81788414550921	2.52648004374339	0.922479662801949	2.73879213344328	0.00616653482004092	0.0501991219321916		unprocessed_pseudogene	ENST00000610567	ENST00000610567	NA	NA	NA	nuclear receptor subfamily 3, group C, member 1 (glucocorticoid receptor) (NR3C1) pseudogene
ENSG00000255776	11.1608508634564	2.52553752127339	0.814054912838794	3.1024166569627	0.00191947587709295	0.0242609934573734	VDAC2P2	processed_pseudogene	ENST00000544463	ENST00000544463	NA	NA	NA	VDAC2 pseudogene 2 [Source:HGNC Symbol;Acc:HGNC:32693]
ENSG00000280119	18.1699521884701	2.52213745329475	0.669049878559218	3.76973008159886	0.000163424192472495	0.00501741428987773		TEC	ENST00000625132	ENST00000625132	285097	NA	NA	TEC
ENSG00000164078	39.525329317761	2.52070804452906	0.93105762186986	2.70735987260023	0.00678206951123787	0.0532934202818016	MST1R	protein_coding	ENST00000296474	ENST00000296474	4486	GO:0001725	BP	macrophage stimulating 1 receptor [Source:HGNC Symbol;Acc:HGNC:7381]
ENSG00000241211	45.0208659076118	2.51989614894202	0.772755589874612	3.26092257624549	0.00111050358184865	0.0170472206600183	IQCJ-SCHIP1-AS1	lncRNA	ENST00000460574	ENST00000460574	NA	NA	NA	IQCJ-SCHIP1 readthrough antisense RNA 1 [Source:HGNC Symbol;Acc:HGNC:41303]
ENSG00000162772	1798.03881526247	2.51979199655073	0.727691180485559	3.46272163813964	0.000534741298804058	0.0107040472503264	ATF3	protein_coding	ENST00000366981	ENST00000341491	467	GO:0000122	BP	activating transcription factor 3 [Source:HGNC Symbol;Acc:HGNC:785]
ENSG00000207160	2.78131869428754	2.51937510558329	1.03724815878877	2.42890294307703	0.0151445859292308	0.0880573486755158	RNU6-1289P	snRNA	ENST00000384431	ENST00000384431	NA	NA	NA	RNA, U6 small nuclear 1289, pseudogene [Source:HGNC Symbol;Acc:HGNC:48252]
ENSG00000237365	2.9400066772095	2.51637720408607	1.00002794223873	2.51630689283816	0.0118591868257072	0.0754079843627938		lncRNA	ENST00000456701	ENST00000456701	NA	NA	NA	novel transcript, antisense to CAMTA1
ENSG00000159618	1712.21307669038	2.51402558268418	0.631996611889706	3.97790990550899	6.95237031305238e-05	0.00283236588086201	ADGRG5	protein_coding	ENST00000349457	ENST00000349457	221188	GO:0004930	MF	adhesion G protein-coupled receptor G5 [Source:HGNC Symbol;Acc:HGNC:19010]
ENSG00000214402	20.5757180992822	2.51207600077877	0.987904010300946	2.54283409580807	0.0109957424316731	0.0717742320287103	LCNL1	protein_coding	ENST00000482657	ENST00000408973	401562	GO:0036094	MF	lipocalin like 1 [Source:HGNC Symbol;Acc:HGNC:34436]
ENSG00000251012	76.1461396807947	2.5103502942478	0.813395955374206	3.08625863905717	0.0020269242903833	0.0250324457133598		protein_coding	ENST00000490594	ENST00000490594	NA	NA	NA	novel chromosome 3 open reading frame 30 (C3orf30) and uroplakin 1B (UPK1B)
ENSG00000162366	63.4836604798019	2.5098513533424	0.742118684808009	3.38200803284143	0.000719580404056542	0.0128029332747352	PDZK1IP1	protein_coding	ENST00000294338	ENST00000294338	10158	GO:0005515	MF	PDZK1 interacting protein 1 [Source:HGNC Symbol;Acc:HGNC:16887]
ENSG00000267406	4.24205824597063	2.50933162875677	0.948680652325434	2.64507516054619	0.00816727736099542	0.0598646520723997		lncRNA	ENST00000589512	ENST00000589512	NA	NA	NA	novel transcript
ENSG00000237473	8.68687226790077	2.50667374810667	0.839767721363513	2.98496082230528	0.00283614646134282	0.0307399485684116		lncRNA	ENST00000447709	ENST00000447709	NA	NA	NA	novel transcript
ENSG00000289930	10.0682605835504	2.50508228100653	0.97619965803899	2.56615771207991	0.0102832060873149	0.0688902364054895		lncRNA	ENST00000701822	ENST00000701822	NA	NA	NA	novel transcript
ENSG00000197915	22.1820201727479	2.50256898646811	0.881451040697348	2.83914689633611	0.00452343277975164	0.041111359891626	HRNR	protein_coding	ENST00000368801	ENST00000368801	388697	GO:0001533	CC	hornerin [Source:HGNC Symbol;Acc:HGNC:20846]
ENSG00000201547	3.98602334605988	2.50206474756752	1.00230328669291	2.49631501840432	0.0125491101639963	0.078279759172479	Y_RNA	misc_RNA	ENST00000364677	ENST00000364677	NA	NA	NA	Y RNA [Source:RFAM;Acc:RF00019]
ENSG00000236939	350.00243189228	2.50191732228158	0.994081801498499	2.51681231716559	0.011842189246911	0.0753396744060523	BAALC-AS2	lncRNA	ENST00000436771	ENST00000521246	NA	NA	NA	BAALC antisense RNA 2 [Source:HGNC Symbol;Acc:HGNC:28595]
ENSG00000114204	797.200603123516	2.498398540174	0.483377017971328	5.16863327648355	2.35812096818245e-07	6.18911764442878e-05	SERPINI2	protein_coding	ENST00000461846	ENST00000264677	5276	GO:0004867	MF	serpin family I member 2 [Source:HGNC Symbol;Acc:HGNC:8945]
ENSG00000182256	4.45241839428277	2.4976391437556	0.921862010031847	2.70934165479855	0.00674168769568928	0.0530873014973693	GABRG3	protein_coding	ENST00000615808	ENST00000615808	2567	GO:0004890	BP	gamma-aminobutyric acid type A receptor subunit gamma3 [Source:HGNC Symbol;Acc:HGNC:4088]
ENSG00000237317	5.73252376896934	2.49575462831195	0.922107822715295	2.70657570278799	0.00679810809175068	0.0533803637556503		processed_pseudogene	ENST00000423946	ENST00000423946	NA	NA	NA	forty-two-three domain containing 1 (FYTTD1) pseudogene
ENSG00000152207	1557.15474613633	2.49554252170662	0.684176820938173	3.64751106049547	0.000264792916282518	0.00694680599192446	CYSLTR2	protein_coding	ENST00000614739	ENST00000682523	57105	GO:0001631	MF	cysteinyl leukotriene receptor 2 [Source:HGNC Symbol;Acc:HGNC:18274]
ENSG00000259995	6.32131102320386	2.49429229449303	1.04090822300396	2.39626533768245	0.0165630953647125	0.0930884817394321		lncRNA	ENST00000567777	ENST00000567777	NA	NA	NA	novel transcript
ENSG00000261837	13.3310447404542	2.49405082578591	0.669058912048162	3.72769987944855	0.000193235294505972	0.0056267128140756		lncRNA	ENST00000568764	ENST00000568764	NA	NA	NA	novel transcript, sense intronic to WWOX
ENSG00000212181	5.06539956864076	2.49374436298313	0.907721837807395	2.74725610767146	0.00600961867293308	0.0494115086154971		snoRNA	ENST00000390879	ENST00000390879	124900532	NA	NA	NULL
ENSG00000232124	4.13151207617467	2.49101124267374	0.846314815640453	2.94336244224752	0.00324668070435051	0.0332451272123576		lncRNA	ENST00000665511	ENST00000423967	105372832	NA	NA	novel transcript
ENSG00000251171	169.219881058663	2.48942856633306	0.394173491708586	6.31556565496673	2.6917507744321e-10	5.55317850374858e-07		lncRNA	ENST00000510225	ENST00000510225	NA	NA	NA	novel transcript
ENSG00000235888	358.443476508972	2.48899477977558	0.535968383813327	4.64392090083148	3.41858488681247e-06	0.000356005716051457	LINC02940	lncRNA	ENST00000655642	ENST00000652155	NA	NA	NA	long intergenic non-protein coding RNA 2940 [Source:HGNC Symbol;Acc:HGNC:55955]
ENSG00000231566	43.0293063064189	2.48850255668963	0.609835044979667	4.0806158602653	4.49165335391479e-05	0.00215265763391333	LINC02595	lncRNA	ENST00000456532	ENST00000456532	NA	NA	NA	long intergenic non-protein coding RNA 2595 [Source:HGNC Symbol;Acc:HGNC:53946]
ENSG00000250603	6.20314608707716	2.48627482273153	0.764588750480619	3.25178054368269	0.00114684533739569	0.0174127744168616		lncRNA	ENST00000507509	ENST00000507509	NA	NA	NA	novel transcript
ENSG00000253284	90.7732644903973	2.48594538381128	0.492313849582975	5.0495134067771	4.42936852743923e-07	9.094298926565e-05		lncRNA	ENST00000501211	ENST00000501211	NA	NA	NA	novel transcript
ENSG00000236039	36.4466493721957	2.48531991469459	0.625249776642166	3.97492331471387	7.04019368172443e-05	0.00285847684137971	LINC02889	lncRNA	ENST00000636929	ENST00000636929	101927630	NA	NA	long intergenic non-protein coding RNA 2889 [Source:HGNC Symbol;Acc:HGNC:55071]
ENSG00000230647	30.5503534705575	2.48455360492949	0.853747480524698	2.91017386476213	0.00361227746367214	0.0355385947256347		lncRNA	ENST00000436469	ENST00000700765	NA	NA	NA	novel transcript
ENSG00000264339	15.6710590667048	2.48347667479292	0.551796299708817	4.50071281033138	6.77259600667276e-06	0.00059401584780856		lncRNA	ENST00000579595	ENST00000579595	NA	NA	NA	novel transcript, antisense to YES1
ENSG00000252451	7.27394779250624	2.48171333782487	0.808393123359813	3.06993375637643	0.00214106253839786	0.0258501289300183	RNA5SP168	rRNA_pseudogene	ENST00000516642	ENST00000516642	NA	NA	NA	RNA, 5S ribosomal pseudogene 168 [Source:HGNC Symbol;Acc:HGNC:43068]
ENSG00000242163	9.95493560992327	2.48040760846722	0.853154491761051	2.90733698576356	0.00364520278048686	0.0357651500612743		processed_pseudogene	ENST00000469473	ENST00000469473	NA	NA	NA	ribosomal protein S24 (RPS24) pseudogene
ENSG00000142156	456.463233728709	2.4798913846988	1.04068904103189	2.38293216025402	0.0171753591412977	0.0953376084713462	COL6A1	protein_coding	ENST00000361866	ENST00000361866	1291	GO:0000302	BP	collagen type VI alpha 1 chain [Source:HGNC Symbol;Acc:HGNC:2211]
ENSG00000285595	74.2369280725022	2.47938682811508	0.817930708556018	3.03129201799039	0.00243509615908673	0.028122286610661		lncRNA	ENST00000649176	ENST00000649176	NA	NA	NA	novel transcript, antisense to ZNF521
ENSG00000267653	102.186690573154	2.47854202705718	0.53740351870044	4.61206884735486	3.98680890147129e-06	0.000395643446830515		lncRNA	ENST00000585537	ENST00000585537	NA	NA	NA	novel transcript
ENSG00000166317	43.2310232776526	2.47772002634283	0.42773508246312	5.79265093729239	6.92840109249704e-09	4.90911180153869e-06	SYNPO2L	protein_coding	ENST00000372873	ENST00000394810	79933	GO:0003007	BP	synaptopodin 2 like [Source:HGNC Symbol;Acc:HGNC:23532]
ENSG00000243978	6.49198863954491	2.47713736227133	0.783482272062009	3.16170186691254	0.00156850060209399	0.0213722993051541	RTL9	protein_coding	ENST00000520821	ENST00000520821	57529	NA	NA	retrotransposon Gag like 9 [Source:HGNC Symbol;Acc:HGNC:29245]
ENSG00000160282	39.3050897579494	2.47645807884706	0.723783602780118	3.42154487796458	0.000622664478840104	0.0117680981210073	FTCD	protein_coding	ENST00000494498	ENST00000397746	10841	GO:0000139	CC	formimidoyltransferase cyclodeaminase [Source:HGNC Symbol;Acc:HGNC:3974]
ENSG00000167600	208.219461723624	2.47587305016085	0.562220053367564	4.40374375714804	1.0639860905886e-05	0.000778303671447564	CYP2S1	protein_coding	ENST00000597754	ENST00000310054	29785	GO:0004497	BP	cytochrome P450 family 2 subfamily S member 1 [Source:HGNC Symbol;Acc:HGNC:15654]
ENSG00000270569	3.48531825246083	2.47383010437274	0.959333508285386	2.57869665033822	0.00991738338820803	0.0672905293919165		processed_pseudogene	ENST00000605793	ENST00000605793	NA	NA	NA	proteasome maturation protein (POMP) pseudogene
ENSG00000180537	48.1761368340845	2.47204550173378	1.03443631300201	2.3897512787034	0.0168597862072382	0.0943095706989733	RNF182	protein_coding	ENST00000488763	ENST00000488300	221687	GO:0004842	MF	ring finger protein 182 [Source:HGNC Symbol;Acc:HGNC:28522]
ENSG00000256481	35.5356229128343	2.47125094839448	0.490591641926894	5.03728709826397	4.72176290583032e-07	9.5321577857589e-05		lncRNA	ENST00000544948	ENST00000544948	NA	NA	NA	novel transcript, antisense to MACROD1
ENSG00000240392	4.16477106893784	2.47091731961979	0.823431689353356	3.00075568085096	0.0026931055246721	0.0297882036239825	RPL9P3	processed_pseudogene	ENST00000475906	ENST00000475906	NA	NA	NA	ribosomal protein L9 pseudogene 3 [Source:HGNC Symbol;Acc:HGNC:23555]
ENSG00000111962	1197.72711282777	2.47041107456045	0.633474501556437	3.89977981511598	9.62802074703675e-05	0.00352329403519057	UST	protein_coding	ENST00000367463	ENST00000367463	10090	GO:0000139	CC	uronyl 2-sulfotransferase [Source:HGNC Symbol;Acc:HGNC:17223]
ENSG00000287786	18.5806689959789	2.46967611821005	1.01367183778757	2.4363665104876	0.0148356441048485	0.0869869925965934		lncRNA	ENST00000669245	ENST00000669245	NA	NA	NA	novel transcript, antisense to C4orf50and JAKMIP1
ENSG00000280365	9.97272539019133	2.46926064599659	0.828970708040028	2.97870675290176	0.00289467665634519	0.0311130385644527		TEC	ENST00000624404	ENST00000624404	NA	NA	NA	TEC
ENSG00000235669	316.606878464337	2.46744312286111	0.559510970344169	4.40999954182012	1.03370837857817e-05	0.000764051481922616	CHN2-AS1	lncRNA	ENST00000446246	ENST00000446246	NA	NA	NA	CHN2 antisense RNA 1 [Source:HGNC Symbol;Acc:HGNC:40149]
ENSG00000234981	4.19649619164551	2.46671674980547	0.935622064599502	2.63644567944361	0.00837796128914309	0.0607070401332414	RPL7AP20	processed_pseudogene	ENST00000428027	ENST00000428027	NA	NA	NA	ribosomal protein L7a pseudogene 20 [Source:HGNC Symbol;Acc:HGNC:36358]
ENSG00000233411	35.4628756648556	2.46661926175032	0.725069359914345	3.40190800786522	0.000669171585549157	0.0123059462673813		lncRNA	ENST00000417969	ENST00000417969	NA	NA	NA	novel transcript
ENSG00000114107	1675.84492242898	2.46514940499563	0.63674011674176	3.87151577257289	0.000108160657081306	0.00378503949736024	CEP70	protein_coding	ENST00000264982	ENST00000264982	80321	GO:0005515	BP	centrosomal protein 70 [Source:HGNC Symbol;Acc:HGNC:29972]
ENSG00000288971	16.3444126558801	2.46426652580713	0.890114916645793	2.76848132721243	0.0056318212762014	0.0471501185190714		lncRNA	ENST00000687842	ENST00000687842	NA	NA	NA	novel transcript
ENSG00000270480	4.02139566910494	2.46325577823632	0.974041550427754	2.52890215736133	0.0114419919269655	0.0738106150550935		processed_pseudogene	ENST00000603927	ENST00000603927	NA	NA	NA	PQ loop repeat containing 1 (PQLC1) pseudogene
ENSG00000224557	37.7471381730017	2.46166765730786	0.784277222690576	3.13877234488942	0.00169657198010976	0.0224486726742022	HLA-DPB2	transcribed_unprocessed_pseudogene	ENST00000470997	ENST00000470997	3116	NA	NA	major histocompatibility complex, class II, DP beta 2 (pseudogene) [Source:HGNC Symbol;Acc:HGNC:4941]
ENSG00000197461	30.8506643998629	2.4586786070274	0.766132176227026	3.20920943320206	0.00133100502162229	0.0192774338522418	PDGFA	protein_coding	ENST00000402802	ENST00000402802	5154	GO:0000139	CC	platelet derived growth factor subunit A [Source:HGNC Symbol;Acc:HGNC:8799]
ENSG00000203397	4.06176101067052	2.45775397327026	0.813498254436601	3.02121603810006	0.00251761660389866	0.0285640796227573	SHISA5P2	processed_pseudogene	ENST00000366220	ENST00000366220	NA	NA	NA	SHISA5 pseudogene 2 [Source:HGNC Symbol;Acc:HGNC:54993]
ENSG00000262097	9.49361095561485	2.4568350500394	0.853492274919715	2.87856741324403	0.00399485889710124	0.0378517168579143	LINC02185	lncRNA	ENST00000668908	ENST00000668908	NA	NA	NA	long intergenic non-protein coding RNA 2185 [Source:HGNC Symbol;Acc:HGNC:53047]
ENSG00000048052	9905.63355673848	2.45660349450656	0.65987480172452	3.72283270718394	0.000197000058909244	0.00569959497897874	HDAC9	protein_coding	ENST00000417496	ENST00000686413	9734	GO:0000118	CC	histone deacetylase 9 [Source:HGNC Symbol;Acc:HGNC:14065]
ENSG00000259884	470.228598573328	2.45410845261735	0.622719333638488	3.94095432733433	8.11580793681843e-05	0.00315008416331762	NR4A1AS	lncRNA	ENST00000564531	ENST00000564531	115409980	NA	NA	NR4A1 antisense RNA [Source:HGNC Symbol;Acc:HGNC:54409]
ENSG00000228401	218.173839440098	2.45321182408087	0.722707719636991	3.39447297631343	0.00068760825772592	0.0125627243969829		lncRNA	ENST00000674687	ENST00000674687	NA	NA	NA	novel transcript, antisense to EGFL7 (HSPC324)
ENSG00000127124	4930.44410498081	2.45274744125079	0.380203556540652	6.45114281299086	1.1100982628765e-10	3.53581113881811e-07	HIVEP3	protein_coding	ENST00000643665	ENST00000372583	59269	GO:0000978	MF	HIVEP zinc finger 3 [Source:HGNC Symbol;Acc:HGNC:13561]
ENSG00000188011	29.6311296657197	2.45193982774922	0.735801851444618	3.33233712708831	0.000861198629468678	0.0144275724035606	RTP5	protein_coding	ENST00000419912	ENST00000343216	285093	GO:0001580	BP	receptor transporter protein 5 (putative) [Source:HGNC Symbol;Acc:HGNC:26585]
ENSG00000259079	91.7371644473961	2.45029816776044	0.485743668053059	5.04442636912107	4.54883954704586e-07	9.23465538607018e-05		processed_pseudogene	ENST00000554427	ENST00000554427	NA	NA	NA	PDZ domain-containing protein 11 (PDZD11) pseudogene
ENSG00000255186	26.8712038062183	2.44630004669405	0.829970775485697	2.94745323443766	0.00320403211271548	0.0330144964809866		lncRNA	ENST00000533203	ENST00000533203	NA	NA	NA	novel transcript
ENSG00000158321	17655.7153883112	2.44613404428251	0.498019730146579	4.91172115522924	9.02803826497805e-07	0.000143789971362089	AUTS2	protein_coding	ENST00000644939	ENST00000342771	26053	GO:0001764	BP	activator of transcription and developmental regulator AUTS2 [Source:HGNC Symbol;Acc:HGNC:14262]
ENSG00000107438	2602.29304940502	2.44540679380558	0.417249266736395	5.8607815249931	4.60693771852414e-09	3.61905003036061e-06	PDLIM1	protein_coding	ENST00000329399	ENST00000329399	9124	GO:0001666	BP	PDZ and LIM domain 1 [Source:HGNC Symbol;Acc:HGNC:2067]
ENSG00000257008	6.51057413226359	2.44453314691879	0.84834661925833	2.88152636130728	0.00395754128564707	0.0376530715552462	GPR142	protein_coding	ENST00000582579	ENST00000582579	350383	GO:0004930	MF	G protein-coupled receptor 142 [Source:HGNC Symbol;Acc:HGNC:20088]
ENSG00000279030	78.5106962170356	2.44114561120586	1.01428518261506	2.40676454023713	0.0160945428771928	0.0913783936122082		TEC	ENST00000623886	ENST00000623886	NA	NA	NA	novel transcript
ENSG00000212418	4.01209837375127	2.43884989721538	0.81027928798672	3.00988798970183	0.00261344049469513	0.0292381689524159	RNY4P36	misc_RNA	ENST00000391116	ENST00000391116	NA	NA	NA	RNY4 pseudogene 36 [Source:HGNC Symbol;Acc:HGNC:50884]
ENSG00000272137	5.6184210015295	2.43857812495144	0.983924043955763	2.47842111383658	0.0131965289154728	0.0806613276200147		lncRNA	ENST00000607718	ENST00000607718	NA	NA	NA	novel transcript
ENSG00000257803	19.7089738521029	2.43825409546341	0.98297649630955	2.48048056552471	0.0131205416034403	0.0803599815901557	PIGAP1	processed_pseudogene	ENST00000547380	ENST00000547380	NA	NA	NA	phosphatidylinositol glycan anchor biosynthesis class A pseudogene 1 [Source:HGNC Symbol;Acc:HGNC:8958]
ENSG00000288887	420.247460019465	2.43786198471831	0.599371369408312	4.06736475772095	4.7547786856639e-05	0.00221759361866141		lncRNA	ENST00000690973	ENST00000690973	105374981	NA	NA	novel transcript, antisense to RIPOR2
ENSG00000003096	626.576890800528	2.43663036751616	0.597578580104739	4.07750620360102	4.55213157299677e-05	0.00217087660339073	KLHL13	protein_coding	ENST00000371882	ENST00000540167	90293	GO:0004842	CC	kelch like family member 13 [Source:HGNC Symbol;Acc:HGNC:22931]
ENSG00000140022	3295.23768833809	2.43538745964786	0.788214919786621	3.08975052173225	0.00200324683944845	0.02490172954603	STON2	protein_coding	ENST00000614646	ENST00000614646	85439	GO:0005515	MF	stonin 2 [Source:HGNC Symbol;Acc:HGNC:30652]
ENSG00000130226	54.0842946023482	2.43448005819029	0.377870240445701	6.4426350572588	1.17416796728518e-10	3.53581113881811e-07	DPP6	protein_coding	ENST00000706130	ENST00000377770	1804	GO:0005886	MF	dipeptidyl peptidase like 6 [Source:HGNC Symbol;Acc:HGNC:3010]
ENSG00000065923	3426.38439608758	2.42983364745256	0.379272800169921	6.40655920056475	1.48840332351429e-10	4.0038106969988e-07	SLC9A7	protein_coding	ENST00000328306	ENST00000616978	84679	GO:0000139	CC	solute carrier family 9 member A7 [Source:HGNC Symbol;Acc:HGNC:17123]
ENSG00000131721	16.8234113227812	2.42831958143597	0.624825050809182	3.88639920613165	0.000101742142498409	0.0036365519894387	RHOXF2	protein_coding	ENST00000371388	ENST00000371388	84528	GO:0000785	CC	Rhox homeobox family member 2 [Source:HGNC Symbol;Acc:HGNC:30011]
ENSG00000261633	91.1983929985605	2.4280073219517	0.838069935172194	2.89714165853334	0.0037657967204874	0.0365443201533859		lncRNA	ENST00000563251	ENST00000563251	NA	NA	NA	novel transcript, antisense to GPR56
ENSG00000232696	6.25574337391229	2.4273016713471	0.758804842052764	3.19884842165822	0.0013797769329043	0.0197463838603682		lncRNA	ENST00000444077	ENST00000444077	NA	NA	NA	novel transcript
ENSG00000274370	32.1998252310478	2.42685874751569	0.672725929497748	3.60749993586179	0.000309161614523715	0.00762113088433195		lncRNA	ENST00000619443	ENST00000619443	NA	NA	NA	novel transcript
ENSG00000200652	4.34021728755499	2.42525829250186	0.909372340732304	2.66695849859348	0.00765411229761506	0.0576587454631265		snoRNA	ENST00000363782	ENST00000363782	NA	NA	NA	NULL
ENSG00000254197	261.264161301815	2.42473918893601	0.322547554778717	7.51746262841614	5.58495154710124e-14	6.72726030353502e-10		lncRNA	ENST00000520606	ENST00000520606	NA	NA	NA	novel transcript
ENSG00000230387	16.1081508886912	2.42451307206225	0.908462620628431	2.66880883925096	0.0076120760230805	0.0574019155196237		lncRNA	ENST00000669811	ENST00000661992	100505664	NA	NA	novel transcript
ENSG00000227659	7.2695934346866	2.4232857125511	0.780173126355991	3.10608713718417	0.00189580841119424	0.024071304549162	CLYBL-AS2	lncRNA	ENST00000430125	ENST00000430125	100874063	NA	NA	CLYBL antisense RNA 2 [Source:HGNC Symbol;Acc:HGNC:39894]
ENSG00000232036	5.65778601633868	2.42241734647825	0.90978259264599	2.66263321155986	0.00775318745344369	0.0581505151136657		processed_pseudogene	ENST00000245811	ENST00000245811	NA	NA	NA	novel pseudogene
ENSG00000286420	4.03722254942002	2.42143639251976	0.88396915442875	2.73927702158858	0.00615744666666365	0.050170347857172		lncRNA	ENST00000658284	ENST00000658284	NA	NA	NA	novel transcript
ENSG00000270632	2.72527836158477	2.4197621417423	0.966560071002024	2.50347827759298	0.0122979229343891	0.0772784907048574		processed_pseudogene	ENST00000603008	ENST00000603008	NA	NA	NA	novel pseudogene
ENSG00000287427	26.5667268328334	2.41971784420684	0.603467571400841	4.00968993013146	6.07985326779023e-05	0.00259254344294723		lncRNA	ENST00000670526	ENST00000670526	NA	NA	NA	novel transcript, antisense to PTPRE
ENSG00000241449	137.299373861776	2.41935884609889	0.686830289711182	3.52249876329165	0.000427499036272024	0.00930608745465412		lncRNA	ENST00000492054	ENST00000668040	NA	NA	NA	novel transcript
ENSG00000180611	356.136425730195	2.41921292846935	0.864549845540075	2.79823418042264	0.00513828438674036	0.0444819883420374	MB21D2	protein_coding	ENST00000392452	ENST00000392452	151963	GO:0005515	MF	Mab-21 domain containing 2 [Source:HGNC Symbol;Acc:HGNC:30438]
ENSG00000257239	1526.12531555079	2.41882036815044	1.01517424716294	2.38266521723754	0.0171878173417867	0.0953376084713462		lncRNA	ENST00000550874	ENST00000550874	NA	NA	NA	novel transcript
ENSG00000205116	12.3247948584005	2.41666488976401	0.809880030336934	2.98397886012649	0.00284526428955974	0.0307925937009676	TMEM88B	protein_coding	ENST00000378821	ENST00000378821	643965	GO:0005886	MF	transmembrane protein 88B [Source:HGNC Symbol;Acc:HGNC:37099]
ENSG00000270110	144.540565176762	2.41639550555134	0.64225922834417	3.76233676202852	0.000168333176079136	0.00512458942779751		lncRNA	ENST00000602778	ENST00000602778	NA	NA	NA	novel transcript, antisense to OBSCN
ENSG00000290775	6.50007494938072	2.41635212496147	0.803391622834851	3.00768897295085	0.00263242402572287	0.0293624319128617		lncRNA	ENST00000529093	ENST00000529093	NA	NA	NA	novel transcript
ENSG00000279822	20.3844453911339	2.41412988729905	0.836474227108549	2.88607802734581	0.00390075436537648	0.0373397774164886		TEC	ENST00000624848	ENST00000624848	NA	NA	NA	TEC
ENSG00000282142	20.0824723511151	2.413786639276	0.972258010369127	2.48266058343873	0.0130405275902747	0.0801154233184378		lncRNA	ENST00000631520	ENST00000661057	NA	NA	NA	novel transcript
ENSG00000211881	3.78336326416987	2.41156366656794	0.958931524733624	2.51484449553145	0.0119084896291577	0.0756017535557349	TRAJ8	TR_J_pseudogene	ENST00000390529	ENST00000390529	NA	NA	NA	T cell receptor alpha joining 8 [Source:HGNC Symbol;Acc:HGNC:12096]
ENSG00000165061	11.7894700594506	2.41147492796613	0.860409326398779	2.80270663506089	0.00506757419120016	0.0440408516049084	ZMAT4	protein_coding	ENST00000315769	ENST00000297737	79698	GO:0003677	MF	zinc finger matrin-type 4 [Source:HGNC Symbol;Acc:HGNC:25844]
ENSG00000198547	199.956691772971	2.40723102453634	0.62514786616796	3.85065862784147	0.00011780060186653	0.00400308196073034	C20orf203	protein_coding	ENST00000608990	ENST00000608990	284805	GO:0005737	CC	chromosome 20 open reading frame 203 [Source:HGNC Symbol;Acc:HGNC:26592]
ENSG00000259674	81.414661111858	2.40686334145916	0.962908272579965	2.49957696906097	0.0124341685226598	0.0777641249108404	RPL7AP75	processed_pseudogene	ENST00000557949	ENST00000557949	NA	NA	NA	ribosomal protein L7a pseudogene 75 [Source:HGNC Symbol;Acc:HGNC:55898]
ENSG00000243944	16.9443165145366	2.40681733749861	0.520183955366391	4.62685808100977	3.71254722629327e-06	0.000376844400475656		lncRNA	ENST00000487840	ENST00000487840	NA	NA	NA	novel transcript, antisense to PFN2
ENSG00000254119	8.48942582456988	2.40515791930955	0.723732570930289	3.32326886465528	0.000889691181687588	0.0147341340703312	LINC02842	lncRNA	ENST00000520862	ENST00000518593	NA	NA	NA	long intergenic non-protein coding RNA 2842 [Source:HGNC Symbol;Acc:HGNC:54378]
ENSG00000132164	22.3899124843924	2.40380020200854	0.904124779071637	2.65870403914466	0.00784418366662094	0.0585101773657666	SLC6A11	protein_coding	ENST00000454147	ENST00000254488	6538	GO:0003333	BP	solute carrier family 6 member 11 [Source:HGNC Symbol;Acc:HGNC:11044]
ENSG00000207595	8.71515559059925	2.40156376008105	0.862889764922328	2.78316403520817	0.00538315820545647	0.0459545960104831	MIR181A2	miRNA	ENST00000384863	ENST00000384863	406954	GO:0003730	BP	microRNA 181a-2 [Source:HGNC Symbol;Acc:HGNC:31549]
ENSG00000259476	4.67651022404996	2.4007944518178	0.928024324309847	2.58699517774302	0.00968169471119481	0.0662233049562248		lncRNA	ENST00000561202	ENST00000561202	NA	NA	NA	novel transcript, sense intronic to LIPC
ENSG00000230437	5.39984222592456	2.39916035769193	0.984929446773622	2.43587027025232	0.0148560114409646	0.0870087465522073		lncRNA	ENST00000442389	ENST00000442389	NA	NA	NA	novel transcript
ENSG00000152128	534.334213326762	2.39619258155962	0.661272368228609	3.62360911582991	0.000290520558072307	0.00736074272993385	TMEM163	protein_coding	ENST00000281924	ENST00000281924	81615	GO:0005515	BP	transmembrane protein 163 [Source:HGNC Symbol;Acc:HGNC:25380]
ENSG00000227107	8.84049726893543	2.39446780872084	0.713018662974985	3.3582119698385	0.000784484304439596	0.0135507288839528		lncRNA	ENST00000417947	ENST00000417947	NA	NA	NA	novel transcript
ENSG00000262400	6.64056967017163	2.39340580112119	0.672639369086911	3.55823032536763	0.000373361853947954	0.00852448272587854		processed_pseudogene	ENST00000573276	ENST00000573276	NA	NA	NA	calcium activated nucleotidase 1 (CANT1) pseudogene
ENSG00000154645	125.886763242616	2.39011916401199	0.637891108493981	3.74690779066494	0.000179027858107721	0.00533334763444403	CHODL	protein_coding	ENST00000400128	ENST00000299295	140578	GO:0005515	BP	chondrolectin [Source:HGNC Symbol;Acc:HGNC:17807]
ENSG00000183662	551.065949305008	2.38879961430638	0.825755221699353	2.89286649546143	0.00381743521910461	0.0368644679523153	TAFA1	protein_coding	ENST00000478136	ENST00000478136	407738	GO:0005515	MF	TAFA chemokine like family member 1 [Source:HGNC Symbol;Acc:HGNC:21587]
ENSG00000198597	2.71007901407672	2.38771264288041	0.923321704865269	2.58600293949423	0.00970961024885657	0.0663725558134447	ZNF536	protein_coding	ENST00000706142	ENST00000355537	9745	GO:0000122	BP	zinc finger protein 536 [Source:HGNC Symbol;Acc:HGNC:29025]
ENSG00000233332	4.96575024018846	2.38589356072295	0.883302910226144	2.70110460760524	0.00691095981995237	0.0540083140254755		lncRNA	ENST00000412483	ENST00000412483	124904553	NA	NA	novel transcript
ENSG00000070031	17.6499529285382	2.38575495230612	0.591639270045882	4.03244861031807	5.5198688073385e-05	0.00242954907700346	SCT	protein_coding	ENST00000176195	ENST00000176195	6343	GO:0001664	MF	secretin [Source:HGNC Symbol;Acc:HGNC:10607]
ENSG00000280094	14.525482838205	2.38458886130824	0.823734788446537	2.89485025369061	0.00379339447334939	0.0367260590133019	OR1B1	protein_coding	ENST00000707075	ENST00000623530	347169	GO:0004930	BP	olfactory receptor family 1 subfamily B member 1 [Source:HGNC Symbol;Acc:HGNC:8181]
ENSG00000263862	4.69597532395004	2.3843314884284	0.831018963550352	2.86916615986939	0.00411555532387826	0.0386184646023539	LINC01543	lncRNA	ENST00000578367	ENST00000660990	NA	NA	NA	long intergenic non-protein coding RNA 1543 [Source:HGNC Symbol;Acc:HGNC:51310]
ENSG00000258716	8.82881374421245	2.38131375684591	0.586596778276144	4.05954114484565	4.91692436415456e-05	0.00226053408171869		lncRNA	ENST00000553712	ENST00000553712	105370622	NA	NA	novel transcript, antisense to TTC7B
ENSG00000266573	3.28513298420308	2.38096762745232	0.860689048620631	2.76635055513735	0.00566875607194638	0.047360444930069		lncRNA	ENST00000577354	ENST00000654065	NA	NA	NA	novel transcript
ENSG00000235271	42.1308931872074	2.37877419854324	0.573110426366843	4.1506384967085	3.31549073954275e-05	0.00176189078476642		lncRNA	ENST00000447149	ENST00000438113	NA	NA	NA	novel transcript
ENSG00000248840	2.63805493133975	2.37862838643083	0.970686081443996	2.4504610006279	0.014267341730513	0.0848160502589004		transcribed_processed_pseudogene	ENST00000510094	ENST00000510094	NA	NA	NA	X antigen family, member 5 (XAGE5) pseudogene
ENSG00000249797	1451.56406145856	2.37852246199811	0.820789508433966	2.8978470576899	0.00375733767919183	0.0364888885716947	LINC02147	lncRNA	ENST00000509669	ENST00000509367	NA	NA	NA	long intergenic non-protein coding RNA 2147 [Source:HGNC Symbol;Acc:HGNC:53007]
ENSG00000172548	71.7833786251972	2.378057078828	0.591847888429874	4.01802072004818	5.86890376039308e-05	0.00253728611591813	NIPAL4	protein_coding	ENST00000435489	ENST00000311946	348938	GO:0005515	MF	NIPA like domain containing 4 [Source:HGNC Symbol;Acc:HGNC:28018]
ENSG00000286965	9.08471531457654	2.37804392215544	0.857900778100448	2.77193351825706	0.00557244161445934	0.0469274645024709		lncRNA	ENST00000664834	ENST00000664834	NA	NA	NA	novel transcript
ENSG00000279693	34.1409836630288	2.37804135452123	0.832134536658157	2.85776067421912	0.00426642041706073	0.0396082438543697		TEC	ENST00000624251	ENST00000624251	NA	NA	NA	novel transcript
ENSG00000286341	110.572943681416	2.37781021670226	0.566823549142897	4.19497429190757	2.72902538601016e-05	0.00151717017459789		lncRNA	ENST00000665104	ENST00000665104	NA	NA	NA	novel transcript, antisense to UBASH3B
ENSG00000239445	56.6811446436654	2.37747121212471	0.641073529452045	3.7085780380869	0.000208426426708203	0.00590398741241351	ST3GAL6-AS1	lncRNA	ENST00000670291	ENST00000670291	NA	NA	NA	ST3GAL6 antisense RNA 1 [Source:HGNC Symbol;Acc:HGNC:40828]
ENSG00000253687	12.1589701693527	2.37545827694208	0.866946569651914	2.74002846322564	0.00614338638709469	0.0500896684305175		lncRNA	ENST00000523598	ENST00000523598	NA	NA	NA	novel transcript
ENSG00000177275	18.7644996717512	2.37529125265315	0.49321831498575	4.81590237118784	1.46536159961769e-06	0.000199820025523716	OR2AJ1	protein_coding	ENST00000318244	ENST00000318244	127608	GO:0004930	BP	olfactory receptor family 2 subfamily AJ member 1 [Source:HGNC Symbol;Acc:HGNC:15001]
ENSG00000211725	9.7758234186854	2.37460965151857	0.849447405096044	2.79547578493113	0.00518233839577367	0.0447583604851046	TRBV5-5	TR_V_gene	ENST00000390372	ENST00000390372	NA	GO:0002250	BP	T cell receptor beta variable 5-5 [Source:HGNC Symbol;Acc:HGNC:12222]
ENSG00000228171	4.75150928564304	2.3741719670053	0.872902710345891	2.7198586267014	0.00653098320361398	0.0520864288337663		unprocessed_pseudogene	ENST00000451481	ENST00000451481	NA	NA	NA	pseudogene similar to part of chromosome 11 open reading frame 48 C11orf48
ENSG00000183346	27.3550229099822	2.37307651137569	0.480643502145905	4.93729032178889	7.92155019334581e-07	0.000133763148498479	CABCOCO1	protein_coding	ENST00000648843	ENST00000648843	219621	GO:0005509	MF	ciliary associated calcium binding coiled-coil 1 [Source:HGNC Symbol;Acc:HGNC:28678]
ENSG00000201367	23.4151450708237	2.37200409689495	0.555304108346107	4.27154069498894	1.94127092066849e-05	0.00119914129896199	RNU6-522P	snRNA	ENST00000364497	ENST00000364497	NA	NA	NA	RNA, U6 small nuclear 522, pseudogene [Source:HGNC Symbol;Acc:HGNC:47485]
ENSG00000266802	9.17869895338144	2.37075464590919	0.546989616356019	4.33418583281868	1.46300553592993e-05	0.000956006655449618		miRNA	ENST00000583845	ENST00000583845	NA	NA	NA
ENSG00000237939	3.51810529129587	2.36994536385431	0.997260695194553	2.37645519900086	0.0174798839417992	0.0962295151089676	IDI1P1	processed_pseudogene	ENST00000435551	ENST00000435551	NA	NA	NA	IDI1 pseudogene 1 [Source:HGNC Symbol;Acc:HGNC:54666]
ENSG00000254927	4.32933289884227	2.36821383542034	0.910848382942798	2.60000882668204	0.00932213626508775	0.0646025515726989		lncRNA	ENST00000530492	ENST00000530492	NA	NA	NA	novel transcript
ENSG00000123560	15.8050334131133	2.36669518603663	0.604698703245998	3.91384200649399	9.08390847118587e-05	0.00340514643687524	PLP1	protein_coding	ENST00000434483	ENST00000621218	5354	GO:0005198	BP	proteolipid protein 1 [Source:HGNC Symbol;Acc:HGNC:9086]
ENSG00000160360	1428.52381918018	2.36653361383318	0.596305670116844	3.96865857970035	7.2278351204122e-05	0.00290205611012461	GPSM1	protein_coding	ENST00000616132	ENST00000440944	26086	GO:0000132	BP	G protein signaling modulator 1 [Source:HGNC Symbol;Acc:HGNC:17858]
ENSG00000277255	5.59622340889081	2.3657967242174	0.794197621233292	2.97885143567115	0.00289331024239108	0.0311130385644527	MIR7854	miRNA	ENST00000620068	ENST00000620068	102465840	NA	NA	microRNA 7854 [Source:HGNC Symbol;Acc:HGNC:50047]
ENSG00000276597	6.34894975029841	2.36569404711561	0.704658803489972	3.35721917529308	0.000787306756059181	0.0135864932841235	TRBV11-3	TR_V_gene	ENST00000611787	ENST00000611787	NA	GO:0002250	BP	T cell receptor beta variable 11-3 [Source:HGNC Symbol;Acc:HGNC:12182]
ENSG00000273557	12.3588734930195	2.365328069412	0.782012791742891	3.02466672462011	0.00248907240087696	0.0284213734869046		lncRNA	ENST00000622826	ENST00000622826	NA	NA	NA	novel transcript, sense intronic to PCDHG cluster
ENSG00000248550	23.8271880630104	2.36515727019998	0.829734903115368	2.85049750386495	0.00436508929991041	0.0402482937751492	OTX2-AS1	lncRNA	ENST00000534909	ENST00000554725	NA	NA	NA	OTX2 antisense RNA 1 (head to head) [Source:HGNC Symbol;Acc:HGNC:43906]
ENSG00000140600	14.4032500645981	2.36336519503088	0.962838871185989	2.45458016471622	0.014104921154529	0.0841776103782098	SH3GL3	protein_coding	ENST00000492099	ENST00000427482	6457	GO:0001669	CC	SH3 domain containing GRB2 like 3, endophilin A3 [Source:HGNC Symbol;Acc:HGNC:10832]
ENSG00000235141	11.7930029624966	2.36303614630502	0.55876562342834	4.22902921587494	2.34701868845088e-05	0.0013679333439655	COX6CP17	processed_pseudogene	ENST00000421389	ENST00000421389	NA	NA	NA	cytochrome c oxidase subunit 6C pseudogene 17 [Source:HGNC Symbol;Acc:HGNC:49369]
ENSG00000249937	64.5282709977853	2.36250352931387	0.703359043185588	3.35888697558197	0.000782570672908767	0.0135309223717071	LINC02223	lncRNA	ENST00000511596	ENST00000511596	NA	NA	NA	long intergenic non-protein coding RNA 2223 [Source:HGNC Symbol;Acc:HGNC:53092]
ENSG00000149256	701.122595505785	2.36243281466225	0.945170378508009	2.49947826167748	0.012437632956587	0.0777723316350971	TENM4	protein_coding	ENST00000278550	ENST00000278550	26011	GO:0001702	BP	teneurin transmembrane protein 4 [Source:HGNC Symbol;Acc:HGNC:29945]
ENSG00000171004	15.778749958456	2.36112041525934	0.995198932300359	2.37251100119422	0.0176676369899647	0.0969386168037299	HS6ST2	protein_coding	ENST00000370833	ENST00000370833	90161	GO:0000139	CC	heparan sulfate 6-O-sulfotransferase 2 [Source:HGNC Symbol;Acc:HGNC:19133]
ENSG00000230470	24.8328015861483	2.35927724699862	0.756832093056882	3.11730602949114	0.00182512005846506	0.0234957386650136		lncRNA	ENST00000414377	ENST00000414377	NA	NA	NA	novel transcript
ENSG00000124882	6280.58549027685	2.35838479671681	0.987842580666444	2.38740953556157	0.0169675780952445	0.0946788761658053	EREG	protein_coding	ENST00000244869	ENST00000244869	2069	GO:0001525	BP	epiregulin [Source:HGNC Symbol;Acc:HGNC:3443]
ENSG00000223951	26.584585058797	2.35805926592354	0.580647575054691	4.06108518700252	4.88451433544857e-05	0.00225136237277767	H2ACP2	processed_pseudogene	ENST00000456007	ENST00000456007	NA	NA	NA	H2AC histone family pseudogene 2 [Source:HGNC Symbol;Acc:HGNC:54439]
ENSG00000002587	124.156881465286	2.35730709419864	0.839394389377571	2.8083426861438	0.00497972054071443	0.0435285876776141	HS3ST1	protein_coding	ENST00000002596	ENST00000002596	9957	GO:0005796	MF	heparan sulfate-glucosamine 3-sulfotransferase 1 [Source:HGNC Symbol;Acc:HGNC:5194]
ENSG00000250334	80.6779146220843	2.3562040891881	0.879509014051348	2.67899936390026	0.00738425341391803	0.0563138052973239	LINC00989	lncRNA	ENST00000508174	ENST00000668018	100506035	NA	NA	long intergenic non-protein coding RNA 989 [Source:HGNC Symbol;Acc:HGNC:48918]
ENSG00000251075	100.490264218481	2.35540505123902	0.715196883458643	3.2933659328162	0.000989955404865992	0.0158147782980714	HTT-AS	lncRNA	ENST00000664062	ENST00000664062	NA	NA	NA	HTT antisense RNA [Source:HGNC Symbol;Acc:HGNC:37118]
ENSG00000267028	395.083473098452	2.35420255756702	0.451082905963888	5.21900193166595	1.79889887437861e-07	5.03914804066243e-05	TCF4-AS1	lncRNA	ENST00000587660	ENST00000587660	105372127	NA	NA	TCF4 antisense RNA 1 [Source:HGNC Symbol;Acc:HGNC:51642]
ENSG00000259073	66.8202994353359	2.35398855059614	0.463170076010501	5.08234161168645	3.7281014778465e-07	8.58080732506121e-05	FOXN3-AS2	lncRNA	ENST00000554071	ENST00000554071	29018	NA	NA	FOXN3 antisense RNA 2 [Source:HGNC Symbol;Acc:HGNC:30119]
ENSG00000258111	54.0002688229683	2.35161449193524	0.539752253370072	4.3568405268387	1.31953335122018e-05	0.000888751436194198		processed_pseudogene	ENST00000548397	ENST00000548397	NA	NA	NA	ATP synthase, H+ transporting, mitochondrial Fo complex, subunit C1 (subunit 9) (ATP5G1) pseudogene
ENSG00000261734	6.17663937892752	2.34949403241417	0.841981365049622	2.79043471737133	0.00526373141306986	0.045266586944953		lncRNA	ENST00000566804	ENST00000566804	NA	NA	NA	novel transcript
ENSG00000267766	8.14238272774653	2.34827331496659	0.785282546319645	2.99035465129355	0.00278653709375603	0.0304764843886101		lncRNA	ENST00000587475	ENST00000587475	NA	NA	NA	novel transcript, sense intronic to BCL2
ENSG00000260152	4.00103011036721	2.34749743663587	0.936427312125198	2.50686562239229	0.0121807009348848	0.0768707315723014		processed_pseudogene	ENST00000565381	ENST00000565381	NA	NA	NA	stromal cell-derived factor 2 (SDF2) pseudogene
ENSG00000254418	182.620519322452	2.34621842677363	0.82568532145183	2.84154067635379	0.00448961242220895	0.0408965552026576	SPON1-AS1	lncRNA	ENST00000534587	ENST00000534587	NA	NA	NA	SPON1 antisense RNA 1 [Source:HGNC Symbol;Acc:HGNC:53117]
ENSG00000185924	54.1196271572685	2.34374814051596	0.679723418315722	3.44809091074647	0.000564563978541289	0.0110686721787009	RTN4RL1	protein_coding	ENST00000331238	ENST00000331238	146760	GO:0005515	MF	reticulon 4 receptor like 1 [Source:HGNC Symbol;Acc:HGNC:21329]
ENSG00000289995	46.1652970608456	2.34248965538602	0.645198358550111	3.63065036409897	0.000282707945468274	0.00727867605088637		lncRNA	ENST00000702390	ENST00000702390	107985241	NA	NA	novel transcript
ENSG00000279390	234.154267986508	2.34230806399779	0.62542337591032	3.74515592831576	0.000180281769360451	0.00535381738935622		TEC	ENST00000623352	ENST00000623352	NA	NA	NA	TEC
ENSG00000259416	3.2120574516995	2.34204683698675	0.978649981872246	2.39314042851787	0.0167048460984688	0.0936466519724276	LINC02883	lncRNA	ENST00000557908	ENST00000557908	NA	NA	NA	long intergenic non-protein coding RNA 2883 [Source:HGNC Symbol;Acc:HGNC:54806]
ENSG00000290933	45.4153832605373	2.34146845448256	0.623684973513482	3.75424862537906	0.000173862226528947	0.00522685974862731		lncRNA	ENST00000434659	ENST00000610811	NA	GO:0005576	CC	novel transcript
ENSG00000146090	32.418316272216	2.34031420941773	0.868720823931255	2.69397733419929	0.00706049659005025	0.0547965938022764	RASGEF1C	protein_coding	ENST00000361132	ENST00000361132	255426	GO:0005085	MF	RasGEF domain family member 1C [Source:HGNC Symbol;Acc:HGNC:27400]
ENSG00000182463	694.765170427427	2.33809729028722	0.943506519596916	2.47809341188877	0.0132086559065936	0.0807075396831613	TSHZ2	protein_coding	ENST00000371497	ENST00000371497	128553	GO:0000785	CC	teashirt zinc finger homeobox 2 [Source:HGNC Symbol;Acc:HGNC:13010]
ENSG00000257539	12.7716296180485	2.33768474170875	0.992712463740264	2.35484576561173	0.0185303951616473	0.0997488990855486	HSPA8P14	processed_pseudogene	ENST00000552265	ENST00000552265	NA	NA	NA	heat shock protein family A (Hsp70) member 8 pseudogene 14 [Source:HGNC Symbol;Acc:HGNC:44929]
ENSG00000205549	36.5768608989731	2.3376545593392	0.616721851642032	3.79045197298452	0.000150373407528801	0.00470059987410101	LINC03041	lncRNA	ENST00000380685	ENST00000648575	100129385	NA	NA	long intergenic non-protein coding RNA 3041 [Source:HGNC Symbol;Acc:HGNC:19054]
ENSG00000254205	41.6406808687764	2.33741136698256	0.659978633082329	3.54164703191381	0.000397637177022299	0.00886815346663187		lncRNA	ENST00000522494	ENST00000522494	NA	NA	NA	novel transcript
ENSG00000227683	12.4844776564184	2.33596317250363	0.982183299949389	2.37833729470253	0.0173909099547562	0.0959740259812266		lncRNA	ENST00000422807	ENST00000422807	NA	NA	NA	novel transcript
ENSG00000157782	8.41181436026346	2.33519434567982	0.898478004652902	2.59905566256121	0.00934806137577572	0.0647253393130928	CABP1	protein_coding	ENST00000316803	ENST00000316803	9478	GO:0000139	CC	calcium binding protein 1 [Source:HGNC Symbol;Acc:HGNC:1384]
ENSG00000223817	13.8621940022135	2.3349682916913	0.883835692707355	2.64185788258771	0.00824526454698847	0.0601920969030253	CDH23-AS1	lncRNA	ENST00000428918	ENST00000428918	NA	NA	NA	CDH23 antisense RNA 1 [Source:HGNC Symbol;Acc:HGNC:31433]
ENSG00000024422	282.053754506691	2.33462554101404	0.810249049225425	2.88136782541847	0.00395953265192428	0.0376530715552462	EHD2	protein_coding	ENST00000538399	ENST00000263277	30846	GO:0003676	MF	EH domain containing 2 [Source:HGNC Symbol;Acc:HGNC:3243]
ENSG00000264635	17.217730161131	2.33429172488087	0.531407075379387	4.3926621097665	1.11971080767344e-05	0.000802814875914436		lncRNA	ENST00000581712	ENST00000581712	NA	NA	NA	novel transcript, sense intronic toYES1
ENSG00000259867	148.599843878696	2.33415284758509	0.781203877686904	2.98789203977887	0.00280908763622947	0.0306436570485795	DYNLRB2-AS1	lncRNA	ENST00000568776	ENST00000668341	NA	NA	NA	DYNLRB2 antisense RNA 1 [Source:HGNC Symbol;Acc:HGNC:55405]
ENSG00000239642	64.5008305352703	2.33405522219635	0.717100160896481	3.25485245921356	0.00113451287649264	0.0172982098333071	MEIKIN	protein_coding	ENST00000439905	ENST00000442687	728637	GO:0000776	BP	meiotic kinetochore factor [Source:HGNC Symbol;Acc:HGNC:51253]
ENSG00000105996	52.3398442065071	2.33382456941455	0.695244467770978	3.35684018730422	0.000788386678345212	0.0135986353263401	HOXA2	protein_coding	ENST00000222718	ENST00000222718	3199	GO:0000122	BP	homeobox A2 [Source:HGNC Symbol;Acc:HGNC:5103]
ENSG00000168785	1912.61694427142	2.33364722335674	0.624795542081733	3.73505741667322	0.000187672364060294	0.00550912148471388	TSPAN5	protein_coding	ENST00000508798	ENST00000305798	10098	GO:0005515	MF	tetraspanin 5 [Source:HGNC Symbol;Acc:HGNC:17753]
ENSG00000290920	9.48503479817425	2.33313727183768	0.922248856461641	2.52983482222916	0.0114116235358281	0.0737516309657537		lncRNA	ENST00000692963	ENST00000433168	NA	NA	NA	novel transcript
ENSG00000271959	17.8395089859503	2.33036615832334	0.936907603939643	2.48729559726517	0.0128718397874295	0.0795105645399233		lncRNA	ENST00000606664	ENST00000606664	NA	NA	NA	novel transcript, antisense to MROH5
ENSG00000285994	86.3053729125872	2.33026649006292	0.413257703639036	5.63877326313149	1.71265868064399e-08	9.67009907558612e-06		lncRNA	ENST00000648650	ENST00000648650	NA	NA	NA	novel transcript, sense intronic to CAMK1D
ENSG00000147896	76.7997690346267	2.32976768095426	0.593717524708267	3.92403387806184	8.70784818953547e-05	0.00329839415279931	IFNK	protein_coding	ENST00000276943	ENST00000276943	56832	GO:0002250	BP	interferon kappa [Source:HGNC Symbol;Acc:HGNC:21714]
ENSG00000255910	25.5511894922507	2.32804354816308	0.487623554318952	4.77426393278844	1.80365712351697e-06	0.000231123949700032		lncRNA	ENST00000535764	ENST00000535764	NA	NA	NA	novel transcript
ENSG00000030304	48.294607787245	2.32785078523791	0.756858890127455	3.07567343873824	0.00210027737345093	0.0255454807024647	MUSK	protein_coding	ENST00000374448	ENST00000374448	4593	GO:0001934	MF	muscle associated receptor tyrosine kinase [Source:HGNC Symbol;Acc:HGNC:7525]
ENSG00000243193	378.89079241705	2.32779401681983	0.618527550466287	3.76344435274545	0.000167589032249496	0.00511054621887577	PRKAR2B-AS1	lncRNA	ENST00000626365	ENST00000627539	NA	NA	NA	PRKAR2B antisense RNA 1 [Source:HGNC Symbol;Acc:HGNC:40472]
ENSG00000258545	257.511544794171	2.32757123252636	0.475679746705187	4.89314764533989	9.92359018635847e-07	0.000154072080230437	RHOXF1-AS1	lncRNA	ENST00000553843	ENST00000553843	101928969	NA	NA	RHOXF1 antisense RNA 1 [Source:HGNC Symbol;Acc:HGNC:51582]
ENSG00000284341	266.71313913189	2.32755265159744	0.825267373712989	2.82036189208047	0.00479695172654706	0.042494805295526		protein_coding	ENST00000471521	ENST00000471521	NA	NA	NA	novel transcript
ENSG00000243267	4.05007400854925	2.32698208526411	0.864804356323779	2.69076128982045	0.00712891846028534	0.0551146543458628	RN7SL614P	misc_RNA	ENST00000461850	ENST00000461850	NA	NA	NA	RNA, 7SL, cytoplasmic 614, pseudogene [Source:HGNC Symbol;Acc:HGNC:46630]
ENSG00000095637	319.317062360467	2.32287185373735	0.565182711010525	4.10994853254472	3.95747312733656e-05	0.00197251377833702	SORBS1	protein_coding	ENST00000371227	ENST00000371247	10580	GO:0001725	BP	sorbin and SH3 domain containing 1 [Source:HGNC Symbol;Acc:HGNC:14565]
ENSG00000198723	20.4834169342434	2.3228582241722	0.477871345947917	4.86084433366584	1.16886141431716e-06	0.000171201766325141	TEX45	protein_coding	ENST00000596132	ENST00000361664	374877	GO:0005515	MF	testis expressed 45 [Source:HGNC Symbol;Acc:HGNC:24745]
ENSG00000286863	437.840462688514	2.32176802881474	0.748651311911473	3.1012675619131	0.00192694088793913	0.0243043406375457		lncRNA	ENST00000653965	ENST00000665984	NA	NA	NA	novel transcript
ENSG00000233597	7.29088995087114	2.32127248477568	0.750809254239117	3.09169402437387	0.00199017872804885	0.0247989994885425		processed_pseudogene	ENST00000498753	ENST00000498753	NA	NA	NA	ribosomal protein L19 (RPL19) pseudogene
ENSG00000286730	251.950970342275	2.32001957575711	0.462584641803222	5.01534068816755	5.29395746903243e-07	0.000102704716306779		lncRNA	ENST00000652780	ENST00000652780	NA	NA	NA	novel transcript
ENSG00000249738	142.115312608217	2.31896663848197	0.575676120429043	4.02824879509277	5.61938600928217e-05	0.00245681813633348		lncRNA	ENST00000641961	ENST00000636819	285626	NA	NA	novel transcript
ENSG00000162571	68.0199787759016	2.31844739739122	0.970487673804949	2.38895089548266	0.0168965605392909	0.0944430180429724	TTLL10	protein_coding	ENST00000379289	ENST00000379289	254173	GO:0005515	MF	tubulin tyrosine ligase like 10 [Source:HGNC Symbol;Acc:HGNC:26693]
ENSG00000232117	3.02999610473192	2.31759969325997	0.948677148757229	2.44298041361705	0.0145665278071726	0.0858828599836822	LINC00384	lncRNA	ENST00000437721	ENST00000437721	NA	NA	NA	long intergenic non-protein coding RNA 384 [Source:HGNC Symbol;Acc:HGNC:42711]
ENSG00000267690	91.2048037035337	2.31663830874495	0.717618833317149	3.22822952964658	0.00124558986289225	0.0184602534666683	LDLRAD4-AS1	lncRNA	ENST00000588672	ENST00000588672	100288122	NA	NA	LDLRAD4 antisense RNA 1 [Source:HGNC Symbol;Acc:HGNC:48592]
ENSG00000233101	3075.76906608171	2.31531885066271	0.931110396371019	2.4866211994696	0.012896263337801	0.0796035366174966	HOXB-AS3	lncRNA	ENST00000465846	ENST00000465846	404266	GO:0005515	MF	HOXB cluster antisense RNA 3 [Source:HGNC Symbol;Acc:HGNC:40283]
ENSG00000183049	8708.52882016854	2.31452115350504	0.385753116195607	6.00000636762555	1.97309791365974e-09	2.2999956841293e-06	CAMK1D	protein_coding	ENST00000619168	ENST00000619168	57118	GO:0004683	MF	calcium/calmodulin dependent protein kinase ID [Source:HGNC Symbol;Acc:HGNC:19341]
ENSG00000227610	18.6815327928028	2.31370633818754	0.789937083922723	2.92897546561301	0.00340081264389065	0.0342316896099255	FRMPD3-AS1	lncRNA	ENST00000415252	ENST00000415252	100874122	NA	NA	FRMPD3 antisense RNA 1 [Source:HGNC Symbol;Acc:HGNC:41239]
ENSG00000265932	6.9831568459676	2.31362373836247	0.872847799385592	2.65066113472596	0.00803343968088478	0.0593167912358914	MIR3146	miRNA	ENST00000580367	ENST00000580367	100422967	NA	NA	microRNA 3146 [Source:HGNC Symbol;Acc:HGNC:38368]
ENSG00000186827	40.4096332569159	2.3133924756174	0.829314542422185	2.78952358517753	0.00527856516388471	0.0453186578194673	TNFRSF4	protein_coding	ENST00000699969	ENST00000379236	7293	GO:0001618	MF	TNF receptor superfamily member 4 [Source:HGNC Symbol;Acc:HGNC:11918]
ENSG00000288581	9.57821770343748	2.31322890757796	0.679738556790003	3.40311563095957	0.000666220788643835	0.0122813757455256		lncRNA	ENST00000670400	ENST00000670400	NA	NA	NA	novel transcript, antisense to CLYBL
ENSG00000227523	13.6697785499917	2.31319767658239	0.658028048372934	3.51534814101328	0.00043917785026768	0.00946488689873746	RPS20P15	processed_pseudogene	ENST00000412792	ENST00000412792	NA	NA	NA	ribosomal protein S20 pseudogene 15 [Source:HGNC Symbol;Acc:HGNC:36340]
ENSG00000284237	91.4437757206778	2.31225542962261	0.728692040453716	3.17315862018048	0.00150790117054494	0.0208932195931027	LINC02767	lncRNA	ENST00000638446	ENST00000638446	NA	NA	NA	long intergenic non-protein coding RNA 2767 [Source:HGNC Symbol;Acc:HGNC:54287]
ENSG00000227330	43.9076740570318	2.30730072755407	0.677719811545359	3.40450535493848	0.000662840006813964	0.0122393390323094		lncRNA	ENST00000432412	ENST00000432412	NA	NA	NA	novel transcript
ENSG00000288915	14.0251918840361	2.30644531373529	0.553552041899906	4.16662777689175	3.09138647680419e-05	0.00166731853322084		lncRNA	ENST00000686939	ENST00000686939	NA	NA	NA	novel transcript, antisense to PRKCQ
ENSG00000235494	7.51422137631594	2.30576681711123	0.815737934483348	2.82660241683085	0.00470446975023611	0.041985853024088		lncRNA	ENST00000658061	ENST00000658061	NA	NA	NA	novel transcript
ENSG00000253619	398.084121956747	2.30504718258343	0.639321828164917	3.60545672153842	0.000311604420243141	0.00766517176984762		lncRNA	ENST00000517739	ENST00000517739	NA	NA	NA	novel transcript
ENSG00000102359	83.6182403896524	2.30246269372066	0.746458002997502	3.08451739344319	0.00203882688158471	0.0251022310708502	SRPX2	protein_coding	ENST00000640889	ENST00000373004	27286	GO:0001525	BP	sushi repeat containing protein X-linked 2 [Source:HGNC Symbol;Acc:HGNC:30668]
ENSG00000256824	351.693576575963	2.30001208623655	0.382025046159941	6.02057930325754	1.73793930157971e-09	2.16559222765119e-06		lncRNA	ENST00000537170	ENST00000537170	NA	NA	NA	novel transcript, antisense to MACROD1
ENSG00000227658	6.83138050815879	2.29997995038956	0.79773438705406	2.88314003722857	0.00393732361228409	0.037551675941513		lncRNA	ENST00000432405	ENST00000432405	NA	NA	NA	novel transcript
ENSG00000291111	19.1673460549385	2.2994425920902	0.938006114185153	2.45141535573862	0.0142295649101589	0.0847395447583225		lncRNA	ENST00000435074	ENST00000435074	NA	NA	NA	novel transcript
ENSG00000224095	12.2204756468675	2.29871542701704	0.686388695692135	3.34899954128627	0.000811039299830349	0.0138864792202393	LINC01935	lncRNA	ENST00000431897	ENST00000431897	105373519	NA	NA	long intergenic non-protein coding RNA 1935 [Source:HGNC Symbol;Acc:HGNC:52758]
ENSG00000223650	31.9094515389314	2.29857725685345	0.608571085235943	3.7770070130136	0.00015872426394046	0.00491066780971957	UHRF2P1	processed_pseudogene	ENST00000431339	ENST00000431339	NA	NA	NA	ubiquitin like with PHD and ring finger domains 2 pseudogene 1 [Source:HGNC Symbol;Acc:HGNC:39565]
ENSG00000128512	4263.0154422278	2.29779875652357	0.875481513940192	2.6246113937713	0.00867479116398074	0.0620123152327612	DOCK4	protein_coding	ENST00000423057	ENST00000428084	9732	GO:0005085	BP	dedicator of cytokinesis 4 [Source:HGNC Symbol;Acc:HGNC:19192]
ENSG00000172497	10.083384939786	2.29699713952148	0.531200582419117	4.32416156070618	1.53113060787275e-05	0.000992217570593469	ACOT12	protein_coding	ENST00000307624	ENST00000307624	134526	GO:0003986	MF	acyl-CoA thioesterase 12 [Source:HGNC Symbol;Acc:HGNC:24436]
ENSG00000177212	4.43092854158097	2.29542292347524	0.830833049794393	2.76279683871903	0.00573084250484674	0.0477275235665227	OR2T33	protein_coding	ENST00000641220	ENST00000641220	391195	GO:0004930	BP	olfactory receptor family 2 subfamily T member 33 [Source:HGNC Symbol;Acc:HGNC:31255]
ENSG00000270640	363.442909985098	2.29538306524768	0.548776026778504	4.18273203135773	2.88026810819681e-05	0.00157222610812387		lncRNA	ENST00000604052	ENST00000604052	NA	NA	NA	novel transcript, sense intronic to FOSL2
ENSG00000227009	3.86373481193799	2.29487651072615	0.801012042253724	2.86497129839558	0.00417047040370939	0.039040684785108	FUNDC2P4	processed_pseudogene	ENST00000441207	ENST00000441207	NA	NA	NA	FUN14 domain containing 2 pseudogene 4 [Source:HGNC Symbol;Acc:HGNC:37971]
ENSG00000171459	11.6619553566783	2.29418046347541	0.644252273117257	3.56099708018859	0.000369449192260274	0.00849602901912772	OR1L6	protein_coding	ENST00000304720	ENST00000304720	392390	GO:0004930	BP	olfactory receptor family 1 subfamily L member 6 [Source:HGNC Symbol;Acc:HGNC:8218]
ENSG00000286281	48.6310998775424	2.2939421901306	0.798506509288732	2.87279084571762	0.00406863378921406	0.0382772896536121		lncRNA	ENST00000658931	ENST00000658931	NA	NA	NA	novel transcript
ENSG00000229267	485.586887132627	2.29341443860695	0.827919157842962	2.7700946606697	0.00560400033099281	0.0470345818420382	SNHG31	lncRNA	ENST00000607412	ENST00000670391	NA	NA	NA	small nucleolar RNA host gene 31 [Source:HGNC Symbol;Acc:HGNC:54196]
ENSG00000286524	7.39003731625226	2.29192683623558	0.694369333340459	3.30073165128077	0.000964330685981622	0.0155460000612146		lncRNA	ENST00000657432	ENST00000657432	NA	NA	NA	novel transcript, antisense to EHBP1
ENSG00000165182	47.6264673917266	2.29188975361434	0.732238280218938	3.12997806250866	0.00174819357983624	0.0228969638278225	CXorf58	protein_coding	ENST00000379211	ENST00000379211	254158	NA	NA	chromosome X open reading frame 58 [Source:HGNC Symbol;Acc:HGNC:26356]
ENSG00000225676	4.484095380165	2.29104439798834	0.835716584407391	2.74141310670881	0.00611755392479827	0.0499128310287899		lncRNA	ENST00000432360	ENST00000432360	105372988	NA	NA	novel transcript
ENSG00000145284	436.324256177046	2.2891081000277	0.50596539096155	4.52423849717747	6.06133441447247e-06	0.000544856667665117	SCD5	protein_coding	ENST00000319540	ENST00000319540	79966	GO:0004768	MF	stearoyl-CoA desaturase 5 [Source:HGNC Symbol;Acc:HGNC:21088]
ENSG00000280375	12.1450116764218	2.2886185077592	0.918506547469586	2.49167359129247	0.0127142820560658	0.0789230326726253		TEC	ENST00000624340	ENST00000624340	NA	NA	NA	TEC
ENSG00000287117	947.41363665797	2.28729785807196	0.886485340091573	2.58018689608075	0.00987468566692692	0.0670862269712486		lncRNA	ENST00000653847	ENST00000653847	NA	NA	NA	novel transcript
ENSG00000258993	5.12020049227738	2.28696286879351	0.962701999661947	2.37556675855725	0.0175220224636049	0.0963591239909948		processed_pseudogene	ENST00000553515	ENST00000553515	NA	NA	NA	centromere protein W (CENPW) pseudogene
ENSG00000267750	55.6261113247803	2.28498289122882	0.775044026656077	2.9481975379997	0.00319632748973207	0.0329912853953036	RUNDC3A-AS1	lncRNA	ENST00000588097	ENST00000588097	NA	NA	NA	RUNDC3A antisense RNA 1 [Source:HGNC Symbol;Acc:HGNC:51344]
ENSG00000120093	3137.67378993252	2.284719359459	0.925812687344491	2.46779871424344	0.0135946740495566	0.0822876283843849	HOXB3	protein_coding	ENST00000470495	ENST00000498678	3213	GO:0000122	BP	homeobox B3 [Source:HGNC Symbol;Acc:HGNC:5114]
ENSG00000146809	3.79800943466927	2.28417184237313	0.87678837899257	2.6051575238687	0.00918320290137412	0.0641049282845783	ASB15	protein_coding	ENST00000451558	ENST00000451215	142685	GO:0005515	MF	ankyrin repeat and SOCS box containing 15 [Source:HGNC Symbol;Acc:HGNC:19767]
ENSG00000243227	4.72642941377256	2.28333410431582	0.964332278882543	2.36778769550442	0.0178948012036915	0.0976659924930671	RN7SL55P	misc_RNA	ENST00000464534	ENST00000464534	NA	NA	NA	RNA, 7SL, cytoplasmic 55, pseudogene [Source:HGNC Symbol;Acc:HGNC:46071]
ENSG00000120162	2537.27004277358	2.27922079809592	0.581031357555094	3.92271564771752	8.75564651363919e-05	0.00330956111314713	MOB3B	protein_coding	ENST00000262244	ENST00000262244	79817	GO:0001934	BP	MOB kinase activator 3B [Source:HGNC Symbol;Acc:HGNC:23825]
ENSG00000269416	3.89790432147304	2.27892598255249	0.848399862437952	2.68614610097153	0.00722814748954253	0.0556577681775076	LINC01224	lncRNA	ENST00000600643	ENST00000688559	104472717	NA	NA	long intergenic non-protein coding RNA 1224 [Source:HGNC Symbol;Acc:HGNC:49676]
ENSG00000198502	3842.44646201894	2.27743948387756	0.716105336882508	3.18031351894704	0.00147115791980832	0.0206047603881126	HLA-DRB5	protein_coding	ENST00000374975	ENST00000374975	3127	GO:0000139	CC	major histocompatibility complex, class II, DR beta 5 [Source:HGNC Symbol;Acc:HGNC:4953]
ENSG00000284122	26.1967637866129	2.27541217548587	0.699856574217184	3.25125498468169	0.00114896760964852	0.0174230354772383	MIR6717	miRNA	ENST00000622747	ENST00000622747	102465428	NA	NA	microRNA 6717 [Source:HGNC Symbol;Acc:HGNC:50000]
ENSG00000235482	5.11041870920811	2.27481280903839	0.839333064496558	2.7102623562231	0.00672300063739589	0.0529747821702874	RPL21P135	processed_pseudogene	ENST00000442539	ENST00000442539	NA	NA	NA	ribosomal protein L21 pseudogene 135 [Source:HGNC Symbol;Acc:HGNC:44539]
ENSG00000158481	235.531070910399	2.27437469948428	0.883183992483505	2.57519918707852	0.0100182374396106	0.0677430816088641	CD1C	protein_coding	ENST00000368170	ENST00000368170	911	GO:0001916	CC	CD1c molecule [Source:HGNC Symbol;Acc:HGNC:1636]
ENSG00000285797	57.7216712839835	2.27422626092437	0.750105695792663	3.03187440607435	0.002430403039991	0.0280860426585046		lncRNA	ENST00000648863	ENST00000648863	NA	NA	NA	novel transcript
ENSG00000280109	75.9240402685627	2.27346504077538	0.804612413018283	2.82554060065653	0.00472009057558514	0.0420836893756094	PLAC4	lncRNA	ENST00000623119	ENST00000430327	191585	NA	NA	placenta enriched 4 [Source:HGNC Symbol;Acc:HGNC:14616]
ENSG00000117122	10.4112795306602	2.273439777832	0.634500171611708	3.5830404459264	0.000339617997432652	0.00805007583846702	MFAP2	protein_coding	ENST00000375534	ENST00000375535	4237	GO:0001527	BP	microfibril associated protein 2 [Source:HGNC Symbol;Acc:HGNC:7033]
ENSG00000254915	6.98041288790083	2.2723252419523	0.787302950950326	2.88621456227169	0.00389906243707601	0.0373397774164886		processed_pseudogene	ENST00000530091	ENST00000530091	NA	NA	NA	SMT3 suppressor of mif two 3 homolog 1 (S. cerevisiae) (SUMO1) pseudogene
ENSG00000236817	641.282876761802	2.27222622012569	0.817890260400413	2.77815537137376	0.00546684707181795	0.0463429289623414		lncRNA	ENST00000435333	ENST00000435333	102724446	NA	NA	novel transcript
ENSG00000123358	2541.89545244302	2.27204433117496	0.558723135946811	4.06649409161258	4.77256946684691e-05	0.00221958262875135	NR4A1	protein_coding	ENST00000548977	ENST00000394825	3164	GO:0000785	CC	nuclear receptor subfamily 4 group A member 1 [Source:HGNC Symbol;Acc:HGNC:7980]
ENSG00000261537	63.1501427044845	2.27200154857076	0.417226531801708	5.44548674495744	5.16639107629559e-08	2.05156821904415e-05		lncRNA	ENST00000561938	ENST00000561938	NA	NA	NA	novel transcript, sense intronic to WWOX
ENSG00000007384	153.926947261143	2.27070579188305	0.627117735429583	3.62086042795072	0.000293624891556799	0.00738700253537439	RHBDF1	protein_coding	ENST00000262316	ENST00000262316	64285	GO:0000139	CC	rhomboid 5 homolog 1 [Source:HGNC Symbol;Acc:HGNC:20561]
ENSG00000206077	159.144966006073	2.27044017449576	0.845625858675648	2.6849228310633	0.00725465542542682	0.0557893654933441	ZDHHC11B	protein_coding	ENST00000522356	ENST00000508859	653082	GO:0005783	MF	zinc finger DHHC-type containing 11B [Source:HGNC Symbol;Acc:HGNC:32962]
ENSG00000112149	4150.69353056922	2.27018558482936	0.682690904417959	3.32534910035875	0.00088307887978118	0.0146784445261144	CD83	protein_coding	ENST00000379153	ENST00000379153	9308	GO:0005515	BP	CD83 molecule [Source:HGNC Symbol;Acc:HGNC:1703]
ENSG00000266171	36.4942487887041	2.27009514091194	0.453641812936277	5.00415763312986	5.61068320933852e-07	0.000106150601284113		lncRNA	ENST00000583314	ENST00000583314	NA	NA	NA	novel transcript, antisense to YES1
ENSG00000290930	8.44419198513176	2.26953649047403	0.952380386312601	2.38301473139442	0.0171715071599315	0.0953367659125299	OR7E91P	lncRNA	ENST00000642062	ENST00000642062	79315	NA	NA	olfactory receptor family 7 subfamily E member 91 pseudogene [Source:NCBI gene (formerly Entrezgene);Acc:79315]
ENSG00000128536	205.016331665709	2.26911801062244	0.878209198774735	2.58380123299582	0.00977180921741625	0.0666489065319522	CDHR3	protein_coding	ENST00000487084	ENST00000317716	222256	GO:0000902	BP	cadherin related family member 3 [Source:HGNC Symbol;Acc:HGNC:26308]
ENSG00000241587	7.17513690253083	2.26590103436464	0.875696145109659	2.5875425477417	0.00966632569384438	0.0661863325230156	RN7SL482P	misc_RNA	ENST00000487928	ENST00000487928	NA	NA	NA	RNA, 7SL, cytoplasmic 482, pseudogene [Source:HGNC Symbol;Acc:HGNC:46498]
ENSG00000157110	1485.55946660871	2.26238438906268	0.586193810683879	3.85944775913496	0.000113643547006841	0.00389992707942946	RBPMS	protein_coding	ENST00000339877	ENST00000397323	11030	GO:0000381	BP	RNA binding protein, mRNA processing factor [Source:HGNC Symbol;Acc:HGNC:19097]
ENSG00000255545	54.4374720791374	2.26219562213279	0.849921409750799	2.66165270833226	0.0077758060462595	0.0582095445874515	B3GAT1-DT	lncRNA	ENST00000531319	ENST00000661684	NA	NA	NA	B3GAT1 divergent transcript [Source:HGNC Symbol;Acc:HGNC:27449]
ENSG00000284158	5.42119133064247	2.26124438255523	0.945773178569546	2.39089501985592	0.0168073579132952	0.0940899590325075	MIR6822	miRNA	ENST00000621888	ENST00000621888	102466743	NA	NA	microRNA 6822 [Source:HGNC Symbol;Acc:HGNC:49999]
ENSG00000231829	9.79942269077632	2.2610688505979	0.926547350475198	2.44031656821237	0.0146743962579637	0.086366292295848		lncRNA	ENST00000655264	ENST00000655264	NA	NA	NA	novel transcript
ENSG00000242441	37.1539288707127	2.26048124190705	0.956815052797797	2.36250593601891	0.0181518507399018	0.0985035708570495	GTF2A1L	protein_coding	ENST00000448460	ENST00000403751	11036	GO:0001673	CC	general transcription factor IIA subunit 1 like [Source:HGNC Symbol;Acc:HGNC:30727]
ENSG00000169224	669.572397928149	2.2600098333164	0.789615686537824	2.86216430581023	0.00420758720259853	0.0392780602307157	GCSAML	protein_coding	ENST00000527084	ENST00000366488	148823	GO:0005515	BP	germinal center associated signaling and motility like [Source:HGNC Symbol;Acc:HGNC:29583]
ENSG00000248984	18.6259791044251	2.25804991738359	0.896719583944812	2.51812267492817	0.0117982220771985	0.0751658238684139		lncRNA	ENST00000515111	ENST00000515111	NA	NA	NA	novel transcript
ENSG00000255516	4.16783081079225	2.25743544028376	0.919238164416565	2.4557677516757	0.0140583980936483	0.0840526594162931		lncRNA	ENST00000532849	ENST00000532849	NA	NA	NA	novel transcript
ENSG00000138623	693.685044974242	2.25663272983859	0.469689708598856	4.80451815001528	1.55124629638127e-06	0.000207614208022347	SEMA7A	protein_coding	ENST00000261918	ENST00000261918	8482	GO:0001649	BP	semaphorin 7A (John Milton Hagen blood group) [Source:HGNC Symbol;Acc:HGNC:10741]
ENSG00000113657	486.249960301987	2.25624155193182	0.783680652999168	2.87903183943246	0.00398898059648819	0.0378434767221573	DPYSL3	protein_coding	ENST00000398514	ENST00000343218	1809	GO:0005515	MF	dihydropyrimidinase like 3 [Source:HGNC Symbol;Acc:HGNC:3015]
ENSG00000289259	22.6613039798822	2.25401865358707	0.868947689028916	2.5939635746152	0.00948765380850028	0.0653039729569459		lncRNA	ENST00000693006	ENST00000693006	NA	NA	NA	novel transcript
ENSG00000237734	33.6273471238041	2.25389460185732	0.586962918105482	3.83992673529042	0.000123071032645878	0.00412374014512715		lncRNA	ENST00000448858	ENST00000448858	NA	NA	NA	novel transcript
ENSG00000280326	38.2563945893468	2.25315103518414	0.473298719473352	4.76052637051558	1.93088701765737e-06	0.000242272684965509		TEC	ENST00000624905	ENST00000624905	NA	NA	NA	TEC
ENSG00000279956	37.6397793052318	2.25224551193439	0.916097333870569	2.4585220681939	0.0139510202043386	0.0836893520359598		protein_coding	ENST00000602369	ENST00000602369	NA	NA	NA	novel transcript
ENSG00000262700	8.91879623899338	2.25183075014663	0.560733567783273	4.0158657863996	5.92279567313106e-05	0.00255096715666584		processed_pseudogene	ENST00000572236	ENST00000572236	NA	NA	NA	thyroid hormone receptor interactor 11 (TRIP11) pseudogene
ENSG00000224019	7.29637177296757	2.25150575135836	0.871704848633958	2.58287625093136	0.00979804603483465	0.0667383214547611	RPL21P32	processed_pseudogene	ENST00000419877	ENST00000419877	NA	NA	NA	ribosomal protein L21 pseudogene 32 [Source:HGNC Symbol;Acc:HGNC:36978]
ENSG00000203280	12.1058006794926	2.25026657272325	0.767329180157072	2.93259611508924	0.00336140858531934	0.0339862841405743	KIAA1671-AS1	lncRNA	ENST00000366110	ENST00000366110	100128531	NA	NA	KIAA1671 antisense RNA 1 [Source:HGNC Symbol;Acc:HGNC:41238]
ENSG00000162849	462.534627093486	2.24296995089204	0.320411353821654	7.00028236870944	2.55447146436945e-12	2.30770952091136e-08	KIF26B	protein_coding	ENST00000407071	ENST00000407071	55083	GO:0003777	MF	kinesin family member 26B [Source:HGNC Symbol;Acc:HGNC:25484]
ENSG00000233496	16.0037892804129	2.24203326860792	0.688940844274857	3.25431898433568	0.00113664572119839	0.0173161171084423	SYNJ2-IT1	lncRNA	ENST00000442328	ENST00000442328	100874300	NA	NA	SYNJ2 intronic transcript 1 [Source:HGNC Symbol;Acc:HGNC:41387]
ENSG00000288821	78.6972545144495	2.24029228450054	0.454741719346003	4.92651584227298	8.37088282347662e-07	0.000137495555322341		lncRNA	ENST00000684867	ENST00000684867	105371354	NA	NA	novel transcript, sense intronic to WWOX
ENSG00000250582	58.8259154568256	2.23977265297371	0.441855929045743	5.06901119967057	3.99887701201815e-07	8.77557327527437e-05	SMAD1-AS2	lncRNA	ENST00000508936	ENST00000508936	101927659	NA	NA	SMAD1 antisense RNA 2 [Source:HGNC Symbol;Acc:HGNC:49381]
ENSG00000129946	25.3574366627804	2.23953087996934	0.903491471567563	2.4787515438123	0.0131843109391161	0.0806213036799393	SHC2	protein_coding	ENST00000264554	ENST00000264554	25759	GO:0005515	MF	SHC adaptor protein 2 [Source:HGNC Symbol;Acc:HGNC:29869]
ENSG00000198842	37.5699071905634	2.23942761270098	0.926682129668175	2.41660817771771	0.0156658704177528	0.0899605448459482	STYXL2	protein_coding	ENST00000361200	ENST00000361200	92235	GO:0005737	BP	serine/threonine/tyrosine interacting like 2 [Source:HGNC Symbol;Acc:HGNC:25034]
ENSG00000249131	35.8543454903258	2.2391493838523	0.619789773753573	3.61275625812855	0.000302959458770323	0.00755016758767201	PSD2-AS1	lncRNA	ENST00000657032	ENST00000657032	NA	NA	NA	PSD2 antisense RNA 1 [Source:HGNC Symbol;Acc:HGNC:52765]
ENSG00000138115	21.1516750105022	2.23857161360142	0.857231789563137	2.61139593848035	0.00901734263504972	0.063481529994186	CYP2C8	protein_coding	ENST00000371270	ENST00000371270	1558	GO:0002933	BP	cytochrome P450 family 2 subfamily C member 8 [Source:HGNC Symbol;Acc:HGNC:2622]
ENSG00000231728	259.107507265698	2.23665105222415	0.49503963780882	4.51812517907491	6.23895976479517e-06	0.000556669259408983	TMSB15B-AS1	lncRNA	ENST00000674336	ENST00000674336	NA	NA	NA	TMSB15B antisense RNA 1 [Source:HGNC Symbol;Acc:HGNC:53858]
ENSG00000177570	901.935720390961	2.23586806401553	0.555906616289499	4.02202096269198	5.7700921157793e-05	0.00250912212630326	SAMD12	protein_coding	ENST00000409003	ENST00000314727	401474	GO:0003674	MF	sterile alpha motif domain containing 12 [Source:HGNC Symbol;Acc:HGNC:31750]
ENSG00000255921	6.14818706080176	2.23529723340779	0.711353642027152	3.14231501934515	0.00167617589064896	0.0223279850596833		lncRNA	ENST00000546353	ENST00000546353	NA	NA	NA	novel transcript, antisense to BCAT1
ENSG00000238366	10.6647148002053	2.23526627590998	0.729763999654552	3.06299882834462	0.00219130917846655	0.0261942270833831	Y_RNA	misc_RNA	ENST00000459607	ENST00000459607	NA	NA	NA	Y RNA [Source:RFAM;Acc:RF00019]
ENSG00000250237	5.34786921619826	2.23384611366105	0.690811372160275	3.23365567459532	0.0012221670751296	0.0182195665952488		lncRNA	ENST00000688207	ENST00000688207	NA	NA	NA	novel transcript
ENSG00000283125	27.2187270701055	2.23129988134508	0.600690523914841	3.71455815018219	0.000203559058329164	0.00582869265592922		lncRNA	ENST00000634673	ENST00000634673	NA	NA	NA	novel transcript, antisense to BCL2
ENSG00000164756	15.3253435131695	2.2279534347095	0.724796221666318	3.07390321321957	0.00211277964504823	0.0256371407835671	SLC30A8	protein_coding	ENST00000521243	ENST00000456015	169026	GO:0000139	BP	solute carrier family 30 member 8 [Source:HGNC Symbol;Acc:HGNC:20303]
ENSG00000120833	275.158921654935	2.22686509748926	0.610103156155707	3.64998127779055	0.000262259423558403	0.00691247741043504	SOCS2	protein_coding	ENST00000340600	ENST00000551556	8835	GO:0001558	BP	suppressor of cytokine signaling 2 [Source:HGNC Symbol;Acc:HGNC:19382]
ENSG00000286633	222.374870109948	2.22525898102536	0.523001682056685	4.25478360274983	2.09251287119577e-05	0.00126408659455835		lncRNA	ENST00000666473	ENST00000666473	NA	NA	NA	novel transcript, antisense to RIPOR2
ENSG00000277718	11.5797047371067	2.22522913344996	0.823677547919507	2.70157798894795	0.0069011293416901	0.0539548268912405	LINC02255	lncRNA	ENST00000619758	ENST00000619758	NA	NA	NA	long intergenic non-protein coding RNA 2255 [Source:HGNC Symbol;Acc:HGNC:53153]
ENSG00000260816	34.7321539522396	2.22516793344887	0.443741801916329	5.01455559029897	5.31561829996388e-07	0.000102704716306779		lncRNA	ENST00000568885	ENST00000568885	NA	NA	NA	novel transcript, sense intronic to WWOX
ENSG00000259181	6.02058014408496	2.22441776831034	0.770380912511678	2.88742585931686	0.0038840813186946	0.0372591352621046		lncRNA	ENST00000560140	ENST00000560140	NA	NA	NA	novel transcript
ENSG00000113889	25.9218155680038	2.22387636848979	0.72571503189741	3.06439341992873	0.00218111874651012	0.0261415943694493	KNG1	protein_coding	ENST00000447445	ENST00000644859	3827	GO:0004869	BP	kininogen 1 [Source:HGNC Symbol;Acc:HGNC:6383]
ENSG00000253534	10.1815030088433	2.22326037646357	0.787755276111184	2.8222729112509	0.00476845794871518	0.0423789956799734	TRBV6-8	TR_V_gene	ENST00000390376	ENST00000390376	NA	GO:0002250	BP	T cell receptor beta variable 6-8 [Source:HGNC Symbol;Acc:HGNC:12233]
ENSG00000253335	34.1037896765729	2.22317822971446	0.643854199779784	3.45292184235942	0.000554549651881332	0.010950385912778		lncRNA	ENST00000522670	ENST00000522670	NA	NA	NA	novel transcript
ENSG00000259771	15.4102116262383	2.22234382957964	0.837619365220314	2.65316672686419	0.00797404724683648	0.0590713758326533		lncRNA	ENST00000560248	ENST00000560248	NA	NA	NA	novel transcript, sense intronic to MYO1E
ENSG00000280381	29.2763631448511	2.22187329637353	0.678266246537395	3.27581286510479	0.00105358346426982	0.0164201394132318		TEC	ENST00000624878	ENST00000624878	NA	NA	NA	novel transcript
ENSG00000136379	1691.96289352358	2.22121438265019	0.529735550476382	4.19306270959668	2.75213323585711e-05	0.00152298754381214	ABHD17C	protein_coding	ENST00000560609	ENST00000258884	58489	GO:0002084	BP	abhydrolase domain containing 17C, depalmitoylase [Source:HGNC Symbol;Acc:HGNC:26925]
ENSG00000242889	19.6738926218171	2.22081181442156	0.667397992724027	3.32756741649338	0.000876077885859715	0.0146023756842374	RN7SL449P	misc_RNA	ENST00000464937	ENST00000464937	NA	NA	NA	RNA, 7SL, cytoplasmic 449, pseudogene [Source:HGNC Symbol;Acc:HGNC:46465]
ENSG00000265584	4.08348850659776	2.21960132510173	0.836688411503053	2.65284100339619	0.00798174587908908	0.0590817128493588	MIR3978	miRNA	ENST00000585195	ENST00000585195	100616491	NA	NA	microRNA 3978 [Source:HGNC Symbol;Acc:HGNC:41630]
ENSG00000273381	15.3883435494246	2.21877010990706	0.67274539177084	3.29808295537586	0.000973473698671266	0.0156344202556377		lncRNA	ENST00000608358	ENST00000608358	NA	NA	NA	novel transcript
ENSG00000258869	29.4390348177022	2.21841717402331	0.741941807403981	2.99001505493463	0.00278963697465265	0.0305011563437362	LINC02312	lncRNA	ENST00000555187	ENST00000555187	100132612	NA	NA	long intergenic non-protein coding RNA 2312 [Source:HGNC Symbol;Acc:HGNC:53231]
ENSG00000171873	20.4320132747965	2.21709592064999	0.541074943693795	4.09757640136574	4.17498390592539e-05	0.00204982633728967	ADRA1D	protein_coding	ENST00000379453	ENST00000379453	146	GO:0004937	BP	adrenoceptor alpha 1D [Source:HGNC Symbol;Acc:HGNC:280]
ENSG00000229271	3.56493209406549	2.21692598152895	0.925661469643091	2.39496409241678	0.0166219930052955	0.0933414668592633		lncRNA	ENST00000426218	ENST00000693687	NA	NA	NA	novel transcript
ENSG00000248553	5.69953861079178	2.21493193637747	0.892608050950644	2.48141604147367	0.0130861534534122	0.0802656305996966	OR52H2P	unitary_pseudogene	ENST00000514607	ENST00000514607	NA	NA	NA	olfactory receptor family 52 subfamily H member 2 pseudogene [Source:HGNC Symbol;Acc:HGNC:15219]
ENSG00000184903	10234.3401211843	2.21414996277394	0.379001850670206	5.84205580753381	5.15605261859955e-09	3.96423654097262e-06	IMMP2L	protein_coding	ENST00000405709	ENST00000405709	83943	GO:0001541	BP	inner mitochondrial membrane peptidase subunit 2 [Source:HGNC Symbol;Acc:HGNC:14598]
ENSG00000236358	45.3941961603344	2.21212024189719	0.784300407755608	2.82050120084407	0.00479486940293911	0.042494805295526		lncRNA	ENST00000425104	ENST00000425104	NA	NA	NA	novel transcript
ENSG00000216921	75.4999597585612	2.21144590615997	0.540043308795648	4.09494177622851	4.22274494971263e-05	0.00207046284264336	FAM240C	protein_coding	ENST00000404031	ENST00000404031	285095	NA	NA	family with sequence similarity 240 member C [Source:HGNC Symbol;Acc:HGNC:54200]
ENSG00000226545	12.3099557644674	2.21089460095079	0.744006850623169	2.97160516613386	0.00296247394344918	0.0314673552454895		unprocessed_pseudogene	ENST00000445254	ENST00000445254	NA	NA	NA	ribosomal protein L27 (RPL27) pseudogene
ENSG00000262999	68.4595414958743	2.20963644684703	0.5488404080989	4.0260090442336	5.67315077075991e-05	0.00247291889327117		lncRNA	ENST00000572950	ENST00000572950	101927131	NA	NA	novel transcript, antisense to a novel protein gene
ENSG00000131459	16.6498081640381	2.20843594634912	0.777405808535773	2.84077623565569	0.00450038778803002	0.0409637312615246	GFPT2	protein_coding	ENST00000253778	ENST00000253778	9945	GO:0004360	MF	glutamine-fructose-6-phosphate transaminase 2 [Source:HGNC Symbol;Acc:HGNC:4242]
ENSG00000288551	4.8883206798441	2.20809571215359	0.827207517556897	2.66933709533377	0.00760011306992199	0.057336417681058		lncRNA	ENST00000655372	ENST00000655372	NA	NA	NA	novel transcript, antisense to SHPRH
ENSG00000278598	7.70754051588329	2.20808643951688	0.889654211731957	2.48196030592406	0.0130661829597747	0.0801765303845164	MIR6775	miRNA	ENST00000617557	ENST00000617557	102465464	NA	NA	microRNA 6775 [Source:HGNC Symbol;Acc:HGNC:50100]
ENSG00000237940	198.269672094681	2.20751489244741	0.612397144692815	3.6047112753191	0.000312500143837935	0.00767675404332266	LINC01238	lncRNA	ENST00000429456	ENST00000429456	102723927	NA	NA	long intergenic non-protein coding RNA 1238 [Source:HGNC Symbol;Acc:HGNC:49795]
ENSG00000237819	1026.2944624947	2.20737309841723	0.554563982645652	3.98037587635343	6.88063849760902e-05	0.00281265557409049	CDK6-AS1	lncRNA	ENST00000435695	ENST00000452050	101927497	NA	NA	CDK6 antisense RNA 1 [Source:HGNC Symbol;Acc:HGNC:40141]
ENSG00000268683	15.5339975144609	2.2062006811231	0.578576689945577	3.8131516866513	0.000137205844156596	0.00442567069186576		lncRNA	ENST00000599404	ENST00000599404	NA	NA	NA	novel transcript, sense intronic to SCGB2B2
ENSG00000223704	326.07441766258	2.20588372986175	0.451313896619997	4.88769290372436	1.02024509855049e-06	0.000156218546106867	LINC01422	lncRNA	ENST00000434868	ENST00000670559	NA	NA	NA	long intergenic non-protein coding RNA 1422 [Source:HGNC Symbol;Acc:HGNC:50728]
ENSG00000289905	3.02420510734786	2.20505734886959	0.846429022904802	2.60512965552882	0.00918394990395345	0.0641049282845783		lncRNA	ENST00000701545	ENST00000701545	NA	NA	NA	novel transcript
ENSG00000223373	12.5568371807084	2.20437030155403	0.819445089002342	2.69007689610759	0.00714355563750138	0.055158018486485		lncRNA	ENST00000437261	ENST00000437261	NA	NA	NA	novel transcript
ENSG00000251387	6.80093799874131	2.20417324261896	0.801515180766923	2.75000810403855	0.00595937908258934	0.0491213783139709		lncRNA	ENST00000506892	ENST00000506892	NA	NA	NA	novel transcript
ENSG00000257607	147.37881055444	2.20364812713739	0.427889472504519	5.15004053322231	2.60430170762049e-07	6.58105220325693e-05		lncRNA	ENST00000549241	ENST00000549241	NA	NA	NA	novel transcript, antisense to GPR146
ENSG00000102362	288.80581441615	2.20355527860715	0.770739108105085	2.8590157881371	0.00424957633980749	0.0395053054494917	SYTL4	protein_coding	ENST00000685623	ENST00000372989	94121	GO:0001778	BP	synaptotagmin like 4 [Source:HGNC Symbol;Acc:HGNC:15588]
ENSG00000218991	32.8948041752876	2.20321313272838	0.818826477320734	2.69069600672596	0.00713031351192464	0.0551146543458628	CCNG1P1	processed_pseudogene	ENST00000406783	ENST00000406783	NA	NA	NA	cyclin G1 pseudogene 1 [Source:HGNC Symbol;Acc:HGNC:39177]
ENSG00000114487	24.1105184730775	2.20298817091199	0.778417137093834	2.83008693659636	0.00465353573904916	0.0417034576347568	MORC1	protein_coding	ENST00000232603	ENST00000232603	27136	GO:0001662	BP	MORC family CW-type zinc finger 1 [Source:HGNC Symbol;Acc:HGNC:7198]
ENSG00000156475	788.410399019738	2.19977477894674	0.685444722969804	3.20926648820906	0.00133074090899758	0.0192774338522418	PPP2R2B	protein_coding	ENST00000394411	ENST00000394411	5521	GO:0000159	CC	protein phosphatase 2 regulatory subunit Bbeta [Source:HGNC Symbol;Acc:HGNC:9305]
ENSG00000286907	29.0816389696613	2.19939930129531	0.865709448999097	2.54057444312081	0.0110670530980351	0.0721252678505126		lncRNA	ENST00000656874	ENST00000656874	NA	NA	NA	novel transcript
ENSG00000200688	7.41558354090181	2.19901367188528	0.680136972065839	3.23319237477419	0.00122415098122451	0.0182236285718217	Y_RNA	misc_RNA	ENST00000363818	ENST00000363818	NA	NA	NA	Y RNA [Source:RFAM;Acc:RF00019]
ENSG00000289525	11.5662795269225	2.1986982731064	0.927328676361791	2.37100213673171	0.0177399285299902	0.0970976774995034		lncRNA	ENST00000687931	ENST00000687931	NA	NA	NA	novel transcript
ENSG00000095585	1273.5697592415	2.19637685016418	0.800872790153412	2.74247905181477	0.00609773391718125	0.0498073491933232	BLNK	protein_coding	ENST00000224337	ENST00000224337	29760	GO:0005068	BP	B cell linker [Source:HGNC Symbol;Acc:HGNC:14211]
ENSG00000186314	2420.57937424708	2.19550884349531	0.570737866234247	3.84679022259618	0.000119675351326222	0.00404924016434866	PRELID2	protein_coding	ENST00000510259	ENST00000683046	153768	GO:0005758	MF	PRELI domain containing 2 [Source:HGNC Symbol;Acc:HGNC:28306]
ENSG00000290404	25.2216046287657	2.19541848532862	0.586579762530299	3.74274502048681	0.000182020904373375	0.00539582231372952		lncRNA	ENST00000580161	ENST00000580161	NA	NA	NA	novel transcript
ENSG00000240490	5.6751901668357	2.19429104642889	0.767330615257886	2.85964224911244	0.00424119159442691	0.0394795722452888	RN7SL277P	misc_RNA	ENST00000481521	ENST00000481521	NA	NA	NA	RNA, 7SL, cytoplasmic 277, pseudogene [Source:HGNC Symbol;Acc:HGNC:46293]
ENSG00000288563	6.42892267266718	2.1926935425325	0.676017074684416	3.24354757393681	0.00118051094479075	0.0177571847304315		lncRNA	ENST00000673949	ENST00000673949	NA	NA	NA	novel transcript
ENSG00000179403	46.3919203735638	2.19140640558043	0.803367714840734	2.72777504634334	0.00637630750671678	0.0513187755980294	VWA1	protein_coding	ENST00000495558	ENST00000476993	64856	GO:0005201	MF	von Willebrand factor A domain containing 1 [Source:HGNC Symbol;Acc:HGNC:30910]
ENSG00000070961	22435.0973888902	2.1913774451579	0.541704098994432	4.04534034212731	5.2247163542012e-05	0.00234096558497118	ATP2B1	protein_coding	ENST00000359142	ENST00000428670	490	GO:0001772	MF	ATPase plasma membrane Ca2+ transporting 1 [Source:HGNC Symbol;Acc:HGNC:814]
ENSG00000176845	2942.69057690656	2.19133005139056	0.646963588645393	3.38709950582961	0.000706357634792328	0.0127249893275802	METRNL	protein_coding	ENST00000320095	ENST00000320095	284207	GO:0003674	MF	meteorin like, glial cell differentiation regulator [Source:HGNC Symbol;Acc:HGNC:27584]
ENSG00000236494	19.6711541160692	2.18895505657972	0.736248159022684	2.97312126319663	0.00294787962292984	0.0313861455669395		lncRNA	ENST00000668729	ENST00000668729	124901612	NA	NA	novel transcript
ENSG00000259362	3.4356908329597	2.18851023812167	0.799904684926607	2.73596377088661	0.00621978733360022	0.0505188211029395		lncRNA	ENST00000561283	ENST00000561283	101929457	NA	NA	novel transcript
ENSG00000235038	8.32422240686495	2.18841886620796	0.833263188920922	2.62632370576932	0.0086312690480202	0.0618200303726155		lncRNA	ENST00000419596	ENST00000419596	NA	NA	NA	novel transcript
ENSG00000230323	76.4563613863642	2.18780730517387	0.650284656891465	3.36438401550512	0.000767147208010456	0.0133727117745614	LINC00159	lncRNA	ENST00000411605	ENST00000414877	NA	NA	NA	long intergenic non-protein coding RNA 159 [Source:HGNC Symbol;Acc:HGNC:1285]
ENSG00000279044	11.8986706637605	2.18779239837776	0.72670647234613	3.01055857024997	0.00260767650132622	0.0291842684147873		TEC	ENST00000625100	ENST00000625100	NA	NA	NA	TEC
ENSG00000230184	25.080669626473	2.18759578427427	0.515312512179801	4.24518274361439	2.18415341062039e-05	0.00129813433628583	SMYD3-IT1	lncRNA	ENST00000426929	ENST00000426929	NA	NA	NA	SMYD3 intronic transcript 1 [Source:HGNC Symbol;Acc:HGNC:41406]
ENSG00000284624	123.763988861721	2.1860743939842	0.771363784495804	2.83403815154884	0.00459638441939695	0.041471896973615		lncRNA	ENST00000641650	ENST00000641650	NA	NA	NA	novel transcript
ENSG00000214216	29.8396298249183	2.1848193766902	0.645743750567446	3.383415441141	0.000715902491437908	0.0127815476435772	IQCJ	protein_coding	ENST00000481796	ENST00000397832	654502	NA	NA	IQ motif containing J [Source:HGNC Symbol;Acc:HGNC:32406]
ENSG00000247081	1866.94242909778	2.18306631640589	0.655289753666126	3.33145193281654	0.000863942187240035	0.01445233698372	BAALC-AS1	lncRNA	ENST00000521102	ENST00000499522	105369147	NA	NA	BAALC antisense RNA 1 [Source:HGNC Symbol;Acc:HGNC:50461]
ENSG00000122592	241.972665463016	2.18289293451128	0.901424807303925	2.42160290777897	0.0154522252540505	0.0891413811909912	HOXA7	protein_coding	ENST00000242159	ENST00000242159	3204	GO:0000122	BP	homeobox A7 [Source:HGNC Symbol;Acc:HGNC:5108]
ENSG00000078098	7.92572432275948	2.18205945604873	0.916737520106413	2.38024451731336	0.0173011534879436	0.0956552684308941	FAP	protein_coding	ENST00000462608	ENST00000188790	2191	GO:0001525	BP	fibroblast activation protein alpha [Source:HGNC Symbol;Acc:HGNC:3590]
ENSG00000109684	245.828757150954	2.18133138813505	0.829325078082898	2.63024891659794	0.00853223701968703	0.0614429886296155	CLNK	protein_coding	ENST00000226951	ENST00000226951	116449	GO:0002729	CC	cytokine dependent hematopoietic cell linker [Source:HGNC Symbol;Acc:HGNC:17438]
ENSG00000236816	31.7759792640083	2.18114708593318	0.917324209050769	2.37772759555773	0.01741968922068	0.0960155414396726	ANKRD20A7P	transcribed_unprocessed_pseudogene	ENST00000402318	ENST00000402318	NA	NA	NA	ankyrin repeat domain 20 family member A7, pseudogene [Source:HGNC Symbol;Acc:HGNC:31980]
ENSG00000259293	145.257766987376	2.17839586130524	0.819995597829709	2.65659458059388	0.00789343056688916	0.0586786683738134	LIPC-AS1	lncRNA	ENST00000561083	ENST00000561083	101928694	NA	NA	LIPC antisense RNA 1 [Source:HGNC Symbol;Acc:HGNC:52294]
ENSG00000267101	8.24020760468892	2.17786456004781	0.715816256725554	3.04249105770562	0.0023462878848263	0.0274653252368264		lncRNA	ENST00000660208	ENST00000660208	NA	NA	NA	novel transcript
ENSG00000106069	5484.59785138857	2.17750906325165	0.635358691446012	3.42721220716421	0.000609812316844686	0.0115675474443567	CHN2	protein_coding	ENST00000439384	ENST00000222792	1124	GO:0005096	MF	chimerin 2 [Source:HGNC Symbol;Acc:HGNC:1944]
ENSG00000253924	18.1123091007559	2.17732485884393	0.711354262452161	3.0608164929501	0.00220734334593982	0.0262988984994663		lncRNA	ENST00000522228	ENST00000522228	NA	NA	NA	novel transcript
ENSG00000250501	16.2957322828928	2.17663174944247	0.693131587396625	3.14028647521002	0.00168782696756996	0.0223746777477581		lncRNA	ENST00000502606	ENST00000666313	NA	NA	NA	novel transcript
ENSG00000279129	36.4210593448122	2.17653400255985	0.472406522931011	4.60733266140296	4.078672033041e-06	0.00040159916235959		TEC	ENST00000625162	ENST00000624947	NA	NA	NA	TEC
ENSG00000112137	3777.84205335545	2.17636746207374	0.278471941528932	7.81539228018643	5.47921181719837e-15	1.9799679822628e-10	PHACTR1	protein_coding	ENST00000693693	ENST00000332995	221692	GO:0003779	BP	phosphatase and actin regulator 1 [Source:HGNC Symbol;Acc:HGNC:20990]
ENSG00000173862	10.9740159251315	2.17609702879604	0.820011469343963	2.65373974651476	0.00796051978674067	0.0590437896169255		lncRNA	ENST00000311067	ENST00000311067	NA	NA	NA	novel transcript
ENSG00000126500	484.013150526904	2.17520700920509	0.378547168329451	5.74619807302849	9.12723827387358e-09	5.94362205103137e-06	FLRT1	protein_coding	ENST00000246841	ENST00000682287	23769	GO:0005615	BP	fibronectin leucine rich transmembrane protein 1 [Source:HGNC Symbol;Acc:HGNC:3760]
ENSG00000232325	14.5032270391188	2.1745363888279	0.847566063962323	2.56562465309438	0.0102990208210139	0.0689450567595701		lncRNA	ENST00000465755	ENST00000465755	NA	NA	NA	novel transcript
ENSG00000229313	122.885368725953	2.17379632730995	0.548276149181342	3.9647836779983	7.34625366881222e-05	0.00293128508651974		lncRNA	ENST00000428903	ENST00000428903	NA	NA	NA	novel transcript
ENSG00000287258	51.1113492653946	2.17285582545174	0.680314853144919	3.19389737767329	0.00140366005315096	0.0199538393708352		lncRNA	ENST00000658962	ENST00000658962	124901391	NA	NA	novel transcript, antisense to PKIB
ENSG00000265527	50.8345500222597	2.17060900074223	0.797154304536583	2.7229470986851	0.00647024176362351	0.051819294408311	MIR5690	miRNA	ENST00000583739	ENST00000583739	100847048	NA	NA	microRNA 5690 [Source:HGNC Symbol;Acc:HGNC:43490]
ENSG00000290551	161.902619429815	2.17021263764987	0.878477940323844	2.47042360204269	0.0134953141521323	0.0818369981878593		lncRNA	ENST00000637606	ENST00000637606	NA	NA	NA	novel transcript
ENSG00000225727	150.540401373843	2.17011620648134	0.394789334032072	5.49689674824153	3.86532862783169e-08	1.58724449199234e-05		transcribed_processed_pseudogene	ENST00000647828	ENST00000422303	NA	NA	NA	filamin A interacting protein 1-like (FILIP1L) pseudogene
ENSG00000214787	4311.61316167698	2.16847191267922	0.648302779186795	3.34484438798684	0.000823287478789487	0.0140397906246045	MS4A4E	protein_coding	ENST00000651255	ENST00000651255	643680	GO:0016020	CC	membrane spanning 4-domains A4E [Source:HGNC Symbol;Acc:HGNC:14284]
ENSG00000273464	5.76084946486994	2.1682351568204	0.812064494451573	2.67002826947226	0.00758448610788103	0.0572536014193417		lncRNA	ENST00000608759	ENST00000608759	NA	NA	NA	novel transcript, antisense to GRIK1
ENSG00000229052	20.6657332207945	2.1676688891591	0.827044637906395	2.62098173400459	0.00876769594990936	0.0625164043617952		transcribed_processed_pseudogene	ENST00000602631	ENST00000418249	NA	NA	NA	GAJ protein pseudogene
ENSG00000196730	7263.67222868234	2.16606690715819	0.391998458735624	5.52570261154791	3.28169606684873e-08	1.446187427703e-05	DAPK1	protein_coding	ENST00000358077	ENST00000408954	1612	GO:0002357	MF	death associated protein kinase 1 [Source:HGNC Symbol;Acc:HGNC:2674]
ENSG00000080854	250.940962101413	2.16547905163053	0.624449964499385	3.46781835974092	0.000524701819327466	0.0105866135919695	IGSF9B	protein_coding	ENST00000533871	ENST00000533871	22997	GO:0007155	CC	immunoglobulin superfamily member 9B [Source:HGNC Symbol;Acc:HGNC:32326]
ENSG00000187017	63.104012148538	2.16513996337483	0.750608081225461	2.88451459227561	0.00392017590311985	0.0374928087136326	ESPN	protein_coding	ENST00000645284	ENST00000645284	83715	GO:0005737	BP	espin [Source:HGNC Symbol;Acc:HGNC:13281]
ENSG00000146005	20.7936402413421	2.16385322320149	0.657671849773894	3.29017157104324	0.00100126311334976	0.0159390501603555	PSD2	protein_coding	ENST00000274710	ENST00000274710	84249	GO:0005085	CC	pleckstrin and Sec7 domain containing 2 [Source:HGNC Symbol;Acc:HGNC:19092]
ENSG00000280115	4.58286869364298	2.1636542320991	0.776682588577618	2.7857637906645	0.00534017697272714	0.0456631886148765		TEC	ENST00000625152	ENST00000625152	NA	NA	NA	TEC
ENSG00000286379	31.3490808037626	2.1634833083389	0.606685488965531	3.56607063740371	0.000362373736327607	0.00839406239482974		lncRNA	ENST00000657488	ENST00000657488	NA	NA	NA	novel transcript
ENSG00000203446	9.99624694217568	2.16206761451228	0.778407394840706	2.77755276843783	0.00547699460491101	0.0464056867632975	SUGCT-AS1	lncRNA	ENST00000415237	ENST00000415237	101928716	NA	NA	SUGCT antisense RNA 1 [Source:HGNC Symbol;Acc:HGNC:40745]
ENSG00000263597	5.24910677054019	2.16192950657033	0.732247697350692	2.9524565449537	0.00315256439189214	0.0327995474440743	MIR3936	miRNA	ENST00000584304	ENST00000584304	100500865	NA	NA	microRNA 3936 [Source:HGNC Symbol;Acc:HGNC:38947]
ENSG00000185022	667.607022299073	2.16086990284522	0.604778061837605	3.57299650764358	0.000352919469635739	0.00825977846810692	MAFF	protein_coding	ENST00000624676	ENST00000338483	23764	GO:0000122	BP	MAF bZIP transcription factor F [Source:HGNC Symbol;Acc:HGNC:6780]
ENSG00000139209	306.83707260465	2.16058176294136	0.345141972426456	6.25997976355002	3.850274324417e-10	6.62540538033965e-07	SLC38A4	protein_coding	ENST00000447411	ENST00000266579	55089	GO:0003333	BP	solute carrier family 38 member 4 [Source:HGNC Symbol;Acc:HGNC:14679]
ENSG00000215386	1026.63086288162	2.15986422793555	0.829549551345652	2.60365908755171	0.0092234450638967	0.0643060796505829	MIR99AHG	lncRNA	ENST00000635845	ENST00000653129	388815	NA	NA	mir-99a-let-7c cluster host gene [Source:HGNC Symbol;Acc:HGNC:1274]
ENSG00000284914	35.0150895631403	2.15873364263293	0.901889835399981	2.39356688356017	0.0166854388860268	0.0935814092170517		lncRNA	ENST00000647254	ENST00000647254	NA	NA	NA	novel transcript
ENSG00000112232	763.505883952327	2.15636145792119	0.60827256577524	3.54505788892998	0.000392526868480076	0.00882111375584331	KHDRBS2	protein_coding	ENST00000675091	ENST00000281156	202559	GO:0000381	BP	KH RNA binding domain containing, signal transduction associated 2 [Source:HGNC Symbol;Acc:HGNC:18114]
ENSG00000236130	37.5416681034353	2.15591081280591	0.703664621185809	3.06383289410343	0.00218520933708556	0.0261645873442425	PTCSC2	lncRNA	ENST00000649461	ENST00000649461	101928337	NA	NA	papillary thyroid carcinoma susceptibility candidate 2 [Source:HGNC Symbol;Acc:HGNC:44086]
ENSG00000227583	4.27663261370065	2.15452677776521	0.868537544438892	2.48063747106882	0.0131147681747828	0.0803405990561278	RPS3AP37	processed_pseudogene	ENST00000419176	ENST00000419176	NA	NA	NA	RPS3A pseudogene 37 [Source:HGNC Symbol;Acc:HGNC:36691]
ENSG00000270390	22.1170893589777	2.15305645366886	0.730480895131441	2.94745073829952	0.00320405797982123	0.0330144964809866	SFXN4P1	processed_pseudogene	ENST00000603317	ENST00000603317	NA	NA	NA	SFXN4 pseudogene 1 [Source:HGNC Symbol;Acc:HGNC:54574]
ENSG00000233968	366.929187768131	2.15262564931636	0.710320051065193	3.03050103413003	0.00244148350957539	0.0281420887087772		lncRNA	ENST00000451713	ENST00000702382	101928834	NA	NA	novel transcript, antisense to C10orf112
ENSG00000047617	67.9508548674676	2.15140450617391	0.855194696888209	2.515689718379	0.0118799719329617	0.0754899561735656	ANO2	protein_coding	ENST00000536751	ENST00000682330	57101	GO:0005229	MF	anoctamin 2 [Source:HGNC Symbol;Acc:HGNC:1183]
ENSG00000290095	24.9084691675077	2.15087129431607	0.721446611982127	2.98133120121903	0.002869982161322	0.0309673560410666		lncRNA	ENST00000702955	ENST00000702955	NA	NA	NA	novel transcript, antisense to PRKAG2
ENSG00000279041	24.1803951212749	2.14995970198171	0.629086777784072	3.41758844392635	0.000631785629369706	0.0118845421670503		TEC	ENST00000623026	ENST00000623026	NA	NA	NA	TEC
ENSG00000285417	5497.18360140653	2.14929777758302	0.827514887560051	2.59729197612417	0.00939620155998564	0.0649263850851363		transcribed_unitary_pseudogene	ENST00000647075	ENST00000647316	NA	NA	NA	novel pseudogene
ENSG00000291174	42.296958236179	2.14844097828457	0.465626318011007	4.6140883691067	3.94824424368277e-06	0.000393040644599781		lncRNA	ENST00000702924	ENST00000309775	NA	NA	NA	novel transcript
ENSG00000133216	357.501421581218	2.14835892915289	0.828508571470517	2.59304369698888	0.00951306828470803	0.0654290513011438	EPHB2	protein_coding	ENST00000374630	ENST00000374630	2048	GO:0001525	BP	EPH receptor B2 [Source:HGNC Symbol;Acc:HGNC:3393]
ENSG00000182674	9.31440862840956	2.14742972610554	0.894087761979514	2.40181089309524	0.0163141396916859	0.0921569097856437	KCNB2	protein_coding	ENST00000523207	ENST00000523207	9312	GO:0005251	BP	potassium voltage-gated channel subfamily B member 2 [Source:HGNC Symbol;Acc:HGNC:6232]
ENSG00000137225	73.6214520335144	2.14450853195839	0.587966267061042	3.64733259728954	0.000264976836744895	0.00694680599192446	CAPN11	protein_coding	ENST00000532171	ENST00000398776	11131	GO:0001669	CC	calpain 11 [Source:HGNC Symbol;Acc:HGNC:1478]
ENSG00000159713	97.0902297302511	2.14413627285499	0.640780420715869	3.34613262755376	0.000819471891622978	0.0139945351019319	TPPP3	protein_coding	ENST00000393957	ENST00000393957	51673	GO:0001578	BP	tubulin polymerization promoting protein family member 3 [Source:HGNC Symbol;Acc:HGNC:24162]
ENSG00000196628	8449.20684063254	2.14391014474393	0.412694609114581	5.19490707509749	2.04822122940368e-07	5.48255721079491e-05	TCF4	protein_coding	ENST00000354452	ENST00000354452	6925	GO:0000785	CC	transcription factor 4 [Source:HGNC Symbol;Acc:HGNC:11634]
ENSG00000133069	1103.08002561567	2.1396426367228	0.749884543295039	2.85329609185046	0.0043268285876376	0.0400190114775716	TMCC2	protein_coding	ENST00000358024	ENST00000358024	9911	GO:0005515	MF	transmembrane and coiled-coil domain family 2 [Source:HGNC Symbol;Acc:HGNC:24239]
ENSG00000206703	3.82460603407284	2.13926540407474	0.904405772392491	2.36538229783251	0.0180114675365135	0.0981396849969015	RNU6-128P	snRNA	ENST00000383976	ENST00000383976	NA	NA	NA	RNA, U6 small nuclear 128, pseudogene [Source:HGNC Symbol;Acc:HGNC:47091]
ENSG00000287218	62.5654273498235	2.1378216869119	0.687904660088795	3.10772961857237	0.00188530465207306	0.0240206035843305		lncRNA	ENST00000660512	ENST00000660512	NA	NA	NA	novel transcript, antisense to CD247
ENSG00000289622	4.91848972877719	2.13758089340596	0.809666833358369	2.64007466446367	0.00828877638136872	0.0603390860832272		lncRNA	ENST00000690140	ENST00000690140	NA	NA	NA	novel transcript
ENSG00000172985	1354.49942031639	2.13699546475441	0.547894081495874	3.90038063364351	9.60415703197975e-05	0.00352329403519057	SH3RF3	protein_coding	ENST00000309415	ENST00000309415	344558	GO:0005515	BP	SH3 domain containing ring finger 3 [Source:HGNC Symbol;Acc:HGNC:24699]
ENSG00000187147	16351.5971507172	2.13617050586847	0.47970123776426	4.45312694172836	8.46286861830151e-06	0.000685682108499873	RNF220	protein_coding	ENST00000355387	ENST00000361799	55182	GO:0003358	BP	ring finger protein 220 [Source:HGNC Symbol;Acc:HGNC:25552]
ENSG00000266970	21.1366475192761	2.13585825815491	0.731725960280714	2.91893191453194	0.00351232928317791	0.0349141181491018	SOCS3-DT	lncRNA	ENST00000687996	ENST00000592569	101928674	NA	NA	SOCS3 divergent transcript [Source:HGNC Symbol;Acc:HGNC:52799]
ENSG00000253188	9.65564652649142	2.13543079605981	0.727393251052587	2.93573083468907	0.00332762925381759	0.0338057944098826	TRBV6-7	TR_V_gene	ENST00000390373	ENST00000390373	NA	GO:0002250	BP	T cell receptor beta variable 6-7 (non-functional) [Source:HGNC Symbol;Acc:HGNC:12232]
ENSG00000224063	4874.51356928894	2.13371847970298	0.691036733147656	3.08770630757057	0.00201707707595111	0.0249791285868983	CALCRL-AS1	lncRNA	ENST00000453517	ENST00000412276	NA	NA	NA	CALCRL and TFPI antisense RNA 1 [Source:HGNC Symbol;Acc:HGNC:55863]
ENSG00000188886	63.0829849760853	2.13228002632232	0.383372710881134	5.56189829323414	2.66855810325266e-08	1.2688291528834e-05	ASTL	protein_coding	ENST00000342380	ENST00000342380	431705	GO:0004222	BP	astacin like metalloendopeptidase [Source:HGNC Symbol;Acc:HGNC:31704]
ENSG00000234303	6.13238076178778	2.13148565640632	0.810249430079308	2.6306536941318	0.00852208259774546	0.0613943334832795	CLYBL-AS1	lncRNA	ENST00000670609	ENST00000670609	NA	NA	NA	CLYBL antisense RNA 1 [Source:HGNC Symbol;Acc:HGNC:39893]
ENSG00000254057	5.31340695591285	2.13116553051968	0.847866535101446	2.51356250340119	0.0119518597130509	0.075783892365469		lncRNA	ENST00000520962	ENST00000520962	NA	NA	NA	novel transcript
ENSG00000235488	218.815627264197	2.13103055169695	0.486588036779403	4.3795374950064	1.18931457713756e-05	0.000832888983710134	JARID2-AS1	lncRNA	ENST00000441978	ENST00000441978	NA	NA	NA	JARID2 antisense RNA 1 [Source:HGNC Symbol;Acc:HGNC:40314]
ENSG00000042980	2813.06427258482	2.1302076771747	0.451677524519964	4.71621358498778	2.40274204933811e-06	0.00028374342057151	ADAM28	protein_coding	ENST00000523379	ENST00000265769	10863	GO:0004222	BP	ADAM metallopeptidase domain 28 [Source:HGNC Symbol;Acc:HGNC:206]
ENSG00000274253	166.338438221403	2.12879005740796	0.791061471624333	2.69105516292784	0.00712264164209124	0.055090870280732		lncRNA	ENST00000619879	ENST00000619611	283683	NA	NA	novel transcript, sense overlapping NIPA1
ENSG00000143850	194.675190117857	2.12814772155488	0.513608865568258	4.14351827669542	3.4201779945821e-05	0.00178600508688178	PLEKHA6	protein_coding	ENST00000272203	ENST00000272203	22874	GO:0005515	MF	pleckstrin homology domain containing A6 [Source:HGNC Symbol;Acc:HGNC:17053]
ENSG00000184489	715.107050775315	2.12790723190319	0.646725292174676	3.29027990346241	0.00100087767714771	0.0159390501603555	PTP4A3	protein_coding	ENST00000520105	ENST00000521578	11156	GO:0004725	BP	protein tyrosine phosphatase 4A3 [Source:HGNC Symbol;Acc:HGNC:9636]
ENSG00000275572	12.8292101499632	2.12733847679058	0.497707560833394	4.27427397974109	1.91761117712186e-05	0.00119473788787027	GRIFIN	protein_coding	ENST00000614228	ENST00000614228	402635	GO:0030246	MF	galectin-related inter-fiber protein [Source:HGNC Symbol;Acc:HGNC:4577]
ENSG00000275367	10.2656793826735	2.12723126225653	0.733982489274189	2.89820437591104	0.00375305936556482	0.0364768288203419		lncRNA	ENST00000618256	ENST00000618256	NA	NA	NA	novel transcript
ENSG00000073756	2997.63475066828	2.12687368781751	0.698357839680959	3.04553563655727	0.00232266251626881	0.0272594130197758	PTGS2	protein_coding	ENST00000367468	ENST00000367468	5743	GO:0001516	BP	prostaglandin-endoperoxide synthase 2 [Source:HGNC Symbol;Acc:HGNC:9605]
ENSG00000132464	21.396240813504	2.12536820879086	0.872498075699306	2.43595747427567	0.0148524305167718	0.0870087465522073	ENAM	protein_coding	ENST00000396073	ENST00000396073	10117	GO:0005515	BP	enamelin [Source:HGNC Symbol;Acc:HGNC:3344]
ENSG00000248268	73.2710651533237	2.12483937297096	0.85245185691177	2.4926209682606	0.0126804128275164	0.0788266640177419		lncRNA	ENST00000504081	ENST00000504081	NA	NA	NA	novel transcript
ENSG00000128833	844.309890897357	2.12335641662429	0.465332114287689	4.56309880927654	5.04040778010537e-06	0.000478058203522015	MYO5C	protein_coding	ENST00000261839	ENST00000261839	55930	GO:0000146	MF	myosin VC [Source:HGNC Symbol;Acc:HGNC:7604]
ENSG00000289563	16.9960919411308	2.12324674537896	0.812714617715397	2.61253667535545	0.00898730489228625	0.0633688548320683		lncRNA	ENST00000690925	ENST00000690925	NA	NA	NA	novel transcript
ENSG00000179583	9994.06564541996	2.12158273880711	0.436671322472263	4.85853462232312	1.18257731615993e-06	0.000171620939344398	CIITA	protein_coding	ENST00000637439	ENST00000324288	4261	GO:0000122	BP	class II major histocompatibility complex transactivator [Source:HGNC Symbol;Acc:HGNC:7067]
ENSG00000136244	27.7272427407766	2.12144728930269	0.74175019310778	2.86005626828928	0.0042356584730476	0.0394483903561979	IL6	protein_coding	ENST00000404625	ENST00000258743	3569	GO:0001781	BP	interleukin 6 [Source:HGNC Symbol;Acc:HGNC:6018]
ENSG00000168955	22.957559941366	2.1210161275473	0.710428617232924	2.98554432647791	0.00283074108598076	0.0307182161810813	TM4SF20	protein_coding	ENST00000304568	ENST00000304568	79853	GO:0005515	MF	transmembrane 4 L six family member 20 [Source:HGNC Symbol;Acc:HGNC:26230]
ENSG00000255027	4.96583315554584	2.11914853651646	0.861089711924564	2.46100784525702	0.0138547336469973	0.0833141472764895		lncRNA	ENST00000533033	ENST00000533033	NA	NA	NA	novel transcript, antisense to DDX25
ENSG00000171132	9679.79373355166	2.11875915271631	0.41383965974002	5.11975858970921	3.05927019467388e-07	7.32117799700235e-05	PRKCE	protein_coding	ENST00000421201	ENST00000306156	5581	GO:0000165	BP	protein kinase C epsilon [Source:HGNC Symbol;Acc:HGNC:9401]
ENSG00000288835	9.15564265241834	2.11850001553348	0.789251843105144	2.68418760632688	0.00727062949318648	0.0558527779264002		lncRNA	ENST00000689293	ENST00000689293	NA	NA	NA	novel transcript
ENSG00000176105	1279.82519747565	2.1179997045757	0.42314941880371	5.00532344003571	5.5768309679948e-07	0.000106065454662874	YES1	protein_coding	ENST00000577961	ENST00000314574	7525	GO:0001784	MF	YES proto-oncogene 1, Src family tyrosine kinase [Source:HGNC Symbol;Acc:HGNC:12841]
ENSG00000113525	28.6357159477907	2.11740216113097	0.470674726451606	4.49865276832254	6.83854465487369e-06	0.000598347819972193	IL5	protein_coding	ENST00000231454	ENST00000231454	3567	GO:0002639	BP	interleukin 5 [Source:HGNC Symbol;Acc:HGNC:6016]
ENSG00000259630	13.9858367319867	2.11643959899153	0.633200458569694	3.34244798838626	0.000830429164846183	0.014108316079399	FABP5P9	transcribed_processed_pseudogene	ENST00000559487	ENST00000559487	NA	NA	NA	fatty acid binding protein 5 pseudogene 9 [Source:HGNC Symbol;Acc:HGNC:31064]
ENSG00000201586	4.26967104632558	2.11553554083681	0.746666139813072	2.83330852711017	0.00460688978819356	0.041523909616718	RNU6-593P	snRNA	ENST00000364716	ENST00000364716	NA	NA	NA	RNA, U6 small nuclear 593, pseudogene [Source:HGNC Symbol;Acc:HGNC:47556]
ENSG00000215146	14.1497403538682	2.11510867710541	0.872202091174304	2.42502133222095	0.015307487250107	0.0885325478985062		transcribed_unprocessed_pseudogene	ENST00000423987	ENST00000423987	NA	NA	NA	zinc finger protein pseudogene
ENSG00000232629	363.598071951694	2.11490393705259	0.790951630303864	2.67387265671365	0.00749809175672342	0.0568389015567354	HLA-DQB2	protein_coding	ENST00000411527	ENST00000437316	3120	GO:0000139	CC	major histocompatibility complex, class II, DQ beta 2 [Source:HGNC Symbol;Acc:HGNC:4945]
ENSG00000273160	51.4576984238545	2.1142413386599	0.72020933308964	2.9355928082603	0.00332911007778564	0.033811332706819		lncRNA	ENST00000610044	ENST00000610044	NA	NA	NA	novel transcript
ENSG00000288928	757.912488390383	2.11387935419011	0.636435032575088	3.32143776818368	0.00089554951122673	0.0147769758619585		lncRNA	ENST00000692625	ENST00000692625	NA	NA	NA	novel transcript, sense intronic to HIF1A
ENSG00000137968	48.8337871017936	2.11380734260019	0.883810018995119	2.39169877820979	0.0167705998719509	0.0939715300004371	SLC44A5	protein_coding	ENST00000370859	ENST00000370859	204962	GO:0005515	MF	solute carrier family 44 member 5 [Source:HGNC Symbol;Acc:HGNC:28524]
ENSG00000243403	8.38938846473805	2.11219836316048	0.730996914768571	2.88947644030644	0.00385883921572798	0.0370921336959738		processed_pseudogene	ENST00000483963	ENST00000483963	NA	NA	NA	ribosomal protein S26 (RPS26) pseudogene
ENSG00000126838	795.645246860745	2.11055075122664	0.74929183737708	2.81672726959724	0.00485157042142165	0.0428436824898565	PZP	protein_coding	ENST00000261336	ENST00000261336	5858	GO:0002020	BP	PZP alpha-2-macroglobulin like [Source:HGNC Symbol;Acc:HGNC:9750]
ENSG00000196126	10508.9745259395	2.1102184613284	0.567967000791959	3.71538920110846	0.00020289115685731	0.00581878955888551	HLA-DRB1	protein_coding	ENST00000696610	ENST00000360004	3123	GO:0000139	CC	major histocompatibility complex, class II, DR beta 1 [Source:HGNC Symbol;Acc:HGNC:4948]
ENSG00000142233	56.6363472261352	2.1097485951376	0.542312702884929	3.89028061469779	0.000100128365682718	0.00359665867028898	NTN5	protein_coding	ENST00000270235	ENST00000270235	126147	GO:0005576	CC	netrin 5 [Source:HGNC Symbol;Acc:HGNC:25208]
ENSG00000266901	27.5290551772531	2.1092886041127	0.520895703014678	4.04934921118608	5.13602577157931e-05	0.00231994284102237		lncRNA	ENST00000587315	ENST00000587315	NA	NA	NA	novel transcript, antisense to CTDP1
ENSG00000189229	6.91602926825863	2.10864364622923	0.795980880977002	2.64911343554011	0.00807032385773023	0.0594918855411954		lncRNA	ENST00000433639	ENST00000655754	NA	NA	NA	novel transcript
ENSG00000183317	3.94130968454459	2.10808498856472	0.882845904149922	2.38782892762533	0.0169482288758029	0.0946293570234879	EPHA10	protein_coding	ENST00000432874	ENST00000373048	284656	GO:0005005	MF	EPH receptor A10 [Source:HGNC Symbol;Acc:HGNC:19987]
ENSG00000249318	20.5170394948383	2.1076161236611	0.842053106874686	2.50294916847181	0.0123163231784	0.0773618380626912		lncRNA	ENST00000511981	ENST00000511981	NA	NA	NA	novel transcript
ENSG00000203601	20.9246318723072	2.1062125194286	0.623140840595004	3.37999434833622	0.000724873203464444	0.0128558173122703	LINC00970	lncRNA	ENST00000366408	ENST00000366408	101978719	NA	NA	long intergenic non-protein coding RNA 970 [Source:HGNC Symbol;Acc:HGNC:48730]
ENSG00000285579	226.597531834442	2.10534874741099	0.661011623974798	3.18504043053146	0.00144733785915621	0.0204221010849156		lncRNA	ENST00000647843	ENST00000647843	NA	NA	NA	novel transcript
ENSG00000240474	8.10583208710719	2.10280498868731	0.677634370448691	3.10315574355379	0.00191468849929535	0.0242089515782144	RN7SL116P	misc_RNA	ENST00000470786	ENST00000470786	NA	NA	NA	RNA, 7SL, cytoplasmic 116, pseudogene [Source:HGNC Symbol;Acc:HGNC:46132]
ENSG00000184698	7.90346974142803	2.10155213624454	0.765738656813154	2.74447700602026	0.00606074002125368	0.0496426747158831	OR51M1	protein_coding	ENST00000641529	ENST00000642046	390059	GO:0004930	BP	olfactory receptor family 51 subfamily M member 1 [Source:HGNC Symbol;Acc:HGNC:14847]
ENSG00000113249	51.319508815887	2.10153809542719	0.619021267431279	3.39493682365363	0.000686444384358388	0.012557955563593	HAVCR1	protein_coding	ENST00000339252	ENST00000523175	26762	GO:0001618	MF	hepatitis A virus cellular receptor 1 [Source:HGNC Symbol;Acc:HGNC:17866]
ENSG00000188897	1009.0884650748	2.10053879576491	0.622017242104655	3.37697840763632	0.000732868029271033	0.0129500826922924		protein_coding	ENST00000595168	ENST00000696174	400499	NA	NA	novel lipoprotein amino terminal region containing protein
ENSG00000154358	1602.63842000062	2.09988779120893	0.520334092150762	4.03565290624951	5.44506638457056e-05	0.00240247764191504	OBSCN	protein_coding	ENST00000570156	ENST00000680850	84033	GO:0004674	MF	obscurin, cytoskeletal calmodulin and titin-interacting RhoGEF [Source:HGNC Symbol;Acc:HGNC:15719]
ENSG00000248115	74.6539384656685	2.09866901937443	0.41682829088474	5.03485263660943	4.78216574470719e-07	9.60046340837439e-05		lncRNA	ENST00000510351	ENST00000508813	NA	NA	NA	novel transcript
ENSG00000164849	307.178760265421	2.09799231484617	0.327798242558268	6.40025492044314	1.55117748942836e-10	4.0038106969988e-07	GPR146	protein_coding	ENST00000444847	ENST00000444847	115330	GO:0004930	MF	G protein-coupled receptor 146 [Source:HGNC Symbol;Acc:HGNC:21718]
ENSG00000255856	23.9436056478019	2.09795088719175	0.635860806691937	3.29938701223988	0.000968962249392407	0.0155918465312738		lncRNA	ENST00000538710	ENST00000538710	NA	NA	NA	novel transcript
ENSG00000234345	14.8714195326621	2.09682412975725	0.587455527052317	3.56933254212197	0.000357891898895944	0.00832164821216243	ELF2P1	processed_pseudogene	ENST00000417646	ENST00000417646	NA	NA	NA	ELF2 pseudogene 1 [Source:HGNC Symbol;Acc:HGNC:33539]
ENSG00000251031	22.8561265741251	2.09638237254465	0.63371602066378	3.30807854652122	0.000939384585579622	0.0152872382709414		lncRNA	ENST00000504204	ENST00000659832	NA	NA	NA	novel transcript
ENSG00000219547	4.89882252074898	2.09605622715215	0.714516337933545	2.933531559564	0.00335129581535585	0.0339412627757003	RPL17P25	processed_pseudogene	ENST00000404330	ENST00000404330	NA	NA	NA	ribosomal protein L17 pseudogene 25 [Source:HGNC Symbol;Acc:HGNC:36844]
ENSG00000224430	20.9665035604817	2.09594427402678	0.558841454469226	3.75051681879515	0.000176470467209143	0.00527892119459402	MKRN5P	processed_pseudogene	ENST00000445263	ENST00000445263	NA	NA	NA	makorin ring finger protein 5, pseudogene [Source:HGNC Symbol;Acc:HGNC:7117]
ENSG00000228826	14.162800583145	2.09331414415273	0.567778039271268	3.68685295901803	0.000227044457171827	0.00623212717616442		lncRNA	ENST00000437523	ENST00000437523	NA	NA	NA	novel transcript
ENSG00000212331	3.32632289015998	2.09280389758871	0.79514428211759	2.63198006280728	0.00848888441984046	0.0612773326798552	RNA5SP297	rRNA_pseudogene	ENST00000391029	ENST00000391029	NA	NA	NA	RNA, 5S ribosomal pseudogene 297 [Source:HGNC Symbol;Acc:HGNC:43197]
ENSG00000287635	9.76126765597829	2.09235915737613	0.742108972738269	2.81947696934002	0.00481019826697552	0.0425655189640904		lncRNA	ENST00000669430	ENST00000669430	NA	NA	NA	novel transcript
ENSG00000213891	48.1198389043709	2.09234592192856	0.653816720431609	3.20020252854244	0.00137331049688198	0.0196616276209696	RPL3P6	processed_pseudogene	ENST00000474162	ENST00000474162	NA	NA	NA	ribosomal protein L3 pseudogene 6 [Source:HGNC Symbol;Acc:HGNC:36395]
ENSG00000225329	49.7237304218486	2.09156946558334	0.692365345135947	3.02090432497406	0.00252020979620356	0.0285755573252626	LHFPL3-AS2	lncRNA	ENST00000631061	ENST00000631061	723809	NA	NA	LHFPL3 antisense RNA 2 [Source:HGNC Symbol;Acc:HGNC:44106]
ENSG00000073792	6990.19201895542	2.09138636170139	0.616272269016548	3.39360777183572	0.000689784108643397	0.0125742264568946	IGF2BP2	protein_coding	ENST00000382199	ENST00000382199	10644	GO:0000932	CC	insulin like growth factor 2 mRNA binding protein 2 [Source:HGNC Symbol;Acc:HGNC:28867]
ENSG00000250406	12.4766821923631	2.09105727989241	0.608548374048615	3.4361397861945	0.000590066436230036	0.0113189858074242		lncRNA	ENST00000512833	ENST00000512833	124900792	NA	NA	novel transcript
ENSG00000083307	11.3020852941111	2.09007371361614	0.624437486772439	3.34713043001182	0.000816527821278776	0.0139574500235241	GRHL2	protein_coding	ENST00000521085	ENST00000646743	79977	GO:0000785	BP	grainyhead like transcription factor 2 [Source:HGNC Symbol;Acc:HGNC:2799]
ENSG00000237356	1906.25600614096	2.08967765640631	0.443671798843317	4.70996277395643	2.47762040462468e-06	0.000290686009550382		lncRNA	ENST00000454942	ENST00000648066	NA	NA	NA	novel transcript
ENSG00000230562	26.4260172455458	2.08894003480638	0.567664346163308	3.67988592013039	0.000233338316364162	0.00634933237961999	FAM133DP	processed_pseudogene	ENST00000464802	ENST00000464802	NA	NA	NA	family with sequence similarity 133 member D, pseudogene [Source:HGNC Symbol;Acc:HGNC:44192]
ENSG00000228540	11.3905185437858	2.08812634161119	0.543810634389388	3.83980416998615	0.000123132488836401	0.00412374014512715		lncRNA	ENST00000451832	ENST00000451832	NA	NA	NA	novel transcript
ENSG00000229618	47.0206297926583	2.0879782699017	0.447522643472685	4.66563714787572	3.07662204762393e-06	0.000337495355224526		lncRNA	ENST00000639998	ENST00000639998	NA	NA	NA	novel transcript
ENSG00000253535	2961.40295164822	2.08735254294911	0.411711959897309	5.06993419251105	3.97953277269875e-07	8.77557327527437e-05	ADAM7-AS1	lncRNA	ENST00000518988	ENST00000519689	NA	NA	NA	ADAM7, ADAMDEC1 and ADAM28 antisense RNA 1 [Source:HGNC Symbol;Acc:HGNC:56152]
ENSG00000223865	8978.86564254014	2.08729067341373	0.531377192059827	3.92807727656239	8.56276993482445e-05	0.00326288042829279	HLA-DPB1	protein_coding	ENST00000418931	ENST00000418931	3115	GO:0000139	CC	major histocompatibility complex, class II, DP beta 1 [Source:HGNC Symbol;Acc:HGNC:4940]
ENSG00000248690	57.8569472469508	2.08686197718883	0.597418788963593	3.49313080830474	0.000477392597295205	0.00998442189439976	HAS2-AS1	lncRNA	ENST00000518865	ENST00000664717	124906789	NA	NA	HAS2 antisense RNA 1 [Source:HGNC Symbol;Acc:HGNC:34340]
ENSG00000116675	1130.21363730758	2.08622538815209	0.533113262919606	3.91328735047189	9.10480813162912e-05	0.00340944400667927	DNAJC6	protein_coding	ENST00000463018	ENST00000371069	9829	GO:0004725	MF	DnaJ heat shock protein family (Hsp40) member C6 [Source:HGNC Symbol;Acc:HGNC:15469]
ENSG00000285918	3.8359877797478	2.08594754023684	0.839002500844909	2.48622326886536	0.0129106937587929	0.0796552551933991		lncRNA	ENST00000649926	ENST00000649926	NA	NA	NA	novel transcript, antisense to WWOX
ENSG00000167355	161.301730239081	2.08589052818629	0.510684420728887	4.08450002294793	4.41718220983574e-05	0.00213394781196022	OR51B5	protein_coding	ENST00000420726	ENST00000300773	282763	GO:0004930	BP	olfactory receptor family 51 subfamily B member 5 [Source:HGNC Symbol;Acc:HGNC:19599]
ENSG00000286565	21.9760773872102	2.08533088894011	0.568733453160211	3.66662252299879	0.000245775185178328	0.00659341654907503		lncRNA	ENST00000658865	ENST00000658865	NA	NA	NA	novel transcript
ENSG00000285622	34.5162383846503	2.08522746689866	0.535667181639554	3.89276688655119	9.91073750553072e-05	0.00357806433071695		lncRNA	ENST00000650631	ENST00000650631	NA	NA	NA	novel transcript
ENSG00000261065	3.47140342996387	2.08226534178448	0.859059806951494	2.42388868031636	0.0153553115965599	0.08869557862105		lncRNA	ENST00000565388	ENST00000565388	NA	NA	NA	novel transcript
ENSG00000260733	163.94849350485	2.0817581988592	0.42113692724315	4.94318608554899	7.685605947797e-07	0.000132250979299806		lncRNA	ENST00000563408	ENST00000563408	NA	NA	NA	novel transcript, antisense to WWOX
ENSG00000228791	19.3368677780776	2.08021546349413	0.82326484106504	2.52678768694044	0.0115111067583551	0.0741339072928034	THRB-AS1	lncRNA	ENST00000432368	ENST00000630391	NA	NA	NA	THRB antisense RNA 1 [Source:HGNC Symbol;Acc:HGNC:44515]
ENSG00000138798	112.748105048025	2.07983001911495	0.606401757357821	3.42978890459861	0.000604050992406727	0.0115065823203002	EGF	protein_coding	ENST00000265171	ENST00000265171	1950	GO:0001525	BP	epidermal growth factor [Source:HGNC Symbol;Acc:HGNC:3229]
ENSG00000027075	7128.00454407115	2.07933816644339	0.350100476077791	5.93926117935745	2.86309424746721e-09	2.79975634081015e-06	PRKCH	protein_coding	ENST00000555185	ENST00000332981	5583	GO:0004672	MF	protein kinase C eta [Source:HGNC Symbol;Acc:HGNC:9403]
ENSG00000259202	126.217130564554	2.07917498159904	0.578990708831076	3.59103341363921	0.000329369401984954	0.00790311600938133		lncRNA	ENST00000558463	ENST00000558463	NA	NA	NA	novel transcript, antisense to SMAD3
ENSG00000080493	618.741112921221	2.07812516927101	0.866001089894535	2.39967962341029	0.0164094267334903	0.092562593077973	SLC4A4	protein_coding	ENST00000649996	ENST00000264485	8671	GO:0005452	BP	solute carrier family 4 member 4 [Source:HGNC Symbol;Acc:HGNC:11030]
ENSG00000253627	75.5277514145302	2.07791022032526	0.325414958443071	6.38541703880762	1.70930991620115e-10	4.11784154212298e-07		lncRNA	ENST00000523317	ENST00000523317	NA	NA	NA	novel transcript
ENSG00000230537	526.32471974963	2.07753320750126	0.574162448555303	3.61837179134357	0.000296462301578227	0.00741894856636482	LINC02937	lncRNA	ENST00000423380	ENST00000667274	NA	NA	NA	long intergenic non-protein coding RNA 2937 [Source:HGNC Symbol;Acc:HGNC:55942]
ENSG00000112182	2734.40593416491	2.07642882175247	0.600254572656151	3.4592469867646	0.000541687933971388	0.0107967099735191	BACH2	protein_coding	ENST00000257749	ENST00000257749	60468	GO:0000122	BP	BTB domain and CNC homolog 2 [Source:HGNC Symbol;Acc:HGNC:14078]
ENSG00000254787	37.5689465297013	2.07627941867733	0.624275056836094	3.32590481702117	0.000881320188386034	0.0146559532110068		lncRNA	ENST00000534275	ENST00000534275	NA	NA	NA	novel transcript
ENSG00000230393	69.6728252374299	2.07600081357103	0.558753097088353	3.7154171035275	0.000202868767918722	0.00581878955888551		lncRNA	ENST00000434301	ENST00000434301	NA	NA	NA	novel transcript
ENSG00000287679	40.5544855210671	2.07547846812224	0.569414485048172	3.64493444164255	0.000267459972088271	0.00697857512580744		lncRNA	ENST00000658037	ENST00000658037	NA	NA	NA	novel transcript, antisense to KHDRBS2
ENSG00000175147	23.6720793040443	2.07288205588972	0.614222848666435	3.3748045361553	0.000738681362018677	0.0130201502275771	TMEM51-AS1	lncRNA	ENST00000310916	ENST00000310916	200197	NA	NA	TMEM51 antisense RNA 1 [Source:HGNC Symbol;Acc:HGNC:26301]
ENSG00000175262	49.0784088306005	2.07276376528296	0.585273177971177	3.54153213114617	0.000397810404289635	0.00886815346663187	C1orf127	protein_coding	ENST00000476357	ENST00000377004	148345	NA	NA	chromosome 1 open reading frame 127 [Source:HGNC Symbol;Acc:HGNC:26730]
ENSG00000142920	107.536508697296	2.07240059090285	0.579966097657091	3.57331333551185	0.000352492546258448	0.00825977846810692	AZIN2	protein_coding	ENST00000478635	ENST00000294517	113451	GO:0005515	BP	antizyme inhibitor 2 [Source:HGNC Symbol;Acc:HGNC:29957]
ENSG00000180438	8.59838810561738	2.06920620231623	0.721211032204312	2.86907175558852	0.00411678392137662	0.0386199646372964	TPRXL	transcribed_processed_pseudogene	ENST00000532880	ENST00000636198	348825	NA	NA	tetrapeptide repeat homeobox like (pseudogene) [Source:HGNC Symbol;Acc:HGNC:32178]
ENSG00000169508	3544.34599382554	2.06896937439305	0.642750372494173	3.21893142801999	0.0012866925072092	0.0188483575473661	GPR183	protein_coding	ENST00000376414	ENST00000376414	1880	GO:0002250	BP	G protein-coupled receptor 183 [Source:HGNC Symbol;Acc:HGNC:3128]
ENSG00000284699	12.120923893476	2.06853471531838	0.771160504074424	2.68236599824457	0.00731034323453117	0.0560030873697304		lncRNA	ENST00000641176	ENST00000641176	NA	NA	NA	novel transcript
ENSG00000235127	13.0072232665396	2.06719834364682	0.613227716062822	3.3710125773817	0.000748924385003072	0.0131310682078947		lncRNA	ENST00000416173	ENST00000416173	NA	NA	NA	novel transcript
ENSG00000236714	10.2248351598242	2.06668671145921	0.681365958974283	3.03315227923973	0.00242013441628641	0.0280301209188865	LINC01844	lncRNA	ENST00000652722	ENST00000655828	NA	NA	NA	long intergenic non-protein coding RNA 1844 [Source:HGNC Symbol;Acc:HGNC:52660]
ENSG00000196301	132.729472207873	2.06634099358071	0.555745282565248	3.71814401022488	0.000200691856848783	0.00578176195164878	HLA-DRB9	unprocessed_pseudogene	ENST00000449413	ENST00000449413	NA	NA	NA	major histocompatibility complex, class II, DR beta 9 (pseudogene) [Source:HGNC Symbol;Acc:HGNC:4957]
ENSG00000100557	55.6162865570874	2.06569837314059	0.743713230104001	2.77754689512747	0.00547709359213704	0.0464056867632975	CCDC198	protein_coding	ENST00000216445	ENST00000216445	55195	GO:0005515	MF	coiled-coil domain containing 198 [Source:HGNC Symbol;Acc:HGNC:20189]
ENSG00000108018	181.505665409837	2.0634766661619	0.801501560757166	2.57451359696987	0.0100381140956087	0.0678520933331302	SORCS1	protein_coding	ENST00000263054	ENST00000263054	114815	GO:0005515	MF	sortilin related VPS10 domain containing receptor 1 [Source:HGNC Symbol;Acc:HGNC:16697]
ENSG00000233293	122.364738142754	2.06342726292795	0.448310077838607	4.60267873717261	4.170913472309e-06	0.000409565568574342		lncRNA	ENST00000413983	ENST00000413983	NA	NA	NA	novel transcript, antisense to NOL4L
ENSG00000279983	22.5061109809403	2.06271453995421	0.647652758637916	3.18490813548347	0.00144799966219129	0.0204234644000564		protein_coding	ENST00000624396	ENST00000624396	NA	NA	NA	novel protein
ENSG00000229846	6.35651419642267	2.06226999535107	0.747701097255775	2.75814761128483	0.0058129942016199	0.0482006329668969		lncRNA	ENST00000456002	ENST00000456002	NA	NA	NA	novel transcript
ENSG00000225479	350.741446410334	2.06048215564099	0.472591050734461	4.35996862919592	1.30081091202355e-05	0.000882187288795178	PLCB1-IT1	lncRNA	ENST00000441231	ENST00000451443	100874337	NA	NA	PLCB1 intronic transcript 1 [Source:HGNC Symbol;Acc:HGNC:41414]
ENSG00000254877	8.37250677020545	2.0591810767616	0.776950732098449	2.65033674812302	0.00804115781297812	0.0593495258843499		processed_pseudogene	ENST00000525517	ENST00000525517	NA	NA	NA	cAMP-dependent protein kinase type II-alpha regulatory subunit (PRKAR2A) pseudogene
ENSG00000114013	4391.20443299071	2.05834559043687	0.705724001620349	2.91664388020088	0.003538194925492	0.0350771500212837	CD86	protein_coding	ENST00000330540	ENST00000330540	942	GO:0001618	MF	CD86 molecule [Source:HGNC Symbol;Acc:HGNC:1705]
ENSG00000226410	8.94906345815854	2.05797085893152	0.674293146358911	3.05204178634216	0.00227290457354543	0.0268441428380168		processed_pseudogene	ENST00000448028	ENST00000448028	NA	NA	NA	ribosomal protein L29 (RPL29) pseudogene
ENSG00000153802	92.0255584517383	2.05725063376213	0.589448728064512	3.49012651281347	0.000482791932730935	0.0100496366826988	TMPRSS11D	protein_coding	ENST00000283916	ENST00000283916	9407	GO:0004252	MF	transmembrane serine protease 11D [Source:HGNC Symbol;Acc:HGNC:24059]
ENSG00000001617	63.5792996170296	2.05636345263777	0.813902147496722	2.52654874908786	0.0115189400750253	0.0741711365914319	SEMA3F	protein_coding	ENST00000414301	ENST00000002829	6405	GO:0001755	BP	semaphorin 3F [Source:HGNC Symbol;Acc:HGNC:10728]
ENSG00000225078	11.3370101016287	2.05606168671122	0.567288843150145	3.6243647509335	0.000289672556779115	0.00735601371171476		processed_pseudogene	ENST00000422282	ENST00000422282	NA	NA	NA	COP9 constitutive photomorphogenic homolog subunit 2 (Arabidopsis) (COPS2) pseudogene
ENSG00000263417	21.5822161541609	2.05473102842726	0.737548776174976	2.78589171970884	0.00533806997031363	0.0456559754904742	GTSCR1	lncRNA	ENST00000582578	ENST00000582578	220158	GO:0016020	CC	Gilles de la Tourette syndrome chromosome region, candidate 1 [Source:HGNC Symbol;Acc:HGNC:18406]
ENSG00000206190	2317.95133457183	2.05456290165801	0.507132245672075	4.05133556225596	5.09261102169469e-05	0.00230838194641907	ATP10A	protein_coding	ENST00000555815	ENST00000555815	57194	GO:0000287	MF	ATPase phospholipid transporting 10A (putative) [Source:HGNC Symbol;Acc:HGNC:13542]
ENSG00000278200	7.0327883860649	2.05438551943336	0.829794196510851	2.47577716025457	0.0132946527914273	0.081068848807305	LINC01971	lncRNA	ENST00000617888	ENST00000617888	NA	NA	NA	long intergenic non-protein coding RNA 1971 [Source:HGNC Symbol;Acc:HGNC:52797]
ENSG00000254303	15.478721165834	2.05379982370317	0.646088558134163	3.17882091834953	0.00147875421678799	0.0206556870420761		lncRNA	ENST00000523792	ENST00000523792	NA	NA	NA	novel transcript
ENSG00000254649	303.284028699581	2.052882839549	0.557727288649653	3.68080042222671	0.000232502940972389	0.00633136870759475		lncRNA	ENST00000527030	ENST00000527030	NA	NA	NA	novel transcript
ENSG00000174145	13.0503261719918	2.05262699307937	0.635854181453482	3.22814106276273	0.00124597515511413	0.0184602534666683	NWD2	protein_coding	ENST00000309447	ENST00000309447	57495	NA	NA	NACHT and WD repeat domain containing 2 [Source:HGNC Symbol;Acc:HGNC:29229]
ENSG00000227827	110.593257265238	2.05036255509136	0.612049434168188	3.34999501776834	0.000808130139318932	0.0138540816131699	PKD1P2	unprocessed_pseudogene	ENST00000532739	ENST00000532739	NA	NA	NA	polycystin 1, transient receptor potential channel interacting pseudogene 2 [Source:HGNC Symbol;Acc:HGNC:30066]
ENSG00000255410	94.3493382462478	2.0500643982611	0.668114269044699	3.06843378931628	0.00215184006771534	0.0259369221771052		lncRNA	ENST00000656961	ENST00000656961	NA	NA	NA	novel transcript
ENSG00000273320	192.316829954882	2.05003620932771	0.713875513148784	2.8716998574238	0.00408270529073148	0.0383699969794207		lncRNA	ENST00000609281	ENST00000609281	NA	NA	NA	novel transcript, antisense to NAMPT
ENSG00000271642	4.78876786217467	2.04847323281512	0.77279814654493	2.65072223836658	0.00803198658425097	0.0593167912358914	MARK3P1	processed_pseudogene	ENST00000604796	ENST00000604796	NA	NA	NA	microtubule affinity regulating kinase 3 pseudogene 1 [Source:HGNC Symbol;Acc:HGNC:50312]
ENSG00000226320	104.626256867948	2.04752541250176	0.517943919637658	3.95317974566468	7.7119460068527e-05	0.00302582932577231	LINC01811	lncRNA	ENST00000424786	ENST00000659779	NA	NA	NA	long intergenic non-protein coding RNA 1811 [Source:HGNC Symbol;Acc:HGNC:52615]
ENSG00000287315	80.2379637743099	2.04716249409672	0.653215944423551	3.13397508369655	0.00172455498988882	0.0226612796780444		lncRNA	ENST00000653257	ENST00000653257	NA	NA	NA	novel transcript, antisense to OBSCN
ENSG00000240766	3.80519206125956	2.04647715401143	0.835125676653483	2.45050201571107	0.0142657163877606	0.0848160502589004	PLCXD2-AS1	lncRNA	ENST00000493131	ENST00000493131	NA	NA	NA	PLCXD2 antisense RNA 1 [Source:HGNC Symbol;Acc:HGNC:41145]
ENSG00000271026	22.6117807981211	2.04603078313247	0.448281536284436	4.56416474363614	5.01486883883646e-06	0.000477683365002727	KATNBL1P1	processed_pseudogene	ENST00000605192	ENST00000605192	NA	NA	NA	katanin regulatory subunit B1 like 1 pseudogene 1 [Source:HGNC Symbol;Acc:HGNC:39724]
ENSG00000286266	23.0133445408503	2.04545167665015	0.840717627389823	2.43298297788839	0.0149750048741436	0.0874635164267098		lncRNA	ENST00000652749	ENST00000650971	NA	NA	NA	novel transcript
ENSG00000227517	32.9286684528609	2.04516642176736	0.572919806628353	3.56972546263187	0.000357355540450537	0.0083151318800519	LINC01483	lncRNA	ENST00000588501	ENST00000591334	NA	NA	NA	long intergenic non-protein coding RNA 1483 [Source:HGNC Symbol;Acc:HGNC:51130]
ENSG00000149571	649.479210259105	2.04461231571955	0.661927648242757	3.08887583280054	0.00200915390557359	0.0249283009355363	KIRREL3	protein_coding	ENST00000525144	ENST00000525144	84623	GO:0001764	BP	kirre like nephrin family adhesion molecule 3 [Source:HGNC Symbol;Acc:HGNC:23204]
ENSG00000287291	132.587609313278	2.04353980095584	0.466164815669045	4.38372809844718	1.16665371755702e-05	0.000820198419020242		lncRNA	ENST00000654007	ENST00000654007	NA	NA	NA	novel transcript
ENSG00000167081	11541.0401616811	2.04171565582101	0.674360760230343	3.0276311675128	0.00246478719601001	0.0283203656963491	PBX3	protein_coding	ENST00000342287	ENST00000373489	5090	GO:0000785	CC	PBX homeobox 3 [Source:HGNC Symbol;Acc:HGNC:8634]
ENSG00000278745	45.9501749554236	2.04058378002286	0.830409274574111	2.45732296411237	0.0139976783423289	0.0838283235960223		processed_pseudogene	ENST00000612158	ENST00000612158	NA	NA	NA	triggering receptor expressed on myeloid cells 1 (TREM1) pseudogene
ENSG00000163520	118.32820389546	2.0402134293422	0.746533551265554	2.73291592304666	0.00627763548570925	0.0508515211637726	FBLN2	protein_coding	ENST00000404922	ENST00000404922	2199	GO:0005201	MF	fibulin 2 [Source:HGNC Symbol;Acc:HGNC:3601]
ENSG00000237065	30.5046533609762	2.03968620365086	0.704765744332244	2.89413357566553	0.00380206382289545	0.0367749941927596	NANOGP4	transcribed_processed_pseudogene	ENST00000427230	ENST00000427230	NA	NA	NA	Nanog homeobox pseudogene 4 [Source:HGNC Symbol;Acc:HGNC:23102]
ENSG00000107317	284.888733192666	2.03935209724031	0.795450750468434	2.56376915357657	0.0103542385216251	0.0691226239086358	PTGDS	protein_coding	ENST00000640716	ENST00000371625	5730	GO:0001516	BP	prostaglandin D2 synthase [Source:HGNC Symbol;Acc:HGNC:9592]
ENSG00000233607	33.4326444020139	2.03907215720024	0.623096251262839	3.27248342943425	0.00106607121462235	0.016519532337733	LINC01392	lncRNA	ENST00000419883	ENST00000419883	104355291	NA	NA	long intergenic non-protein coding RNA 1392 [Source:HGNC Symbol;Acc:HGNC:50668]
ENSG00000138378	1717.80180952105	2.03899498079601	0.542373719071266	3.75939118932142	0.000170327336304745	0.00516788297624538	STAT4	protein_coding	ENST00000392320	ENST00000392320	6775	GO:0000785	CC	signal transducer and activator of transcription 4 [Source:HGNC Symbol;Acc:HGNC:11365]
ENSG00000185477	1957.45625910588	2.03674819185469	0.550887533018287	3.69721235239332	0.000217979994919626	0.00606850931927242	GPRIN3	protein_coding	ENST00000609438	ENST00000609438	285513	GO:0005886	CC	GPRIN family member 3 [Source:HGNC Symbol;Acc:HGNC:27733]
ENSG00000258077	25.2493648029685	2.03648061018214	0.693322614122592	2.93727706077975	0.00331108143747583	0.0336896288391872		lncRNA	ENST00000552856	ENST00000552856	NA	NA	NA	novel transcript
ENSG00000285366	34.8925686055704	2.0354923337608	0.659597113944854	3.0859630685573	0.00202894021098226	0.025048781504631		TEC	ENST00000644562	ENST00000644562	NA	NA	NA	TEC
ENSG00000201542	3.22422802555036	2.03518011749059	0.807888459500275	2.51913502855266	0.0117643532022594	0.0750221071627458	SNORA62	snoRNA	ENST00000364672	ENST00000364672	124900419	NA	NA	Small nucleolar RNA SNORA62/SNORA6 family [Source:RFAM;Acc:RF00091]
ENSG00000181291	16.7658496175818	2.03503643540198	0.827925162976635	2.45799563342829	0.0139714872863237	0.0837634303950978	TMEM132E	protein_coding	ENST00000321639	ENST00000631683	124842	GO:0003674	MF	transmembrane protein 132E [Source:HGNC Symbol;Acc:HGNC:26991]
ENSG00000101445	2582.78347942563	2.03502753828895	0.460030126544456	4.42368319130572	9.70322802509739e-06	0.000742321001749424	PPP1R16B	protein_coding	ENST00000299824	ENST00000299824	26051	GO:0001938	BP	protein phosphatase 1 regulatory subunit 16B [Source:HGNC Symbol;Acc:HGNC:15850]
ENSG00000229433	21.3312655136609	2.03481331225823	0.629562897742254	3.23210487713856	0.00122881946867308	0.0182810293618651	LINC02069	lncRNA	ENST00000657359	ENST00000657359	101928992	NA	NA	long intergenic non-protein coding RNA 2069 [Source:HGNC Symbol;Acc:HGNC:52915]
ENSG00000286752	34.5566927010241	2.0316965270661	0.82267046708494	2.46963590933954	0.0135250630869054	0.0819761287669261		lncRNA	ENST00000671460	ENST00000671460	NA	NA	NA	novel transcript, antisense to SSPN
ENSG00000253522	214.508764173471	2.03107416048834	0.567886414769649	3.57655000659279	0.000348158739999589	0.00818546794315233	MIR3142HG	lncRNA	ENST00000642173	ENST00000642173	107075116	GO:0016442	CC	MIR3142 host gene [Source:HGNC Symbol;Acc:HGNC:51944]
ENSG00000182621	21972.7752685997	2.03064534949226	0.453781688239415	4.47493894557704	7.64331504335605e-06	0.000637507510650131	PLCB1	protein_coding	ENST00000637919	ENST00000338037	23236	GO:0000086	BP	phospholipase C beta 1 [Source:HGNC Symbol;Acc:HGNC:15917]
ENSG00000186187	3461.98443440236	2.02970931445029	0.351307780082221	5.77758145286522	7.57820379147313e-09	5.26626869632064e-06	ZNRF1	protein_coding	ENST00000335325	ENST00000335325	84937	GO:0004842	BP	zinc and ring finger 1 [Source:HGNC Symbol;Acc:HGNC:18452]
ENSG00000240086	116.702027394066	2.02915739471241	0.729796687018668	2.78044204749933	0.0054284947901144	0.0461671187892619		lncRNA	ENST00000649588	ENST00000649588	NA	NA	NA	novel transcript, antisense to EPHB1
ENSG00000291190	46.9746818147643	2.02620663748651	0.79016774573351	2.56427403981871	0.0103391876113434	0.0690956132739517	A2MP1	lncRNA	ENST00000543404	ENST00000543404	3	NA	NA	alpha-2-macroglobulin pseudogene 1 [Source:NCBI gene (formerly Entrezgene);Acc:3]
ENSG00000254092	11.4900084147375	2.02530379022194	0.617055078232831	3.28220909553513	0.0010299719882241	0.0161925246889668		lncRNA	ENST00000518967	ENST00000659453	NA	NA	NA	novel transcript
ENSG00000259532	17.2900867603787	2.02511793600036	0.605358714101665	3.34531888089787	0.00082188018318666	0.0140290327348291		lncRNA	ENST00000558429	ENST00000558429	NA	NA	NA	novel transcript
ENSG00000224079	11.0290134529564	2.02456328770166	0.608904871294343	3.32492542455452	0.000884421883068897	0.0146805806261749		lncRNA	ENST00000449721	ENST00000449721	NA	NA	NA	novel transcript
ENSG00000261226	142.855088518988	2.02455819391831	0.506376897237349	3.9981251217497	6.38462005856516e-05	0.00267650383336787		lncRNA	ENST00000561980	ENST00000564646	NA	NA	NA	novel transcript
ENSG00000250541	45.8756315571316	2.0214298618916	0.387013775103987	5.22314706071757	1.75907575737034e-07	4.97575404482349e-05		lncRNA	ENST00000510905	ENST00000510905	NA	NA	NA	novel transcript
ENSG00000200537	17.1217899696528	2.02087745971243	0.563074719763632	3.5890040678096	0.000331943662145644	0.00793327789371361	RNY4P6	misc_RNA	ENST00000363667	ENST00000363667	NA	NA	NA	RNY4 pseudogene 6 [Source:HGNC Symbol;Acc:HGNC:34055]
ENSG00000271615	24.8285446910924	2.02060748312512	0.471588027794553	4.28468782927925	1.82995951736102e-05	0.0011500420368584	ACTG1P22	transcribed_processed_pseudogene	ENST00000605503	ENST00000603793	NA	NA	NA	actin gamma 1 pseudogene 22 [Source:HGNC Symbol;Acc:HGNC:51502]
ENSG00000212939	159.144996254124	2.01982118016578	0.661485016895383	3.05346474761533	0.00226215298540656	0.0267665881731013		lncRNA	ENST00000391625	ENST00000391625	NA	NA	NA	novel transcript
ENSG00000266744	15.9642955956163	2.01974370822022	0.763628037439322	2.64493131367077	0.00817075007686464	0.0598658201089985		lncRNA	ENST00000581533	ENST00000581533	NA	NA	NA	novel transcript
ENSG00000110987	920.365957790552	2.01937415134853	0.362352500706896	5.57295491933693	2.5045439761264e-08	1.22620096311894e-05	BCL7A	protein_coding	ENST00000538010	ENST00000261822	605	GO:0000785	BP	BAF chromatin remodeling complex subunit BCL7A [Source:HGNC Symbol;Acc:HGNC:1004]
ENSG00000243101	8.48647007968213	2.01852124494216	0.670017649542479	3.01263891528903	0.0025898687175606	0.0291005895453264	RPS3P7	processed_pseudogene	ENST00000488662	ENST00000488662	NA	NA	NA	ribosomal protein S3 pseudogene 7 [Source:HGNC Symbol;Acc:HGNC:36056]
ENSG00000274840	139.472106882324	2.01821509179944	0.70996807039593	2.84268430645612	0.00447353573684075	0.0408118372599034	BALR6	lncRNA	ENST00000616960	ENST00000616960	NA	NA	NA	B-cell acute lymphoblastic leukemia associated long RNA 6 [Source:HGNC Symbol;Acc:HGNC:27946]
ENSG00000258455	369.534247522976	2.01809737854705	0.55937285366841	3.60778569305288	0.000308821404515924	0.00762113088433195		lncRNA	ENST00000555514	ENST00000555514	NA	NA	NA	novel transcript
ENSG00000284999	50.4216826588418	2.01792405609868	0.598277406726202	3.37289029037689	0.000743835840904335	0.0130735661220423		lncRNA	ENST00000644129	ENST00000644129	NA	NA	NA	novel transcript
ENSG00000222511	8.09089858181504	2.01773032136274	0.675633668941355	2.98642654165579	0.00282258641907417	0.0306986321107281	Y_RNA	misc_RNA	ENST00000410579	ENST00000410579	NA	NA	NA	Y RNA [Source:RFAM;Acc:RF00019]
ENSG00000252283	6.87949930762388	2.01762246613768	0.848752636895623	2.37716194145479	0.0174464267898542	0.0961189325321193	Vault	misc_RNA	ENST00000516474	ENST00000516474	NA	NA	NA	Vault RNA [Source:RFAM;Acc:RF00006]
ENSG00000211728	14.313691991746	2.01661633447414	0.699565224358296	2.88267092796666	0.00394319136907494	0.0375575301815482	TRBV5-6	TR_V_gene	ENST00000390375	ENST00000390375	NA	GO:0002250	BP	T cell receptor beta variable 5-6 [Source:HGNC Symbol;Acc:HGNC:12223]
ENSG00000290019	14.3991782491856	2.01574011717078	0.689949485745454	2.92157637452672	0.00348264876523048	0.0347624973727806		lncRNA	ENST00000702508	ENST00000702508	NA	NA	NA	novel transcript
ENSG00000227481	7.63376086577587	2.01558370629637	0.803399218657266	2.50881959988092	0.0121135330977052	0.076535139501524		lncRNA	ENST00000455149	ENST00000455149	NA	NA	NA	novel transcript
ENSG00000276494	12.0792701728546	2.01534759724958	0.494000089616469	4.07965026648934	4.51035066568239e-05	0.00215875538616025		misc_RNA	ENST00000616504	ENST00000616504	NA	NA	NA	NULL
ENSG00000266733	39.0312454632256	2.01354884889392	0.550487758742287	3.65775408611142	0.000254434984648783	0.00676546181403122	TBC1D29P	transcribed_unprocessed_pseudogene	ENST00000578471	ENST00000578471	NA	NA	NA	TBC1 domain family member 29, pseudogene [Source:HGNC Symbol;Acc:HGNC:24509]
ENSG00000228590	300.946205553432	2.01122097917875	0.823174140056826	2.44325092505932	0.0145556130474804	0.0858605342937888	MIR4432HG	lncRNA	ENST00000647917	ENST00000650395	106660609	NA	NA	MIR4432 host gene [Source:NCBI gene (formerly Entrezgene);Acc:106660609]
ENSG00000251523	106.904344603374	2.01048203472644	0.653023644195375	3.07872778052877	0.00207886541571596	0.0254047618066662		lncRNA	ENST00000505408	ENST00000505408	NA	NA	NA	novel transcript
ENSG00000145920	93.0861475760418	2.00982735933151	0.647366009696183	3.10462293235745	0.00190521736781063	0.024148001260024	CPLX2	protein_coding	ENST00000359546	ENST00000393745	10814	GO:0000149	MF	complexin 2 [Source:HGNC Symbol;Acc:HGNC:2310]
ENSG00000225460	31.1625968085664	2.00862325905713	0.404320936491045	4.96789326936479	6.7684195771274e-07	0.000119672880981729		processed_pseudogene	ENST00000430017	ENST00000430017	NA	NA	NA	ubiquitin-conjugating enzyme E2 pseudogene
ENSG00000275981	17.2274803054309	2.00820263334817	0.633635548029444	3.16933391693936	0.00152788750732116	0.0210571102076878		misc_RNA	ENST00000621460	ENST00000621460	NA	NA	NA	NULL
ENSG00000229679	13.7160796464558	2.00784487062159	0.614244784036796	3.26880247549862	0.00108003669615068	0.0166747484986978		lncRNA	ENST00000440788	ENST00000440788	NA	NA	NA	novel transcript
ENSG00000061918	568.934121661204	2.00718432487417	0.534479352305831	3.75540105752421	0.000173064121859866	0.00521153758960677	GUCY1B1	protein_coding	ENST00000505154	ENST00000264424	2983	GO:0004016	MF	guanylate cyclase 1 soluble subunit beta 1 [Source:HGNC Symbol;Acc:HGNC:4687]
ENSG00000279652	13.4412909569974	2.0067927208657	0.800540406949575	2.50679753756903	0.0121830472843278	0.0768721139630645		lncRNA	ENST00000625157	ENST00000625157	NA	NA	NA	novel transcript
ENSG00000168676	45.6098143275033	2.006488450431	0.48830455527063	4.10909222282179	3.97217437827514e-05	0.00197711423324174	KCTD19	protein_coding	ENST00000570049	ENST00000304372	146212	GO:0005515	BP	potassium channel tetramerization domain containing 19 [Source:HGNC Symbol;Acc:HGNC:24753]
ENSG00000144655	3833.6711870667	2.00374859572278	0.552734543171586	3.62515536703259	0.000288787781214374	0.00735421794359591	CSRNP1	protein_coding	ENST00000273153	ENST00000273153	64651	GO:0000785	CC	cysteine and serine rich nuclear protein 1 [Source:HGNC Symbol;Acc:HGNC:14300]
ENSG00000263961	5556.1627258981	2.00272718826059	0.814778237309565	2.45800279947791	0.0139712085020151	0.0837634303950978	RHEX	protein_coding	ENST00000331555	ENST00000331555	440712	GO:0005128	BP	regulator of hemoglobinization and erythroid cell expansion [Source:HGNC Symbol;Acc:HGNC:25341]
ENSG00000286481	85.7004578200769	2.00209088569386	0.71100234693425	2.815870994416	0.00486451957281506	0.0429099954649213		lncRNA	ENST00000657880	ENST00000657880	NA	NA	NA	novel transcript
ENSG00000198626	56.2286223759039	2.00157352965212	0.764219906408498	2.61910676870307	0.00881603496494262	0.062674845463932	RYR2	protein_coding	ENST00000366574	ENST00000366574	6262	GO:0001666	BP	ryanodine receptor 2 [Source:HGNC Symbol;Acc:HGNC:10484]
ENSG00000250698	437.49146926707	2.00030599934835	0.517201453808844	3.86755679942008	0.000109931228277449	0.00381235591653927		lncRNA	ENST00000509184	ENST00000509184	NA	NA	NA	novel transcript
ENSG00000289566	54.3524913833741	2.00012280547613	0.448493038270221	4.45965184474288	8.20928958632268e-06	0.000671006047234499		lncRNA	ENST00000689865	ENST00000689865	105373273	NA	NA	novel transcript
ENSG00000279485	6.67328557712489	1.99714297218527	0.677259004145837	2.9488614547164	0.00318946923903933	0.0329581528229698		TEC	ENST00000624325	ENST00000624325	NA	NA	NA	TEC
ENSG00000253307	23.5140681267814	1.9968345174919	0.389940141849131	5.1208744706886	3.04122049346817e-07	7.32117799700235e-05		lncRNA	ENST00000517658	ENST00000517658	NA	NA	NA	novel transcript
ENSG00000290887	5.628416326309	1.99667020309011	0.762922343992911	2.61713425856703	0.00886714568575793	0.0628698712995018		lncRNA	ENST00000419779	ENST00000423162	NA	NA	NA	novel transcript
ENSG00000134508	1507.53503343987	1.99640191490615	0.714145371324673	2.79551194346188	0.00518175871135058	0.0447583604851046	CABLES1	protein_coding	ENST00000400473	ENST00000256925	91768	GO:0005515	MF	Cdk5 and Abl enzyme substrate 1 [Source:HGNC Symbol;Acc:HGNC:25097]
ENSG00000265801	16.6910270332844	1.99572502336924	0.450519926240172	4.42982631206708	9.43090130820561e-06	0.00072868769955703		lncRNA	ENST00000583643	ENST00000583643	NA	NA	NA	novel transcript
ENSG00000106624	516.769006091724	1.99471980258635	0.679903840772527	2.93382634861996	0.00334811469767163	0.0339246706988822	AEBP1	protein_coding	ENST00000223357	ENST00000223357	165	GO:0000122	BP	AE binding protein 1 [Source:HGNC Symbol;Acc:HGNC:303]
ENSG00000229299	94.2924339708809	1.99451361402048	0.554552033839857	3.59662122273714	0.000322377383306646	0.00779747598605687	ZBTB46-AS2	lncRNA	ENST00000447343	ENST00000447343	NA	NA	NA	ZBTB46 antisense RNA 2 [Source:HGNC Symbol;Acc:HGNC:40752]
ENSG00000218416	6.80896762737501	1.99448052343461	0.628802099787649	3.17187319207134	0.00151459126360816	0.0209475460942909	GPC1-AS1	lncRNA	ENST00000471662	ENST00000404327	100130449	NA	NA	GPC1 antisense RNA 1 [Source:HGNC Symbol;Acc:HGNC:56102]
ENSG00000271483	18.7786484411589	1.99422943672244	0.687144120486086	2.90219966564179	0.00370552280672675	0.0361536594282467		processed_pseudogene	ENST00000605225	ENST00000605225	NA	NA	NA	UBC ubiquitin C, pseudogene
ENSG00000105835	33882.3417014992	1.99381590973228	0.615391197963287	3.23991619693467	0.00119564834108964	0.0179426696235944	NAMPT	protein_coding	ENST00000681550	ENST00000222553	10135	GO:0005125	MF	nicotinamide phosphoribosyltransferase [Source:HGNC Symbol;Acc:HGNC:30092]
ENSG00000262075	12.7406520509226	1.99369872190621	0.683038431291411	2.918867563772	0.00351305439423661	0.0349141181491018	DKFZP434A062	lncRNA	ENST00000601276	ENST00000573103	26102	NA	NA	uncharacterized LOC26102 [Source:NCBI gene (formerly Entrezgene);Acc:26102]
ENSG00000229105	69.129039602412	1.99270425392708	0.605798397436667	3.28938515248452	0.00100406523604067	0.0159584814435958	ASTN2-AS1	lncRNA	ENST00000418250	ENST00000418250	100128505	NA	NA	ASTN2 antisense RNA 1 [Source:HGNC Symbol;Acc:HGNC:51175]
ENSG00000200882	5.40140506847596	1.99232394183382	0.64421233291555	3.09265104071672	0.00198377254287526	0.0247533165087501	RNU6-681P	snRNA	ENST00000364012	ENST00000364012	NA	NA	NA	RNA, U6 small nuclear 681, pseudogene [Source:HGNC Symbol;Acc:HGNC:47644]
ENSG00000215452	26.747552093021	1.99227309404006	0.842780314943227	2.36392931670962	0.0180822621685757	0.0983178792843289	ZNF663P	transcribed_unitary_pseudogene	ENST00000400371	ENST00000641770	NA	NA	NA	zinc finger protein 663, pseudogene [Source:HGNC Symbol;Acc:HGNC:25342]
ENSG00000125538	1526.74347012655	1.99143098776143	0.426406020032489	4.67026940100353	3.00804984157058e-06	0.000335490398379613	IL1B	protein_coding	ENST00000263341	ENST00000263341	3553	GO:0001660	BP	interleukin 1 beta [Source:HGNC Symbol;Acc:HGNC:5992]
ENSG00000226291	4.47230834584629	1.99111062931386	0.728280362142258	2.73398917891587	0.00625721007580179	0.050745032032022		lncRNA	ENST00000415656	ENST00000415656	NA	NA	NA	novel transcript
ENSG00000165091	35.0686151165923	1.99066513714913	0.729143928242257	2.73014018226555	0.00633073994527941	0.0511212555670652	TMC1	protein_coding	ENST00000643676	ENST00000297784	117531	GO:0005245	BP	transmembrane channel like 1 [Source:HGNC Symbol;Acc:HGNC:16513]
ENSG00000259345	359.236964080327	1.9896125062282	0.744832807084314	2.67122028904264	0.00755760305037929	0.057115344680784		lncRNA	ENST00000560197	ENST00000560484	NA	NA	NA	novel transcript
ENSG00000163462	187.617038284906	1.9879335870605	0.713347831661847	2.78676614524687	0.00532368819868418	0.0455545339208268	TRIM46	protein_coding	ENST00000545012	ENST00000334634	80128	GO:0001578	BP	tripartite motif containing 46 [Source:HGNC Symbol;Acc:HGNC:19019]
ENSG00000276298	4.17108193648965	1.98775300067568	0.833782737715038	2.38401793508351	0.0171247677532297	0.0951574151378652		unprocessed_pseudogene	ENST00000617723	ENST00000617723	NA	NA	NA	HYDIN, axonemal central pair apparatus protein (HYDIN) pseudogene
ENSG00000225064	7.75192037972523	1.98754311432164	0.661725431540555	3.00357673981861	0.00266826247701369	0.0296222220796826	LINC01802	lncRNA	ENST00000438824	ENST00000438824	NA	NA	NA	long intergenic non-protein coding RNA 1802 [Source:HGNC Symbol;Acc:HGNC:52591]
ENSG00000151150	2423.11713500177	1.98640898778189	0.637542563896078	3.11572763964617	0.00183491662021854	0.0235582538627454	ANK3	protein_coding	ENST00000280772	ENST00000280772	288	GO:0000281	BP	ankyrin 3 [Source:HGNC Symbol;Acc:HGNC:494]
ENSG00000088053	359.784780063637	1.98552144087164	0.75137307328001	2.64252408221675	0.00822906130195089	0.0601467150500197	GP6	protein_coding	ENST00000310373	ENST00000310373	51206	GO:0004888	BP	glycoprotein VI platelet [Source:HGNC Symbol;Acc:HGNC:14388]
ENSG00000130656	6.13307371584221	1.98495411819734	0.729034556121308	2.72271609285288	0.00647476734328109	0.0518381856643029	HBZ	protein_coding	ENST00000652335	ENST00000252951	3050	GO:0004601	MF	hemoglobin subunit zeta [Source:HGNC Symbol;Acc:HGNC:4835]
ENSG00000256937	18.1979210867066	1.98443401518855	0.774130236264049	2.56343690276901	0.0103641537179062	0.0691249647010442	KRT17P8	processed_pseudogene	ENST00000540749	ENST00000540749	NA	NA	NA	keratin 17 pseudogene 8 [Source:HGNC Symbol;Acc:HGNC:50726]
ENSG00000211578	4.41673415983115	1.98422417224301	0.791581612891114	2.50665773424925	0.0121878664629708	0.0768890961078758	MIR766	miRNA	ENST00000390223	ENST00000390223	768218	GO:0005615	BP	microRNA 766 [Source:HGNC Symbol;Acc:HGNC:33139]
ENSG00000225546	10.5398150091417	1.98404125191273	0.767236304039725	2.58595851299811	0.00971086181607488	0.0663725558134447	LINC02476	lncRNA	ENST00000431071	ENST00000660268	105375475	NA	NA	long intergenic non-protein coding RNA 2476 [Source:HGNC Symbol;Acc:HGNC:53419]
ENSG00000254987	42.5483605005753	1.98400046651923	0.574632925153857	3.45263972820216	0.000555129883977284	0.0109558566288384		lncRNA	ENST00000533459	ENST00000533459	NA	NA	NA	novel transcript
ENSG00000285560	12.4416894095954	1.98272369761259	0.621683297587537	3.18928255802692	0.00142626393384506	0.0202115582405589		lncRNA	ENST00000648196	ENST00000648196	NA	NA	NA	novel transcript, antisense to CRTC3
ENSG00000108309	96.2690209943839	1.9816475281819	0.790653689077847	2.50634070966408	0.0121988009180618	0.0768973006158906	RUNDC3A	protein_coding	ENST00000590834	ENST00000426726	10900	GO:0005515	MF	RUN domain containing 3A [Source:HGNC Symbol;Acc:HGNC:16984]
ENSG00000114654	261.052428959832	1.98124912880619	0.611858854725383	3.23808197512386	0.0012033622729571	0.018039270319598	EFCC1	protein_coding	ENST00000436022	ENST00000683648	79825	GO:0005509	MF	EF-hand and coiled-coil domain containing 1 [Source:HGNC Symbol;Acc:HGNC:25692]
ENSG00000288080	190.070242101575	1.98095093602941	0.525285654630133	3.77118795948129	0.000162472233787125	0.00499242911575813		lncRNA	ENST00000657185	ENST00000657185	105373973	NA	NA	novel transcript, antisense to FARP2
ENSG00000145721	77.51730529626	1.98044561457169	0.734210892280491	2.69737977928976	0.00698875147094635	0.0544866285122152	LIX1	protein_coding	ENST00000274382	ENST00000274382	167410	GO:0005515	MF	limb and CNS expressed 1 [Source:HGNC Symbol;Acc:HGNC:18581]
ENSG00000183783	3.01262677792039	1.98018386818212	0.824538881013753	2.40156518240538	0.016325100332304	0.0921900024391525	KCTD8	protein_coding	ENST00000360029	ENST00000360029	386617	GO:0005515	MF	potassium channel tetramerization domain containing 8 [Source:HGNC Symbol;Acc:HGNC:22394]
ENSG00000242607	36.0249190536642	1.979257703825	0.672744528256383	2.94206436573306	0.00326032152669251	0.0333434436403795	RPS3AP34	processed_pseudogene	ENST00000483613	ENST00000483613	NA	NA	NA	RPS3A pseudogene 34 [Source:HGNC Symbol;Acc:HGNC:36293]
ENSG00000109265	1449.57130525677	1.97772352972298	0.770173464635536	2.567893624664	0.0102318549287981	0.0686914807495194	CRACD	protein_coding	ENST00000629263	ENST00000682029	57482	GO:0005515	BP	capping protein inhibiting regulator of actin dynamics [Source:HGNC Symbol;Acc:HGNC:29219]
ENSG00000256287	6.71982571159487	1.97759558577966	0.834493376655586	2.36981579614844	0.0177969494542164	0.0972347392618027	LINC02398	lncRNA	ENST00000536666	ENST00000536666	NA	NA	NA	long intergenic non-protein coding RNA 2398 [Source:HGNC Symbol;Acc:HGNC:53325]
ENSG00000283044	5.38139178061654	1.97694109470642	0.802419289177197	2.46372578696804	0.013750126153751	0.0829529423109477		lncRNA	ENST00000635698	ENST00000635698	NA	NA	NA	novel transcript
ENSG00000232487	28.1082708780127	1.97667875927822	0.573506161440676	3.44665653514986	0.000567569652123815	0.0110790966098115	RASA3-IT1	lncRNA	ENST00000454005	ENST00000454005	NA	NA	NA	RASA3 intronic transcript 1 [Source:HGNC Symbol;Acc:HGNC:39938]
ENSG00000288067	145.886206764301	1.97653688402212	0.331738652927218	5.95811451750171	2.55164695009324e-09	2.79975634081015e-06		lncRNA	ENST00000661266	ENST00000661266	NA	NA	NA	novel transcript
ENSG00000272963	6.69104616866754	1.97630065990027	0.579431429799437	3.41075847505259	0.00064782448972587	0.0120918314879825	OR7A19P	unprocessed_pseudogene	ENST00000608051	ENST00000608051	NA	NA	NA	olfactory receptor family 7 subfamily A member 19 pseudogene [Source:HGNC Symbol;Acc:HGNC:15337]
ENSG00000006704	124.273086801188	1.97623741811654	0.557407530867293	3.54540853626722	0.00039200500516716	0.00881486799422558	GTF2IRD1	protein_coding	ENST00000265755	ENST00000424337	9569	GO:0000122	BP	GTF2I repeat domain containing 1 [Source:HGNC Symbol;Acc:HGNC:4661]
ENSG00000145819	23679.0149336236	1.97577767498667	0.51471707901992	3.83857026611353	0.000123752801627594	0.00412857435225478	ARHGAP26	protein_coding	ENST00000645722	ENST00000645722	23092	GO:0005096	MF	Rho GTPase activating protein 26 [Source:HGNC Symbol;Acc:HGNC:17073]
ENSG00000154269	228.595370974337	1.97565271068146	0.757405122398927	2.6084491010887	0.00909535370773918	0.0637848752195241	ENPP3	protein_coding	ENST00000427707	ENST00000357639	5169	GO:0002276	BP	ectonucleotide pyrophosphatase/phosphodiesterase 3 [Source:HGNC Symbol;Acc:HGNC:3358]
ENSG00000231873	30.5486465383867	1.9747846746486	0.652358979799267	3.02714415804661	0.00246876191582299	0.0283246747948459		lncRNA	ENST00000665970	ENST00000412811	105377043	NA	NA	novel transcript
ENSG00000169181	38.2582773248198	1.9747616833677	0.484375047057747	4.07692695022802	4.56348218349162e-05	0.00217245832641601	GSG1L	protein_coding	ENST00000447459	ENST00000447459	146395	GO:0005515	BP	GSG1 like [Source:HGNC Symbol;Acc:HGNC:28283]
ENSG00000232520	15.7967303221531	1.97346870649642	0.746895272162699	2.64222947988688	0.00823622307480076	0.0601627403685253	GCSIR	lncRNA	ENST00000447074	ENST00000663229	151484	NA	NA	GPR55 cis regulatory suppressor of immune response RNA [Source:HGNC Symbol;Acc:HGNC:54400]
ENSG00000226948	10.287248826016	1.97304598596917	0.749843944689765	2.63127548064082	0.00850650524342524	0.0612950512203603	RPS4XP2	transcribed_processed_pseudogene	ENST00000652447	ENST00000458402	NA	NA	NA	ribosomal protein S4X pseudogene 2 [Source:HGNC Symbol;Acc:HGNC:16563]
ENSG00000284669	1309.51973959147	1.97243627995983	0.54029274913652	3.65068064139696	0.000261546284162092	0.00690375202664818		lncRNA	ENST00000641308	ENST00000641308	NA	NA	NA	novel transcript, antisense CSRNP1
ENSG00000290075	10.7873648667055	1.97201094891132	0.670293800579209	2.94200982794005	0.00326089577775905	0.0333434436403795		lncRNA	ENST00000702787	ENST00000702787	124902611	NA	NA	novel transcript
ENSG00000220643	5.0943026471807	1.97188463614379	0.62018286990986	3.17952128608518	0.00147518534357759	0.0206297591236531		processed_pseudogene	ENST00000404133	ENST00000404133	NA	NA	NA	ribosomal protein L44 (RPL44) pseudogene
ENSG00000289465	67.1575866498089	1.96980909032982	0.688170414741966	2.86238560701337	0.00420465009765617	0.0392607844777528		lncRNA	ENST00000692099	ENST00000692099	NA	NA	NA	novel transcript
ENSG00000231612	7.24410137159138	1.96953301831953	0.634299029363808	3.10505444142796	0.00190244005009972	0.0241223708615779		lncRNA	ENST00000414565	ENST00000414565	NA	NA	NA	novel transcript
ENSG00000259577	187.460039442872	1.96869327526761	0.419116766338388	4.69724294846777	2.63696729166259e-06	0.000301900813924529	CERNA1	lncRNA	ENST00000559779	ENST00000654724	NA	NA	NA	competing endogenous lncRNA 1 for miR-4707-5p and miR-4767 [Source:HGNC Symbol;Acc:HGNC:52664]
ENSG00000289485	437.328637607052	1.96819547216242	0.691365692060564	2.84682259297009	0.00441579634109135	0.0405409594973773		lncRNA	ENST00000689280	ENST00000693235	101927369	NA	NA	novel transcript
ENSG00000205018	468.67645798692	1.96779148197708	0.437980016603615	4.49287960039052	7.02665148709258e-06	0.000607452340042052		lncRNA	ENST00000378347	ENST00000378347	NA	NA	NA	novel transcript, antisense to CBFA2T3
ENSG00000279476	153.333304480348	1.96653602672586	0.466358275065502	4.21679239303656	2.47801916658858e-05	0.00142136032704516		TEC	ENST00000624318	ENST00000624318	NA	NA	NA	novel transcript
ENSG00000250447	3.0066341871983	1.96607087475778	0.83039452392621	2.36763468220135	0.0179022028716949	0.0976768840361719	LINC02105	lncRNA	ENST00000673580	ENST00000673580	105378966	NA	NA	long intergenic non-protein coding RNA 2105 [Source:HGNC Symbol;Acc:HGNC:52960]
ENSG00000198879	6241.0808542928	1.96606690154001	0.445611398706186	4.41206600021543	1.0238888946808e-05	0.000764051481922616	SFMBT2	protein_coding	ENST00000361972	ENST00000397167	57713	GO:0003682	MF	Scm like with four mbt domains 2 [Source:HGNC Symbol;Acc:HGNC:20256]
ENSG00000237980	18.6202717351095	1.96585362015048	0.706286853737759	2.78336430834999	0.00537983605906469	0.0459479451265331	LINC02773	lncRNA	ENST00000446962	ENST00000653931	NA	NA	NA	long intergenic non-protein coding RNA 2773 [Source:HGNC Symbol;Acc:HGNC:54293]
ENSG00000285850	180.039510070603	1.96559164483692	0.399161343719407	4.92430360746217	8.46613061175972e-07	0.000138430812573099		lncRNA	ENST00000648074	ENST00000648074	NA	NA	NA	novel transcript
ENSG00000219384	4.00378419805909	1.96406989920538	0.759894514349345	2.58466124194501	0.00974747152995571	0.0665472569821424		processed_pseudogene	ENST00000405824	ENST00000405824	NA	NA	NA	pseudogene similar to part of poly(rC) binding protein 3 (PCBP3)
ENSG00000186642	451.831632238129	1.96385425178936	0.754072874339664	2.60432952651836	0.00920542026994149	0.0642252385191243	PDE2A	protein_coding	ENST00000334456	ENST00000334456	5138	GO:0000122	BP	phosphodiesterase 2A [Source:HGNC Symbol;Acc:HGNC:8777]
ENSG00000287945	30.3448233684076	1.96304951431851	0.432385354982725	4.54004626127297	5.62418869613827e-06	0.000521117135188853		lncRNA	ENST00000659071	ENST00000659071	NA	NA	NA	novel transcript, antisense to CCNY
ENSG00000251682	93.1648304557348	1.96127730994677	0.499898238685087	3.92335311103643	8.73250156761275e-05	0.00330426886541628		processed_pseudogene	ENST00000505325	ENST00000505325	NA	NA	NA	DEAD (Asp-Glu-Ala-Asp) box polypeptide 25 (DDX25) pseudogene
ENSG00000229339	18.1470308538843	1.96079554511148	0.648654253576493	3.02286701166332	0.00250392253909192	0.0285097895272803		processed_pseudogene	ENST00000434712	ENST00000434712	NA	NA	NA	ribosomal protein L7a (RPL7A) pseudogene
ENSG00000235731	146.028231027404	1.96040697806168	0.331059215265012	5.92162032551301	3.187849297037e-09	2.9537467230187e-06	LINC02250	lncRNA	ENST00000651932	ENST00000665366	NA	NA	NA	long intergenic non-protein coding RNA 2250 [Source:HGNC Symbol;Acc:HGNC:53148]
ENSG00000226994	4.12699368528444	1.96010536148434	0.830189756852647	2.36103293892151	0.018224111848635	0.0987124887147303		lncRNA	ENST00000453451	ENST00000453451	NA	NA	NA	novel transcript
ENSG00000290089	40.5756380575199	1.95884598825242	0.480884545970115	4.07342262226524	4.63272477062045e-05	0.00219154310592427		lncRNA	ENST00000702930	ENST00000702930	NA	NA	NA	novel transcript, antisense to MFSD6
ENSG00000225535	63.7428076542659	1.95748384685316	0.597842132331856	3.2742487372345	0.00105943310321597	0.0164448774131495	LINC01393	lncRNA	ENST00000435981	ENST00000660905	102724386	NA	NA	long intergenic non-protein coding RNA 1393 [Source:HGNC Symbol;Acc:HGNC:50669]
ENSG00000253088	16.2921398420241	1.95701244528871	0.556769185762828	3.51494388578171	0.000439846917596276	0.00947024442687309	Y_RNA	misc_RNA	ENST00000517279	ENST00000517279	NA	NA	NA	Y RNA [Source:RFAM;Acc:RF00019]
ENSG00000107281	507.189735316397	1.95661753769514	0.73431278406138	2.66455600415039	0.00770900289589709	0.0579856962836761	NPDC1	protein_coding	ENST00000371601	ENST00000371601	56654	GO:0005515	MF	neural proliferation, differentiation and control 1 [Source:HGNC Symbol;Acc:HGNC:7899]
ENSG00000257725	10.7714665556649	1.95648398711986	0.772255118938094	2.53346846028054	0.0112939903426862	0.0732184490533386	LINC02399	lncRNA	ENST00000547094	ENST00000547094	105369891	NA	NA	long intergenic non-protein coding RNA 2399 [Source:HGNC Symbol;Acc:HGNC:53326]
ENSG00000235300	287.507425985097	1.95567121648248	0.675193391032024	2.89646083989842	0.00377397740640692	0.0365816651174679	SKAP1-AS2	lncRNA	ENST00000421610	ENST00000421610	105371807	NA	NA	SKAP1 antisense RNA 2 [Source:HGNC Symbol;Acc:HGNC:55570]
ENSG00000251027	3.96949052711837	1.95526536424688	0.781483158252839	2.50199296504132	0.0123496378807538	0.0774902786002635	LINC01950	lncRNA	ENST00000513273	ENST00000661979	102467213	NA	NA	long intergenic non-protein coding RNA 1950 [Source:HGNC Symbol;Acc:HGNC:52773]
ENSG00000284138	22.2582599605069	1.95279213154157	0.662114737934108	2.94932587912868	0.00318467971613423	0.0329367327409	ATP6V0CP4	processed_pseudogene	ENST00000639582	ENST00000639582	NA	NA	NA	ATPase H+ transporting V0 subunit c pseudogene 4 [Source:HGNC Symbol;Acc:HGNC:40002]
ENSG00000179636	23.3029686086303	1.95232535286782	0.613948567610152	3.17994935710561	0.00147300792621891	0.0206078808374549	TPPP2	protein_coding	ENST00000533755	ENST00000321760	122664	GO:0005829	BP	tubulin polymerization promoting protein family member 2 [Source:HGNC Symbol;Acc:HGNC:19293]
ENSG00000171385	60.0626955654123	1.95177859161905	0.776549372911903	2.51339922444373	0.0119573935186931	0.075805679331841	KCND3	protein_coding	ENST00000369697	ENST00000302127	3752	GO:0005249	BP	potassium voltage-gated channel subfamily D member 3 [Source:HGNC Symbol;Acc:HGNC:6239]
ENSG00000237372	13.5848810315058	1.9517279516665	0.611936358816117	3.18942962539832	0.00142553843564935	0.0202092023972636		lncRNA	ENST00000617436	ENST00000617436	100129066	NA	NA	novel transcript
ENSG00000276680	10.3299142423446	1.95108391773338	0.479910572097388	4.06551560055537	4.79263880923403e-05	0.00222319378704084		misc_RNA	ENST00000620949	ENST00000620949	NA	NA	NA	NULL
ENSG00000175520	5.41908211515661	1.94954190391078	0.708947919682118	2.74990849085914	0.00596119096771732	0.0491251075962219	UBQLN3	protein_coding	ENST00000311659	ENST00000311659	50613	GO:0005515	MF	ubiquilin 3 [Source:HGNC Symbol;Acc:HGNC:12510]
ENSG00000157470	239.512310436388	1.94796063674436	0.811495815517945	2.40045678547468	0.016374624067949	0.0924011787562828	FAM81A	protein_coding	ENST00000558348	ENST00000288228	145773	GO:0005515	MF	family with sequence similarity 81 member A [Source:HGNC Symbol;Acc:HGNC:28379]
ENSG00000145335	2069.43068021172	1.94732300558793	0.319244618350758	6.09978334371914	1.06212328394015e-09	1.47618796109466e-06	SNCA	protein_coding	ENST00000673902	ENST00000394991	6622	GO:0000122	BP	synuclein alpha [Source:HGNC Symbol;Acc:HGNC:11138]
ENSG00000249049	18.5400764011684	1.9472748114385	0.666110990064266	2.923348872011	0.00346288281876784	0.0346679282458103		lncRNA	ENST00000502368	ENST00000502368	NA	NA	NA	novel transcript, antisense to CCSER1
ENSG00000226705	34.4288512640888	1.94537909460336	0.763208744518115	2.54894759602323	0.010804853482922	0.0709735668239141	SDCBPP1	processed_pseudogene	ENST00000440192	ENST00000440192	NA	NA	NA	syndecan binding protein pseudogene 1 [Source:HGNC Symbol;Acc:HGNC:44684]
ENSG00000259585	7.42477149957827	1.9453001895554	0.616322140583608	3.15630424653145	0.00159782098265842	0.021629447675413	RBM17P4	processed_pseudogene	ENST00000558517	ENST00000558517	NA	NA	NA	RNA binding motif protein 17 pseudogene 4 [Source:HGNC Symbol;Acc:HGNC:50369]
ENSG00000164136	1572.44866774941	1.9452383084283	0.612114407217777	3.17789989173745	0.00148345961529234	0.0206814416119615	IL15	protein_coding	ENST00000320650	ENST00000320650	3600	GO:0001779	BP	interleukin 15 [Source:HGNC Symbol;Acc:HGNC:5977]
ENSG00000245750	227.753359079407	1.94452295673659	0.593415189298279	3.27683381181397	0.00104978138770034	0.0163865659723281	DRAIC	lncRNA	ENST00000668790	ENST00000646247	145837	NA	NA	downregulated RNA in cancer, inhibitor of cell invasion and migration [Source:HGNC Symbol;Acc:HGNC:27082]
ENSG00000219438	30.9509804298104	1.9441149904553	0.674016303562126	2.88437383514433	0.00392192873969258	0.0374928087136326	TAFA5	protein_coding	ENST00000402357	ENST00000402357	25817	GO:0001664	BP	TAFA chemokine like family member 5 [Source:HGNC Symbol;Acc:HGNC:21592]
ENSG00000267065	16.4641605533591	1.94387860377159	0.822730584689879	2.36271586342486	0.0181415727438027	0.0984773730914908	LINC02080	lncRNA	ENST00000585863	ENST00000585863	101928514	NA	NA	long intergenic non-protein coding RNA 2080 [Source:HGNC Symbol;Acc:HGNC:52928]
ENSG00000236264	16.5102681355569	1.94354106116298	0.570794012526517	3.40497801047394	0.000661693817670513	0.0122393390323094	RPL26P30	transcribed_processed_pseudogene	ENST00000602923	ENST00000453533	NA	NA	NA	ribosomal protein L26 pseudogene 30 [Source:HGNC Symbol;Acc:HGNC:36733]
ENSG00000266775	5.19910884905452	1.94173108143641	0.761613879579504	2.54949539851934	0.0107878934697257	0.070942915090447		lncRNA	ENST00000582125	ENST00000582125	NA	NA	NA	novel transcript, antisense to TBC1D29
ENSG00000171094	178.15206095154	1.94125615491192	0.484514450045116	4.00660115447776	6.15987510325534e-05	0.00261259679262013	ALK	protein_coding	ENST00000642122	ENST00000389048	238	GO:0004713	MF	ALK receptor tyrosine kinase [Source:HGNC Symbol;Acc:HGNC:427]
ENSG00000159433	959.595924338628	1.94042917490228	0.426584861671211	4.54875301317621	5.39647342203391e-06	0.000505199387509371	STARD9	protein_coding	ENST00000290607	ENST00000290607	57519	GO:0003777	MF	StAR related lipid transfer domain containing 9 [Source:HGNC Symbol;Acc:HGNC:19162]
ENSG00000197635	217.869022879089	1.94041475339196	0.565109386130953	3.43369761857451	0.000595408004950332	0.0113719152573389	DPP4	protein_coding	ENST00000677015	ENST00000360534	1803	GO:0001618	CC	dipeptidyl peptidase 4 [Source:HGNC Symbol;Acc:HGNC:3009]
ENSG00000204252	1225.03693804917	1.93976380939254	0.581922957123227	3.33336876582751	0.000858011379264589	0.0144102066388399	HLA-DOA	protein_coding	ENST00000229829	ENST00000229829	3111	GO:0002250	CC	major histocompatibility complex, class II, DO alpha [Source:HGNC Symbol;Acc:HGNC:4936]
ENSG00000286220	52.5223197620924	1.93962036147832	0.660015960458836	2.9387476632079	0.00329541252854018	0.0335823539569453		transcribed_unprocessed_pseudogene	ENST00000652306	ENST00000652306	NA	NA	NA	purinergic receptor P2X, ligand-gated ion channel, 7 (P2RX7) pseudogene
ENSG00000196277	55.718326839053	1.93944470037352	0.581430989366714	3.33564040417925	0.000851031671835017	0.0143436942599954	GRM7	protein_coding	ENST00000443259	ENST00000357716	2917	GO:0001642	MF	glutamate metabotropic receptor 7 [Source:HGNC Symbol;Acc:HGNC:4599]
ENSG00000158806	52.1072011521919	1.9392744891002	0.684087765856434	2.83483287655693	0.00458496640128447	0.0414318414288604	NPM2	protein_coding	ENST00000520125	ENST00000518119	10361	GO:0000785	BP	nucleophosmin/nucleoplasmin 2 [Source:HGNC Symbol;Acc:HGNC:7930]
ENSG00000254420	8160.25884696269	1.93910715150297	0.479890156108592	4.04073125239139	5.32847929171657e-05	0.00236368454826703		lncRNA	ENST00000534168	ENST00000534168	NA	NA	NA	novel transcript
ENSG00000263676	9.41366116273187	1.93845354055409	0.727853734333012	2.6632459917657	0.00773908157814667	0.0580938551239989	MIR4632	miRNA	ENST00000584158	ENST00000584158	100616438	GO:0005615	MF	microRNA 4632 [Source:HGNC Symbol;Acc:HGNC:41593]
ENSG00000117245	57.2347494011216	1.93724458867182	0.803241313966627	2.41178404918588	0.0158746809453918	0.0906522551584509	KIF17	protein_coding	ENST00000493818	ENST00000400463	57576	GO:0001750	MF	kinesin family member 17 [Source:HGNC Symbol;Acc:HGNC:19167]
ENSG00000265474	94.5304217247043	1.93717900385742	0.49168798301338	3.93985427910021	8.15311176062883e-05	0.00315777970613166		lncRNA	ENST00000577325	ENST00000577325	NA	NA	NA	novel transcript, antisense to TRAF4
ENSG00000222421	4.68085347267358	1.93691700508605	0.736114464550602	2.63127149154519	0.00850660509934986	0.0612950512203603	Y_RNA	misc_RNA	ENST00000410489	ENST00000410489	NA	NA	NA	Y RNA [Source:RFAM;Acc:RF00019]
ENSG00000283154	1431.78693042186	1.93646932467722	0.482479176823282	4.01358114028305	5.98044313946464e-05	0.00256713205183959	IQCJ-SCHIP1	protein_coding	ENST00000639147	ENST00000638749	29970	GO:0005515	MF	IQCJ-SCHIP1 readthrough [Source:HGNC Symbol;Acc:HGNC:38842]
ENSG00000229456	78.8090182503288	1.93353915981116	0.654296914677246	2.95514026803098	0.00312526924901203	0.0326212390474577	RLIMP1	processed_pseudogene	ENST00000339626	ENST00000339626	NA	NA	NA	ring finger protein, LIM domain interacting pseudogene 1 [Source:HGNC Symbol;Acc:HGNC:39682]
ENSG00000158427	95.3869364923031	1.93346253583404	0.463381658376854	4.17250553810574	3.01268274387661e-05	0.00162973508432223	TMSB15B	protein_coding	ENST00000419165	ENST00000540220	286527	GO:0003674	MF	thymosin beta 15B [Source:HGNC Symbol;Acc:HGNC:28612]
ENSG00000254856	10.9366274613561	1.93330068942885	0.678570734384904	2.84907761485072	0.00438461826333407	0.0403837322020411	NDUFA3P2	processed_pseudogene	ENST00000531434	ENST00000531434	NA	NA	NA	NADH:ubiquinone oxidoreductase subunit A3 pseudogene 2 [Source:HGNC Symbol;Acc:HGNC:45051]
ENSG00000200113	10.5893861078042	1.93223006651082	0.62401850950344	3.09643069409653	0.00195865642596227	0.0245416118615023		snoRNA	ENST00000363243	ENST00000363243	NA	NA	NA	NULL
ENSG00000196565	200.702323981146	1.93097974813439	0.50445614685719	3.82784462071594	0.000129270316474395	0.00423894025056146	HBG2	protein_coding	ENST00000336906	ENST00000336906	3048	GO:0004601	MF	hemoglobin subunit gamma 2 [Source:HGNC Symbol;Acc:HGNC:4832]
ENSG00000237646	15.6891882345071	1.92928922579414	0.670388741800821	2.87786638631731	0.00400374677961369	0.0378741868136441	HLCS-IT1	lncRNA	ENST00000434195	ENST00000434195	NA	NA	NA	HLCS intronic transcript 1 [Source:HGNC Symbol;Acc:HGNC:41343]
ENSG00000273824	59.677034213559	1.92811461446303	0.802223735843336	2.40346243611964	0.016240635457325	0.0918832663507403		lncRNA	ENST00000612531	ENST00000612531	NA	NA	NA	novel transcript
ENSG00000271447	68.9496080192121	1.92789537676801	0.681483520254869	2.82896844819812	0.00466983026043155	0.0417902392993944	MMP28	protein_coding	ENST00000615317	ENST00000605424	79148	GO:0004222	BP	matrix metallopeptidase 28 [Source:HGNC Symbol;Acc:HGNC:14366]
ENSG00000206052	293.17793111858	1.92768539596075	0.636966480148144	3.0263529652493	0.00247523172820059	0.0283322691575092	DOK6	protein_coding	ENST00000382713	ENST00000382713	220164	GO:0005515	BP	docking protein 6 [Source:HGNC Symbol;Acc:HGNC:28301]
ENSG00000270071	62.8569344701976	1.92760981137174	0.817401651761629	2.35821619300308	0.0183629951024043	0.099187971979581		lncRNA	ENST00000652633	ENST00000652633	NA	NA	NA	novel transcript
ENSG00000236469	146.317678648442	1.92610372174706	0.691264889630649	2.78634681240096	0.00533058063881886	0.0456027135332288		lncRNA	ENST00000434990	ENST00000434990	NA	NA	NA	novel transcript, antisense to NAGK
ENSG00000186153	9060.42640050971	1.92582144045801	0.372395870805015	5.17143607498902	2.32301743344665e-07	6.17239396875207e-05	WWOX	protein_coding	ENST00000627394	ENST00000566780	51741	GO:0001649	CC	WW domain containing oxidoreductase [Source:HGNC Symbol;Acc:HGNC:12799]
ENSG00000239151	21.4351824652913	1.92536374982353	0.595365347281676	3.23391974123851	0.00122103763876881	0.0182102683627323	RNU7-195P	snRNA	ENST00000458793	ENST00000458793	NA	NA	NA	RNA, U7 small nuclear 195 pseudogene [Source:HGNC Symbol;Acc:HGNC:45729]
ENSG00000153898	586.355841832669	1.92523774630477	0.758559298144787	2.53801878246479	0.0111482001146231	0.0725335540767053	MCOLN2	protein_coding	ENST00000370608	ENST00000370608	255231	GO:0002250	BP	mucolipin TRP cation channel 2 [Source:HGNC Symbol;Acc:HGNC:13357]
ENSG00000207780	5.95205596174473	1.92395513590347	0.770747052282444	2.49622120539544	0.0125524297329453	0.0782869521625319	MIR648	miRNA	ENST00000385046	ENST00000385046	693233	GO:0016442	CC	microRNA 648 [Source:HGNC Symbol;Acc:HGNC:32904]
ENSG00000166035	315.666889700639	1.92357780389784	0.796182873801188	2.41599997587762	0.0156920623864859	0.0900791686096987	LIPC	protein_coding	ENST00000356113	ENST00000299022	3990	GO:0004465	MF	lipase C, hepatic type [Source:HGNC Symbol;Acc:HGNC:6619]
ENSG00000279687	22.9634948770561	1.92272088040711	0.441001017499137	4.35990123403937	1.30121160318749e-05	0.000882187288795178		artifact	ENST00000623188	ENST00000623188	NA	NA	NA	novel transcript, antisense to CH507-9B2.3
ENSG00000173124	142.428692731091	1.92220323439909	0.639732091705527	3.00470034147341	0.00265842617870858	0.0295402485835834	ACSM6	protein_coding	ENST00000327739	ENST00000394005	142827	GO:0004321	MF	acyl-CoA synthetase medium chain family member 6 [Source:HGNC Symbol;Acc:HGNC:31665]
ENSG00000183090	83.9517870263571	1.92182677789409	0.441042125298809	4.35746761512188	1.3157595957101e-05	0.000888715677580937	FREM3	protein_coding	ENST00000329798	ENST00000329798	166752	GO:0005604	MF	FRAS1 related extracellular matrix 3 [Source:HGNC Symbol;Acc:HGNC:25172]
ENSG00000286592	4.62764001369484	1.92051314485696	0.728123760409786	2.63761910993827	0.00834902993723942	0.0605581183886157	LINC02885	lncRNA	ENST00000668433	ENST00000668433	NA	NA	NA	long intergenic non-protein coding RNA 2885 [Source:HGNC Symbol;Acc:HGNC:41188]
ENSG00000225632	16.216666492524	1.92042642781106	0.584637494411945	3.28481571258564	0.00102049095715368	0.0161172658046695		lncRNA	ENST00000426901	ENST00000426901	NA	NA	NA	novel transcript
ENSG00000101230	93.6873970781151	1.91989538473201	0.531517071597935	3.61210483599351	0.00030372172416627	0.00756394777703123	ISM1	protein_coding	ENST00000262487	ENST00000262487	140862	GO:0005576	BP	isthmin 1 [Source:HGNC Symbol;Acc:HGNC:16213]
ENSG00000154447	1941.16450015753	1.91704655345168	0.309491576498549	6.19418006506121	5.85892171799486e-10	9.20513022615053e-07	SH3RF1	protein_coding	ENST00000284637	ENST00000284637	57630	GO:0001764	BP	SH3 domain containing ring finger 1 [Source:HGNC Symbol;Acc:HGNC:17650]
ENSG00000288393	120.012377976982	1.91578297838527	0.535957971744571	3.57450225462512	0.000350894789304178	0.00823372344564662	ZNF75CP	transcribed_processed_pseudogene	ENST00000672296	ENST00000671814	NA	NA	NA	zinc finger protein 75C, pseudogene [Source:HGNC Symbol;Acc:HGNC:13148]
ENSG00000288853	221.228180816831	1.91455311417466	0.463386198620348	4.13165761059547	3.6015661344698e-05	0.00184343050758075		lncRNA	ENST00000691438	ENST00000691438	NA	NA	NA	novel transcript, antisense to GAB2
ENSG00000229010	8.59626945894515	1.91361302535211	0.736755389437592	2.59735192003533	0.00939456175502515	0.0649263850851363		processed_pseudogene	ENST00000450968	ENST00000450968	NA	NA	NA	novel pseudogene
ENSG00000283408	7.85293081721618	1.91152459739759	0.769940432725352	2.48269153839783	0.0130393945532596	0.0801154233184378	MIR548A1HG	lncRNA	ENST00000636739	ENST00000637804	NA	NA	NA	MIR548A1 host gene [Source:HGNC Symbol;Acc:HGNC:53539]
ENSG00000200455	6.85282449275777	1.91124494564174	0.750374425587618	2.54705501742687	0.0108636304259368	0.0711948039665675	RNU6-1112P	snRNA	ENST00000363585	ENST00000363585	NA	NA	NA	RNA, U6 small nuclear 1112, pseudogene [Source:HGNC Symbol;Acc:HGNC:48075]
ENSG00000284672	42.7200635762503	1.91108223815437	0.558732379537371	3.42038927426534	0.000625315856945763	0.011797888821916		lncRNA	ENST00000641183	ENST00000641183	NA	NA	NA	novel transcript
ENSG00000173114	312.634841668041	1.91094493112182	0.411092606106853	4.64845366405135	3.34432726422628e-06	0.000354400615894665	LRRN3	protein_coding	ENST00000308478	ENST00000308478	54674	GO:0005615	CC	leucine rich repeat neuronal 3 [Source:HGNC Symbol;Acc:HGNC:17200]
ENSG00000170365	1116.9999549958	1.91054774478334	0.392695001866235	4.86522042731304	1.14329315336502e-06	0.000169319841762288	SMAD1	protein_coding	ENST00000514778	ENST00000302085	4086	GO:0000165	BP	SMAD family member 1 [Source:HGNC Symbol;Acc:HGNC:6767]
ENSG00000287789	64.5224235925034	1.91054093805399	0.65959112375399	2.89655343931914	0.00377286378778702	0.0365806830790104		lncRNA	ENST00000662649	ENST00000662649	NA	NA	NA	novel transcript, antisense to BACH2
ENSG00000213931	196.541404380078	1.90928113021115	0.511546425525243	3.73237116895256	0.000189685717937999	0.00555468646953607	HBE1	protein_coding	ENST00000396895	ENST00000396895	3046	GO:0004601	MF	hemoglobin subunit epsilon 1 [Source:HGNC Symbol;Acc:HGNC:4830]
ENSG00000259336	257.491497455834	1.90868101889642	0.50474093077515	3.7815063184299	0.000155882264904635	0.00483101331440298		lncRNA	ENST00000559246	ENST00000559246	NA	NA	NA	novel transcript
ENSG00000258604	20.8374389147607	1.90832437426044	0.631729900838174	3.02079159420584	0.0025211482232576	0.0285772309271132		lncRNA	ENST00000533984	ENST00000533984	NA	NA	NA	novel transcript
ENSG00000283849	181.666084150222	1.90781216518562	0.574729568117106	3.31949541318342	0.000901802862144601	0.014838686763701		lncRNA	ENST00000640557	ENST00000640557	NA	NA	NA	novel transcript, antisense CSRNP1
ENSG00000285603	35.5136748663744	1.90758976755387	0.410438867257562	4.64768305277679	3.35684164902905e-06	0.000354686636927818		lncRNA	ENST00000650019	ENST00000650019	NA	NA	NA	novel transcript, antisense to GMDS
ENSG00000275389	3.66467825407374	1.90699604254996	0.778182783859373	2.45057598562163	0.0142627855264339	0.0848160502589004		lncRNA	ENST00000621669	ENST00000621669	NA	NA	NA	novel transcript
ENSG00000179344	5409.52671796386	1.9066572006349	0.796963456802022	2.39240229192659	0.016738484228772	0.0938061206716665	HLA-DQB1	protein_coding	ENST00000487676	ENST00000434651	3119	GO:0000139	CC	major histocompatibility complex, class II, DQ beta 1 [Source:HGNC Symbol;Acc:HGNC:4944]
ENSG00000162913	111.206556085287	1.90577207428289	0.477249308401562	3.99324219172959	6.51759364245614e-05	0.00270091472320866	OBSCN-AS1	lncRNA	ENST00000657820	ENST00000295012	574407	NA	NA	OBSCN antisense RNA 1 [Source:HGNC Symbol;Acc:HGNC:32047]
ENSG00000255122	55.5630278532411	1.90543290351208	0.749173519694856	2.54337994259084	0.0109785778101315	0.0717101554842034		processed_pseudogene	ENST00000533893	ENST00000533893	NA	NA	NA	40S ribosomal protein S24 (Rps24) pseudogene
ENSG00000288794	41.0563256470962	1.90522530504063	0.425490319169738	4.47771716347933	7.54454655779915e-06	0.000632551587964339		lncRNA	ENST00000692151	ENST00000692151	NA	NA	NA	novel transcript, sense intronic to LPP
ENSG00000233806	1566.36406845228	1.90517853568977	0.492204625596321	3.8707042490338	0.000108521387654719	0.00378525952151634	LINC01237	lncRNA	ENST00000430555	ENST00000415434	101927289	NA	NA	long intergenic non-protein coding RNA 1237 [Source:HGNC Symbol;Acc:HGNC:49793]
ENSG00000287649	8.28678554775264	1.90513998998229	0.695733314961496	2.73831933732788	0.00617540796415763	0.0502487147473092		lncRNA	ENST00000655190	ENST00000655190	NA	NA	NA	novel transcript, antisense to FHIT
ENSG00000286320	137.65282989231	1.90454238541092	0.446724391508521	4.26334989002854	2.01384804206389e-05	0.00122719077315381		lncRNA	ENST00000661355	ENST00000661355	NA	NA	NA	novel transcript, antisense to MAML3
ENSG00000244391	9.27778717837681	1.90395597891651	0.777042126618955	2.45026094943005	0.0142752716868118	0.0848160502589004	RN7SL330P	misc_RNA	ENST00000469709	ENST00000469709	NA	NA	NA	RNA, 7SL, cytoplasmic 330, pseudogene [Source:HGNC Symbol;Acc:HGNC:46346]
ENSG00000278992	13.3508973121242	1.90330010195257	0.732578726916528	2.5980826797465	0.0093745918601475	0.0648589597778447		TEC	ENST00000622980	ENST00000622980	NA	NA	NA	TEC
ENSG00000136231	369.57595898962	1.90310619384645	0.633917439315907	3.00213572906307	0.00268092613883857	0.0297119643596519	IGF2BP3	protein_coding	ENST00000258729	ENST00000258729	10643	GO:0000932	CC	insulin like growth factor 2 mRNA binding protein 3 [Source:HGNC Symbol;Acc:HGNC:28868]
ENSG00000237224	20.2816616422904	1.90305093548879	0.639218030064133	2.97715465769614	0.00290937206100919	0.0312027240933331		lncRNA	ENST00000598332	ENST00000598332	NA	NA	NA	novel transcript
ENSG00000270405	9.71146197506116	1.90259729152849	0.704276180487996	2.70149317020799	0.00690288980657583	0.0539569167316514		processed_pseudogene	ENST00000603054	ENST00000603054	NA	NA	NA	nuclear protein, transcriptional regulator, 1-like, pseudogene
ENSG00000230099	28.6911704055904	1.90245560460106	0.528079823285584	3.60259097339573	0.000315061082750042	0.0077128445820958	TRBV5-4	TR_V_gene	ENST00000454561	ENST00000454561	NA	GO:0002250	BP	T cell receptor beta variable 5-4 [Source:HGNC Symbol;Acc:HGNC:12221]
ENSG00000204195	10.0076428082775	1.90226649413299	0.666157584176559	2.85558033011722	0.00429582542138492	0.0398342179695061	AWAT1	protein_coding	ENST00000480702	ENST00000374521	158833	GO:0005789	BP	acyl-CoA wax alcohol acyltransferase 1 [Source:HGNC Symbol;Acc:HGNC:23252]
ENSG00000272970	49.5184680536017	1.90222854276796	0.486947390129814	3.90643544112814	9.36676538695641e-05	0.00346622956539301		lncRNA	ENST00000663807	ENST00000693086	107986163	NA	NA	novel transcript
ENSG00000266533	10.0768956638507	1.90158270175115	0.710015166547428	2.67822828489415	0.00740127553316976	0.05638450172968	MIR3619	miRNA	ENST00000579667	ENST00000579667	100500828	GO:0003730	MF	microRNA 3619 [Source:HGNC Symbol;Acc:HGNC:38998]
ENSG00000175183	226.998110139987	1.90121412856353	0.7515294072213	2.52979339237444	0.0114129710084264	0.0737516309657537	CSRP2	protein_coding	ENST00000311083	ENST00000311083	1466	GO:0003674	MF	cysteine and glycine rich protein 2 [Source:HGNC Symbol;Acc:HGNC:2470]
ENSG00000283791	212.082162949669	1.90112015376025	0.548110149561524	3.46850018245622	0.000523372171425359	0.0105715912725695	MIR612	miRNA	ENST00000384994	ENST00000384994	693197	GO:0016442	CC	microRNA 612 [Source:HGNC Symbol;Acc:HGNC:32868]
ENSG00000259003	16.8730029798185	1.90072464141671	0.757628403888618	2.50878218353617	0.0121148161929576	0.076535139501524		lncRNA	ENST00000557595	ENST00000557595	NA	NA	NA	novel transcript
ENSG00000231389	12877.6079361989	1.89977213743117	0.546832877377488	3.47413664398186	0.000512499969276466	0.0104336331773377	HLA-DPA1	protein_coding	ENST00000692443	ENST00000419277	3113	GO:0000139	CC	major histocompatibility complex, class II, DP alpha 1 [Source:HGNC Symbol;Acc:HGNC:4938]
ENSG00000237846	14.7448552006893	1.89869904487648	0.773217647881841	2.45558162061845	0.0140656807130613	0.0840822892054894		processed_pseudogene	ENST00000414297	ENST00000414297	NA	NA	NA	novel pseudogene
ENSG00000229956	884.595677351619	1.89765706029609	0.545398784207946	3.47939363864179	0.000502549812812102	0.0103065493960148	ZRANB2-DT	lncRNA	ENST00000455406	ENST00000663294	NA	NA	NA	ZRANB2 divergent transcript [Source:HGNC Symbol;Acc:HGNC:43595]
ENSG00000237410	83.8575897394072	1.89753999036545	0.639477835659078	2.96732722317069	0.0030040106455759	0.0317313442527129	NRXN2-AS1	lncRNA	ENST00000433606	ENST00000433606	NA	NA	NA	NRXN2 antisense RNA 1 [Source:HGNC Symbol;Acc:HGNC:40416]
ENSG00000253868	10.3125640524668	1.89746099572152	0.679348385835359	2.79306028436104	0.00522119605467556	0.0449971716269392	FER1L6-AS2	lncRNA	ENST00000520031	ENST00000669903	157376	NA	NA	FER1L6 antisense RNA 2 [Source:HGNC Symbol;Acc:HGNC:26534]
ENSG00000265421	19.0884572481233	1.89392829821536	0.75002088321634	2.52516741946379	0.0115643182541788	0.0742912363436455		miRNA	ENST00000581837	ENST00000581837	NA	NA	NA	NULL
ENSG00000274397	11.9235363661281	1.8936586078805	0.637681546153029	2.96959919775704	0.00298188520716794	0.0315896596790121		unprocessed_pseudogene	ENST00000620487	ENST00000620487	NA	NA	NA	ADAM metallopeptidase domain 20 (ADAM20) pseudogene
ENSG00000271743	10.4420422734258	1.89336761271126	0.491237023053081	3.8542852510257	0.000116068209277135	0.00396476721339066		lncRNA	ENST00000607368	ENST00000607368	NA	NA	NA	novel transcript
ENSG00000174233	379.176351029806	1.89281445433197	0.455853347464429	4.15224427956991	3.29230553224696e-05	0.00175214657898787	ADCY6	protein_coding	ENST00000547260	ENST00000357869	112	GO:0003091	MF	adenylate cyclase 6 [Source:HGNC Symbol;Acc:HGNC:237]
ENSG00000215244	1490.81846138324	1.89254444062412	0.617947257977022	3.06263101938466	0.00219400406132862	0.0262004397753374	LINC02649	lncRNA	ENST00000399868	ENST00000659311	399715	NA	NA	long intergenic non-protein coding RNA 2649 [Source:HGNC Symbol;Acc:HGNC:54134]
ENSG00000101282	45.1844040885059	1.89158768518803	0.650697237461146	2.90701662199846	0.00364893807740222	0.0357823680773424	RSPO4	protein_coding	ENST00000217260	ENST00000217260	343637	GO:0005515	MF	R-spondin 4 [Source:HGNC Symbol;Acc:HGNC:16175]
ENSG00000166341	184.770074107964	1.89055863711057	0.688362241002841	2.74645894922462	0.00602424245545011	0.0494517676200125	DCHS1	protein_coding	ENST00000299441	ENST00000299441	8642	GO:0001658	BP	dachsous cadherin-related 1 [Source:HGNC Symbol;Acc:HGNC:13681]
ENSG00000290988	92.9112832781956	1.88949964911284	0.665188385319181	2.84054816772875	0.00450360711171056	0.0409723934010002	ZNF781	lncRNA	ENST00000358582	ENST00000358582	163115	GO:0003677	MF	zinc finger protein 781 [Source:NCBI gene (formerly Entrezgene);Acc:163115]
ENSG00000251497	15.6102231577538	1.88913604014076	0.675064477981626	2.79845274304623	0.00513480826171002	0.0444647570920569	PITPNM2-AS1	lncRNA	ENST00000506255	ENST00000506255	100507091	NA	NA	PITPNM2 antisense RNA 1 [Source:HGNC Symbol;Acc:HGNC:53391]
ENSG00000288597	437.550842724003	1.88836497044602	0.478088014380146	3.94982704783833	7.82076835867191e-05	0.00305525713955641		lncRNA	ENST00000674469	ENST00000674236	NA	NA	NA	novel transcript
ENSG00000226306	90.2242998352626	1.88807044990695	0.486451706101443	3.88131118922054	0.00010389479686553	0.00368795911545462	NPY6R	transcribed_unitary_pseudogene	ENST00000510937	ENST00000503807	4888	NA	NA	neuropeptide Y receptor Y6 (pseudogene) [Source:HGNC Symbol;Acc:HGNC:7959]
ENSG00000237975	170.451374879649	1.88753763284545	0.717269254853302	2.63156077034348	0.0084993665257965	0.0612939998400488	FLG-AS1	lncRNA	ENST00000593011	ENST00000653548	339400	NA	NA	FLG antisense RNA 1 [Source:HGNC Symbol;Acc:HGNC:27913]
ENSG00000234883	583.055802125904	1.88724215420993	0.676460148625009	2.78987928268353	0.00527276971864649	0.0452914897151841	MIR155HG	lncRNA	ENST00000456917	ENST00000456917	114614	GO:0016442	CC	MIR155 host gene [Source:HGNC Symbol;Acc:HGNC:35460]
ENSG00000276241	497.914525438065	1.88722518095519	0.672874755227972	2.8047198476272	0.00503603304717809	0.0438405420845164		lncRNA	ENST00000617914	ENST00000617914	NA	NA	NA	novel transcript, antisense TBC1D3B
ENSG00000183655	135.348940538144	1.88515558258069	0.38164865748913	4.93950534238257	7.83209980009027e-07	0.000132873595481719	KLHL25	protein_coding	ENST00000337975	ENST00000337975	64410	GO:0005737	CC	kelch like family member 25 [Source:HGNC Symbol;Acc:HGNC:25732]
ENSG00000265123	7.21162413835293	1.88398492133794	0.62430948291383	3.01770992256091	0.00254692571655434	0.0287372408598866	RN7SL200P	misc_RNA	ENST00000585129	ENST00000585129	NA	NA	NA	RNA, 7SL, cytoplasmic 200, pseudogene [Source:HGNC Symbol;Acc:HGNC:46216]
ENSG00000204393	249.28341914368	1.88385908194467	0.40381659806894	4.66513533855054	3.0841398207125e-06	0.000337495355224526	NOL4L-DT	lncRNA	ENST00000375671	ENST00000375671	149950	GO:0005515	MF	NOL4L divergent transcript [Source:HGNC Symbol;Acc:HGNC:44310]
ENSG00000273582	29.3679116837882	1.88316892461282	0.733083282992554	2.56883353952016	0.0102041460637161	0.0686277725960254		lncRNA	ENST00000620963	ENST00000620963	NA	NA	NA	novel transcript
ENSG00000151967	970.217731048317	1.88218036934335	0.537452093639513	3.50204305019564	0.000461705010289335	0.00975682587825464	SCHIP1	protein_coding	ENST00000445224	ENST00000445224	29970	GO:0005515	MF	schwannomin interacting protein 1 [Source:HGNC Symbol;Acc:HGNC:15678]
ENSG00000238365	4.35384543985503	1.88189039681791	0.796281455247228	2.36334826639109	0.0181106412386225	0.098370509990212	RNU7-57P	snRNA	ENST00000459540	ENST00000459540	NA	NA	NA	RNA, U7 small nuclear 57 pseudogene [Source:HGNC Symbol;Acc:HGNC:34153]
ENSG00000253973	29.4600798939097	1.8817123688408	0.599392088625399	3.13936804397298	0.00169312649888811	0.0224112890709966	NRIP3-DT	lncRNA	ENST00000670061	ENST00000670061	NA	NA	NA	NRIP3 divergent transcript [Source:HGNC Symbol;Acc:HGNC:55524]
ENSG00000286478	90.3975375087817	1.88146236879305	0.424334943716594	4.43390862961701	9.25398578224091e-06	0.000723813918240384		lncRNA	ENST00000665298	ENST00000665298	NA	NA	NA	novel transcript, antisense to HIBADH
ENSG00000256341	11.7643772508135	1.88103481756973	0.477360359405945	3.94049229372669	8.13145630261769e-05	0.003152771512354		lncRNA	ENST00000543817	ENST00000543817	NA	NA	NA	novel transcript
ENSG00000289573	21.4333420998233	1.88086078632516	0.733769856970046	2.56328434380202	0.0103687092894562	0.0691298300523597		lncRNA	ENST00000689453	ENST00000689453	NA	NA	NA	novel transcript
ENSG00000164484	33.8121011147776	1.8804922148742	0.691927966934945	2.71775720123625	0.00657260494970663	0.0523375170697662	TMEM200A	protein_coding	ENST00000296978	ENST00000296978	114801	GO:0005515	MF	transmembrane protein 200A [Source:HGNC Symbol;Acc:HGNC:21075]
ENSG00000196381	35.916666648457	1.88023597737606	0.664198023469874	2.83083645379342	0.00464264534229152	0.0416642676909341	ZNF781	transcribed_unprocessed_pseudogene	ENST00000697736	ENST00000697736	NA	NA	NA	zinc finger protein 781 [Source:HGNC Symbol;Acc:HGNC:26745]
ENSG00000223575	6.26069785032606	1.88017262570556	0.709622877600643	2.64953778274842	0.00806019592109975	0.0594293490726098	RBMX2P3	processed_pseudogene	ENST00000450122	ENST00000450122	NA	NA	NA	RBMX2 pseudogene 3 [Source:HGNC Symbol;Acc:HGNC:39925]
ENSG00000131044	76.7050041057181	1.8794510713045	0.528730653891278	3.55464745134857	0.000378486219129457	0.00860187296507048	TTLL9	protein_coding	ENST00000535842	ENST00000535842	164395	GO:0000226	BP	tubulin tyrosine ligase like 9 [Source:HGNC Symbol;Acc:HGNC:16118]
ENSG00000229694	288.08870384322	1.87923073291247	0.558855769839152	3.36263994098754	0.000772009854680943	0.0134250953362611	LINC00484	lncRNA	ENST00000439438	ENST00000439438	100129347	NA	NA	long intergenic non-protein coding RNA 484 [Source:NCBI gene (formerly Entrezgene);Acc:100129347]
ENSG00000254553	541.956539375483	1.8777131151751	0.60144106608999	3.12202345506975	0.00179612628224629	0.0232550409656939		protein_coding	ENST00000480336	ENST00000480336	NA	NA	NA	novel transcript
ENSG00000249364	27.2870958807008	1.87768971859249	0.46142677940348	4.06931240752849	4.71520871248128e-05	0.00220918811741544	LINC02997	lncRNA	ENST00000503106	ENST00000503106	101928858	NA	NA	long intergenic non-protein coding RNA 2997 [Source:HGNC Symbol;Acc:HGNC:56113]
ENSG00000275029	11.0134076958509	1.87746248737632	0.700855404816955	2.67881573641664	0.00738830393277099	0.0563138052973239	HMGB1P24	transcribed_processed_pseudogene	ENST00000615653	ENST00000615653	NA	NA	NA	high mobility group box 1 pseudogene 24 [Source:HGNC Symbol;Acc:HGNC:39115]
ENSG00000269934	398.299074377076	1.87685612798309	0.501147133916255	3.74511994774118	0.000180307609111316	0.00535381738935622		lncRNA	ENST00000664490	ENST00000664490	NA	NA	NA	novel transcript, antisense to OBSCN
ENSG00000141497	152.509683063129	1.87660994350086	0.782777626024687	2.39737299727276	0.0165131043931558	0.0929032446444149	ZMYND15	protein_coding	ENST00000433935	ENST00000433935	84225	GO:0001673	BP	zinc finger MYND-type containing 15 [Source:HGNC Symbol;Acc:HGNC:20997]
ENSG00000248202	8.99673698924896	1.8765697059123	0.729284042685259	2.57316710098671	0.0100772540160901	0.0680148769378844	LINC02234	lncRNA	ENST00000502324	ENST00000669006	109729164	NA	NA	long intergenic non-protein coding RNA 2234 [Source:HGNC Symbol;Acc:HGNC:53105]
ENSG00000257642	18.7731997093588	1.87656078858204	0.705029078057883	2.66167857040922	0.00777520869242556	0.0582095445874515	C12orf75-AS1	lncRNA	ENST00000549251	ENST00000549251	105369954	NA	NA	C12orf75 antisense RNA 1 [Source:HGNC Symbol;Acc:HGNC:55936]
ENSG00000235397	36.1479336957336	1.87561459834792	0.584001245388633	3.21166198387087	0.00131969548733888	0.0191751170609079	EPN2-AS1	lncRNA	ENST00000451099	ENST00000451099	100874018	NA	NA	EPN2 antisense RNA 1 [Source:HGNC Symbol;Acc:HGNC:40849]
ENSG00000290863	58.9620508597462	1.87542342935642	0.628049031730465	2.98610989684843	0.00282551082221637	0.0306986321107281		lncRNA	ENST00000548191	ENST00000548191	NA	NA	NA	novel transcript
ENSG00000267304	20.7537175430314	1.87488392454981	0.433462047221367	4.32537043685469	1.52275749399829e-05	0.000991466032488688		lncRNA	ENST00000586675	ENST00000586675	NA	NA	NA	novel transcript, antisense to PIP5K1C
ENSG00000280153	522.489882537317	1.87455903316406	0.467180723410819	4.0124922524161	6.00810514873226e-05	0.00257238018548091		TEC	ENST00000625054	ENST00000625054	NA	NA	NA	TEC
ENSG00000133401	1024.87998781566	1.87376785736243	0.644436364679427	2.9076072674678	0.00364205412242294	0.0357439619141433	PDZD2	protein_coding	ENST00000515115	ENST00000438447	23037	GO:0005576	CC	PDZ domain containing 2 [Source:HGNC Symbol;Acc:HGNC:18486]
ENSG00000236501	5.04833436376398	1.87207013465887	0.624965444457663	2.99547783203186	0.00274015217877584	0.0301211815583804		lncRNA	ENST00000665720	ENST00000441205	NA	NA	NA	novel transcript
ENSG00000070882	3886.84309675493	1.87190173508676	0.460231582480358	4.06730395380168	4.75601907920797e-05	0.00221759361866141	OSBPL3	protein_coding	ENST00000313367	ENST00000313367	26031	GO:0005515	MF	oxysterol binding protein like 3 [Source:HGNC Symbol;Acc:HGNC:16370]
ENSG00000248954	4.47690903156254	1.87094302586699	0.731168245575886	2.55884064603132	0.0105021870411229	0.0697406737291623		lncRNA	ENST00000515692	ENST00000515692	NA	NA	NA	novel transcript
ENSG00000147117	22.4453802762718	1.86843944447125	0.514138075650719	3.63411996302056	0.000278931066279076	0.00721507015823959	ZNF157	protein_coding	ENST00000377073	ENST00000377073	7712	GO:0000978	MF	zinc finger protein 157 [Source:HGNC Symbol;Acc:HGNC:12942]
ENSG00000237818	5.08923098325962	1.86812577999612	0.714234113832823	2.6155650420716	0.00890799533468255	0.0630680484745472	RPS3AP29	processed_pseudogene	ENST00000437728	ENST00000437728	NA	NA	NA	RPS3A pseudogene 29 [Source:HGNC Symbol;Acc:HGNC:35531]
ENSG00000160062	628.496926983308	1.86801252005807	0.592462169170425	3.15296506218058	0.00161621149236641	0.0217812819684626	ZBTB8A	protein_coding	ENST00000373510	ENST00000373510	653121	GO:0000122	BP	zinc finger and BTB domain containing 8A [Source:HGNC Symbol;Acc:HGNC:24172]
ENSG00000243254	5.77782805461106	1.8679017483916	0.703987894250519	2.65331515448886	0.00797054129386833	0.0590676961321561	RN7SL350P	misc_RNA	ENST00000492591	ENST00000492591	NA	NA	NA	RNA, 7SL, cytoplasmic 350, pseudogene [Source:HGNC Symbol;Acc:HGNC:46366]
ENSG00000066056	173.756213331841	1.86763362969329	0.63597324200535	2.93665441615793	0.00331773598741202	0.0337147659283242	TIE1	protein_coding	ENST00000372476	ENST00000372476	7075	GO:0001525	MF	tyrosine kinase with immunoglobulin like and EGF like domains 1 [Source:HGNC Symbol;Acc:HGNC:11809]
ENSG00000250574	13.5934915133159	1.86751671313721	0.565330447592941	3.30340727461029	0.000955175523873541	0.0154435001032189		processed_pseudogene	ENST00000505876	ENST00000505876	NA	NA	NA	sulfiredoxin 1 homolog (S. cerevisiae) (SRXN1) pseudogene
ENSG00000277851	125.374329587148	1.86545506024044	0.68914585077531	2.70690893392414	0.00679128837431419	0.0533384039761394	LINC02391	lncRNA	ENST00000615716	ENST00000615716	NA	NA	NA	long intergenic non-protein coding RNA 2391 [Source:HGNC Symbol;Acc:HGNC:53318]
ENSG00000201343	10.8466088940006	1.86516065879491	0.646545389672324	2.88481008230559	0.00391649850536327	0.0374706354222418	Y_RNA	misc_RNA	ENST00000364473	ENST00000364473	NA	NA	NA	Y RNA [Source:RFAM;Acc:RF00019]
ENSG00000081189	8882.72060739588	1.86482552568421	0.369587051361997	5.04570038049758	4.51863041661064e-07	9.22515416579899e-05	MEF2C	protein_coding	ENST00000504921	ENST00000504921	4208	GO:0000122	BP	myocyte enhancer factor 2C [Source:HGNC Symbol;Acc:HGNC:6996]
ENSG00000255189	113.817582743584	1.86366388257582	0.580676814853213	3.20946839085857	0.0013298066722256	0.0192774338522418	GLYATL1P1	unprocessed_pseudogene	ENST00000528297	ENST00000528297	NA	NA	NA	glycine-N-acyltransferase like 1 pseudogene 1 [Source:HGNC Symbol;Acc:HGNC:37866]
ENSG00000165935	253.522245815841	1.86337073917595	0.780899088794015	2.38618634073917	0.0170241226079321	0.0948403114461968	SMCO2	protein_coding	ENST00000535986	ENST00000535986	341346	GO:0016020	CC	single-pass membrane protein with coiled-coil domains 2 [Source:HGNC Symbol;Acc:HGNC:34448]
ENSG00000127074	37.7823007146177	1.86321069439018	0.682165254331177	2.73131866884212	0.00630814437785773	0.0510071839870814	RGS13	protein_coding	ENST00000543215	ENST00000391995	6003	GO:0003924	MF	regulator of G protein signaling 13 [Source:HGNC Symbol;Acc:HGNC:9995]
ENSG00000182533	137.417895054443	1.86314602756264	0.436860262439339	4.26485580803164	2.0003134083108e-05	0.00122216722205073	CAV3	protein_coding	ENST00000343849	ENST00000343849	859	GO:0000139	CC	caveolin 3 [Source:HGNC Symbol;Acc:HGNC:1529]
ENSG00000148671	114.586019517931	1.86311932560851	0.772783911630766	2.41091888374962	0.0159123870344365	0.0907775632261568	ADIRF	protein_coding	ENST00000416348	ENST00000372013	10974	GO:0003674	MF	adipogenesis regulatory factor [Source:HGNC Symbol;Acc:HGNC:24043]
ENSG00000182247	8835.62753092004	1.86116077927462	0.502004621263054	3.70745746242714	0.000209350567645409	0.00591484918876818	UBE2E2	protein_coding	ENST00000425792	ENST00000396703	7325	GO:0004842	BP	ubiquitin conjugating enzyme E2 E2 [Source:HGNC Symbol;Acc:HGNC:12478]
ENSG00000249526	189.043958994353	1.86109232084971	0.451003076605839	4.12656236151632	3.68226184233322e-05	0.00187147980217375		lncRNA	ENST00000515296	ENST00000515296	NA	NA	NA	novel transcript
ENSG00000287042	526.161955425434	1.8603267046513	0.539765348984782	3.4465471119076	0.000567799554596284	0.0110790966098115		lncRNA	ENST00000654595	ENST00000702609	NA	NA	NA	novel transcript
ENSG00000260685	9.42995438078223	1.86014756639218	0.606057419285751	3.0692596232621	0.00214590016620548	0.0258825929259016		processed_pseudogene	ENST00000563702	ENST00000563702	NA	NA	NA	RWD domain containing 1 (RWDD1) pseudogene
ENSG00000247708	1061.32037868903	1.85992484284254	0.399150406635846	4.65970925225535	3.16656343144294e-06	0.000342595617241383	STX18-AS1	lncRNA	ENST00000664571	ENST00000670162	100507266	NA	NA	STX18 antisense RNA 1 (head to head) [Source:HGNC Symbol;Acc:HGNC:48877]
ENSG00000286062	11.9242017989686	1.85989342435424	0.766440471079687	2.4266639022	0.0152383654374177	0.0883732263595772		lncRNA	ENST00000652255	ENST00000701590	NA	NA	NA	novel transcript
ENSG00000267767	113.90279814553	1.85860084277898	0.745363346176454	2.49355009514914	0.0126472736426045	0.0787154461503885	LINC01801	lncRNA	ENST00000587150	ENST00000587150	400685	NA	NA	long intergenic non-protein coding RNA 1801 [Source:HGNC Symbol;Acc:HGNC:52592]
ENSG00000211727	20.9035390723898	1.85854783122289	0.592185215624587	3.1384569931599	0.0016983985617817	0.0224646158230394	TRBV7-6	TR_V_gene	ENST00000390374	ENST00000390374	NA	GO:0002250	BP	T cell receptor beta variable 7-6 [Source:HGNC Symbol;Acc:HGNC:12240]
ENSG00000261070	107.284573305831	1.85844660653799	0.350868406519154	5.29670546566162	1.17910650890405e-07	3.9090085142896e-05		lncRNA	ENST00000562772	ENST00000562772	338694	NA	NA	novel transcript
ENSG00000234619	14.8082820464688	1.85765383344544	0.574259260101852	3.23486961815115	0.00121698289725053	0.018194825806804	RPL7P11	processed_pseudogene	ENST00000437586	ENST00000437586	NA	NA	NA	ribosomal protein L7 pseudogene 11 [Source:HGNC Symbol;Acc:HGNC:35667]
ENSG00000277382	12.7697464705224	1.856119068446	0.540475074190148	3.43423620641012	0.000594226138419339	0.0113553441237024		lncRNA	ENST00000612163	ENST00000612163	NA	NA	NA	novel transcript, antisense to MXRA7
ENSG00000124664	5.45716348729998	1.85528471535858	0.656673491729815	2.82527730862315	0.00472397123307825	0.0421071364851015	SPDEF	protein_coding	ENST00000374037	ENST00000374037	25803	GO:0000122	BP	SAM pointed domain containing ETS transcription factor [Source:HGNC Symbol;Acc:HGNC:17257]
ENSG00000287292	66.8819934560341	1.85346154527672	0.725681570610157	2.55409758266055	0.0106463414712721	0.0703320284105831		lncRNA	ENST00000669991	ENST00000661928	NA	NA	NA	novel transcript
ENSG00000184557	2212.61746145987	1.85163258991688	0.686058869857486	2.69894125893528	0.00695604531441394	0.0542667645685799	SOCS3	protein_coding	ENST00000330871	ENST00000330871	9021	GO:0001784	BP	suppressor of cytokine signaling 3 [Source:HGNC Symbol;Acc:HGNC:19391]
ENSG00000231201	1075.0683313554	1.85002904033788	0.53779809307852	3.44000669423677	0.000581699798511581	0.0112287948285334		lncRNA	ENST00000436429	ENST00000436429	NA	NA	NA	novel transcript
ENSG00000286894	34.8588563218767	1.84968359484661	0.492881905900263	3.75279265216302	0.000174875494825476	0.00524423309627668		lncRNA	ENST00000655872	ENST00000655872	112268165	NA	NA	novel transcript, antisense to WWOX
ENSG00000243854	6.50379997279149	1.84916264790625	0.766266069682505	2.4132122262342	0.015812609284191	0.09039779292731	RN7SL67P	misc_RNA	ENST00000492147	ENST00000492147	NA	NA	NA	RNA, 7SL, cytoplasmic 67, pseudogene [Source:HGNC Symbol;Acc:HGNC:46083]
ENSG00000162722	3500.90071972642	1.84900165883209	0.618014444043206	2.99184214326037	0.00277299610478065	0.0303606320364744	TRIM58	protein_coding	ENST00000366481	ENST00000366481	25893	GO:0000209	BP	tripartite motif containing 58 [Source:HGNC Symbol;Acc:HGNC:24150]
ENSG00000229656	127.877921691735	1.84820067445108	0.650141198674928	2.84276812209094	0.00447235954490376	0.0408114102309702	ITGB1-DT	lncRNA	ENST00000659846	ENST00000450890	NA	NA	NA	ITGB1 divergent transcript [Source:HGNC Symbol;Acc:HGNC:53718]
ENSG00000288077	4.96923263973681	1.84692042049447	0.640620202279826	2.88301932084204	0.00393883281018069	0.037551675941513		lncRNA	ENST00000659348	ENST00000659348	NA	NA	NA	novel transcript, antisense to COLQ
ENSG00000232120	5.67529796314264	1.84632536649249	0.656875156560259	2.81077058258805	0.00494230124123145	0.0433272677470014		lncRNA	ENST00000424274	ENST00000424274	NA	NA	NA	novel transcript
ENSG00000171310	37684.090087389	1.84605417129128	0.375577277372336	4.91524456486529	8.86716956109805e-07	0.000142410684115484	CHST11	protein_coding	ENST00000550711	ENST00000303694	50515	GO:0000139	CC	carbohydrate sulfotransferase 11 [Source:HGNC Symbol;Acc:HGNC:17422]
ENSG00000280062	10.9853837570738	1.84574526153885	0.620144271382914	2.97631591020402	0.00291734172315115	0.0312266174489899		TEC	ENST00000623365	ENST00000623365	NA	NA	NA	TEC
ENSG00000243004	547.22109944394	1.84574064816745	0.70246907718128	2.62750448115617	0.00860137089304187	0.0617189071232006		lncRNA	ENST00000457921	ENST00000435968	NA	NA	NA	novel transcript, sense overlapping to MACC1
ENSG00000257657	27.8710080671323	1.84550141212167	0.609525995481431	3.02776489567767	0.00246369680093213	0.0283168408392123		lncRNA	ENST00000551229	ENST00000551229	NA	NA	NA	novel transcript
ENSG00000231312	842.761182903101	1.84514142593915	0.562582428692862	3.27977080661098	0.00103891448962205	0.0162661239155036	MAP4K3-DT	lncRNA	ENST00000426083	ENST00000670934	NA	NA	NA	MAP4K3 divergent transcript [Source:HGNC Symbol;Acc:HGNC:54056]
ENSG00000245384	192.451614751522	1.84467603759484	0.750546271694768	2.45777789746324	0.0139799603160086	0.083777752235371	CXXC4-AS1	lncRNA	ENST00000500179	ENST00000500179	101929468	NA	NA	CXXC4 antisense RNA 1 [Source:HGNC Symbol;Acc:HGNC:41054]
ENSG00000152990	1377.7319319467	1.84233621696827	0.369244465710701	4.98947550485894	6.05434504635256e-07	0.00011335741585233	ADGRA3	protein_coding	ENST00000511051	ENST00000334304	166647	GO:0004930	MF	adhesion G protein-coupled receptor A3 [Source:HGNC Symbol;Acc:HGNC:13839]
ENSG00000151320	189.66286192612	1.84088029187404	0.577500344629164	3.18766959880542	0.00143424319313495	0.0202838234369017	AKAP6	protein_coding	ENST00000280979	ENST00000280979	9472	GO:0001508	BP	A-kinase anchoring protein 6 [Source:HGNC Symbol;Acc:HGNC:376]
ENSG00000258980	6.38628122314492	1.8408000095718	0.757575754127201	2.42985602369572	0.0151048217697732	0.0879079944000807	EIF1AXP2	processed_pseudogene	ENST00000555940	ENST00000555940	NA	NA	NA	EIF1AX pseudogene 2 [Source:HGNC Symbol;Acc:HGNC:44295]
ENSG00000288054	36.4658093898625	1.8407326667255	0.774748808256751	2.37590900057956	0.0175057794710535	0.0963284371807506		lncRNA	ENST00000668291	ENST00000668291	NA	NA	NA	novel transcript, antisense to PDE7B
ENSG00000258791	7.29592103764457	1.84032249593313	0.604970642482696	3.04200297783172	0.00235009569527751	0.0275009902994003	LINC00520	lncRNA	ENST00000647781	ENST00000647781	645687	NA	NA	long intergenic non-protein coding RNA 520 [Source:HGNC Symbol;Acc:HGNC:19843]
ENSG00000273742	10.2691241440551	1.84013071473368	0.780161555730377	2.35865341122964	0.0183413769409276	0.0991860783827122	MIR6075	miRNA	ENST00000620782	ENST00000620782	102466103	NA	NA	microRNA 6075 [Source:HGNC Symbol;Acc:HGNC:50198]
ENSG00000270571	83.4565323108195	1.83895834186223	0.478981211303916	3.83931206164871	0.000123379531165038	0.00412818772053686		lncRNA	ENST00000604271	ENST00000604271	105374811	NA	NA	novel transcript, antisense to TACR1
ENSG00000258784	13.6970682327044	1.83895378693902	0.615178134651676	2.98930290814101	0.00279614777547689	0.0305446179004332		lncRNA	ENST00000554458	ENST00000554458	NA	NA	NA	novel transcript
ENSG00000242321	13.0336854896459	1.83883959929818	0.605330694654409	3.03774385726136	0.00238356462902619	0.0277667606171794	RPL23AP40	processed_pseudogene	ENST00000487630	ENST00000487630	NA	NA	NA	ribosomal protein L23a pseudogene 40 [Source:HGNC Symbol;Acc:HGNC:35587]
ENSG00000135094	95.9287008728027	1.83833013911212	0.339742523076283	5.41095098272216	6.26909317987991e-08	2.41806518592029e-05	SDS	protein_coding	ENST00000257549	ENST00000257549	10993	GO:0003941	MF	serine dehydratase [Source:HGNC Symbol;Acc:HGNC:10691]
ENSG00000189377	73.7868854977682	1.83715043378629	0.494811452059667	3.71282925271656	0.000204955167170127	0.00584550901409605	CXCL17	protein_coding	ENST00000601181	ENST00000601181	284340	GO:0001525	BP	C-X-C motif chemokine ligand 17 [Source:HGNC Symbol;Acc:HGNC:19232]
ENSG00000164520	8.15470557039688	1.83635800230512	0.702543417343154	2.6138711956761	0.00895227790353615	0.0632328995938589	RAET1E	protein_coding	ENST00000357183	ENST00000357183	135250	GO:0001916	BP	retinoic acid early transcript 1E [Source:HGNC Symbol;Acc:HGNC:16793]
ENSG00000171843	3181.79864035174	1.83580782882321	0.63729436329332	2.8806277515721	0.00396884074885336	0.037721733114299	MLLT3	protein_coding	ENST00000380338	ENST00000380338	4300	GO:0003677	BP	MLLT3 super elongation complex subunit [Source:HGNC Symbol;Acc:HGNC:7136]
ENSG00000265533	7.53404590879813	1.83483100056979	0.773815618085988	2.37114754172085	0.0177329507306763	0.0970905920611695	DSEL-AS1	lncRNA	ENST00000583687	ENST00000583687	643542	NA	NA	DSEL antisense RNA 1 [Source:HGNC Symbol;Acc:HGNC:55325]
ENSG00000269524	14.7400693511745	1.83451638973963	0.647190155401986	2.83458636449772	0.00458850535195648	0.0414318414288604		lncRNA	ENST00000601161	ENST00000601161	NA	NA	NA	novel transcript
ENSG00000118322	76.9748799011363	1.83439945623641	0.380620824249325	4.81949315267836	1.4392339235311e-06	0.00019850441626229	ATP10B	protein_coding	ENST00000642502	ENST00000327245	23120	GO:0000287	MF	ATPase phospholipid transporting 10B (putative) [Source:HGNC Symbol;Acc:HGNC:13543]
ENSG00000010810	8990.71053611045	1.83213215213133	0.509162054918745	3.59832814411851	0.000320269372592552	0.00777772449462664	FYN	protein_coding	ENST00000354650	ENST00000354650	2534	GO:0000304	MF	FYN proto-oncogene, Src family tyrosine kinase [Source:HGNC Symbol;Acc:HGNC:4037]
ENSG00000185567	229.165794046615	1.83047962438348	0.578676199833904	3.16321912826012	0.00156034835541755	0.0213255477198822	AHNAK2	protein_coding	ENST00000555122	ENST00000333244	113146	GO:0005515	MF	AHNAK nucleoprotein 2 [Source:HGNC Symbol;Acc:HGNC:20125]
ENSG00000240853	64.5718096274693	1.82975984750859	0.502100667797725	3.64420914940053	0.000268215250980926	0.00698790649563572	RN7SL328P	misc_RNA	ENST00000484033	ENST00000484033	NA	NA	NA	RNA, 7SL, cytoplasmic 328, pseudogene [Source:HGNC Symbol;Acc:HGNC:46344]
ENSG00000146535	3740.54810982657	1.82937948791333	0.347299094900053	5.26744674770834	1.38334271138787e-07	4.30935105333724e-05	GNA12	protein_coding	ENST00000275364	ENST00000275364	2768	GO:0001701	MF	G protein subunit alpha 12 [Source:HGNC Symbol;Acc:HGNC:4380]
ENSG00000234969	16.2171581812351	1.82921230910923	0.591724291419553	3.09132536154792	0.00199265158731925	0.0248127008130147	AARSD1P1	processed_pseudogene	ENST00000413508	ENST00000413508	NA	NA	NA	AARSD1 pseudogene 1 [Source:HGNC Symbol;Acc:HGNC:54994]
ENSG00000151693	734.941019530093	1.82903459570352	0.50184972839436	3.64458620223908	0.000267822360019206	0.00698270476309814	ASAP2	protein_coding	ENST00000281419	ENST00000281419	8853	GO:0005096	MF	ArfGAP with SH3 domain, ankyrin repeat and PH domain 2 [Source:HGNC Symbol;Acc:HGNC:2721]
ENSG00000232615	6.82995161378561	1.82659822282138	0.52560019677207	3.47526167995994	0.000510355242016233	0.0104134370556175		processed_pseudogene	ENST00000512270	ENST00000512270	NA	NA	NA	protein phosphatase 4, regulatory subunit 2 (PPP4R2) pseudogene
ENSG00000253111	23.2096766256011	1.82633963559698	0.638852240879072	2.85878254584174	0.00425270196475877	0.0395053054494917		lncRNA	ENST00000522815	ENST00000522815	NA	NA	NA	novel transcript
ENSG00000226780	15.5829021997786	1.82541335898216	0.613385031426734	2.97596658779927	0.0029206668093955	0.0312436991783054	AVPR1B-DT	lncRNA	ENST00000425896	ENST00000425896	NA	NA	NA	AVPR1B divergent transcript [Source:HGNC Symbol;Acc:HGNC:55832]
ENSG00000260271	57.3379160926291	1.8246138126997	0.579478541739013	3.14871678806957	0.00163989038822117	0.0219885265561262		lncRNA	ENST00000650187	ENST00000667364	NA	NA	NA	novel transcript
ENSG00000229380	6.50626253593007	1.82363584140681	0.703856242842595	2.59092088754071	0.00957194933552968	0.0656840032640905	PRKAR1B-AS2	lncRNA	ENST00000453149	ENST00000453149	101927000	NA	NA	PRKAR1B antisense RNA 2 [Source:HGNC Symbol;Acc:HGNC:40469]
ENSG00000279071	31.2601565652797	1.82310741578588	0.534082034985915	3.41353443171695	0.000641260549508465	0.0120003061714334		TEC	ENST00000625118	ENST00000625118	NA	NA	NA	novel transcript
ENSG00000144339	131.543349023869	1.822449216714	0.755636770581121	2.41180589360738	0.0158737299283194	0.0906522551584509	TMEFF2	protein_coding	ENST00000392314	ENST00000272771	23671	GO:0003674	BP	transmembrane protein with EGF like and two follistatin like domains 2 [Source:HGNC Symbol;Acc:HGNC:11867]
ENSG00000279106	74.1297935645123	1.82231504287601	0.494634961012357	3.68416142511708	0.000229456797453583	0.00627205055429855		TEC	ENST00000623853	ENST00000623853	NA	NA	NA	TEC
ENSG00000134007	58.862140521172	1.82226789644001	0.593447269978359	3.07064837707731	0.00213594528871659	0.0258314989802753	ADAM20	protein_coding	ENST00000256389	ENST00000256389	8748	GO:0004222	BP	ADAM metallopeptidase domain 20 [Source:HGNC Symbol;Acc:HGNC:199]
ENSG00000227486	1538.81576740064	1.82220874109059	0.432121264622735	4.21689208625609	2.47692433859306e-05	0.00142136032704516		lncRNA	ENST00000452532	ENST00000655874	NA	NA	NA	novel transcript
ENSG00000230054	23.222438424348	1.82214565544217	0.602009984651995	3.0267698242505	0.00247182102050089	0.0283246747948459	TEX53	protein_coding	ENST00000423632	ENST00000423632	105376230	NA	NA	testis expressed 53 [Source:HGNC Symbol;Acc:HGNC:53655]
ENSG00000289395	22.297322279593	1.82142740581784	0.532818402180155	3.41847691139239	0.000629726602791742	0.0118581555593968		lncRNA	ENST00000689893	ENST00000689893	NA	NA	NA	novel transcript, antisense to CAMK1D
ENSG00000271880	45.5277524520376	1.82095461369061	0.712599680451132	2.5553682714786	0.010607550277211	0.070165556803459		lncRNA	ENST00000433214	ENST00000433214	NA	GO:0003924	MF	novel transcript
ENSG00000198049	36.7635707099238	1.82085765303858	0.661341090268715	2.75328068954363	0.00590012860962714	0.0487664792857928	AVPR1B	protein_coding	ENST00000367126	ENST00000367126	553	GO:0001992	BP	arginine vasopressin receptor 1B [Source:HGNC Symbol;Acc:HGNC:896]
ENSG00000288828	70.4791429680319	1.81985899485949	0.72496335814889	2.51027720836304	0.0120636418861675	0.0763319494306684		lncRNA	ENST00000687285	ENST00000687285	NA	NA	NA	novel transcript
ENSG00000183273	26.1296565580733	1.81966223975191	0.465303712061236	3.91069787879198	9.20298286361291e-05	0.00343198130814774	CCDC60	protein_coding	ENST00000536742	ENST00000327554	160777	GO:0005515	MF	coiled-coil domain containing 60 [Source:HGNC Symbol;Acc:HGNC:28610]
ENSG00000264167	17.109921494023	1.8194074566292	0.400912276959787	4.53816847522404	5.67449184539172e-06	0.000523746108937387		lncRNA	ENST00000583598	ENST00000583598	NA	NA	NA	novel transcript
ENSG00000285210	18.6289698777334	1.81751701263495	0.447774126186214	4.05900409680909	4.92824491189217e-05	0.00226285969677428	LINC02795	lncRNA	ENST00000645733	ENST00000645733	NA	NA	NA	long intergenic non-protein coding RNA 2795 [Source:HGNC Symbol;Acc:HGNC:54319]
ENSG00000286953	9.74646727454741	1.81738355094033	0.546833664150668	3.32346684208452	0.000889059913981925	0.0147304305601334		lncRNA	ENST00000659033	ENST00000659033	NA	NA	NA	novel transcript
ENSG00000225096	7.58054669890182	1.81606433248166	0.723687338257994	2.50945986819826	0.0120915954338653	0.0764686546374093		lncRNA	ENST00000641671	ENST00000641775	101927293	NA	NA	novel transcript
ENSG00000171604	1710.7099045265	1.81363097053248	0.371017379871788	4.88826418632791	1.01728955929333e-06	0.000156218546106867	CXXC5	protein_coding	ENST00000502295	ENST00000302517	51523	GO:0000122	BP	CXXC finger protein 5 [Source:HGNC Symbol;Acc:HGNC:26943]
ENSG00000205710	306.823107301417	1.81323552515338	0.745386175406781	2.43261222837121	0.0149903451728076	0.0875389646355163	C17orf107	protein_coding	ENST00000521575	ENST00000381365	100130311	NA	NA	chromosome 17 open reading frame 107 [Source:HGNC Symbol;Acc:HGNC:37238]
ENSG00000102383	197.253642603426	1.81297134448848	0.6717137510177	2.69902371619113	0.0069543220240542	0.0542650357722355	ZDHHC15	protein_coding	ENST00000373367	ENST00000373367	158866	GO:0000139	CC	zinc finger DHHC-type palmitoyltransferase 15 [Source:HGNC Symbol;Acc:HGNC:20342]
ENSG00000123094	255.153696387668	1.81224541005802	0.531951545832536	3.40678662230738	0.000657324932780252	0.0122054515658044	RASSF8	protein_coding	ENST00000688511	ENST00000689635	11228	GO:0007165	BP	Ras association domain family member 8 [Source:HGNC Symbol;Acc:HGNC:13232]
ENSG00000250461	53.4903836218807	1.80960156686301	0.652828546749148	2.77194000763934	0.00557233052736104	0.0469274645024709		processed_pseudogene	ENST00000439448	ENST00000439448	NA	NA	NA	family with sequence similarity 133, member B (FAM133B) pseudogene
ENSG00000179270	3.62762528978477	1.80942845926496	0.746680681322281	2.42329620214719	0.0153803803599604	0.0888119886045906	PCARE	protein_coding	ENST00000602958	ENST00000331664	388939	GO:0001750	CC	photoreceptor cilium actin regulator [Source:HGNC Symbol;Acc:HGNC:34383]
ENSG00000214851	187.442288411052	1.80781195983591	0.628626588062423	2.87581211830065	0.00402989504230828	0.0380319371242758	LINC00612	lncRNA	ENST00000538094	ENST00000538094	253128	NA	NA	long intergenic non-protein coding RNA 612 [Source:HGNC Symbol;Acc:HGNC:28621]
ENSG00000224706	37.0183954129343	1.80767812701566	0.428323457113442	4.22035752885908	2.43915169056464e-05	0.00140576053413467	RPS17P13	processed_pseudogene	ENST00000448974	ENST00000448974	NA	NA	NA	ribosomal protein S17 pseudogene 13 [Source:HGNC Symbol;Acc:HGNC:36664]
ENSG00000224596	260.178045030868	1.80763696096689	0.350946717208314	5.15074474936296	2.59454102153044e-07	6.58105220325693e-05	ZMIZ1-AS1	lncRNA	ENST00000428862	ENST00000456353	NA	NA	NA	ZMIZ1 antisense RNA 1 [Source:HGNC Symbol;Acc:HGNC:27433]
ENSG00000280254	80.9680169788769	1.80750837337768	0.656030099630786	2.75522171070345	0.0058652375952225	0.0485669628187351		TEC	ENST00000623798	ENST00000623798	NA	NA	NA	TEC
ENSG00000076604	373.590370909784	1.805965554556	0.442025626001746	4.08565804406296	4.39520706033131e-05	0.00213229442742709	TRAF4	protein_coding	ENST00000262395	ENST00000262395	9618	GO:0001650	BP	TNF receptor associated factor 4 [Source:HGNC Symbol;Acc:HGNC:12034]
ENSG00000290787	47.3803246977095	1.80556253298441	0.705749020221357	2.55836349927641	0.0105166098445117	0.0698067989238197		lncRNA	ENST00000605733	ENST00000605733	NA	NA	NA	novel transcript
ENSG00000188859	51.420300219963	1.80452484269802	0.703757273795544	2.56412957974239	0.0103434920484353	0.0691019465080899	FAM78B	protein_coding	ENST00000435676	ENST00000354422	149297	NA	NA	family with sequence similarity 78 member B [Source:HGNC Symbol;Acc:HGNC:13495]
ENSG00000291187	17.4828375449083	1.80298885158078	0.585726567941316	3.07820910005473	0.00208248736664035	0.0254232309057147	LINC00032	lncRNA	ENST00000640190	ENST00000640190	158035	NA	NA	long intergenic non-protein coding RNA 32 [Source:HGNC Symbol;Acc:HGNC:16506]
ENSG00000106665	2057.16824746619	1.80256659538695	0.648779275871356	2.77839731080494	0.00546277770928877	0.0463429289623414	CLIP2	protein_coding	ENST00000223398	ENST00000223398	7461	GO:0005634	BP	CAP-Gly domain containing linker protein 2 [Source:HGNC Symbol;Acc:HGNC:2586]
ENSG00000231047	32.3332191804159	1.80238907872839	0.742505341398779	2.42744257614758	0.0152056937960965	0.0882302265577091	GCNT1P3	processed_pseudogene	ENST00000450607	ENST00000450607	NA	NA	NA	glucosaminyl (N-acetyl) transferase 1 pseudogene 3 [Source:HGNC Symbol;Acc:HGNC:37973]
ENSG00000288863	21.0288429693068	1.80165622388373	0.407302459247716	4.42338655949039	9.71656613425607e-06	0.000742321001749424		lncRNA	ENST00000693216	ENST00000693216	NA	NA	NA	novel transcript, sense intronic to PLBD2
ENSG00000251785	5.22479162070922	1.80124185931606	0.650790670291819	2.76777455722955	0.00564404829189002	0.0472223498670382	RNA5SP20	rRNA_pseudogene	ENST00000515976	ENST00000515976	NA	NA	NA	RNA, 5S ribosomal pseudogene 20 [Source:HGNC Symbol;Acc:HGNC:42588]
ENSG00000249069	44.9835100039257	1.79911265284559	0.534144505680847	3.36821334622239	0.000756570260442689	0.0132330217479947	LINC01033	lncRNA	ENST00000523194	ENST00000655801	NA	NA	NA	long intergenic non-protein coding RNA 1033 [Source:HGNC Symbol;Acc:HGNC:49019]
ENSG00000133315	978.890241118957	1.79909879506207	0.320345351560949	5.61612268227273	1.95290026935063e-08	1.05107350058492e-05	MACROD1	protein_coding	ENST00000255681	ENST00000255681	28992	GO:0005515	MF	mono-ADP ribosylhydrolase 1 [Source:HGNC Symbol;Acc:HGNC:29598]
ENSG00000270409	95.3928422018121	1.79861104348742	0.630910151701642	2.85081962722639	0.00436066984603094	0.0402290440531463		transcribed_unprocessed_pseudogene	ENST00000604625	ENST00000604625	NA	NA	NA	chromosome 9 open reading frame 64 (C9orf64) pseudogene
ENSG00000172889	1182.34832608685	1.79842799905694	0.44480973585189	4.04313991826783	5.2740126084848e-05	0.00234706551256412	EGFL7	protein_coding	ENST00000371699	ENST00000308874	51162	GO:0001525	BP	EGF like domain multiple 7 [Source:HGNC Symbol;Acc:HGNC:20594]
ENSG00000289466	12.2708265933775	1.79534649916634	0.716932414916635	2.50420606156454	0.0122726533816904	0.0772083221797989		TEC	ENST00000688641	ENST00000688641	NA	NA	NA	TEC
ENSG00000282133	12.1777295175635	1.79450500290508	0.762589970369096	2.35317152418951	0.0186140455681554	0.0999609378289292	TRBJ1-3	TR_J_gene	ENST00000633780	ENST00000633780	NA	GO:0002250	BP	T cell receptor beta joining 1-3 [Source:HGNC Symbol;Acc:HGNC:12164]
ENSG00000274308	6.83035536859895	1.79440133185382	0.629588163873535	2.8501192284394	0.00437028432974804	0.0402663423099886		processed_pseudogene	ENST00000610837	ENST00000610837	NA	NA	NA	ribosomal protein S2 (RPS2) pseudogene
ENSG00000232053	296.521382391292	1.79439537557751	0.691816981310961	2.59374288872935	0.00949374541429788	0.0653210175725568		lncRNA	ENST00000657456	ENST00000668062	NA	NA	NA	novel transcript
ENSG00000200138	8.59500025074784	1.79423373119552	0.647500116778175	2.77101684571618	0.00558815356885816	0.0469601758051641	RNY1P10	misc_RNA	ENST00000363268	ENST00000363268	NA	NA	NA	RNY1 pseudogene 10 [Source:HGNC Symbol;Acc:HGNC:50873]
ENSG00000183463	91.1524586689677	1.79224275368498	0.521763345347361	3.43497252090754	0.000592613917538487	0.0113366637618133	URAD	protein_coding	ENST00000332715	ENST00000332715	646625	GO:0000255	BP	ureidoimidazoline (2-oxo-4-hydroxy-4-carboxy-5-) decarboxylase [Source:HGNC Symbol;Acc:HGNC:17785]
ENSG00000279175	139.686961505865	1.79205170544902	0.401945056178067	4.45844942711553	8.25546688355786e-06	0.000671890881315871		lncRNA	ENST00000623440	ENST00000623440	NA	NA	NA	novel transcript, antisense to PARVB
ENSG00000226205	20.2007071808247	1.7915181748219	0.555950550595254	3.22244158748242	0.00127103078883149	0.0187163686166319	RPS3AP27	processed_pseudogene	ENST00000439081	ENST00000439081	NA	NA	NA	RPS3A pseudogene 27 [Source:HGNC Symbol;Acc:HGNC:35978]
ENSG00000287682	95.711895632517	1.79131612297471	0.754945683128087	2.37277484063815	0.017655022676015	0.0968988304101576		lncRNA	ENST00000657494	ENST00000657494	NA	NA	NA	novel transcript
ENSG00000235081	25.1257304379236	1.7905403340329	0.640208772918555	2.79680693201104	0.00516103636908067	0.0446277124271594		processed_pseudogene	ENST00000450182	ENST00000450182	NA	NA	NA	novel pseudogene
ENSG00000177679	5.37193875894561	1.78992141136675	0.693048327247837	2.5826790730088	0.00980364703348501	0.0667416332332356	SRRM3	protein_coding	ENST00000611745	ENST00000611745	222183	GO:0003729	MF	serine/arginine repetitive matrix 3 [Source:HGNC Symbol;Acc:HGNC:26729]
ENSG00000275927	35.7604945346131	1.78851240800893	0.431090634603566	4.14880831186151	3.34210510649877e-05	0.00176564780889531		lncRNA	ENST00000618290	ENST00000618290	NA	NA	NA	novel transcript, sense intronic to XYLT1
ENSG00000118491	40.0906133188471	1.7883088848789	0.557305995545776	3.20884558783113	0.00133269043167561	0.0192941111534574	ZC2HC1B	protein_coding	ENST00000539295	ENST00000237275	153918	GO:0005515	MF	zinc finger C2HC-type containing 1B [Source:HGNC Symbol;Acc:HGNC:21174]
ENSG00000229424	34.8226537034325	1.78811205369205	0.483129645010234	3.7011019136575	0.000214665230553561	0.00601026286483919		lncRNA	ENST00000419326	ENST00000419326	NA	NA	NA	novel transcript
ENSG00000223549	12.4053710297762	1.78626439745109	0.513965015110329	3.47545911674094	0.000509979719875789	0.0104116537612607	MTND5P28	processed_pseudogene	ENST00000438005	ENST00000438005	NA	NA	NA	MT-ND5 pseudogene 28 [Source:HGNC Symbol;Acc:HGNC:42290]
ENSG00000162944	142.626706177941	1.78548216447978	0.722195927813122	2.47229608436923	0.0134248277415778	0.0815435638690059	RFTN2	protein_coding	ENST00000295049	ENST00000295049	130132	GO:0005515	MF	raftlin family member 2 [Source:HGNC Symbol;Acc:HGNC:26402]
ENSG00000234584	41.9099896030586	1.7851537753273	0.500779235010144	3.56475199154601	0.00036420040004708	0.00842137991137434		lncRNA	ENST00000447019	ENST00000447019	NA	NA	NA	novel transcript
ENSG00000279021	192.137309840203	1.78452539121888	0.433394530936153	4.11755401565456	3.82914799177105e-05	0.00192180683098109		TEC	ENST00000624764	ENST00000624764	NA	NA	NA	novel transcript
ENSG00000275993	193.073077027266	1.78334514144265	0.651078175614886	2.73906453669475	0.00616142773925747	0.0501801561383385		artifact	ENST00000613488	ENST00000613488	102724428	GO:0000287	MF	novel protein, similar to salt-inducible kinase 1 SIK1
ENSG00000255390	24.9315684888689	1.78218661167546	0.743167362593151	2.39809590864814	0.0164805494202981	0.0928217360124499	DCHS1-AS1	lncRNA	ENST00000526456	ENST00000526456	NA	NA	NA	DCHS1 antisense RNA 1 [Source:HGNC Symbol;Acc:HGNC:40650]
ENSG00000229331	11.8644240006887	1.7814407220683	0.696835014559334	2.55647417946535	0.0105738918232087	0.0700198194838683	GK-IT1	lncRNA	ENST00000441146	ENST00000441146	NA	NA	NA	GK intronic transcript 1 [Source:HGNC Symbol;Acc:HGNC:41339]
ENSG00000145687	12541.7549486238	1.78116796438863	0.435793028309391	4.08718783615805	4.36633595553208e-05	0.00212677665188387	SSBP2	protein_coding	ENST00000320672	ENST00000615665	23635	GO:0003697	MF	single stranded DNA binding protein 2 [Source:HGNC Symbol;Acc:HGNC:15831]
ENSG00000289888	20.5491193829359	1.78092858194293	0.550702847639186	3.23391932614406	0.00122103941340769	0.0182102683627323		lncRNA	ENST00000701357	ENST00000701357	NA	NA	NA	novel transcript, sense intronic to MTMR3
ENSG00000156689	8.04394961711853	1.78083321373249	0.679479870507587	2.62087707234383	0.00877038800816235	0.0625225371992414	GLYATL2	protein_coding	ENST00000287275	ENST00000287275	219970	GO:0005739	BP	glycine-N-acyltransferase like 2 [Source:HGNC Symbol;Acc:HGNC:24178]
ENSG00000229531	124.608335716495	1.78069979114482	0.401800946430592	4.43179591029763	9.34514512047631e-06	0.0007270041034511	RABGAP1L-AS1	lncRNA	ENST00000452442	ENST00000452442	101928696	NA	NA	RABGAP1L antisense RNA 1 [Source:HGNC Symbol;Acc:HGNC:41057]
ENSG00000168702	74.1276407931174	1.78003355471382	0.644031347956815	2.76389272100025	0.00571163143154348	0.0476443936773442	LRP1B	protein_coding	ENST00000389484	ENST00000389484	53353	GO:0005041	MF	LDL receptor related protein 1B [Source:HGNC Symbol;Acc:HGNC:6693]
ENSG00000260417	211.366132761395	1.77851276506729	0.427659769362197	4.15870954548688	3.20050552255807e-05	0.00171538500278383		lncRNA	ENST00000567093	ENST00000567093	NA	NA	NA	novel transcript
ENSG00000236760	18.6591112534857	1.77758584669639	0.617773805101381	2.87740566533842	0.00400959774558591	0.0379096871100189		lncRNA	ENST00000425776	ENST00000419347	NA	NA	NA	novel transcript
ENSG00000274197	9.63054403170751	1.77715118851477	0.565657275690254	3.14174547891418	0.00167943959057422	0.0223279850596833	U4	snRNA	ENST00000618561	ENST00000618561	NA	NA	NA	U4 spliceosomal RNA [Source:RFAM;Acc:RF00015]
ENSG00000255040	59.2584328248028	1.77630383683557	0.553777137017126	3.20761497378437	0.00133840550435908	0.0193476395410744	MORF4L1P3	processed_pseudogene	ENST00000525966	ENST00000525966	NA	NA	NA	mortality factor 4 like 1 pseudogene 3 [Source:HGNC Symbol;Acc:HGNC:20402]
ENSG00000276105	13.1971049304361	1.77604432014153	0.471587125349879	3.76610010042969	0.00016581733308268	0.00506935291732296		misc_RNA	ENST00000619507	ENST00000619507	NA	NA	NA	NULL
ENSG00000285835	71.9997731448062	1.77529830541898	0.652614531581562	2.72028620189729	0.00652254354468687	0.0520420917489081		lncRNA	ENST00000649399	ENST00000649399	NA	NA	NA	novel transcript
ENSG00000215022	2251.44158415218	1.77509393727606	0.360875666822504	4.91885183865595	8.70533288412358e-07	0.000140435673705665		lncRNA	ENST00000606627	ENST00000606150	100130357	NA	NA	novel transcript, antisense to PHACTR1
[truncated: 5,064 more rows]
