# Supplementary material for: RUNX1A isoform is overexpressed in acute myeloid leukemia and is associated with FLT3 internal tandem duplications
Source: Research Square preprint supplement (doi:10.21203/rs.3.rs-5733882/v1), 2025-01-01
Supplement: Supplementary file 2 [file c1bbb2a2d8a36eb2dc59a167.docx]

|  | **AML (n=138)** |
| --- | --- |
| **Sex, M/F (%)** | 91/47 (66/34) |
| **Median age, years (range)** | 60 (19-86) |
| **ND-AML/s-AML (%)** | 124/14 (90/10) |
| **Median WBC/uL (range)** | 11550 (680-460600) |
| **Median Hb g/dL (range)** | 8.65 (3.0-13.2) |
| **Median PLT/uL (range)** | 65100 (2900-637000) |
| **Median BM blasts, % (range)** | 65 (20-95) |
| **TX, 1/+1 (%)** | 84/54 (61/39) |
| **HSCT, Y/N (%)** | 29/109 (21/79) |
| **Median OS, months (range)** | 13 (1-279) |
| **Relapse, Yes/No (%)** | 21/117 (15/85) |

**Supplementary table 1.** AML patients main biological and clinical characteristics.

AML: acute myeloid leukemia, ND-AML: newly diagnosed AML, s-AML: secondary AML, WBC: white blood cells, Hb: hemoglobin, PLT: platelets, BM: bone marrow, TX: therapies, HSCT: hematopoietic stem cells transplant, OS: overall survival.
