# Supplementary material for: RUNX1A isoform is overexpressed in acute myeloid leukemia and is associated with FLT3 internal tandem duplications
Source: Research Square preprint supplement (doi:10.21203/rs.3.rs-5733882/v1), 2025-01-01
Supplement: Supplementary file 3 [file d9327c0f989aa50c92a45586.docx]

| **Variable** | **Estimate** | **Standard error** | **95% CI (asymptotic)** | **|t|** | **P value** | **P value summary** |
| --- | --- | --- | --- | --- | --- | --- |
|  |  |  |  |  |  |  |
| *TP53* | 0,03364 | 0,06053 | -0,08890 to 0,1562 | 0,5558 | 0,5816 | ns |
| *NPM1* | 0,09103 | 0,04904 | -0,008248 to 0,1903 | 1,856 | 0,0712 | ns |
| ***FLT3-*ITD** | **0,1702** | **0,04464** | **0,07985 to 0,2606** | **3,813** | **0,0005** | ******* |
| *FLT3-*TKD | -0,03859 | 0,04343 | -0,1265 to 0,04932 | 0,8886 | 0,3798 | ns |
| *CEBPA* | 0,003151 | 0,08541 | -0,1697 to 0,1760 | 0,03689 | 0,9708 | ns |
| *DNMT3A* | -0,06662 | 0,05179 | -0,1715 to 0,03822 | 1,286 | 0,2061 | ns |
| *TET2* | 0,01967 | 0,04734 | -0,07616 to 0,1155 | 0,4155 | 0,6801 | ns |
| *IDH2* | 0,03078 | 0,04866 | -0,06774 to 0,1293 | 0,6324 | 0,5309 | ns |
| *EZH2* | -0,03186 | 0,08411 | -0,2021 to 0,1384 | 0,3788 | 0,7069 | ns |
| *ASXL1* | -0,008320 | 0,04464 | -0,09869 to 0,08205 | 0,1864 | 0,8531 | ns |
| *RUNX1* | 4,410e-005 | 0,04381 | -0,08865 to 0,08873 | 0,001006 | 0,9992 | ns |
| *SRSF2* | 0,01477 | 0,06031 | -0,1073 to 0,1369 | 0,2450 | 0,8078 | ns |
| *SF3B1* | -0,01782 | 0,08413 | -0,1881 to 0,1525 | 0,2118 | 0,8334 | ns |
| *U2AF1* | 0,04929 | 0,06732 | -0,08700 to 0,1856 | 0,7321 | 0,4686 | ns |
| *ETV6* | -0,02557 | 0,06787 | -0,1630 to 0,1118 | 0,3768 | 0,7084 | ns |
| *CBL* | -0,01155 | 0,08758 | -0,1888 to 0,1657 | 0,1319 | 0,8957 | ns |
| *NRAS* | -0,03961 | 0,04212 | -0,1249 to 0,04567 | 0,9403 | 0,3530 | ns |
| *GATA2* | -0,002937 | 0,08373 | -0,1724 to 0,1666 | 0,03508 | 0,9722 | ns |

**Supplementary table 2.** Multiple linear regression tabular results. Between 18 indipendent variables (gene mutations detected) tested, *FLT3*-ITD is the only variable able to influence the *RUNX1A* levels (dependent variable).
