# Supplementary material for: RUNX1A isoform is overexpressed in acute myeloid leukemia and is associated with FLT3 internal tandem duplications
Source: Research Square preprint supplement (doi:10.21203/rs.3.rs-5733882/v1), 2025-01-01
Supplement: Supplementary file 4 [file dacfa79ea3a7996496d5274b.xlsx]

## Sheet: GO_BP padj<0.05
Category	Term	Count	%	PValue	Genes	List Total	Pop Hits	Pop Total	Fold Enrichment	Bonferroni	Benjamini	FDR
GOTERM_BP_DIRECT	GO:0007165~signal transduction	77	10.4336	7.00295e-07	BCAR3, ALK, GPI, CD83, SCT, PTPRM, METRNL, SHB, AKAP12, GPR173, FGF9, NAMPT, CLEC5A, RAC2, PGLYRP1, ICOSLG, OR1B1, PRKCH, IL15, PRKCE, CLEC11A, ANK3, OLFM4, MOB3B, VAV2, INPP4B, GPRC5A, TRAF4, CEACAM6, CEACAM5, IL1B, IL1RAPL1, PSG6, ITPKA, CNGB3, CEACAM8, PRKD1, PLCB1, DOCK1, PDE9A, TNFRSF21, HBEGF, TAMALIN, LRRC18, SRC, CHRNA6, NPR3, ITPR1, RASAL1, THBS4, KNG1, ARHGAP22, RASD2, RASD1, CHN2, GNA1…	681	1240	19734	1.79944	0.0021469	0.00208017	0.00206729
GOTERM_BP_DIRECT	GO:0006959~humoral immune response	13	1.76152	1.3556e-06	GPI, MEF2C, CD83, JCHAIN, IL6, GPR183, BLNK, IFNK, BCL2, PDCD1, TNFRSF21, HLA-DRB1, LTF	681	63	19734	5.97958	0.00415169	0.00208017	0.00206729
GOTERM_BP_DIRECT	GO:0050778~positive regulation of immune response	10	1.35501	3.40059e-06	HLA-DMA, HLA-DRB5, IL15, HLA-DPB1, CTSG, HLA-DOA, HLA-DRB1, ELANE, HLA-DQA1, HLA-DPA1	681	37	19734	7.83188	0.0103821	0.0034788	0.00345726
GOTERM_BP_DIRECT	GO:0007399~nervous system development	34	4.60705	7.6025e-06	SEMA5A, CHODL, GPSM1, PCDHGB2, EFNA5, CYP46A1, CPLX2, EFNB3, DPYSL4, IGF2BP3, IGF2BP2, N4BP3, MEF2C, RBFOX1, CAMK1D, PCDHGA5, PCDHGA4, PCDHGA3, PCDHGA2, PCDHGA1, PCDHB15, PAX3, CABLES1, ARHGAP26, MYT1, FGF17, NRG3, MAB21L2, PCDHGB1, TCF4, PRKD1, IGSF9B, FGF12, NGEF	681	414	19734	2.37983	0.0230621	0.00446206	0.00443444
GOTERM_BP_DIRECT	GO:0043410~positive regulation of MAPK cascade	21	2.84553	8.1964e-06	BCAR3, MEF2C, AVPR1B, PDE6H, FLT3, EGF, HGF, PRKCE, LIF, OSM, PDGFA, LPAR3, ADRA1D, INAVA, FGF17, IL6, EPGN, FGF9, DOK6, HLA-DRB1, FGFR1	681	188	19734	3.2369	0.0248411	0.00446206	0.00443444
GOTERM_BP_DIRECT	GO:0002503~peptide antigen assembly with MHC class II protein complex	7	0.948509	9.75626e-06	HLA-DMA, HLA-DRB5, HLA-DPB1, HLA-DOA, HLA-DRB1, HLA-DQA1, HLA-DPA1	681	16	19734	12.6779	0.0294983	0.00446206	0.00443444
GOTERM_BP_DIRECT	GO:0001525~angiogenesis	25	3.38753	1.01774e-05	CALCRL, NPR3, CXCL17, PDGFA, PTGS2, SHB, ARHGAP22, SRPX2, FGF9, HOXA3, EPHB1, VAV3, EGFL7, GPR15, ANGPT1, EGF, TIE1, PTK2, VAV2, EPGN, MEIS1, KLF5, PRKD1, RAMP1, FGFR1	681	257	19734	2.81887	0.0307518	0.00446206	0.00443444
GOTERM_BP_DIRECT	GO:0008284~positive regulation of cell population proliferation	38	5.14905	1.51994e-05	BCAR3, CD86, FLT3, PDGFA, ADRA1D, PKHD1, DPP4, FGF9, BCL7A, NAMPT, MARCKSL1, CAV3, IL15, EGF, CLEC11A, LIF, OSM, AVPR1A, PTK2, DYNAP, FGF17, MAS1, SFRP1, EPGN, IL6, MEIS1, SFRP2, CEACAM6, NRG4, IL1B, MAB21L2, BCL2, S100P, PRTN3, CALR, ATF3, FGFR1, HBEGF	681	506	19734	2.17621	0.0455761	0.00583087	0.00579477
GOTERM_BP_DIRECT	GO:0007156~homophilic cell adhesion via plasma membrane adhesion molecules	20	2.71003	2.62764e-05	KIRREL3, PCDHGA5, PCDHGA4, MUSK, PCDHGA3, PCDHGA2, PCDHGB2, PCDHGA1, PCDHB15, PTPRM, PRTG, IGSF11, CEACAM6, CEACAM5, PCDHGB1, CDH24, DCHS1, EMB, NECTIN4, SDK2	681	187	19734	3.09925	0.0774774	0.00896026	0.00890479
GOTERM_BP_DIRECT	GO:0050731~positive regulation of peptidyl-tyrosine phosphorylation	13	1.76152	2.96701e-05	ACVR1, YES1, ANGPT1, IL15, SRC, EGF, LIF, OSM, EFNA5, THBS4, IL6, IL5, HBEGF	681	84	19734	4.48469	0.0870362	0.00910577	0.00904939
GOTERM_BP_DIRECT	GO:0002504~antigen processing and presentation of peptide or polysaccharide antigen via MHC class II	7	0.948509	4.19639e-05	HLA-DMA, HLA-DRB5, HLA-DPB1, HLA-DOA, HLA-DRB1, HLA-DQA1, HLA-DPA1	681	20	19734	10.1423	0.120841	0.0107323	0.0106658
GOTERM_BP_DIRECT	GO:0038096~Fc-gamma receptor signaling pathway involved in phagocytosis	7	0.948509	4.19639e-05	VAV3, YES1, SRC, PRKCE, FYN, PTK2, VAV2	681	20	19734	10.1423	0.120841	0.0107323	0.0106658
GOTERM_BP_DIRECT	GO:0048013~ephrin receptor signaling pathway	10	1.35501	5.40584e-05	YES1, SIPA1L1, EFNB3, SRC, FYN, EFNA5, MMP9, EPHB1, PTK2, NGEF	681	51	19734	5.68196	0.152877	0.0127619	0.0126829
GOTERM_BP_DIRECT	GO:0007155~cell adhesion	36	4.87805	0.000121667	SEMA5A, ITGAM, SRC, LAMA3, PCDHGB2, PTPRM, FPR2, THBS4, DPP4, PDZD2, FLRT1, ITGB8, EGFL7, SIGLEC14, PCDHGA5, MUC16, PCDHGA4, MOG, PCDHGA3, PRKCE, PCDHGA2, PCDHGA1, PCDHB15, OLFM4, GRHL2, MAG, PPFIBP1, MMRN1, ASTL, ANOS1, PCDHGB1, IGSF9B, FOLR3, CD24, SIGLEC5, FREM3	681	517	19734	2.01781	0.311623	0.0266711	0.026506
GOTERM_BP_DIRECT	GO:0019882~antigen processing and presentation	9	1.21951	0.000132984	HLA-DMA, HLA-DRB5, RAB5B, HLA-DPB1, GBA1, HLA-DRB1, RAB33A, HLA-DQA1, HLA-DPA1	681	45	19734	5.79559	0.335125	0.0272086	0.0270402
GOTERM_BP_DIRECT	GO:0098609~cell-cell adhesion	20	2.71003	0.000172634	ROPN1B, KIRREL3, CSTA, ITGAM, NEGR1, SRC, LAMA3, CLDN2, PKHD1, PDLIM1, PRTG, SRPX2, BCL2, ITGB8, CDH24, IGSF9B, CD24, S100A11, SDK2, CD200	681	215	19734	2.69563	0.411313	0.0331134	0.0329084
GOTERM_BP_DIRECT	GO:0033138~positive regulation of peptidyl-serine phosphorylation	11	1.49051	0.000193552	BCAR3, IL6, SFRP2, ANGPT1, OSM, BCL2, LIF, SMYD3, PRKD1, PTGS2, SNCA	681	73	19734	4.36654	0.447924	0.0349419	0.0347256
GOTERM_BP_DIRECT	GO:0051092~positive regulation of NF-kappaB transcription factor activity	15	2.03252	0.000277357	ALK, EDA, PRKCH, NLRC4, IL1B, TRIM58, S100A12, TRIM15, PRKCQ, PRKD1, S100A9, S100A8, CARD11, HSPA1A, LTF	681	137	19734	3.17277	0.573151	0.0449042	0.0446262
GOTERM_BP_DIRECT	GO:0050870~positive regulation of T cell activation	8	1.08401	0.000277999	HLA-DMA, HLA-DRB5, HLA-DPB1, PRKCQ, HLA-DOA, HLA-DRB1, HLA-DQA1, HLA-DPA1	681	38	19734	6.10063	0.573993	0.0449042	0.0446262
GOTERM_BP_DIRECT	GO:0019730~antimicrobial humoral response	5	0.677507	0.000554505	DEFA4, PRTN3, AZU1, LYZ, PRSS2	681	12	19734	12.0742	0.817726	0.0805043	0.0800059
GOTERM_BP_DIRECT	GO:0043406~positive regulation of MAP kinase activity	9	1.21951	0.000555119	EPGN, FLT3, EGF, IL1B, PDGFA, S100A12, CD24, ELANE, FGFR1	681	55	19734	4.74185	0.81807	0.0805043	0.0800059
GOTERM_BP_DIRECT	GO:0019886~antigen processing and presentation of exogenous peptide antigen via MHC class II	7	0.948509	0.000577092	HLA-DMA, HLA-DRB5, HLA-DPB1, HLA-DOA, HLA-DRB1, HLA-DQA1, HLA-DPA1	681	31	19734	6.54341	0.82994	0.0805043	0.0800059
GOTERM_BP_DIRECT	GO:0031295~T cell costimulation	8	1.08401	0.000611542	DPP4, CD86, YES1, EFNB3, SRC, FYN, CD24, CARD11	681	43	19734	5.39125	0.847012	0.081601	0.0810958
GOTERM_BP_DIRECT	GO:0051897~positive regulation of phosphatidylinositol 3-kinase/protein kinase B signal transduction	17	2.30352	0.00103288	SEMA5A, VAV3, MUSK, ANGPT1, FLT3, SRC, EGF, HGF, OSM, PDGFA, PTK2, VAV2, RASD2, PRKD1, HCST, HBEGF, FGFR1	681	192	19734	2.56576	0.958061	0.132079	0.131261
GOTERM_BP_DIRECT	GO:0048167~regulation of synaptic plasticity	9	1.21951	0.00138767	MEF2C, HRH1, SIPA1L1, P2RX3, SCT, MAP1A, ITPKA, GRIN2B, GRIN1	681	63	19734	4.13971	0.985902	0.17035	0.169295
GOTERM_BP_DIRECT	GO:0045669~positive regulation of osteoblast differentiation	10	1.35501	0.00155548	ACVR1, SMAD1, MEF2C, IL6, SFRP2, HGF, LRP3, PRKD1, ACVR2A, LTF	681	79	19734	3.6681	0.991583	0.183606	0.182469
GOTERM_BP_DIRECT	GO:0046718~symbiont entry into host cell	11	1.49051	0.00292666	DPP4, CD86, GPR15, EFNB3, MOG, AVPR1B, CLEC5A, NECTIN4, HAVCR1, TNFRSF4, HSPA1A	681	103	19734	3.09474	0.999876	0.332664	0.330605
GOTERM_BP_DIRECT	GO:0006954~inflammatory response	27	3.65854	0.00325826	SEMA7A, NLRC4, FPR2, HDAC9, CXCL2, FUT4, KNG1, HRH1, BLNK, S100A12, TNFRSF4, SMAD1, CAMK1D, CYBB, NKG7, TACR1, AZU1, LYZ, NR4A1, IL6, IL5, IL1B, PLP1, PRKCQ, PRKD1, S100A9, S100A8	681	422	19734	1.85404	0.999955	0.350612	0.348441
GOTERM_BP_DIRECT	GO:0007173~epidermal growth factor receptor signaling pathway	8	1.08401	0.00331305	BCAR3, EPGN, NRG4, SRC, EGF, PTK2, FAM83B, HBEGF	681	57	19734	4.06708	0.999962	0.350612	0.348441
GOTERM_BP_DIRECT	GO:2000811~negative regulation of anoikis	5	0.677507	0.0035834	CEACAM6, SRC, CEACAM5, BCL2, PTK2	681	19	19734	7.62578	0.999984	0.366582	0.364312
GOTERM_BP_DIRECT	GO:0048010~vascular endothelial growth factor receptor signaling pathway	6	0.813008	0.00386685	FGF9, SRC, FYN, PRKD1, PTK2, VAV2	681	31	19734	5.60864	0.999993	0.370855	0.368559
GOTERM_BP_DIRECT	GO:0045907~positive regulation of vasoconstriction	6	0.813008	0.00386685	HRH1, AVPR1B, ADRA1D, TACR1, AVPR1A, PTGS2	681	31	19734	5.60864	0.999993	0.370855	0.368559
GOTERM_BP_DIRECT	GO:0150077~regulation of neuroinflammatory response	4	0.542005	0.0040773	IL6, PTGS2, MMP9, CD200	681	10	19734	11.5912	0.999996	0.379189	0.376842
GOTERM_BP_DIRECT	GO:0072659~protein localization to plasma membrane	14	1.89702	0.00429976	DPP10, CAV3, MAST4, ANK3, ATP2C2, EFR3B, NKD2, EHD2, DPP6, TSPAN5, DCHS1, TNIK, RAMP1, PACSIN1	681	163	19734	2.48891	0.999998	0.388116	0.385713
GOTERM_BP_DIRECT	GO:0008015~blood circulation	6	0.813008	0.0044552	GUCY1A1, IMMP2L, HTR7, GUCY1B1, AVPR1A, F5	681	32	19734	5.43337	0.999999	0.390657	0.388239
GOTERM_BP_DIRECT	GO:0030890~positive regulation of B cell proliferation	7	0.948509	0.00474495	VAV3, MEF2C, IL5, GPR183, BCL2, TNFRSF4, CARD11	681	46	19734	4.40969	1	0.40178	0.399293
GOTERM_BP_DIRECT	GO:0007169~cell surface receptor protein tyrosine kinase signaling pathway	11	1.49051	0.00501053	ALK, YES1, MUSK, FLT3, SRC, TIE1, DOK6, BLNK, FYN, SAMD12, FGFR1	681	111	19734	2.87169	1	0.40178	0.399293
GOTERM_BP_DIRECT	GO:0030225~macrophage differentiation	6	0.813008	0.00510455	IL15, CEBPE, ZBTB46, LIF, MMP9, HLA-DRB1	681	33	19734	5.26872	1	0.40178	0.399293
GOTERM_BP_DIRECT	GO:0007596~blood coagulation	10	1.35501	0.00510571	F7, ANXA8L1, PROC, MMRN1, GNA12, CYP4F3, ANXA8, CD59, KNG1, F5	681	94	19734	3.08276	1	0.40178	0.399293
GOTERM_BP_DIRECT	GO:0043087~regulation of GTPase activity	8	1.08401	0.00531824	VAV3, SIPA1L1, CHN2, EFNA5, PLXNA4, PTK2, NGEF, VAV2	681	62	19734	3.73909	1	0.408042	0.405516
GOTERM_BP_DIRECT	GO:0050829~defense response to Gram-negative bacterium	10	1.35501	0.00547249	IL6, DEFA4, CTSG, SSC5D, BPI, PRKD1, RNASE3, AZU1, LYZ, LTF	681	95	19734	3.05031	1	0.409636	0.4071
GOTERM_BP_DIRECT	GO:0022407~regulation of cell-cell adhesion	4	0.542005	0.00710022	PKHD1, SRC, CD24, EFNA5	681	12	19734	9.65932	1	0.501183	0.498081
GOTERM_BP_DIRECT	GO:0048583~regulation of response to stimulus	4	0.542005	0.00710022	VAV3, TRAF4, MMRN1, DAPK1	681	12	19734	9.65932	1	0.501183	0.498081
GOTERM_BP_DIRECT	GO:0009410~response to xenobiotic stimulus	18	2.43902	0.00718543	VAV3, BCAR3, LHCGR, ABCC1, SRC, GPR52, CYBB, PTPRM, PTGS2, SLC22A12, MAS1, SFRP1, SFRP2, GNA12, BCL2, TSPO, CALR, SNCA	681	254	19734	2.05356	1	0.501183	0.498081
GOTERM_BP_DIRECT	GO:0050832~defense response to fungus	6	0.813008	0.00745081	DEFA4, S100A12, CTSG, MPO, S100A9, S100A8	681	36	19734	4.82966	1	0.508145	0.504999
GOTERM_BP_DIRECT	GO:0001764~neuron migration	11	1.49051	0.00765874	KIRREL3, MEF2C, AUTS2, SATB2, DNER, TRIM46, DCDC2, FYN, POU4F1, SH3RF1, FGFR1	681	118	19734	2.70134	1	0.510971	0.507808
GOTERM_BP_DIRECT	GO:0043065~positive regulation of apoptotic process	21	2.84553	0.00829845	CAMK1D, DAPK1, GADD45A, SRC, HTRA4, NLRC4, PTGS2, TMEM196, MMP9, KNG1, NR4A1, IL6, SFRP1, SFRP2, WT1, BCL2, TSPO, MNDA, HOXA5, SPDEF, SNCA	681	322	19734	1.88987	1	0.541871	0.538516
GOTERM_BP_DIRECT	GO:0010954~positive regulation of protein processing	4	0.542005	0.00899653	ASTL, SRC, NLRC4, NKD2	681	13	19734	8.9163	1	0.546319	0.542937
GOTERM_BP_DIRECT	GO:0043114~regulation of vascular permeability	4	0.542005	0.00899653	HRH1, YES1, SRC, AZU1	681	13	19734	8.9163	1	0.546319	0.542937
GOTERM_BP_DIRECT	GO:0035589~G protein-coupled purinergic nucleotide receptor signaling pathway	4	0.542005	0.00899653	GPR34, P2RY2, GPR87, P2RY14	681	13	19734	8.9163	1	0.546319	0.542937
GOTERM_BP_DIRECT	GO:0006805~xenobiotic metabolic process	11	1.49051	0.00907862	ABCC4, SULT1B1, ABCC1, SMOX, CYP2S1, CYP4F3, AHRR, S100A12, GLYAT, CYP46A1, SLC28A3	681	121	19734	2.63436	1	0.546319	0.542937
GOTERM_BP_DIRECT	GO:0032355~response to estradiol	9	1.21951	0.0095613	SOCS2, GPI, F7, GJB2, ITGAM, TACR1, CALR, PTGS2, DPEP3	681	86	19734	3.03258	1	0.5643	0.560807
GOTERM_BP_DIRECT	GO:0042742~defense response to bacterium	13	1.76152	0.0100018	ANXA3, HP, DEFB124, LPO, NLRC4, FPR2, LYZ, DEFB108B, MPO, S100A12, S100A9, S100A8, ELANE	681	161	19734	2.33984	1	0.579159	0.575573
GOTERM_BP_DIRECT	GO:0030307~positive regulation of cell growth	9	1.21951	0.0109149	SFRP1, SFRP2, BCL2, AKAP6, AVPR1A, S100A9, PRSS2, S100A8, HBEGF	681	88	19734	2.96366	1	0.620331	0.61649
GOTERM_BP_DIRECT	GO:2001028~positive regulation of endothelial cell chemotaxis	4	0.542005	0.0111607	SEMA5A, TMSB4X, PRKD1, FGFR1	681	14	19734	8.27942	1	0.622766	0.61891
GOTERM_BP_DIRECT	GO:0030154~cell differentiation	36	4.87805	0.0116532	GPSM1, EDA, SRC, CXCL17, RASAL1, CPLX2, ETS2, ARHGAP22, TAF7L, BOLL, FGF9, GNA12, FYN, MORC1, SPDEF, RBM11, SMAD1, KCTD19, MEF2C, PRKCH, YES1, CAV3, ANGPT1, MUSK, MYT1, FGF17, SFRP1, SFRP2, TPPP2, SLC26A8, TCF4, NANOG, PRKD1, NGEF, ZNF750, FGFR1	681	678	19734	1.53865	1	0.638636	0.634683
GOTERM_BP_DIRECT	GO:0000165~MAPK cascade	11	1.49051	0.0118821	SMAD1, DUSP5, MEF2C, EPGN, CAV3, PRKCE, TNIK, SHANK3, SH3RF1, RASGRP3, FGFR1	681	126	19734	2.52982	1	0.639757	0.635797
GOTERM_BP_DIRECT	GO:0060326~cell chemotaxis	9	1.21951	0.0124051	SEMA5A, ABCC1, GPR15, HGF, PRKCQ, AZU1, DEFB108B, EPHB1, HBEGF	681	90	19734	2.8978	1	0.656403	0.652339
GOTERM_BP_DIRECT	GO:0030574~collagen catabolic process	6	0.813008	0.0128713	MRC2, MMP28, PRTN3, MMP8, PRSS2, MMP9	681	41	19734	4.24068	1	0.656846	0.65278
GOTERM_BP_DIRECT	GO:0002639~positive regulation of immunoglobulin production	5	0.677507	0.0130556	CD86, GPI, IL6, IL5, TNFRSF4	681	27	19734	5.36629	1	0.656846	0.65278
GOTERM_BP_DIRECT	GO:0032740~positive regulation of interleukin-17 production	5	0.677507	0.0130556	IL6, IL15, RFTN1, OSM, PRKCQ	681	27	19734	5.36629	1	0.656846	0.65278
GOTERM_BP_DIRECT	GO:0098742~cell-cell adhesion via plasma-membrane adhesion molecules	4	0.542005	0.0135988	IGSF11, MAG, ITGAM, DCHS1	681	15	19734	7.72746	1	0.660842	0.656751
GOTERM_BP_DIRECT	GO:0098869~cellular oxidant detoxification	8	1.08401	0.0136893	HBG2, ALOX5AP, HBE1, HP, LPO, HBA1, PTGS2, S100A9	681	74	19734	3.13275	1	0.660842	0.656751
GOTERM_BP_DIRECT	GO:0050729~positive regulation of inflammatory response	10	1.35501	0.013781	ABCC1, IL15, IL1B, OSM, NKG7, S100A12, NLRC4, S100A9, S100A8, SNCA	681	110	19734	2.63436	1	0.660842	0.656751
GOTERM_BP_DIRECT	GO:0071222~cellular response to lipopolysaccharide	14	1.89702	0.0153001	CD86, MEF2C, SRC, CEBPE, DEFA4, GFI1, AZU1, MMP8, CXCL2, MMP9, IL6, IL1B, TSPO, CTSG	681	191	19734	2.12404	1	0.722398	0.717926
GOTERM_BP_DIRECT	GO:0042713~sperm ejaculation	3	0.406504	0.0162175	TACR1, AVPR1A, ACVR2A	681	6	19734	14.489	1	0.747349	0.742722
GOTERM_BP_DIRECT	GO:0048266~behavioral response to pain	4	0.542005	0.0163155	P2RX3, TSPO, TACR1, THBS4	681	16	19734	7.24449	1	0.747349	0.742722
GOTERM_BP_DIRECT	GO:0042744~hydrogen peroxide catabolic process	5	0.677507	0.0167402	HBG2, HBE1, LPO, HBA1, MPO	681	29	19734	4.9962	1	0.755524	0.750847
GOTERM_BP_DIRECT	GO:0043066~negative regulation of apoptotic process	28	3.79404	0.0173466	SRC, SLC40A1, MPO, SH3RF1, GLI2, PKHD1, SOCS2, CHST11, CLEC5A, MAEL, SNCA, CAMK1D, ANGPT1, DAPK1, HGF, ASNS, AZU1, POU4F1, MMP9, PTK2, SFRP1, IL6, PROC, WT1, CEACAM5, BCL2, LTF, HSPA1A	681	507	19734	1.60036	1	0.771548	0.766771
GOTERM_BP_DIRECT	GO:0010628~positive regulation of gene expression	28	3.79404	0.0181152	RHOXF2, EDA, CEBPE, LRP3, FGF9, BLNK, DNMT3B, ITGB8, HOXA5, SMAD1, MEF2C, ANGPT1, MUSK, EGF, LIF, ANK3, AZU1, POU4F1, FGF17, IL6, WT1, IL1B, PLP1, PRKD1, CALR, ATF3, ZNF750, HSPA1A	681	509	19734	1.59407	1	0.78991	0.78502
GOTERM_BP_DIRECT	GO:0016477~cell migration	18	2.43902	0.0182742	VAV3, RHBDF1, CD63, CARMIL1, LAMA3, ARPC5, MMP9, PTK2, PIK3C2B, VAV2, ITGB8, CDH24, DCHS1, GPC5, CD24, DOCK1, HOXA5, FGFR1	681	281	19734	1.85624	1	0.78991	0.78502
GOTERM_BP_DIRECT	GO:0045087~innate immune response	29	3.92954	0.0195636	ITGAM, SRC, DEFB124, NLRC4, INAVA, JCHAIN, CLEC5A, S100A12, FYN, PGLYRP1, N4BP3, YES1, DAPK1, APOBEC3H, DEFA4, CYBB, SSC5D, RNASE3, DEFB108B, TRAF4, SLPI, TRIM58, TRIM15, BPI, PRKD1, S100A9, S100A8, MSRB1, APOBEC3B	681	536	19734	1.56784	1	0.833897	0.828734
GOTERM_BP_DIRECT	GO:0030335~positive regulation of cell migration	18	2.43902	0.021767	SEMA5A, ACVR1, CARMIL1, SEMA7A, EGF, HGF, PDGFA, PTK2, F7, CEACAM6, DAAM2, IL1B, TMSB15B, PLP1, SNAI1, CPNE3, FAM83B, HBEGF	681	287	19734	1.81743	1	0.915109	0.909444
GOTERM_BP_DIRECT	GO:0031394~positive regulation of prostaglandin biosynthetic process	3	0.406504	0.0221904	IL1B, AVPR1A, PTGS2	681	7	19734	12.4191	1	0.920302	0.914605
GOTERM_BP_DIRECT	GO:0030308~negative regulation of cell growth	10	1.35501	0.0230245	CDA, SFRP1, SFRP2, WT1, GNG4, BCL2, SH3BP4, WFDC1, TMEM196, HSPA1A	681	120	19734	2.41483	1	0.942161	0.936328
GOTERM_BP_DIRECT	GO:0051968~positive regulation of synaptic transmission, glutamatergic	5	0.677507	0.0259015	TSHZ3, PTGS2, GRIN2B, SHANK3, GRIN1	681	33	19734	4.3906	1	1	0.994133
GOTERM_BP_DIRECT	GO:0002076~osteoblast development	4	0.542005	0.0261597	SATB2, CLEC5A, HOXA2, GLI2	681	19	19734	6.10063	1	1	0.994133
GOTERM_BP_DIRECT	GO:0030178~negative regulation of Wnt signaling pathway	6	0.813008	0.0262034	WWOX, SFRP1, SFRP2, FGF9, SOSTDC1, NKD2	681	49	19734	3.54832	1	1	0.994133
GOTERM_BP_DIRECT	GO:0090263~positive regulation of canonical Wnt signaling pathway	10	1.35501	0.0265019	SEMA5A, SFRP1, SFRP2, EDA, FGF9, SRC, DAAM2, EGF, GPC5, RNF220	681	123	19734	2.35593	1	1	0.994133
GOTERM_BP_DIRECT	GO:0001934~positive regulation of protein phosphorylation	14	1.89702	0.0266125	SEMA7A, MUSK, ANGPT1, HGF, EFNA5, MMP9, MOB3B, PTK2, ACVR2A, FGF17, FGF9, IL1B, TNIK, HLA-DRB1	681	206	19734	1.96938	1	1	0.994133
GOTERM_BP_DIRECT	GO:0006952~defense response	8	1.08401	0.0272668	CD83, CEBPE, STAT4, HP, CYBB, SSC5D, MPO, ICOSLG	681	85	19734	2.72734	1	1	0.994133
GOTERM_BP_DIRECT	GO:0007416~synapse assembly	7	0.948509	0.0276745	DNM3, KIRREL3, NRG3, DNER, POU4F1, SHANK3, SDK2	681	67	19734	3.02755	1	1	0.994133
GOTERM_BP_DIRECT	GO:0030010~establishment of cell polarity	5	0.677507	0.0285793	KIF26B, UST, ALPK2, EPHB1, PTK2	681	34	19734	4.26147	1	1	0.994133
GOTERM_BP_DIRECT	GO:0071345~cellular response to cytokine stimulus	5	0.677507	0.0285793	FLT3, DAPK1, DPYSL3, AKAP6, POU4F1	681	34	19734	4.26147	1	1	0.994133
GOTERM_BP_DIRECT	GO:0050996~positive regulation of lipid catabolic process	3	0.406504	0.0289194	SCT, IL1B, PRKCE	681	8	19734	10.8667	1	1	0.994133
GOTERM_BP_DIRECT	GO:0007268~chemical synaptic transmission	15	2.03252	0.0302441	HTR1F, CHRNA6, LPAR3, PDYN, GRIN2B, GRIN1, HRH1, HTR7, GRM7, SV2B, PLP1, PDE7B, SLC12A7, FGF12, SNCA	681	232	19734	1.87358	1	1	0.994133
GOTERM_BP_DIRECT	GO:0050679~positive regulation of epithelial cell proliferation	7	0.948509	0.0314071	PKHD1, SFRP1, EPGN, NR4A3, FGF9, TACR1, GLI2	681	69	19734	2.93979	1	1	0.994133
GOTERM_BP_DIRECT	GO:0050776~regulation of immune response	5	0.677507	0.0314154	FKBP1C, FCER1A, PDCD1, HCST, CD200	681	35	19734	4.13971	1	1	0.994133
GOTERM_BP_DIRECT	GO:0032743~positive regulation of interleukin-2 production	5	0.677507	0.0314154	CD86, CD83, IL1B, PRKCQ, CARD11	681	35	19734	4.13971	1	1	0.994133
GOTERM_BP_DIRECT	GO:0031589~cell-substrate adhesion	4	0.542005	0.0341348	ANGPT1, PRKCE, SORBS1, EPHB1	681	21	19734	5.51961	1	1	0.994133
GOTERM_BP_DIRECT	GO:0043149~stress fiber assembly	4	0.542005	0.0341348	PDLIM1, SRC, PHACTR1, SORBS1	681	21	19734	5.51961	1	1	0.994133
GOTERM_BP_DIRECT	GO:0060252~positive regulation of glial cell proliferation	4	0.542005	0.0341348	IL6, PRKCH, IL1B, TSPO	681	21	19734	5.51961	1	1	0.994133
GOTERM_BP_DIRECT	GO:0043542~endothelial cell migration	5	0.677507	0.034411	DPP4, PTP4A3, S100A12, S100P, S100A9	681	36	19734	4.02472	1	1	0.994133
GOTERM_BP_DIRECT	GO:0048666~neuron development	6	0.813008	0.0352974	ALK, MEF2C, DPYSL3, PBX3, LIF, GLI2	681	53	19734	3.28053	1	1	0.994133
GOTERM_BP_DIRECT	GO:0006898~receptor-mediated endocytosis	7	0.948509	0.0354533	CUBN, ITGAM, CLTCL1, LRP3, FPR2, LRP1B, DNM1	681	71	19734	2.85698	1	1	0.994133
GOTERM_BP_DIRECT	GO:0015889~cobalamin transport	3	0.406504	0.0363453	CUBN, ABCC1, TCN1	681	9	19734	9.65932	1	1	0.994133
GOTERM_BP_DIRECT	GO:0060732~positive regulation of inositol phosphate biosynthetic process	3	0.406504	0.0363453	MAS1, AVPR1B, SNCA	681	9	19734	9.65932	1	1	0.994133
GOTERM_BP_DIRECT	GO:0035722~interleukin-12-mediated signaling pathway	3	0.406504	0.0363453	STAT4, P4HB, PLCB1	681	9	19734	9.65932	1	1	0.994133
GOTERM_BP_DIRECT	GO:0060484~lung-associated mesenchyme development	3	0.406504	0.0363453	FGF9, HOXA5, FGFR1	681	9	19734	9.65932	1	1	0.994133
GOTERM_BP_DIRECT	GO:0001938~positive regulation of endothelial cell proliferation	7	0.948509	0.0375963	PPP1R16B, SEMA5A, NR4A1, EGFL7, EGF, PRKD1, THBS4	681	72	19734	2.8173	1	1	0.994133
GOTERM_BP_DIRECT	GO:0006915~apoptotic process	30	4.06504	0.0378201	CSRNP1, SLC40A1, PCSK9, NLRC4, SHB, MECOM, CHST11, RNF152, BCL2L15, SRGN, WWOX, MEF2C, DAPK1, GADD45A, PRKCE, PAX3, MMP9, NR4A1, TRAF4, CEACAM6, PPP2R2B, CEACAM5, IL1B, BCL2, PDCD1, PRKD1, DOCK1, S100A9, S100A8, TNFRSF21	681	593	19734	1.466	1	1	0.994133
GOTERM_BP_DIRECT	GO:0007187~G protein-coupled receptor signaling pathway, coupled to cyclic nucleotide second messenger	6	0.813008	0.0378392	HRH1, LHCGR, HTR7, CALCRL, HTR1F, LPAR3	681	54	19734	3.21977	1	1	0.994133
GOTERM_BP_DIRECT	GO:0060070~canonical Wnt signaling pathway	9	1.21951	0.0398221	SFRP1, SFRP2, EDA, FGF9, EGF, SNAI1, SOSTDC1, WNT9A, LRP1B	681	112	19734	2.32859	1	1	0.994133
GOTERM_BP_DIRECT	GO:0008584~male gonad development	9	1.21951	0.0398221	MAS1, LHCGR, SFRP1, SFRP2, FGF9, WT1, BCL2, ADAM20, MAMLD1	681	112	19734	2.32859	1	1	0.994133
GOTERM_BP_DIRECT	GO:0007193~adenylate cyclase-inhibiting G protein-coupled receptor signaling pathway	6	0.813008	0.0404903	AKAP12, GRM7, HTR1F, FPR2, ADCY6, GNAI1	681	55	19734	3.16123	1	1	0.994133
GOTERM_BP_DIRECT	GO:0033674~positive regulation of kinase activity	6	0.813008	0.0404903	ALK, MUSK, FLT3, TIE1, HLA-DRB1, FGFR1	681	55	19734	3.16123	1	1	0.994133
GOTERM_BP_DIRECT	GO:0010634~positive regulation of epithelial cell migration	5	0.677507	0.0408831	SRC, PRKCE, TACR1, DOCK1, PTK2	681	38	19734	3.81289	1	1	0.994133
GOTERM_BP_DIRECT	GO:0032006~regulation of TOR signaling	4	0.542005	0.0432204	PKHD1, GNA12, GBA1, FAM83B	681	23	19734	5.03965	1	1	0.994133
GOTERM_BP_DIRECT	GO:0060576~intestinal epithelial cell development	3	0.406504	0.0444122	KLF5, SRC, SPDEF	681	10	19734	8.69339	1	1	0.994133
GOTERM_BP_DIRECT	GO:0001783~B cell apoptotic process	3	0.406504	0.0444122	BCL2, PDCD1, TNFRSF21	681	10	19734	8.69339	1	1	0.994133
GOTERM_BP_DIRECT	GO:0034121~regulation of toll-like receptor signaling pathway	3	0.406504	0.0444122	GFI1, S100A9, S100A8	681	10	19734	8.69339	1	1	0.994133
GOTERM_BP_DIRECT	GO:0019731~antibacterial humoral response	7	0.948509	0.044514	SLPI, DEFA4, CTSG, RNASE3, AZU1, JCHAIN, LTF	681	75	19734	2.70461	1	1	0.994133
GOTERM_BP_DIRECT	GO:0035556~intracellular signal transduction	23	3.11653	0.0448647	GUCY2C, VAV3, PRKCH, MAST4, DAPK1, SRC, PRKCE, DCDC2, PRKAG2, RASAL1, CORO2A, ADCY6, SOCS2, NR4A3, NRG3, PPP1R1C, BLNK, SH3BP5, FYN, PRKCQ, TNIK, PRKD1, RGS6	681	432	19734	1.54281	1	1	0.994133
GOTERM_BP_DIRECT	GO:0006955~immune response	26	3.52304	0.0449156	CD86, SEMA7A, CIITA, EDA, CD1E, CST7, JCHAIN, HLA-DMA, CYSLTR2, ITGB8, CTSG, TNFRSF4, HLA-DQA1, HLA-DPA1, HLA-DRB5, GPR15, IL15, LIF, OSM, IL5, SLPI, GPR183, IL1B, HLA-DPB1, CEACAM8, HLA-DRB1	681	505	19734	1.49194	1	1	0.994133
GOTERM_BP_DIRECT	GO:0006508~proteolysis	28	3.79404	0.0456908	DPP10, HTRA4, HP, PCSK9, ADAM20, ADAMTS16, DPP4, DPP6, ADAM28, MMP28, CTSG, PRSS2, AMZ1, ELANE, TMPRSS11A, HGF, AZU1, MMP8, MMP9, TMPRSS11D, ACR, F7, CAPN11, PROC, ASTL, PRTN3, LTF, DPEP3	681	554	19734	1.46459	1	1	0.994133
GOTERM_BP_DIRECT	GO:0009612~response to mechanical stimulus	6	0.813008	0.0461225	ITGAM, P2RX3, SRC, PIEZO2, KCNA5, MPO	681	57	19734	3.05031	1	1	0.994133
GOTERM_BP_DIRECT	GO:0038095~Fc-epsilon receptor signaling pathway	4	0.542005	0.0481699	VAV3, FCER1A, PRKCQ, VAV2	681	24	19734	4.82966	1	1	0.994133
GOTERM_BP_DIRECT	GO:0071425~hematopoietic stem cell proliferation	4	0.542005	0.0481699	SFRP2, MECOM, GBA1, SHB	681	24	19734	4.82966	1	1	0.994133
GOTERM_BP_DIRECT	GO:0032496~response to lipopolysaccharide	10	1.35501	0.051396	AKAP12, GJB2, SLPI, IL1B, PTGS2, MPO, S100A9, S100A8, ELANE, SNCA	681	139	19734	2.08475	1	1	0.994133
GOTERM_BP_DIRECT	GO:0043123~positive regulation of canonical NF-kappaB signal transduction	14	1.89702	0.0514	EDA, PRKCE, CXXC5, INAVA, MAS1, IL1B, FKBP1C, TRIM58, S100A12, S100P, PRKD1, CARD11, HLA-DRB1, LTF	681	227	19734	1.78719	1	1	0.994133
GOTERM_BP_DIRECT	GO:0051056~regulation of small GTPase mediated signal transduction	9	1.21951	0.0514276	VAV3, ARHGAP22, OBSCN, DOCK3, SIPA1L1, CHN2, ARHGAP26, NGEF, VAV2	681	118	19734	2.21018	1	1	0.994133
GOTERM_BP_DIRECT	GO:0042391~regulation of membrane potential	7	0.948509	0.0521769	KCNH4, CAV3, KCNH8, PIEZO2, GBA1, KCNA5, GRIN1	681	78	19734	2.60059	1	1	0.994133
GOTERM_BP_DIRECT	GO:0009952~anterior/posterior pattern specification	8	1.08401	0.05254	HOXA3, HOXA2, MLLT3, HOXA6, HOXA5, ACVR2A, GLI2, HOXA4	681	98	19734	2.36555	1	1	0.994133
GOTERM_BP_DIRECT	GO:0006182~cGMP biosynthetic process	3	0.406504	0.0530675	GUCY2C, GUCY1A1, GUCY1B1	681	11	19734	7.90308	1	1	0.994133
GOTERM_BP_DIRECT	GO:0150078~positive regulation of neuroinflammatory response	3	0.406504	0.0530675	IL6, IL1B, MMP8	681	11	19734	7.90308	1	1	0.994133
GOTERM_BP_DIRECT	GO:0097062~dendritic spine maintenance	3	0.406504	0.0530675	TANC1, ITPKA, FYN	681	11	19734	7.90308	1	1	0.994133
GOTERM_BP_DIRECT	GO:0006541~glutamine metabolic process	4	0.542005	0.053384	GLYATL1, GFPT2, GGH, ASNS	681	25	19734	4.63648	1	1	0.994133
GOTERM_BP_DIRECT	GO:0060038~cardiac muscle cell proliferation	4	0.542005	0.053384	SMAD1, FGF9, JARID2, FGFR1	681	25	19734	4.63648	1	1	0.994133
GOTERM_BP_DIRECT	GO:0046697~decidualization	4	0.542005	0.053384	GJB2, TPPP3, LIF, PTGS2	681	25	19734	4.63648	1	1	0.994133
GOTERM_BP_DIRECT	GO:0031640~killing of cells of another organism	6	0.813008	0.0554018	DEFA4, NKG7, S100A12, PGLYRP1, LYZ, LTF	681	60	19734	2.8978	1	1	0.994133
GOTERM_BP_DIRECT	GO:2000648~positive regulation of stem cell proliferation	5	0.677507	0.0557517	FGF9, HOXA3, NANOG, GLI2, FGFR1	681	42	19734	3.44976	1	1	0.994133
GOTERM_BP_DIRECT	GO:0042102~positive regulation of T cell proliferation	6	0.813008	0.0587171	CD86, IL6, IL15, IL1B, HLA-DPB1, HLA-DPA1	681	61	19734	2.85029	1	1	0.994133
GOTERM_BP_DIRECT	GO:0050853~B cell receptor signaling pathway	6	0.813008	0.0587171	VAV3, MEF2C, RFTN1, BLNK, BCL2, MNDA	681	61	19734	2.85029	1	1	0.994133
GOTERM_BP_DIRECT	GO:0008045~motor neuron axon guidance	4	0.542005	0.0588567	LAMA3, RAC2, HOXA2, PLXNA4	681	26	19734	4.45815	1	1	0.994133
GOTERM_BP_DIRECT	GO:0002862~negative regulation of inflammatory response to antigenic stimulus	4	0.542005	0.0588567	YES1, SRC, FYN, HLA-DRB1	681	26	19734	4.45815	1	1	0.994133
GOTERM_BP_DIRECT	GO:0002092~positive regulation of receptor internalization	4	0.542005	0.0588567	CD63, ANGPT1, EGF, PCSK9	681	26	19734	4.45815	1	1	0.994133
GOTERM_BP_DIRECT	GO:0007275~multicellular organism development	7	0.948509	0.0605956	ALK, MUSK, FLT3, TIE1, CDH24, DCHS1, FGFR1	681	81	19734	2.50427	1	1	0.994133
GOTERM_BP_DIRECT	GO:0016045~detection of bacterium	3	0.406504	0.0622609	NLRC4, PGLYRP1, HLA-DRB1	681	12	19734	7.24449	1	1	0.994133
GOTERM_BP_DIRECT	GO:0051156~glucose 6-phosphate metabolic process	3	0.406504	0.0622609	GPI, HK3, G6PD	681	12	19734	7.24449	1	1	0.994133
GOTERM_BP_DIRECT	GO:1901731~positive regulation of platelet aggregation	3	0.406504	0.0622609	IL6, MMRN1, CTSG	681	12	19734	7.24449	1	1	0.994133
GOTERM_BP_DIRECT	GO:0002675~positive regulation of acute inflammatory response	3	0.406504	0.0622609	IL6, ALOX5AP, OSM	681	12	19734	7.24449	1	1	0.994133
GOTERM_BP_DIRECT	GO:0007263~nitric oxide mediated signal transduction	3	0.406504	0.0622609	GUCY1A1, RASD1, GUCY1B1	681	12	19734	7.24449	1	1	0.994133
GOTERM_BP_DIRECT	GO:0072112~podocyte differentiation	3	0.406504	0.0622609	WT1, CD24, PROM1	681	12	19734	7.24449	1	1	0.994133
GOTERM_BP_DIRECT	GO:0050919~negative chemotaxis	5	0.677507	0.0641378	DPP4, SEMA5A, SEMA7A, PDGFA, EFNA5	681	44	19734	3.29295	1	1	0.994133
GOTERM_BP_DIRECT	GO:0072139~glomerular parietal epithelial cell differentiation	2	0.271003	0.0677309	CD24, PROM1	681	2	19734	28.978	1	1	0.994133
GOTERM_BP_DIRECT	GO:0070488~neutrophil aggregation	2	0.271003	0.0677309	S100A9, S100A8	681	2	19734	28.978	1	1	0.994133
GOTERM_BP_DIRECT	GO:1904956~regulation of midbrain dopaminergic neuron differentiation	2	0.271003	0.0677309	SFRP1, SFRP2	681	2	19734	28.978	1	1	0.994133
GOTERM_BP_DIRECT	GO:2000041~negative regulation of planar cell polarity pathway involved in axis elongation	2	0.271003	0.0677309	SFRP1, SFRP2	681	2	19734	28.978	1	1	0.994133
GOTERM_BP_DIRECT	GO:0032119~sequestering of zinc ion	2	0.271003	0.0677309	S100A9, S100A8	681	2	19734	28.978	1	1	0.994133
GOTERM_BP_DIRECT	GO:0098990~AMPA selective glutamate receptor signaling pathway	2	0.271003	0.0677309	MEF2C, PLP1	681	2	19734	28.978	1	1	0.994133
GOTERM_BP_DIRECT	GO:0050728~negative regulation of inflammatory response	10	1.35501	0.0682241	PROC, HGF, TMSB4X, CXCL17, WFDC1, GBA1, FPR2, PGLYRP1, METRNL, ELANE	681	147	19734	1.97129	1	1	0.994133
GOTERM_BP_DIRECT	GO:0007566~embryo implantation	5	0.677507	0.0685643	TPPP3, IL1B, LIF, PTGS2, MMP9	681	45	19734	3.21977	1	1	0.994133
GOTERM_BP_DIRECT	GO:0032436~positive regulation of proteasomal ubiquitin-dependent protein catabolic process	7	0.948509	0.0697744	SH3RF3, TRIB3, GBA1, CBFA2T3, SH3RF1, NKD2, HSPA1A	681	84	19734	2.41483	1	1	0.994133
GOTERM_BP_DIRECT	GO:0050804~modulation of chemical synaptic transmission	7	0.948509	0.0697744	AKAP12, NRG3, LRRC4, FYN, EPHB1, DNM1, GRIA4	681	84	19734	2.41483	1	1	0.994133
GOTERM_BP_DIRECT	GO:0045944~positive regulation of transcription by RNA polymerase II	54	7.31707	0.071008	CSRNP1, CIITA, SLC40A1, ETS2, GLI2, MECOM, NAMPT, HOXA2, ZNF521, HOXA5, HOXA4, ACVR1, MEF2C, HGF, PAX3, SFRP2, PKM, IL1B, PRKD1, MAML3, ATF3, ZNF750, HLF, CEBPE, SATB2, PRDM16, STAT4, SMYD3, SPDEF, WWOX, SMAD1, YES1, AUTS2, LIF, OSM, PLEKHA5, PBX3, POU4F1, GRHL2, ACVR2A, ST18, GRIN1, FOXR1, NR4A1, IL6, MEIS1, KLF5, NR4A3, NR6A1, WT1, MAFF, TCF4, NANOG, SSBP2	681	1256	19734	1.24587	1	1	0.994133
GOTERM_BP_DIRECT	GO:0030851~granulocyte differentiation	3	0.406504	0.0719453	CEBPE, ZBTB46, CBFA2T3	681	13	19734	6.68722	1	1	0.994133
GOTERM_BP_DIRECT	GO:0009972~cytidine deamination	3	0.406504	0.0719453	CDA, APOBEC3H, APOBEC3B	681	13	19734	6.68722	1	1	0.994133
GOTERM_BP_DIRECT	GO:0046777~protein autophosphorylation	10	1.35501	0.0729121	ALK, MUSK, FLT3, SRC, DAPK1, PRKD1, TNIK, EPHB1, PTK2, FGFR1	681	149	19734	1.94483	1	1	0.994133
GOTERM_BP_DIRECT	GO:1900026~positive regulation of substrate adhesion-dependent cell spreading	5	0.677507	0.0731443	CARMIL1, P4HB, CALR, OLFM4, DOCK1	681	46	19734	3.14978	1	1	0.994133
GOTERM_BP_DIRECT	GO:0022617~extracellular matrix disassembly	5	0.677507	0.0731443	CTSG, MMP8, PRSS2, MMP9, ELANE	681	46	19734	3.14978	1	1	0.994133
GOTERM_BP_DIRECT	GO:0030509~BMP signaling pathway	7	0.948509	0.0763154	ACVR1, SMAD1, SFRP1, SFRP2, SOSTDC1, FAM83B, ACVR2A	681	86	19734	2.35867	1	1	0.994133
GOTERM_BP_DIRECT	GO:0001774~microglial cell activation	4	0.542005	0.0767617	ITGAM, FPR2, AZU1, SNCA	681	29	19734	3.99696	1	1	0.994133
GOTERM_BP_DIRECT	GO:0010595~positive regulation of endothelial cell migration	6	0.813008	0.0769494	GPI, ANGPT1, ANXA3, EGF, PRKD1, CALR	681	66	19734	2.63436	1	1	0.994133
GOTERM_BP_DIRECT	GO:0042100~B cell proliferation	5	0.677507	0.0778755	MEF2C, IFNK, BCL2, SHB, CARD11	681	47	19734	3.08276	1	1	0.994133
GOTERM_BP_DIRECT	GO:0001649~osteoblast differentiation	9	1.21951	0.0806354	MRC2, WWOX, MEF2C, SEMA7A, SFRP1, FGF9, SNAI1, RRAS2, GLI2	681	130	19734	2.00617	1	1	0.994133
GOTERM_BP_DIRECT	GO:0042531~positive regulation of tyrosine phosphorylation of STAT protein	6	0.813008	0.0809232	IL6, IL15, FLT3, OSM, LIF, FYN	681	67	19734	2.59504	1	1	0.994133
GOTERM_BP_DIRECT	GO:0051279~regulation of release of sequestered calcium ion into cytosol	3	0.406504	0.0820761	UBASH3B, PRKCE, PRKD1	681	14	19734	6.20957	1	1	0.994133
GOTERM_BP_DIRECT	GO:0015670~carbon dioxide transport	3	0.406504	0.0820761	HBG2, HBE1, HBA1	681	14	19734	6.20957	1	1	0.994133
GOTERM_BP_DIRECT	GO:0045580~regulation of T cell differentiation	3	0.406504	0.0820761	IL15, HLA-DOA, CARD11	681	14	19734	6.20957	1	1	0.994133
GOTERM_BP_DIRECT	GO:0070102~interleukin-6-mediated signaling pathway	3	0.406504	0.0820761	IL6, SRC, ST18	681	14	19734	6.20957	1	1	0.994133
GOTERM_BP_DIRECT	GO:0002523~leukocyte migration involved in inflammatory response	3	0.406504	0.0820761	S100A9, S100A8, ELANE	681	14	19734	6.20957	1	1	0.994133
GOTERM_BP_DIRECT	GO:0071498~cellular response to fluid shear stress	3	0.406504	0.0820761	MEF2C, SRC, PTGS2	681	14	19734	6.20957	1	1	0.994133
GOTERM_BP_DIRECT	GO:1904322~cellular response to forskolin	3	0.406504	0.0820761	EFNA5, ADCY6, GNAI1	681	14	19734	6.20957	1	1	0.994133
GOTERM_BP_DIRECT	GO:0048488~synaptic vesicle endocytosis	5	0.677507	0.0827558	DNM3, STON2, DNM1, PACSIN1, SNCA	681	48	19734	3.01854	1	1	0.994133
GOTERM_BP_DIRECT	GO:0021762~substantia nigra development	5	0.677507	0.0827558	MAG, G6PD, FGF9, PLP1, CKB	681	48	19734	3.01854	1	1	0.994133
GOTERM_BP_DIRECT	GO:0008277~regulation of G protein-coupled receptor signaling pathway	5	0.677507	0.0827558	KCTD19, GNG4, PLCB1, RAMP1, RGS6	681	48	19734	3.01854	1	1	0.994133
GOTERM_BP_DIRECT	GO:0035914~skeletal muscle cell differentiation	5	0.677507	0.0827558	NR4A1, HLF, MAFF, HIVEP3, ATF3	681	48	19734	3.01854	1	1	0.994133
GOTERM_BP_DIRECT	GO:0007498~mesoderm development	4	0.542005	0.0832016	TIE1, POU4F1, ETS2, ACVR2A	681	30	19734	3.86373	1	1	0.994133
GOTERM_BP_DIRECT	GO:0090314~positive regulation of protein targeting to membrane	4	0.542005	0.0832016	ITGAM, STOM, FYN, ANK3	681	30	19734	3.86373	1	1	0.994133
GOTERM_BP_DIRECT	GO:0007585~respiratory gaseous exchange by respiratory system	4	0.542005	0.0832016	TRAF4, CHST11, PBX3, TMPRSS11D	681	30	19734	3.86373	1	1	0.994133
GOTERM_BP_DIRECT	GO:0050830~defense response to Gram-positive bacterium	9	1.21951	0.0834375	IL6, RNASE11, IL1B, DEFA4, CTSG, SSC5D, RNASE3, PGLYRP1, LYZ	681	131	19734	1.99085	1	1	0.994133
GOTERM_BP_DIRECT	GO:0002931~response to ischemia	6	0.813008	0.0850043	MEF2C, GJB2, ITGAM, CAV3, NPR3, BCL2	681	68	19734	2.55688	1	1	0.994133
GOTERM_BP_DIRECT	GO:0007229~integrin-mediated signaling pathway	8	1.08401	0.0858081	VAV3, SEMA7A, ITGAM, SRC, ITGB8, PRKD1, DOCK1, PTK2	681	110	19734	2.10749	1	1	0.994133
GOTERM_BP_DIRECT	GO:0051781~positive regulation of cell division	5	0.677507	0.0877827	FGF9, IL1B, OSM, PDGFA, THBS4	681	49	19734	2.95694	1	1	0.994133
GOTERM_BP_DIRECT	GO:0072089~stem cell proliferation	5	0.677507	0.0877827	FGF9, CD109, HOXA3, GLI2, FGFR1	681	49	19734	2.95694	1	1	0.994133
GOTERM_BP_DIRECT	GO:0045840~positive regulation of mitotic nuclear division	4	0.542005	0.0898645	EPGN, NRG4, EGF, IL1B	681	31	19734	3.73909	1	1	0.994133
GOTERM_BP_DIRECT	GO:0048513~animal organ development	4	0.542005	0.0898645	MEF2C, EDA, NRG3, FGFR1	681	31	19734	3.73909	1	1	0.994133
GOTERM_BP_DIRECT	GO:0051602~response to electrical stimulus	4	0.542005	0.0898645	AKAP12, NR4A1, SRC, TACR1	681	31	19734	3.73909	1	1	0.994133
GOTERM_BP_DIRECT	GO:0007015~actin filament organization	10	1.35501	0.0908535	CARMIL1, MARCKSL1, CAV3, TMSB4X, TMSB15B, MYO5C, BCL2, RAC2, ERMN, PACSIN1	681	156	19734	1.85756	1	1	0.994133
GOTERM_BP_DIRECT	GO:0007204~positive regulation of cytosolic calcium ion concentration	10	1.35501	0.0908535	GPR15, AVPR1B, CAV3, ADRA1D, LPAR3, TACR1, FPR2, AVPR1A, CD24, KNG1	681	156	19734	1.85756	1	1	0.994133
GOTERM_BP_DIRECT	GO:0009887~animal organ morphogenesis	9	1.21951	0.0921836	FGF17, MEIS1, ABLIM1, FGF9, LAMA3, PBX3, PDGFA, NTN5, PAX3	681	134	19734	1.94628	1	1	0.994133
GOTERM_BP_DIRECT	GO:0033689~negative regulation of osteoblast proliferation	3	0.406504	0.0926111	MN1, SFRP1, BCL2	681	15	19734	5.79559	1	1	0.994133
GOTERM_BP_DIRECT	GO:0048546~digestive tract morphogenesis	3	0.406504	0.0926111	SFRP1, SFRP2, BCL2	681	15	19734	5.79559	1	1	0.994133
GOTERM_BP_DIRECT	GO:0010524~positive regulation of calcium ion transport into cytosol	3	0.406504	0.0926111	LHCGR, P2RX3, GRIN1	681	15	19734	5.79559	1	1	0.994133
GOTERM_BP_DIRECT	GO:0031103~axon regeneration	3	0.406504	0.0926111	MAG, RTN4RL1, BCL2	681	15	19734	5.79559	1	1	0.994133
GOTERM_BP_DIRECT	GO:0006636~unsaturated fatty acid biosynthetic process	3	0.406504	0.0926111	SCD, ELOVL3, SCD5	681	15	19734	5.79559	1	1	0.994133
GOTERM_BP_DIRECT	GO:0018108~peptidyl-tyrosine phosphorylation	5	0.677507	0.0929535	FLT3, SRC, FYN, PTK2, FGFR1	681	50	19734	2.8978	1	1	0.994133
GOTERM_BP_DIRECT	GO:0060079~excitatory postsynaptic potential	6	0.813008	0.0934839	MEF2C, P2RX3, CHRNA6, GRIN2B, GRIN1, SNCA	681	70	19734	2.48383	1	1	0.994133
GOTERM_BP_DIRECT	GO:0010575~positive regulation of vascular endothelial growth factor production	4	0.542005	0.0967421	IL6, IL1B, CXCL17, PTGS2	681	32	19734	3.62225	1	1	0.994133
GOTERM_BP_DIRECT	GO:0010977~negative regulation of neuron projection development	6	0.813008	0.0978802	MAG, NEU4, RTN4RL1, GFI1, DPYSL3, ADCY6	681	71	19734	2.44884	1	1	0.994133
GOTERM_BP_DIRECT	GO:1900138~negative regulation of phospholipase A2 activity	2	0.271003	0.0998586	ANXA8L1, ANXA8	681	3	19734	19.3186	1	1	0.994133
GOTERM_BP_DIRECT	GO:0032571~response to vitamin K	2	0.271003	0.0998586	F7, F5	681	3	19734	19.3186	1	1	0.994133
GOTERM_BP_DIRECT	GO:2000768~positive regulation of nephron tubule epithelial cell differentiation	2	0.271003	0.0998586	CD24, PROM1	681	3	19734	19.3186	1	1	0.994133
GOTERM_BP_DIRECT	GO:0035821~modulation of process of another organism	2	0.271003	0.0998586	SLPI, S100A9	681	3	19734	19.3186	1	1	0.994133
GOTERM_BP_DIRECT	GO:0002695~negative regulation of leukocyte activation	2	0.271003	0.0998586	ZBTB46, CD200	681	3	19734	19.3186	1	1	0.994133
GOTERM_BP_DIRECT	GO:1903044~protein localization to membrane raft	2	0.271003	0.0998586	RFTN1, CYP46A1	681	3	19734	19.3186	1	1	0.994133
GOTERM_BP_DIRECT	GO:0060480~lung goblet cell differentiation	2	0.271003	0.0998586	HOXA5, SPDEF	681	3	19734	19.3186	1	1	0.994133
GOTERM_BP_DIRECT	GO:0072102~glomerulus morphogenesis	2	0.271003	0.0998586	KIRREL3, MEF2C	681	3	19734	19.3186	1	1	0.994133
GOTERM_BP_DIRECT	GO:0099612~protein localization to axon	2	0.271003	0.0998586	TRIM46, ANK3	681	3	19734	19.3186	1	1	0.994133
GOTERM_BP_DIRECT	GO:0007186~G protein-coupled receptor signaling pathway	41	5.55556	0.101051	GPR87, NPR3, TAS2R46, ADRA1D, FPR2, GNAI1, OR2T33, AKAP12, GPR173, HRH1, RASD1, OR2W3, GNG4, ADGRG5, P2RY2, GNA12, RAC2, OR51B5, RGS6, LHCGR, OR1B1, GPR15, AVPR1B, GPR34, P2RY14, OR1L6, GPR52, TAS2R13, OR51M1, ADGRA3, AVPR1A, MAS1, TAFA5, GPRC5A, GPR142, OR2AJ1, GPR183, GNB5, PLCB1, RAMP1, GPR146	681	943	19734	1.25991	1	1	0.994133
GOTERM_BP_DIRECT	GO:0007157~heterophilic cell-cell adhesion via plasma membrane cell adhesion molecules	6	0.813008	0.102379	CEACAM6, CEACAM5, IL1RAPL1, DCHS1, CEACAM8, NECTIN4	681	72	19734	2.41483	1	1	0.994133
GOTERM_BP_DIRECT	GO:0045730~respiratory burst	3	0.406504	0.10351	RAC2, CYBB, CD24	681	16	19734	5.43337	1	1	0.994133
GOTERM_BP_DIRECT	GO:1900006~positive regulation of dendrite development	3	0.406504	0.10351	ALK, COBL, PACSIN1	681	16	19734	5.43337	1	1	0.994133
GOTERM_BP_DIRECT	GO:0015671~oxygen transport	3	0.406504	0.10351	HBG2, HBE1, HBA1	681	16	19734	5.43337	1	1	0.994133
GOTERM_BP_DIRECT	GO:0010765~positive regulation of sodium ion transport	3	0.406504	0.10351	ANK3, FGF12, SCN4B	681	16	19734	5.43337	1	1	0.994133
GOTERM_BP_DIRECT	GO:0048566~embryonic digestive tract development	3	0.406504	0.10351	FGF9, SCT, GLI2	681	16	19734	5.43337	1	1	0.994133
GOTERM_BP_DIRECT	GO:0030031~cell projection assembly	3	0.406504	0.10351	RAC2, PDGFA, FGFR1	681	16	19734	5.43337	1	1	0.994133
GOTERM_BP_DIRECT	GO:0031623~receptor internalization	5	0.677507	0.103716	DNM3, CALCRL, RAMP1, DNM1, SNCA	681	52	19734	2.78634	1	1	0.994133
GOTERM_BP_DIRECT	GO:0097009~energy homeostasis	5	0.677507	0.103716	ALK, CCDC198, NR4A3, IGF2BP2, METRNL	681	52	19734	2.78634	1	1	0.994133
GOTERM_BP_DIRECT	GO:0048008~platelet-derived growth factor receptor signaling pathway	4	0.542005	0.103826	CSRNP1, NR4A3, SRC, PDGFA	681	33	19734	3.51248	1	1	0.994133
GOTERM_BP_DIRECT	GO:0033574~response to testosterone	4	0.542005	0.103826	GPI, TSPO, GBA1, CALR	681	33	19734	3.51248	1	1	0.994133
GOTERM_BP_DIRECT	GO:0032869~cellular response to insulin stimulus	7	0.948509	0.105795	SLC22A12, PKM, SRC, PCSK9, TRIB3, SORBS1, HDAC9	681	94	19734	2.15793	1	1	0.994133
GOTERM_BP_DIRECT	GO:0007411~axon guidance	12	1.62602	0.105891	SEMA5A, PRTG, SEMA7A, EFNB3, ANOS1, PRKCQ, FYN, EMB, EFNA5, EPHB1, PTK2, GLI2	681	208	19734	1.67181	1	1	0.994133
GOTERM_BP_DIRECT	GO:1904707~positive regulation of vascular associated smooth muscle cell proliferation	5	0.677507	0.109301	CALCRL, NR4A3, FGF9, SRC, MMP9	681	53	19734	2.73377	1	1	0.994133
GOTERM_BP_DIRECT	GO:0048705~skeletal system morphogenesis	4	0.542005	0.111108	CSRNP1, WWOX, RFLNB, FGFR1	681	34	19734	3.40917	1	1	0.994133
GOTERM_BP_DIRECT	GO:0031069~hair follicle morphogenesis	4	0.542005	0.111108	BCL2, SNAI1, SOSTDC1, GLI2	681	34	19734	3.40917	1	1	0.994133
GOTERM_BP_DIRECT	GO:0001578~microtubule bundle formation	4	0.542005	0.111108	TTLL6, TPPP3, TPPP2, TRIM46	681	34	19734	3.40917	1	1	0.994133
GOTERM_BP_DIRECT	GO:0030522~intracellular receptor signaling pathway	4	0.542005	0.111108	NR4A1, NR6A1, NR4A3, AHRR	681	34	19734	3.40917	1	1	0.994133
GOTERM_BP_DIRECT	GO:0007267~cell-cell signaling	13	1.76152	0.111458	SEMA5A, IL15, PDGFA, ADRA1D, FGF17, GJB2, SFRP2, EFNB3, FGF9, IL1B, NAMPT, S100A9, FGF12	681	234	19734	1.60989	1	1	0.994133
GOTERM_BP_DIRECT	GO:0010467~gene expression	9	1.21951	0.11455	EDA, HOXA3, LIF, FYN, LPAR3, MLLT3, SHANK3, GLI2, FGFR1	681	141	19734	1.84966	1	1	0.994133
GOTERM_BP_DIRECT	GO:0070528~protein kinase C signaling	3	0.406504	0.114737	MAS1, PRKCH, AZU1	681	17	19734	5.11376	1	1	0.994133
GOTERM_BP_DIRECT	GO:0061045~negative regulation of wound healing	3	0.406504	0.114737	MMRN1, CD109, WFDC1	681	17	19734	5.11376	1	1	0.994133
GOTERM_BP_DIRECT	GO:0048246~macrophage chemotaxis	3	0.406504	0.114737	IL1B, CXCL17, AZU1	681	17	19734	5.11376	1	1	0.994133
GOTERM_BP_DIRECT	GO:0035641~locomotory exploration behavior	3	0.406504	0.114737	DPP4, PRKCE, SHANK3	681	17	19734	5.11376	1	1	0.994133
GOTERM_BP_DIRECT	GO:0043652~engulfment of apoptotic cell	3	0.406504	0.114737	RAC2, XKR4, XKR5	681	17	19734	5.11376	1	1	0.994133
GOTERM_BP_DIRECT	GO:0014002~astrocyte development	3	0.406504	0.114737	PLP1, S100A9, S100A8	681	17	19734	5.11376	1	1	0.994133
GOTERM_BP_DIRECT	GO:0048661~positive regulation of smooth muscle cell proliferation	5	0.677507	0.115018	IL6, NR4A3, PTGS2, ELANE, HBEGF	681	54	19734	2.68315	1	1	0.994133
GOTERM_BP_DIRECT	GO:0042733~embryonic digit morphogenesis	5	0.677507	0.115018	SFRP2, CHST11, GNA12, GRHL2, GLI2	681	54	19734	2.68315	1	1	0.994133
GOTERM_BP_DIRECT	GO:0007389~pattern specification process	4	0.542005	0.118579	NRG3, SOSTDC1, DCHS1, GLI2	681	35	19734	3.31177	1	1	0.994133
GOTERM_BP_DIRECT	GO:0071276~cellular response to cadmium ion	4	0.542005	0.118579	MT1F, CYBB, MT1X, MMP9	681	35	19734	3.31177	1	1	0.994133
GOTERM_BP_DIRECT	GO:0099175~regulation of postsynapse organization	4	0.542005	0.118579	ARHGAP22, TANC1, IL1RAPL1, ABHD17C	681	35	19734	3.31177	1	1	0.994133
GOTERM_BP_DIRECT	GO:0050766~positive regulation of phagocytosis	5	0.677507	0.120863	CAMK1D, IL15, FPR2, AZU1, CALR	681	55	19734	2.63436	1	1	0.994133
GOTERM_BP_DIRECT	GO:0007264~small GTPase-mediated signal transduction	7	0.948509	0.122456	VAV3, BCAR3, DOCK3, RAC2, DOCK1, VAV2, RASGRP3	681	98	19734	2.06986	1	1	0.994133
GOTERM_BP_DIRECT	GO:0070372~regulation of ERK1 and ERK2 cascade	4	0.542005	0.126231	PKHD1, IL1B, EPHB1, FAM83B	681	36	19734	3.21977	1	1	0.994133
GOTERM_BP_DIRECT	GO:1901379~regulation of potassium ion transmembrane transport	3	0.406504	0.126254	DPP10, CD63, DPP6	681	18	19734	4.82966	1	1	0.994133
GOTERM_BP_DIRECT	GO:0060749~mammary gland alveolus development	3	0.406504	0.126254	SOCS2, EGF, HOXA5	681	18	19734	4.82966	1	1	0.994133
GOTERM_BP_DIRECT	GO:0042119~neutrophil activation	3	0.406504	0.126254	IL15, IL1B, CTSG	681	18	19734	4.82966	1	1	0.994133
GOTERM_BP_DIRECT	GO:0071380~cellular response to prostaglandin E stimulus	3	0.406504	0.126254	SFRP1, PRKCE, ADCY6	681	18	19734	4.82966	1	1	0.994133
GOTERM_BP_DIRECT	GO:0003382~epithelial cell morphogenesis	3	0.406504	0.126254	PKHD1, FLNB, GRHL2	681	18	19734	4.82966	1	1	0.994133
GOTERM_BP_DIRECT	GO:0008217~regulation of blood pressure	6	0.813008	0.126358	GUCY1A1, GNA12, NPR3, CYP4F3, ATP2B1, PTGS2	681	77	19734	2.25802	1	1	0.994133
GOTERM_BP_DIRECT	GO:0006469~negative regulation of protein kinase activity	5	0.677507	0.126833	CAV3, UBASH3B, PRKAG2, TRIB3, SNCA	681	56	19734	2.58732	1	1	0.994133
GOTERM_BP_DIRECT	GO:0000122~negative regulation of transcription by RNA polymerase II	41	5.55556	0.128274	ZBTB8A, CIITA, ZBTB46, SATB2, GFI1, AEBP1, CXXC5, HDAC9, ETS2, BACH2, GLI2, FGF9, PRDM16, MAEL, DNMT3B, HOXA2, JARID2, CRYM, ELANE, SPDEF, SNCA, MEF2C, GADD45A, POU4F1, SCRT1, FOXR1, NR4A3, NR6A1, KLF5, WT1, MAFF, SNAI1, GTF2IRD1, TRIB3, NANOG, CALR, ATF3, ZNF750, FGFR1, HSPA1A, DPEP3	681	963	19734	1.23375	1	1	0.994133
GOTERM_BP_DIRECT	GO:0050852~T cell receptor signaling pathway	8	1.08401	0.128701	MOG, RFTN1, HLA-DPB1, FYN, SHB, HLA-DRB1, TNFRSF21, ICOSLG	681	122	19734	1.90019	1	1	0.994133
GOTERM_BP_DIRECT	GO:0019722~calcium-mediated signaling	8	1.08401	0.128701	GPR15, RCAN2, ITPR1, FPR2, AVPR1A, GRIN2B, NCALD, GRIN1	681	122	19734	1.90019	1	1	0.994133
GOTERM_BP_DIRECT	GO:0021615~glossopharyngeal nerve morphogenesis	2	0.271003	0.130881	HOXA3, PLXNA4	681	4	19734	14.489	1	1	0.994133
GOTERM_BP_DIRECT	GO:0072148~epithelial cell fate commitment	2	0.271003	0.130881	SOSTDC1, SPDEF	681	4	19734	14.489	1	1	0.994133
GOTERM_BP_DIRECT	GO:0090244~Wnt signaling pathway involved in somitogenesis	2	0.271003	0.130881	SFRP1, SFRP2	681	4	19734	14.489	1	1	0.994133
GOTERM_BP_DIRECT	GO:0010957~negative regulation of vitamin D biosynthetic process	2	0.271003	0.130881	GFI1, SNAI1	681	4	19734	14.489	1	1	0.994133
GOTERM_BP_DIRECT	GO:0043949~regulation of cAMP-mediated signaling	2	0.271003	0.130881	RASD2, GNAI1	681	4	19734	14.489	1	1	0.994133
GOTERM_BP_DIRECT	GO:0060665~regulation of branching involved in salivary gland morphogenesis by mesenchymal-epithelial signaling	2	0.271003	0.130881	HGF, FGFR1	681	4	19734	14.489	1	1	0.994133
GOTERM_BP_DIRECT	GO:1990408~calcitonin gene-related peptide receptor signaling pathway	2	0.271003	0.130881	CALCRL, RAMP1	681	4	19734	14.489	1	1	0.994133
GOTERM_BP_DIRECT	GO:1902951~negative regulation of dendritic spine maintenance	2	0.271003	0.130881	FYN, GRIN2B	681	4	19734	14.489	1	1	0.994133
GOTERM_BP_DIRECT	GO:0018119~peptidyl-cysteine S-nitrosylation	2	0.271003	0.130881	S100A9, S100A8	681	4	19734	14.489	1	1	0.994133
GOTERM_BP_DIRECT	GO:1900746~regulation of vascular endothelial growth factor signaling pathway	2	0.271003	0.130881	CD63, PTP4A3	681	4	19734	14.489	1	1	0.994133
GOTERM_BP_DIRECT	GO:0010454~negative regulation of cell fate commitment	2	0.271003	0.130881	SOSTDC1, SPDEF	681	4	19734	14.489	1	1	0.994133
GOTERM_BP_DIRECT	GO:0007200~phospholipase C-activating G protein-coupled receptor signaling pathway	7	0.948509	0.131241	HRH1, LHCGR, P2RY2, ADRA1D, PRKD1, TACR1, FPR2	681	100	19734	2.02846	1	1	0.994133
GOTERM_BP_DIRECT	GO:1903078~positive regulation of protein localization to plasma membrane	5	0.677507	0.132924	DPP10, PRKCH, PRKCE, SORBS1, NKD2	681	57	19734	2.54193	1	1	0.994133
GOTERM_BP_DIRECT	GO:0031100~animal organ regeneration	4	0.542005	0.134054	F7, NR4A3, FLT3, ANXA3	681	37	19734	3.13275	1	1	0.994133
GOTERM_BP_DIRECT	GO:0070555~response to interleukin-1	4	0.542005	0.134054	SLC30A8, SRC, IL1B, SNCA	681	37	19734	3.13275	1	1	0.994133
GOTERM_BP_DIRECT	GO:0001657~ureteric bud development	4	0.542005	0.134054	SMAD1, SFRP1, WT1, FGFR1	681	37	19734	3.13275	1	1	0.994133
GOTERM_BP_DIRECT	GO:0042542~response to hydrogen peroxide	4	0.542005	0.134054	BCL2, HP, KCNA5, HBA1	681	37	19734	3.13275	1	1	0.994133
GOTERM_BP_DIRECT	GO:0032570~response to progesterone	4	0.542005	0.134054	GPI, GJB2, TSPO, TACR1	681	37	19734	3.13275	1	1	0.994133
GOTERM_BP_DIRECT	GO:0010976~positive regulation of neuron projection development	8	1.08401	0.136738	CAMK1D, MUSK, NEGR1, DPYSL3, FYN, PRKD1, S100A9, FGFR1	681	124	19734	1.86955	1	1	0.994133
GOTERM_BP_DIRECT	GO:2000649~regulation of sodium ion transmembrane transporter activity	3	0.406504	0.13803	CAV3, FGF12, SCN4B	681	19	19734	4.57547	1	1	0.994133
GOTERM_BP_DIRECT	GO:0051963~regulation of synapse assembly	3	0.406504	0.13803	MEF2C, NEGR1, RAB17	681	19	19734	4.57547	1	1	0.994133
GOTERM_BP_DIRECT	GO:0051489~regulation of filopodium assembly	3	0.406504	0.13803	PPP1R16B, DAAM2, RAB17	681	19	19734	4.57547	1	1	0.994133
GOTERM_BP_DIRECT	GO:0071318~cellular response to ATP	3	0.406504	0.13803	P2RX3, P2RY2, PTGS2	681	19	19734	4.57547	1	1	0.994133
GOTERM_BP_DIRECT	GO:0002227~innate immune response in mucosa	4	0.542005	0.14204	DEFA4, RNASE3, RNASE2, LTF	681	38	19734	3.05031	1	1	0.994133
GOTERM_BP_DIRECT	GO:0006897~endocytosis	10	1.35501	0.14419	DNM3, MRC2, EHD2, RAB5B, CAV3, DNER, SH3BP4, RAB17, LRP1B, DNM1	681	173	19734	1.67503	1	1	0.994133
GOTERM_BP_DIRECT	GO:0046330~positive regulation of JNK cascade	7	0.948509	0.144965	SH3RF3, TRAF4, GADD45A, IL1B, TNIK, PLCB1, SH3RF1	681	103	19734	1.96938	1	1	0.994133
GOTERM_BP_DIRECT	GO:0032024~positive regulation of insulin secretion	5	0.677507	0.145456	SLC30A8, PRKCE, ITPR1, DOC2B, PLCB1	681	59	19734	2.45576	1	1	0.994133
GOTERM_BP_DIRECT	GO:0030155~regulation of cell adhesion	5	0.677507	0.145456	PKHD1, LAMA3, CYTIP, FUT2, PTK2	681	59	19734	2.45576	1	1	0.994133
GOTERM_BP_DIRECT	GO:0016310~phosphorylation	28	3.79404	0.148822	ALK, CIITA, MAST4, FLT3, SRC, PRKAG2, AKAP6, PIK3C2B, FYN, CKB, PACSIN1, ACVR1, PRKCH, CAMK1D, YES1, MUSK, DAPK1, PRKCE, TIE1, ACVR2A, PTK2, OBSCN, PKM, ITPKA, TNIK, PRKD1, ALPK2, FGFR1	681	633	19734	1.28181	1	1	0.994133
GOTERM_BP_DIRECT	GO:0034599~cellular response to oxidative stress	7	0.948509	0.14968	GJB2, ABCC1, G6PD, PRKD1, RBM11, HSPA1A, SNCA	681	104	19734	1.95044	1	1	0.994133
GOTERM_BP_DIRECT	GO:0055078~sodium ion homeostasis	3	0.406504	0.150033	CYP4F3, SLC12A1, SCN7A	681	20	19734	4.3467	1	1	0.994133
GOTERM_BP_DIRECT	GO:0090026~positive regulation of monocyte chemotaxis	3	0.406504	0.150033	CXCL17, DEFB124, FPR2	681	20	19734	4.3467	1	1	0.994133
GOTERM_BP_DIRECT	GO:0055075~potassium ion homeostasis	3	0.406504	0.150033	SLC12A1, KCNA5, SLC12A7	681	20	19734	4.3467	1	1	0.994133
GOTERM_BP_DIRECT	GO:0036342~post-anal tail morphogenesis	3	0.406504	0.150033	SFRP2, CHST11, DCHS1	681	20	19734	4.3467	1	1	0.994133
GOTERM_BP_DIRECT	GO:0007215~glutamate receptor signaling pathway	3	0.406504	0.150033	PLCB1, GRIN2B, GRIA4	681	20	19734	4.3467	1	1	0.994133
GOTERM_BP_DIRECT	GO:0030032~lamellipodium assembly	4	0.542005	0.15018	VAV3, CARMIL1, ABLIM1, VAV2	681	39	19734	2.9721	1	1	0.994133
GOTERM_BP_DIRECT	GO:0045785~positive regulation of cell adhesion	5	0.677507	0.151888	VAV3, ANGPT1, AZU1, P4HB, PRSS2	681	60	19734	2.41483	1	1	0.994133
GOTERM_BP_DIRECT	GO:0051402~neuron apoptotic process	6	0.813008	0.152649	ANGPT1, BCL2, GBA1, POU4F1, TNFRSF21, SNCA	681	82	19734	2.12034	1	1	0.994133
GOTERM_BP_DIRECT	GO:0030593~neutrophil chemotaxis	6	0.813008	0.158163	VAV3, IL1B, S100A12, S100A9, CXCL2, S100A8	681	83	19734	2.09479	1	1	0.994133
GOTERM_BP_DIRECT	GO:0051965~positive regulation of synapse assembly	5	0.677507	0.158427	SRPX2, LRRN3, IL1RAPL1, EFNA5, EPHB1	681	61	19734	2.37524	1	1	0.994133
GOTERM_BP_DIRECT	GO:0030100~regulation of endocytosis	4	0.542005	0.158465	RAB5B, RAB17, STON2, PACSIN1	681	40	19734	2.8978	1	1	0.994133
GOTERM_BP_DIRECT	GO:0032870~cellular response to hormone stimulus	4	0.542005	0.158465	SOCS2, AVPR1B, AVPR1A, RAMP1	681	40	19734	2.8978	1	1	0.994133
GOTERM_BP_DIRECT	GO:0001580~detection of chemical stimulus involved in sensory perception of bitter taste	4	0.542005	0.158465	RTP5, TAS2R13, TAS2R46, LPO	681	40	19734	2.8978	1	1	0.994133
GOTERM_BP_DIRECT	GO:0001974~blood vessel remodeling	4	0.542005	0.158465	MEF2C, NPR3, HOXA3, LIF	681	40	19734	2.8978	1	1	0.994133
GOTERM_BP_DIRECT	GO:0001666~response to hypoxia	10	1.35501	0.158649	PDLIM1, DPP4, F7, P2RX3, CAV3, LIF, ITPR1, KCNA5, CD24, CBFA2T3	681	177	19734	1.63717	1	1	0.994133
GOTERM_BP_DIRECT	GO:0051649~establishment of localization in cell	7	0.948509	0.159313	CUBN, P2RX3, CAV3, PRKCE, BCL2, SLC40A1, SCN4B	681	106	19734	1.91364	1	1	0.994133
GOTERM_BP_DIRECT	GO:1902817~negative regulation of protein localization to microtubule	2	0.271003	0.160835	MAP1A, ABHD17C	681	5	19734	11.5912	1	1	0.994133
GOTERM_BP_DIRECT	GO:0070482~response to oxygen levels	2	0.271003	0.160835	GUCY1A1, GUCY1B1	681	5	19734	11.5912	1	1	0.994133
GOTERM_BP_DIRECT	GO:0032310~prostaglandin secretion	2	0.271003	0.160835	ABCC4, PTGS2	681	5	19734	11.5912	1	1	0.994133
GOTERM_BP_DIRECT	GO:0001992~regulation of systemic arterial blood pressure by vasopressin	2	0.271003	0.160835	AVPR1B, AVPR1A	681	5	19734	11.5912	1	1	0.994133
GOTERM_BP_DIRECT	GO:1900004~negative regulation of serine-type endopeptidase activity	2	0.271003	0.160835	ANXA8L1, ANXA8	681	5	19734	11.5912	1	1	0.994133
GOTERM_BP_DIRECT	GO:0019732~antifungal humoral response	2	0.271003	0.160835	DEFA4, LTF	681	5	19734	11.5912	1	1	0.994133
GOTERM_BP_DIRECT	GO:0051494~negative regulation of cytoskeleton organization	2	0.271003	0.160835	IQCJ-SCHIP1, SCHIP1	681	5	19734	11.5912	1	1	0.994133
GOTERM_BP_DIRECT	GO:0032273~positive regulation of protein polymerization	2	0.271003	0.160835	TPPP3, TPPP2	681	5	19734	11.5912	1	1	0.994133
GOTERM_BP_DIRECT	GO:1905037~autophagosome organization	2	0.271003	0.160835	GBA1, PIK3C2B	681	5	19734	11.5912	1	1	0.994133
GOTERM_BP_DIRECT	GO:0060011~Sertoli cell proliferation	2	0.271003	0.160835	FGF9, ACVR2A	681	5	19734	11.5912	1	1	0.994133
GOTERM_BP_DIRECT	GO:0016185~synaptic vesicle budding from presynaptic endocytic zone membrane	2	0.271003	0.160835	DNM3, DNM1	681	5	19734	11.5912	1	1	0.994133
GOTERM_BP_DIRECT	GO:0032831~positive regulation of CD4-positive, CD25-positive, alpha-beta regulatory T cell differentiation	2	0.271003	0.160835	KLHL25, HLA-DRB1	681	5	19734	11.5912	1	1	0.994133
GOTERM_BP_DIRECT	GO:0060923~cardiac muscle cell fate commitment	2	0.271003	0.160835	ACVR1, WT1	681	5	19734	11.5912	1	1	0.994133
GOTERM_BP_DIRECT	GO:0060219~camera-type eye photoreceptor cell differentiation	2	0.271003	0.160835	PROM1, SDK2	681	5	19734	11.5912	1	1	0.994133
GOTERM_BP_DIRECT	GO:0001936~regulation of endothelial cell proliferation	2	0.271003	0.160835	TIE1, FUT2	681	5	19734	11.5912	1	1	0.994133
GOTERM_BP_DIRECT	GO:0031622~positive regulation of fever generation	2	0.271003	0.160835	IL1B, PTGS2	681	5	19734	11.5912	1	1	0.994133
GOTERM_BP_DIRECT	GO:0032924~activin receptor signaling pathway	3	0.406504	0.162233	ACVR1, FGF9, ACVR2A	681	21	19734	4.13971	1	1	0.994133
GOTERM_BP_DIRECT	GO:0031290~retinal ganglion cell axon guidance	3	0.406504	0.162233	PTPRM, EFNA5, EPHB1	681	21	19734	4.13971	1	1	0.994133
GOTERM_BP_DIRECT	GO:0014911~positive regulation of smooth muscle cell migration	3	0.406504	0.162233	SRC, BCL2, S100A11	681	21	19734	4.13971	1	1	0.994133
GOTERM_BP_DIRECT	GO:0043523~regulation of neuron apoptotic process	3	0.406504	0.162233	MEF2C, G6PD, PCSK9	681	21	19734	4.13971	1	1	0.994133
GOTERM_BP_DIRECT	GO:0060218~hematopoietic stem cell differentiation	3	0.406504	0.162233	SFRP1, BCL2, MLLT3	681	21	19734	4.13971	1	1	0.994133
GOTERM_BP_DIRECT	GO:0150104~transport across blood-brain barrier	6	0.813008	0.163758	ABCC4, ABCC1, AVPR1B, LRP3, AVPR1A, SLC4A3	681	84	19734	2.06986	1	1	0.994133
GOTERM_BP_DIRECT	GO:0051480~regulation of cytosolic calcium ion concentration	4	0.542005	0.166887	CAV3, TMEM178A, ITPR1, ATP2B1	681	41	19734	2.82712	1	1	0.994133
GOTERM_BP_DIRECT	GO:0030168~platelet activation	5	0.677507	0.171805	VAV3, IL6, SRC, CTSG, VAV2	681	63	19734	2.29984	1	1	0.994133
GOTERM_BP_DIRECT	GO:0061844~antimicrobial humoral immune response mediated by antimicrobial peptide	7	0.948509	0.174249	DEFA4, S100A12, RNASE3, PGLYRP1, S100A9, CXCL2, LTF	681	109	19734	1.86097	1	1	0.994133
GOTERM_BP_DIRECT	GO:0030318~melanocyte differentiation	3	0.406504	0.174602	OCA2, MEF2C, BCL2	681	22	19734	3.95154	1	1	0.994133
GOTERM_BP_DIRECT	GO:0048754~branching morphogenesis of an epithelial tube	3	0.406504	0.174602	PKHD1, EGF, GLI2	681	22	19734	3.95154	1	1	0.994133
GOTERM_BP_DIRECT	GO:0030279~negative regulation of ossification	3	0.406504	0.174602	MEF2C, SFRP1, BCL2	681	22	19734	3.95154	1	1	0.994133
GOTERM_BP_DIRECT	GO:0030501~positive regulation of bone mineralization	4	0.542005	0.175436	ACVR1, MEF2C, ATP2B1, ACVR2A	681	42	19734	2.75981	1	1	0.994133
GOTERM_BP_DIRECT	GO:0032733~positive regulation of interleukin-10 production	4	0.542005	0.175436	IL6, CD83, HGF, INAVA	681	42	19734	2.75981	1	1	0.994133
GOTERM_BP_DIRECT	GO:0035094~response to nicotine	4	0.542005	0.175436	CHRNA6, BCL2, TACR1, KCNK1	681	42	19734	2.75981	1	1	0.994133
GOTERM_BP_DIRECT	GO:0007160~cell-matrix adhesion	7	0.948509	0.179351	COL17A1, CD63, ITGAM, EDA, ITGB8, SORBS1, MUC4	681	110	19734	1.84405	1	1	0.994133
GOTERM_BP_DIRECT	GO:0007613~memory	6	0.813008	0.180999	HRH1, MUSK, MAP1A, PLCB1, PTGS2, SHANK3	681	87	19734	1.99848	1	1	0.994133
GOTERM_BP_DIRECT	GO:0048704~embryonic skeletal system morphogenesis	4	0.542005	0.184103	SATB2, HOXA3, HOXA5, HOXA4	681	43	19734	2.69563	1	1	0.994133
GOTERM_BP_DIRECT	GO:0001654~eye development	4	0.542005	0.184103	MEIS1, FGF9, MAB21L2, PBX3	681	43	19734	2.69563	1	1	0.994133
GOTERM_BP_DIRECT	GO:0036120~cellular response to platelet-derived growth factor stimulus	3	0.406504	0.187114	YES1, SRC, FYN	681	23	19734	3.77974	1	1	0.994133
GOTERM_BP_DIRECT	GO:0050730~regulation of peptidyl-tyrosine phosphorylation	3	0.406504	0.187114	PRKCE, PDGFA, FYN	681	23	19734	3.77974	1	1	0.994133
GOTERM_BP_DIRECT	GO:0070498~interleukin-1-mediated signaling pathway	3	0.406504	0.187114	IL1B, PLCB1, ST18	681	23	19734	3.77974	1	1	0.994133
GOTERM_BP_DIRECT	GO:1900273~positive regulation of long-term synaptic potentiation	3	0.406504	0.187114	IGSF11, SHANK3, PDE9A	681	23	19734	3.77974	1	1	0.994133
GOTERM_BP_DIRECT	GO:0014856~skeletal muscle cell proliferation	2	0.271003	0.189759	SRC, HGF	681	6	19734	9.65932	1	1	0.994133
GOTERM_BP_DIRECT	GO:0070257~positive regulation of mucus secretion	2	0.271003	0.189759	P2RY2, PRKCE	681	6	19734	9.65932	1	1	0.994133
GOTERM_BP_DIRECT	GO:0038128~ERBB2 signaling pathway	2	0.271003	0.189759	SRC, CPNE3	681	6	19734	9.65932	1	1	0.994133
GOTERM_BP_DIRECT	GO:0051902~negative regulation of mitochondrial depolarization	2	0.271003	0.189759	SRC, BCL2	681	6	19734	9.65932	1	1	0.994133
GOTERM_BP_DIRECT	GO:0031581~hemidesmosome assembly	2	0.271003	0.189759	COL17A1, LAMA3	681	6	19734	9.65932	1	1	0.994133
GOTERM_BP_DIRECT	GO:0010632~regulation of epithelial cell migration	2	0.271003	0.189759	SRC, PTK2	681	6	19734	9.65932	1	1	0.994133
GOTERM_BP_DIRECT	GO:0038138~ERBB4-ERBB4 signaling pathway	2	0.271003	0.189759	NRG3, NRG4	681	6	19734	9.65932	1	1	0.994133
GOTERM_BP_DIRECT	GO:0044355~clearance of foreign intracellular DNA	2	0.271003	0.189759	APOBEC3H, APOBEC3B	681	6	19734	9.65932	1	1	0.994133
GOTERM_BP_DIRECT	GO:0003402~planar cell polarity pathway involved in axis elongation	2	0.271003	0.189759	SFRP1, SFRP2	681	6	19734	9.65932	1	1	0.994133
GOTERM_BP_DIRECT	GO:0048713~regulation of oligodendrocyte differentiation	2	0.271003	0.189759	OPALIN, TNFRSF21	681	6	19734	9.65932	1	1	0.994133
GOTERM_BP_DIRECT	GO:0071371~cellular response to gonadotropin stimulus	2	0.271003	0.189759	LHCGR, WT1	681	6	19734	9.65932	1	1	0.994133
GOTERM_BP_DIRECT	GO:0002768~immune response-regulating cell surface receptor signaling pathway	2	0.271003	0.189759	FPR2, CD24	681	6	19734	9.65932	1	1	0.994133
GOTERM_BP_DIRECT	GO:0014910~regulation of smooth muscle cell migration	2	0.271003	0.189759	PDGFA, TACR1	681	6	19734	9.65932	1	1	0.994133
GOTERM_BP_DIRECT	GO:0007605~sensory perception of sound	9	1.21951	0.192465	GJB2, GRM7, DCDC2, PAX3, ATP6V0A4, TSPEAR, ESPN, CRYM, FGFR1	681	161	19734	1.61989	1	1	0.994133
GOTERM_BP_DIRECT	GO:0007032~endosome organization	4	0.542005	0.192881	ANXA8L1, RAB5B, ANXA8, DNM1	681	44	19734	2.63436	1	1	0.994133
GOTERM_BP_DIRECT	GO:0001658~branching involved in ureteric bud morphogenesis	4	0.542005	0.192881	ADAMTS16, WT1, BCL2, DCHS1	681	44	19734	2.63436	1	1	0.994133
GOTERM_BP_DIRECT	GO:0001817~regulation of cytokine production	5	0.677507	0.199654	MOG, IGF2BP3, IGF2BP2, ICOSLG, LTF	681	67	19734	2.16254	1	1	0.994133
GOTERM_BP_DIRECT	GO:1901224~positive regulation of non-canonical NF-kappaB signal transduction	5	0.677507	0.199654	CD86, PTP4A3, EDA, IL1B, CALR	681	67	19734	2.16254	1	1	0.994133
GOTERM_BP_DIRECT	GO:0035235~ionotropic glutamate receptor signaling pathway	3	0.406504	0.199746	GRIN2B, GRIN1, GRIA4	681	24	19734	3.62225	1	1	0.994133
GOTERM_BP_DIRECT	GO:0006911~phagocytosis, engulfment	3	0.406504	0.199746	ITGAM, HAVCR1, DOCK1	681	24	19734	3.62225	1	1	0.994133
GOTERM_BP_DIRECT	GO:0086002~cardiac muscle cell action potential involved in contraction	3	0.406504	0.199746	SCN7A, FGF12, SCN4B	681	24	19734	3.62225	1	1	0.994133
GOTERM_BP_DIRECT	GO:0045861~negative regulation of proteolysis	3	0.406504	0.199746	CSTA, TM4SF20, KNG1	681	24	19734	3.62225	1	1	0.994133
GOTERM_BP_DIRECT	GO:0071294~cellular response to zinc ion	3	0.406504	0.199746	MT1F, TSPO, MT1X	681	24	19734	3.62225	1	1	0.994133
GOTERM_BP_DIRECT	GO:0050768~negative regulation of neurogenesis	3	0.406504	0.199746	PRTG, IL6, IL1B	681	24	19734	3.62225	1	1	0.994133
GOTERM_BP_DIRECT	GO:0051493~regulation of cytoskeleton organization	3	0.406504	0.199746	S100A9, PTK2, S100A8	681	24	19734	3.62225	1	1	0.994133
GOTERM_BP_DIRECT	GO:0036211~protein modification process	7	0.948509	0.200339	TTLL6, YES1, PRKCH, QPCT, PRKD1, RIMKLA, TTLL9	681	114	19734	1.77935	1	1	0.994133
GOTERM_BP_DIRECT	GO:0007281~germ cell development	4	0.542005	0.201761	ACVR1, WT1, TDRD5, TCP11	681	45	19734	2.57582	1	1	0.994133
GOTERM_BP_DIRECT	GO:0007189~adenylate cyclase-activating G protein-coupled receptor signaling pathway	8	1.08401	0.204141	LHCGR, CALCRL, ADGRG5, AKAP6, LPAR3, RAMP1, ADCY6, TCP11	681	139	19734	1.6678	1	1	0.994133
GOTERM_BP_DIRECT	GO:0071805~potassium ion transmembrane transport	8	1.08401	0.204141	KCNH4, SLC9A7, KCNK12, KCNH8, KCNA5, TMEM38A, KCNK1, SLC12A7	681	139	19734	1.6678	1	1	0.994133
GOTERM_BP_DIRECT	GO:0007611~learning or memory	5	0.677507	0.206819	GPI, MEF2C, SRC, GRIN2B, AFF2	681	68	19734	2.13073	1	1	0.994133
GOTERM_BP_DIRECT	GO:0030334~regulation of cell migration	7	0.948509	0.211157	FGF17, FGF9, TMSB4X, TMSB15B, LAMA3, RAC2, PLXNA4	681	116	19734	1.74867	1	1	0.994133
GOTERM_BP_DIRECT	GO:0035329~hippo signaling	3	0.406504	0.212473	WWOX, PLEKHA5, DCHS1	681	25	19734	3.47736	1	1	0.994133
GOTERM_BP_DIRECT	GO:0071280~cellular response to copper ion	3	0.406504	0.212473	MT1F, MT1X, SNCA	681	25	19734	3.47736	1	1	0.994133
GOTERM_BP_DIRECT	GO:0043303~mast cell degranulation	3	0.406504	0.212473	NR4A3, FCER1A, CPLX2	681	25	19734	3.47736	1	1	0.994133
GOTERM_BP_DIRECT	GO:0045332~phospholipid translocation	3	0.406504	0.212473	ABCC1, ATP10B, ATP10A	681	25	19734	3.47736	1	1	0.994133
GOTERM_BP_DIRECT	GO:0046928~regulation of neurotransmitter secretion	3	0.406504	0.212473	MEF2C, SNCAIP, CPLX2	681	25	19734	3.47736	1	1	0.994133
GOTERM_BP_DIRECT	GO:0006637~acyl-CoA metabolic process	3	0.406504	0.212473	ACOT12, ACSM6, GLYAT	681	25	19734	3.47736	1	1	0.994133
GOTERM_BP_DIRECT	GO:0006812~monoatomic cation transport	3	0.406504	0.212473	PIEZO2, CNGB3, GRIN1	681	25	19734	3.47736	1	1	0.994133
GOTERM_BP_DIRECT	GO:0002053~positive regulation of mesenchymal cell proliferation	3	0.406504	0.212473	FGF9, PDGFA, FGFR1	681	25	19734	3.47736	1	1	0.994133
GOTERM_BP_DIRECT	GO:0071560~cellular response to transforming growth factor beta stimulus	5	0.677507	0.214058	WWOX, MEF2C, SFRP1, YES1, FYN	681	69	19734	2.09985	1	1	0.994133
GOTERM_BP_DIRECT	GO:0022898~regulation of transmembrane transporter activity	2	0.271003	0.217687	BCL2, SNCA	681	7	19734	8.27942	1	1	0.994133
GOTERM_BP_DIRECT	GO:0071870~cellular response to catecholamine stimulus	2	0.271003	0.217687	NR4A3, ADCY6	681	7	19734	8.27942	1	1	0.994133
GOTERM_BP_DIRECT	GO:1900744~regulation of p38MAPK cascade	2	0.271003	0.217687	CAV3, HGF	681	7	19734	8.27942	1	1	0.994133
GOTERM_BP_DIRECT	GO:0060463~lung lobe morphogenesis	2	0.271003	0.217687	LIF, GRHL2	681	7	19734	8.27942	1	1	0.994133
GOTERM_BP_DIRECT	GO:0035425~autocrine signaling	2	0.271003	0.217687	S100A9, S100A8	681	7	19734	8.27942	1	1	0.994133
GOTERM_BP_DIRECT	GO:0048864~stem cell development	2	0.271003	0.217687	BCL2, MSI2	681	7	19734	8.27942	1	1	0.994133
GOTERM_BP_DIRECT	GO:0061002~negative regulation of dendritic spine morphogenesis	2	0.271003	0.217687	DNM3, NGEF	681	7	19734	8.27942	1	1	0.994133
GOTERM_BP_DIRECT	GO:0035995~detection of muscle stretch	2	0.271003	0.217687	CAV3, PTK2	681	7	19734	8.27942	1	1	0.994133
GOTERM_BP_DIRECT	GO:0010573~vascular endothelial growth factor production	2	0.271003	0.217687	IL6, IL1B	681	7	19734	8.27942	1	1	0.994133
GOTERM_BP_DIRECT	GO:0014902~myotube differentiation	2	0.271003	0.217687	MEF2C, AVPR1A	681	7	19734	8.27942	1	1	0.994133
GOTERM_BP_DIRECT	GO:0060267~positive regulation of respiratory burst	2	0.271003	0.217687	CAMK1D, JCHAIN	681	7	19734	8.27942	1	1	0.994133
GOTERM_BP_DIRECT	GO:0061469~regulation of type B pancreatic cell proliferation	2	0.271003	0.217687	NR4A1, NR4A3	681	7	19734	8.27942	1	1	0.994133
GOTERM_BP_DIRECT	GO:0071447~cellular response to hydroperoxide	2	0.271003	0.217687	DAPK1, PRKD1	681	7	19734	8.27942	1	1	0.994133
GOTERM_BP_DIRECT	GO:0140507~granzyme-mediated programmed cell death signaling pathway	2	0.271003	0.217687	SRGN, NKG7	681	7	19734	8.27942	1	1	0.994133
GOTERM_BP_DIRECT	GO:0032494~response to peptidoglycan	2	0.271003	0.217687	IL6, INAVA	681	7	19734	8.27942	1	1	0.994133
GOTERM_BP_DIRECT	GO:0006828~manganese ion transport	2	0.271003	0.217687	SLC41A2, ATP2C2	681	7	19734	8.27942	1	1	0.994133
GOTERM_BP_DIRECT	GO:0099105~ion channel modulating, G protein-coupled receptor signaling pathway	2	0.271003	0.217687	ITPR1, PLCB1	681	7	19734	8.27942	1	1	0.994133
GOTERM_BP_DIRECT	GO:0043266~regulation of potassium ion transport	2	0.271003	0.217687	KCNA5, ANK3	681	7	19734	8.27942	1	1	0.994133
GOTERM_BP_DIRECT	GO:0034775~glutathione transmembrane transport	2	0.271003	0.217687	ABCC4, ABCC1	681	7	19734	8.27942	1	1	0.994133
GOTERM_BP_DIRECT	GO:0007379~segment specification	2	0.271003	0.217687	HOXA2, MLLT3	681	7	19734	8.27942	1	1	0.994133
GOTERM_BP_DIRECT	GO:0071716~leukotriene transport	2	0.271003	0.217687	ABCC4, ABCC1	681	7	19734	8.27942	1	1	0.994133
GOTERM_BP_DIRECT	GO:0050882~voluntary musculoskeletal movement	2	0.271003	0.217687	MAP1A, ITPR1	681	7	19734	8.27942	1	1	0.994133
GOTERM_BP_DIRECT	GO:0061470~T follicular helper cell differentiation	2	0.271003	0.217687	IL6, GPR183	681	7	19734	8.27942	1	1	0.994133
GOTERM_BP_DIRECT	GO:0001878~response to yeast	2	0.271003	0.217687	MPO, ELANE	681	7	19734	8.27942	1	1	0.994133
GOTERM_BP_DIRECT	GO:0045920~negative regulation of exocytosis	2	0.271003	0.217687	IL1RAPL1, SNCA	681	7	19734	8.27942	1	1	0.994133
GOTERM_BP_DIRECT	GO:0032927~positive regulation of activin receptor signaling pathway	2	0.271003	0.217687	FGF9, ACVR2A	681	7	19734	8.27942	1	1	0.994133
GOTERM_BP_DIRECT	GO:0098655~monoatomic cation transmembrane transport	4	0.542005	0.219793	PIEZO2, CNGB3, GRIN2B, GRIN1	681	47	19734	2.46621	1	1	0.994133
GOTERM_BP_DIRECT	GO:0045860~positive regulation of protein kinase activity	4	0.542005	0.219793	TRAF4, PRKAG2, AZU1, PTK2	681	47	19734	2.46621	1	1	0.994133
GOTERM_BP_DIRECT	GO:0010842~retina layer formation	3	0.406504	0.225274	PTPRM, PROM1, SDK2	681	26	19734	3.34361	1	1	0.994133
GOTERM_BP_DIRECT	GO:0050900~leukocyte migration	3	0.406504	0.225274	YES1, SRC, FYN	681	26	19734	3.34361	1	1	0.994133
GOTERM_BP_DIRECT	GO:0003007~heart morphogenesis	4	0.542005	0.228929	SYNPO2L, FKBP1C, ALPK2, PTK2	681	48	19734	2.41483	1	1	0.994133
GOTERM_BP_DIRECT	GO:0001701~in utero embryonic development	11	1.49051	0.233184	ACVR1, GPI, CHST11, ANGPT1, TIE1, GNA12, MAFF, HSD17B2, GLI2, FGFR1, DPEP3	681	221	19734	1.44234	1	1	0.994133
GOTERM_BP_DIRECT	GO:0021766~hippocampus development	5	0.677507	0.236171	ALK, KIRREL3, MAS1, ANXA3, SCT	681	72	19734	2.01236	1	1	0.994133
GOTERM_BP_DIRECT	GO:0072332~intrinsic apoptotic signaling pathway by p53 class mediator	3	0.406504	0.238129	WWOX, FHIT, POU4F1	681	27	19734	3.21977	1	1	0.994133
GOTERM_BP_DIRECT	GO:0090023~positive regulation of neutrophil chemotaxis	3	0.406504	0.238129	CAMK1D, RAC2, THBS4	681	27	19734	3.21977	1	1	0.994133
GOTERM_BP_DIRECT	GO:2001243~negative regulation of intrinsic apoptotic signaling pathway	3	0.406504	0.238129	SRC, BCL2, MMP9	681	27	19734	3.21977	1	1	0.994133
GOTERM_BP_DIRECT	GO:2000060~positive regulation of ubiquitin-dependent protein catabolic process	3	0.406504	0.238129	CAV3, EGF, PTK2	681	27	19734	3.21977	1	1	0.994133
GOTERM_BP_DIRECT	GO:1904753~negative regulation of vascular associated smooth muscle cell migration	3	0.406504	0.238129	MEF2C, TAFA5, GNA12	681	27	19734	3.21977	1	1	0.994133
GOTERM_BP_DIRECT	GO:0006096~glycolytic process	4	0.542005	0.238134	GPI, HK3, PKM, ALDOC	681	49	19734	2.36555	1	1	0.994133
GOTERM_BP_DIRECT	GO:0042127~regulation of cell population proliferation	8	1.08401	0.244429	GUCY2C, ALK, CHST11, AVPR1B, STAT4, TSPO, PTK2, S100A11	681	147	19734	1.57703	1	1	0.994133
GOTERM_BP_DIRECT	GO:0006824~cobalt ion transport	2	0.271003	0.244653	TCN1, SLC41A2	681	8	19734	7.24449	1	1	0.994133
GOTERM_BP_DIRECT	GO:1904062~regulation of monoatomic cation transmembrane transport	2	0.271003	0.244653	GRIN2B, GRIN1	681	8	19734	7.24449	1	1	0.994133
GOTERM_BP_DIRECT	GO:0071636~positive regulation of transforming growth factor beta production	2	0.271003	0.244653	PTGS2, CD200	681	8	19734	7.24449	1	1	0.994133
GOTERM_BP_DIRECT	GO:1904117~cellular response to vasopressin	2	0.271003	0.244653	PLCB1, ADCY6	681	8	19734	7.24449	1	1	0.994133
GOTERM_BP_DIRECT	GO:2001056~positive regulation of cysteine-type endopeptidase activity	2	0.271003	0.244653	FYN, GRIN2B	681	8	19734	7.24449	1	1	0.994133
GOTERM_BP_DIRECT	GO:0010827~regulation of glucose transmembrane transport	2	0.271003	0.244653	YES1, TRIB3	681	8	19734	7.24449	1	1	0.994133
GOTERM_BP_DIRECT	GO:0009743~response to carbohydrate	2	0.271003	0.244653	P2RX3, IL1B	681	8	19734	7.24449	1	1	0.994133
GOTERM_BP_DIRECT	GO:0007207~phospholipase C-activating G protein-coupled acetylcholine receptor signaling pathway	2	0.271003	0.244653	ITPR1, PLCB1	681	8	19734	7.24449	1	1	0.994133
GOTERM_BP_DIRECT	GO:0021516~dorsal spinal cord development	2	0.271003	0.244653	DAAM2, PBX3	681	8	19734	7.24449	1	1	0.994133
GOTERM_BP_DIRECT	GO:0007172~signal complex assembly	2	0.271003	0.244653	SRC, PTK2	681	8	19734	7.24449	1	1	0.994133
GOTERM_BP_DIRECT	GO:0030070~insulin processing	2	0.271003	0.244653	SLC30A8, P4HB	681	8	19734	7.24449	1	1	0.994133
GOTERM_BP_DIRECT	GO:0030853~negative regulation of granulocyte differentiation	2	0.271003	0.244653	ZBTB46, PRDM16	681	8	19734	7.24449	1	1	0.994133
GOTERM_BP_DIRECT	GO:0050691~regulation of defense response to virus by host	2	0.271003	0.244653	IL15, IL1B	681	8	19734	7.24449	1	1	0.994133
GOTERM_BP_DIRECT	GO:0070782~phosphatidylserine exposure on apoptotic cell surface	2	0.271003	0.244653	XKR4, XKR5	681	8	19734	7.24449	1	1	0.994133
GOTERM_BP_DIRECT	GO:0038134~ERBB2-EGFR signaling pathway	2	0.271003	0.244653	EGF, HBEGF	681	8	19734	7.24449	1	1	0.994133
GOTERM_BP_DIRECT	GO:0010466~negative regulation of peptidase activity	2	0.271003	0.244653	CSTA, CST7	681	8	19734	7.24449	1	1	0.994133
GOTERM_BP_DIRECT	GO:0008285~negative regulation of cell population proliferation	19	2.57453	0.245279	SMAD1, LIF, OSM, WNT9A, PTGS2, TMEM196, CBFA2T3, ST18, SULT2B1, IL6, SFRP1, SFRP2, WT1, IL1B, IFNK, SH3BP4, S100A11, CD200, HSPA1A	681	434	19734	1.26862	1	1	0.994133
GOTERM_BP_DIRECT	GO:0008202~steroid metabolic process	4	0.542005	0.247401	SULT2B1, HSD17B2, TSPO, AKR1C4	681	50	19734	2.31824	1	1	0.994133
GOTERM_BP_DIRECT	GO:0034198~cellular response to amino acid starvation	4	0.542005	0.247401	PRKCH, PRKD1, RNF152, ATF3	681	50	19734	2.31824	1	1	0.994133
GOTERM_BP_DIRECT	GO:0051384~response to glucocorticoid	4	0.542005	0.247401	IL6, ANXA3, BCL2, PTGS2	681	50	19734	2.31824	1	1	0.994133
GOTERM_BP_DIRECT	GO:0050918~positive chemotaxis	4	0.542005	0.247401	SEMA5A, ANGPT1, HGF, FPR2	681	50	19734	2.31824	1	1	0.994133
GOTERM_BP_DIRECT	GO:0006094~gluconeogenesis	4	0.542005	0.247401	GPI, SDS, ALDOC, ATF3	681	50	19734	2.31824	1	1	0.994133
GOTERM_BP_DIRECT	GO:0043536~positive regulation of blood vessel endothelial cell migration	4	0.542005	0.247401	ANGPT1, TMSB4X, PRKD1, FGFR1	681	50	19734	2.31824	1	1	0.994133
GOTERM_BP_DIRECT	GO:0010800~positive regulation of peptidyl-threonine phosphorylation	3	0.406504	0.25102	EGF, PRKAG2, AZU1	681	28	19734	3.10478	1	1	0.994133
GOTERM_BP_DIRECT	GO:0009888~tissue development	3	0.406504	0.25102	WT1, LAMA3, NTN5	681	28	19734	3.10478	1	1	0.994133
GOTERM_BP_DIRECT	GO:0034341~response to type II interferon	3	0.406504	0.25102	CIITA, SLC30A8, SNCA	681	28	19734	3.10478	1	1	0.994133
GOTERM_BP_DIRECT	GO:0007520~myoblast fusion	3	0.406504	0.25102	TANC1, CAV3, DOCK1	681	28	19734	3.10478	1	1	0.994133
GOTERM_BP_DIRECT	GO:0030036~actin cytoskeleton organization	11	1.49051	0.254724	PDLIM1, SIPA1L1, AUTS2, DAAM2, ITPKA, PDGFA, FLNB, PHACTR1, TNIK, ARPC5, ARHGAP26	681	226	19734	1.41043	1	1	0.994133
GOTERM_BP_DIRECT	GO:0042981~regulation of apoptotic process	11	1.49051	0.254724	ALK, SDF2L1, TRAF4, FLT3, DAPK1, NLRC4, ALPK2, CALR, CARD11, DYNAP, BCL2L15	681	226	19734	1.41043	1	1	0.994133
GOTERM_BP_DIRECT	GO:0010951~negative regulation of endopeptidase activity	4	0.542005	0.256722	SERPINB10, SPOCK3, SERPINI2, KNG1	681	51	19734	2.27278	1	1	0.994133
GOTERM_BP_DIRECT	GO:0009968~negative regulation of signal transduction	4	0.542005	0.256722	SOCS2, ACVR1, UBASH3B, RGS6	681	51	19734	2.27278	1	1	0.994133
GOTERM_BP_DIRECT	GO:0007162~negative regulation of cell adhesion	4	0.542005	0.256722	SEMA5A, ANGPT1, PLXNA4, KNG1	681	51	19734	2.27278	1	1	0.994133
GOTERM_BP_DIRECT	GO:0007179~transforming growth factor beta receptor signaling pathway	6	0.813008	0.262226	ACVR1, SMAD1, CHST11, SRC, ITGB8, PTK2	681	100	19734	1.73868	1	1	0.994133
GOTERM_BP_DIRECT	GO:0017148~negative regulation of translation	6	0.813008	0.262226	PRKCH, WT1, DAPK1, IGF2BP3, IGF2BP2, CALR	681	100	19734	1.73868	1	1	0.994133
GOTERM_BP_DIRECT	GO:0006699~bile acid biosynthetic process	3	0.406504	0.263928	OSBPL3, AKR1C4, CYP46A1	681	29	19734	2.99772	1	1	0.994133
GOTERM_BP_DIRECT	GO:0090303~positive regulation of wound healing	3	0.406504	0.263928	PRKCE, PTK2, HBEGF	681	29	19734	2.99772	1	1	0.994133
GOTERM_BP_DIRECT	GO:0048041~focal adhesion assembly	3	0.406504	0.263928	SRC, BCL2, SORBS1	681	29	19734	2.99772	1	1	0.994133
GOTERM_BP_DIRECT	GO:0009880~embryonic pattern specification	3	0.406504	0.263928	SMAD1, MEIS1, SATB2	681	29	19734	2.99772	1	1	0.994133
GOTERM_BP_DIRECT	GO:0045742~positive regulation of epidermal growth factor receptor signaling pathway	3	0.406504	0.263928	PDE6H, MMP9, FAM83B	681	29	19734	2.99772	1	1	0.994133
GOTERM_BP_DIRECT	GO:0043524~negative regulation of neuron apoptotic process	8	1.08401	0.265448	GPI, MEF2C, MAG, ANGPT1, BCL2, GBA1, POU4F1, SNCA	681	151	19734	1.53526	1	1	0.994133
GOTERM_BP_DIRECT	GO:0051496~positive regulation of stress fiber assembly	4	0.542005	0.266089	CARMIL1, SFRP1, SYNPO2L, TACR1	681	52	19734	2.22907	1	1	0.994133
GOTERM_BP_DIRECT	GO:0001775~cell activation	2	0.271003	0.270692	PDGFA, CD24	681	9	19734	6.43955	1	1	0.994133
GOTERM_BP_DIRECT	GO:0046888~negative regulation of hormone secretion	2	0.271003	0.270692	OSM, LIF	681	9	19734	6.43955	1	1	0.994133
GOTERM_BP_DIRECT	GO:0042403~thyroid hormone metabolic process	2	0.271003	0.270692	SULT1B1, CRYM	681	9	19734	6.43955	1	1	0.994133
GOTERM_BP_DIRECT	GO:0097553~calcium ion transmembrane import into cytosol	2	0.271003	0.270692	GRIN2B, GRIN1	681	9	19734	6.43955	1	1	0.994133
GOTERM_BP_DIRECT	GO:0071376~cellular response to corticotropin-releasing hormone stimulus	2	0.271003	0.270692	NR4A1, NR4A3	681	9	19734	6.43955	1	1	0.994133
GOTERM_BP_DIRECT	GO:0006690~icosanoid metabolic process	2	0.271003	0.270692	CYP2S1, CYP4F3	681	9	19734	6.43955	1	1	0.994133
GOTERM_BP_DIRECT	GO:0022417~protein maturation by protein folding	2	0.271003	0.270692	FKBP1C, CALR	681	9	19734	6.43955	1	1	0.994133
GOTERM_BP_DIRECT	GO:0035590~purinergic nucleotide receptor signaling pathway	2	0.271003	0.270692	P2RX3, CTSG	681	9	19734	6.43955	1	1	0.994133
GOTERM_BP_DIRECT	GO:0002237~response to molecule of bacterial origin	2	0.271003	0.270692	CD24, CXCL2	681	9	19734	6.43955	1	1	0.994133
GOTERM_BP_DIRECT	GO:0090279~regulation of calcium ion import	2	0.271003	0.270692	CAV3, EGF	681	9	19734	6.43955	1	1	0.994133
GOTERM_BP_DIRECT	GO:0051639~actin filament network formation	2	0.271003	0.270692	CARMIL1, COBL	681	9	19734	6.43955	1	1	0.994133
GOTERM_BP_DIRECT	GO:2000650~negative regulation of sodium ion transmembrane transporter activity	2	0.271003	0.270692	PRKCE, PCSK9	681	9	19734	6.43955	1	1	0.994133
GOTERM_BP_DIRECT	GO:0035739~CD4-positive, alpha-beta T cell proliferation	2	0.271003	0.270692	PRKCQ, CARD11	681	9	19734	6.43955	1	1	0.994133
GOTERM_BP_DIRECT	GO:0010042~response to manganese ion	2	0.271003	0.270692	TSPO, PTGS2	681	9	19734	6.43955	1	1	0.994133
GOTERM_BP_DIRECT	GO:1903140~regulation of establishment of endothelial barrier	2	0.271003	0.270692	IL1B, PLCB1	681	9	19734	6.43955	1	1	0.994133
GOTERM_BP_DIRECT	GO:0035726~common myeloid progenitor cell proliferation	2	0.271003	0.270692	NR4A3, FLT3	681	9	19734	6.43955	1	1	0.994133
GOTERM_BP_DIRECT	GO:1990806~ligand-gated ion channel signaling pathway	2	0.271003	0.270692	ITPR1, PLCB1	681	9	19734	6.43955	1	1	0.994133
GOTERM_BP_DIRECT	GO:0010738~regulation of protein kinase A signaling	2	0.271003	0.270692	AKAP12, AKAP6	681	9	19734	6.43955	1	1	0.994133
GOTERM_BP_DIRECT	GO:0048672~positive regulation of collateral sprouting	2	0.271003	0.270692	LPAR3, EFNA5	681	9	19734	6.43955	1	1	0.994133
GOTERM_BP_DIRECT	GO:0002544~chronic inflammatory response	2	0.271003	0.270692	S100A9, S100A8	681	9	19734	6.43955	1	1	0.994133
GOTERM_BP_DIRECT	GO:0071260~cellular response to mechanical stimulus	5	0.677507	0.274102	MAG, GADD45A, IL1B, PIEZO2, PTGS2	681	77	19734	1.88169	1	1	0.994133
GOTERM_BP_DIRECT	GO:0048015~phosphatidylinositol-mediated signaling	3	0.406504	0.276837	PLCB1, FGFR1, PIK3C2B	681	30	19734	2.8978	1	1	0.994133
GOTERM_BP_DIRECT	GO:0015721~bile acid and bile salt transport	3	0.406504	0.276837	SLC10A4, ABCC4, AKR1C4	681	30	19734	2.8978	1	1	0.994133
GOTERM_BP_DIRECT	GO:0071773~cellular response to BMP stimulus	3	0.406504	0.276837	ACVR1, SFRP1, ACVR2A	681	30	19734	2.8978	1	1	0.994133
GOTERM_BP_DIRECT	GO:0071902~positive regulation of protein serine/threonine kinase activity	3	0.406504	0.276837	SRC, LTF, SNCA	681	30	19734	2.8978	1	1	0.994133
GOTERM_BP_DIRECT	GO:0099560~synaptic membrane adhesion	3	0.406504	0.276837	IL1RAPL1, LRRC4, EFNA5	681	30	19734	2.8978	1	1	0.994133
GOTERM_BP_DIRECT	GO:0001837~epithelial to mesenchymal transition	4	0.542005	0.284937	HGF, RFLNB, SNAI1, FGFR1	681	54	19734	2.14652	1	1	0.994133
GOTERM_BP_DIRECT	GO:0030512~negative regulation of transforming growth factor beta receptor signaling pathway	7	0.948509	0.285706	CHST11, FKBP1C, VEPH1, CD109, PRDM16, HTRA4, HSPA1A	681	129	19734	1.57245	1	1	0.994133
GOTERM_BP_DIRECT	GO:0006919~activation of cysteine-type endopeptidase activity involved in apoptotic process	5	0.677507	0.289557	BCL2, NLRC4, S100A9, S100A8, SNCA	681	79	19734	1.83405	1	1	0.994133
GOTERM_BP_DIRECT	GO:0043122~regulation of canonical NF-kappaB signal transduction	3	0.406504	0.289732	TRAF4, ANGPT1, IL1B	681	31	19734	2.80432	1	1	0.994133
GOTERM_BP_DIRECT	GO:0051281~positive regulation of release of sequestered calcium ion into cytosol	3	0.406504	0.289732	LHCGR, AKAP6, SNCA	681	31	19734	2.80432	1	1	0.994133
GOTERM_BP_DIRECT	GO:0045740~positive regulation of DNA replication	3	0.406504	0.289732	MAS1, NPM2, GLI2	681	31	19734	2.80432	1	1	0.994133
GOTERM_BP_DIRECT	GO:0002682~regulation of immune system process	4	0.542005	0.294403	CEACAM6, CEACAM5, PSG6, CEACAM8	681	55	19734	2.10749	1	1	0.994133
GOTERM_BP_DIRECT	GO:0016311~dephosphorylation	6	0.813008	0.295498	DUSP5, PTP4A3, DNAJC6, PTPN20, PTPRM, CDC14B	681	105	19734	1.65588	1	1	0.994133
GOTERM_BP_DIRECT	GO:0032835~glomerulus development	2	0.271003	0.295834	WT1, BCL2	681	10	19734	5.79559	1	1	0.994133
GOTERM_BP_DIRECT	GO:0038060~nitric oxide-cGMP-mediated signaling	2	0.271003	0.295834	GUCY1A1, GUCY1B1	681	10	19734	5.79559	1	1	0.994133
GOTERM_BP_DIRECT	GO:0046415~urate metabolic process	2	0.271003	0.295834	SLC22A12, CARMIL1	681	10	19734	5.79559	1	1	0.994133
GOTERM_BP_DIRECT	GO:0042355~L-fucose catabolic process	2	0.271003	0.295834	FUT2, FUT4	681	10	19734	5.79559	1	1	0.994133
GOTERM_BP_DIRECT	GO:0071803~positive regulation of podosome assembly	2	0.271003	0.295834	IL5, SRC	681	10	19734	5.79559	1	1	0.994133
GOTERM_BP_DIRECT	GO:0070383~DNA cytosine deamination	2	0.271003	0.295834	APOBEC3H, APOBEC3B	681	10	19734	5.79559	1	1	0.994133
GOTERM_BP_DIRECT	GO:0070233~negative regulation of T cell apoptotic process	2	0.271003	0.295834	BCL2, PRKCQ	681	10	19734	5.79559	1	1	0.994133
GOTERM_BP_DIRECT	GO:0048703~embryonic viscerocranium morphogenesis	2	0.271003	0.295834	CHST11, HOXA2	681	10	19734	5.79559	1	1	0.994133
GOTERM_BP_DIRECT	GO:0030033~microvillus assembly	2	0.271003	0.295834	KLF5, TNIK	681	10	19734	5.79559	1	1	0.994133
GOTERM_BP_DIRECT	GO:0071481~cellular response to X-ray	2	0.271003	0.295834	SFRP1, SFRP2	681	10	19734	5.79559	1	1	0.994133
GOTERM_BP_DIRECT	GO:0140115~export across plasma membrane	2	0.271003	0.295834	ABCC4, ABCC1	681	10	19734	5.79559	1	1	0.994133
GOTERM_BP_DIRECT	GO:0031915~positive regulation of synaptic plasticity	2	0.271003	0.295834	CPLX2, PTGS2	681	10	19734	5.79559	1	1	0.994133
GOTERM_BP_DIRECT	GO:0034109~homotypic cell-cell adhesion	2	0.271003	0.295834	CEACAM5, XG	681	10	19734	5.79559	1	1	0.994133
GOTERM_BP_DIRECT	GO:0015918~sterol transport	2	0.271003	0.295834	TSPO, PLTP	681	10	19734	5.79559	1	1	0.994133
GOTERM_BP_DIRECT	GO:2000563~positive regulation of CD4-positive, alpha-beta T cell proliferation	2	0.271003	0.295834	PRKCQ, CARD11	681	10	19734	5.79559	1	1	0.994133
GOTERM_BP_DIRECT	GO:2000810~regulation of bicellular tight junction assembly	2	0.271003	0.295834	PRKCH, SNAI1	681	10	19734	5.79559	1	1	0.994133
GOTERM_BP_DIRECT	GO:0007420~brain development	10	1.35501	0.299862	FOXR1, MEIS1, IMMP2L, RTN1, SCT, PBX3, GRHL2, GRIN2B, GRIN1, AFF2	681	210	19734	1.3799	1	1	0.994133
GOTERM_BP_DIRECT	GO:2000463~positive regulation of excitatory postsynaptic potential	3	0.406504	0.302598	GRIN2B, SHANK3, GRIN1	681	32	19734	2.71669	1	1	0.994133
GOTERM_BP_DIRECT	GO:0048706~embryonic skeletal system development	3	0.406504	0.302598	FGF9, HOXA6, ACVR2A	681	32	19734	2.71669	1	1	0.994133
GOTERM_BP_DIRECT	GO:0008306~associative learning	3	0.406504	0.302598	MAP1A, TACR1, SHANK3	681	32	19734	2.71669	1	1	0.994133
GOTERM_BP_DIRECT	GO:0043627~response to estrogen	4	0.542005	0.303888	F7, CITED4, GBA1, CD24	681	56	19734	2.06986	1	1	0.994133
GOTERM_BP_DIRECT	GO:0010718~positive regulation of epithelial to mesenchymal transition	4	0.542005	0.303888	IL6, IL1B, SNAI1, PTK2	681	56	19734	2.06986	1	1	0.994133
GOTERM_BP_DIRECT	GO:0045671~negative regulation of osteoclast differentiation	3	0.406504	0.315422	SFRP1, UBASH3B, TMEM178A	681	33	19734	2.63436	1	1	0.994133
GOTERM_BP_DIRECT	GO:0051973~positive regulation of telomerase activity	3	0.406504	0.315422	PKIB, PRKCQ, GRHL2	681	33	19734	2.63436	1	1	0.994133
GOTERM_BP_DIRECT	GO:0048469~cell maturation	3	0.406504	0.315422	IL15, GBA1, FGFR1	681	33	19734	2.63436	1	1	0.994133
GOTERM_BP_DIRECT	GO:0098656~monoatomic anion transmembrane transport	3	0.406504	0.315422	ABCC4, ABCC1, LRRC8B	681	33	19734	2.63436	1	1	0.994133
GOTERM_BP_DIRECT	GO:0060045~positive regulation of cardiac muscle cell proliferation	3	0.406504	0.315422	MEF2C, FGF9, FGFR1	681	33	19734	2.63436	1	1	0.994133
GOTERM_BP_DIRECT	GO:0044344~cellular response to fibroblast growth factor stimulus	3	0.406504	0.315422	NR4A1, SFRP1, FGFR1	681	33	19734	2.63436	1	1	0.994133
GOTERM_BP_DIRECT	GO:0045471~response to ethanol	6	0.813008	0.315791	G6PD, FYN, TACR1, GRIN2B, S100A8, GRIN1	681	108	19734	1.60989	1	1	0.994133
GOTERM_BP_DIRECT	GO:0006468~protein phosphorylation	16	2.16802	0.31945	ACVR1, YES1, PRKCH, DAPK1, SRC, PRKCE, PRKAG2, PTK2, ACVR2A, FYN, CTSG, PRKCQ, TNIK, HCST, EPHB1, FGFR1	681	376	19734	1.23311	1	1	0.994133
GOTERM_BP_DIRECT	GO:0048660~regulation of smooth muscle cell proliferation	2	0.271003	0.320111	NR4A3, TACR1	681	11	19734	5.26872	1	1	0.994133
GOTERM_BP_DIRECT	GO:0015747~urate transport	2	0.271003	0.320111	SLC22A12, ABCC4	681	11	19734	5.26872	1	1	0.994133
GOTERM_BP_DIRECT	GO:0035723~interleukin-15-mediated signaling pathway	2	0.271003	0.320111	IL15, PLCB1	681	11	19734	5.26872	1	1	0.994133
GOTERM_BP_DIRECT	GO:2000035~regulation of stem cell division	2	0.271003	0.320111	SFRP2, MLLT3	681	11	19734	5.26872	1	1	0.994133
GOTERM_BP_DIRECT	GO:1902742~apoptotic process involved in development	2	0.271003	0.320111	XKR4, XKR5	681	11	19734	5.26872	1	1	0.994133
GOTERM_BP_DIRECT	GO:1901222~regulation of non-canonical NF-kappaB signal transduction	2	0.271003	0.320111	EDA, IL1B	681	11	19734	5.26872	1	1	0.994133
GOTERM_BP_DIRECT	GO:0016051~carbohydrate biosynthetic process	2	0.271003	0.320111	CHST11, ST8SIA6	681	11	19734	5.26872	1	1	0.994133
GOTERM_BP_DIRECT	GO:0002903~negative regulation of B cell apoptotic process	2	0.271003	0.320111	BCL2, PDCD1	681	11	19734	5.26872	1	1	0.994133
GOTERM_BP_DIRECT	GO:1904044~response to aldosterone	2	0.271003	0.320111	CYBB, SH3RF1	681	11	19734	5.26872	1	1	0.994133
GOTERM_BP_DIRECT	GO:0036065~fucosylation	2	0.271003	0.320111	FUT2, FUT4	681	11	19734	5.26872	1	1	0.994133
GOTERM_BP_DIRECT	GO:0080090~regulation of primary metabolic process	2	0.271003	0.320111	PRKCH, PRKCE	681	11	19734	5.26872	1	1	0.994133
GOTERM_BP_DIRECT	GO:0070934~CRD-mediated mRNA stabilization	2	0.271003	0.320111	IGF2BP3, IGF2BP2	681	11	19734	5.26872	1	1	0.994133
GOTERM_BP_DIRECT	GO:1990776~response to angiotensin	2	0.271003	0.320111	CYBB, PTGS2	681	11	19734	5.26872	1	1	0.994133
GOTERM_BP_DIRECT	GO:0048711~positive regulation of astrocyte differentiation	2	0.271003	0.320111	MAG, LIF	681	11	19734	5.26872	1	1	0.994133
GOTERM_BP_DIRECT	GO:0051239~regulation of multicellular organismal process	2	0.271003	0.320111	ACVR1, PTK2	681	11	19734	5.26872	1	1	0.994133
GOTERM_BP_DIRECT	GO:0055064~chloride ion homeostasis	2	0.271003	0.320111	SLC12A1, SLC12A7	681	11	19734	5.26872	1	1	0.994133
GOTERM_BP_DIRECT	GO:0033033~negative regulation of myeloid cell apoptotic process	2	0.271003	0.320111	CLEC5A, BCL2	681	11	19734	5.26872	1	1	0.994133
GOTERM_BP_DIRECT	GO:0043117~positive regulation of vascular permeability	2	0.271003	0.320111	PTP4A3, TACR1	681	11	19734	5.26872	1	1	0.994133
GOTERM_BP_DIRECT	GO:0008347~glial cell migration	2	0.271003	0.320111	TSPO, AZU1	681	11	19734	5.26872	1	1	0.994133
GOTERM_BP_DIRECT	GO:0090179~planar cell polarity pathway involved in neural tube closure	2	0.271003	0.320111	SFRP1, SFRP2	681	11	19734	5.26872	1	1	0.994133
GOTERM_BP_DIRECT	GO:0009247~glycolipid biosynthetic process	2	0.271003	0.320111	ST8SIA6, GAL3ST2	681	11	19734	5.26872	1	1	0.994133
GOTERM_BP_DIRECT	GO:0051481~negative regulation of cytosolic calcium ion concentration	2	0.271003	0.320111	KCNA5, ATP2B1	681	11	19734	5.26872	1	1	0.994133
GOTERM_BP_DIRECT	GO:0043031~negative regulation of macrophage activation	2	0.271003	0.320111	BPI, CD200	681	11	19734	5.26872	1	1	0.994133
GOTERM_BP_DIRECT	GO:0045056~transcytosis	2	0.271003	0.320111	SRC, RAB17	681	11	19734	5.26872	1	1	0.994133
GOTERM_BP_DIRECT	GO:0141007~siRNA-mediated retrotransposon silencing by heterochromatin formation	2	0.271003	0.320111	MAEL, TDRD5	681	11	19734	5.26872	1	1	0.994133
GOTERM_BP_DIRECT	GO:0032680~regulation of tumor necrosis factor production	2	0.271003	0.320111	ANGPT1, LTF	681	11	19734	5.26872	1	1	0.994133
GOTERM_BP_DIRECT	GO:1902476~chloride transmembrane transport	6	0.813008	0.322596	OCA2, SLC12A1, SLC26A8, SLC4A3, SLC12A7, CLCN1	681	109	19734	1.59512	1	1	0.994133
GOTERM_BP_DIRECT	GO:0002062~chondrocyte differentiation	4	0.542005	0.32289	MEF2C, FGF9, GLI2, FGFR1	681	58	19734	1.99848	1	1	0.994133
GOTERM_BP_DIRECT	GO:0031397~negative regulation of protein ubiquitination	4	0.542005	0.32289	PRKCE, TSPO, FYN, HSPA1A	681	58	19734	1.99848	1	1	0.994133
GOTERM_BP_DIRECT	GO:0008543~fibroblast growth factor receptor signaling pathway	4	0.542005	0.32289	FGF17, FGF9, FLRT1, FGFR1	681	58	19734	1.99848	1	1	0.994133
GOTERM_BP_DIRECT	GO:0071363~cellular response to growth factor stimulus	4	0.542005	0.32289	ACVR1, SFRP1, CPNE3, ACVR2A	681	58	19734	1.99848	1	1	0.994133
GOTERM_BP_DIRECT	GO:0035987~endodermal cell differentiation	3	0.406504	0.328191	LAMA3, MMP8, MMP9	681	34	19734	2.55688	1	1	0.994133
GOTERM_BP_DIRECT	GO:0070507~regulation of microtubule cytoskeleton organization	3	0.406504	0.328191	PHLDB1, CEP70, EFNA5	681	34	19734	2.55688	1	1	0.994133
GOTERM_BP_DIRECT	GO:0042632~cholesterol homeostasis	6	0.813008	0.329417	CAV3, TSPO, PCSK9, MALRD1, CD24, HDAC9	681	110	19734	1.58062	1	1	0.994133
GOTERM_BP_DIRECT	GO:0045766~positive regulation of angiogenesis	8	1.08401	0.331016	SEMA5A, SFRP2, ANXA3, IL1B, TIE1, CYBB, ITGB8, PRKD1	681	163	19734	1.42223	1	1	0.994133
GOTERM_BP_DIRECT	GO:0045665~negative regulation of neuron differentiation	4	0.542005	0.332396	MAG, MEIS1, HOXA2, CALR	681	59	19734	1.96461	1	1	0.994133
GOTERM_BP_DIRECT	GO:0007612~learning	4	0.542005	0.332396	FYN, PLCB1, PTGS2, SHANK3	681	59	19734	1.96461	1	1	0.994133
GOTERM_BP_DIRECT	GO:0042475~odontogenesis of dentin-containing tooth	4	0.542005	0.332396	EDA, SOSTDC1, ACVR2A, GLI2	681	59	19734	1.96461	1	1	0.994133
GOTERM_BP_DIRECT	GO:0006816~calcium ion transport	5	0.677507	0.336499	CALCRL, CAV3, ITPR1, FYN, RAMP1	681	85	19734	1.70459	1	1	0.994133
GOTERM_BP_DIRECT	GO:0008360~regulation of cell shape	7	0.948509	0.340232	GNA12, RAC2, FYN, ATP10A, PLXNA4, PTK2, ERMN	681	138	19734	1.4699	1	1	0.994133
GOTERM_BP_DIRECT	GO:0001662~behavioral fear response	3	0.406504	0.340895	DPP4, BCL2, MORC1	681	35	19734	2.48383	1	1	0.994133
GOTERM_BP_DIRECT	GO:0050873~brown fat cell differentiation	3	0.406504	0.340895	PRDM16, METRNL, PTGS2	681	35	19734	2.48383	1	1	0.994133
GOTERM_BP_DIRECT	GO:0070059~intrinsic apoptotic signaling pathway in response to endoplasmic reticulum stress	3	0.406504	0.340895	BCL2, ITPR1, TRIB3	681	35	19734	2.48383	1	1	0.994133
GOTERM_BP_DIRECT	GO:0006882~intracellular zinc ion homeostasis	3	0.406504	0.340895	SLC30A8, MT1F, MT1X	681	35	19734	2.48383	1	1	0.994133
GOTERM_BP_DIRECT	GO:0001707~mesoderm formation	3	0.406504	0.340895	ACVR1, GPI, SNAI1	681	35	19734	2.48383	1	1	0.994133
GOTERM_BP_DIRECT	GO:0042110~T cell activation	4	0.542005	0.341896	DPP4, CD86, FKBP1C, ICOSLG	681	60	19734	1.93186	1	1	0.994133
GOTERM_BP_DIRECT	GO:0030195~negative regulation of blood coagulation	2	0.271003	0.343552	PROC, KNG1	681	12	19734	4.82966	1	1	0.994133
GOTERM_BP_DIRECT	GO:2000146~negative regulation of cell motility	2	0.271003	0.343552	SPOCK3, TACSTD2	681	12	19734	4.82966	1	1	0.994133
GOTERM_BP_DIRECT	GO:0060707~trophoblast giant cell differentiation	2	0.271003	0.343552	SNAI1, LIF	681	12	19734	4.82966	1	1	0.994133
GOTERM_BP_DIRECT	GO:0007096~regulation of exit from mitosis	2	0.271003	0.343552	NPM2, CDC14B	681	12	19734	4.82966	1	1	0.994133
GOTERM_BP_DIRECT	GO:0035332~positive regulation of hippo signaling	2	0.271003	0.343552	IQCJ-SCHIP1, SCHIP1	681	12	19734	4.82966	1	1	0.994133
GOTERM_BP_DIRECT	GO:0048668~collateral sprouting	2	0.271003	0.343552	LPAR3, EFNA5	681	12	19734	4.82966	1	1	0.994133
GOTERM_BP_DIRECT	GO:0051926~negative regulation of calcium ion transport	2	0.271003	0.343552	CAV3, PTGS2	681	12	19734	4.82966	1	1	0.994133
GOTERM_BP_DIRECT	GO:0018095~protein polyglutamylation	2	0.271003	0.343552	TTLL6, TTLL9	681	12	19734	4.82966	1	1	0.994133
GOTERM_BP_DIRECT	GO:2001223~negative regulation of neuron migration	2	0.271003	0.343552	GPR173, NRG3	681	12	19734	4.82966	1	1	0.994133
GOTERM_BP_DIRECT	GO:0051549~positive regulation of keratinocyte migration	2	0.271003	0.343552	MMP9, HBEGF	681	12	19734	4.82966	1	1	0.994133
GOTERM_BP_DIRECT	GO:0010469~regulation of signaling receptor activity	2	0.271003	0.343552	TAFA1, PCSK9	681	12	19734	4.82966	1	1	0.994133
GOTERM_BP_DIRECT	GO:0042989~sequestering of actin monomers	2	0.271003	0.343552	TMSB4X, TMSB15B	681	12	19734	4.82966	1	1	0.994133
GOTERM_BP_DIRECT	GO:0010508~positive regulation of autophagy	5	0.677507	0.344368	DAPK1, TRIM58, SH3BP4, PRKD1, RNF152	681	86	19734	1.68477	1	1	0.994133
GOTERM_BP_DIRECT	GO:0001503~ossification	5	0.677507	0.344368	SMAD1, CLEC11A, BCL2, ATP6V0A4, LTF	681	86	19734	1.68477	1	1	0.994133
GOTERM_BP_DIRECT	GO:0033209~tumor necrosis factor-mediated signaling pathway	4	0.542005	0.351386	TRAF4, TMSB4X, TNFRSF4, ST18	681	61	19734	1.90019	1	1	0.994133
GOTERM_BP_DIRECT	GO:0014070~response to organic cyclic compound	4	0.542005	0.351386	SFRP1, G6PD, CD83, HBE1	681	61	19734	1.90019	1	1	0.994133
GOTERM_BP_DIRECT	GO:0045666~positive regulation of neuron differentiation	5	0.677507	0.352241	SOCS2, MEF2C, TCF4, GLI2, FGFR1	681	87	19734	1.6654	1	1	0.994133
GOTERM_BP_DIRECT	GO:0019228~neuronal action potential	3	0.406504	0.353522	SCN7A, ANK3, SCN4B	681	36	19734	2.41483	1	1	0.994133
GOTERM_BP_DIRECT	GO:0042113~B cell activation	3	0.406504	0.353522	CD86, HDAC9, ICOSLG	681	36	19734	2.41483	1	1	0.994133
GOTERM_BP_DIRECT	GO:0090050~positive regulation of cell migration involved in sprouting angiogenesis	3	0.406504	0.353522	SRPX2, PTGS2, HDAC9	681	36	19734	2.41483	1	1	0.994133
GOTERM_BP_DIRECT	GO:0061436~establishment of skin barrier	3	0.406504	0.353522	GBA1, ZNF750, HRNR	681	36	19734	2.41483	1	1	0.994133
GOTERM_BP_DIRECT	GO:0001818~negative regulation of cytokine production	3	0.406504	0.366063	SRGN, ATP2B1, HDAC9	681	37	19734	2.34957	1	1	0.994133
GOTERM_BP_DIRECT	GO:0010975~regulation of neuron projection development	3	0.406504	0.366063	SFRP1, SFRP2, IL1RAPL1	681	37	19734	2.34957	1	1	0.994133
GOTERM_BP_DIRECT	GO:0032717~negative regulation of interleukin-8 production	3	0.406504	0.366063	SSC5D, BPI, ELANE	681	37	19734	2.34957	1	1	0.994133
GOTERM_BP_DIRECT	GO:0043407~negative regulation of MAP kinase activity	3	0.406504	0.366063	CAV3, IL1B, GBA1	681	37	19734	2.34957	1	1	0.994133
GOTERM_BP_DIRECT	GO:2001240~negative regulation of extrinsic apoptotic signaling pathway in absence of ligand	3	0.406504	0.366063	IL1B, BCL2, HSPA1A	681	37	19734	2.34957	1	1	0.994133
GOTERM_BP_DIRECT	GO:0010811~positive regulation of cell-substrate adhesion	3	0.406504	0.366063	VIT, COL26A1, PRKCE	681	37	19734	2.34957	1	1	0.994133
GOTERM_BP_DIRECT	GO:0048675~axon extension	3	0.406504	0.366063	SEMA5A, SEMA7A, AUTS2	681	37	19734	2.34957	1	1	0.994133
GOTERM_BP_DIRECT	GO:0032966~negative regulation of collagen biosynthetic process	2	0.271003	0.366185	IL6, CIITA	681	13	19734	4.45815	1	1	0.994133
GOTERM_BP_DIRECT	GO:0061052~negative regulation of cell growth involved in cardiac muscle cell development	2	0.271003	0.366185	G6PD, CAV3	681	13	19734	4.45815	1	1	0.994133
GOTERM_BP_DIRECT	GO:0032926~negative regulation of activin receptor signaling pathway	2	0.271003	0.366185	ACVR1, FKBP1C	681	13	19734	4.45815	1	1	0.994133
GOTERM_BP_DIRECT	GO:0048584~positive regulation of response to stimulus	2	0.271003	0.366185	TRAF4, FLT3	681	13	19734	4.45815	1	1	0.994133
GOTERM_BP_DIRECT	GO:0016554~cytidine to uridine editing	2	0.271003	0.366185	APOBEC3H, APOBEC3B	681	13	19734	4.45815	1	1	0.994133
GOTERM_BP_DIRECT	GO:1903238~positive regulation of leukocyte tethering or rolling	2	0.271003	0.366185	ELANE, FUT4	681	13	19734	4.45815	1	1	0.994133
GOTERM_BP_DIRECT	GO:0051450~myoblast proliferation	2	0.271003	0.366185	SRC, HGF	681	13	19734	4.45815	1	1	0.994133
GOTERM_BP_DIRECT	GO:0010763~positive regulation of fibroblast migration	2	0.271003	0.366185	PRKCE, PTK2	681	13	19734	4.45815	1	1	0.994133
GOTERM_BP_DIRECT	GO:0006002~fructose 6-phosphate metabolic process	2	0.271003	0.366185	HK3, GFPT2	681	13	19734	4.45815	1	1	0.994133
GOTERM_BP_DIRECT	GO:0006885~regulation of pH	2	0.271003	0.366185	SLC9A7, ATP6V0A4	681	13	19734	4.45815	1	1	0.994133
GOTERM_BP_DIRECT	GO:0098976~excitatory chemical synaptic transmission	2	0.271003	0.366185	GRIN2B, GRIN1	681	13	19734	4.45815	1	1	0.994133
GOTERM_BP_DIRECT	GO:0060396~growth hormone receptor signaling pathway	2	0.271003	0.366185	SOCS2, PTK2	681	13	19734	4.45815	1	1	0.994133
GOTERM_BP_DIRECT	GO:0071257~cellular response to electrical stimulus	2	0.271003	0.366185	CIITA, CALR	681	13	19734	4.45815	1	1	0.994133
GOTERM_BP_DIRECT	GO:0050790~regulation of catalytic activity	2	0.271003	0.366185	SH3BP4, PRKAG2	681	13	19734	4.45815	1	1	0.994133
GOTERM_BP_DIRECT	GO:0001952~regulation of cell-matrix adhesion	2	0.271003	0.366185	PKHD1, BCL2	681	13	19734	4.45815	1	1	0.994133
GOTERM_BP_DIRECT	GO:0030183~B cell differentiation	5	0.677507	0.375852	FLT3, BLNK, IFNK, HDAC9, CARD11	681	90	19734	1.60989	1	1	0.994133
GOTERM_BP_DIRECT	GO:0045880~positive regulation of smoothened signaling pathway	3	0.406504	0.378509	SFRP1, FGF9, DCDC2	681	38	19734	2.28773	1	1	0.994133
GOTERM_BP_DIRECT	GO:0007528~neuromuscular junction development	3	0.406504	0.378509	PPFIBP1, MUSK, ANK3	681	38	19734	2.28773	1	1	0.994133
GOTERM_BP_DIRECT	GO:0032757~positive regulation of interleukin-8 production	4	0.542005	0.379739	IL6, IL1B, ELANE, HSPA1A	681	64	19734	1.81112	1	1	0.994133
GOTERM_BP_DIRECT	GO:0051216~cartilage development	4	0.542005	0.379739	SMAD1, SATB2, HOXA3, ITGB8	681	64	19734	1.81112	1	1	0.994133
GOTERM_BP_DIRECT	GO:0000381~regulation of alternative mRNA splicing, via spliceosome	4	0.542005	0.379739	RBFOX1, KHDRBS2, RBPMS, RBM11	681	64	19734	1.81112	1	1	0.994133
GOTERM_BP_DIRECT	GO:0030097~hemopoiesis	4	0.542005	0.379739	KIRREL3, MEIS1, ANGPT1, FLT3	681	64	19734	1.81112	1	1	0.994133
GOTERM_BP_DIRECT	GO:0050896~response to stimulus	5	0.677507	0.383708	PDE6H, TACSTD2, CNGB3, MMP9, CARD11	681	91	19734	1.5922	1	1	0.994133
GOTERM_BP_DIRECT	GO:0071277~cellular response to calcium ion	5	0.677507	0.383708	MEF2C, ALOX5AP, ITPKA, RASAL1, CPNE3	681	91	19734	1.5922	1	1	0.994133
GOTERM_BP_DIRECT	GO:0070374~positive regulation of ERK1 and ERK2 cascade	10	1.35501	0.385968	AKAP12, SEMA7A, ANGPT1, SRC, GPR183, CXCL17, PDGFA, MT1X, FPR2, HLA-DRB1	681	228	19734	1.27096	1	1	0.994133
GOTERM_BP_DIRECT	GO:0030198~extracellular matrix organization	8	1.08401	0.387299	ADAMTS16, VIT, COL17A1, COL24A1, C1QTNF7, MMP28, MMP8, MMP9	681	173	19734	1.34002	1	1	0.994133
GOTERM_BP_DIRECT	GO:0034145~positive regulation of toll-like receptor 4 signaling pathway	2	0.271003	0.38804	ZNRF1, LTF	681	14	19734	4.13971	1	1	0.994133
GOTERM_BP_DIRECT	GO:0050732~negative regulation of peptidyl-tyrosine phosphorylation	2	0.271003	0.38804	SFRP1, SFRP2	681	14	19734	4.13971	1	1	0.994133
GOTERM_BP_DIRECT	GO:0002089~lens morphogenesis in camera-type eye	2	0.271003	0.38804	BCAR3, MEIS1	681	14	19734	4.13971	1	1	0.994133
GOTERM_BP_DIRECT	GO:0002087~regulation of respiratory gaseous exchange by nervous system process	2	0.271003	0.38804	TSHZ3, PBX3	681	14	19734	4.13971	1	1	0.994133
GOTERM_BP_DIRECT	GO:0042592~homeostatic process	2	0.271003	0.38804	PKHD1, SMAD1	681	14	19734	4.13971	1	1	0.994133
GOTERM_BP_DIRECT	GO:0010243~response to organonitrogen compound	2	0.271003	0.38804	FLT3, TNIK	681	14	19734	4.13971	1	1	0.994133
GOTERM_BP_DIRECT	GO:0048771~tissue remodeling	2	0.271003	0.38804	TIE1, THBS4	681	14	19734	4.13971	1	1	0.994133
GOTERM_BP_DIRECT	GO:1900025~negative regulation of substrate adhesion-dependent cell spreading	2	0.271003	0.38804	TACSTD2, EFNA5	681	14	19734	4.13971	1	1	0.994133
GOTERM_BP_DIRECT	GO:0045348~positive regulation of MHC class II biosynthetic process	2	0.271003	0.38804	CIITA, AZU1	681	14	19734	4.13971	1	1	0.994133
GOTERM_BP_DIRECT	GO:0015693~magnesium ion transport	2	0.271003	0.38804	NIPAL4, SLC41A2	681	14	19734	4.13971	1	1	0.994133
GOTERM_BP_DIRECT	GO:0097320~plasma membrane tubulation	2	0.271003	0.38804	EHD2, PACSIN1	681	14	19734	4.13971	1	1	0.994133
GOTERM_BP_DIRECT	GO:1900271~regulation of long-term synaptic potentiation	2	0.271003	0.38804	CYP46A1, SHANK3	681	14	19734	4.13971	1	1	0.994133
GOTERM_BP_DIRECT	GO:0010463~mesenchymal cell proliferation	2	0.271003	0.38804	FGF9, FGFR1	681	14	19734	4.13971	1	1	0.994133
GOTERM_BP_DIRECT	GO:0001570~vasculogenesis	4	0.542005	0.389135	EGFL7, WT1, TIE1, ITGB8	681	65	19734	1.78326	1	1	0.994133
GOTERM_BP_DIRECT	GO:0032731~positive regulation of interleukin-1 beta production	4	0.542005	0.389135	IL6, NLRC4, AZU1, INAVA	681	65	19734	1.78326	1	1	0.994133
GOTERM_BP_DIRECT	GO:0034220~monoatomic ion transmembrane transport	7	0.948509	0.389538	SLC12A1, CHRNA6, CYBB, ATP10A, LRRC8B, ATP2B1, GRIA4	681	146	19734	1.38935	1	1	0.994133
GOTERM_BP_DIRECT	GO:0030073~insulin secretion	3	0.406504	0.390851	SLC30A8, PRKCE, SYTL4	681	39	19734	2.22907	1	1	0.994133
GOTERM_BP_DIRECT	GO:0045595~regulation of cell differentiation	3	0.406504	0.390851	LIF, NANOG, FGFR1	681	39	19734	2.22907	1	1	0.994133
GOTERM_BP_DIRECT	GO:0001541~ovarian follicle development	3	0.406504	0.390851	LHCGR, IMMP2L, BCL2	681	39	19734	2.22907	1	1	0.994133
GOTERM_BP_DIRECT	GO:2001237~negative regulation of extrinsic apoptotic signaling pathway	3	0.406504	0.390851	ACVR1, SRC, SH3RF1	681	39	19734	2.22907	1	1	0.994133
GOTERM_BP_DIRECT	GO:0070828~heterochromatin organization	3	0.406504	0.390851	MECOM, PRDM16, SNAI1	681	39	19734	2.22907	1	1	0.994133
GOTERM_BP_DIRECT	GO:0060021~roof of mouth development	4	0.542005	0.398495	CSRNP1, BNC2, SATB2, SNAI1	681	66	19734	1.75624	1	1	0.994133
GOTERM_BP_DIRECT	GO:0022008~neurogenesis	4	0.542005	0.398495	NTN5, PCSK9, DCHS1, EPHB1	681	66	19734	1.75624	1	1	0.994133
GOTERM_BP_DIRECT	GO:0007010~cytoskeleton organization	7	0.948509	0.401885	ABLIM1, MAST4, ANK3, TNIK, HLA-DRB1, FTCD, PACSIN1	681	148	19734	1.37058	1	1	0.994133
GOTERM_BP_DIRECT	GO:0030833~regulation of actin filament polymerization	3	0.406504	0.403082	DAAM2, FYN, ARPC5	681	40	19734	2.17335	1	1	0.994133
GOTERM_BP_DIRECT	GO:0006935~chemotaxis	6	0.813008	0.404876	ANOS1, RAC2, RNASE3, FPR2, RNASE2, CXCL2	681	121	19734	1.43692	1	1	0.994133
GOTERM_BP_DIRECT	GO:0045893~positive regulation of DNA-templated transcription	27	3.65854	0.405606	CD86, CIITA, CITED4, MLLT3, GLI2, PDLIM1, MSANTD1, MECOM, PRDM16, HIVEP3, ACVR1, MEF2C, RBPMS, EGF, PAX3, SUPT3H, SFRP1, IL6, IL5, WT1, IL1B, SNAI1, TCF4, TRIM15, PLCB1, HLA-DRB1, DPEP3	681	713	19734	1.09734	1	1	0.994133
GOTERM_BP_DIRECT	GO:0051091~positive regulation of DNA-binding transcription factor activity	5	0.677507	0.407197	IL6, ANXA3, IL1B, TRIM15, RNF220	681	94	19734	1.54138	1	1	0.994133
GOTERM_BP_DIRECT	GO:0071361~cellular response to ethanol	2	0.271003	0.409142	PRKCE, CYBB	681	15	19734	3.86373	1	1	0.994133
GOTERM_BP_DIRECT	GO:0050427~3'-phosphoadenosine 5'-phosphosulfate metabolic process	2	0.271003	0.409142	SULT2B1, SULT1B1	681	15	19734	3.86373	1	1	0.994133
GOTERM_BP_DIRECT	GO:0032682~negative regulation of chemokine production	2	0.271003	0.409142	IL6, ELANE	681	15	19734	3.86373	1	1	0.994133
GOTERM_BP_DIRECT	GO:0045806~negative regulation of endocytosis	2	0.271003	0.409142	PRKD1, PACSIN1	681	15	19734	3.86373	1	1	0.994133
GOTERM_BP_DIRECT	GO:0002430~complement receptor mediated signaling pathway	2	0.271003	0.409142	ITGAM, FPR2	681	15	19734	3.86373	1	1	0.994133
GOTERM_BP_DIRECT	GO:0048011~neurotrophin TRK receptor signaling pathway	2	0.271003	0.409142	DOCK3, SRC	681	15	19734	3.86373	1	1	0.994133
GOTERM_BP_DIRECT	GO:0003073~regulation of systemic arterial blood pressure	2	0.271003	0.409142	ADAMTS16, NCALD	681	15	19734	3.86373	1	1	0.994133
GOTERM_BP_DIRECT	GO:0038166~angiotensin-activated signaling pathway	2	0.271003	0.409142	MAS1, SRC	681	15	19734	3.86373	1	1	0.994133
GOTERM_BP_DIRECT	GO:1902230~negative regulation of intrinsic apoptotic signaling pathway in response to DNA damage	2	0.271003	0.409142	SFRP2, SNAI1	681	15	19734	3.86373	1	1	0.994133
GOTERM_BP_DIRECT	GO:1903830~magnesium ion transmembrane transport	2	0.271003	0.409142	NIPAL4, SLC41A2	681	15	19734	3.86373	1	1	0.994133
GOTERM_BP_DIRECT	GO:1903265~positive regulation of tumor necrosis factor-mediated signaling pathway	2	0.271003	0.409142	MMP8, HSPA1A	681	15	19734	3.86373	1	1	0.994133
GOTERM_BP_DIRECT	GO:0061061~muscle structure development	2	0.271003	0.409142	PDLIM1, HOXA2	681	15	19734	3.86373	1	1	0.994133
GOTERM_BP_DIRECT	GO:0034116~positive regulation of heterotypic cell-cell adhesion	2	0.271003	0.409142	CEACAM6, IL1B	681	15	19734	3.86373	1	1	0.994133
GOTERM_BP_DIRECT	GO:0046598~positive regulation of viral entry into host cell	2	0.271003	0.409142	P4HB, HLA-DRB1	681	15	19734	3.86373	1	1	0.994133
GOTERM_BP_DIRECT	GO:0016358~dendrite development	3	0.406504	0.415195	MAP1A, LAMA3, FLRT1	681	41	19734	2.12034	1	1	0.994133
GOTERM_BP_DIRECT	GO:0033627~cell adhesion mediated by integrin	3	0.406504	0.415195	ITGAM, MMRN1, ITGB8	681	41	19734	2.12034	1	1	0.994133
GOTERM_BP_DIRECT	GO:0086091~regulation of heart rate by cardiac conduction	3	0.406504	0.415195	SRC, KCNA5, SCN4B	681	41	19734	2.12034	1	1	0.994133
GOTERM_BP_DIRECT	GO:0001916~positive regulation of T cell mediated cytotoxicity	3	0.406504	0.415195	HLA-DPB1, CD1E, HLA-DRB1	681	41	19734	2.12034	1	1	0.994133
GOTERM_BP_DIRECT	GO:0006821~chloride transport	3	0.406504	0.415195	SLC26A8, TSPO, CLCN1	681	41	19734	2.12034	1	1	0.994133
GOTERM_BP_DIRECT	GO:0032467~positive regulation of cytokinesis	3	0.406504	0.415195	PRKCE, TAS2R13, CDC14B	681	41	19734	2.12034	1	1	0.994133
GOTERM_BP_DIRECT	GO:0060291~long-term synaptic potentiation	4	0.542005	0.417093	TSHZ3, GRIN2B, SHANK3, SNCA	681	68	19734	1.70459	1	1	0.994133
GOTERM_BP_DIRECT	GO:0032715~negative regulation of interleukin-6 production	4	0.542005	0.417093	HGF, GBA1, BPI, CD200	681	68	19734	1.70459	1	1	0.994133
GOTERM_BP_DIRECT	GO:0007368~determination of left/right symmetry	4	0.542005	0.417093	ACVR1, DNAI2, DAAM2, ACVR2A	681	68	19734	1.70459	1	1	0.994133
GOTERM_BP_DIRECT	GO:0007219~Notch signaling pathway	6	0.813008	0.418551	PTP4A3, DNER, SNAI1, KCNA5, TSPEAR, MAML3	681	123	19734	1.41356	1	1	0.994133
GOTERM_BP_DIRECT	GO:0031175~neuron projection development	6	0.813008	0.425369	GPRIN3, IL6, NEGR1, PTPRM, POU4F1, FGFR1	681	124	19734	1.40216	1	1	0.994133
GOTERM_BP_DIRECT	GO:0035725~sodium ion transmembrane transport	6	0.813008	0.425369	SLC12A1, SCN7A, KCNK1, SCN4B, SLC38A4, SLC28A3	681	124	19734	1.40216	1	1	0.994133
GOTERM_BP_DIRECT	GO:0043154~negative regulation of cysteine-type endopeptidase activity involved in apoptotic process	3	0.406504	0.427183	SRC, SH3RF1, SNCA	681	42	19734	2.06986	1	1	0.994133
GOTERM_BP_DIRECT	GO:0043010~camera-type eye development	3	0.406504	0.427183	WT1, MAB21L2, GRHL2	681	42	19734	2.06986	1	1	0.994133
GOTERM_BP_DIRECT	GO:0071526~semaphorin-plexin signaling pathway	3	0.406504	0.427183	SEMA5A, SEMA7A, PLXNA4	681	42	19734	2.06986	1	1	0.994133
GOTERM_BP_DIRECT	GO:0071625~vocalization behavior	2	0.271003	0.429518	SRPX2, SHANK3	681	16	19734	3.62225	1	1	0.994133
GOTERM_BP_DIRECT	GO:0098664~G protein-coupled serotonin receptor signaling pathway	2	0.271003	0.429518	HRH1, HTR7	681	16	19734	3.62225	1	1	0.994133
GOTERM_BP_DIRECT	GO:0090336~positive regulation of brown fat cell differentiation	2	0.271003	0.429518	METRNL, PTGS2	681	16	19734	3.62225	1	1	0.994133
GOTERM_BP_DIRECT	GO:0007216~G protein-coupled glutamate receptor signaling pathway	2	0.271003	0.429518	GRM7, FYN	681	16	19734	3.62225	1	1	0.994133
GOTERM_BP_DIRECT	GO:0002690~positive regulation of leukocyte chemotaxis	2	0.271003	0.429518	F7, IL6	681	16	19734	3.62225	1	1	0.994133
GOTERM_BP_DIRECT	GO:0033630~positive regulation of cell adhesion mediated by integrin	2	0.271003	0.429518	SFRP2, LIF	681	16	19734	3.62225	1	1	0.994133
GOTERM_BP_DIRECT	GO:0050773~regulation of dendrite development	2	0.271003	0.429518	CAMK1D, RAB17	681	16	19734	3.62225	1	1	0.994133
GOTERM_BP_DIRECT	GO:0060347~heart trabecula formation	2	0.271003	0.429518	CAV3, FKBP1C	681	16	19734	3.62225	1	1	0.994133
GOTERM_BP_DIRECT	GO:0012501~programmed cell death	2	0.271003	0.429518	PKM, HTRA4	681	16	19734	3.62225	1	1	0.994133
GOTERM_BP_DIRECT	GO:0030902~hindbrain development	2	0.271003	0.429518	SMAD1, GLI2	681	16	19734	3.62225	1	1	0.994133
GOTERM_BP_DIRECT	GO:0070207~protein homotrimerization	2	0.271003	0.429518	P2RX3, ALOX5AP	681	16	19734	3.62225	1	1	0.994133
GOTERM_BP_DIRECT	GO:0032793~positive regulation of CREB transcription factor activity	2	0.271003	0.429518	CAMK1D, CD200	681	16	19734	3.62225	1	1	0.994133
GOTERM_BP_DIRECT	GO:0032230~positive regulation of synaptic transmission, GABAergic	2	0.271003	0.429518	PRKCE, TACR1	681	16	19734	3.62225	1	1	0.994133
GOTERM_BP_DIRECT	GO:0010273~detoxification of copper ion	2	0.271003	0.429518	MT1F, MT1X	681	16	19734	3.62225	1	1	0.994133
GOTERM_BP_DIRECT	GO:0051770~positive regulation of nitric-oxide synthase biosynthetic process	2	0.271003	0.429518	AKAP12, NAMPT	681	16	19734	3.62225	1	1	0.994133
GOTERM_BP_DIRECT	GO:1904645~response to amyloid-beta	2	0.271003	0.429518	FYN, MMP9	681	16	19734	3.62225	1	1	0.994133
GOTERM_BP_DIRECT	GO:0050796~regulation of insulin secretion	3	0.406504	0.43904	IL6, IL1B, KCNA5	681	43	19734	2.02172	1	1	0.994133
GOTERM_BP_DIRECT	GO:1904706~negative regulation of vascular associated smooth muscle cell proliferation	3	0.406504	0.43904	MEF2C, TAFA5, GNA12	681	43	19734	2.02172	1	1	0.994133
GOTERM_BP_DIRECT	GO:0019221~cytokine-mediated signaling pathway	7	0.948509	0.444899	IL6, EDA, FLT3, IL1B, IFNK, STAT4, CTSG	681	155	19734	1.30868	1	1	0.994133
GOTERM_BP_DIRECT	GO:0007517~muscle organ development	5	0.677507	0.445906	CHODL, MEF2C, CAV3, PAX3, HBEGF	681	99	19734	1.46353	1	1	0.994133
GOTERM_BP_DIRECT	GO:0007409~axonogenesis	5	0.677507	0.445906	MAP1A, TRIM46, BCL2, ANK3, POU4F1	681	99	19734	1.46353	1	1	0.994133
GOTERM_BP_DIRECT	GO:0007507~heart development	9	1.21951	0.447406	PDLIM1, ACVR1, MEF2C, CALCRL, WT1, FGF12, POU4F1, HDAC9, GLI2	681	212	19734	1.2302	1	1	0.994133
GOTERM_BP_DIRECT	GO:0046785~microtubule polymerization	2	0.271003	0.449191	TPPP3, TPPP2	681	17	19734	3.40917	1	1	0.994133
GOTERM_BP_DIRECT	GO:0071901~negative regulation of protein serine/threonine kinase activity	2	0.271003	0.449191	PRKCH, GADD45A	681	17	19734	3.40917	1	1	0.994133
GOTERM_BP_DIRECT	GO:0007413~axonal fasciculation	2	0.271003	0.449191	SEMA5A, TNFRSF21	681	17	19734	3.40917	1	1	0.994133
GOTERM_BP_DIRECT	GO:0045869~negative regulation of single stranded viral RNA replication via double stranded DNA intermediate	2	0.271003	0.449191	APOBEC3H, APOBEC3B	681	17	19734	3.40917	1	1	0.994133
GOTERM_BP_DIRECT	GO:0042325~regulation of phosphorylation	2	0.271003	0.449191	SRPX2, CD24	681	17	19734	3.40917	1	1	0.994133
GOTERM_BP_DIRECT	GO:0043116~negative regulation of vascular permeability	2	0.271003	0.449191	AKAP12, ANGPT1	681	17	19734	3.40917	1	1	0.994133
GOTERM_BP_DIRECT	GO:0006691~leukotriene metabolic process	2	0.271003	0.449191	ABCC1, CYP4F3	681	17	19734	3.40917	1	1	0.994133
GOTERM_BP_DIRECT	GO:0070542~response to fatty acid	2	0.271003	0.449191	SCD, PTGS2	681	17	19734	3.40917	1	1	0.994133
GOTERM_BP_DIRECT	GO:0010526~retrotransposon silencing	2	0.271003	0.449191	APOBEC3H, APOBEC3B	681	17	19734	3.40917	1	1	0.994133
GOTERM_BP_DIRECT	GO:0006855~xenobiotic transmembrane transport	2	0.271003	0.449191	ABCC4, SLC28A3	681	17	19734	3.40917	1	1	0.994133
GOTERM_BP_DIRECT	GO:0034975~protein folding in endoplasmic reticulum	2	0.271003	0.449191	P4HB, CALR	681	17	19734	3.40917	1	1	0.994133
GOTERM_BP_DIRECT	GO:0032434~regulation of proteasomal ubiquitin-dependent protein catabolic process	2	0.271003	0.449191	GNA12, UBQLN3	681	17	19734	3.40917	1	1	0.994133
GOTERM_BP_DIRECT	GO:0010614~negative regulation of cardiac muscle hypertrophy	2	0.271003	0.449191	CAV3, JARID2	681	17	19734	3.40917	1	1	0.994133
GOTERM_BP_DIRECT	GO:0030322~stabilization of membrane potential	2	0.271003	0.449191	KCNK12, KCNK1	681	17	19734	3.40917	1	1	0.994133
GOTERM_BP_DIRECT	GO:0002221~pattern recognition receptor signaling pathway	2	0.271003	0.449191	NLRC4, INAVA	681	17	19734	3.40917	1	1	0.994133
GOTERM_BP_DIRECT	GO:0051290~protein heterotetramerization	2	0.271003	0.449191	GRIN2B, GRIN1	681	17	19734	3.40917	1	1	0.994133
GOTERM_BP_DIRECT	GO:0042448~progesterone metabolic process	2	0.271003	0.449191	AKR1C4, CYP46A1	681	17	19734	3.40917	1	1	0.994133
GOTERM_BP_DIRECT	GO:0001702~gastrulation with mouth forming second	2	0.271003	0.449191	ACVR1, ACVR2A	681	17	19734	3.40917	1	1	0.994133
GOTERM_BP_DIRECT	GO:0007212~G protein-coupled dopamine receptor signaling pathway	2	0.271003	0.449191	GNB5, ADCY6	681	17	19734	3.40917	1	1	0.994133
GOTERM_BP_DIRECT	GO:0048870~cell motility	3	0.406504	0.450762	SRPX2, PHACTR1, PTK2	681	44	19734	1.97577	1	1	0.994133
GOTERM_BP_DIRECT	GO:0090090~negative regulation of canonical Wnt signaling pathway	7	0.948509	0.451	TMEM88B, SFRP1, SFRP2, SOSTDC1, MLLT3, TMEM196, NKD2	681	156	19734	1.30029	1	1	0.994133
GOTERM_BP_DIRECT	GO:0051865~protein autoubiquitination	4	0.542005	0.453684	SH3RF3, TRIM58, SH3RF1, RNF220	681	72	19734	1.60989	1	1	0.994133
GOTERM_BP_DIRECT	GO:0043408~regulation of MAPK cascade	3	0.406504	0.462343	FYN, TNIK, CD24	681	45	19734	1.93186	1	1	0.994133
GOTERM_BP_DIRECT	GO:0001755~neural crest cell migration	3	0.406504	0.462343	ACVR1, SEMA5A, SEMA7A	681	45	19734	1.93186	1	1	0.994133
GOTERM_BP_DIRECT	GO:0031667~response to nutrient levels	3	0.406504	0.462343	SCT, SRC, DPEP3	681	45	19734	1.93186	1	1	0.994133
GOTERM_BP_DIRECT	GO:1904646~cellular response to amyloid-beta	3	0.406504	0.462343	ABCC1, FYN, FPR2	681	45	19734	1.93186	1	1	0.994133
GOTERM_BP_DIRECT	GO:0009791~post-embryonic development	4	0.542005	0.462685	CSRNP1, CHST11, BCL2, ITPR1	681	73	19734	1.58783	1	1	0.994133
GOTERM_BP_DIRECT	GO:0055085~transmembrane transport	10	1.35501	0.463018	SLC22A12, SLC10A4, ABCC4, OCA2, GJB2, ABCC1, SV2B, CLDN2, SLC4A3, SLC22A31	681	246	19734	1.17797	1	1	0.994133
GOTERM_BP_DIRECT	GO:1904355~positive regulation of telomere capping	2	0.271003	0.468188	PKIB, PRKCQ	681	18	19734	3.21977	1	1	0.994133
GOTERM_BP_DIRECT	GO:0060065~uterus development	2	0.271003	0.468188	LHCGR, SRC	681	18	19734	3.21977	1	1	0.994133
GOTERM_BP_DIRECT	GO:0045926~negative regulation of growth	2	0.271003	0.468188	MT1F, MT1X	681	18	19734	3.21977	1	1	0.994133
GOTERM_BP_DIRECT	GO:0035234~ectopic germ cell programmed cell death	2	0.271003	0.468188	IL1B, MAEL	681	18	19734	3.21977	1	1	0.994133
GOTERM_BP_DIRECT	GO:0008209~androgen metabolic process	2	0.271003	0.468188	HSD17B2, AKR1C4	681	18	19734	3.21977	1	1	0.994133
GOTERM_BP_DIRECT	GO:0002063~chondrocyte development	2	0.271003	0.468188	SFRP2, CHST11	681	18	19734	3.21977	1	1	0.994133
GOTERM_BP_DIRECT	GO:0032930~positive regulation of superoxide anion generation	2	0.271003	0.468188	ITGAM, FPR2	681	18	19734	3.21977	1	1	0.994133
GOTERM_BP_DIRECT	GO:0043388~positive regulation of DNA binding	2	0.271003	0.468188	EGF, MMP9	681	18	19734	3.21977	1	1	0.994133
GOTERM_BP_DIRECT	GO:0051145~smooth muscle cell differentiation	2	0.271003	0.468188	ACVR1, MEF2C	681	18	19734	3.21977	1	1	0.994133
GOTERM_BP_DIRECT	GO:0060997~dendritic spine morphogenesis	2	0.271003	0.468188	SHANK3, EPHB1	681	18	19734	3.21977	1	1	0.994133
GOTERM_BP_DIRECT	GO:0030277~maintenance of gastrointestinal epithelium	2	0.271003	0.468188	TFF3, MUC4	681	18	19734	3.21977	1	1	0.994133
GOTERM_BP_DIRECT	GO:0097435~supramolecular fiber organization	2	0.271003	0.468188	FKBP1C, SNCA	681	18	19734	3.21977	1	1	0.994133
GOTERM_BP_DIRECT	GO:0030889~negative regulation of B cell proliferation	2	0.271003	0.468188	MNDA, TNFRSF21	681	18	19734	3.21977	1	1	0.994133
GOTERM_BP_DIRECT	GO:0061178~regulation of insulin secretion involved in cellular response to glucose stimulus	2	0.271003	0.468188	PRKCE, EFNA5	681	18	19734	3.21977	1	1	0.994133
GOTERM_BP_DIRECT	GO:0048143~astrocyte activation	2	0.271003	0.468188	IL1B, FPR2	681	18	19734	3.21977	1	1	0.994133
GOTERM_BP_DIRECT	GO:0045779~negative regulation of bone resorption	2	0.271003	0.468188	IL6, UBASH3B	681	18	19734	3.21977	1	1	0.994133
GOTERM_BP_DIRECT	GO:0019725~cellular homeostasis	2	0.271003	0.468188	SLC22A12, SCN7A	681	18	19734	3.21977	1	1	0.994133
GOTERM_BP_DIRECT	GO:0048872~homeostasis of number of cells	2	0.271003	0.468188	GBA1, CARD11	681	18	19734	3.21977	1	1	0.994133
GOTERM_BP_DIRECT	GO:0033198~response to ATP	2	0.271003	0.468188	IL1B, DNTT	681	18	19734	3.21977	1	1	0.994133
GOTERM_BP_DIRECT	GO:0032526~response to retinoic acid	3	0.406504	0.47378	GJB2, TIE1, HSD17B2	681	46	19734	1.88987	1	1	0.994133
GOTERM_BP_DIRECT	GO:0045494~photoreceptor cell maintenance	3	0.406504	0.47378	PROM1, NXNL1, NXNL2	681	46	19734	1.88987	1	1	0.994133
GOTERM_BP_DIRECT	GO:0030148~sphingolipid biosynthetic process	3	0.406504	0.47378	ABCC1, ELOVL3, PRKD1	681	46	19734	1.88987	1	1	0.994133
GOTERM_BP_DIRECT	GO:0048863~stem cell differentiation	3	0.406504	0.47378	LIF, JARID2, FGFR1	681	46	19734	1.88987	1	1	0.994133
GOTERM_BP_DIRECT	GO:0071346~cellular response to type II interferon	5	0.677507	0.4763	CIITA, RAB20, DAPK1, FLNB, HLA-DPA1	681	103	19734	1.4067	1	1	0.994133
GOTERM_BP_DIRECT	GO:0007338~single fertilization	4	0.542005	0.480488	ACR, NPM2, ITPR1, ADAM20	681	75	19734	1.54549	1	1	0.994133
GOTERM_BP_DIRECT	GO:0000902~cell morphogenesis	5	0.677507	0.483801	HGF, MAEL, LIF, ITPR1, CDH24	681	104	19734	1.39317	1	1	0.994133
GOTERM_BP_DIRECT	GO:0048286~lung alveolus development	3	0.406504	0.485068	LIF, PDGFA, HOXA5	681	47	19734	1.84966	1	1	0.994133
GOTERM_BP_DIRECT	GO:0002548~monocyte chemotaxis	3	0.406504	0.485068	IL6, S100A12, CTSG	681	47	19734	1.84966	1	1	0.994133
GOTERM_BP_DIRECT	GO:0050995~negative regulation of lipid catabolic process	2	0.271003	0.48653	ALK, IL1B	681	19	19734	3.05031	1	1	0.994133
GOTERM_BP_DIRECT	GO:0061001~regulation of dendritic spine morphogenesis	2	0.271003	0.48653	SIPA1L1, SHANK3	681	19	19734	3.05031	1	1	0.994133
GOTERM_BP_DIRECT	GO:0051923~sulfation	2	0.271003	0.48653	SULT2B1, SULT1B1	681	19	19734	3.05031	1	1	0.994133
GOTERM_BP_DIRECT	GO:0030949~positive regulation of vascular endothelial growth factor receptor signaling pathway	2	0.271003	0.48653	FGF9, IL1B	681	19	19734	3.05031	1	1	0.994133
GOTERM_BP_DIRECT	GO:0032469~endoplasmic reticulum calcium ion homeostasis	2	0.271003	0.48653	BCL2, ITPR1	681	19	19734	3.05031	1	1	0.994133
GOTERM_BP_DIRECT	GO:1904036~negative regulation of epithelial cell apoptotic process	2	0.271003	0.48653	PKHD1, BCL2	681	19	19734	3.05031	1	1	0.994133
GOTERM_BP_DIRECT	GO:0001558~regulation of cell growth	4	0.542005	0.489285	SOCS2, NRG3, WFDC1, PRKCQ	681	76	19734	1.52516	1	1	0.994133
GOTERM_BP_DIRECT	GO:0042130~negative regulation of T cell proliferation	3	0.406504	0.496205	CD86, HLA-DRB1, TNFRSF21	681	48	19734	1.81112	1	1	0.994133
GOTERM_BP_DIRECT	GO:0010719~negative regulation of epithelial to mesenchymal transition	3	0.406504	0.496205	SFRP1, SFRP2, ZNF750	681	48	19734	1.81112	1	1	0.994133
GOTERM_BP_DIRECT	GO:0048538~thymus development	3	0.406504	0.496205	HOXA3, BCL2, JARID2	681	48	19734	1.81112	1	1	0.994133
GOTERM_BP_DIRECT	GO:0009267~cellular response to starvation	4	0.542005	0.498009	SFRP1, PCSK9, GBA1, PIK3C2B	681	77	19734	1.50535	1	1	0.994133
GOTERM_BP_DIRECT	GO:0016525~negative regulation of angiogenesis	6	0.813008	0.498989	GADD45A, TIE1, PTPRM, ISM1, HOXA5, THBS4	681	135	19734	1.28791	1	1	0.994133
GOTERM_BP_DIRECT	GO:0030182~neuron differentiation	7	0.948509	0.499166	MEF2C, RTN1, IL1RAPL1, ANOS1, PCSK9, WNT9A, HDAC9	681	164	19734	1.23686	1	1	0.994133
GOTERM_BP_DIRECT	GO:0003091~renal water homeostasis	2	0.271003	0.50424	CYP4F3, ADCY6	681	20	19734	2.8978	1	1	0.994133
GOTERM_BP_DIRECT	GO:0061621~canonical glycolysis	2	0.271003	0.50424	HK3, PKM	681	20	19734	2.8978	1	1	0.994133
GOTERM_BP_DIRECT	GO:0002476~antigen processing and presentation of endogenous peptide antigen via MHC class Ib	2	0.271003	0.50424	HLA-DPB1, HLA-DRB1	681	20	19734	2.8978	1	1	0.994133
GOTERM_BP_DIRECT	GO:0002486~antigen processing and presentation of endogenous peptide antigen via MHC class I via ER pathway, TAP-independent	2	0.271003	0.50424	HLA-DPB1, HLA-DRB1	681	20	19734	2.8978	1	1	0.994133
GOTERM_BP_DIRECT	GO:0034587~piRNA processing	2	0.271003	0.50424	MAEL, TDRD5	681	20	19734	2.8978	1	1	0.994133
GOTERM_BP_DIRECT	GO:0010759~positive regulation of macrophage chemotaxis	2	0.271003	0.50424	CXCL17, PTK2	681	20	19734	2.8978	1	1	0.994133
GOTERM_BP_DIRECT	GO:0006820~monoatomic anion transport	2	0.271003	0.50424	TSPO, SLC4A3	681	20	19734	2.8978	1	1	0.994133
GOTERM_BP_DIRECT	GO:0050770~regulation of axonogenesis	2	0.271003	0.50424	SIPA1L1, UST	681	20	19734	2.8978	1	1	0.994133
GOTERM_BP_DIRECT	GO:0006801~superoxide metabolic process	2	0.271003	0.50424	IMMP2L, CYBB	681	20	19734	2.8978	1	1	0.994133
GOTERM_BP_DIRECT	GO:2001222~regulation of neuron migration	2	0.271003	0.50424	PHACTR1, SCRT1	681	20	19734	2.8978	1	1	0.994133
GOTERM_BP_DIRECT	GO:0034260~negative regulation of GTPase activity	2	0.271003	0.50424	GPSM1, SH3BP4	681	20	19734	2.8978	1	1	0.994133
GOTERM_BP_DIRECT	GO:0030539~male genitalia development	2	0.271003	0.50424	LHCGR, WT1	681	20	19734	2.8978	1	1	0.994133
GOTERM_BP_DIRECT	GO:0006633~fatty acid biosynthetic process	3	0.406504	0.507187	OLAH, ACSM6, PRKAG2	681	49	19734	1.77416	1	1	0.994133
GOTERM_BP_DIRECT	GO:0050673~epithelial cell proliferation	3	0.406504	0.518011	EGF, HGF, GLI2	681	50	19734	1.73868	1	1	0.994133
GOTERM_BP_DIRECT	GO:0030900~forebrain development	3	0.406504	0.518011	ITGAM, SRC, FYN	681	50	19734	1.73868	1	1	0.994133
GOTERM_BP_DIRECT	GO:0007188~adenylate cyclase-modulating G protein-coupled receptor signaling pathway	3	0.406504	0.518011	GNA12, ADRA1D, GNAI1	681	50	19734	1.73868	1	1	0.994133
GOTERM_BP_DIRECT	GO:0008542~visual learning	3	0.406504	0.518011	TANC1, HRH1, GRIN1	681	50	19734	1.73868	1	1	0.994133
GOTERM_BP_DIRECT	GO:0007276~gamete generation	2	0.271003	0.52134	SMAD1, NR6A1	681	21	19734	2.75981	1	1	0.994133
GOTERM_BP_DIRECT	GO:0050868~negative regulation of T cell activation	2	0.271003	0.52134	CTSG, PDCD1	681	21	19734	2.75981	1	1	0.994133
GOTERM_BP_DIRECT	GO:0042474~middle ear morphogenesis	2	0.271003	0.52134	HOXA2, FGFR1	681	21	19734	2.75981	1	1	0.994133
GOTERM_BP_DIRECT	GO:0045717~negative regulation of fatty acid biosynthetic process	2	0.271003	0.52134	KLHL25, TRIB3	681	21	19734	2.75981	1	1	0.994133
GOTERM_BP_DIRECT	GO:0046677~response to antibiotic	2	0.271003	0.52134	CIITA, AOC1	681	21	19734	2.75981	1	1	0.994133
GOTERM_BP_DIRECT	GO:0046628~positive regulation of insulin receptor signaling pathway	2	0.271003	0.52134	SRC, SORBS1	681	21	19734	2.75981	1	1	0.994133
GOTERM_BP_DIRECT	GO:0033141~positive regulation of peptidyl-serine phosphorylation of STAT protein	2	0.271003	0.52134	IFNK, LIF	681	21	19734	2.75981	1	1	0.994133
GOTERM_BP_DIRECT	GO:0019373~epoxygenase P450 pathway	2	0.271003	0.52134	CYP2S1, CYP4F3	681	21	19734	2.75981	1	1	0.994133
GOTERM_BP_DIRECT	GO:0060037~pharyngeal system development	2	0.271003	0.52134	ACVR1, HOXA2	681	21	19734	2.75981	1	1	0.994133
GOTERM_BP_DIRECT	GO:0031643~positive regulation of myelination	2	0.271003	0.52134	MAG, CST7	681	21	19734	2.75981	1	1	0.994133
GOTERM_BP_DIRECT	GO:0046827~positive regulation of protein export from nucleus	2	0.271003	0.52134	IL1B, PRKD1	681	21	19734	2.75981	1	1	0.994133
GOTERM_BP_DIRECT	GO:0007018~microtubule-based movement	4	0.542005	0.523716	DNAH12, KIF26B, STARD9, KIFC3	681	80	19734	1.4489	1	1	0.994133
GOTERM_BP_DIRECT	GO:0043069~negative regulation of programmed cell death	2	0.271003	0.537852	MECOM, POU4F1	681	22	19734	2.63436	1	1	0.994133
GOTERM_BP_DIRECT	GO:0015804~neutral amino acid transport	2	0.271003	0.537852	SLC7A10, SLC38A4	681	22	19734	2.63436	1	1	0.994133
GOTERM_BP_DIRECT	GO:0006693~prostaglandin metabolic process	2	0.271003	0.537852	CYP2S1, AKR1C4	681	22	19734	2.63436	1	1	0.994133
GOTERM_BP_DIRECT	GO:0016079~synaptic vesicle exocytosis	2	0.271003	0.537852	CPLX2, SNCA	681	22	19734	2.63436	1	1	0.994133
GOTERM_BP_DIRECT	GO:0061351~neural precursor cell proliferation	2	0.271003	0.537852	SHANK3, EPHB1	681	22	19734	2.63436	1	1	0.994133
GOTERM_BP_DIRECT	GO:0036092~phosphatidylinositol-3-phosphate biosynthetic process	2	0.271003	0.537852	INPP4B, PIK3C2B	681	22	19734	2.63436	1	1	0.994133
GOTERM_BP_DIRECT	GO:0061003~positive regulation of dendritic spine morphogenesis	2	0.271003	0.537852	IL1RAPL1, ITPKA	681	22	19734	2.63436	1	1	0.994133
GOTERM_BP_DIRECT	GO:0007009~plasma membrane organization	2	0.271003	0.537852	CAV3, ANK3	681	22	19734	2.63436	1	1	0.994133
GOTERM_BP_DIRECT	GO:0045921~positive regulation of exocytosis	2	0.271003	0.537852	SYTL4, SNCA	681	22	19734	2.63436	1	1	0.994133
GOTERM_BP_DIRECT	GO:0022904~respiratory electron transport chain	2	0.271003	0.537852	IMMP2L, GBA1	681	22	19734	2.63436	1	1	0.994133
GOTERM_BP_DIRECT	GO:0046854~phosphatidylinositol phosphate biosynthetic process	3	0.406504	0.539179	SOCS2, ITPKA, EFR3B	681	52	19734	1.67181	1	1	0.994133
GOTERM_BP_DIRECT	GO:0008544~epidermis development	4	0.542005	0.540446	COL17A1, LAMA3, HLA-DRB1, ZNF750	681	82	19734	1.41356	1	1	0.994133
GOTERM_BP_DIRECT	GO:0032760~positive regulation of tumor necrosis factor production	5	0.677507	0.542106	AKAP12, IL6, CYBB, AZU1, MMP8	681	112	19734	1.29366	1	1	0.994133
GOTERM_BP_DIRECT	GO:0071456~cellular response to hypoxia	6	0.813008	0.543923	SFRP1, SRC, PRKCE, BCL2, P4HB, PTGS2	681	142	19734	1.22442	1	1	0.994133
GOTERM_BP_DIRECT	GO:1900087~positive regulation of G1/S transition of mitotic cell cycle	3	0.406504	0.54952	UBE2E2, KCNA5, PLCB1	681	53	19734	1.64026	1	1	0.994133
GOTERM_BP_DIRECT	GO:0008344~adult locomotory behavior	3	0.406504	0.54952	PBX3, FGF12, SNCA	681	53	19734	1.64026	1	1	0.994133
GOTERM_BP_DIRECT	GO:0035331~negative regulation of hippo signaling	2	0.271003	0.553794	SRC, CARD11	681	23	19734	2.51982	1	1	0.994133
GOTERM_BP_DIRECT	GO:0010613~positive regulation of cardiac muscle hypertrophy	2	0.271003	0.553794	NR4A3, PDE9A	681	23	19734	2.51982	1	1	0.994133
GOTERM_BP_DIRECT	GO:0002223~stimulatory C-type lectin receptor signaling pathway	2	0.271003	0.553794	SRC, FYN	681	23	19734	2.51982	1	1	0.994133
GOTERM_BP_DIRECT	GO:0030220~platelet formation	2	0.271003	0.553794	MEF2C, MFAP2	681	23	19734	2.51982	1	1	0.994133
GOTERM_BP_DIRECT	GO:0019934~cGMP-mediated signaling	2	0.271003	0.553794	GUCY1A1, GUCY1B1	681	23	19734	2.51982	1	1	0.994133
GOTERM_BP_DIRECT	GO:0048168~regulation of neuronal synaptic plasticity	2	0.271003	0.553794	GRIN2B, GRIN1	681	23	19734	2.51982	1	1	0.994133
GOTERM_BP_DIRECT	GO:0032331~negative regulation of chondrocyte differentiation	2	0.271003	0.553794	WNT9A, GLI2	681	23	19734	2.51982	1	1	0.994133
GOTERM_BP_DIRECT	GO:0060307~regulation of ventricular cardiac muscle cell membrane repolarization	2	0.271003	0.553794	CAV3, SCN4B	681	23	19734	2.51982	1	1	0.994133
GOTERM_BP_DIRECT	GO:0009311~oligosaccharide metabolic process	2	0.271003	0.553794	ST8SIA6, FUT4	681	23	19734	2.51982	1	1	0.994133
GOTERM_BP_DIRECT	GO:0050905~neuromuscular process	2	0.271003	0.553794	GBA1, FGF12	681	23	19734	2.51982	1	1	0.994133
GOTERM_BP_DIRECT	GO:0030517~negative regulation of axon extension	2	0.271003	0.553794	MAG, TRIM46	681	23	19734	2.51982	1	1	0.994133
GOTERM_BP_DIRECT	GO:0007041~lysosomal transport	2	0.271003	0.553794	PCSK9, HSPA1A	681	23	19734	2.51982	1	1	0.994133
GOTERM_BP_DIRECT	GO:0007283~spermatogenesis	18	2.43902	0.554333	ROPN1B, LHCGR, KCTD19, SRC, AZIN2, TDRD5, ACVR2A, TAF7L, MAS1, IMMP2L, ADAM28, BOLL, TPPP2, SLC26A8, MAEL, CALR, MORC1, TCP11	681	499	19734	1.0453	1	1	0.994133
GOTERM_BP_DIRECT	GO:0010468~regulation of gene expression	9	1.21951	0.5544	BCL2, NANOG, IGF2BP3, IGF2BP2, ALPK2, JARID2, AFF3, ST18, AFF2	681	233	19734	1.11932	1	1	0.994133
GOTERM_BP_DIRECT	GO:0045444~fat cell differentiation	4	0.542005	0.556834	NR4A1, NR4A3, PLCB1, METRNL	681	84	19734	1.3799	1	1	0.994133
GOTERM_BP_DIRECT	GO:0001889~liver development	4	0.542005	0.556834	HGF, PCSK9, COBL, JARID2	681	84	19734	1.3799	1	1	0.994133
GOTERM_BP_DIRECT	GO:0006968~cellular defense response	3	0.406504	0.559696	CLEC5A, DCDC2, MNDA	681	54	19734	1.60989	1	1	0.994133
GOTERM_BP_DIRECT	GO:0007626~locomotory behavior	4	0.542005	0.564895	RASD2, MEIS1, NEGR1, GPR52	681	85	19734	1.36367	1	1	0.994133
GOTERM_BP_DIRECT	GO:0030325~adrenal gland development	2	0.271003	0.569188	WT1, TSPO	681	24	19734	2.41483	1	1	0.994133
GOTERM_BP_DIRECT	GO:0007340~acrosome reaction	2	0.271003	0.569188	ACR, ROPN1B	681	24	19734	2.41483	1	1	0.994133
GOTERM_BP_DIRECT	GO:0030099~myeloid cell differentiation	2	0.271003	0.569188	CEBPE, CLEC5A	681	24	19734	2.41483	1	1	0.994133
GOTERM_BP_DIRECT	GO:2000378~negative regulation of reactive oxygen species metabolic process	2	0.271003	0.569188	G6PD, BCL2	681	24	19734	2.41483	1	1	0.994133
GOTERM_BP_DIRECT	GO:0051893~regulation of focal adhesion assembly	2	0.271003	0.569188	EFNA5, PTK2	681	24	19734	2.41483	1	1	0.994133
GOTERM_BP_DIRECT	GO:0035019~somatic stem cell population maintenance	3	0.406504	0.569707	SFRP1, LIF, NANOG	681	55	19734	1.58062	1	1	0.994133
GOTERM_BP_DIRECT	GO:0009653~anatomical structure morphogenesis	6	0.813008	0.57482	SMAD1, CLTCL1, IGF2BP3, IGF2BP2, HOXA4, FREM3	681	147	19734	1.18277	1	1	0.994133
GOTERM_BP_DIRECT	GO:0006470~protein dephosphorylation	5	0.677507	0.576779	DUSP5, LRRC18, PTPRM, PPM1J, CDC14B	681	117	19734	1.23837	1	1	0.994133
GOTERM_BP_DIRECT	GO:0045600~positive regulation of fat cell differentiation	3	0.406504	0.579552	SFRP1, KLF5, SFRP2	681	56	19734	1.55239	1	1	0.994133
GOTERM_BP_DIRECT	GO:0016485~protein processing	4	0.542005	0.580745	SRGN, F7, CTSG, AEBP1	681	87	19734	1.33232	1	1	0.994133
GOTERM_BP_DIRECT	GO:0008203~cholesterol metabolic process	4	0.542005	0.580745	SULT2B1, CUBN, PCSK9, GBA1	681	87	19734	1.33232	1	1	0.994133
GOTERM_BP_DIRECT	GO:0042573~retinoic acid metabolic process	2	0.271003	0.584051	ADH1C, CYP2S1	681	25	19734	2.31824	1	1	0.994133
GOTERM_BP_DIRECT	GO:0006688~glycosphingolipid biosynthetic process	2	0.271003	0.584051	FUT2, FUT4	681	25	19734	2.31824	1	1	0.994133
GOTERM_BP_DIRECT	GO:0055013~cardiac muscle cell development	2	0.271003	0.584051	CAV3, ALPK2	681	25	19734	2.31824	1	1	0.994133
GOTERM_BP_DIRECT	GO:0048589~developmental growth	2	0.271003	0.584051	CHST11, GLI2	681	25	19734	2.31824	1	1	0.994133
GOTERM_BP_DIRECT	GO:0032094~response to food	2	0.271003	0.584051	G6PD, MPO	681	25	19734	2.31824	1	1	0.994133
GOTERM_BP_DIRECT	GO:0051262~protein tetramerization	2	0.271003	0.584051	HLA-DRB1, SNCA	681	25	19734	2.31824	1	1	0.994133
GOTERM_BP_DIRECT	GO:0048854~brain morphogenesis	2	0.271003	0.584051	GBA1, SHANK3	681	25	19734	2.31824	1	1	0.994133
GOTERM_BP_DIRECT	GO:0008361~regulation of cell size	2	0.271003	0.584051	VAV3, VAV2	681	25	19734	2.31824	1	1	0.994133
GOTERM_BP_DIRECT	GO:0006869~lipid transport	4	0.542005	0.588532	OSBPL3, TSPO, ESYT3, PLTP	681	88	19734	1.31718	1	1	0.994133
GOTERM_BP_DIRECT	GO:0000226~microtubule cytoskeleton organization	6	0.813008	0.592821	TTLL6, MAP1A, TUBA4B, TTLL9, TUBA4A, CDC14B	681	150	19734	1.15912	1	1	0.994133
GOTERM_BP_DIRECT	GO:0007265~Ras protein signal transduction	4	0.542005	0.596225	RASGEF1B, DOK6, RRAS2, RASGRP3	681	89	19734	1.30238	1	1	0.994133
GOTERM_BP_DIRECT	GO:0002250~adaptive immune response	16	2.16802	0.596436	CD86, HLA-DRB5, CD1E, JCHAIN, HLA-DMA, GPR183, IFNK, HLA-DPB1, FYN, PDCD1, HLA-DOA, TNFRSF21, ICOSLG, HLA-DQA1, HLA-DRB1, HLA-DPA1	681	452	19734	1.02577	1	1	0.994133
GOTERM_BP_DIRECT	GO:0060271~cilium assembly	9	1.21951	0.597484	PKHD1, ABCC4, EHD2, DNAI2, ABLIM1, CEP70, DCDC2, RAB17, CDC14B	681	242	19734	1.07769	1	1	0.994133
GOTERM_BP_DIRECT	GO:0070593~dendrite self-avoidance	2	0.271003	0.598402	PRTG, EMB	681	26	19734	2.22907	1	1	0.994133
GOTERM_BP_DIRECT	GO:0006509~membrane protein ectodomain proteolysis	2	0.271003	0.598402	PRKCQ, PRTN3	681	26	19734	2.22907	1	1	0.994133
GOTERM_BP_DIRECT	GO:0046847~filopodium assembly	2	0.271003	0.598402	DNM3, RAB17	681	26	19734	2.22907	1	1	0.994133
GOTERM_BP_DIRECT	GO:0001782~B cell homeostasis	2	0.271003	0.598402	MEF2C, BCL2	681	26	19734	2.22907	1	1	0.994133
GOTERM_BP_DIRECT	GO:0009312~oligosaccharide biosynthetic process	2	0.271003	0.598402	FUT2, FUT4	681	26	19734	2.22907	1	1	0.994133
GOTERM_BP_DIRECT	GO:0051928~positive regulation of calcium ion transport	2	0.271003	0.598402	TSPO, ATP2B1	681	26	19734	2.22907	1	1	0.994133
GOTERM_BP_DIRECT	GO:0060395~SMAD protein signal transduction	2	0.271003	0.598402	SMAD1, RBPMS	681	26	19734	2.22907	1	1	0.994133
GOTERM_BP_DIRECT	GO:0006884~cell volume homeostasis	2	0.271003	0.598402	SLC12A1, SLC12A7	681	26	19734	2.22907	1	1	0.994133
GOTERM_BP_DIRECT	GO:0045599~negative regulation of fat cell differentiation	3	0.406504	0.598743	IL6, TRIB3, LRP3	681	58	19734	1.49886	1	1	0.994133
GOTERM_BP_DIRECT	GO:1902017~regulation of cilium assembly	2	0.271003	0.612259	ADAMTS16, DCDC2	681	27	19734	2.14652	1	1	0.994133
GOTERM_BP_DIRECT	GO:0006826~iron ion transport	2	0.271003	0.612259	SLC41A2, LTF	681	27	19734	2.14652	1	1	0.994133
GOTERM_BP_DIRECT	GO:0032753~positive regulation of interleukin-4 production	2	0.271003	0.612259	CD86, PRKCQ	681	27	19734	2.14652	1	1	0.994133
GOTERM_BP_DIRECT	GO:0048565~digestive tract development	2	0.271003	0.612259	COBL, DCHS1	681	27	19734	2.14652	1	1	0.994133
GOTERM_BP_DIRECT	GO:0007274~neuromuscular synaptic transmission	2	0.271003	0.612259	P2RX3, FYN	681	27	19734	2.14652	1	1	0.994133
GOTERM_BP_DIRECT	GO:0007190~activation of adenylate cyclase activity	2	0.271003	0.612259	ACR, LHCGR	681	27	19734	2.14652	1	1	0.994133
GOTERM_BP_DIRECT	GO:1904754~positive regulation of vascular associated smooth muscle cell migration	2	0.271003	0.612259	NR4A3, FGF9	681	27	19734	2.14652	1	1	0.994133
GOTERM_BP_DIRECT	GO:0035307~positive regulation of protein dephosphorylation	2	0.271003	0.612259	PPP1R16B, GBA1	681	27	19734	2.14652	1	1	0.994133
GOTERM_BP_DIRECT	GO:0006979~response to oxidative stress	5	0.677507	0.616345	PDLIM1, RBPMS, LPO, PTGS2, MPO	681	123	19734	1.17797	1	1	0.994133
GOTERM_BP_DIRECT	GO:1902895~positive regulation of miRNA transcription	3	0.406504	0.617268	SMAD1, KLF5, WT1	681	60	19734	1.4489	1	1	0.994133
GOTERM_BP_DIRECT	GO:0034605~cellular response to heat	3	0.406504	0.617268	ARPP21, PTGS2, HSPA1A	681	60	19734	1.4489	1	1	0.994133
GOTERM_BP_DIRECT	GO:0003333~amino acid transmembrane transport	2	0.271003	0.625638	SLC7A10, SLC38A4	681	28	19734	2.06986	1	1	0.994133
GOTERM_BP_DIRECT	GO:0072583~clathrin-dependent endocytosis	2	0.271003	0.625638	DNAJC6, STON2	681	28	19734	2.06986	1	1	0.994133
GOTERM_BP_DIRECT	GO:0071897~DNA biosynthetic process	2	0.271003	0.625638	SRC, DNTT	681	28	19734	2.06986	1	1	0.994133
GOTERM_BP_DIRECT	GO:0097746~blood vessel diameter maintenance	2	0.271003	0.625638	P2RY2, ADCY6	681	28	19734	2.06986	1	1	0.994133
GOTERM_BP_DIRECT	GO:0048843~negative regulation of axon extension involved in axon guidance	2	0.271003	0.625638	SEMA5A, SEMA7A	681	28	19734	2.06986	1	1	0.994133
GOTERM_BP_DIRECT	GO:0071549~cellular response to dexamethasone stimulus	2	0.271003	0.625638	GJB2, SMYD3	681	28	19734	2.06986	1	1	0.994133
GOTERM_BP_DIRECT	GO:0030901~midbrain development	2	0.271003	0.625638	SMAD1, FGFR1	681	28	19734	2.06986	1	1	0.994133
GOTERM_BP_DIRECT	GO:0035567~non-canonical Wnt signaling pathway	2	0.271003	0.625638	SFRP1, SFRP2	681	28	19734	2.06986	1	1	0.994133
GOTERM_BP_DIRECT	GO:0007140~male meiotic nuclear division	2	0.271003	0.625638	KCTD19, MAEL	681	28	19734	2.06986	1	1	0.994133
GOTERM_BP_DIRECT	GO:0032880~regulation of protein localization	4	0.542005	0.626048	FKBP1C, TRIM46, BCL2, TRIM58	681	93	19734	1.24636	1	1	0.994133
GOTERM_BP_DIRECT	GO:0048812~neuron projection morphogenesis	3	0.406504	0.626281	KIRREL3, TNIK, PACSIN1	681	61	19734	1.42515	1	1	0.994133
GOTERM_BP_DIRECT	GO:0070534~protein K63-linked ubiquitination	3	0.406504	0.626281	TRAF4, UBE2E2, RNF152	681	61	19734	1.42515	1	1	0.994133
GOTERM_BP_DIRECT	GO:0018105~peptidyl-serine phosphorylation	6	0.813008	0.633123	CAMK1D, PRKCH, MAST4, PRKCE, PRKCQ, PRKD1	681	157	19734	1.10744	1	1	0.994133
GOTERM_BP_DIRECT	GO:0098586~cellular response to virus	4	0.542005	0.633263	IL6, IFNK, CALR, GLI2	681	94	19734	1.23311	1	1	0.994133
GOTERM_BP_DIRECT	GO:0045453~bone resorption	2	0.271003	0.638556	SRC, RAC2	681	29	19734	1.99848	1	1	0.994133
GOTERM_BP_DIRECT	GO:0042026~protein refolding	2	0.271003	0.638556	FKBP1C, HSPA1A	681	29	19734	1.99848	1	1	0.994133
GOTERM_BP_DIRECT	GO:0042104~positive regulation of activated T cell proliferation	2	0.271003	0.638556	CD24, ICOSLG	681	29	19734	1.99848	1	1	0.994133
GOTERM_BP_DIRECT	GO:0099505~regulation of presynaptic membrane potential	2	0.271003	0.638556	GRIN2B, GRIA4	681	29	19734	1.99848	1	1	0.994133
GOTERM_BP_DIRECT	GO:0010043~response to zinc ion	2	0.271003	0.638556	SLC30A8, S100A8	681	29	19734	1.99848	1	1	0.994133
GOTERM_BP_DIRECT	GO:0051453~regulation of intracellular pH	2	0.271003	0.638556	SLC9A7, SLC4A3	681	29	19734	1.99848	1	1	0.994133
GOTERM_BP_DIRECT	GO:0006811~monoatomic ion transport	5	0.677507	0.641404	SLC22A12, SLC9A7, SLC12A1, SLC12A7, SLC22A31	681	127	19734	1.14087	1	1	0.994133
GOTERM_BP_DIRECT	GO:0043547~positive regulation of GTPase activity	5	0.677507	0.641404	BCAR3, SFRP1, PRTN3, GNB5, RGS6	681	127	19734	1.14087	1	1	0.994133
GOTERM_BP_DIRECT	GO:0006487~protein N-linked glycosylation	3	0.406504	0.643811	GFPT2, MGAT5B, FUT4	681	63	19734	1.3799	1	1	0.994133
GOTERM_BP_DIRECT	GO:0034976~response to endoplasmic reticulum stress	4	0.542005	0.647401	TRIB3, P4HB, ATF3, THBS4	681	96	19734	1.20742	1	1	0.994133
GOTERM_BP_DIRECT	GO:0032956~regulation of actin cytoskeleton organization	4	0.542005	0.647401	DAAM2, RAC2, PDGFA, EFNA5	681	96	19734	1.20742	1	1	0.994133
GOTERM_BP_DIRECT	GO:0051260~protein homooligomerization	5	0.677507	0.647498	KCTD19, KCNA5, NLRC4, CARD11, DNM1	681	128	19734	1.13195	1	1	0.994133
GOTERM_BP_DIRECT	GO:1990000~amyloid fibril formation	2	0.271003	0.651029	FKBP1C, SNCA	681	30	19734	1.93186	1	1	0.994133
GOTERM_BP_DIRECT	GO:0009409~response to cold	2	0.271003	0.651029	P2RX3, METRNL	681	30	19734	1.93186	1	1	0.994133
GOTERM_BP_DIRECT	GO:1902042~negative regulation of extrinsic apoptotic signaling pathway via death domain receptors	2	0.271003	0.651029	SFRP2, HGF	681	30	19734	1.93186	1	1	0.994133
GOTERM_BP_DIRECT	GO:0030866~cortical actin cytoskeleton organization	2	0.271003	0.651029	EHD2, CALR	681	30	19734	1.93186	1	1	0.994133
GOTERM_BP_DIRECT	GO:0042476~odontogenesis	2	0.271003	0.651029	SRC, SSUH2	681	30	19734	1.93186	1	1	0.994133
GOTERM_BP_DIRECT	GO:0001778~plasma membrane repair	2	0.271003	0.651029	CAV3, SYTL4	681	30	19734	1.93186	1	1	0.994133
GOTERM_BP_DIRECT	GO:0010592~positive regulation of lamellipodium assembly	2	0.271003	0.651029	AUTS2, RAC2	681	30	19734	1.93186	1	1	0.994133
GOTERM_BP_DIRECT	GO:1903672~positive regulation of sprouting angiogenesis	2	0.271003	0.651029	SMAD1, PKM	681	30	19734	1.93186	1	1	0.994133
GOTERM_BP_DIRECT	GO:0007342~fusion of sperm to egg plasma membrane involved in single fertilization	2	0.271003	0.651029	ROPN1B, FOLR3	681	30	19734	1.93186	1	1	0.994133
GOTERM_BP_DIRECT	GO:0051179~localization	2	0.271003	0.651029	ANK3, SNCA	681	30	19734	1.93186	1	1	0.994133
GOTERM_BP_DIRECT	GO:0007631~feeding behavior	2	0.271003	0.651029	NEGR1, FYN	681	30	19734	1.93186	1	1	0.994133
GOTERM_BP_DIRECT	GO:0001501~skeletal system development	5	0.677507	0.659481	NPR3, MMP9, ETS2, GLI2, FGFR1	681	130	19734	1.11454	1	1	0.994133
GOTERM_BP_DIRECT	GO:0051896~regulation of phosphatidylinositol 3-kinase/protein kinase B signal transduction	2	0.271003	0.663072	PPP1R16B, CAV3	681	31	19734	1.86955	1	1	0.994133
GOTERM_BP_DIRECT	GO:0050772~positive regulation of axonogenesis	2	0.271003	0.663072	CHODL, PLXNA4	681	31	19734	1.86955	1	1	0.994133
GOTERM_BP_DIRECT	GO:0035335~peptidyl-tyrosine dephosphorylation	2	0.271003	0.663072	DUSP5, UBASH3B	681	31	19734	1.86955	1	1	0.994133
GOTERM_BP_DIRECT	GO:0034113~heterotypic cell-cell adhesion	2	0.271003	0.663072	ITGAM, CD200	681	31	19734	1.86955	1	1	0.994133
GOTERM_BP_DIRECT	GO:1900745~positive regulation of p38MAPK cascade	2	0.271003	0.663072	GADD45A, IL1B	681	31	19734	1.86955	1	1	0.994133
GOTERM_BP_DIRECT	GO:0045089~positive regulation of innate immune response	2	0.271003	0.663072	IFNK, FPR2	681	31	19734	1.86955	1	1	0.994133
GOTERM_BP_DIRECT	GO:0030878~thyroid gland development	2	0.271003	0.663072	HOXA3, HOXA5	681	31	19734	1.86955	1	1	0.994133
GOTERM_BP_DIRECT	GO:0034612~response to tumor necrosis factor	2	0.271003	0.663072	AFF3, PTGS2	681	31	19734	1.86955	1	1	0.994133
GOTERM_BP_DIRECT	GO:0007166~cell surface receptor signaling pathway	11	1.49051	0.671783	VAV3, CD86, CDA, CALCRL, ADGRG5, VSTM1, FCER1A, ADGRA3, CD59, FPR2, PTK2	681	321	19734	0.993015	1	1	0.994133
GOTERM_BP_DIRECT	GO:0014059~regulation of dopamine secretion	2	0.271003	0.674701	CHRNA6, SNCA	681	32	19734	1.81112	1	1	0.994133
GOTERM_BP_DIRECT	GO:0015914~phospholipid transport	2	0.271003	0.674701	PRELID2, PLTP	681	32	19734	1.81112	1	1	0.994133
GOTERM_BP_DIRECT	GO:0070050~neuron cellular homeostasis	2	0.271003	0.674701	IL6, MAP1A	681	32	19734	1.81112	1	1	0.994133
GOTERM_BP_DIRECT	GO:0006401~RNA catabolic process	2	0.271003	0.674701	RNASE3, RNASE2	681	32	19734	1.81112	1	1	0.994133
GOTERM_BP_DIRECT	GO:0030534~adult behavior	2	0.271003	0.674701	ALK, SHANK3	681	32	19734	1.81112	1	1	0.994133
GOTERM_BP_DIRECT	GO:0005977~glycogen metabolic process	2	0.271003	0.674701	PPP1R3D, PRKAG2	681	32	19734	1.81112	1	1	0.994133
GOTERM_BP_DIRECT	GO:0001569~branching involved in blood vessel morphogenesis	2	0.271003	0.674701	ACVR1, SFRP2	681	32	19734	1.81112	1	1	0.994133
GOTERM_BP_DIRECT	GO:0021915~neural tube development	2	0.271003	0.674701	DCHS1, GRHL2	681	32	19734	1.81112	1	1	0.994133
GOTERM_BP_DIRECT	GO:0048741~skeletal muscle fiber development	2	0.271003	0.674701	DNER, BCL2	681	32	19734	1.81112	1	1	0.994133
GOTERM_BP_DIRECT	GO:0008150~biological_process	19	2.57453	0.676158	ARPP21, GPR87, URAD, PLEKHA5, TMEM51, TUBA4B, GGTA1, PIK3C2B, XG, TAF7L, PCNX2, SIPA1L1, PRB1, SH3TC1, PRB2, TRIM58, SAMD12, GAL3ST2, FILIP1L	681	568	19734	0.969334	1	1	0.994133
GOTERM_BP_DIRECT	GO:0120162~positive regulation of cold-induced thermogenesis	4	0.542005	0.681033	SCD, ELOVL3, PRDM16, MFAP2	681	101	19734	1.14764	1	1	0.994133
GOTERM_BP_DIRECT	GO:0070301~cellular response to hydrogen peroxide	3	0.406504	0.684784	IL6, SRC, FYN	681	68	19734	1.27844	1	1	0.994133
GOTERM_BP_DIRECT	GO:0001819~positive regulation of cytokine production	3	0.406504	0.684784	IL15, SRC, CLEC5A	681	68	19734	1.27844	1	1	0.994133
GOTERM_BP_DIRECT	GO:0071466~cellular response to xenobiotic stimulus	3	0.406504	0.684784	MEF2C, IL1B, VAV2	681	68	19734	1.27844	1	1	0.994133
GOTERM_BP_DIRECT	GO:0051491~positive regulation of filopodium assembly	2	0.271003	0.685928	DNM3, DPYSL3	681	33	19734	1.75624	1	1	0.994133
GOTERM_BP_DIRECT	GO:0070269~pyroptotic inflammatory response	2	0.271003	0.685928	NLRC4, ELANE	681	33	19734	1.75624	1	1	0.994133
GOTERM_BP_DIRECT	GO:1905606~regulation of presynapse assembly	2	0.271003	0.685928	IL1RAPL1, SNCA	681	33	19734	1.75624	1	1	0.994133
GOTERM_BP_DIRECT	GO:0035924~cellular response to vascular endothelial growth factor stimulus	2	0.271003	0.685928	NR4A1, PRKD1	681	33	19734	1.75624	1	1	0.994133
GOTERM_BP_DIRECT	GO:0000423~mitophagy	2	0.271003	0.685928	GBA1, ARHGAP26	681	33	19734	1.75624	1	1	0.994133
GOTERM_BP_DIRECT	GO:0031638~zymogen activation	2	0.271003	0.685928	HP, SSC5D	681	33	19734	1.75624	1	1	0.994133
GOTERM_BP_DIRECT	GO:0045892~negative regulation of DNA-templated transcription	19	2.57453	0.690208	CIITA, TSHZ3, GFI1, SFMBT2, HDAC9, CBFA2T3, SFRP1, RASD1, SFRP2, MECOM, BCL7A, WT1, PRDM16, MAEL, TRIB3, CALR, PLCB1, TNFRSF4, DPEP3	681	573	19734	0.960875	1	1	0.994133
GOTERM_BP_DIRECT	GO:0010506~regulation of autophagy	3	0.406504	0.692499	DAPK1, ITPR1, TRIB3	681	69	19734	1.25991	1	1	0.994133
GOTERM_BP_DIRECT	GO:0016055~Wnt signaling pathway	6	0.813008	0.696256	WWOX, DAAM2, TNIK, CD24, RSPO4, NKD2	681	169	19734	1.0288	1	1	0.994133
GOTERM_BP_DIRECT	GO:0048568~embryonic organ development	2	0.271003	0.696769	PBX3, DPEP3	681	34	19734	1.70459	1	1	0.994133
GOTERM_BP_DIRECT	GO:0008016~regulation of heart contraction	2	0.271003	0.696769	CAV3, HBEGF	681	34	19734	1.70459	1	1	0.994133
GOTERM_BP_DIRECT	GO:0031663~lipopolysaccharide-mediated signaling pathway	2	0.271003	0.696769	PRKCE, BPI	681	34	19734	1.70459	1	1	0.994133
GOTERM_BP_DIRECT	GO:0042267~natural killer cell mediated cytotoxicity	2	0.271003	0.696769	NKG7, HCST	681	34	19734	1.70459	1	1	0.994133
GOTERM_BP_DIRECT	GO:0045648~positive regulation of erythrocyte differentiation	2	0.271003	0.696769	ACVR2A, HSPA1A	681	34	19734	1.70459	1	1	0.994133
GOTERM_BP_DIRECT	GO:0046676~negative regulation of insulin secretion	2	0.271003	0.696769	SFRP1, SYTL4	681	34	19734	1.70459	1	1	0.994133
GOTERM_BP_DIRECT	GO:0002218~activation of innate immune response	2	0.271003	0.696769	MNDA, NLRC4	681	34	19734	1.70459	1	1	0.994133
GOTERM_BP_DIRECT	GO:0120009~intermembrane lipid transfer	2	0.271003	0.696769	PRELID2, PLTP	681	34	19734	1.70459	1	1	0.994133
GOTERM_BP_DIRECT	GO:0035633~maintenance of blood-brain barrier	2	0.271003	0.696769	IL6, PTGS2	681	34	19734	1.70459	1	1	0.994133
GOTERM_BP_DIRECT	GO:2000379~positive regulation of reactive oxygen species metabolic process	2	0.271003	0.696769	GADD45A, TSPO	681	34	19734	1.70459	1	1	0.994133
GOTERM_BP_DIRECT	GO:0071300~cellular response to retinoic acid	3	0.406504	0.700058	YES1, HOXA2, WNT9A	681	70	19734	1.24191	1	1	0.994133
GOTERM_BP_DIRECT	GO:0032212~positive regulation of telomere maintenance via telomerase	2	0.271003	0.707235	PKIB, PRKCQ	681	35	19734	1.65588	1	1	0.994133
GOTERM_BP_DIRECT	GO:0043330~response to exogenous dsRNA	2	0.271003	0.707235	RFTN1, IFNK	681	35	19734	1.65588	1	1	0.994133
GOTERM_BP_DIRECT	GO:0051966~regulation of synaptic transmission, glutamatergic	2	0.271003	0.707235	MEF2C, GRM7	681	35	19734	1.65588	1	1	0.994133
GOTERM_BP_DIRECT	GO:0045931~positive regulation of mitotic cell cycle	2	0.271003	0.707235	ASNS, SHB	681	35	19734	1.65588	1	1	0.994133
GOTERM_BP_DIRECT	GO:0051085~chaperone cofactor-dependent protein refolding	2	0.271003	0.707235	SDF2L1, HSPA1A	681	35	19734	1.65588	1	1	0.994133
GOTERM_BP_DIRECT	GO:0006909~phagocytosis	3	0.406504	0.707462	ANXA3, CEBPE, ELANE	681	71	19734	1.22442	1	1	0.994133
GOTERM_BP_DIRECT	GO:1990830~cellular response to leukemia inhibitory factor	4	0.542005	0.712222	PTP4A3, KLF5, GFPT2, JARID2	681	106	19734	1.09351	1	1	0.994133
GOTERM_BP_DIRECT	GO:0051607~defense response to virus	8	1.08401	0.716583	IL6, APOBEC3H, CD207, IFNK, BCL2, AZU1, RNASE2, APOBEC3B	681	238	19734	0.97405	1	1	0.994133
GOTERM_BP_DIRECT	GO:0097192~extrinsic apoptotic signaling pathway in absence of ligand	2	0.271003	0.717342	IL1B, BCL2	681	36	19734	1.60989	1	1	0.994133
GOTERM_BP_DIRECT	GO:0061564~axon development	2	0.271003	0.717342	GRM7, PLP1	681	36	19734	1.60989	1	1	0.994133
GOTERM_BP_DIRECT	GO:0071407~cellular response to organic cyclic compound	2	0.271003	0.717342	SMAD1, GLI2	681	36	19734	1.60989	1	1	0.994133
GOTERM_BP_DIRECT	GO:0055074~calcium ion homeostasis	2	0.271003	0.717342	FGFR1, GRIN1	681	36	19734	1.60989	1	1	0.994133
GOTERM_BP_DIRECT	GO:0001975~response to amphetamine	2	0.271003	0.717342	NR4A1, HDAC9	681	36	19734	1.60989	1	1	0.994133
GOTERM_BP_DIRECT	GO:0006303~double-strand break repair via nonhomologous end joining	2	0.271003	0.717342	ATP23, DNTT	681	36	19734	1.60989	1	1	0.994133
GOTERM_BP_DIRECT	GO:0061025~membrane fusion	2	0.271003	0.717342	DPP4, GCA	681	36	19734	1.60989	1	1	0.994133
GOTERM_BP_DIRECT	GO:0045765~regulation of angiogenesis	2	0.271003	0.717342	IL6, SFRP1	681	36	19734	1.60989	1	1	0.994133
GOTERM_BP_DIRECT	GO:0007417~central nervous system development	5	0.677507	0.720378	MARCKSL1, MOG, DNER, MSI2, JARID2	681	141	19734	1.02759	1	1	0.994133
GOTERM_BP_DIRECT	GO:0045184~establishment of protein localization	2	0.271003	0.727099	ANK3, SMYD3	681	37	19734	1.56638	1	1	0.994133
GOTERM_BP_DIRECT	GO:0031333~negative regulation of protein-containing complex assembly	2	0.271003	0.727099	SRC, GBA1	681	37	19734	1.56638	1	1	0.994133
GOTERM_BP_DIRECT	GO:0015701~bicarbonate transport	2	0.271003	0.727099	SLC26A8, SLC4A3	681	37	19734	1.56638	1	1	0.994133
GOTERM_BP_DIRECT	GO:2001244~positive regulation of intrinsic apoptotic signaling pathway	2	0.271003	0.727099	S100A9, S100A8	681	37	19734	1.56638	1	1	0.994133
GOTERM_BP_DIRECT	GO:0006641~triglyceride metabolic process	2	0.271003	0.727099	CAV3, PCSK9	681	37	19734	1.56638	1	1	0.994133
GOTERM_BP_DIRECT	GO:0003180~aortic valve morphogenesis	2	0.271003	0.727099	TIE1, SNAI1	681	37	19734	1.56638	1	1	0.994133
GOTERM_BP_DIRECT	GO:0046326~positive regulation of glucose import	2	0.271003	0.727099	CLTCL1, SORBS1	681	37	19734	1.56638	1	1	0.994133
GOTERM_BP_DIRECT	GO:0048536~spleen development	2	0.271003	0.727099	BCL2, JARID2	681	37	19734	1.56638	1	1	0.994133
GOTERM_BP_DIRECT	GO:0001890~placenta development	2	0.271003	0.727099	HSD17B2, PTK2	681	37	19734	1.56638	1	1	0.994133
GOTERM_BP_DIRECT	GO:0030514~negative regulation of BMP signaling pathway	3	0.406504	0.728762	SFRP1, SFRP2, SOSTDC1	681	74	19734	1.17478	1	1	0.994133
GOTERM_BP_DIRECT	GO:0006874~intracellular calcium ion homeostasis	4	0.542005	0.73544	PKHD1, ATP2C2, CALR, ELANE	681	110	19734	1.05374	1	1	0.994133
GOTERM_BP_DIRECT	GO:0016197~endosomal transport	3	0.406504	0.735564	EHD2, ANXA8L1, ANXA8	681	75	19734	1.15912	1	1	0.994133
GOTERM_BP_DIRECT	GO:0071392~cellular response to estradiol stimulus	2	0.271003	0.736521	SFRP1, POU4F1	681	38	19734	1.52516	1	1	0.994133
GOTERM_BP_DIRECT	GO:0050850~positive regulation of calcium-mediated signaling	2	0.271003	0.736521	LHCGR, P2RX3	681	38	19734	1.52516	1	1	0.994133
GOTERM_BP_DIRECT	GO:0031047~regulatory ncRNA-mediated gene silencing	2	0.271003	0.736521	MAEL, MORC1	681	38	19734	1.52516	1	1	0.994133
GOTERM_BP_DIRECT	GO:2000352~negative regulation of endothelial cell apoptotic process	2	0.271003	0.736521	SEMA5A, ANGPT1	681	38	19734	1.52516	1	1	0.994133
GOTERM_BP_DIRECT	GO:0051321~meiotic cell cycle	3	0.406504	0.74222	BOLL, FAM9B, SLC26A8	681	76	19734	1.14387	1	1	0.994133
GOTERM_BP_DIRECT	GO:0010629~negative regulation of gene expression	10	1.35501	0.745143	MEF2C, SFRP1, SFRP2, SRC, SFMBT2, ITGB8, LRP3, FYN, POU4F1, AFF2	681	310	19734	0.934773	1	1	0.994133
GOTERM_BP_DIRECT	GO:0046907~intracellular transport	2	0.271003	0.745617	DNAJC6, STBD1	681	39	19734	1.48605	1	1	0.994133
GOTERM_BP_DIRECT	GO:0048813~dendrite morphogenesis	2	0.271003	0.745617	DCDC2, FYN	681	39	19734	1.48605	1	1	0.994133
GOTERM_BP_DIRECT	GO:0060391~positive regulation of SMAD protein signal transduction	2	0.271003	0.745617	ACVR1, ACVR2A	681	39	19734	1.48605	1	1	0.994133
GOTERM_BP_DIRECT	GO:0019369~arachidonic acid metabolic process	2	0.271003	0.745617	AWAT1, CYP4F3	681	39	19734	1.48605	1	1	0.994133
GOTERM_BP_DIRECT	GO:0009953~dorsal/ventral pattern formation	2	0.271003	0.745617	ACVR1, HOXA2	681	39	19734	1.48605	1	1	0.994133
GOTERM_BP_DIRECT	GO:0043484~regulation of RNA splicing	3	0.406504	0.748733	AHNAK2, SUPT3H, AFF2	681	77	19734	1.12901	1	1	0.994133
GOTERM_BP_DIRECT	GO:0030326~embryonic limb morphogenesis	2	0.271003	0.7544	FGF9, FGFR1	681	40	19734	1.4489	1	1	0.994133
GOTERM_BP_DIRECT	GO:0034332~adherens junction organization	2	0.271003	0.7544	SRC, CDH24	681	40	19734	1.4489	1	1	0.994133
GOTERM_BP_DIRECT	GO:0006953~acute-phase response	2	0.271003	0.7544	IL6, HP	681	40	19734	1.4489	1	1	0.994133
GOTERM_BP_DIRECT	GO:0033077~T cell differentiation in thymus	2	0.271003	0.7544	BCL2, GBA1	681	40	19734	1.4489	1	1	0.994133
GOTERM_BP_DIRECT	GO:0008625~extrinsic apoptotic signaling pathway via death domain receptors	2	0.271003	0.7544	DAPK1, BCL2	681	40	19734	1.4489	1	1	0.994133
GOTERM_BP_DIRECT	GO:0050767~regulation of neurogenesis	2	0.271003	0.7544	IL1B, POU4F1	681	40	19734	1.4489	1	1	0.994133
GOTERM_BP_DIRECT	GO:1900182~positive regulation of protein localization to nucleus	2	0.271003	0.7544	SRC, FYN	681	40	19734	1.4489	1	1	0.994133
GOTERM_BP_DIRECT	GO:0032729~positive regulation of type II interferon production	3	0.406504	0.755103	IL1B, HLA-DPB1, HLA-DPA1	681	78	19734	1.11454	1	1	0.994133
GOTERM_BP_DIRECT	GO:0009636~response to toxic substance	3	0.406504	0.755103	GUCY2C, BCL2, GLYAT	681	78	19734	1.11454	1	1	0.994133
GOTERM_BP_DIRECT	GO:0030041~actin filament polymerization	2	0.271003	0.76288	COBL, MSRB1	681	41	19734	1.41356	1	1	0.994133
GOTERM_BP_DIRECT	GO:0032435~negative regulation of proteasomal ubiquitin-dependent protein catabolic process	2	0.271003	0.76288	MAP1A, FHIT	681	41	19734	1.41356	1	1	0.994133
GOTERM_BP_DIRECT	GO:0043537~negative regulation of blood vessel endothelial cell migration	2	0.271003	0.76288	MEF2C, GADD45A	681	41	19734	1.41356	1	1	0.994133
GOTERM_BP_DIRECT	GO:0007565~female pregnancy	3	0.406504	0.767426	PZP, PSG6, BCL2	681	80	19734	1.08667	1	1	0.994133
GOTERM_BP_DIRECT	GO:0032088~negative regulation of NF-kappaB transcription factor activity	3	0.406504	0.767426	PKHD1, GFI1, CD200	681	80	19734	1.08667	1	1	0.994133
GOTERM_BP_DIRECT	GO:0019933~cAMP-mediated signaling	2	0.271003	0.771068	PDE7B, PDE9A	681	42	19734	1.3799	1	1	0.994133
GOTERM_BP_DIRECT	GO:0042307~positive regulation of protein import into nucleus	2	0.271003	0.771068	PRKD1, PTGS2	681	42	19734	1.3799	1	1	0.994133
GOTERM_BP_DIRECT	GO:0030177~positive regulation of Wnt signaling pathway	2	0.271003	0.771068	SFRP1, RSPO4	681	42	19734	1.3799	1	1	0.994133
GOTERM_BP_DIRECT	GO:0051017~actin filament bundle assembly	2	0.271003	0.771068	DPYSL3, ESPN	681	42	19734	1.3799	1	1	0.994133
GOTERM_BP_DIRECT	GO:0008283~cell population proliferation	5	0.677507	0.772836	RHBDF1, OCA2, MARCKSL1, MAB21L2, FAM83B	681	152	19734	0.953223	1	1	0.994133
GOTERM_BP_DIRECT	GO:0051028~mRNA transport	3	0.406504	0.773383	NPIPA8, IGF2BP3, IGF2BP2	681	81	19734	1.07326	1	1	0.994133
GOTERM_BP_DIRECT	GO:0001933~negative regulation of protein phosphorylation	3	0.406504	0.773383	MAS1, ANGPT1, CD109	681	81	19734	1.07326	1	1	0.994133
GOTERM_BP_DIRECT	GO:0030336~negative regulation of cell migration	6	0.813008	0.77617	SFRP1, SFRP2, TIE1, DPYSL3, BCL2, TMEM196	681	187	19734	0.929775	1	1	0.994133
GOTERM_BP_DIRECT	GO:0006887~exocytosis	4	0.542005	0.777406	EXOC3L4, DOC2B, SYTL4, NKD2	681	118	19734	0.982304	1	1	0.994133
GOTERM_BP_DIRECT	GO:0035249~synaptic transmission, glutamatergic	2	0.271003	0.778974	GRIN2B, GRIA4	681	43	19734	1.34781	1	1	0.994133
GOTERM_BP_DIRECT	GO:0048856~anatomical structure development	2	0.271003	0.778974	EGFL7, PAX3	681	43	19734	1.34781	1	1	0.994133
GOTERM_BP_DIRECT	GO:0046427~positive regulation of receptor signaling pathway via JAK-STAT	2	0.271003	0.778974	IL6, IL5	681	43	19734	1.34781	1	1	0.994133
GOTERM_BP_DIRECT	GO:0001942~hair follicle development	2	0.271003	0.778974	CD109, PDGFA	681	43	19734	1.34781	1	1	0.994133
GOTERM_BP_DIRECT	GO:0006813~potassium ion transport	3	0.406504	0.779207	KCNH4, KCNA5, KCNK1	681	82	19734	1.06017	1	1	0.994133
GOTERM_BP_DIRECT	GO:0009966~regulation of signal transduction	2	0.271003	0.786606	SOCS2, VEPH1	681	44	19734	1.31718	1	1	0.994133
GOTERM_BP_DIRECT	GO:0045429~positive regulation of nitric oxide biosynthetic process	2	0.271003	0.786606	IL1B, PTGS2	681	44	19734	1.31718	1	1	0.994133
GOTERM_BP_DIRECT	GO:0000132~establishment of mitotic spindle orientation	2	0.271003	0.786606	PKHD1, GPSM1	681	44	19734	1.31718	1	1	0.994133
GOTERM_BP_DIRECT	GO:0006865~amino acid transport	2	0.271003	0.786606	SLC7A10, SLC38A4	681	44	19734	1.31718	1	1	0.994133
GOTERM_BP_DIRECT	GO:0001822~kidney development	4	0.542005	0.787001	PKHD1, WT1, PCSK9, GLI2	681	120	19734	0.965932	1	1	0.994133
GOTERM_BP_DIRECT	GO:0030316~osteoclast differentiation	2	0.271003	0.793976	SFRP1, GPR183	681	45	19734	1.28791	1	1	0.994133
GOTERM_BP_DIRECT	GO:0042177~negative regulation of protein catabolic process	2	0.271003	0.793976	AZIN2, FYN	681	45	19734	1.28791	1	1	0.994133
GOTERM_BP_DIRECT	GO:0045214~sarcomere organization	2	0.271003	0.793976	OBSCN, SYNPO2L	681	45	19734	1.28791	1	1	0.994133
GOTERM_BP_DIRECT	GO:0046627~negative regulation of insulin receptor signaling pathway	2	0.271003	0.801091	IL1B, PRKCQ	681	46	19734	1.25991	1	1	0.994133
GOTERM_BP_DIRECT	GO:1990573~potassium ion import across plasma membrane	2	0.271003	0.801091	SLC12A1, SLC12A7	681	46	19734	1.25991	1	1	0.994133
GOTERM_BP_DIRECT	GO:0045663~positive regulation of myoblast differentiation	2	0.271003	0.801091	MEF2C, PLCB1	681	46	19734	1.25991	1	1	0.994133
GOTERM_BP_DIRECT	GO:0043409~negative regulation of MAPK cascade	2	0.271003	0.801091	DUSP5, CAV3	681	46	19734	1.25991	1	1	0.994133
GOTERM_BP_DIRECT	GO:0043434~response to peptide hormone	2	0.271003	0.801091	STAT4, GNAI1	681	46	19734	1.25991	1	1	0.994133
GOTERM_BP_DIRECT	GO:0045071~negative regulation of viral genome replication	2	0.271003	0.801091	SLPI, LTF	681	46	19734	1.25991	1	1	0.994133
GOTERM_BP_DIRECT	GO:0006351~DNA-templated transcription	3	0.406504	0.806394	SMAD1, CEBPE, CBFA2T3	681	87	19734	0.99924	1	1	0.994133
GOTERM_BP_DIRECT	GO:0001508~action potential	2	0.271003	0.807961	AKAP6, KCNA5	681	47	19734	1.23311	1	1	0.994133
GOTERM_BP_DIRECT	GO:0007259~cell surface receptor signaling pathway via JAK-STAT	2	0.271003	0.807961	SOCS2, STAT4	681	47	19734	1.23311	1	1	0.994133
GOTERM_BP_DIRECT	GO:0032092~positive regulation of protein binding	2	0.271003	0.807961	FKBP1C, TRIB3	681	47	19734	1.23311	1	1	0.994133
GOTERM_BP_DIRECT	GO:0032689~negative regulation of type II interferon production	2	0.271003	0.807961	PGLYRP1, HLA-DRB1	681	47	19734	1.23311	1	1	0.994133
GOTERM_BP_DIRECT	GO:0120163~negative regulation of cold-induced thermogenesis	2	0.271003	0.814595	IL15, NPR3	681	48	19734	1.20742	1	1	0.994133
GOTERM_BP_DIRECT	GO:0042149~cellular response to glucose starvation	2	0.271003	0.814595	BCL2, ASNS	681	48	19734	1.20742	1	1	0.994133
GOTERM_BP_DIRECT	GO:0001568~blood vessel development	2	0.271003	0.820999	MEF2C, EGFL7	681	49	19734	1.18277	1	1	0.994133
GOTERM_BP_DIRECT	GO:0006513~protein monoubiquitination	2	0.271003	0.827182	RNF152, RNF220	681	50	19734	1.15912	1	1	0.994133
GOTERM_BP_DIRECT	GO:0014823~response to activity	2	0.271003	0.827182	MAS1, IL6	681	50	19734	1.15912	1	1	0.994133
GOTERM_BP_DIRECT	GO:0051209~release of sequestered calcium ion into cytosol	2	0.271003	0.833152	ITPR1, PLCB1	681	51	19734	1.13639	1	1	0.994133
GOTERM_BP_DIRECT	GO:0008630~intrinsic apoptotic signaling pathway in response to DNA damage	2	0.271003	0.833152	MAEL, BCL2	681	51	19734	1.13639	1	1	0.994133
GOTERM_BP_DIRECT	GO:0045747~positive regulation of Notch signaling pathway	2	0.271003	0.833152	SRC, TSPAN5	681	51	19734	1.13639	1	1	0.994133
GOTERM_BP_DIRECT	GO:0030838~positive regulation of actin filament polymerization	2	0.271003	0.833152	CARMIL1, PRKCE	681	51	19734	1.13639	1	1	0.994133
GOTERM_BP_DIRECT	GO:0031648~protein destabilization	2	0.271003	0.838917	SRC, SNCA	681	52	19734	1.11454	1	1	0.994133
GOTERM_BP_DIRECT	GO:0070371~ERK1 and ERK2 cascade	2	0.271003	0.838917	DUSP5, EGF	681	52	19734	1.11454	1	1	0.994133
GOTERM_BP_DIRECT	GO:0070936~protein K48-linked ubiquitination	3	0.406504	0.843725	ZNRF1, UBE2E2, RNF152	681	95	19734	0.915094	1	1	0.994133
GOTERM_BP_DIRECT	GO:0007519~skeletal muscle tissue development	2	0.271003	0.844482	MEF2C, FLNB	681	53	19734	1.09351	1	1	0.994133
GOTERM_BP_DIRECT	GO:0001932~regulation of protein phosphorylation	2	0.271003	0.844482	ROPN1B, PTK2	681	53	19734	1.09351	1	1	0.994133
GOTERM_BP_DIRECT	GO:0009566~fertilization	2	0.271003	0.844482	ASTL, MAEL	681	53	19734	1.09351	1	1	0.994133
GOTERM_BP_DIRECT	GO:0016339~calcium-dependent cell-cell adhesion via plasma membrane cell adhesion molecules	2	0.271003	0.844482	CDH24, DCHS1	681	53	19734	1.09351	1	1	0.994133
GOTERM_BP_DIRECT	GO:0031122~cytoplasmic microtubule organization	2	0.271003	0.844482	CLIP2, CAV3	681	53	19734	1.09351	1	1	0.994133
GOTERM_BP_DIRECT	GO:0007249~canonical NF-kappaB signal transduction	2	0.271003	0.844482	DEFB124, CARD11	681	53	19734	1.09351	1	1	0.994133
GOTERM_BP_DIRECT	GO:0003151~outflow tract morphogenesis	2	0.271003	0.844482	MEF2C, SFRP2	681	53	19734	1.09351	1	1	0.994133
GOTERM_BP_DIRECT	GO:0097191~extrinsic apoptotic signaling pathway	2	0.271003	0.844482	WWOX, SFRP1	681	53	19734	1.09351	1	1	0.994133
GOTERM_BP_DIRECT	GO:0048146~positive regulation of fibroblast proliferation	2	0.271003	0.849855	LIF, PDGFA	681	54	19734	1.07326	1	1	0.994133
GOTERM_BP_DIRECT	GO:0002376~immune system process	2	0.271003	0.849855	HP, VSTM1	681	54	19734	1.07326	1	1	0.994133
GOTERM_BP_DIRECT	GO:0070830~bicellular tight junction assembly	2	0.271003	0.849855	CLDN2, GRHL2	681	54	19734	1.07326	1	1	0.994133
GOTERM_BP_DIRECT	GO:0071320~cellular response to cAMP	2	0.271003	0.849855	WT1, AKAP6	681	54	19734	1.07326	1	1	0.994133
GOTERM_BP_DIRECT	GO:0071356~cellular response to tumor necrosis factor	4	0.542005	0.851982	AKAP12, SFRP1, GBA1, TNFRSF21	681	136	19734	0.852293	1	1	0.994133
GOTERM_BP_DIRECT	GO:0006612~protein targeting to membrane	2	0.271003	0.855043	RTP5, ZDHHC19	681	55	19734	1.05374	1	1	0.994133
GOTERM_BP_DIRECT	GO:0035176~social behavior	2	0.271003	0.855043	AVPR1A, SHANK3	681	55	19734	1.05374	1	1	0.994133
GOTERM_BP_DIRECT	GO:0045786~negative regulation of cell cycle	2	0.271003	0.855043	NR4A1, PTGS2	681	55	19734	1.05374	1	1	0.994133
GOTERM_BP_DIRECT	GO:0050680~negative regulation of epithelial cell proliferation	2	0.271003	0.855043	SFRP1, SFRP2	681	55	19734	1.05374	1	1	0.994133
GOTERM_BP_DIRECT	GO:0030317~flagellated sperm motility	3	0.406504	0.855953	ROPN1B, PLTP, TTLL9	681	98	19734	0.887081	1	1	0.994133
GOTERM_BP_DIRECT	GO:0030855~epithelial cell differentiation	3	0.406504	0.855953	SULT1B1, WT1, ALDOC	681	98	19734	0.887081	1	1	0.994133
GOTERM_BP_DIRECT	GO:0006644~phospholipid metabolic process	2	0.271003	0.860052	PCSK9, SNCA	681	56	19734	1.03493	1	1	0.994133
GOTERM_BP_DIRECT	GO:0042472~inner ear morphogenesis	2	0.271003	0.860052	FGF9, FGFR1	681	56	19734	1.03493	1	1	0.994133
GOTERM_BP_DIRECT	GO:0007286~spermatid development	3	0.406504	0.867301	OCA2, FAM9B, TDRD5	681	101	19734	0.860732	1	1	0.994133
GOTERM_BP_DIRECT	GO:0050727~regulation of inflammatory response	3	0.406504	0.867301	MAS1, SEMA7A, PTGS2	681	101	19734	0.860732	1	1	0.994133
GOTERM_BP_DIRECT	GO:0090630~activation of GTPase activity	3	0.406504	0.867301	ARHGAP22, SIPA1L1, NGEF	681	101	19734	0.860732	1	1	0.994133
GOTERM_BP_DIRECT	GO:0006486~protein glycosylation	3	0.406504	0.867301	ST8SIA6, FUT2, FUT4	681	101	19734	0.860732	1	1	0.994133
GOTERM_BP_DIRECT	GO:2000134~negative regulation of G1/S transition of mitotic cell cycle	2	0.271003	0.869557	ACVR1, BCL2	681	58	19734	0.99924	1	1	0.994133
GOTERM_BP_DIRECT	GO:0007601~visual perception	6	0.813008	0.869609	ABLIM1, PDE6H, TACSTD2, CNGB3, KIFC3, NXNL2	681	216	19734	0.804944	1	1	0.994133
GOTERM_BP_DIRECT	GO:0007049~cell cycle	9	1.21951	0.873588	TMPRSS11A, TXNL4B, SRC, GADD45A, PPP1R1C, PRKCE, CABLES1, KLHL13, GNAI1	681	324	19734	0.804944	1	1	0.994133
GOTERM_BP_DIRECT	GO:0006986~response to unfolded protein	2	0.271003	0.874066	THBS4, HSPA1A	681	59	19734	0.982304	1	1	0.994133
GOTERM_BP_DIRECT	GO:0032755~positive regulation of interleukin-6 production	3	0.406504	0.874405	IL6, IL1B, INAVA	681	103	19734	0.844019	1	1	0.994133
GOTERM_BP_DIRECT	GO:0034446~substrate adhesion-dependent cell spreading	2	0.271003	0.878418	SRC, NTN5	681	60	19734	0.965932	1	1	0.994133
GOTERM_BP_DIRECT	GO:0007584~response to nutrient	2	0.271003	0.878418	SFRP2, CYBB	681	60	19734	0.965932	1	1	0.994133
GOTERM_BP_DIRECT	GO:0007254~JNK cascade	2	0.271003	0.88262	IL1B, FGF12	681	61	19734	0.950097	1	1	0.994133
GOTERM_BP_DIRECT	GO:0010507~negative regulation of autophagy	2	0.271003	0.88262	HGF, BCL2	681	61	19734	0.950097	1	1	0.994133
GOTERM_BP_DIRECT	GO:0051123~RNA polymerase II preinitiation complex assembly	2	0.271003	0.886678	TAF7L, SUPT3H	681	62	19734	0.934773	1	1	0.994133
GOTERM_BP_DIRECT	GO:0000278~mitotic cell cycle	4	0.542005	0.888681	HGF, CLTCL1, TUBA4B, TUBA4A	681	148	19734	0.783188	1	1	0.994133
GOTERM_BP_DIRECT	GO:0051225~spindle assembly	2	0.271003	0.890595	STARD9, GOLGA8A	681	63	19734	0.919936	1	1	0.994133
GOTERM_BP_DIRECT	GO:0007266~Rho protein signal transduction	2	0.271003	0.890595	ROPN1B, GNA12	681	63	19734	0.919936	1	1	0.994133
GOTERM_BP_DIRECT	GO:0051289~protein homotetramerization	2	0.271003	0.894377	ITPR1, DNM1	681	64	19734	0.905562	1	1	0.994133
GOTERM_BP_DIRECT	GO:0042552~myelination	2	0.271003	0.894377	TMEM163, TNFRSF21	681	64	19734	0.905562	1	1	0.994133
GOTERM_BP_DIRECT	GO:0006006~glucose metabolic process	2	0.271003	0.898028	HK3, G6PD	681	65	19734	0.89163	1	1	0.994133
GOTERM_BP_DIRECT	GO:0030199~collagen fibril organization	2	0.271003	0.898028	COLGALT2, SFRP2	681	65	19734	0.89163	1	1	0.994133
GOTERM_BP_DIRECT	GO:0043525~positive regulation of neuron apoptotic process	2	0.271003	0.898028	PCSK9, POU4F1	681	65	19734	0.89163	1	1	0.994133
GOTERM_BP_DIRECT	GO:0006357~regulation of transcription by RNA polymerase II	48	6.50407	0.898714	ZNF331, CSRNP1, ZBTB8A, RHOXF2, HLF, TSHZ3, ZBTB46, CEBPE, SATB2, GFI1, HR, ETS2, BACH2, GLI2, PDLIM1, MECOM, BCL7A, PRDM16, HOXA3, STAT4, HIVEP3, HOXA6, ZNF521, HOXA5, SPDEF, SMAD1, ZFP92, PBX3, PAX3, POU4F1, GRHL2, MYT1, SUPT3H, FOXR1, NR4A1, NR4A3, NR6A1, KLF5, WT1, MAFF, ZNF30, AHRR, TCF4, NANOG, ZNF534, MAMLD1, ATF3, ZNF157	681	1606	19734	0.866091	1	1	0.994133
GOTERM_BP_DIRECT	GO:0030216~keratinocyte differentiation	2	0.271003	0.904957	CSTA, GRHL2	681	67	19734	0.865014	1	1	0.994133
GOTERM_BP_DIRECT	GO:0032981~mitochondrial respiratory chain complex I assembly	2	0.271003	0.904957	NUBPL, NDUFAF2	681	67	19734	0.865014	1	1	0.994133
GOTERM_BP_DIRECT	GO:0042593~glucose homeostasis	3	0.406504	0.907579	GPI, IL6, CAV3	681	114	19734	0.762578	1	1	0.994133
GOTERM_BP_DIRECT	GO:0006974~DNA damage response	8	1.08401	0.908007	VAV3, IMMP2L, GADD45A, GFI1, MACROD1, BCL2, UBE2E2, MNDA	681	307	19734	0.755126	1	1	0.994133
GOTERM_BP_DIRECT	GO:0007623~circadian rhythm	2	0.271003	0.908243	F7, HTR7	681	68	19734	0.852293	1	1	0.994133
GOTERM_BP_DIRECT	GO:0006366~transcription by RNA polymerase II	6	0.813008	0.911004	SMAD1, NR4A1, SLC40A1, GTF2IRD1, SUPT3H, SPDEF	681	235	19734	0.739863	1	1	0.994133
GOTERM_BP_DIRECT	GO:0045668~negative regulation of osteoblast differentiation	2	0.271003	0.911416	SFRP1, HOXA2	681	69	19734	0.839941	1	1	0.994133
GOTERM_BP_DIRECT	GO:0006493~protein O-linked glycosylation	2	0.271003	0.911416	ST8SIA6, FUT4	681	69	19734	0.839941	1	1	0.994133
GOTERM_BP_DIRECT	GO:0006814~sodium ion transport	2	0.271003	0.911416	SLC10A4, SCN4B	681	69	19734	0.839941	1	1	0.994133
GOTERM_BP_DIRECT	GO:0006914~autophagy	4	0.542005	0.91281	BCL2, GBA1, S100A9, S100A8	681	158	19734	0.73362	1	1	0.994133
GOTERM_BP_DIRECT	GO:0007608~sensory perception of smell	3	0.406504	0.915091	OR51M1, OR51B5, NXNL2	681	117	19734	0.743025	1	1	0.994133
GOTERM_BP_DIRECT	GO:0032259~methylation	4	0.542005	0.917025	MECOM, PRDM16, DNMT3B, SMYD3	681	160	19734	0.724449	1	1	0.994133
GOTERM_BP_DIRECT	GO:0032456~endocytic recycling	2	0.271003	0.917437	EHD2, RAB17	681	71	19734	0.816281	1	1	0.994133
GOTERM_BP_DIRECT	GO:0008286~insulin receptor signaling pathway	2	0.271003	0.917437	BCAR3, SORBS1	681	71	19734	0.816281	1	1	0.994133
GOTERM_BP_DIRECT	GO:0030163~protein catabolic process	2	0.271003	0.920292	FYN, ELANE	681	72	19734	0.804944	1	1	0.994133
GOTERM_BP_DIRECT	GO:0002244~hematopoietic progenitor cell differentiation	2	0.271003	0.923049	SFRP1, DOCK1	681	73	19734	0.793917	1	1	0.994133
GOTERM_BP_DIRECT	GO:0050808~synapse organization	2	0.271003	0.92571	MUSK, SNCA	681	74	19734	0.783188	1	1	0.994133
GOTERM_BP_DIRECT	GO:0070588~calcium ion transmembrane transport	3	0.406504	0.932414	P2RX3, FKBP1C, ATP2C2	681	125	19734	0.695471	1	1	0.994133
GOTERM_BP_DIRECT	GO:0006629~lipid metabolic process	5	0.677507	0.932541	G6PD, SDS, AWAT1, FUT2, PLTP	681	209	19734	0.693253	1	1	0.994133
GOTERM_BP_DIRECT	GO:0031398~positive regulation of protein ubiquitination	2	0.271003	0.933155	ANGPT1, INAVA	681	77	19734	0.752675	1	1	0.994133
GOTERM_BP_DIRECT	GO:0021987~cerebral cortex development	2	0.271003	0.935468	PHACTR1, PLCB1	681	78	19734	0.743025	1	1	0.994133
GOTERM_BP_DIRECT	GO:0070373~negative regulation of ERK1 and ERK2 cascade	2	0.271003	0.9377	LIF, ATF3	681	79	19734	0.73362	1	1	0.994133
GOTERM_BP_DIRECT	GO:0001843~neural tube closure	2	0.271003	0.9377	COBL, GRHL2	681	79	19734	0.73362	1	1	0.994133
GOTERM_BP_DIRECT	GO:0032720~negative regulation of tumor necrosis factor production	2	0.271003	0.9377	TSPO, BPI	681	79	19734	0.73362	1	1	0.994133
GOTERM_BP_DIRECT	GO:0071347~cellular response to interleukin-1	2	0.271003	0.939856	AKAP12, SFRP1	681	80	19734	0.724449	1	1	0.994133
GOTERM_BP_DIRECT	GO:0030324~lung development	2	0.271003	0.943946	FGF9, GLI2	681	82	19734	0.70678	1	1	0.994133
GOTERM_BP_DIRECT	GO:0007030~Golgi organization	3	0.406504	0.944776	PRKD1, KIFC3, GOLGA8A	681	132	19734	0.65859	1	1	0.994133
GOTERM_BP_DIRECT	GO:0007224~smoothened signaling pathway	2	0.271003	0.949566	FGF9, GLI2	681	85	19734	0.681835	1	1	0.994133
GOTERM_BP_DIRECT	GO:0006338~chromatin remodeling	8	1.08401	0.953515	NPM2, MECOM, BCL7A, SATB2, PRDM16, HR, JARID2, DPEP3	681	343	19734	0.675871	1	1	0.994133
GOTERM_BP_DIRECT	GO:0031647~regulation of protein stability	2	0.271003	0.956194	DDI1, BCL2	681	89	19734	0.65119	1	1	0.994133
GOTERM_BP_DIRECT	GO:0016042~lipid catabolic process	2	0.271003	0.95771	LIPM, PLCB1	681	90	19734	0.643955	1	1	0.994133
GOTERM_BP_DIRECT	GO:0036503~ERAD pathway	2	0.271003	0.961952	SDF2L1, CALR	681	93	19734	0.623182	1	1	0.994133
GOTERM_BP_DIRECT	GO:0006511~ubiquitin-dependent protein catabolic process	5	0.677507	0.963475	SPSB1, KCTD19, KLHL25, TRIM58, UBQLN3	681	235	19734	0.616553	1	1	0.994133
GOTERM_BP_DIRECT	GO:0006355~regulation of DNA-templated transcription	22	2.98103	0.964081	ZNF331, MEF2C, BNC2, AEBP1, AFF3, MYT1, SUPT3H, SCRT1, GLI2, MN1, PTP4A3, ZNF618, WT1, ZNF30, IFNK, SNAI1, GTF2IRD1, NANOG, PRKCQ, ZNF534, CALR, SSBP2	681	858	19734	0.743025	1	1	0.994133
GOTERM_BP_DIRECT	GO:0006631~fatty acid metabolic process	2	0.271003	0.964541	ACOT12, SNCA	681	95	19734	0.610063	1	1	0.994133
GOTERM_BP_DIRECT	GO:0006417~regulation of translation	2	0.271003	0.966954	IGF2BP2, MSI2	681	97	19734	0.597484	1	1	0.994133
GOTERM_BP_DIRECT	GO:0035264~multicellular organism growth	2	0.271003	0.968098	GRHL2, HOXA5	681	98	19734	0.591387	1	1	0.994133
GOTERM_BP_DIRECT	GO:0005975~carbohydrate metabolic process	3	0.406504	0.968391	GPI, FUT2, FUT4	681	151	19734	0.575721	1	1	0.994133
GOTERM_BP_DIRECT	GO:0006886~intracellular protein transport	6	0.813008	0.968713	RAB5B, RAB20, CLTCL1, RAB17, SYTL4, RAMP1	681	283	19734	0.614374	1	1	0.994133
GOTERM_BP_DIRECT	GO:0008380~RNA splicing	4	0.542005	0.971221	RBFOX1, WT1, RBM11, AFF2	681	201	19734	0.576676	1	1	0.994133
GOTERM_BP_DIRECT	GO:0006606~protein import into nucleus	2	0.271003	0.976771	FGF9, FAM53A	681	107	19734	0.541644	1	1	0.994133
GOTERM_BP_DIRECT	GO:0009615~response to virus	2	0.271003	0.979103	IFNK, ITGB8	681	110	19734	0.526872	1	1	0.994133
GOTERM_BP_DIRECT	GO:0007218~neuropeptide signaling pathway	2	0.271003	0.981201	CYSLTR2, PDYN	681	113	19734	0.512884	1	1	0.994133
GOTERM_BP_DIRECT	GO:0006457~protein folding	3	0.406504	0.981574	FKBP1C, P4HB, CALR	681	169	19734	0.514402	1	1	0.994133
GOTERM_BP_DIRECT	GO:0016567~protein ubiquitination	10	1.35501	0.984078	SOCS2, SH3RF3, SPSB1, KLHL25, FYN, TRIM15, KLHL13, RNF152, SH3RF1, RNF220	681	474	19734	0.61135	1	1	0.994133
GOTERM_BP_DIRECT	GO:0009617~response to bacterium	2	0.271003	0.984787	CUBN, SCN7A	681	119	19734	0.487025	1	1	0.994133
GOTERM_BP_DIRECT	GO:0016192~vesicle-mediated transport	4	0.542005	0.985803	STBD1, SSC5D, RAB17, NCALD	681	227	19734	0.510625	1	1	0.994133
GOTERM_BP_DIRECT	GO:0051726~regulation of cell cycle	4	0.542005	0.98983	MECOM, GADD45A, CABLES1, POU4F1	681	239	19734	0.484987	1	1	0.994133
GOTERM_BP_DIRECT	GO:0006397~mRNA processing	4	0.542005	0.990384	RBFOX1, KHDRBS2, RBM11, AFF2	681	241	19734	0.480962	1	1	0.994133
GOTERM_BP_DIRECT	GO:0043161~proteasome-mediated ubiquitin-dependent protein catabolic process	4	0.542005	0.992323	ZNRF1, SPSB1, TRAF4, GBA1	681	249	19734	0.46551	1	1	0.994133
GOTERM_BP_DIRECT	GO:1902600~proton transmembrane transport	2	0.271003	0.992491	SLC9A7, ATP6V0A4	681	139	19734	0.416949	1	1	0.994133
GOTERM_BP_DIRECT	GO:0065003~protein-containing complex assembly	2	0.271003	0.992751	RBPMS, JCHAIN	681	140	19734	0.413971	1	1	0.994133
GOTERM_BP_DIRECT	GO:0008104~protein localization	2	0.271003	0.995421	CAV3, DOC2B	681	153	19734	0.378797	1	1	0.995421
GOTERM_BP_DIRECT	GO:0050911~detection of chemical stimulus involved in sensory perception of smell	7	0.948509	0.997585	OR1B1, OR2AJ1, OR2W3, OR1L6, OR51M1, OR51B5, OR2T33	681	433	19734	0.468466	1	1	0.997585
GOTERM_BP_DIRECT	GO:0000209~protein polyubiquitination	2	0.271003	0.998109	BCL2, TRIM58	681	178	19734	0.325595	1	1	0.998109
GOTERM_BP_DIRECT	GO:0015031~protein transport	6	0.813008	0.998839	RHBDF1, CD63, NPIPA8, CALCRL, RAMP1, LRP1B	681	415	19734	0.418959	1	1	0.998839
GOTERM_BP_DIRECT	GO:0051301~cell division	5	0.677507	0.999322	PPP1R1C, PRKCE, CABLES1, KLHL13, GNAI1	681	385	19734	0.376337	1	1	0.999322
GOTERM_BP_DIRECT	GO:0050821~protein stabilization	2	0.271003	0.999782	CALR, HSPA1A	681	239	19734	0.242494	1	1	0.999782
GOTERM_BP_DIRECT	GO:0006281~DNA repair	2	0.271003	0.99992	GADD45A, CDC14B	681	267	19734	0.217063	1	1	0.99992
GOTERM_BP_DIRECT	GO:0042221~response to chemical	1	0.135501	1	GRIN1	681	2	19734	14.489	1	1	1
GOTERM_BP_DIRECT	GO:0007175~negative regulation of epidermal growth factor-activated receptor activity	1	0.135501	1	GPRC5A	681	14	19734	2.06986	1	1	1
GOTERM_BP_DIRECT	GO:0006396~RNA processing	1	0.135501	1	RBPMS	681	556	19734	0.0521187	1	1	1
GOTERM_BP_DIRECT	GO:0033280~response to vitamin D	1	0.135501	1	PTGS2	681	19	19734	1.52516	1	1	1
GOTERM_BP_DIRECT	GO:0051205~protein insertion into membrane	1	0.135501	1	RTP5	681	8	19734	3.62225	1	1	1
GOTERM_BP_DIRECT	GO:0035733~hepatic stellate cell activation	1	0.135501	1	AKAP12	681	2	19734	14.489	1	1	1
GOTERM_BP_DIRECT	GO:2000243~positive regulation of reproductive process	1	0.135501	1	FGF9	681	4	19734	7.24449	1	1	1
GOTERM_BP_DIRECT	GO:0031424~keratinization	1	0.135501	1	HRNR	681	78	19734	0.371512	1	1	1
GOTERM_BP_DIRECT	GO:0099173~postsynapse organization	1	0.135501	1	DNM3	681	14	19734	2.06986	1	1	1
GOTERM_BP_DIRECT	GO:0019538~protein metabolic process	1	0.135501	1	CTSG	681	18	19734	1.60989	1	1	1
GOTERM_BP_DIRECT	GO:0061462~protein localization to lysosome	1	0.135501	1	SH3BP4	681	15	19734	1.93186	1	1	1
GOTERM_BP_DIRECT	GO:0001937~negative regulation of endothelial cell proliferation	1	0.135501	1	PTPRM	681	39	19734	0.743025	1	1	1
GOTERM_BP_DIRECT	GO:0035106~operant conditioning	1	0.135501	1	TACR1	681	4	19734	7.24449	1	1	1
GOTERM_BP_DIRECT	GO:0061669~spontaneous neurotransmitter secretion	1	0.135501	1	DOC2B	681	9	19734	3.21977	1	1	1
GOTERM_BP_DIRECT	GO:0009064~glutamine family amino acid metabolic process	1	0.135501	1	RIMKLA	681	2	19734	14.489	1	1	1
GOTERM_BP_DIRECT	GO:0050885~neuromuscular process controlling balance	1	0.135501	1	SHANK3	681	47	19734	0.616553	1	1	1
GOTERM_BP_DIRECT	GO:0030836~positive regulation of actin filament depolymerization	1	0.135501	1	SEMA5A	681	8	19734	3.62225	1	1	1
GOTERM_BP_DIRECT	GO:0032848~negative regulation of cellular pH reduction	1	0.135501	1	BCL2	681	1	19734	28.978	1	1	1
GOTERM_BP_DIRECT	GO:0051754~meiotic sister chromatid cohesion, centromeric	1	0.135501	1	MEIKIN	681	4	19734	7.24449	1	1	1
GOTERM_BP_DIRECT	GO:0046390~ribose phosphate biosynthetic process	1	0.135501	1	G6PD	681	1	19734	28.978	1	1	1
GOTERM_BP_DIRECT	GO:0010266~response to vitamin B1	1	0.135501	1	TSPO	681	2	19734	14.489	1	1	1
GOTERM_BP_DIRECT	GO:0061640~cytoskeleton-dependent cytokinesis	1	0.135501	1	ROPN1B	681	24	19734	1.20742	1	1	1
GOTERM_BP_DIRECT	GO:0060325~face morphogenesis	1	0.135501	1	CSRNP1	681	32	19734	0.905562	1	1	1
GOTERM_BP_DIRECT	GO:1902309~negative regulation of peptidyl-serine dephosphorylation	1	0.135501	1	PPP1R16B	681	3	19734	9.65932	1	1	1
GOTERM_BP_DIRECT	GO:0014049~positive regulation of glutamate secretion	1	0.135501	1	AVPR1A	681	7	19734	4.13971	1	1	1
GOTERM_BP_DIRECT	GO:0002491~antigen processing and presentation of endogenous peptide antigen via MHC class II	1	0.135501	1	HLA-DRB1	681	2	19734	14.489	1	1	1
GOTERM_BP_DIRECT	GO:2000821~regulation of grooming behavior	1	0.135501	1	SHANK3	681	6	19734	4.82966	1	1	1
GOTERM_BP_DIRECT	GO:0071313~cellular response to caffeine	1	0.135501	1	TMEM38A	681	11	19734	2.63436	1	1	1
GOTERM_BP_DIRECT	GO:0033028~myeloid cell apoptotic process	1	0.135501	1	BCL2	681	9	19734	3.21977	1	1	1
GOTERM_BP_DIRECT	GO:0060586~multicellular organismal-level iron ion homeostasis	1	0.135501	1	SLC40A1	681	26	19734	1.11454	1	1	1
GOTERM_BP_DIRECT	GO:0032769~negative regulation of monooxygenase activity	1	0.135501	1	SNCA	681	4	19734	7.24449	1	1	1
GOTERM_BP_DIRECT	GO:0098534~centriole assembly	1	0.135501	1	CCDC61	681	7	19734	4.13971	1	1	1
GOTERM_BP_DIRECT	GO:0050775~positive regulation of dendrite morphogenesis	1	0.135501	1	IL1RAPL1	681	20	19734	1.4489	1	1	1
GOTERM_BP_DIRECT	GO:0007168~receptor guanylyl cyclase signaling pathway	1	0.135501	1	GUCY2C	681	11	19734	2.63436	1	1	1
GOTERM_BP_DIRECT	GO:0021842~chemorepulsion involved in interneuron migration from the subpallium to the cortex	1	0.135501	1	NRG3	681	1	19734	28.978	1	1	1
GOTERM_BP_DIRECT	GO:2000178~negative regulation of neural precursor cell proliferation	1	0.135501	1	PDE9A	681	12	19734	2.41483	1	1	1
GOTERM_BP_DIRECT	GO:0001835~blastocyst hatching	1	0.135501	1	ST8SIA6	681	26	19734	1.11454	1	1	1
GOTERM_BP_DIRECT	GO:2000781~positive regulation of double-strand break repair	1	0.135501	1	BCL7A	681	43	19734	0.673906	1	1	1
GOTERM_BP_DIRECT	GO:0003138~primary heart field specification	1	0.135501	1	MEF2C	681	3	19734	9.65932	1	1	1
GOTERM_BP_DIRECT	GO:0032693~negative regulation of interleukin-10 production	1	0.135501	1	TNFRSF21	681	24	19734	1.20742	1	1	1
GOTERM_BP_DIRECT	GO:0034620~cellular response to unfolded protein	1	0.135501	1	HSPA1A	681	18	19734	1.60989	1	1	1
GOTERM_BP_DIRECT	GO:0008152~metabolic process	1	0.135501	1	LYZ	681	14	19734	2.06986	1	1	1
GOTERM_BP_DIRECT	GO:0090370~negative regulation of cholesterol efflux	1	0.135501	1	EGF	681	23	19734	1.25991	1	1	1
GOTERM_BP_DIRECT	GO:0035790~platelet-derived growth factor receptor-alpha signaling pathway	1	0.135501	1	PDGFA	681	2	19734	14.489	1	1	1
GOTERM_BP_DIRECT	GO:0072531~pyrimidine-containing compound transmembrane transport	1	0.135501	1	SLC28A3	681	6	19734	4.82966	1	1	1
GOTERM_BP_DIRECT	GO:0070231~T cell apoptotic process	1	0.135501	1	BCL2	681	12	19734	2.41483	1	1	1
GOTERM_BP_DIRECT	GO:0072092~ureteric bud invasion	1	0.135501	1	KIF26B	681	3	19734	9.65932	1	1	1
GOTERM_BP_DIRECT	GO:0035635~entry of bacterium into host cell	1	0.135501	1	SRC	681	2	19734	14.489	1	1	1
GOTERM_BP_DIRECT	GO:0045652~regulation of megakaryocyte differentiation	1	0.135501	1	MEF2C	681	8	19734	3.62225	1	1	1
GOTERM_BP_DIRECT	GO:0072574~hepatocyte proliferation	1	0.135501	1	IL6	681	10	19734	2.8978	1	1	1
GOTERM_BP_DIRECT	GO:0045986~negative regulation of smooth muscle contraction	1	0.135501	1	PTGS2	681	3	19734	9.65932	1	1	1
GOTERM_BP_DIRECT	GO:0097744~renal urate salt excretion	1	0.135501	1	SLC22A12	681	3	19734	9.65932	1	1	1
GOTERM_BP_DIRECT	GO:0032825~positive regulation of natural killer cell differentiation	1	0.135501	1	IL15	681	9	19734	3.21977	1	1	1
GOTERM_BP_DIRECT	GO:0048873~homeostasis of number of cells within a tissue	1	0.135501	1	BCL2	681	34	19734	0.852293	1	1	1
GOTERM_BP_DIRECT	GO:0032534~regulation of microvillus assembly	1	0.135501	1	KLF5	681	5	19734	5.79559	1	1	1
GOTERM_BP_DIRECT	GO:0002125~maternal aggressive behavior	1	0.135501	1	AVPR1A	681	3	19734	9.65932	1	1	1
GOTERM_BP_DIRECT	GO:0048489~synaptic vesicle transport	1	0.135501	1	SNCA	681	15	19734	1.93186	1	1	1
GOTERM_BP_DIRECT	GO:0061572~actin filament bundle organization	1	0.135501	1	RFLNB	681	4	19734	7.24449	1	1	1
GOTERM_BP_DIRECT	GO:0034614~cellular response to reactive oxygen species	1	0.135501	1	MMP9	681	53	19734	0.546754	1	1	1
GOTERM_BP_DIRECT	GO:0009749~response to glucose	1	0.135501	1	SLC30A8	681	62	19734	0.467387	1	1	1
GOTERM_BP_DIRECT	GO:0016321~female meiosis chromosome segregation	1	0.135501	1	MEIKIN	681	4	19734	7.24449	1	1	1
GOTERM_BP_DIRECT	GO:0071471~cellular response to non-ionic osmotic stress	1	0.135501	1	PTGS2	681	1	19734	28.978	1	1	1
GOTERM_BP_DIRECT	GO:0071218~cellular response to misfolded protein	1	0.135501	1	SDF2L1	681	13	19734	2.22907	1	1	1
GOTERM_BP_DIRECT	GO:0035308~negative regulation of protein dephosphorylation	1	0.135501	1	PPP1R16B	681	11	19734	2.63436	1	1	1
GOTERM_BP_DIRECT	GO:1905564~positive regulation of vascular endothelial cell proliferation	1	0.135501	1	FGFR1	681	28	19734	1.03493	1	1	1
GOTERM_BP_DIRECT	GO:0010832~negative regulation of myotube differentiation	1	0.135501	1	CEACAM5	681	16	19734	1.81112	1	1	1
GOTERM_BP_DIRECT	GO:0090385~phagosome-lysosome fusion	1	0.135501	1	RAB20	681	18	19734	1.60989	1	1	1
GOTERM_BP_DIRECT	GO:0042417~dopamine metabolic process	1	0.135501	1	SNCAIP	681	18	19734	1.60989	1	1	1
GOTERM_BP_DIRECT	GO:1900452~regulation of long-term synaptic depression	1	0.135501	1	SHANK3	681	5	19734	5.79559	1	1	1
GOTERM_BP_DIRECT	GO:1904262~negative regulation of TORC1 signaling	1	0.135501	1	RNF152	681	53	19734	0.546754	1	1	1
GOTERM_BP_DIRECT	GO:0060444~branching involved in mammary gland duct morphogenesis	1	0.135501	1	SRC	681	12	19734	2.41483	1	1	1
GOTERM_BP_DIRECT	GO:0001523~retinoid metabolic process	1	0.135501	1	AKR1C4	681	28	19734	1.03493	1	1	1
GOTERM_BP_DIRECT	GO:0010906~regulation of glucose metabolic process	1	0.135501	1	TFF3	681	23	19734	1.25991	1	1	1
GOTERM_BP_DIRECT	GO:0099152~regulation of neurotransmitter receptor transport, endosome to postsynaptic membrane	1	0.135501	1	TAMALIN	681	3	19734	9.65932	1	1	1
GOTERM_BP_DIRECT	GO:1900024~regulation of substrate adhesion-dependent cell spreading	1	0.135501	1	PTK2	681	6	19734	4.82966	1	1	1
GOTERM_BP_DIRECT	GO:1902036~regulation of hematopoietic stem cell differentiation	1	0.135501	1	OSM	681	11	19734	2.63436	1	1	1
GOTERM_BP_DIRECT	GO:0060485~mesenchyme development	1	0.135501	1	BNC2	681	6	19734	4.82966	1	1	1
GOTERM_BP_DIRECT	GO:0072166~posterior mesonephric tubule development	1	0.135501	1	WT1	681	2	19734	14.489	1	1	1
GOTERM_BP_DIRECT	GO:0048144~fibroblast proliferation	1	0.135501	1	LIF	681	39	19734	0.743025	1	1	1
GOTERM_BP_DIRECT	GO:0006611~protein export from nucleus	1	0.135501	1	CALR	681	34	19734	0.852293	1	1	1
GOTERM_BP_DIRECT	GO:0007339~binding of sperm to zona pellucida	1	0.135501	1	ACR	681	38	19734	0.762578	1	1	1
GOTERM_BP_DIRECT	GO:0060644~mammary gland epithelial cell differentiation	1	0.135501	1	HOXA5	681	13	19734	2.22907	1	1	1
GOTERM_BP_DIRECT	GO:0010193~response to ozone	1	0.135501	1	TACR1	681	5	19734	5.79559	1	1	1
GOTERM_BP_DIRECT	GO:0014723~regulation of skeletal muscle contraction by modulation of calcium ion sensitivity of myofibril	1	0.135501	1	PRKD1	681	1	19734	28.978	1	1	1
GOTERM_BP_DIRECT	GO:0014012~peripheral nervous system axon regeneration	1	0.135501	1	TSPO	681	7	19734	4.13971	1	1	1
GOTERM_BP_DIRECT	GO:0043931~ossification involved in bone maturation	1	0.135501	1	DCHS1	681	13	19734	2.22907	1	1	1
GOTERM_BP_DIRECT	GO:0006783~heme biosynthetic process	1	0.135501	1	TSPO	681	25	19734	1.15912	1	1	1
GOTERM_BP_DIRECT	GO:0014719~skeletal muscle satellite cell activation	1	0.135501	1	EPHB1	681	3	19734	9.65932	1	1	1
GOTERM_BP_DIRECT	GO:1905596~negative regulation of low-density lipoprotein particle receptor binding	1	0.135501	1	PCSK9	681	3	19734	9.65932	1	1	1
GOTERM_BP_DIRECT	GO:2000405~negative regulation of T cell migration	1	0.135501	1	CD200	681	5	19734	5.79559	1	1	1
GOTERM_BP_DIRECT	GO:0021930~cerebellar granule cell precursor proliferation	1	0.135501	1	EGF	681	9	19734	3.21977	1	1	1
GOTERM_BP_DIRECT	GO:1990349~gap junction-mediated intercellular transport	1	0.135501	1	GJB2	681	6	19734	4.82966	1	1	1
GOTERM_BP_DIRECT	GO:0048639~positive regulation of developmental growth	1	0.135501	1	PLCB1	681	4	19734	7.24449	1	1	1
GOTERM_BP_DIRECT	GO:0060999~positive regulation of dendritic spine development	1	0.135501	1	SHANK3	681	25	19734	1.15912	1	1	1
GOTERM_BP_DIRECT	GO:0140361~cyclic-GMP-AMP transmembrane import across plasma membrane	1	0.135501	1	LRRC8B	681	7	19734	4.13971	1	1	1
GOTERM_BP_DIRECT	GO:0045833~negative regulation of lipid metabolic process	1	0.135501	1	IL1B	681	5	19734	5.79559	1	1	1
GOTERM_BP_DIRECT	GO:0006939~smooth muscle contraction	1	0.135501	1	HTR7	681	22	19734	1.31718	1	1	1
GOTERM_BP_DIRECT	GO:1902269~positive regulation of polyamine transmembrane transport	1	0.135501	1	AZIN2	681	2	19734	14.489	1	1	1
GOTERM_BP_DIRECT	GO:0071529~cementum mineralization	1	0.135501	1	FGFR1	681	6	19734	4.82966	1	1	1
GOTERM_BP_DIRECT	GO:0010159~specification of animal organ position	1	0.135501	1	HOXA3	681	3	19734	9.65932	1	1	1
GOTERM_BP_DIRECT	GO:0060324~face development	1	0.135501	1	GRHL2	681	22	19734	1.31718	1	1	1
GOTERM_BP_DIRECT	GO:0046208~spermine catabolic process	1	0.135501	1	SMOX	681	2	19734	14.489	1	1	1
GOTERM_BP_DIRECT	GO:1990051~activation of protein kinase C activity	1	0.135501	1	CD86	681	5	19734	5.79559	1	1	1
GOTERM_BP_DIRECT	GO:0060559~positive regulation of calcidiol 1-monooxygenase activity	1	0.135501	1	IL1B	681	3	19734	9.65932	1	1	1
GOTERM_BP_DIRECT	GO:2000052~positive regulation of non-canonical Wnt signaling pathway	1	0.135501	1	SFRP1	681	9	19734	3.21977	1	1	1
GOTERM_BP_DIRECT	GO:0019557~L-histidine catabolic process to glutamate and formate	1	0.135501	1	FTCD	681	4	19734	7.24449	1	1	1
GOTERM_BP_DIRECT	GO:0061512~protein localization to cilium	1	0.135501	1	ROPN1B	681	38	19734	0.762578	1	1	1
GOTERM_BP_DIRECT	GO:0019229~regulation of vasoconstriction	1	0.135501	1	KCNA5	681	19	19734	1.52516	1	1	1
GOTERM_BP_DIRECT	GO:0090084~negative regulation of inclusion body assembly	1	0.135501	1	HSPA1A	681	10	19734	2.8978	1	1	1
GOTERM_BP_DIRECT	GO:1902166~negative regulation of intrinsic apoptotic signaling pathway in response to DNA damage by p53 class mediator	1	0.135501	1	BCL2	681	15	19734	1.93186	1	1	1
GOTERM_BP_DIRECT	GO:0042982~amyloid precursor protein metabolic process	1	0.135501	1	TMCC2	681	12	19734	2.41483	1	1	1
GOTERM_BP_DIRECT	GO:0090331~negative regulation of platelet aggregation	1	0.135501	1	UBASH3B	681	11	19734	2.63436	1	1	1
GOTERM_BP_DIRECT	GO:0021517~ventral spinal cord development	1	0.135501	1	GLI2	681	10	19734	2.8978	1	1	1
GOTERM_BP_DIRECT	GO:0071285~cellular response to lithium ion	1	0.135501	1	CALR	681	14	19734	2.06986	1	1	1
GOTERM_BP_DIRECT	GO:0003084~positive regulation of systemic arterial blood pressure	1	0.135501	1	AVPR1A	681	9	19734	3.21977	1	1	1
GOTERM_BP_DIRECT	GO:0090398~cellular senescence	1	0.135501	1	CALR	681	57	19734	0.508386	1	1	1
GOTERM_BP_DIRECT	GO:0007198~adenylate cyclase-inhibiting serotonin receptor signaling pathway	1	0.135501	1	HTR1F	681	7	19734	4.13971	1	1	1
GOTERM_BP_DIRECT	GO:0051660~establishment of centrosome localization	1	0.135501	1	PKHD1	681	10	19734	2.8978	1	1	1
GOTERM_BP_DIRECT	GO:0090272~negative regulation of fibroblast growth factor production	1	0.135501	1	FGFR1	681	6	19734	4.82966	1	1	1
GOTERM_BP_DIRECT	GO:2000369~regulation of clathrin-dependent endocytosis	1	0.135501	1	DNAJC6	681	11	19734	2.63436	1	1	1
GOTERM_BP_DIRECT	GO:2000300~regulation of synaptic vesicle exocytosis	1	0.135501	1	SV2B	681	33	19734	0.87812	1	1	1
GOTERM_BP_DIRECT	GO:0034505~tooth mineralization	1	0.135501	1	TSPEAR	681	3	19734	9.65932	1	1	1
GOTERM_BP_DIRECT	GO:0006777~Mo-molybdopterin cofactor biosynthetic process	1	0.135501	1	MOCS1	681	6	19734	4.82966	1	1	1
GOTERM_BP_DIRECT	GO:0050855~regulation of B cell receptor signaling pathway	1	0.135501	1	GCSAML	681	6	19734	4.82966	1	1	1
GOTERM_BP_DIRECT	GO:0048012~hepatocyte growth factor receptor signaling pathway	1	0.135501	1	HGF	681	8	19734	3.62225	1	1	1
GOTERM_BP_DIRECT	GO:0051093~negative regulation of developmental process	1	0.135501	1	MAEL	681	10	19734	2.8978	1	1	1
GOTERM_BP_DIRECT	GO:0006760~folic acid-containing compound metabolic process	1	0.135501	1	FTCD	681	4	19734	7.24449	1	1	1
GOTERM_BP_DIRECT	GO:0070091~glucagon secretion	1	0.135501	1	IL6	681	1	19734	28.978	1	1	1
GOTERM_BP_DIRECT	GO:0090080~positive regulation of MAPKKK cascade by fibroblast growth factor receptor signaling pathway	1	0.135501	1	FGFR1	681	5	19734	5.79559	1	1	1
GOTERM_BP_DIRECT	GO:0006084~acetyl-CoA metabolic process	1	0.135501	1	ACOT12	681	5	19734	5.79559	1	1	1
GOTERM_BP_DIRECT	GO:0090132~epithelium migration	1	0.135501	1	GRHL2	681	1	19734	28.978	1	1	1
GOTERM_BP_DIRECT	GO:0044091~membrane biogenesis	1	0.135501	1	ZNF750	681	3	19734	9.65932	1	1	1
GOTERM_BP_DIRECT	GO:0010430~fatty acid omega-oxidation	1	0.135501	1	CYP4F3	681	6	19734	4.82966	1	1	1
GOTERM_BP_DIRECT	GO:0038043~interleukin-5-mediated signaling pathway	1	0.135501	1	IL5	681	6	19734	4.82966	1	1	1
GOTERM_BP_DIRECT	GO:0032418~lysosome localization	1	0.135501	1	SYTL4	681	32	19734	0.905562	1	1	1
GOTERM_BP_DIRECT	GO:0035493~SNARE complex assembly	1	0.135501	1	SNCA	681	13	19734	2.22907	1	1	1
GOTERM_BP_DIRECT	GO:0032304~negative regulation of icosanoid secretion	1	0.135501	1	CYP4F3	681	2	19734	14.489	1	1	1
GOTERM_BP_DIRECT	GO:0061753~substrate localization to autophagosome	1	0.135501	1	STBD1	681	3	19734	9.65932	1	1	1
GOTERM_BP_DIRECT	GO:0010761~fibroblast migration	1	0.135501	1	PDLIM1	681	19	19734	1.52516	1	1	1
GOTERM_BP_DIRECT	GO:0035022~positive regulation of Rac protein signal transduction	1	0.135501	1	AUTS2	681	12	19734	2.41483	1	1	1
GOTERM_BP_DIRECT	GO:0060298~positive regulation of sarcomere organization	1	0.135501	1	PRKD1	681	6	19734	4.82966	1	1	1
GOTERM_BP_DIRECT	GO:0051443~positive regulation of ubiquitin-protein transferase activity	1	0.135501	1	TRIB3	681	13	19734	2.22907	1	1	1
GOTERM_BP_DIRECT	GO:0061909~autophagosome-lysosome fusion	1	0.135501	1	ZNRF1	681	12	19734	2.41483	1	1	1
GOTERM_BP_DIRECT	GO:0048505~regulation of timing of cell differentiation	1	0.135501	1	FGF9	681	4	19734	7.24449	1	1	1
GOTERM_BP_DIRECT	GO:0090063~positive regulation of microtubule nucleation	1	0.135501	1	HSPA1A	681	9	19734	3.21977	1	1	1
GOTERM_BP_DIRECT	GO:2000288~positive regulation of myoblast proliferation	1	0.135501	1	KCNA5	681	10	19734	2.8978	1	1	1
GOTERM_BP_DIRECT	GO:0071578~zinc ion import across plasma membrane	1	0.135501	1	SLC30A8	681	10	19734	2.8978	1	1	1
GOTERM_BP_DIRECT	GO:0001709~cell fate determination	1	0.135501	1	HOXA2	681	21	19734	1.3799	1	1	1
GOTERM_BP_DIRECT	GO:0036343~psychomotor behavior	1	0.135501	1	DPP4	681	5	19734	5.79559	1	1	1
GOTERM_BP_DIRECT	GO:0010960~magnesium ion homeostasis	1	0.135501	1	ANK3	681	7	19734	4.13971	1	1	1
GOTERM_BP_DIRECT	GO:0019227~neuronal action potential propagation	1	0.135501	1	CLCN1	681	10	19734	2.8978	1	1	1
GOTERM_BP_DIRECT	GO:0051895~negative regulation of focal adhesion assembly	1	0.135501	1	SRC	681	17	19734	1.70459	1	1	1
GOTERM_BP_DIRECT	GO:0061185~negative regulation of dermatome development	1	0.135501	1	SFRP2	681	1	19734	28.978	1	1	1
GOTERM_BP_DIRECT	GO:1903826~L-arginine transmembrane transport	1	0.135501	1	SLC38A4	681	15	19734	1.93186	1	1	1
GOTERM_BP_DIRECT	GO:0015675~nickel cation transport	1	0.135501	1	SLC41A2	681	2	19734	14.489	1	1	1
GOTERM_BP_DIRECT	GO:0001838~embryonic epithelial tube formation	1	0.135501	1	SHANK3	681	3	19734	9.65932	1	1	1
GOTERM_BP_DIRECT	GO:1903790~guanine nucleotide transmembrane transport	1	0.135501	1	ABCC4	681	2	19734	14.489	1	1	1
GOTERM_BP_DIRECT	GO:0018964~propylene metabolic process	1	0.135501	1	GRIN1	681	2	19734	14.489	1	1	1
GOTERM_BP_DIRECT	GO:0055010~ventricular cardiac muscle tissue morphogenesis	1	0.135501	1	FKBP1C	681	25	19734	1.15912	1	1	1
GOTERM_BP_DIRECT	GO:0071593~lymphocyte aggregation	1	0.135501	1	RAC2	681	5	19734	5.79559	1	1	1
GOTERM_BP_DIRECT	GO:0060441~epithelial tube branching involved in lung morphogenesis	1	0.135501	1	HOXA5	681	17	19734	1.70459	1	1	1
GOTERM_BP_DIRECT	GO:1902745~positive regulation of lamellipodium organization	1	0.135501	1	CARMIL1	681	2	19734	14.489	1	1	1
GOTERM_BP_DIRECT	GO:0032805~positive regulation of low-density lipoprotein particle receptor catabolic process	1	0.135501	1	PCSK9	681	3	19734	9.65932	1	1	1
GOTERM_BP_DIRECT	GO:0060764~cell-cell signaling involved in mammary gland development	1	0.135501	1	HOXA5	681	2	19734	14.489	1	1	1
GOTERM_BP_DIRECT	GO:2000541~positive regulation of protein geranylgeranylation	1	0.135501	1	MUSK	681	1	19734	28.978	1	1	1
GOTERM_BP_DIRECT	GO:0061737~leukotriene signaling pathway	1	0.135501	1	CYSLTR2	681	5	19734	5.79559	1	1	1
GOTERM_BP_DIRECT	GO:1903423~positive regulation of synaptic vesicle recycling	1	0.135501	1	DNM3	681	2	19734	14.489	1	1	1
GOTERM_BP_DIRECT	GO:2000363~positive regulation of prostaglandin-E synthase activity	1	0.135501	1	ITGAM	681	2	19734	14.489	1	1	1
GOTERM_BP_DIRECT	GO:0003051~angiotensin-mediated drinking behavior	1	0.135501	1	TACR1	681	2	19734	14.489	1	1	1
GOTERM_BP_DIRECT	GO:0042167~heme catabolic process	1	0.135501	1	ABCC1	681	11	19734	2.63436	1	1	1
GOTERM_BP_DIRECT	GO:0050771~negative regulation of axonogenesis	1	0.135501	1	EFNB3	681	11	19734	2.63436	1	1	1
GOTERM_BP_DIRECT	GO:0009582~detection of abiotic stimulus	1	0.135501	1	TACR1	681	4	19734	7.24449	1	1	1
GOTERM_BP_DIRECT	GO:0006749~glutathione metabolic process	1	0.135501	1	G6PD	681	43	19734	0.673906	1	1	1
GOTERM_BP_DIRECT	GO:0048014~Tie signaling pathway	1	0.135501	1	ANGPT1	681	4	19734	7.24449	1	1	1
GOTERM_BP_DIRECT	GO:0021784~postganglionic parasympathetic fiber development	1	0.135501	1	PLXNA4	681	2	19734	14.489	1	1	1
GOTERM_BP_DIRECT	GO:0098885~modification of postsynaptic actin cytoskeleton	1	0.135501	1	ITPKA	681	6	19734	4.82966	1	1	1
GOTERM_BP_DIRECT	GO:0090648~response to environmental enrichment	1	0.135501	1	ALK	681	1	19734	28.978	1	1	1
GOTERM_BP_DIRECT	GO:0060384~innervation	1	0.135501	1	POU4F1	681	17	19734	1.70459	1	1	1
GOTERM_BP_DIRECT	GO:1990034~calcium ion export across plasma membrane	1	0.135501	1	ATP2B1	681	5	19734	5.79559	1	1	1
GOTERM_BP_DIRECT	GO:0007341~penetration of zona pellucida	1	0.135501	1	ACR	681	10	19734	2.8978	1	1	1
GOTERM_BP_DIRECT	GO:0010596~negative regulation of endothelial cell migration	1	0.135501	1	PTPRM	681	24	19734	1.20742	1	1	1
GOTERM_BP_DIRECT	GO:0015825~L-serine transport	1	0.135501	1	SLC7A10	681	9	19734	3.21977	1	1	1
GOTERM_BP_DIRECT	GO:0042494~detection of bacterial lipoprotein	1	0.135501	1	SSC5D	681	1	19734	28.978	1	1	1
GOTERM_BP_DIRECT	GO:2000360~negative regulation of binding of sperm to zona pellucida	1	0.135501	1	ASTL	681	4	19734	7.24449	1	1	1
GOTERM_BP_DIRECT	GO:2000651~positive regulation of sodium ion transmembrane transporter activity	1	0.135501	1	ANK3	681	4	19734	7.24449	1	1	1
GOTERM_BP_DIRECT	GO:0048593~camera-type eye morphogenesis	1	0.135501	1	EPHB1	681	20	19734	1.4489	1	1	1
GOTERM_BP_DIRECT	GO:0045345~positive regulation of MHC class I biosynthetic process	1	0.135501	1	CIITA	681	6	19734	4.82966	1	1	1
GOTERM_BP_DIRECT	GO:0010667~negative regulation of cardiac muscle cell apoptotic process	1	0.135501	1	SFRP2	681	36	19734	0.804944	1	1	1
GOTERM_BP_DIRECT	GO:0009101~glycoprotein biosynthetic process	1	0.135501	1	GAL3ST2	681	11	19734	2.63436	1	1	1
GOTERM_BP_DIRECT	GO:0010332~response to gamma radiation	1	0.135501	1	BCL2	681	27	19734	1.07326	1	1	1
GOTERM_BP_DIRECT	GO:0006163~purine nucleotide metabolic process	1	0.135501	1	FHIT	681	4	19734	7.24449	1	1	1
GOTERM_BP_DIRECT	GO:0002084~protein depalmitoylation	1	0.135501	1	ABHD17C	681	8	19734	3.62225	1	1	1
GOTERM_BP_DIRECT	GO:0044597~daunorubicin metabolic process	1	0.135501	1	AKR1C4	681	9	19734	3.21977	1	1	1
GOTERM_BP_DIRECT	GO:0070316~regulation of G0 to G1 transition	1	0.135501	1	BCL7A	681	25	19734	1.15912	1	1	1
GOTERM_BP_DIRECT	GO:0097105~presynaptic membrane assembly	1	0.135501	1	IL1RAPL1	681	13	19734	2.22907	1	1	1
GOTERM_BP_DIRECT	GO:0048645~animal organ formation	1	0.135501	1	HOXA3	681	5	19734	5.79559	1	1	1
GOTERM_BP_DIRECT	GO:0021983~pituitary gland development	1	0.135501	1	GLI2	681	25	19734	1.15912	1	1	1
GOTERM_BP_DIRECT	GO:0001947~heart looping	1	0.135501	1	MEF2C	681	71	19734	0.40814	1	1	1
GOTERM_BP_DIRECT	GO:0002326~B cell lineage commitment	1	0.135501	1	BCL2	681	5	19734	5.79559	1	1	1
GOTERM_BP_DIRECT	GO:0014850~response to muscle activity	1	0.135501	1	METRNL	681	25	19734	1.15912	1	1	1
GOTERM_BP_DIRECT	GO:0043278~response to morphine	1	0.135501	1	PRKCE	681	10	19734	2.8978	1	1	1
GOTERM_BP_DIRECT	GO:0002415~immunoglobulin transcytosis in epithelial cells mediated by polymeric immunoglobulin receptor	1	0.135501	1	RAB17	681	2	19734	14.489	1	1	1
GOTERM_BP_DIRECT	GO:0009812~flavonoid metabolic process	1	0.135501	1	SULT1B1	681	7	19734	4.13971	1	1	1
GOTERM_BP_DIRECT	GO:0072656~maintenance of protein location in mitochondrion	1	0.135501	1	TSPO	681	6	19734	4.82966	1	1	1
GOTERM_BP_DIRECT	GO:0014908~myotube differentiation involved in skeletal muscle regeneration	1	0.135501	1	KLF5	681	4	19734	7.24449	1	1	1
GOTERM_BP_DIRECT	GO:0050965~detection of temperature stimulus involved in sensory perception of pain	1	0.135501	1	EPHB1	681	20	19734	1.4489	1	1	1
GOTERM_BP_DIRECT	GO:0048665~neuron fate specification	1	0.135501	1	POU4F1	681	22	19734	1.31718	1	1	1
GOTERM_BP_DIRECT	GO:0120116~glucagon processing	1	0.135501	1	DPP4	681	1	19734	28.978	1	1	1
GOTERM_BP_DIRECT	GO:0006754~ATP biosynthetic process	1	0.135501	1	PRKAG2	681	16	19734	1.81112	1	1	1
GOTERM_BP_DIRECT	GO:0048524~positive regulation of viral process	1	0.135501	1	STOM	681	3	19734	9.65932	1	1	1
GOTERM_BP_DIRECT	GO:2000987~positive regulation of behavioral fear response	1	0.135501	1	MEF2C	681	7	19734	4.13971	1	1	1
GOTERM_BP_DIRECT	GO:0048753~pigment granule organization	1	0.135501	1	BCL2	681	1	19734	28.978	1	1	1
GOTERM_BP_DIRECT	GO:0006576~biogenic amine metabolic process	1	0.135501	1	SULT1B1	681	3	19734	9.65932	1	1	1
GOTERM_BP_DIRECT	GO:2000738~positive regulation of stem cell differentiation	1	0.135501	1	TACSTD2	681	12	19734	2.41483	1	1	1
GOTERM_BP_DIRECT	GO:0051451~myoblast migration	1	0.135501	1	THBS4	681	10	19734	2.8978	1	1	1
GOTERM_BP_DIRECT	GO:0045773~positive regulation of axon extension	1	0.135501	1	SEMA7A	681	33	19734	0.87812	1	1	1
GOTERM_BP_DIRECT	GO:0043588~skin development	1	0.135501	1	PDGFA	681	39	19734	0.743025	1	1	1
GOTERM_BP_DIRECT	GO:2001016~positive regulation of skeletal muscle cell differentiation	1	0.135501	1	MEF2C	681	4	19734	7.24449	1	1	1
GOTERM_BP_DIRECT	GO:0097212~lysosomal membrane organization	1	0.135501	1	ATP10B	681	1	19734	28.978	1	1	1
GOTERM_BP_DIRECT	GO:0001712~ectodermal cell fate commitment	1	0.135501	1	ETS2	681	1	19734	28.978	1	1	1
GOTERM_BP_DIRECT	GO:0070858~negative regulation of bile acid biosynthetic process	1	0.135501	1	MALRD1	681	4	19734	7.24449	1	1	1
GOTERM_BP_DIRECT	GO:0090102~cochlea development	1	0.135501	1	DCHS1	681	31	19734	0.934773	1	1	1
GOTERM_BP_DIRECT	GO:0033387~putrescine biosynthetic process from ornithine	1	0.135501	1	AZIN2	681	3	19734	9.65932	1	1	1
GOTERM_BP_DIRECT	GO:0060087~relaxation of vascular associated smooth muscle	1	0.135501	1	GUCY1A1	681	6	19734	4.82966	1	1	1
GOTERM_BP_DIRECT	GO:0060253~negative regulation of glial cell proliferation	1	0.135501	1	TSPO	681	9	19734	3.21977	1	1	1
GOTERM_BP_DIRECT	GO:0003014~renal system process	1	0.135501	1	BCL2	681	13	19734	2.22907	1	1	1
GOTERM_BP_DIRECT	GO:0090280~positive regulation of calcium ion import	1	0.135501	1	ATP2C2	681	16	19734	1.81112	1	1	1
GOTERM_BP_DIRECT	GO:0060236~regulation of mitotic spindle organization	1	0.135501	1	GNAI1	681	21	19734	1.3799	1	1	1
GOTERM_BP_DIRECT	GO:0062043~positive regulation of cardiac epithelial to mesenchymal transition	1	0.135501	1	ACVR1	681	4	19734	7.24449	1	1	1
GOTERM_BP_DIRECT	GO:0048050~post-embryonic eye morphogenesis	1	0.135501	1	MFAP2	681	4	19734	7.24449	1	1	1
GOTERM_BP_DIRECT	GO:0001971~negative regulation of activation of membrane attack complex	1	0.135501	1	CD59	681	3	19734	9.65932	1	1	1
GOTERM_BP_DIRECT	GO:0036135~Schwann cell migration	1	0.135501	1	RRAS2	681	3	19734	9.65932	1	1	1
GOTERM_BP_DIRECT	GO:0001545~primary ovarian follicle growth	1	0.135501	1	SRC	681	1	19734	28.978	1	1	1
GOTERM_BP_DIRECT	GO:0002764~immune response-regulating signaling pathway	1	0.135501	1	VSTM1	681	38	19734	0.762578	1	1	1
GOTERM_BP_DIRECT	GO:0045604~regulation of epidermal cell differentiation	1	0.135501	1	MAFF	681	4	19734	7.24449	1	1	1
GOTERM_BP_DIRECT	GO:1904026~regulation of collagen fibril organization	1	0.135501	1	AEBP1	681	3	19734	9.65932	1	1	1
GOTERM_BP_DIRECT	GO:0044793~negative regulation by host of viral process	1	0.135501	1	LTF	681	2	19734	14.489	1	1	1
GOTERM_BP_DIRECT	GO:2001239~regulation of extrinsic apoptotic signaling pathway in absence of ligand	1	0.135501	1	FGFR1	681	1	19734	28.978	1	1	1
GOTERM_BP_DIRECT	GO:0060345~spleen trabecula formation	1	0.135501	1	SLC40A1	681	1	19734	28.978	1	1	1
GOTERM_BP_DIRECT	GO:0070458~cellular detoxification of nitrogen compound	1	0.135501	1	MTARC1	681	5	19734	5.79559	1	1	1
GOTERM_BP_DIRECT	GO:0071421~manganese ion transmembrane transport	1	0.135501	1	ATP2C2	681	9	19734	3.21977	1	1	1
GOTERM_BP_DIRECT	GO:0032787~monocarboxylic acid metabolic process	1	0.135501	1	GLYAT	681	3	19734	9.65932	1	1	1
GOTERM_BP_DIRECT	GO:0035855~megakaryocyte development	1	0.135501	1	MEIS1	681	23	19734	1.25991	1	1	1
GOTERM_BP_DIRECT	GO:0036309~protein localization to M-band	1	0.135501	1	OBSCN	681	2	19734	14.489	1	1	1
GOTERM_BP_DIRECT	GO:1901223~negative regulation of non-canonical NF-kappaB signal transduction	1	0.135501	1	TRIM15	681	47	19734	0.616553	1	1	1
GOTERM_BP_DIRECT	GO:0046902~regulation of mitochondrial membrane permeability	1	0.135501	1	BCL2	681	12	19734	2.41483	1	1	1
GOTERM_BP_DIRECT	GO:0046580~negative regulation of Ras protein signal transduction	1	0.135501	1	RASAL1	681	25	19734	1.15912	1	1	1
GOTERM_BP_DIRECT	GO:0018107~peptidyl-threonine phosphorylation	1	0.135501	1	PRKD1	681	55	19734	0.526872	1	1	1
GOTERM_BP_DIRECT	GO:0140467~integrated stress response signaling	1	0.135501	1	CEBPE	681	24	19734	1.20742	1	1	1
GOTERM_BP_DIRECT	GO:0006112~energy reserve metabolic process	1	0.135501	1	GFPT2	681	16	19734	1.81112	1	1	1
GOTERM_BP_DIRECT	GO:2000271~positive regulation of fibroblast apoptotic process	1	0.135501	1	SFRP1	681	11	19734	2.63436	1	1	1
GOTERM_BP_DIRECT	GO:0048170~positive regulation of long-term neuronal synaptic plasticity	1	0.135501	1	SHANK3	681	11	19734	2.63436	1	1	1
GOTERM_BP_DIRECT	GO:0010041~response to iron(III) ion	1	0.135501	1	G6PD	681	3	19734	9.65932	1	1	1
GOTERM_BP_DIRECT	GO:0070431~nucleotide-binding oligomerization domain containing 2 signaling pathway	1	0.135501	1	INAVA	681	10	19734	2.8978	1	1	1
GOTERM_BP_DIRECT	GO:0071329~cellular response to sucrose stimulus	1	0.135501	1	CALCRL	681	1	19734	28.978	1	1	1
GOTERM_BP_DIRECT	GO:1990401~embryonic lung development	1	0.135501	1	PDGFA	681	2	19734	14.489	1	1	1
GOTERM_BP_DIRECT	GO:0048644~muscle organ morphogenesis	1	0.135501	1	LIF	681	8	19734	3.62225	1	1	1
GOTERM_BP_DIRECT	GO:2000564~regulation of CD8-positive, alpha-beta T cell proliferation	1	0.135501	1	SH3RF1	681	3	19734	9.65932	1	1	1
GOTERM_BP_DIRECT	GO:0061817~endoplasmic reticulum-plasma membrane tethering	1	0.135501	1	ESYT3	681	6	19734	4.82966	1	1	1
GOTERM_BP_DIRECT	GO:1904383~response to sodium phosphate	1	0.135501	1	FGFR1	681	9	19734	3.21977	1	1	1
GOTERM_BP_DIRECT	GO:0044752~response to human chorionic gonadotropin	1	0.135501	1	GJB2	681	3	19734	9.65932	1	1	1
GOTERM_BP_DIRECT	GO:1901750~leukotriene D4 biosynthetic process	1	0.135501	1	GGTA1	681	10	19734	2.8978	1	1	1
GOTERM_BP_DIRECT	GO:2001238~positive regulation of extrinsic apoptotic signaling pathway	1	0.135501	1	WWOX	681	30	19734	0.965932	1	1	1
GOTERM_BP_DIRECT	GO:0045616~regulation of keratinocyte differentiation	1	0.135501	1	CD109	681	13	19734	2.22907	1	1	1
GOTERM_BP_DIRECT	GO:1903997~positive regulation of non-membrane spanning protein tyrosine kinase activity	1	0.135501	1	SRC	681	1	19734	28.978	1	1	1
GOTERM_BP_DIRECT	GO:1905430~cellular response to glycine	1	0.135501	1	FYN	681	3	19734	9.65932	1	1	1
GOTERM_BP_DIRECT	GO:0060349~bone morphogenesis	1	0.135501	1	LTF	681	29	19734	0.99924	1	1	1
GOTERM_BP_DIRECT	GO:0045746~negative regulation of Notch signaling pathway	1	0.135501	1	EGFL7	681	42	19734	0.689952	1	1	1
GOTERM_BP_DIRECT	GO:2000270~negative regulation of fibroblast apoptotic process	1	0.135501	1	SFRP1	681	8	19734	3.62225	1	1	1
GOTERM_BP_DIRECT	GO:2000318~positive regulation of T-helper 17 type immune response	1	0.135501	1	PRKCQ	681	13	19734	2.22907	1	1	1
GOTERM_BP_DIRECT	GO:0042659~regulation of cell fate specification	1	0.135501	1	DPEP3	681	14	19734	2.06986	1	1	1
GOTERM_BP_DIRECT	GO:0038135~ERBB2-ERBB4 signaling pathway	1	0.135501	1	HBEGF	681	5	19734	5.79559	1	1	1
GOTERM_BP_DIRECT	GO:0070164~negative regulation of adiponectin secretion	1	0.135501	1	IL1B	681	4	19734	7.24449	1	1	1
GOTERM_BP_DIRECT	GO:0006171~cAMP biosynthetic process	1	0.135501	1	ADCY6	681	10	19734	2.8978	1	1	1
GOTERM_BP_DIRECT	GO:0048842~positive regulation of axon extension involved in axon guidance	1	0.135501	1	SEMA5A	681	7	19734	4.13971	1	1	1
GOTERM_BP_DIRECT	GO:1905522~negative regulation of macrophage migration	1	0.135501	1	CD200	681	7	19734	4.13971	1	1	1
GOTERM_BP_DIRECT	GO:0072675~osteoclast fusion	1	0.135501	1	CD109	681	6	19734	4.82966	1	1	1
GOTERM_BP_DIRECT	GO:0150074~positive regulation of protein-glutamine gamma-glutamyltransferase activity	1	0.135501	1	CD200	681	2	19734	14.489	1	1	1
GOTERM_BP_DIRECT	GO:0032696~negative regulation of interleukin-13 production	1	0.135501	1	TNFRSF21	681	7	19734	4.13971	1	1	1
GOTERM_BP_DIRECT	GO:0072672~neutrophil extravasation	1	0.135501	1	PRTN3	681	6	19734	4.82966	1	1	1
GOTERM_BP_DIRECT	GO:1905867~epididymis development	1	0.135501	1	GJB2	681	5	19734	5.79559	1	1	1
GOTERM_BP_DIRECT	GO:0008272~sulfate transport	1	0.135501	1	SLC26A8	681	12	19734	2.41483	1	1	1
GOTERM_BP_DIRECT	GO:0046836~glycolipid transport	1	0.135501	1	PLTP	681	5	19734	5.79559	1	1	1
GOTERM_BP_DIRECT	GO:0010717~regulation of epithelial to mesenchymal transition	1	0.135501	1	PHLDB1	681	15	19734	1.93186	1	1	1
GOTERM_BP_DIRECT	GO:0034315~regulation of Arp2/3 complex-mediated actin nucleation	1	0.135501	1	CARMIL1	681	25	19734	1.15912	1	1	1
GOTERM_BP_DIRECT	GO:0071709~membrane assembly	1	0.135501	1	ANK3	681	4	19734	7.24449	1	1	1
GOTERM_BP_DIRECT	GO:0008610~lipid biosynthetic process	1	0.135501	1	OLAH	681	17	19734	1.70459	1	1	1
GOTERM_BP_DIRECT	GO:1904377~positive regulation of protein localization to cell periphery	1	0.135501	1	SNCA	681	5	19734	5.79559	1	1	1
GOTERM_BP_DIRECT	GO:0071372~cellular response to follicle-stimulating hormone stimulus	1	0.135501	1	EFNA5	681	10	19734	2.8978	1	1	1
GOTERM_BP_DIRECT	GO:0023051~regulation of signaling	1	0.135501	1	OSM	681	10	19734	2.8978	1	1	1
GOTERM_BP_DIRECT	GO:0048757~pigment granule maturation	1	0.135501	1	CD63	681	1	19734	28.978	1	1	1
GOTERM_BP_DIRECT	GO:0098884~postsynaptic neurotransmitter receptor internalization	1	0.135501	1	DNM3	681	8	19734	3.62225	1	1	1
GOTERM_BP_DIRECT	GO:0061182~negative regulation of chondrocyte development	1	0.135501	1	RFLNB	681	4	19734	7.24449	1	1	1
GOTERM_BP_DIRECT	GO:0060032~notochord regression	1	0.135501	1	GLI2	681	2	19734	14.489	1	1	1
GOTERM_BP_DIRECT	GO:0048839~inner ear development	1	0.135501	1	GJB2	681	48	19734	0.603708	1	1	1
GOTERM_BP_DIRECT	GO:1901953~positive regulation of anterograde dense core granule transport	1	0.135501	1	TRIM46	681	3	19734	9.65932	1	1	1
GOTERM_BP_DIRECT	GO:0060402~calcium ion transport into cytosol	1	0.135501	1	BCL2	681	13	19734	2.22907	1	1	1
GOTERM_BP_DIRECT	GO:0021631~optic nerve morphogenesis	1	0.135501	1	EPHB1	681	5	19734	5.79559	1	1	1
GOTERM_BP_DIRECT	GO:0046898~response to cycloheximide	1	0.135501	1	CDA	681	3	19734	9.65932	1	1	1
GOTERM_BP_DIRECT	GO:0050658~RNA transport	1	0.135501	1	RBFOX1	681	11	19734	2.63436	1	1	1
GOTERM_BP_DIRECT	GO:0070935~3'-UTR-mediated mRNA stabilization	1	0.135501	1	BOLL	681	21	19734	1.3799	1	1	1
GOTERM_BP_DIRECT	GO:1902490~regulation of sperm capacitation	1	0.135501	1	TCP11	681	5	19734	5.79559	1	1	1
GOTERM_BP_DIRECT	GO:0030208~dermatan sulfate biosynthetic process	1	0.135501	1	UST	681	5	19734	5.79559	1	1	1
GOTERM_BP_DIRECT	GO:2001288~positive regulation of caveolin-mediated endocytosis	1	0.135501	1	CAV3	681	3	19734	9.65932	1	1	1
GOTERM_BP_DIRECT	GO:0160075~non-canonical inflammasome complex assembly	1	0.135501	1	NR4A1	681	3	19734	9.65932	1	1	1
GOTERM_BP_DIRECT	GO:0046037~GMP metabolic process	1	0.135501	1	CARD11	681	11	19734	2.63436	1	1	1
GOTERM_BP_DIRECT	GO:0048387~negative regulation of retinoic acid receptor signaling pathway	1	0.135501	1	CALR	681	9	19734	3.21977	1	1	1
GOTERM_BP_DIRECT	GO:0072075~metanephric mesenchyme development	1	0.135501	1	WT1	681	7	19734	4.13971	1	1	1
GOTERM_BP_DIRECT	GO:0051248~negative regulation of protein metabolic process	1	0.135501	1	GBA1	681	10	19734	2.8978	1	1	1
GOTERM_BP_DIRECT	GO:0090030~regulation of steroid hormone biosynthetic process	1	0.135501	1	LHCGR	681	1	19734	28.978	1	1	1
GOTERM_BP_DIRECT	GO:1902380~positive regulation of endoribonuclease activity	1	0.135501	1	HSPA1A	681	1	19734	28.978	1	1	1
GOTERM_BP_DIRECT	GO:0002024~diet induced thermogenesis	1	0.135501	1	SCT	681	13	19734	2.22907	1	1	1
GOTERM_BP_DIRECT	GO:0006936~muscle contraction	1	0.135501	1	CLCN1	681	85	19734	0.340917	1	1	1
GOTERM_BP_DIRECT	GO:0140013~meiotic nuclear division	1	0.135501	1	LIF	681	4	19734	7.24449	1	1	1
GOTERM_BP_DIRECT	GO:0060487~lung epithelial cell differentiation	1	0.135501	1	GRHL2	681	9	19734	3.21977	1	1	1
GOTERM_BP_DIRECT	GO:0090187~positive regulation of pancreatic juice secretion	1	0.135501	1	SCT	681	3	19734	9.65932	1	1	1
GOTERM_BP_DIRECT	GO:0032060~bleb assembly	1	0.135501	1	LPAR3	681	10	19734	2.8978	1	1	1
GOTERM_BP_DIRECT	GO:0045651~positive regulation of macrophage differentiation	1	0.135501	1	LIF	681	16	19734	1.81112	1	1	1
GOTERM_BP_DIRECT	GO:1901164~negative regulation of trophoblast cell migration	1	0.135501	1	CALR	681	8	19734	3.62225	1	1	1
GOTERM_BP_DIRECT	GO:2001269~positive regulation of cysteine-type endopeptidase activity involved in apoptotic signaling pathway	1	0.135501	1	ST18	681	6	19734	4.82966	1	1	1
GOTERM_BP_DIRECT	GO:0033092~positive regulation of immature T cell proliferation in thymus	1	0.135501	1	IL1B	681	6	19734	4.82966	1	1	1
GOTERM_BP_DIRECT	GO:0045606~positive regulation of epidermal cell differentiation	1	0.135501	1	SULT2B1	681	8	19734	3.62225	1	1	1
GOTERM_BP_DIRECT	GO:0034625~fatty acid elongation, monounsaturated fatty acid	1	0.135501	1	ELOVL3	681	7	19734	4.13971	1	1	1
GOTERM_BP_DIRECT	GO:0007043~cell-cell junction assembly	1	0.135501	1	CDH24	681	52	19734	0.557269	1	1	1
GOTERM_BP_DIRECT	GO:0071482~cellular response to light stimulus	1	0.135501	1	GPR52	681	21	19734	1.3799	1	1	1
GOTERM_BP_DIRECT	GO:2001044~regulation of integrin-mediated signaling pathway	1	0.135501	1	PRKD1	681	5	19734	5.79559	1	1	1
GOTERM_BP_DIRECT	GO:0007221~positive regulation of transcription of Notch receptor target	1	0.135501	1	MAML3	681	8	19734	3.62225	1	1	1
GOTERM_BP_DIRECT	GO:0046328~regulation of JNK cascade	1	0.135501	1	EPHB1	681	16	19734	1.81112	1	1	1
GOTERM_BP_DIRECT	GO:0003198~epithelial to mesenchymal transition involved in endocardial cushion formation	1	0.135501	1	SNAI1	681	12	19734	2.41483	1	1	1
GOTERM_BP_DIRECT	GO:0001836~release of cytochrome c from mitochondria	1	0.135501	1	BCL2	681	25	19734	1.15912	1	1	1
GOTERM_BP_DIRECT	GO:0043030~regulation of macrophage activation	1	0.135501	1	SNCA	681	13	19734	2.22907	1	1	1
GOTERM_BP_DIRECT	GO:0097028~dendritic cell differentiation	1	0.135501	1	FLT3	681	13	19734	2.22907	1	1	1
GOTERM_BP_DIRECT	GO:0042117~monocyte activation	1	0.135501	1	AZU1	681	9	19734	3.21977	1	1	1
GOTERM_BP_DIRECT	GO:0007387~anterior compartment pattern formation	1	0.135501	1	PBX3	681	1	19734	28.978	1	1	1
GOTERM_BP_DIRECT	GO:0071333~cellular response to glucose stimulus	1	0.135501	1	SLC12A7	681	79	19734	0.36681	1	1	1
GOTERM_BP_DIRECT	GO:0071504~cellular response to heparin	1	0.135501	1	SFRP1	681	4	19734	7.24449	1	1	1
GOTERM_BP_DIRECT	GO:0106402~Lewis x epitope biosynthetic process	1	0.135501	1	FUT4	681	2	19734	14.489	1	1	1
GOTERM_BP_DIRECT	GO:0071417~cellular response to organonitrogen compound	1	0.135501	1	CAV3	681	5	19734	5.79559	1	1	1
GOTERM_BP_DIRECT	GO:0019370~leukotriene biosynthetic process	1	0.135501	1	ALOX5AP	681	11	19734	2.63436	1	1	1
GOTERM_BP_DIRECT	GO:0071360~cellular response to exogenous dsRNA	1	0.135501	1	CIITA	681	18	19734	1.60989	1	1	1
GOTERM_BP_DIRECT	GO:0051153~regulation of striated muscle cell differentiation	1	0.135501	1	HDAC9	681	1	19734	28.978	1	1	1
GOTERM_BP_DIRECT	GO:0042832~defense response to protozoan	1	0.135501	1	NKG7	681	28	19734	1.03493	1	1	1
GOTERM_BP_DIRECT	GO:0046321~positive regulation of fatty acid oxidation	1	0.135501	1	KLHL25	681	6	19734	4.82966	1	1	1
GOTERM_BP_DIRECT	GO:0010498~proteasomal protein catabolic process	1	0.135501	1	DDI1	681	30	19734	0.965932	1	1	1
GOTERM_BP_DIRECT	GO:0033599~regulation of mammary gland epithelial cell proliferation	1	0.135501	1	HOXA5	681	5	19734	5.79559	1	1	1
GOTERM_BP_DIRECT	GO:0043583~ear development	1	0.135501	1	BCL2	681	10	19734	2.8978	1	1	1
GOTERM_BP_DIRECT	GO:2000391~positive regulation of neutrophil extravasation	1	0.135501	1	XG	681	8	19734	3.62225	1	1	1
GOTERM_BP_DIRECT	GO:0099557~trans-synaptic signaling by trans-synaptic complex, modulating synaptic transmission	1	0.135501	1	EFNB3	681	2	19734	14.489	1	1	1
GOTERM_BP_DIRECT	GO:0008366~axon ensheathment	1	0.135501	1	PLP1	681	6	19734	4.82966	1	1	1
GOTERM_BP_DIRECT	GO:0042088~T-helper 1 type immune response	1	0.135501	1	HLA-DRB1	681	9	19734	3.21977	1	1	1
GOTERM_BP_DIRECT	GO:0045069~regulation of viral genome replication	1	0.135501	1	BCL2	681	3	19734	9.65932	1	1	1
GOTERM_BP_DIRECT	GO:0042775~mitochondrial ATP synthesis coupled electron transport	1	0.135501	1	SNCA	681	10	19734	2.8978	1	1	1
GOTERM_BP_DIRECT	GO:0071639~positive regulation of monocyte chemotactic protein-1 production	1	0.135501	1	IL1B	681	15	19734	1.93186	1	1	1
GOTERM_BP_DIRECT	GO:0009893~positive regulation of metabolic process	1	0.135501	1	ACVR1	681	9	19734	3.21977	1	1	1
GOTERM_BP_DIRECT	GO:0007017~microtubule-based process	1	0.135501	1	KIFC3	681	26	19734	1.11454	1	1	1
GOTERM_BP_DIRECT	GO:0014816~skeletal muscle satellite cell differentiation	1	0.135501	1	KLF5	681	7	19734	4.13971	1	1	1
GOTERM_BP_DIRECT	GO:0030238~male sex determination	1	0.135501	1	FGF9	681	11	19734	2.63436	1	1	1
GOTERM_BP_DIRECT	GO:0032597~B cell receptor transport into membrane raft	1	0.135501	1	CD24	681	1	19734	28.978	1	1	1
GOTERM_BP_DIRECT	GO:0030388~fructose 1,6-bisphosphate metabolic process	1	0.135501	1	ALDOC	681	8	19734	3.62225	1	1	1
GOTERM_BP_DIRECT	GO:0002149~hypochlorous acid biosynthetic process	1	0.135501	1	MPO	681	1	19734	28.978	1	1	1
GOTERM_BP_DIRECT	GO:0033120~positive regulation of RNA splicing	1	0.135501	1	HSPA1A	681	14	19734	2.06986	1	1	1
GOTERM_BP_DIRECT	GO:1904692~positive regulation of type B pancreatic cell proliferation	1	0.135501	1	SFRP1	681	4	19734	7.24449	1	1	1
GOTERM_BP_DIRECT	GO:0006695~cholesterol biosynthetic process	1	0.135501	1	G6PD	681	40	19734	0.724449	1	1	1
GOTERM_BP_DIRECT	GO:0015888~thiamine transport	1	0.135501	1	SLC35F3	681	4	19734	7.24449	1	1	1
GOTERM_BP_DIRECT	GO:0002790~peptide secretion	1	0.135501	1	S100A8	681	3	19734	9.65932	1	1	1
GOTERM_BP_DIRECT	GO:0045218~zonula adherens maintenance	1	0.135501	1	KIFC3	681	3	19734	9.65932	1	1	1
GOTERM_BP_DIRECT	GO:0019371~cyclooxygenase pathway	1	0.135501	1	PTGS2	681	9	19734	3.21977	1	1	1
GOTERM_BP_DIRECT	GO:0098662~inorganic cation transmembrane transport	1	0.135501	1	P2RX3	681	23	19734	1.25991	1	1	1
GOTERM_BP_DIRECT	GO:0032761~positive regulation of lymphotoxin A production	1	0.135501	1	CD86	681	3	19734	9.65932	1	1	1
GOTERM_BP_DIRECT	GO:2000016~negative regulation of determination of dorsal identity	1	0.135501	1	SOSTDC1	681	2	19734	14.489	1	1	1
GOTERM_BP_DIRECT	GO:0070741~response to interleukin-6	1	0.135501	1	STAT4	681	5	19734	5.79559	1	1	1
GOTERM_BP_DIRECT	GO:0006836~neurotransmitter transport	1	0.135501	1	SV2B	681	42	19734	0.689952	1	1	1
GOTERM_BP_DIRECT	GO:0031053~primary miRNA processing	1	0.135501	1	SMAD1	681	13	19734	2.22907	1	1	1
GOTERM_BP_DIRECT	GO:0001920~negative regulation of receptor recycling	1	0.135501	1	PCSK9	681	5	19734	5.79559	1	1	1
GOTERM_BP_DIRECT	GO:0061337~cardiac conduction	1	0.135501	1	SLC4A3	681	10	19734	2.8978	1	1	1
GOTERM_BP_DIRECT	GO:0007586~digestion	1	0.135501	1	PRSS2	681	29	19734	0.99924	1	1	1
GOTERM_BP_DIRECT	GO:0010716~negative regulation of extracellular matrix disassembly	1	0.135501	1	DPP4	681	6	19734	4.82966	1	1	1
GOTERM_BP_DIRECT	GO:0006700~C21-steroid hormone biosynthetic process	1	0.135501	1	TSPO	681	9	19734	3.21977	1	1	1
GOTERM_BP_DIRECT	GO:0002469~myeloid dendritic cell antigen processing and presentation	1	0.135501	1	HLA-DRB1	681	3	19734	9.65932	1	1	1
GOTERM_BP_DIRECT	GO:0086050~membrane repolarization during bundle of His cell action potential	1	0.135501	1	KCNA5	681	1	19734	28.978	1	1	1
GOTERM_BP_DIRECT	GO:0045778~positive regulation of ossification	1	0.135501	1	TACR1	681	16	19734	1.81112	1	1	1
GOTERM_BP_DIRECT	GO:1905039~carboxylic acid transmembrane transport	1	0.135501	1	ABCC1	681	4	19734	7.24449	1	1	1
GOTERM_BP_DIRECT	GO:1903988~iron ion export across plasma membrane	1	0.135501	1	SLC40A1	681	1	19734	28.978	1	1	1
GOTERM_BP_DIRECT	GO:0071985~multivesicular body sorting pathway	1	0.135501	1	SYTL4	681	24	19734	1.20742	1	1	1
GOTERM_BP_DIRECT	GO:0032410~negative regulation of transporter activity	1	0.135501	1	SNCA	681	22	19734	1.31718	1	1	1
GOTERM_BP_DIRECT	GO:1905601~negative regulation of receptor-mediated endocytosis involved in cholesterol transport	1	0.135501	1	PCSK9	681	5	19734	5.79559	1	1	1
GOTERM_BP_DIRECT	GO:0033628~regulation of cell adhesion mediated by integrin	1	0.135501	1	PTK2	681	13	19734	2.22907	1	1	1
GOTERM_BP_DIRECT	GO:0045657~positive regulation of monocyte differentiation	1	0.135501	1	HLA-DRB1	681	10	19734	2.8978	1	1	1
GOTERM_BP_DIRECT	GO:0045143~homologous chromosome segregation	1	0.135501	1	MEIKIN	681	6	19734	4.82966	1	1	1
GOTERM_BP_DIRECT	GO:0060674~placenta blood vessel development	1	0.135501	1	ITGB8	681	14	19734	2.06986	1	1	1
GOTERM_BP_DIRECT	GO:0022038~corpus callosum development	1	0.135501	1	RTN4RL1	681	20	19734	1.4489	1	1	1
GOTERM_BP_DIRECT	GO:0030730~sequestering of triglyceride	1	0.135501	1	IL1B	681	4	19734	7.24449	1	1	1
GOTERM_BP_DIRECT	GO:0000086~G2/M transition of mitotic cell cycle	1	0.135501	1	PLCB1	681	51	19734	0.568196	1	1	1
GOTERM_BP_DIRECT	GO:0021785~branchiomotor neuron axon guidance	1	0.135501	1	PLXNA4	681	8	19734	3.62225	1	1	1
GOTERM_BP_DIRECT	GO:0048339~paraxial mesoderm development	1	0.135501	1	FGFR1	681	9	19734	3.21977	1	1	1
GOTERM_BP_DIRECT	GO:1904612~response to 2,3,7,8-tetrachlorodibenzodioxine	1	0.135501	1	F7	681	2	19734	14.489	1	1	1
GOTERM_BP_DIRECT	GO:1903779~regulation of cardiac conduction	1	0.135501	1	ATP2B1	681	22	19734	1.31718	1	1	1
GOTERM_BP_DIRECT	GO:0042310~vasoconstriction	1	0.135501	1	HTR7	681	19	19734	1.52516	1	1	1
GOTERM_BP_DIRECT	GO:0070268~cornification	1	0.135501	1	LIPM	681	8	19734	3.62225	1	1	1
GOTERM_BP_DIRECT	GO:0035036~sperm-egg recognition	1	0.135501	1	FOLR3	681	13	19734	2.22907	1	1	1
GOTERM_BP_DIRECT	GO:0010518~positive regulation of phospholipase activity	1	0.135501	1	FGFR1	681	7	19734	4.13971	1	1	1
GOTERM_BP_DIRECT	GO:0002313~mature B cell differentiation involved in immune response	1	0.135501	1	GPR183	681	4	19734	7.24449	1	1	1
GOTERM_BP_DIRECT	GO:0090238~positive regulation of arachidonic acid secretion	1	0.135501	1	AVPR1B	681	7	19734	4.13971	1	1	1
GOTERM_BP_DIRECT	GO:0090274~positive regulation of somatostatin secretion	1	0.135501	1	SCT	681	1	19734	28.978	1	1	1
GOTERM_BP_DIRECT	GO:1905664~regulation of calcium ion import across plasma membrane	1	0.135501	1	FYN	681	2	19734	14.489	1	1	1
GOTERM_BP_DIRECT	GO:0014805~smooth muscle adaptation	1	0.135501	1	IL1B	681	1	19734	28.978	1	1	1
GOTERM_BP_DIRECT	GO:1905931~negative regulation of vascular associated smooth muscle cell differentiation involved in phenotypic switching	1	0.135501	1	FGF9	681	2	19734	14.489	1	1	1
GOTERM_BP_DIRECT	GO:1903142~positive regulation of establishment of endothelial barrier	1	0.135501	1	PROC	681	6	19734	4.82966	1	1	1
GOTERM_BP_DIRECT	GO:0060373~regulation of ventricular cardiac muscle cell membrane depolarization	1	0.135501	1	CAV3	681	8	19734	3.62225	1	1	1
GOTERM_BP_DIRECT	GO:0045745~positive regulation of G protein-coupled receptor signaling pathway	1	0.135501	1	PDE6H	681	15	19734	1.93186	1	1	1
GOTERM_BP_DIRECT	GO:0097696~cell surface receptor signaling pathway via STAT	1	0.135501	1	LIF	681	5	19734	5.79559	1	1	1
GOTERM_BP_DIRECT	GO:0097411~hypoxia-inducible factor-1alpha signaling pathway	1	0.135501	1	CYBB	681	5	19734	5.79559	1	1	1
GOTERM_BP_DIRECT	GO:0046034~ATP metabolic process	1	0.135501	1	HSPA1A	681	32	19734	0.905562	1	1	1
GOTERM_BP_DIRECT	GO:0036465~synaptic vesicle recycling	1	0.135501	1	DNAJC6	681	14	19734	2.06986	1	1	1
GOTERM_BP_DIRECT	GO:0001573~ganglioside metabolic process	1	0.135501	1	ITGB8	681	4	19734	7.24449	1	1	1
GOTERM_BP_DIRECT	GO:0060022~hard palate development	1	0.135501	1	ITGB8	681	8	19734	3.62225	1	1	1
GOTERM_BP_DIRECT	GO:0050671~positive regulation of lymphocyte proliferation	1	0.135501	1	TACR1	681	7	19734	4.13971	1	1	1
GOTERM_BP_DIRECT	GO:0032596~protein transport into membrane raft	1	0.135501	1	RFTN1	681	2	19734	14.489	1	1	1
GOTERM_BP_DIRECT	GO:0048599~oocyte development	1	0.135501	1	BCL2	681	15	19734	1.93186	1	1	1
GOTERM_BP_DIRECT	GO:1900449~regulation of glutamate receptor signaling pathway	1	0.135501	1	FYN	681	3	19734	9.65932	1	1	1
GOTERM_BP_DIRECT	GO:0010025~wax biosynthetic process	1	0.135501	1	AWAT1	681	4	19734	7.24449	1	1	1
GOTERM_BP_DIRECT	GO:0034138~toll-like receptor 3 signaling pathway	1	0.135501	1	RFTN1	681	13	19734	2.22907	1	1	1
GOTERM_BP_DIRECT	GO:0072678~T cell migration	1	0.135501	1	GPR15	681	10	19734	2.8978	1	1	1
GOTERM_BP_DIRECT	GO:0008406~gonad development	1	0.135501	1	WT1	681	15	19734	1.93186	1	1	1
GOTERM_BP_DIRECT	GO:2000009~negative regulation of protein localization to cell surface	1	0.135501	1	CAV3	681	13	19734	2.22907	1	1	1
GOTERM_BP_DIRECT	GO:1902838~regulation of nuclear migration along microtubule	1	0.135501	1	TRIM58	681	1	19734	28.978	1	1	1
GOTERM_BP_DIRECT	GO:0015862~uridine transmembrane transport	1	0.135501	1	SLC28A3	681	6	19734	4.82966	1	1	1
GOTERM_BP_DIRECT	GO:1900076~regulation of cellular response to insulin stimulus	1	0.135501	1	ATP2B1	681	10	19734	2.8978	1	1	1
GOTERM_BP_DIRECT	GO:1905273~positive regulation of proton-transporting ATP synthase activity, rotational mechanism	1	0.135501	1	TMSB4X	681	3	19734	9.65932	1	1	1
GOTERM_BP_DIRECT	GO:0007600~sensory perception	1	0.135501	1	PDYN	681	11	19734	2.63436	1	1	1
GOTERM_BP_DIRECT	GO:0003223~ventricular compact myocardium morphogenesis	1	0.135501	1	POU4F1	681	7	19734	4.13971	1	1	1
GOTERM_BP_DIRECT	GO:0006144~purine nucleobase metabolic process	1	0.135501	1	URAD	681	7	19734	4.13971	1	1	1
GOTERM_BP_DIRECT	GO:0007040~lysosome organization	1	0.135501	1	GBA1	681	56	19734	0.517464	1	1	1
GOTERM_BP_DIRECT	GO:0048147~negative regulation of fibroblast proliferation	1	0.135501	1	SFRP1	681	37	19734	0.783188	1	1	1
GOTERM_BP_DIRECT	GO:0072676~lymphocyte migration	1	0.135501	1	GBA1	681	5	19734	5.79559	1	1	1
GOTERM_BP_DIRECT	GO:0072108~positive regulation of mesenchymal to epithelial transition involved in metanephros morphogenesis	1	0.135501	1	LIF	681	4	19734	7.24449	1	1	1
GOTERM_BP_DIRECT	GO:1901299~negative regulation of hydrogen peroxide-mediated programmed cell death	1	0.135501	1	HGF	681	7	19734	4.13971	1	1	1
GOTERM_BP_DIRECT	GO:0010737~protein kinase A signaling	1	0.135501	1	TCP11	681	25	19734	1.15912	1	1	1
GOTERM_BP_DIRECT	GO:0030157~pancreatic juice secretion	1	0.135501	1	SCT	681	7	19734	4.13971	1	1	1
GOTERM_BP_DIRECT	GO:0048681~negative regulation of axon regeneration	1	0.135501	1	RTN4RL1	681	11	19734	2.63436	1	1	1
GOTERM_BP_DIRECT	GO:0046651~lymphocyte proliferation	1	0.135501	1	FLT3	681	7	19734	4.13971	1	1	1
GOTERM_BP_DIRECT	GO:0001956~positive regulation of neurotransmitter secretion	1	0.135501	1	SNCA	681	9	19734	3.21977	1	1	1
GOTERM_BP_DIRECT	GO:0034765~regulation of monoatomic ion transmembrane transport	1	0.135501	1	STOM	681	24	19734	1.20742	1	1	1
GOTERM_BP_DIRECT	GO:0007163~establishment or maintenance of cell polarity	1	0.135501	1	RAC2	681	47	19734	0.616553	1	1	1
GOTERM_BP_DIRECT	GO:0042438~melanin biosynthetic process	1	0.135501	1	OCA2	681	13	19734	2.22907	1	1	1
GOTERM_BP_DIRECT	GO:0051792~medium-chain fatty acid biosynthetic process	1	0.135501	1	OLAH	681	6	19734	4.82966	1	1	1
GOTERM_BP_DIRECT	GO:1990268~response to gold nanoparticle	1	0.135501	1	MPO	681	2	19734	14.489	1	1	1
GOTERM_BP_DIRECT	GO:0002793~positive regulation of peptide secretion	1	0.135501	1	S100A8	681	2	19734	14.489	1	1	1
GOTERM_BP_DIRECT	GO:0003274~endocardial cushion fusion	1	0.135501	1	ACVR1	681	5	19734	5.79559	1	1	1
GOTERM_BP_DIRECT	GO:1904385~cellular response to angiotensin	1	0.135501	1	PRKD1	681	16	19734	1.81112	1	1	1
GOTERM_BP_DIRECT	GO:0071874~cellular response to norepinephrine stimulus	1	0.135501	1	PRKD1	681	2	19734	14.489	1	1	1
GOTERM_BP_DIRECT	GO:0030050~vesicle transport along actin filament	1	0.135501	1	MYO5C	681	20	19734	1.4489	1	1	1
GOTERM_BP_DIRECT	GO:0061445~endocardial cushion cell fate commitment	1	0.135501	1	ACVR1	681	1	19734	28.978	1	1	1
GOTERM_BP_DIRECT	GO:0015855~pyrimidine nucleobase transport	1	0.135501	1	SLC28A3	681	4	19734	7.24449	1	1	1
GOTERM_BP_DIRECT	GO:0003214~cardiac left ventricle morphogenesis	1	0.135501	1	SFRP2	681	10	19734	2.8978	1	1	1
GOTERM_BP_DIRECT	GO:0030502~negative regulation of bone mineralization	1	0.135501	1	SRGN	681	17	19734	1.70459	1	1	1
GOTERM_BP_DIRECT	GO:0038063~collagen-activated tyrosine kinase receptor signaling pathway	1	0.135501	1	UBASH3B	681	12	19734	2.41483	1	1	1
GOTERM_BP_DIRECT	GO:1905475~regulation of protein localization to membrane	1	0.135501	1	GPC5	681	4	19734	7.24449	1	1	1
GOTERM_BP_DIRECT	GO:0051240~positive regulation of multicellular organismal process	1	0.135501	1	IL6	681	1	19734	28.978	1	1	1
GOTERM_BP_DIRECT	GO:0032233~positive regulation of actin filament bundle assembly	1	0.135501	1	SYNPO2L	681	14	19734	2.06986	1	1	1
GOTERM_BP_DIRECT	GO:0050708~regulation of protein secretion	1	0.135501	1	RHBDF1	681	17	19734	1.70459	1	1	1
GOTERM_BP_DIRECT	GO:0003094~glomerular filtration	1	0.135501	1	JCHAIN	681	20	19734	1.4489	1	1	1
GOTERM_BP_DIRECT	GO:0097119~postsynaptic density protein 95 clustering	1	0.135501	1	LRRC4	681	7	19734	4.13971	1	1	1
GOTERM_BP_DIRECT	GO:0015732~prostaglandin transport	1	0.135501	1	ABCC4	681	12	19734	2.41483	1	1	1
GOTERM_BP_DIRECT	GO:0002003~angiotensin maturation	1	0.135501	1	CTSG	681	9	19734	3.21977	1	1	1
GOTERM_BP_DIRECT	GO:0010989~negative regulation of low-density lipoprotein particle clearance	1	0.135501	1	PCSK9	681	15	19734	1.93186	1	1	1
GOTERM_BP_DIRECT	GO:0070085~glycosylation	1	0.135501	1	GRM7	681	17	19734	1.70459	1	1	1
GOTERM_BP_DIRECT	GO:0048210~Golgi vesicle fusion to target membrane	1	0.135501	1	NKD2	681	6	19734	4.82966	1	1	1
GOTERM_BP_DIRECT	GO:0097267~omega-hydroxylase P450 pathway	1	0.135501	1	CYP4F3	681	12	19734	2.41483	1	1	1
GOTERM_BP_DIRECT	GO:2001200~positive regulation of dendritic cell differentiation	1	0.135501	1	ZBTB46	681	4	19734	7.24449	1	1	1
GOTERM_BP_DIRECT	GO:0097022~lymphocyte migration into lymph node	1	0.135501	1	FUT4	681	4	19734	7.24449	1	1	1
GOTERM_BP_DIRECT	GO:0032714~negative regulation of interleukin-5 production	1	0.135501	1	TNFRSF21	681	8	19734	3.62225	1	1	1
GOTERM_BP_DIRECT	GO:0040010~positive regulation of growth rate	1	0.135501	1	RFTN1	681	3	19734	9.65932	1	1	1
GOTERM_BP_DIRECT	GO:0045807~positive regulation of endocytosis	1	0.135501	1	SNCA	681	20	19734	1.4489	1	1	1
GOTERM_BP_DIRECT	GO:1902966~positive regulation of protein localization to early endosome	1	0.135501	1	EGF	681	10	19734	2.8978	1	1	1
GOTERM_BP_DIRECT	GO:1903444~negative regulation of brown fat cell differentiation	1	0.135501	1	SLC7A10	681	5	19734	5.79559	1	1	1
GOTERM_BP_DIRECT	GO:1905165~regulation of lysosomal protein catabolic process	1	0.135501	1	GBA1	681	3	19734	9.65932	1	1	1
GOTERM_BP_DIRECT	GO:0008333~endosome to lysosome transport	1	0.135501	1	PCDHGA3	681	52	19734	0.557269	1	1	1
GOTERM_BP_DIRECT	GO:0021696~cerebellar cortex morphogenesis	1	0.135501	1	GLI2	681	6	19734	4.82966	1	1	1
GOTERM_BP_DIRECT	GO:1902624~positive regulation of neutrophil migration	1	0.135501	1	FUT4	681	6	19734	4.82966	1	1	1
GOTERM_BP_DIRECT	GO:0010559~regulation of glycoprotein biosynthetic process	1	0.135501	1	BCL2	681	2	19734	14.489	1	1	1
GOTERM_BP_DIRECT	GO:0030259~lipid glycosylation	1	0.135501	1	GBA1	681	12	19734	2.41483	1	1	1
GOTERM_BP_DIRECT	GO:1903597~negative regulation of gap junction assembly	1	0.135501	1	IL1B	681	2	19734	14.489	1	1	1
GOTERM_BP_DIRECT	GO:0086001~cardiac muscle cell action potential	1	0.135501	1	SLC4A3	681	2	19734	14.489	1	1	1
GOTERM_BP_DIRECT	GO:1903421~regulation of synaptic vesicle recycling	1	0.135501	1	SNCA	681	2	19734	14.489	1	1	1
GOTERM_BP_DIRECT	GO:1904427~positive regulation of calcium ion transmembrane transport	1	0.135501	1	PLP1	681	2	19734	14.489	1	1	1
GOTERM_BP_DIRECT	GO:1902175~regulation of oxidative stress-induced intrinsic apoptotic signaling pathway	1	0.135501	1	P4HB	681	2	19734	14.489	1	1	1
GOTERM_BP_DIRECT	GO:1900149~positive regulation of Schwann cell migration	1	0.135501	1	RRAS2	681	3	19734	9.65932	1	1	1
GOTERM_BP_DIRECT	GO:2000969~positive regulation of AMPA receptor activity	1	0.135501	1	SHANK3	681	4	19734	7.24449	1	1	1
GOTERM_BP_DIRECT	GO:0031529~ruffle organization	1	0.135501	1	CARMIL1	681	14	19734	2.06986	1	1	1
GOTERM_BP_DIRECT	GO:1902219~negative regulation of intrinsic apoptotic signaling pathway in response to osmotic stress	1	0.135501	1	PTGS2	681	4	19734	7.24449	1	1	1
GOTERM_BP_DIRECT	GO:0030903~notochord development	1	0.135501	1	COBL	681	13	19734	2.22907	1	1	1
GOTERM_BP_DIRECT	GO:1901525~negative regulation of mitophagy	1	0.135501	1	TSPO	681	7	19734	4.13971	1	1	1
GOTERM_BP_DIRECT	GO:0046579~positive regulation of Ras protein signal transduction	1	0.135501	1	SRC	681	23	19734	1.25991	1	1	1
GOTERM_BP_DIRECT	GO:0003308~negative regulation of Wnt signaling pathway involved in heart development	1	0.135501	1	ALPK2	681	1	19734	28.978	1	1	1
GOTERM_BP_DIRECT	GO:0033157~regulation of intracellular protein transport	1	0.135501	1	SH3TC2	681	6	19734	4.82966	1	1	1
GOTERM_BP_DIRECT	GO:0061036~positive regulation of cartilage development	1	0.135501	1	SMAD1	681	18	19734	1.60989	1	1	1
GOTERM_BP_DIRECT	GO:0019858~cytosine metabolic process	1	0.135501	1	CDA	681	2	19734	14.489	1	1	1
GOTERM_BP_DIRECT	GO:0002312~B cell activation involved in immune response	1	0.135501	1	GPR183	681	2	19734	14.489	1	1	1
GOTERM_BP_DIRECT	GO:1904465~negative regulation of matrix metallopeptidase secretion	1	0.135501	1	CD200	681	7	19734	4.13971	1	1	1
GOTERM_BP_DIRECT	GO:0034499~late endosome to Golgi transport	1	0.135501	1	RGPD6	681	8	19734	3.62225	1	1	1
GOTERM_BP_DIRECT	GO:0042711~maternal behavior	1	0.135501	1	AVPR1A	681	15	19734	1.93186	1	1	1
GOTERM_BP_DIRECT	GO:0046900~tetrahydrofolylpolyglutamate metabolic process	1	0.135501	1	GGH	681	1	19734	28.978	1	1	1
GOTERM_BP_DIRECT	GO:0060603~mammary gland duct morphogenesis	1	0.135501	1	GLI2	681	7	19734	4.13971	1	1	1
GOTERM_BP_DIRECT	GO:0006259~DNA metabolic process	1	0.135501	1	DNTT	681	26	19734	1.11454	1	1	1
GOTERM_BP_DIRECT	GO:0050665~hydrogen peroxide biosynthetic process	1	0.135501	1	CYBB	681	11	19734	2.63436	1	1	1
GOTERM_BP_DIRECT	GO:0032849~positive regulation of cellular pH reduction	1	0.135501	1	AVPR1A	681	4	19734	7.24449	1	1	1
GOTERM_BP_DIRECT	GO:0042376~phylloquinone catabolic process	1	0.135501	1	CYP4F3	681	6	19734	4.82966	1	1	1
GOTERM_BP_DIRECT	GO:0046655~folic acid metabolic process	1	0.135501	1	MTHFD2L	681	16	19734	1.81112	1	1	1
GOTERM_BP_DIRECT	GO:0021934~hindbrain tangential cell migration	1	0.135501	1	EPHB1	681	3	19734	9.65932	1	1	1
GOTERM_BP_DIRECT	GO:0061032~visceral serous pericardium development	1	0.135501	1	WT1	681	2	19734	14.489	1	1	1
GOTERM_BP_DIRECT	GO:0006638~neutral lipid metabolic process	1	0.135501	1	SNCA	681	1	19734	28.978	1	1	1
GOTERM_BP_DIRECT	GO:0045794~negative regulation of cell volume	1	0.135501	1	SHANK3	681	5	19734	5.79559	1	1	1
GOTERM_BP_DIRECT	GO:1903426~regulation of reactive oxygen species biosynthetic process	1	0.135501	1	SNCA	681	9	19734	3.21977	1	1	1
GOTERM_BP_DIRECT	GO:0019367~fatty acid elongation, saturated fatty acid	1	0.135501	1	ELOVL3	681	8	19734	3.62225	1	1	1
GOTERM_BP_DIRECT	GO:0042572~retinol metabolic process	1	0.135501	1	ADH1C	681	54	19734	0.536629	1	1	1
GOTERM_BP_DIRECT	GO:0002027~regulation of heart rate	1	0.135501	1	CAV3	681	35	19734	0.827942	1	1	1
GOTERM_BP_DIRECT	GO:0150052~regulation of postsynapse assembly	1	0.135501	1	DOCK1	681	6	19734	4.82966	1	1	1
GOTERM_BP_DIRECT	GO:0097114~NMDA glutamate receptor clustering	1	0.135501	1	SHANK3	681	5	19734	5.79559	1	1	1
GOTERM_BP_DIRECT	GO:1901805~beta-glucoside catabolic process	1	0.135501	1	GBA1	681	2	19734	14.489	1	1	1
GOTERM_BP_DIRECT	GO:0045165~cell fate commitment	1	0.135501	1	WNT9A	681	57	19734	0.508386	1	1	1
GOTERM_BP_DIRECT	GO:0034112~positive regulation of homotypic cell-cell adhesion	1	0.135501	1	ANK3	681	5	19734	5.79559	1	1	1
GOTERM_BP_DIRECT	GO:2000641~regulation of early endosome to late endosome transport	1	0.135501	1	SRC	681	8	19734	3.62225	1	1	1
GOTERM_BP_DIRECT	GO:0007005~mitochondrion organization	1	0.135501	1	NUBPL	681	106	19734	0.273377	1	1	1
GOTERM_BP_DIRECT	GO:0070981~L-asparagine biosynthetic process	1	0.135501	1	ASNS	681	1	19734	28.978	1	1	1
GOTERM_BP_DIRECT	GO:1900826~negative regulation of membrane depolarization during cardiac muscle cell action potential	1	0.135501	1	CAV3	681	1	19734	28.978	1	1	1
GOTERM_BP_DIRECT	GO:0043312~neutrophil degranulation	1	0.135501	1	ANXA3	681	5	19734	5.79559	1	1	1
GOTERM_BP_DIRECT	GO:0018401~peptidyl-proline hydroxylation to 4-hydroxy-L-proline	1	0.135501	1	P4HB	681	8	19734	3.62225	1	1	1
GOTERM_BP_DIRECT	GO:1902480~protein localization to mitotic spindle	1	0.135501	1	FAM83B	681	6	19734	4.82966	1	1	1
GOTERM_BP_DIRECT	GO:0046887~positive regulation of hormone secretion	1	0.135501	1	TACR1	681	8	19734	3.62225	1	1	1
GOTERM_BP_DIRECT	GO:0070254~mucus secretion	1	0.135501	1	PRKCE	681	13	19734	2.22907	1	1	1
GOTERM_BP_DIRECT	GO:0060337~type I interferon-mediated signaling pathway	1	0.135501	1	IFNK	681	48	19734	0.603708	1	1	1
GOTERM_BP_DIRECT	GO:1900127~positive regulation of hyaluronan biosynthetic process	1	0.135501	1	EGF	681	4	19734	7.24449	1	1	1
GOTERM_BP_DIRECT	GO:0099502~calcium-dependent activation of synaptic vesicle fusion	1	0.135501	1	DOC2B	681	4	19734	7.24449	1	1	1
GOTERM_BP_DIRECT	GO:0060081~membrane hyperpolarization	1	0.135501	1	KCNA5	681	9	19734	3.21977	1	1	1
GOTERM_BP_DIRECT	GO:0046596~regulation of viral entry into host cell	1	0.135501	1	TRIM58	681	20	19734	1.4489	1	1	1
GOTERM_BP_DIRECT	GO:0021568~rhombomere 2 development	1	0.135501	1	HOXA2	681	2	19734	14.489	1	1	1
GOTERM_BP_DIRECT	GO:0010762~regulation of fibroblast migration	1	0.135501	1	GNA12	681	13	19734	2.22907	1	1	1
GOTERM_BP_DIRECT	GO:0017186~peptidyl-pyroglutamic acid biosynthetic process, using glutaminyl-peptide cyclotransferase	1	0.135501	1	QPCT	681	2	19734	14.489	1	1	1
GOTERM_BP_DIRECT	GO:0022409~positive regulation of cell-cell adhesion	1	0.135501	1	KIF26B	681	18	19734	1.60989	1	1	1
GOTERM_BP_DIRECT	GO:0070848~response to growth factor	1	0.135501	1	ANXA3	681	15	19734	1.93186	1	1	1
GOTERM_BP_DIRECT	GO:0042761~very long-chain fatty acid biosynthetic process	1	0.135501	1	ELOVL3	681	13	19734	2.22907	1	1	1
GOTERM_BP_DIRECT	GO:0045725~positive regulation of glycogen biosynthetic process	1	0.135501	1	SORBS1	681	15	19734	1.93186	1	1	1
GOTERM_BP_DIRECT	GO:1901642~nucleoside transmembrane transport	1	0.135501	1	SLC28A3	681	7	19734	4.13971	1	1	1
GOTERM_BP_DIRECT	GO:0003183~mitral valve morphogenesis	1	0.135501	1	ACVR1	681	10	19734	2.8978	1	1	1
GOTERM_BP_DIRECT	GO:0035050~embryonic heart tube development	1	0.135501	1	PLXNA4	681	19	19734	1.52516	1	1	1
GOTERM_BP_DIRECT	GO:0072302~negative regulation of metanephric glomerular mesangial cell proliferation	1	0.135501	1	WT1	681	1	19734	28.978	1	1	1
GOTERM_BP_DIRECT	GO:0045576~mast cell activation	1	0.135501	1	S100A12	681	6	19734	4.82966	1	1	1
GOTERM_BP_DIRECT	GO:0001894~tissue homeostasis	1	0.135501	1	CUBN	681	26	19734	1.11454	1	1	1
GOTERM_BP_DIRECT	GO:0010455~positive regulation of cell fate commitment	1	0.135501	1	SPDEF	681	6	19734	4.82966	1	1	1
GOTERM_BP_DIRECT	GO:0045185~maintenance of protein location	1	0.135501	1	IGSF11	681	2	19734	14.489	1	1	1
GOTERM_BP_DIRECT	GO:0043647~inositol phosphate metabolic process	1	0.135501	1	INPP4B	681	16	19734	1.81112	1	1	1
GOTERM_BP_DIRECT	GO:0001776~leukocyte homeostasis	1	0.135501	1	FLT3	681	3	19734	9.65932	1	1	1
GOTERM_BP_DIRECT	GO:0010810~regulation of cell-substrate adhesion	1	0.135501	1	RAC2	681	5	19734	5.79559	1	1	1
GOTERM_BP_DIRECT	GO:0071383~cellular response to steroid hormone stimulus	1	0.135501	1	HSPA1A	681	17	19734	1.70459	1	1	1
GOTERM_BP_DIRECT	GO:0061028~establishment of endothelial barrier	1	0.135501	1	PPP1R16B	681	21	19734	1.3799	1	1	1
GOTERM_BP_DIRECT	GO:0042278~purine nucleoside metabolic process	1	0.135501	1	MACROD1	681	3	19734	9.65932	1	1	1
GOTERM_BP_DIRECT	GO:0007500~mesodermal cell fate determination	1	0.135501	1	TRIM15	681	3	19734	9.65932	1	1	1
GOTERM_BP_DIRECT	GO:0042921~nuclear receptor-mediated glucocorticoid signaling pathway	1	0.135501	1	CALR	681	6	19734	4.82966	1	1	1
GOTERM_BP_DIRECT	GO:0010996~response to auditory stimulus	1	0.135501	1	TACR1	681	22	19734	1.31718	1	1	1
GOTERM_BP_DIRECT	GO:0042327~positive regulation of phosphorylation	1	0.135501	1	EGF	681	25	19734	1.15912	1	1	1
GOTERM_BP_DIRECT	GO:0042060~wound healing	1	0.135501	1	PDGFA	681	78	19734	0.371512	1	1	1
GOTERM_BP_DIRECT	GO:0006664~glycolipid metabolic process	1	0.135501	1	FUT2	681	2	19734	14.489	1	1	1
GOTERM_BP_DIRECT	GO:2000853~negative regulation of corticosterone secretion	1	0.135501	1	TSPO	681	1	19734	28.978	1	1	1
GOTERM_BP_DIRECT	GO:1902482~regulatory T cell apoptotic process	1	0.135501	1	PDCD1	681	1	19734	28.978	1	1	1
GOTERM_BP_DIRECT	GO:0032819~positive regulation of natural killer cell proliferation	1	0.135501	1	IL15	681	11	19734	2.63436	1	1	1
GOTERM_BP_DIRECT	GO:0009913~epidermal cell differentiation	1	0.135501	1	GLI2	681	9	19734	3.21977	1	1	1
GOTERM_BP_DIRECT	GO:0032874~positive regulation of stress-activated MAPK cascade	1	0.135501	1	INAVA	681	22	19734	1.31718	1	1	1
GOTERM_BP_DIRECT	GO:0051622~negative regulation of norepinephrine uptake	1	0.135501	1	SNCA	681	1	19734	28.978	1	1	1
GOTERM_BP_DIRECT	GO:0009253~peptidoglycan catabolic process	1	0.135501	1	PGLYRP1	681	6	19734	4.82966	1	1	1
GOTERM_BP_DIRECT	GO:0045956~positive regulation of calcium ion-dependent exocytosis	1	0.135501	1	DOC2B	681	13	19734	2.22907	1	1	1
GOTERM_BP_DIRECT	GO:0051924~regulation of calcium ion transport	1	0.135501	1	BCL2	681	23	19734	1.25991	1	1	1
GOTERM_BP_DIRECT	GO:0034329~cell junction assembly	1	0.135501	1	GRHL2	681	8	19734	3.62225	1	1	1
GOTERM_BP_DIRECT	GO:0060831~smoothened signaling pathway involved in dorsal/ventral neural tube patterning	1	0.135501	1	GLI2	681	5	19734	5.79559	1	1	1
GOTERM_BP_DIRECT	GO:0001710~mesodermal cell fate commitment	1	0.135501	1	SMAD1	681	1	19734	28.978	1	1	1
GOTERM_BP_DIRECT	GO:1903416~response to glycoside	1	0.135501	1	CALR	681	4	19734	7.24449	1	1	1
GOTERM_BP_DIRECT	GO:1904823~purine nucleobase transmembrane transport	1	0.135501	1	SLC28A3	681	7	19734	4.13971	1	1	1
GOTERM_BP_DIRECT	GO:0060989~lipid tube assembly involved in organelle fusion	1	0.135501	1	PCDHGA3	681	1	19734	28.978	1	1	1
GOTERM_BP_DIRECT	GO:0002384~hepatic immune response	1	0.135501	1	IL6	681	2	19734	14.489	1	1	1
GOTERM_BP_DIRECT	GO:0001779~natural killer cell differentiation	1	0.135501	1	IL15	681	17	19734	1.70459	1	1	1
GOTERM_BP_DIRECT	GO:0046324~regulation of glucose import	1	0.135501	1	PRKAG2	681	9	19734	3.21977	1	1	1
GOTERM_BP_DIRECT	GO:0070527~platelet aggregation	1	0.135501	1	UBASH3B	681	49	19734	0.591387	1	1	1
GOTERM_BP_DIRECT	GO:0099149~regulation of postsynaptic neurotransmitter receptor internalization	1	0.135501	1	GSG1L	681	19	19734	1.52516	1	1	1
GOTERM_BP_DIRECT	GO:0043405~regulation of MAP kinase activity	1	0.135501	1	TRIB3	681	9	19734	3.21977	1	1	1
GOTERM_BP_DIRECT	GO:0097340~inhibition of cysteine-type endopeptidase activity	1	0.135501	1	CST7	681	6	19734	4.82966	1	1	1
GOTERM_BP_DIRECT	GO:0042308~negative regulation of protein import into nucleus	1	0.135501	1	ANGPT1	681	16	19734	1.81112	1	1	1
GOTERM_BP_DIRECT	GO:0048701~embryonic cranial skeleton morphogenesis	1	0.135501	1	GRHL2	681	31	19734	0.934773	1	1	1
GOTERM_BP_DIRECT	GO:2000697~negative regulation of epithelial cell differentiation involved in kidney development	1	0.135501	1	MMP9	681	1	19734	28.978	1	1	1
GOTERM_BP_DIRECT	GO:0051048~negative regulation of secretion	1	0.135501	1	EGF	681	3	19734	9.65932	1	1	1
GOTERM_BP_DIRECT	GO:0051974~negative regulation of telomerase activity	1	0.135501	1	SRC	681	9	19734	3.21977	1	1	1
GOTERM_BP_DIRECT	GO:0003211~cardiac ventricle formation	1	0.135501	1	MEF2C	681	3	19734	9.65932	1	1	1
GOTERM_BP_DIRECT	GO:0017158~regulation of calcium ion-dependent exocytosis	1	0.135501	1	DOC2B	681	23	19734	1.25991	1	1	1
GOTERM_BP_DIRECT	GO:0021513~spinal cord dorsal/ventral patterning	1	0.135501	1	GLI2	681	6	19734	4.82966	1	1	1
GOTERM_BP_DIRECT	GO:0086014~atrial cardiac muscle cell action potential	1	0.135501	1	KCNA5	681	9	19734	3.21977	1	1	1
GOTERM_BP_DIRECT	GO:0031146~SCF-dependent proteasomal ubiquitin-dependent protein catabolic process	1	0.135501	1	FBXL13	681	49	19734	0.591387	1	1	1
GOTERM_BP_DIRECT	GO:0048880~sensory system development	1	0.135501	1	POU4F1	681	3	19734	9.65932	1	1	1
GOTERM_BP_DIRECT	GO:0015816~glycine transport	1	0.135501	1	SLC7A10	681	11	19734	2.63436	1	1	1
GOTERM_BP_DIRECT	GO:0010460~positive regulation of heart rate	1	0.135501	1	AVPR1A	681	22	19734	1.31718	1	1	1
GOTERM_BP_DIRECT	GO:0036145~dendritic cell homeostasis	1	0.135501	1	GPR183	681	2	19734	14.489	1	1	1
GOTERM_BP_DIRECT	GO:0002115~store-operated calcium entry	1	0.135501	1	CRACR2B	681	9	19734	3.21977	1	1	1
GOTERM_BP_DIRECT	GO:0007602~phototransduction	1	0.135501	1	GPR52	681	35	19734	0.827942	1	1	1
GOTERM_BP_DIRECT	GO:0045820~negative regulation of glycolytic process	1	0.135501	1	CBFA2T3	681	16	19734	1.81112	1	1	1
GOTERM_BP_DIRECT	GO:0050909~sensory perception of taste	1	0.135501	1	P2RX3	681	16	19734	1.81112	1	1	1
GOTERM_BP_DIRECT	GO:0006661~phosphatidylinositol biosynthetic process	1	0.135501	1	INPP4B	681	45	19734	0.643955	1	1	1
GOTERM_BP_DIRECT	GO:0010730~negative regulation of hydrogen peroxide biosynthetic process	1	0.135501	1	FYN	681	3	19734	9.65932	1	1	1
GOTERM_BP_DIRECT	GO:0070662~mast cell proliferation	1	0.135501	1	RAC2	681	6	19734	4.82966	1	1	1
GOTERM_BP_DIRECT	GO:2000677~regulation of transcription regulatory region DNA binding	1	0.135501	1	RNF220	681	4	19734	7.24449	1	1	1
GOTERM_BP_DIRECT	GO:0051894~positive regulation of focal adhesion assembly	1	0.135501	1	SFRP1	681	26	19734	1.11454	1	1	1
GOTERM_BP_DIRECT	GO:0060306~regulation of membrane repolarization	1	0.135501	1	AKAP6	681	14	19734	2.06986	1	1	1
GOTERM_BP_DIRECT	GO:0002842~positive regulation of T cell mediated immune response to tumor cell	1	0.135501	1	HLA-DRB1	681	4	19734	7.24449	1	1	1
GOTERM_BP_DIRECT	GO:0044419~biological process involved in interspecies interaction between organisms	1	0.135501	1	CD207	681	10	19734	2.8978	1	1	1
GOTERM_BP_DIRECT	GO:0009408~response to heat	1	0.135501	1	P2RX3	681	43	19734	0.673906	1	1	1
GOTERM_BP_DIRECT	GO:0045793~positive regulation of cell size	1	0.135501	1	PRKD1	681	13	19734	2.22907	1	1	1
GOTERM_BP_DIRECT	GO:1901381~positive regulation of potassium ion transmembrane transport	1	0.135501	1	AKAP6	681	17	19734	1.70459	1	1	1
GOTERM_BP_DIRECT	GO:2000556~positive regulation of T-helper 1 cell cytokine production	1	0.135501	1	IL1B	681	8	19734	3.62225	1	1	1
GOTERM_BP_DIRECT	GO:0033292~T-tubule organization	1	0.135501	1	CAV3	681	9	19734	3.21977	1	1	1
GOTERM_BP_DIRECT	GO:0090277~positive regulation of peptide hormone secretion	1	0.135501	1	PRKD1	681	12	19734	2.41483	1	1	1
GOTERM_BP_DIRECT	GO:1990874~vascular associated smooth muscle cell proliferation	1	0.135501	1	CALCRL	681	6	19734	4.82966	1	1	1
GOTERM_BP_DIRECT	GO:0097068~response to thyroxine	1	0.135501	1	F7	681	3	19734	9.65932	1	1	1
GOTERM_BP_DIRECT	GO:1904100~positive regulation of protein O-linked glycosylation	1	0.135501	1	IL15	681	3	19734	9.65932	1	1	1
GOTERM_BP_DIRECT	GO:0009303~rRNA transcription	1	0.135501	1	CAVIN1	681	13	19734	2.22907	1	1	1
GOTERM_BP_DIRECT	GO:1904263~positive regulation of TORC1 signaling	1	0.135501	1	SRC	681	56	19734	0.517464	1	1	1
GOTERM_BP_DIRECT	GO:0090136~epithelial cell-cell adhesion	1	0.135501	1	KIFC3	681	12	19734	2.41483	1	1	1
GOTERM_BP_DIRECT	GO:0000255~allantoin metabolic process	1	0.135501	1	URAD	681	8	19734	3.62225	1	1	1
GOTERM_BP_DIRECT	GO:0099178~regulation of retrograde trans-synaptic signaling by endocanabinoid	1	0.135501	1	PLCB1	681	3	19734	9.65932	1	1	1
GOTERM_BP_DIRECT	GO:0032026~response to magnesium ion	1	0.135501	1	SNCA	681	12	19734	2.41483	1	1	1
GOTERM_BP_DIRECT	GO:0018242~protein O-linked glycosylation via serine	1	0.135501	1	MGAT5B	681	10	19734	2.8978	1	1	1
GOTERM_BP_DIRECT	GO:0007530~sex determination	1	0.135501	1	WT1	681	7	19734	4.13971	1	1	1
GOTERM_BP_DIRECT	GO:1903465~positive regulation of mitotic cell cycle DNA replication	1	0.135501	1	FGFR1	681	1	19734	28.978	1	1	1
GOTERM_BP_DIRECT	GO:0072657~protein localization to membrane	1	0.135501	1	PACSIN1	681	28	19734	1.03493	1	1	1
GOTERM_BP_DIRECT	GO:0060292~long-term synaptic depression	1	0.135501	1	SHANK3	681	22	19734	1.31718	1	1	1
GOTERM_BP_DIRECT	GO:0006091~generation of precursor metabolites and energy	1	0.135501	1	AVPR1A	681	47	19734	0.616553	1	1	1
GOTERM_BP_DIRECT	GO:0007356~thorax and anterior abdomen determination	1	0.135501	1	WT1	681	5	19734	5.79559	1	1	1
GOTERM_BP_DIRECT	GO:0072540~T-helper 17 cell lineage commitment	1	0.135501	1	IL6	681	10	19734	2.8978	1	1	1
GOTERM_BP_DIRECT	GO:0090521~podocyte cell migration	1	0.135501	1	DAAM2	681	7	19734	4.13971	1	1	1
GOTERM_BP_DIRECT	GO:1900158~negative regulation of bone mineralization involved in bone maturation	1	0.135501	1	RFLNB	681	5	19734	5.79559	1	1	1
GOTERM_BP_DIRECT	GO:0060828~regulation of canonical Wnt signaling pathway	1	0.135501	1	DAAM2	681	35	19734	0.827942	1	1	1
GOTERM_BP_DIRECT	GO:1905608~positive regulation of presynapse assembly	1	0.135501	1	EFNB3	681	2	19734	14.489	1	1	1
GOTERM_BP_DIRECT	GO:0042953~lipoprotein transport	1	0.135501	1	CUBN	681	21	19734	1.3799	1	1	1
GOTERM_BP_DIRECT	GO:0071651~positive regulation of chemokine (C-C motif) ligand 5 production	1	0.135501	1	DEFB124	681	7	19734	4.13971	1	1	1
GOTERM_BP_DIRECT	GO:0034314~Arp2/3 complex-mediated actin nucleation	1	0.135501	1	ARPC5	681	28	19734	1.03493	1	1	1
GOTERM_BP_DIRECT	GO:0042770~signal transduction in response to DNA damage	1	0.135501	1	GADD45A	681	17	19734	1.70459	1	1	1
GOTERM_BP_DIRECT	GO:0045948~positive regulation of translational initiation	1	0.135501	1	BOLL	681	20	19734	1.4489	1	1	1
GOTERM_BP_DIRECT	GO:2000096~positive regulation of Wnt signaling pathway, planar cell polarity pathway	1	0.135501	1	MLLT3	681	9	19734	3.21977	1	1	1
GOTERM_BP_DIRECT	GO:2000256~positive regulation of male germ cell proliferation	1	0.135501	1	SRC	681	2	19734	14.489	1	1	1
GOTERM_BP_DIRECT	GO:0001787~natural killer cell proliferation	1	0.135501	1	IL15	681	6	19734	4.82966	1	1	1
GOTERM_BP_DIRECT	GO:0006680~glucosylceramide catabolic process	1	0.135501	1	GBA1	681	3	19734	9.65932	1	1	1
GOTERM_BP_DIRECT	GO:0001714~endodermal cell fate specification	1	0.135501	1	NANOG	681	6	19734	4.82966	1	1	1
GOTERM_BP_DIRECT	GO:0016486~peptide hormone processing	1	0.135501	1	DPP4	681	17	19734	1.70459	1	1	1
GOTERM_BP_DIRECT	GO:0097398~cellular response to interleukin-17	1	0.135501	1	IL1B	681	6	19734	4.82966	1	1	1
GOTERM_BP_DIRECT	GO:0043084~penile erection	1	0.135501	1	ACVR2A	681	2	19734	14.489	1	1	1
GOTERM_BP_DIRECT	GO:0002438~acute inflammatory response to antigenic stimulus	1	0.135501	1	ELANE	681	6	19734	4.82966	1	1	1
GOTERM_BP_DIRECT	GO:0050871~positive regulation of B cell activation	1	0.135501	1	IL6	681	7	19734	4.13971	1	1	1
GOTERM_BP_DIRECT	GO:0009755~hormone-mediated signaling pathway	1	0.135501	1	LHCGR	681	45	19734	0.643955	1	1	1
GOTERM_BP_DIRECT	GO:0038130~ERBB4 signaling pathway	1	0.135501	1	NRG3	681	3	19734	9.65932	1	1	1
GOTERM_BP_DIRECT	GO:0099050~vesicle scission	1	0.135501	1	DNM1	681	2	19734	14.489	1	1	1
GOTERM_BP_DIRECT	GO:0045937~positive regulation of phosphate metabolic process	1	0.135501	1	FLT3	681	7	19734	4.13971	1	1	1
GOTERM_BP_DIRECT	GO:2000510~positive regulation of dendritic cell chemotaxis	1	0.135501	1	CALR	681	8	19734	3.62225	1	1	1
GOTERM_BP_DIRECT	GO:0018230~peptidyl-L-cysteine S-palmitoylation	1	0.135501	1	ZDHHC19	681	23	19734	1.25991	1	1	1
GOTERM_BP_DIRECT	GO:0022612~gland morphogenesis	1	0.135501	1	BCL2	681	7	19734	4.13971	1	1	1
GOTERM_BP_DIRECT	GO:0050482~arachidonic acid secretion	1	0.135501	1	LHCGR	681	27	19734	1.07326	1	1	1
GOTERM_BP_DIRECT	GO:1904845~cellular response to L-glutamine	1	0.135501	1	CYBB	681	2	19734	14.489	1	1	1
GOTERM_BP_DIRECT	GO:0051355~proprioception involved in equilibrioception	1	0.135501	1	POU4F1	681	1	19734	28.978	1	1	1
GOTERM_BP_DIRECT	GO:0006465~signal peptide processing	1	0.135501	1	IMMP2L	681	14	19734	2.06986	1	1	1
GOTERM_BP_DIRECT	GO:0043372~positive regulation of CD4-positive, alpha-beta T cell differentiation	1	0.135501	1	CD83	681	6	19734	4.82966	1	1	1
GOTERM_BP_DIRECT	GO:0060263~regulation of respiratory burst	1	0.135501	1	RAC2	681	5	19734	5.79559	1	1	1
GOTERM_BP_DIRECT	GO:0038007~netrin-activated signaling pathway	1	0.135501	1	PTK2	681	9	19734	3.21977	1	1	1
GOTERM_BP_DIRECT	GO:0070668~positive regulation of mast cell proliferation	1	0.135501	1	RAC2	681	6	19734	4.82966	1	1	1
GOTERM_BP_DIRECT	GO:1903527~positive regulation of membrane tubulation	1	0.135501	1	ATP10A	681	3	19734	9.65932	1	1	1
GOTERM_BP_DIRECT	GO:1905150~regulation of voltage-gated sodium channel activity	1	0.135501	1	FGF12	681	5	19734	5.79559	1	1	1
GOTERM_BP_DIRECT	GO:0016239~positive regulation of macroautophagy	1	0.135501	1	GPSM1	681	31	19734	0.934773	1	1	1
GOTERM_BP_DIRECT	GO:2000588~positive regulation of platelet-derived growth factor receptor-beta signaling pathway	1	0.135501	1	SRC	681	3	19734	9.65932	1	1	1
GOTERM_BP_DIRECT	GO:1900029~positive regulation of ruffle assembly	1	0.135501	1	COBL	681	17	19734	1.70459	1	1	1
GOTERM_BP_DIRECT	GO:0046886~positive regulation of hormone biosynthetic process	1	0.135501	1	LHCGR	681	4	19734	7.24449	1	1	1
GOTERM_BP_DIRECT	GO:0001957~intramembranous ossification	1	0.135501	1	MN1	681	7	19734	4.13971	1	1	1
GOTERM_BP_DIRECT	GO:0034626~fatty acid elongation, polyunsaturated fatty acid	1	0.135501	1	ELOVL3	681	7	19734	4.13971	1	1	1
GOTERM_BP_DIRECT	GO:0043315~positive regulation of neutrophil degranulation	1	0.135501	1	ITGAM	681	4	19734	7.24449	1	1	1
GOTERM_BP_DIRECT	GO:0044727~epigenetic programing of male pronucleus	1	0.135501	1	MORC1	681	6	19734	4.82966	1	1	1
GOTERM_BP_DIRECT	GO:0097421~liver regeneration	1	0.135501	1	IL6	681	31	19734	0.934773	1	1	1
GOTERM_BP_DIRECT	GO:0009435~NAD biosynthetic process	1	0.135501	1	NAMPT	681	11	19734	2.63436	1	1	1
GOTERM_BP_DIRECT	GO:0021510~spinal cord development	1	0.135501	1	VIT	681	27	19734	1.07326	1	1	1
GOTERM_BP_DIRECT	GO:1900229~negative regulation of single-species biofilm formation in or on host organism	1	0.135501	1	LTF	681	2	19734	14.489	1	1	1
GOTERM_BP_DIRECT	GO:0048240~sperm capacitation	1	0.135501	1	ROPN1B	681	28	19734	1.03493	1	1	1
GOTERM_BP_DIRECT	GO:0007060~male meiosis chromosome segregation	1	0.135501	1	MEIKIN	681	3	19734	9.65932	1	1	1
GOTERM_BP_DIRECT	GO:0042129~regulation of T cell proliferation	1	0.135501	1	RAC2	681	16	19734	1.81112	1	1	1
GOTERM_BP_DIRECT	GO:0034983~peptidyl-lysine deacetylation	1	0.135501	1	HDAC9	681	6	19734	4.82966	1	1	1
GOTERM_BP_DIRECT	GO:0035505~positive regulation of myosin light chain kinase activity	1	0.135501	1	IL1B	681	2	19734	14.489	1	1	1
GOTERM_BP_DIRECT	GO:0051970~negative regulation of transmission of nerve impulse	1	0.135501	1	AVPR1A	681	5	19734	5.79559	1	1	1
GOTERM_BP_DIRECT	GO:1903514~release of sequestered calcium ion into cytosol by endoplasmic reticulum	1	0.135501	1	ITPR1	681	2	19734	14.489	1	1	1
GOTERM_BP_DIRECT	GO:0050798~activated T cell proliferation	1	0.135501	1	FYN	681	9	19734	3.21977	1	1	1
GOTERM_BP_DIRECT	GO:0090103~cochlea morphogenesis	1	0.135501	1	GLI2	681	26	19734	1.11454	1	1	1
GOTERM_BP_DIRECT	GO:0002040~sprouting angiogenesis	1	0.135501	1	ANGPT1	681	36	19734	0.804944	1	1	1
GOTERM_BP_DIRECT	GO:0002314~germinal center B cell differentiation	1	0.135501	1	IL6	681	8	19734	3.62225	1	1	1
GOTERM_BP_DIRECT	GO:0003015~heart process	1	0.135501	1	FYN	681	7	19734	4.13971	1	1	1
GOTERM_BP_DIRECT	GO:0006888~endoplasmic reticulum to Golgi vesicle-mediated transport	1	0.135501	1	P4HB	681	131	19734	0.221206	1	1	1
GOTERM_BP_DIRECT	GO:0021694~cerebellar Purkinje cell layer formation	1	0.135501	1	GBA1	681	2	19734	14.489	1	1	1
GOTERM_BP_DIRECT	GO:0043304~regulation of mast cell degranulation	1	0.135501	1	RAC2	681	11	19734	2.63436	1	1	1
GOTERM_BP_DIRECT	GO:0045851~pH reduction	1	0.135501	1	SLC4A3	681	6	19734	4.82966	1	1	1
GOTERM_BP_DIRECT	GO:0098908~regulation of neuronal action potential	1	0.135501	1	FGF12	681	5	19734	5.79559	1	1	1
GOTERM_BP_DIRECT	GO:0006873~intracellular monoatomic ion homeostasis	1	0.135501	1	P2RY2	681	4	19734	7.24449	1	1	1
GOTERM_BP_DIRECT	GO:0033108~mitochondrial respiratory chain complex assembly	1	0.135501	1	IMMP2L	681	7	19734	4.13971	1	1	1
GOTERM_BP_DIRECT	GO:1905605~positive regulation of blood-brain barrier permeability	1	0.135501	1	ANGPT1	681	6	19734	4.82966	1	1	1
GOTERM_BP_DIRECT	GO:0051208~sequestering of calcium ion	1	0.135501	1	CALR	681	5	19734	5.79559	1	1	1
GOTERM_BP_DIRECT	GO:0006808~regulation of nitrogen utilization	1	0.135501	1	BCL2	681	2	19734	14.489	1	1	1
GOTERM_BP_DIRECT	GO:0031115~negative regulation of microtubule polymerization	1	0.135501	1	SNCA	681	13	19734	2.22907	1	1	1
GOTERM_BP_DIRECT	GO:0030030~cell projection organization	1	0.135501	1	CCDC61	681	51	19734	0.568196	1	1	1
GOTERM_BP_DIRECT	GO:0071420~cellular response to histamine	1	0.135501	1	HRH1	681	6	19734	4.82966	1	1	1
GOTERM_BP_DIRECT	GO:0021536~diencephalon development	1	0.135501	1	SEMA5A	681	2	19734	14.489	1	1	1
GOTERM_BP_DIRECT	GO:0002077~acrosome matrix dispersal	1	0.135501	1	ACR	681	1	19734	28.978	1	1	1
GOTERM_BP_DIRECT	GO:0097623~potassium ion export across plasma membrane	1	0.135501	1	KCNA5	681	16	19734	1.81112	1	1	1
GOTERM_BP_DIRECT	GO:0048814~regulation of dendrite morphogenesis	1	0.135501	1	TNIK	681	22	19734	1.31718	1	1	1
GOTERM_BP_DIRECT	GO:0043616~keratinocyte proliferation	1	0.135501	1	CD109	681	27	19734	1.07326	1	1	1
GOTERM_BP_DIRECT	GO:0006583~melanin biosynthetic process from tyrosine	1	0.135501	1	OCA2	681	4	19734	7.24449	1	1	1
GOTERM_BP_DIRECT	GO:0060044~negative regulation of cardiac muscle cell proliferation	1	0.135501	1	JARID2	681	16	19734	1.81112	1	1	1
GOTERM_BP_DIRECT	GO:2001137~positive regulation of endocytic recycling	1	0.135501	1	EHD2	681	6	19734	4.82966	1	1	1
GOTERM_BP_DIRECT	GO:0021904~dorsal/ventral neural tube patterning	1	0.135501	1	RNF220	681	11	19734	2.63436	1	1	1
GOTERM_BP_DIRECT	GO:0043950~positive regulation of cAMP-mediated signaling	1	0.135501	1	SCT	681	10	19734	2.8978	1	1	1
GOTERM_BP_DIRECT	GO:0051701~biological process involved in interaction with host	1	0.135501	1	PGLYRP1	681	3	19734	9.65932	1	1	1
GOTERM_BP_DIRECT	GO:0002687~positive regulation of leukocyte migration	1	0.135501	1	TACR1	681	16	19734	1.81112	1	1	1
GOTERM_BP_DIRECT	GO:0042551~neuron maturation	1	0.135501	1	BCL2	681	16	19734	1.81112	1	1	1
GOTERM_BP_DIRECT	GO:0051764~actin crosslink formation	1	0.135501	1	DPYSL3	681	14	19734	2.06986	1	1	1
GOTERM_BP_DIRECT	GO:2000117~negative regulation of cysteine-type endopeptidase activity	1	0.135501	1	LTF	681	9	19734	3.21977	1	1	1
GOTERM_BP_DIRECT	GO:0032765~positive regulation of mast cell cytokine production	1	0.135501	1	NR4A3	681	4	19734	7.24449	1	1	1
GOTERM_BP_DIRECT	GO:0060028~convergent extension involved in axis elongation	1	0.135501	1	SFRP2	681	4	19734	7.24449	1	1	1
GOTERM_BP_DIRECT	GO:0001656~metanephros development	1	0.135501	1	BCL2	681	30	19734	0.965932	1	1	1
GOTERM_BP_DIRECT	GO:1902260~negative regulation of delayed rectifier potassium channel activity	1	0.135501	1	ANK3	681	11	19734	2.63436	1	1	1
GOTERM_BP_DIRECT	GO:0010734~negative regulation of protein glutathionylation	1	0.135501	1	G6PD	681	2	19734	14.489	1	1	1
GOTERM_BP_DIRECT	GO:0061051~positive regulation of cell growth involved in cardiac muscle cell development	1	0.135501	1	AKAP6	681	8	19734	3.62225	1	1	1
GOTERM_BP_DIRECT	GO:0042311~vasodilation	1	0.135501	1	KNG1	681	45	19734	0.643955	1	1	1
GOTERM_BP_DIRECT	GO:0090091~positive regulation of extracellular matrix disassembly	1	0.135501	1	IL6	681	8	19734	3.62225	1	1	1
GOTERM_BP_DIRECT	GO:0032780~negative regulation of ATP-dependent activity	1	0.135501	1	LTF	681	13	19734	2.22907	1	1	1
GOTERM_BP_DIRECT	GO:0042473~outer ear morphogenesis	1	0.135501	1	FGFR1	681	9	19734	3.21977	1	1	1
GOTERM_BP_DIRECT	GO:0002051~osteoblast fate commitment	1	0.135501	1	SMAD1	681	3	19734	9.65932	1	1	1
GOTERM_BP_DIRECT	GO:0046314~phosphocreatine biosynthetic process	1	0.135501	1	CKB	681	5	19734	5.79559	1	1	1
GOTERM_BP_DIRECT	GO:0009313~oligosaccharide catabolic process	1	0.135501	1	NEU4	681	12	19734	2.41483	1	1	1
GOTERM_BP_DIRECT	GO:0071398~cellular response to fatty acid	1	0.135501	1	SRC	681	23	19734	1.25991	1	1	1
GOTERM_BP_DIRECT	GO:0018149~peptide cross-linking	1	0.135501	1	CSTA	681	27	19734	1.07326	1	1	1
GOTERM_BP_DIRECT	GO:0086016~AV node cell action potential	1	0.135501	1	SCN4B	681	4	19734	7.24449	1	1	1
GOTERM_BP_DIRECT	GO:0010641~positive regulation of platelet-derived growth factor receptor signaling pathway	1	0.135501	1	F7	681	3	19734	9.65932	1	1	1
GOTERM_BP_DIRECT	GO:1904628~cellular response to phorbol 13-acetate 12-myristate	1	0.135501	1	PRKD1	681	10	19734	2.8978	1	1	1
GOTERM_BP_DIRECT	GO:0045639~positive regulation of myeloid cell differentiation	1	0.135501	1	HOXA5	681	4	19734	7.24449	1	1	1
GOTERM_BP_DIRECT	GO:0035313~wound healing, spreading of epidermal cells	1	0.135501	1	HBEGF	681	16	19734	1.81112	1	1	1
GOTERM_BP_DIRECT	GO:0022604~regulation of cell morphogenesis	1	0.135501	1	EFNA5	681	24	19734	1.20742	1	1	1
GOTERM_BP_DIRECT	GO:0061458~reproductive system development	1	0.135501	1	PLEKHA5	681	5	19734	5.79559	1	1	1
GOTERM_BP_DIRECT	GO:0040018~positive regulation of multicellular organism growth	1	0.135501	1	BCL2	681	36	19734	0.804944	1	1	1
GOTERM_BP_DIRECT	GO:0043029~T cell homeostasis	1	0.135501	1	BCL2	681	38	19734	0.762578	1	1	1
GOTERM_BP_DIRECT	GO:0001866~NK T cell proliferation	1	0.135501	1	IL15	681	2	19734	14.489	1	1	1
GOTERM_BP_DIRECT	GO:0048935~peripheral nervous system neuron development	1	0.135501	1	POU4F1	681	11	19734	2.63436	1	1	1
GOTERM_BP_DIRECT	GO:0071305~cellular response to vitamin D	1	0.135501	1	SFRP1	681	11	19734	2.63436	1	1	1
GOTERM_BP_DIRECT	GO:0009051~pentose-phosphate shunt, oxidative branch	1	0.135501	1	G6PD	681	4	19734	7.24449	1	1	1
GOTERM_BP_DIRECT	GO:0098909~regulation of cardiac muscle cell action potential involved in regulation of contraction	1	0.135501	1	CAV3	681	8	19734	3.62225	1	1	1
GOTERM_BP_DIRECT	GO:0042908~xenobiotic transport	1	0.135501	1	ABCC1	681	26	19734	1.11454	1	1	1
GOTERM_BP_DIRECT	GO:0051001~negative regulation of nitric-oxide synthase activity	1	0.135501	1	CAV3	681	8	19734	3.62225	1	1	1
GOTERM_BP_DIRECT	GO:0010824~regulation of centrosome duplication	1	0.135501	1	PKHD1	681	22	19734	1.31718	1	1	1
GOTERM_BP_DIRECT	GO:2000672~negative regulation of motor neuron apoptotic process	1	0.135501	1	BCL2	681	11	19734	2.63436	1	1	1
GOTERM_BP_DIRECT	GO:0042700~luteinizing hormone signaling pathway	1	0.135501	1	LHCGR	681	2	19734	14.489	1	1	1
GOTERM_BP_DIRECT	GO:0034755~iron ion transmembrane transport	1	0.135501	1	SLC40A1	681	11	19734	2.63436	1	1	1
GOTERM_BP_DIRECT	GO:0045636~positive regulation of melanocyte differentiation	1	0.135501	1	BCL2	681	5	19734	5.79559	1	1	1
GOTERM_BP_DIRECT	GO:1903061~positive regulation of protein lipidation	1	0.135501	1	GBA1	681	4	19734	7.24449	1	1	1
GOTERM_BP_DIRECT	GO:1902459~positive regulation of stem cell population maintenance	1	0.135501	1	BCL7A	681	47	19734	0.616553	1	1	1
GOTERM_BP_DIRECT	GO:0062100~positive regulation of programmed necrotic cell death	1	0.135501	1	TSPO	681	4	19734	7.24449	1	1	1
GOTERM_BP_DIRECT	GO:0007213~G protein-coupled acetylcholine receptor signaling pathway	1	0.135501	1	PLCB1	681	15	19734	1.93186	1	1	1
GOTERM_BP_DIRECT	GO:0030185~nitric oxide transport	1	0.135501	1	HBA1	681	5	19734	5.79559	1	1	1
GOTERM_BP_DIRECT	GO:0021773~striatal medium spiny neuron differentiation	1	0.135501	1	SHANK3	681	4	19734	7.24449	1	1	1
GOTERM_BP_DIRECT	GO:0035543~positive regulation of SNARE complex assembly	1	0.135501	1	SNCA	681	1	19734	28.978	1	1	1
GOTERM_BP_DIRECT	GO:2000386~positive regulation of ovarian follicle development	1	0.135501	1	SRC	681	2	19734	14.489	1	1	1
GOTERM_BP_DIRECT	GO:0006518~peptide metabolic process	1	0.135501	1	AEBP1	681	16	19734	1.81112	1	1	1
GOTERM_BP_DIRECT	GO:0006412~translation	1	0.135501	1	IGF2BP3	681	202	19734	0.143455	1	1	1
GOTERM_BP_DIRECT	GO:0009097~isoleucine biosynthetic process	1	0.135501	1	SDS	681	3	19734	9.65932	1	1	1
GOTERM_BP_DIRECT	GO:0007616~long-term memory	1	0.135501	1	TACR1	681	40	19734	0.724449	1	1	1
GOTERM_BP_DIRECT	GO:0002437~inflammatory response to antigenic stimulus	1	0.135501	1	HLA-DRB1	681	27	19734	1.07326	1	1	1
GOTERM_BP_DIRECT	GO:0097401~synaptic vesicle lumen acidification	1	0.135501	1	ATP6V0A4	681	17	19734	1.70459	1	1	1
GOTERM_BP_DIRECT	GO:0051170~import into nucleus	1	0.135501	1	BACH2	681	5	19734	5.79559	1	1	1
GOTERM_BP_DIRECT	GO:0001959~regulation of cytokine-mediated signaling pathway	1	0.135501	1	CD24	681	3	19734	9.65932	1	1	1
GOTERM_BP_DIRECT	GO:0043586~tongue development	1	0.135501	1	BNC2	681	10	19734	2.8978	1	1	1
GOTERM_BP_DIRECT	GO:0061520~Langerhans cell differentiation	1	0.135501	1	ITGB8	681	4	19734	7.24449	1	1	1
GOTERM_BP_DIRECT	GO:0072207~metanephric epithelium development	1	0.135501	1	WT1	681	5	19734	5.79559	1	1	1
GOTERM_BP_DIRECT	GO:1904637~cellular response to ionomycin	1	0.135501	1	PLCB1	681	4	19734	7.24449	1	1	1
GOTERM_BP_DIRECT	GO:0060466~activation of meiosis involved in egg activation	1	0.135501	1	PLCB1	681	2	19734	14.489	1	1	1
GOTERM_BP_DIRECT	GO:0060535~trachea cartilage morphogenesis	1	0.135501	1	HOXA5	681	3	19734	9.65932	1	1	1
GOTERM_BP_DIRECT	GO:0060683~regulation of branching involved in salivary gland morphogenesis by epithelial-mesenchymal signaling	1	0.135501	1	PDGFA	681	1	19734	28.978	1	1	1
GOTERM_BP_DIRECT	GO:0010659~cardiac muscle cell apoptotic process	1	0.135501	1	SFRP2	681	12	19734	2.41483	1	1	1
GOTERM_BP_DIRECT	GO:0045836~positive regulation of meiotic nuclear division	1	0.135501	1	NPM2	681	6	19734	4.82966	1	1	1
GOTERM_BP_DIRECT	GO:0071391~cellular response to estrogen stimulus	1	0.135501	1	SFRP1	681	21	19734	1.3799	1	1	1
GOTERM_BP_DIRECT	GO:0097029~mature conventional dendritic cell differentiation	1	0.135501	1	PRTN3	681	4	19734	7.24449	1	1	1
GOTERM_BP_DIRECT	GO:0043163~cell envelope organization	1	0.135501	1	HRNR	681	2	19734	14.489	1	1	1
GOTERM_BP_DIRECT	GO:0046671~negative regulation of retinal cell programmed cell death	1	0.135501	1	BCL2	681	3	19734	9.65932	1	1	1
GOTERM_BP_DIRECT	GO:0140459~response to Gram-positive bacterium	1	0.135501	1	ITGAM	681	6	19734	4.82966	1	1	1
GOTERM_BP_DIRECT	GO:0042866~pyruvate biosynthetic process	1	0.135501	1	SDS	681	4	19734	7.24449	1	1	1
GOTERM_BP_DIRECT	GO:0045760~positive regulation of action potential	1	0.135501	1	TACR1	681	6	19734	4.82966	1	1	1
GOTERM_BP_DIRECT	GO:1902680~positive regulation of RNA biosynthetic process	1	0.135501	1	IL1B	681	2	19734	14.489	1	1	1
GOTERM_BP_DIRECT	GO:0010224~response to UV-B	1	0.135501	1	BCL2	681	9	19734	3.21977	1	1	1
GOTERM_BP_DIRECT	GO:0002467~germinal center formation	1	0.135501	1	MEF2C	681	10	19734	2.8978	1	1	1
GOTERM_BP_DIRECT	GO:0003095~pressure natriuresis	1	0.135501	1	CYP4F3	681	5	19734	5.79559	1	1	1
GOTERM_BP_DIRECT	GO:0009750~response to fructose	1	0.135501	1	PTGS2	681	6	19734	4.82966	1	1	1
GOTERM_BP_DIRECT	GO:0032735~positive regulation of interleukin-12 production	1	0.135501	1	PLCB1	681	44	19734	0.65859	1	1	1
GOTERM_BP_DIRECT	GO:0050974~detection of mechanical stimulus involved in sensory perception	1	0.135501	1	PIEZO2	681	5	19734	5.79559	1	1	1
GOTERM_BP_DIRECT	GO:0070946~neutrophil-mediated killing of gram-positive bacterium	1	0.135501	1	CTSG	681	2	19734	14.489	1	1	1
GOTERM_BP_DIRECT	GO:0032673~regulation of interleukin-4 production	1	0.135501	1	HLA-DRB1	681	1	19734	28.978	1	1	1
GOTERM_BP_DIRECT	GO:0045577~regulation of B cell differentiation	1	0.135501	1	CARD11	681	12	19734	2.41483	1	1	1
GOTERM_BP_DIRECT	GO:0032913~negative regulation of transforming growth factor beta3 production	1	0.135501	1	CD24	681	1	19734	28.978	1	1	1
GOTERM_BP_DIRECT	GO:0003158~endothelium development	1	0.135501	1	SLC40A1	681	11	19734	2.63436	1	1	1
GOTERM_BP_DIRECT	GO:2000446~regulation of macrophage migration inhibitory factor signaling pathway	1	0.135501	1	ANGPT1	681	1	19734	28.978	1	1	1
GOTERM_BP_DIRECT	GO:0010694~positive regulation of alkaline phosphatase activity	1	0.135501	1	MEF2C	681	2	19734	14.489	1	1	1
GOTERM_BP_DIRECT	GO:0061870~positive regulation of hepatic stellate cell migration	1	0.135501	1	AKAP12	681	2	19734	14.489	1	1	1
GOTERM_BP_DIRECT	GO:0099039~sphingolipid translocation	1	0.135501	1	ABCC1	681	2	19734	14.489	1	1	1
GOTERM_BP_DIRECT	GO:0070434~positive regulation of nucleotide-binding oligomerization domain containing 2 signaling pathway	1	0.135501	1	HSPA1A	681	6	19734	4.82966	1	1	1
GOTERM_BP_DIRECT	GO:0002318~myeloid progenitor cell differentiation	1	0.135501	1	FLT3	681	7	19734	4.13971	1	1	1
GOTERM_BP_DIRECT	GO:0001706~endoderm formation	1	0.135501	1	DUSP5	681	13	19734	2.22907	1	1	1
GOTERM_BP_DIRECT	GO:2000573~positive regulation of DNA biosynthetic process	1	0.135501	1	HGF	681	17	19734	1.70459	1	1	1
GOTERM_BP_DIRECT	GO:0001757~somite specification	1	0.135501	1	COBL	681	5	19734	5.79559	1	1	1
GOTERM_BP_DIRECT	GO:0021740~principal sensory nucleus of trigeminal nerve development	1	0.135501	1	KIRREL3	681	4	19734	7.24449	1	1	1
GOTERM_BP_DIRECT	GO:0050923~regulation of negative chemotaxis	1	0.135501	1	PLXNA4	681	1	19734	28.978	1	1	1
GOTERM_BP_DIRECT	GO:0003416~endochondral bone growth	1	0.135501	1	BNC2	681	9	19734	3.21977	1	1	1
GOTERM_BP_DIRECT	GO:0030001~metal ion transport	1	0.135501	1	SLC41A2	681	12	19734	2.41483	1	1	1
GOTERM_BP_DIRECT	GO:0050849~negative regulation of calcium-mediated signaling	1	0.135501	1	ITPR1	681	6	19734	4.82966	1	1	1
GOTERM_BP_DIRECT	GO:0071577~zinc ion transmembrane transport	1	0.135501	1	SLC30A8	681	24	19734	1.20742	1	1	1
GOTERM_BP_DIRECT	GO:0002043~blood vessel endothelial cell proliferation involved in sprouting angiogenesis	1	0.135501	1	SEMA5A	681	7	19734	4.13971	1	1	1
GOTERM_BP_DIRECT	GO:0036101~leukotriene B4 catabolic process	1	0.135501	1	CYP4F3	681	4	19734	7.24449	1	1	1
GOTERM_BP_DIRECT	GO:0072711~cellular response to hydroxyurea	1	0.135501	1	DDI1	681	11	19734	2.63436	1	1	1
GOTERM_BP_DIRECT	GO:0021940~positive regulation of cerebellar granule cell precursor proliferation	1	0.135501	1	EGF	681	4	19734	7.24449	1	1	1
GOTERM_BP_DIRECT	GO:2000147~positive regulation of cell motility	1	0.135501	1	CAVIN1	681	24	19734	1.20742	1	1	1
GOTERM_BP_DIRECT	GO:1990646~cellular response to prolactin	1	0.135501	1	SRC	681	2	19734	14.489	1	1	1
GOTERM_BP_DIRECT	GO:0010523~negative regulation of calcium ion transport into cytosol	1	0.135501	1	BCL2	681	5	19734	5.79559	1	1	1
GOTERM_BP_DIRECT	GO:0030034~microvillar actin bundle assembly	1	0.135501	1	ESPN	681	1	19734	28.978	1	1	1
GOTERM_BP_DIRECT	GO:0071872~cellular response to epinephrine stimulus	1	0.135501	1	SNCA	681	13	19734	2.22907	1	1	1
GOTERM_BP_DIRECT	GO:0007029~endoplasmic reticulum organization	1	0.135501	1	TMEM38A	681	41	19734	0.70678	1	1	1
GOTERM_BP_DIRECT	GO:0050765~negative regulation of phagocytosis	1	0.135501	1	PRTN3	681	19	19734	1.52516	1	1	1
GOTERM_BP_DIRECT	GO:0050810~regulation of steroid biosynthetic process	1	0.135501	1	TSPO	681	10	19734	2.8978	1	1	1
GOTERM_BP_DIRECT	GO:1990256~signal clustering	1	0.135501	1	SEMA5A	681	1	19734	28.978	1	1	1
GOTERM_BP_DIRECT	GO:0060426~lung vasculature development	1	0.135501	1	LIF	681	9	19734	3.21977	1	1	1
GOTERM_BP_DIRECT	GO:1900825~regulation of membrane depolarization during cardiac muscle cell action potential	1	0.135501	1	CAV3	681	3	19734	9.65932	1	1	1
GOTERM_BP_DIRECT	GO:0098629~trans-Golgi network membrane organization	1	0.135501	1	AZIN2	681	2	19734	14.489	1	1	1
GOTERM_BP_DIRECT	GO:0042942~D-serine transmembrane transport	1	0.135501	1	SLC7A10	681	2	19734	14.489	1	1	1
GOTERM_BP_DIRECT	GO:0090024~negative regulation of neutrophil chemotaxis	1	0.135501	1	DPP4	681	5	19734	5.79559	1	1	1
GOTERM_BP_DIRECT	GO:0097254~renal tubular secretion	1	0.135501	1	ATP6V0A4	681	3	19734	9.65932	1	1	1
[truncated: 1,070 more rows]

## Sheet: GO_CC padj<0.05
Category	Term	Count	%	PValue	Genes	List Total	Pop Hits	Pop Total	Fold Enrichment	Bonferroni	Benjamini	FDR
GOTERM_CC_DIRECT	GO:0005886~plasma membrane	308	41.7344	3.0171e-23	FRMPD3, SLC4A3, CLDN2, NIPAL4, GPR173, HTR7, PIEZO2, VSTM1, CPNE3, SLC12A7, EPHB1, ICOSLG, CALN1, ACVR1, CUBN, TMEM88B, PRKCH, MUSK, DAPK1, KCNK12, PRKCE, TAS2R13, ADGRA3, ANK3, PDYN, SYTL4, SFRP1, ASTL, CD109, PSG6, ANOS1, TRIB3, PRKCQ, PRKD1, TSHZ3, TAS2R46, LPAR3, CD1E, FPR2, NEU4, FLRT1, S100A12, TSPAN5, GSG1L, ATP6V0A4, PROM1, HLA-DQA1, SLC10A4, CARMIL1, HLA-DRB5, GPR15, SIGLEC14, YES1, GRIN…	703	5592	20887	1.63646	1.47234e-20	1.47234e-20	1.39993e-20
GOTERM_CC_DIRECT	GO:0005576~extracellular region	121	16.3957	3.89695e-09	VIT, CDA, SCT, HP, ISM1, MPO, FGF9, IGLON5, LIPM, PGLYRP1, PRSS2, EPHB1, KIRREL3, HGF, CLEC11A, RNASE3, PDYN, OLFM4, RNASE2, TUBA4A, SFRP1, SLPI, CD109, PSG6, ANOS1, PRTN3, S100A9, S100A8, COL17A1, HTRA4, PDGFA, LPO, AEBP1, KNG1, DPP4, ADAMTS16, PDZD2, S100A12, PLTP, S100A11, ELANE, RNASE11, COL24A1, DEFA4, MUC19, LIF, GGH, AZU1, ARPC5, LYZ, HRNR, ACR, FGF17, IL6, IL5, PROC, TCN1, CALR, FGFR1, GP…	703	2101	20887	1.71112	1.90171e-06	6.70122e-07	6.37165e-07
GOTERM_CC_DIRECT	GO:0005615~extracellular space	118	15.9892	4.1196e-09	SCT, HP, CXCL17, GBA1, METRNL, MPO, FGF9, DPYSL3, NAMPT, VSTM1, PGLYRP1, PRSS2, LHCGR, HGF, CLEC11A, RNASE3, OLFM4, RNASE2, SFRP1, SFRP2, OBSCN, SLPI, CD109, ANOS1, PRTN3, S100A9, S100A8, FREM3, COL17A1, TACSTD2, PDGFA, CD1E, LPO, AEBP1, KNG1, FLRT1, S100A12, PROM1, PLTP, S100A11, ELANE, COL24A1, LRRN3, DEFA4, LIF, GGH, SSC5D, AZU1, LYZ, FGF17, IL6, IL5, PROC, TCN1, SERPINI2, CALR, FGF12, HLA-DRB…	703	2033	20887	1.72451	2.01036e-06	6.70122e-07	6.37165e-07
GOTERM_CC_DIRECT	GO:0035580~specific granule lumen	15	2.03252	1.67946e-08	AOC1, DEFA4, HP, GGH, OLFM4, LYZ, MMP8, SLPI, TCN1, QPCT, BPI, FOLR3, PGLYRP1, ELANE, LTF	703	63	20887	7.0741	8.19575e-06	2.04895e-06	1.94818e-06
GOTERM_CC_DIRECT	GO:0070062~extracellular exosome	121	16.3957	2.18915e-07	SEMA5A, CD86, HP, GBA1, METRNL, MPO, NAMPT, CPNE3, TMEM38A, PGLYRP1, EPHB1, ICOSLG, CUBN, G6PD, PRKCH, ACOT12, OLFM4, RNASE2, TUBA4A, ERMN, SULT2B1, SFRP1, SLPI, DAAM2, PRTN3, TNIK, S100A9, S100A8, CARD11, RAB5B, NPR3, TACSTD2, LPO, AEBP1, FUT2, KNG1, DPP4, PKHD1, CLTCL1, ATP6V0A4, PROM1, S100A11, ELANE, CARMIL1, HLA-DRB5, YES1, MUC16, GGH, AZU1, ARPC5, LYZ, HRNR, EHD2, MYO5C, SERPINI2, CALR, HLA…	703	2258	20887	1.59214	0.000106825	2.13661e-05	2.03153e-05
GOTERM_CC_DIRECT	GO:1904724~tertiary granule lumen	13	1.76152	2.72055e-07	CDA, HP, GGH, OLFM4, LYZ, MMP8, MMP9, TCN1, QPCT, ALDOC, FOLR3, PGLYRP1, LTF	703	56	20887	6.89725	0.000132754	2.21271e-05	2.10389e-05
GOTERM_CC_DIRECT	GO:0009986~cell surface	48	6.50407	1.02244e-06	CD86, CD63, CIITA, ITGAM, PDGFA, PCSK9, KCNA5, FUT4, DPP4, HLA-DMA, SRPX2, CLEC5A, FCER1A, ITGB8, CD59, GPC5, HAVCR1, PROM1, TNFRSF4, ELANE, HLA-DPA1, EGFL7, CAV3, TSPEAR, TACR1, ANK3, GRIN2B, ACVR2A, GRIN1, MAS1, SFRP1, CEACAM6, RTN4RL1, CEACAM5, CD109, IL1RAPL1, PSG6, ANOS1, HLA-DPB1, CEACAM8, CALR, CD24, RAMP1, HCST, HLA-DRB1, CD200, LTF, HBEGF	703	657	20887	2.17068	0.000498827	7.12787e-05	6.77732e-05
GOTERM_CC_DIRECT	GO:0062023~collagen-containing extracellular matrix	35	4.74255	1.21756e-06	COL17A1, SEMA7A, ANXA8L1, LAMA3, PZP, AEBP1, THBS4, KNG1, SRPX2, C1QTNF7, MMP28, ANXA8, GPC5, CTSG, ELANE, EGFL7, COL26A1, COL24A1, ANGPT1, SSC5D, MMP8, MMP9, HRNR, F7, SFRP1, PKM, SFRP2, MMRN1, SLPI, MFAP2, PRTN3, CALR, S100A9, S100A8, FREM3	703	408	20887	2.54876	0.000593994	7.42713e-05	7.06186e-05
GOTERM_CC_DIRECT	GO:0035578~azurophil granule lumen	14	1.89702	1.07353e-05	GCA, GGH, RNASE3, AZU1, LYZ, RNASE2, MPO, HRNR, CTSG, MNDA, PRTN3, BPI, PRSS2, ELANE	703	91	20887	4.57096	0.00522518	0.000582094	0.000553467
GOTERM_CC_DIRECT	GO:0070821~tertiary granule membrane	11	1.49051	0.000158529	ITGAM, SIGLEC14, FRMPD3, STBD1, CLEC5A, CYBB, STOM, CD59, CEACAM8, FPR2, SIGLEC5	703	73	20887	4.47704	0.0744512	0.00773623	0.00735576
GOTERM_CC_DIRECT	GO:0042613~MHC class II protein complex	7	0.948509	0.000182643	HLA-DMA, HLA-DRB5, HLA-DPB1, HLA-DOA, HLA-DRB1, HLA-DQA1, HLA-DPA1	703	26	20887	7.99918	0.0852805	0.0081027	0.00770421
GOTERM_CC_DIRECT	GO:0030658~transport vesicle membrane	8	1.08401	0.000527842	HLA-DRB5, SLC30A8, HLA-DPB1, ITPR1, SYTL4, HLA-DRB1, HLA-DQA1, HLA-DPA1	703	43	20887	5.52767	0.227138	0.0214656	0.0204099
GOTERM_CC_DIRECT	GO:0048471~perinuclear region of cytoplasm	44	5.96206	0.000644992	CHODL, TAMALIN, MS4A3, SRC, ITPR1, PTPRM, PCSK9, AKAP6, KCNA5, ATP2C2, SH3RF1, RASGRP3, PKHD1, RASD1, ZDHHC19, STBD1, FLRT1, MAEL, STOM, FYN, SNCA, PACSIN1, CALN1, PPP1R16B, PRKCE, COBL, AZIN2, OLFM4, CKAP4, PTK2, HRNR, DNM3, FOXR1, EHD2, GJB2, TPPP3, TRAF4, S100P, TNIK, PRKD1, PDE7B, CALR, PDE9A, HSPA1A	703	761	20887	1.71786	0.270107	0.024212	0.0230212
GOTERM_CC_DIRECT	GO:0030139~endocytic vesicle	9	1.21951	0.00195429	DPP4, CUBN, EHD2, RAB5B, CD207, AVPR1A, RAB17, DNM1, PIK3C2B	703	68	20887	3.93237	0.615045	0.0681211	0.0647709
GOTERM_CC_DIRECT	GO:0030669~clathrin-coated endocytic vesicle membrane	9	1.21951	0.0025765	HLA-DRB5, EPGN, EGF, CD207, HLA-DPB1, HLA-DRB1, HLA-DQA1, HLA-DPA1, HBEGF	703	71	20887	3.76621	0.71605	0.0838222	0.0796998
GOTERM_CC_DIRECT	GO:0005856~cytoskeleton	31	4.20054	0.00286278	EDA, FRMPD3, PDLIM1, AKAP12, TMSB4X, TRIM46, RAC2, S100A12, STOM, IGF2BP2, MARCKSL1, AUTS2, PRKCE, ANK3, ARHGAP26, GRIN2B, CKAP4, TUBA4A, PTK2, ERMN, TRAF4, PPP2R2B, KIF26B, TMSB15B, ITPKA, ALDOC, TNIK, P4HB, S100A9, S100A8, MSRB1	703	518	20887	1.77809	0.753166	0.0873147	0.0830205
GOTERM_CC_DIRECT	GO:0098978~glutamatergic synapse	27	3.65854	0.00320211	TAMALIN, GUCY1B1, SRC, LRRC4, ABHD17C, CPLX2, ARHGAP22, EFNB3, PSD2, GSG1L, DLGAP2, EPHB1, GUCY1A1, DAPK1, PLEKHA5, ATP2B1, DNM1, DNM3, TANC1, NRG3, IL1RAPL1, ITPKA, TNIK, RAB17, PLCB1, DOCK1, SHANK3	703	432	20887	1.85695	0.79094	0.0919193	0.0873987
GOTERM_CC_DIRECT	GO:0005925~focal adhesion	27	3.65854	0.00353887	BCAR3, SRC, ARHGAP22, DPP4, PDLIM1, MRC2, AKAP12, GNA12, FLRT1, TM4SF20, RAC2, ITGB8, CD59, FLNB, CPNE3, YES1, CAV3, RRAS2, SORBS1, ARPC5, ARHGAP26, PTK2, PPFIBP1, TRIM15, P4HB, CALR, HSPA1A	703	435	20887	1.84415	0.822721	0.0934851	0.0888875
GOTERM_CC_DIRECT	GO:0014069~postsynaptic density	18	2.43902	0.00380526	TAMALIN, RTN1, DAPK1, PLEKHA5, ITPR1, GRIN2B, INSYN2A, GRIN1, DNM3, IGSF11, TANC1, SIPA1L1, DNAJC6, BAALC, FYN, IGSF9B, DLGAP2, SHANK3	703	244	20887	2.19181	0.844406	0.0934851	0.0888875
GOTERM_CC_DIRECT	GO:0030425~dendrite	28	3.79404	0.00383136	RTN1, CYP46A1, CPLX2, HRH1, HTR7, PSD2, GRM7, DNER, FYN, N4BP3, EPHB1, GRIA4, KIRREL3, NEGR1, HTR1F, ANXA3, CYBB, COBL, AZIN2, TACR1, ANK3, PDYN, GRIN1, TANC1, IL1RAPL1, MAP1A, RAB17, KCNK1	703	460	20887	1.80851	0.846383	0.0934851	0.0888875
GOTERM_CC_DIRECT	GO:0045121~membrane raft	16	2.16802	0.00528798	CAVIN1, CAV3, ANGPT1, SRC, RFTN1, KCNA5, SORBS1, DPP4, MAG, RTN4RL1, STOM, BAALC, FYN, CD24, EPHB1, CARD11	703	211	20887	2.25298	0.924783	0.121012	0.11506
GOTERM_CC_DIRECT	GO:0009897~external side of plasma membrane	26	3.52304	0.00569853	CD86, SEMA7A, CD83, ITGAM, CD1E, ADAM20, EFNA5, SLC4A3, PKHD1, FCER1A, CD59, TNFRSF4, ICOSLG, DNAI2, GPR15, MUC16, MOG, ADGRA3, CD207, HLA-DPB1, PDCD1, P4HB, CALR, FOLR3, CD24, HLA-DRB1	703	429	20887	1.80068	0.938507	0.121012	0.11506
GOTERM_CC_DIRECT	GO:0034774~secretory granule lumen	11	1.49051	0.00575787	CDA, GPI, HK3, PKM, S100A12, ALDOC, S100P, ARPC5, S100A9, S100A8, S100A11	703	116	20887	2.81744	0.940272	0.121012	0.11506
GOTERM_CC_DIRECT	GO:0098553~lumenal side of endoplasmic reticulum membrane	6	0.813008	0.0059514	HLA-DRB5, HLA-DPB1, CALR, HLA-DRB1, HLA-DQA1, HLA-DPA1	703	35	20887	5.09336	0.945685	0.121012	0.11506
GOTERM_CC_DIRECT	GO:0043194~axon initial segment	5	0.677507	0.00673175	IQCJ-SCHIP1, SCHIP1, MAP1A, TRIM46, ANK3	703	23	20887	6.45896	0.962976	0.123517	0.117442
GOTERM_CC_DIRECT	GO:0016020~membrane	199	26.9648	0.00700502	SLC4A3, NIPAL4, GPR173, HTR7, PIEZO2, VSTM1, EPHB1, ICOSLG, ACVR1, CUBN, TAS2R13, ADGRA3, ANK3, INPP4B, PRKD1, NGEF, FREM3, TAS2R46, PDGFA, FPR2, NEU4, PCNX2, CHST11, TSPAN5, ST8SIA6, HLA-DQA1, HLA-DRB5, LRRN3, CYP4F3, AZU1, TMEM196, PTK2, EHD2, CYP2S1, MYO5C, CD207, NDUFAF2, TMCC2, DCHS1, CALR, IGSF9B, CD24, PRRT4, HLA-DRB1, CD200, CSRNP1, GPI, SLC35F3, LRRC4, PTPRM, PRKAG2, TMEM51, MS4A4E, DOC2…	703	5048	20887	1.17126	0.967629	0.123517	0.117442
GOTERM_CC_DIRECT	GO:0016529~sarcoplasmic reticulum	7	0.948509	0.0070254	RASD1, FKBP1C, ITPR1, AKAP6, S100P, ANK3, THBS4	703	51	20887	4.07801	0.967951	0.123517	0.117442
GOTERM_CC_DIRECT	GO:0043231~intracellular membrane-bounded organelle	46	6.23306	0.00708703	CD63, PHLDB1, RAB5B, EDA, ATP23, NLRC4, MSI2, MPO, PIK3C2B, ZNRF1, NEU4, HLA-DMA, RAB20, PDZD2, HSD17B2, BLNK, TSPO, HOXA2, CTSG, ICOSLG, RGS6, HLA-DPA1, G6PD, MEF2C, SLC30A8, CAVIN1, CAV3, SMOX, PRKCE, SFMBT2, CYP4F3, ATP2B1, AZU1, PTK2, SULT2B1, GPRC5A, KLF5, SLC9A7, DNAJC6, CYP2S1, SNAI1, PRTN3, MNDA, NANOG, CD24, KCNK1	703	915	20887	1.49368	0.968907	0.123517	0.117442
GOTERM_CC_DIRECT	GO:0031093~platelet alpha granule lumen	8	1.08401	0.00772243	SRGN, MMRN1, EGF, HGF, TMSB4X, PDGFA, KNG1, F5	703	68	20887	3.49544	0.97725	0.12995	0.123559
GOTERM_CC_DIRECT	GO:0005796~Golgi lumen	10	1.35501	0.0100164	F7, PROC, MUC16, DEFA4, MUC19, PDGFA, GPC5, MUC4, HS3ST1, MUC5AC	703	107	20887	2.77675	0.992647	0.160781	0.152874
GOTERM_CC_DIRECT	GO:0031838~haptoglobin-hemoglobin complex	4	0.542005	0.01043	HBG2, HBE1, HP, HBA1	703	14	20887	8.48893	0.994004	0.160781	0.152874
GOTERM_CC_DIRECT	GO:0097013~phagocytic vesicle lumen	3	0.406504	0.010543	PGLYRP1, MPO, LTF	703	5	20887	17.8267	0.994329	0.160781	0.152874
GOTERM_CC_DIRECT	GO:0035579~specific granule membrane	9	1.21951	0.0115069	ITGAM, MS4A3, CLEC5A, CYBB, STOM, CD59, CEACAM8, FPR2, CKAP4	703	91	20887	2.93847	0.996475	0.170163	0.161794
GOTERM_CC_DIRECT	GO:0031902~late endosome membrane	12	1.62602	0.0125959	CD63, HLA-DMA, HLA-DRB5, ANXA8L1, HLA-DPB1, ATP10B, ANXA8, HLA-DOA, TMEM163, HLA-DRB1, HLA-DQA1, HLA-DPA1	703	150	20887	2.3769	0.997942	0.180511	0.171634
GOTERM_CC_DIRECT	GO:0005901~caveola	8	1.08401	0.0129465	EHD2, CAVIN1, CAV3, SRC, AKAP6, KCNA5, EFNA5, PTGS2	703	75	20887	3.1692	0.998269	0.180511	0.171634
GOTERM_CC_DIRECT	GO:0035577~azurophil granule membrane	7	0.948509	0.0140443	CD63, CEACAM6, STOM, CPNE3, CEACAM8, AZU1, CKAP4	703	59	20887	3.52506	0.998994	0.190378	0.181015
GOTERM_CC_DIRECT	GO:0031088~platelet dense granule membrane	3	0.406504	0.0154642	ABCC4, CD63, ITPR1	703	6	20887	14.8556	0.999502	0.20396	0.193929
GOTERM_CC_DIRECT	GO:0043235~receptor complex	15	2.03252	0.0202818	ALK, CUBN, LHCGR, KCTD19, MUSK, FLT3, SRC, TIE1, LRP1B, ACVR2A, GPRC5A, P2RX3, GRM7, RAMP1, FGFR1	703	225	20887	1.98075	0.999955	0.260461	0.247652
GOTERM_CC_DIRECT	GO:0014704~intercalated disc	6	0.813008	0.0220081	OBSCN, CAV3, AKAP6, KCNA5, ANK3, SCN4B	703	48	20887	3.7139	0.999981	0.275383	0.261839
GOTERM_CC_DIRECT	GO:1904813~ficolin-1-rich granule lumen	10	1.35501	0.0252809	CDA, GPI, HK3, PKM, QPCT, ALDOC, MNDA, ARPC5, MMP9, HSPA1A	703	125	20887	2.3769	0.999996	0.307028	0.291928
GOTERM_CC_DIRECT	GO:0005938~cell cortex	12	1.62602	0.0257953	AKAP12, GPSM1, CLIP2, GRM7, COBL, FLNB, PRKD1, CYTIP, GNAI1, PTK2, ERMN, SNCA	703	167	20887	2.13494	0.999997	0.307028	0.291928
GOTERM_CC_DIRECT	GO:0043005~neuron projection	19	2.57453	0.029243	RTN1, CHRNA6, ANK3, STON2, PTGS2, POU4F1, GRIN2B, GRIN1, NEU4, SV2B, MAP1A, GNA12, RAC2, BAALC, IGSF9B, SHANK3, CD200, RGS6, PACSIN1	703	328	20887	1.72108	0.999999	0.339776	0.323065
GOTERM_CC_DIRECT	GO:0005788~endoplasmic reticulum lumen	18	2.43902	0.0344872	COL17A1, COL26A1, COLGALT2, SDF2L1, COL24A1, FLT3, PDGFA, PCSK9, PTGS2, KNG1, CKAP4, F5, F7, IL6, PROC, TSPAN5, P4HB, CALR	703	311	20887	1.71962	1	0.385023	0.366087
GOTERM_CC_DIRECT	GO:0098684~photoreceptor ribbon synapse	3	0.406504	0.0347152	ATP2B1, DNM1, PACSIN1	703	9	20887	9.90375	1	0.385023	0.366087
GOTERM_CC_DIRECT	GO:0032588~trans-Golgi network membrane	9	1.21951	0.0368252	HLA-DRB5, HTR7, CRACR2B, HLA-DPB1, ATP2C2, HLA-DRB1, HLA-DQA1, CALN1, HLA-DPA1	703	113	20887	2.36638	1	0.399349	0.379709
GOTERM_CC_DIRECT	GO:0030666~endocytic vesicle membrane	7	0.948509	0.038065	HLA-DRB5, HLA-DPB1, HLA-DRB1, HLA-DQA1, HLA-DPA1, GRIA4, HBEGF	703	74	20887	2.81052	1	0.40382	0.38396
GOTERM_CC_DIRECT	GO:0031982~vesicle	12	1.62602	0.0397836	F7, PKM, GPRC5A, MUC16, CAV3, DNAJC6, MYO5C, STOM, CD59, PROM1, MUC4, HSPA1A	703	179	20887	1.99181	1	0.413072	0.392757
GOTERM_CC_DIRECT	GO:0098552~side of membrane	9	1.21951	0.041971	NEGR1, CEACAM6, RTN4RL1, CEACAM5, CD109, GPC5, CD59, CEACAM8, DPEP3	703	116	20887	2.30518	1	0.41901	0.398403
GOTERM_CC_DIRECT	GO:0042582~azurophil granule	3	0.406504	0.0424438	DEFA4, AZU1, MPO	703	10	20887	8.91337	1	0.41901	0.398403
GOTERM_CC_DIRECT	GO:0030141~secretory granule	8	1.08401	0.0429313	SRGN, SLC30A8, IL1B, TFF3, CTSG, MPO, ELANE, LTF	703	96	20887	2.47594	1	0.41901	0.398403
GOTERM_CC_DIRECT	GO:0012507~ER to Golgi transport vesicle membrane	6	0.813008	0.0478249	HLA-DRB5, HLA-DPB1, CD59, HLA-DRB1, HLA-DQA1, HLA-DPA1	703	59	20887	3.02148	1	0.457619	0.435113
GOTERM_CC_DIRECT	GO:0044194~cytolytic granule	3	0.406504	0.0507432	SRGN, NKG7, CALR	703	11	20887	8.10306	1	0.467639	0.44464
GOTERM_CC_DIRECT	GO:0016328~lateral plasma membrane	8	1.08401	0.0515442	GJB2, ABCC1, GNA12, TACSTD2, SLC40A1, ANK3, ATP2B1, NKD2	703	100	20887	2.3769	1	0.467639	0.44464
GOTERM_CC_DIRECT	GO:0097060~synaptic membrane	5	0.677507	0.0517469	SRPX2, SRC, KCNK1, GRIN2B, GRIN1	703	42	20887	3.53705	1	0.467639	0.44464
GOTERM_CC_DIRECT	GO:0043025~neuronal cell body	20	2.71003	0.0539122	RTN1, NEGR1, MUSK, ANXA3, SRC, CYBB, COBL, PDYN, SNCAIP, ERMN, AKAP12, TANC1, PSD2, DNER, MAP1A, GNA12, RAB17, CD200, GRIA4, SNCA	703	378	20887	1.57202	1	0.478348	0.454823
GOTERM_CC_DIRECT	GO:0045202~synapse	25	3.38753	0.0564637	CHRNA6, LPAR3, DOC2B, RASD2, HRH1, SRPX2, HTR7, CHN2, DPYSL3, PHACTR1, EMB, SLC12A7, PACSIN1, MUSK, HTR1F, PRKCE, TDRD5, DNM1, GRIN1, DNM3, MAP1A, PLP1, PDE7B, FGF12, SDK2	703	505	20887	1.47085	1	0.488396	0.464377
GOTERM_CC_DIRECT	GO:0031526~brush border membrane	6	0.813008	0.0570463	SLC22A12, CUBN, GNA12, ATP6V0A4, KCNK1, SLC28A3	703	62	20887	2.87528	1	0.488396	0.464377
GOTERM_CC_DIRECT	GO:0005768~endosome	18	2.43902	0.0583446	CUBN, LHCGR, RAB5B, GPR15, CALCRL, AVPR1B, IL15, RFTN1, PCSK9, AVPR1A, CST7, SYTL4, RAB33A, ZNRF1, FYN, ATP6V0A4, RAB17, PACSIN1	703	333	20887	1.60601	1	0.490899	0.466757
GOTERM_CC_DIRECT	GO:0031012~extracellular matrix	14	1.89702	0.0625496	LRRN3, DEFA4, SSC5D, MMP8, MMP9, MUC5AC, ADAMTS16, RTN4RL1, SPOCK3, MMP28, FLRT1, ANOS1, MUC4, PRSS2	703	240	20887	1.73316	1	0.513857	0.488585
GOTERM_CC_DIRECT	GO:0030315~T-tubule	5	0.677507	0.0637571	CAV3, STBD1, AHNAK2, AKAP6, ANK3	703	45	20887	3.30125	1	0.513857	0.488585
GOTERM_CC_DIRECT	GO:1990660~calprotectin complex	2	0.271003	0.0660908	S100A9, S100A8	703	2	20887	29.7112	1	0.513857	0.488585
GOTERM_CC_DIRECT	GO:1990406~CGRP receptor complex	2	0.271003	0.0660908	CALCRL, RAMP1	703	2	20887	29.7112	1	0.513857	0.488585
GOTERM_CC_DIRECT	GO:0001772~immunological synapse	5	0.677507	0.0680576	VAV3, PRKCQ, ATP2B1, CARD11, HLA-DRB1	703	46	20887	3.22948	1	0.513857	0.488585
GOTERM_CC_DIRECT	GO:0042581~specific granule	3	0.406504	0.0688689	ANXA3, OLFM4, LTF	703	13	20887	6.85644	1	0.513857	0.488585
GOTERM_CC_DIRECT	GO:0042383~sarcolemma	8	1.08401	0.0690693	ANXA8L1, OBSCN, CAV3, AHNAK2, ANXA8, ANK3, PDE9A, CLCN1	703	107	20887	2.2214	1	0.513857	0.488585
GOTERM_CC_DIRECT	GO:0030670~phagocytic vesicle membrane	7	0.948509	0.069497	RAB20, ANXA3, RAC2, HLA-DPB1, CYBB, ATP6V0A4, CALR	703	86	20887	2.41836	1	0.513857	0.488585
GOTERM_CC_DIRECT	GO:0005833~hemoglobin complex	3	0.406504	0.0786088	HBG2, HBE1, HBA1	703	14	20887	6.36669	1	0.572553	0.544395
GOTERM_CC_DIRECT	GO:0030424~axon	19	2.57453	0.0915843	KIRREL3, MUSK, ANXA3, COBL, AZIN2, LPAR3, DNM3, PRTG, P2RX3, GRM7, MAP1A, IL1RAPL1, SCN7A, EMB, N4BP3, EPHB1, TNFRSF21, CD200, SNCA	703	380	20887	1.48556	1	0.657252	0.624928
GOTERM_CC_DIRECT	GO:0030018~Z disc	9	1.21951	0.0970964	PDLIM1, OBSCN, CAV3, SYNPO2L, FKBP1C, FLNB, KCNA5, ANK3, PRKD1	703	139	20887	1.92375	1	0.67453	0.641357
GOTERM_CC_DIRECT	GO:0031232~extrinsic component of external side of plasma membrane	2	0.271003	0.097482	CUBN, PCSK9	703	3	20887	19.8075	1	0.67453	0.641357
GOTERM_CC_DIRECT	GO:0043209~myelin sheath	4	0.542005	0.0981386	MAG, BCL2, PLP1, ERMN	703	33	20887	3.60136	1	0.67453	0.641357
GOTERM_CC_DIRECT	GO:0005764~lysosome	16	2.16802	0.10367	WWOX, CALCRL, SRC, PCSK9, GBA1, ANK3, CST7, RNASE2, MPO, GRIN2B, ZNRF1, NEU4, IL1B, CTSG, RNF152, SNCA	703	311	20887	1.52855	1	0.694117	0.65998
GOTERM_CC_DIRECT	GO:0031528~microvillus membrane	4	0.542005	0.105082	CUBN, S100P, PROM1, SLC38A4	703	34	20887	3.49544	1	0.694117	0.65998
GOTERM_CC_DIRECT	GO:0031092~platelet alpha granule membrane	3	0.406504	0.110064	CD109, SYTL4, SNCA	703	17	20887	5.24316	1	0.694117	0.65998
GOTERM_CC_DIRECT	GO:0097038~perinuclear endoplasmic reticulum	3	0.406504	0.110064	OSBPL3, CYBB, FYN	703	17	20887	5.24316	1	0.694117	0.65998
GOTERM_CC_DIRECT	GO:0031234~extrinsic component of cytoplasmic side of plasma membrane	4	0.542005	0.112211	YES1, SRC, ESYT3, FYN	703	35	20887	3.39557	1	0.694117	0.65998
GOTERM_CC_DIRECT	GO:0016235~aggresome	4	0.542005	0.112211	SFMBT2, PRDM16, PRKCQ, HSPA1A	703	35	20887	3.39557	1	0.694117	0.65998
GOTERM_CC_DIRECT	GO:0098685~Schaffer collateral - CA1 synapse	7	0.948509	0.112359	AKAP12, TAMALIN, P2RX3, LRRC4, ITPR1, GSG1L, FYN	703	98	20887	2.12223	1	0.694117	0.65998
GOTERM_CC_DIRECT	GO:0005737~cytoplasm	209	28.3198	0.112367	ROPN1B, MT1X, UBASH3B, DPYSL3, NAMPT, CPNE3, MEF2C, RBFOX1, PRKCH, DAPK1, PRKCE, STARD9, CLEC11A, ANK3, SULT2B1, INPP4B, ASTL, MAP1A, MT1F, TRIM15, PRKD1, LPAR3, FPR2, PKHD1, NEU4, CRACR2B, CEP70, S100A12, HIVEP3, RIMKLA, S100A11, ELANE, GPR15, ARPP21, GADD45A, APOBEC3H, CYP4F3, TMEM196, GRIN2B, PTK2, HRNR, EHD2, SULT1B1, PKIB, CYP2S1, PPP1R1C, MYO5C, SNAI1, CALR, APOBEC3B, RNF220, ANXA8L1, CITED…	703	5754	20887	1.07919	1	0.694117	0.65998
GOTERM_CC_DIRECT	GO:0005911~cell-cell junction	11	1.49051	0.116784	IGSF11, COL17A1, KIRREL3, PDZD2, PRKCH, FLRT1, CDH24, PTPRM, PRKD1, CLDN2, GRHL2	703	193	20887	1.69339	1	0.702719	0.668159
GOTERM_CC_DIRECT	GO:0031090~organelle membrane	4	0.542005	0.11952	GRIN2B, RNF152, GRIN1, GRIA4	703	36	20887	3.30125	1	0.702719	0.668159
GOTERM_CC_DIRECT	GO:0005834~heterotrimeric G-protein complex	4	0.542005	0.11952	GNG4, GNA12, GNB5, GNAI1	703	36	20887	3.30125	1	0.702719	0.668159
GOTERM_CC_DIRECT	GO:0060076~excitatory synapse	4	0.542005	0.11952	IGSF11, SRPX2, LRRC4, GRIN1	703	36	20887	3.30125	1	0.702719	0.668159
GOTERM_CC_DIRECT	GO:0034702~monoatomic ion channel complex	5	0.677507	0.124498	KCNK12, KCNH8, CYBB, LRRC8B, CLCN1	703	57	20887	2.60625	1	0.723276	0.687705
GOTERM_CC_DIRECT	GO:0008074~guanylate cyclase complex, soluble	2	0.271003	0.127819	GUCY1A1, GUCY1B1	703	4	20887	14.8556	1	0.733834	0.697744
GOTERM_CC_DIRECT	GO:0005765~lysosomal membrane	19	2.57453	0.135773	CD63, OCA2, CUBN, HLA-DRB5, EGF, ATP10B, PCSK9, GBA1, TMEM163, GNAI1, DPP4, HLA-DMA, HLA-DPB1, ATP6V0A4, HLA-DOA, RNF152, HLA-DQA1, HLA-DRB1, HLA-DPA1	703	403	20887	1.40078	1	0.764678	0.727071
GOTERM_CC_DIRECT	GO:0090575~RNA polymerase II transcription regulator complex	8	1.08401	0.136326	WWOX, HLF, CEBPE, MAFF, STAT4, POU4F1, ATF3, BACH2	703	127	20887	1.87157	1	0.764678	0.727071
GOTERM_CC_DIRECT	GO:0034451~centriolar satellite	8	1.08401	0.140325	CD86, LHCGR, G6PD, PDZD2, PTPN20, DCDC2, PRKCQ, CCDC61	703	128	20887	1.85695	1	0.778164	0.739894
GOTERM_CC_DIRECT	GO:0071682~endocytic vesicle lumen	3	0.406504	0.144148	HP, CALR, HBA1	703	20	20887	4.45669	1	0.781601	0.743162
GOTERM_CC_DIRECT	GO:0097386~glial cell projection	3	0.406504	0.144148	SCN7A, FYN, ERMN	703	20	20887	4.45669	1	0.781601	0.743162
GOTERM_CC_DIRECT	GO:0101003~ficolin-1-rich granule membrane	5	0.677507	0.14873	SERPINB10, SIGLEC14, STBD1, FPR2, SIGLEC5	703	61	20887	2.43535	1	0.797583	0.758357
GOTERM_CC_DIRECT	GO:0031941~filamentous actin	4	0.542005	0.158455	PDLIM1, CARMIL1, DPYSL3, ESPN	703	41	20887	2.89866	1	0.840501	0.799165
GOTERM_CC_DIRECT	GO:0005905~clathrin-coated pit	5	0.677507	0.161474	CUBN, CLTCL1, SH3BP4, LRP3, DNM1	703	63	20887	2.35803	1	0.847306	0.805635
GOTERM_CC_DIRECT	GO:0010008~endosome membrane	14	1.89702	0.167978	CD63, OCA2, HLA-DRB5, FLT3, ABHD17C, ARHGAP26, EHD2, HLA-DMA, HLA-DPB1, ATP6V0A4, HLA-DOA, HLA-DQA1, HLA-DRB1, HLA-DPA1	703	286	20887	1.4544	1	0.872054	0.829166
GOTERM_CC_DIRECT	GO:0043197~dendritic spine	9	1.21951	0.179722	DNM3, SIPA1L1, ITPKA, LRRC4, ABHD17C, SHANK3, PTK2, GRIN1, GRIA4	703	162	20887	1.65062	1	0.923201	0.877798
GOTERM_CC_DIRECT	GO:0048179~activin receptor complex	2	0.271003	0.185473	ACVR1, ACVR2A	703	6	20887	9.90375	1	0.933103	0.887213
GOTERM_CC_DIRECT	GO:0060473~cortical granule	2	0.271003	0.185473	ASTL, CALR	703	6	20887	9.90375	1	0.933103	0.887213
GOTERM_CC_DIRECT	GO:0000118~histone deacetylase complex	4	0.542005	0.191985	MECOM, SATB2, HR, HDAC9	703	45	20887	2.641	1	0.956006	0.908989
GOTERM_CC_DIRECT	GO:0098794~postsynapse	8	1.08401	0.206566	MEF2C, P2RX3, PSD2, RAB17, CYP46A1, CPLX2, DOCK1, SNCA	703	143	20887	1.66217	1	1	0.952772
GOTERM_CC_DIRECT	GO:0005874~microtubule	15	2.03252	0.210521	DNAH12, DNAI2, PTPN20, DCDC2, TUBA4B, TUBA4A, DNM1, DNM3, TTLL6, TPPP3, TPPP2, KIF26B, MAP1A, KIFC3, TTLL9	703	326	20887	1.36708	1	1	0.952772
GOTERM_CC_DIRECT	GO:0030130~clathrin coat of trans-Golgi network vesicle	2	0.271003	0.212857	CLTCL1, NCALD	703	7	20887	8.48893	1	1	0.952772
GOTERM_CC_DIRECT	GO:0034705~potassium channel complex	2	0.271003	0.212857	KCNA5, KCNK1	703	7	20887	8.48893	1	1	0.952772
GOTERM_CC_DIRECT	GO:0005794~Golgi apparatus	43	5.82656	0.220095	GPSM1, RAB5B, RGPD6, PCSK9, GBA1, CD1E, KCNA5, MS4A4E, CST7, FUT2, FTCD, SH3RF1, FUT4, JAKMIP2, PKHD1, ZDHHC19, RAB20, MGAT5B, ST8SIA6, MALRD1, SRGN, ABCC4, WWOX, CUBN, COL26A1, YES1, AVPR1B, OPALIN, IL15, PRKCE, ANK3, RAB33A, DYNAP, KLF5, PROC, SLPI, UST, MANSC1, PRKD1, KIFC3, MAMLD1, PDE9A, GOLGA8A	703	1100	20887	1.16144	1	1	0.952772
GOTERM_CC_DIRECT	GO:0005604~basement membrane	6	0.813008	0.227518	COL17A1, LAMA3, NTN5, EFNA5, THBS4, FREM3	703	97	20887	1.83781	1	1	0.952772
GOTERM_CC_DIRECT	GO:0010494~cytoplasmic stress granule	6	0.813008	0.233709	RBFOX1, RBPMS, IGF2BP3, CTSG, IGF2BP2, AZU1	703	98	20887	1.81906	1	1	0.952772
GOTERM_CC_DIRECT	GO:0045211~postsynaptic membrane	10	1.35501	0.236149	TAMALIN, MUSK, GRM7, IL1RAPL1, CHRNA6, ANK3, IGSF9B, GRIN2B, SHANK3, GRIN1	703	201	20887	1.47817	1	1	0.952772
GOTERM_CC_DIRECT	GO:0005902~microvillus	5	0.677507	0.23755	WWOX, ANGPT1, PDGFA, ESPN, PROM1	703	74	20887	2.00752	1	1	0.952772
GOTERM_CC_DIRECT	GO:0030056~hemidesmosome	2	0.271003	0.239321	COL17A1, LAMA3	703	8	20887	7.42781	1	1	0.952772
GOTERM_CC_DIRECT	GO:0070382~exocytic vesicle	3	0.406504	0.242138	DPYSL3, SYTL4, NKD2	703	28	20887	3.18335	1	1	0.952772
GOTERM_CC_DIRECT	GO:0005581~collagen trimer	6	0.813008	0.246231	COL17A1, COL26A1, EDA, COL24A1, C1QTNF7, MMP8	703	100	20887	1.78267	1	1	0.952772
GOTERM_CC_DIRECT	GO:0044297~cell body	5	0.677507	0.25222	GJB2, DPYSL3, FYN, TACR1, CD200	703	76	20887	1.95469	1	1	0.952772
GOTERM_CC_DIRECT	GO:0032580~Golgi cisterna membrane	6	0.813008	0.252556	ASAP2, GAL3ST2, FUT2, GOLGA8A, GGTA1, FUT4	703	101	20887	1.76502	1	1	0.952772
GOTERM_CC_DIRECT	GO:0030667~secretory granule membrane	6	0.813008	0.258922	SERPINB10, RAB5B, SLC30A8, FRMPD3, ITPR1, SIGLEC5	703	102	20887	1.74772	1	1	0.952772
GOTERM_CC_DIRECT	GO:0098839~postsynaptic density membrane	6	0.813008	0.258922	EFNB3, LRRC4, GSG1L, ABHD17C, GRIN2B, GRIA4	703	102	20887	1.74772	1	1	0.952772
GOTERM_CC_DIRECT	GO:0030672~synaptic vesicle membrane	7	0.948509	0.261273	ZNRF1, RAB5B, SV2B, ATP6V0A4, ATP2B1, TMEM163, SNCA	703	128	20887	1.62483	1	1	0.952772
GOTERM_CC_DIRECT	GO:0000785~chromatin	44	5.96206	0.262811	CSRNP1, RHOXF2, HLF, BNC2, TSHZ3, ZBTB46, CEBPE, SATB2, HR, ETS2, BACH2, BCL7A, HOXA3, MAEL, STAT4, HOXA2, JARID2, HOXA6, HOXA5, HOXA4, SPDEF, SMAD1, MEF2C, NPM2, PBX3, PAX3, POU4F1, GRHL2, MYT1, ST18, FOXR1, NR4A1, MEIS1, NR4A3, NR6A1, KLF5, ZNF618, MAFF, AHRR, TCF4, NANOG, PLCB1, ATF3, DPEP3	703	1156	20887	1.13088	1	1	0.952772
GOTERM_CC_DIRECT	GO:0005915~zonula adherens	2	0.271003	0.264897	SORBS1, KIFC3	703	9	20887	6.6025	1	1	0.952772
GOTERM_CC_DIRECT	GO:0044294~dendritic growth cone	2	0.271003	0.264897	SRC, COBL	703	9	20887	6.6025	1	1	0.952772
GOTERM_CC_DIRECT	GO:0005783~endoplasmic reticulum	45	6.09756	0.267705	CALCRL, RTN1, FLT3, LAMA3, ITPR1, ATP10B, PCSK9, GBA1, ATP10A, ATP2C2, CST7, CYP46A1, PTGS2, THBS4, FTCD, PIK3C2B, PKHD1, ZDHHC19, PDZD2, STBD1, TSPO, STOM, PROM1, EPHB1, CUBN, SDF2L1, CAVIN1, CAV3, PRKCE, ELOVL3, RRAS2, ANK3, CKAP4, SULT2B1, PROC, SCD, CYP2S1, ALOX5AP, TAFA1, BCL2, TMCC2, P4HB, CALR, PDE9A, HSPA1A	703	1185	20887	1.12827	1	1	0.952772
GOTERM_CC_DIRECT	GO:0042470~melanosome	6	0.813008	0.271763	CD63, RAB5B, GGH, STOM, P4HB, RAB17	703	104	20887	1.71411	1	1	0.952772
GOTERM_CC_DIRECT	GO:0016607~nuclear speck	18	2.43902	0.286204	PPP1R16B, CARMIL1, MEF2C, GADD45A, IL15, SFMBT2, GLI2, AFF2, MECOM, WT1, NAMPT, MNDA, MAML3, PLCB1, DOCK1, HOXA6, HSPA1A, RBM11	703	432	20887	1.23797	1	1	0.952772
GOTERM_CC_DIRECT	GO:0017146~NMDA selective glutamate receptor complex	2	0.271003	0.289614	GRIN2B, GRIN1	703	10	20887	5.94225	1	1	0.952772
GOTERM_CC_DIRECT	GO:0016323~basolateral plasma membrane	12	1.62602	0.292706	ABCC4, ABCC1, CEACAM5, SLC40A1, ATP6V0A4, LPO, ANK3, ALPK2, ATP2B1, ATP2C2, RAB17, NKD2	703	269	20887	1.32541	1	1	0.952772
GOTERM_CC_DIRECT	GO:0034663~endoplasmic reticulum chaperone complex	2	0.271003	0.313501	SDF2L1, P4HB	703	11	20887	5.40204	1	1	0.952772
GOTERM_CC_DIRECT	GO:0032045~guanyl-nucleotide exchange factor complex	2	0.271003	0.313501	DOCK1, RASGRP3	703	11	20887	5.40204	1	1	0.952772
GOTERM_CC_DIRECT	GO:0005667~transcription regulator complex	11	1.49051	0.313815	PDLIM1, NR4A1, MEIS1, KLF5, NR6A1, NR4A3, SATB2, PBX3, TCF4, ZNF534, HDAC9	703	246	20887	1.32855	1	1	0.952772
GOTERM_CC_DIRECT	GO:0032420~stereocilium	3	0.406504	0.329918	TSPEAR, ESPN, ADCY6	703	35	20887	2.54668	1	1	0.952772
GOTERM_CC_DIRECT	GO:0030027~lamellipodium	9	1.21951	0.333649	DPP4, CARMIL1, ABLIM1, DPYSL3, RAC2, PTPRM, P4HB, ARPC5, SH3RF1	703	195	20887	1.37129	1	1	0.952772
GOTERM_CC_DIRECT	GO:0097731~9+0 non-motile cilium	2	0.271003	0.336586	PKHD1, TTLL6	703	12	20887	4.95187	1	1	0.952772
GOTERM_CC_DIRECT	GO:0033270~paranode region of axon	2	0.271003	0.336586	MAG, ERMN	703	12	20887	4.95187	1	1	0.952772
GOTERM_CC_DIRECT	GO:0030132~clathrin coat of coated pit	2	0.271003	0.336586	EHD2, CLTCL1	703	12	20887	4.95187	1	1	0.952772
GOTERM_CC_DIRECT	GO:0043679~axon terminus	4	0.542005	0.337116	TANC1, PDYN, PACSIN1, SNCA	703	61	20887	1.94828	1	1	0.952772
GOTERM_CC_DIRECT	GO:0008076~voltage-gated potassium channel complex	5	0.677507	0.343054	DPP10, KCNH4, DPP6, KCNA5, KCNK1	703	88	20887	1.68814	1	1	0.952772
GOTERM_CC_DIRECT	GO:0005575~cellular_component	17	2.30352	0.344609	AUTS2, ARPP21, SCT, URAD, TMEM51, ARHGAP26, TUBA4B, GGTA1, PCNX2, CYSLTR2, SH3TC1, RCAN2, TMSB15B, PRB2, SAMD12, AMZ1, MSRB1	703	422	20887	1.1969	1	1	0.952772
GOTERM_CC_DIRECT	GO:0017053~transcription repressor complex	4	0.542005	0.346374	GFI1, PRDM16, CORO2A, ELANE	703	62	20887	1.91685	1	1	0.952772
GOTERM_CC_DIRECT	GO:0015629~actin cytoskeleton	12	1.62602	0.346425	ABLIM1, SIPA1L1, AUTS2, SYNPO2L, DAPK1, MYO5C, TSPAN5, FLNB, ARPC5, EFR3B, MSRB1, SNCA	703	281	20887	1.26881	1	1	0.952772
GOTERM_CC_DIRECT	GO:0001725~stress fiber	5	0.677507	0.350729	PDLIM1, ABLIM1, FLNB, SORBS1, PTK2	703	89	20887	1.66917	1	1	0.952772
GOTERM_CC_DIRECT	GO:0000139~Golgi membrane	27	3.65854	0.356226	GPSM1, RTN1, PDGFA, CD1E, ATP2C2, FUT2, FTCD, FUT4, ZDHHC19, CHST11, MGAT5B, CD59, ST8SIA6, HLA-DQA1, HLA-DPA1, RHBDF1, HLA-DRB5, SLC30A8, CAV3, RRAS2, CBFA2T3, RAB33A, DYNAP, SLC9A7, UST, HLA-DPB1, HLA-DRB1	703	710	20887	1.12986	1	1	0.952772
GOTERM_CC_DIRECT	GO:0060170~ciliary membrane	4	0.542005	0.364846	GPI, TAS2R46, TSPEAR, SHANK3	703	64	20887	1.85695	1	1	0.952772
GOTERM_CC_DIRECT	GO:0012506~vesicle membrane	3	0.406504	0.366816	ANXA8L1, ANXA3, ANXA8	703	38	20887	2.34562	1	1	0.952772
GOTERM_CC_DIRECT	GO:1990531~phospholipid-translocating ATPase complex	2	0.271003	0.380457	ATP10B, ATP10A	703	14	20887	4.24446	1	1	0.952772
GOTERM_CC_DIRECT	GO:0033391~chromatoid body	2	0.271003	0.380457	MAEL, TDRD5	703	14	20887	4.24446	1	1	0.952772
GOTERM_CC_DIRECT	GO:0008021~synaptic vesicle	6	0.813008	0.397805	KIRREL3, SV2B, SLC40A1, STON2, SNCAIP, GRIN1	703	123	20887	1.44933	1	1	0.952772
GOTERM_CC_DIRECT	GO:0036126~sperm flagellum	5	0.677507	0.404323	DNAI2, TPPP2, TACR1, CABCOCO1, TCP11	703	96	20887	1.54746	1	1	0.952772
GOTERM_CC_DIRECT	GO:0016324~apical plasma membrane	16	2.16802	0.40446	ABCC4, CUBN, ABCC1, MAST4, CYP4F3, SLC12A1, PKHD1, DPP4, SLC22A12, CEACAM6, CEACAM5, ATP6V0A4, TNIK, RAB17, PROM1, KCNK1	703	410	20887	1.15946	1	1	0.952772
GOTERM_CC_DIRECT	GO:0043202~lysosomal lumen	5	0.677507	0.419512	CUBN, NEU4, CD1E, GBA1, GPC5	703	98	20887	1.51588	1	1	0.952772
GOTERM_CC_DIRECT	GO:0031091~platelet alpha granule	2	0.271003	0.42143	MMRN1, F5	703	16	20887	3.7139	1	1	0.952772
GOTERM_CC_DIRECT	GO:0042622~photoreceptor outer segment membrane	2	0.271003	0.42143	PDE6H, PROM1	703	16	20887	3.7139	1	1	0.952772
GOTERM_CC_DIRECT	GO:0043198~dendritic shaft	3	0.406504	0.426404	KIRREL3, GRM7, MAP1A	703	43	20887	2.07288	1	1	0.952772
GOTERM_CC_DIRECT	GO:0030659~cytoplasmic vesicle membrane	6	0.813008	0.4311	GPRC5A, FLRT1, SH3BP5, KIFC3, MALRD1, PACSIN1	703	128	20887	1.39271	1	1	0.952772
GOTERM_CC_DIRECT	GO:0098686~hippocampal mossy fiber to CA3 synapse	3	0.406504	0.437974	EFNB3, P2RX3, PDYN	703	44	20887	2.02577	1	1	0.952772
GOTERM_CC_DIRECT	GO:0001518~voltage-gated sodium channel complex	2	0.271003	0.44089	SCN7A, SCN4B	703	17	20887	3.49544	1	1	0.952772
GOTERM_CC_DIRECT	GO:0005858~axonemal dynein complex	2	0.271003	0.44089	DNAH12, DNAI2	703	17	20887	3.49544	1	1	0.952772
GOTERM_CC_DIRECT	GO:0000932~P-body	5	0.677507	0.442114	RBPMS, APOBEC3H, IGF2BP3, IGF2BP2, APOBEC3B	703	101	20887	1.47085	1	1	0.952772
GOTERM_CC_DIRECT	GO:0005770~late endosome	7	0.948509	0.445374	SRC, RASGEF1B, CLTCL1, PCSK9, CD1E, CST7, GRIN2B	703	159	20887	1.30804	1	1	0.952772
GOTERM_CC_DIRECT	GO:0030136~clathrin-coated vesicle	4	0.542005	0.45522	DNAJC6, CLTCL1, SH3BP4, STON2	703	74	20887	1.60601	1	1	0.952772
GOTERM_CC_DIRECT	GO:0005884~actin filament	5	0.677507	0.457037	YES1, SRC, RAC2, COBL, FYN	703	103	20887	1.44229	1	1	0.952772
GOTERM_CC_DIRECT	GO:0043034~costamere	2	0.271003	0.459697	AHNAK2, ANK3	703	18	20887	3.30125	1	1	0.952772
GOTERM_CC_DIRECT	GO:0012505~endomembrane system	7	0.948509	0.463169	RAB5B, RAB20, CLTCL1, ATP10B, TMCC2, ATP10A, RAB17	703	162	20887	1.28382	1	1	0.952772
GOTERM_CC_DIRECT	GO:0098793~presynapse	7	0.948509	0.474951	DNM3, NR4A1, TNIK, GNB5, DOC2B, CYP46A1, DNM1	703	164	20887	1.26816	1	1	0.952772
GOTERM_CC_DIRECT	GO:0043020~NADPH oxidase complex	2	0.271003	0.477872	RAC2, CYBB	703	19	20887	3.1275	1	1	0.952772
GOTERM_CC_DIRECT	GO:0016234~inclusion body	2	0.271003	0.477872	HSPA1A, SNCA	703	19	20887	3.1275	1	1	0.952772
GOTERM_CC_DIRECT	GO:0042995~cell projection	8	1.08401	0.478418	PPP1R16B, RTN4RL1, RAC2, ATP2B1, ARPC5, PTK2, DNM1, PACSIN1	703	194	20887	1.22521	1	1	0.952772
GOTERM_CC_DIRECT	GO:0045335~phagocytic vesicle	4	0.542005	0.481326	RAB20, CYBB, FLNB, ELANE	703	77	20887	1.54344	1	1	0.952772
GOTERM_CC_DIRECT	GO:0045177~apical part of cell	4	0.542005	0.489896	ACVR1, EDA, DCHS1, ATP6V0A4	703	78	20887	1.52365	1	1	0.952772
GOTERM_CC_DIRECT	GO:0030426~growth cone	6	0.813008	0.489902	TSHZ3, AUTS2, DPYSL3, PCDHGB1, NGEF, SNCA	703	137	20887	1.30122	1	1	0.952772
GOTERM_CC_DIRECT	GO:0016528~sarcoplasm	2	0.271003	0.495436	MEF2C, BAALC	703	20	20887	2.97112	1	1	0.952772
GOTERM_CC_DIRECT	GO:0005912~adherens junction	8	1.08401	0.505205	PDLIM1, LAMA3, CDH24, PTPRM, SORBS1, NECTIN4, EFNA5, S100A11	703	199	20887	1.19442	1	1	0.952772
GOTERM_CC_DIRECT	GO:0032433~filopodium tip	2	0.271003	0.51241	OSBPL3, EPHB1	703	21	20887	2.82964	1	1	0.952772
GOTERM_CC_DIRECT	GO:0005793~endoplasmic reticulum-Golgi intermediate compartment	4	0.542005	0.515178	GJB2, P4HB, PROM1, FTCD	703	81	20887	1.46722	1	1	0.952772
GOTERM_CC_DIRECT	GO:0009898~cytoplasmic side of plasma membrane	5	0.677507	0.529304	G6PD, PTPN20, ESYT3, ATP2C2, SAMD12	703	113	20887	1.31466	1	1	0.952772
GOTERM_CC_DIRECT	GO:0055037~recycling endosome	6	0.813008	0.540235	SLC9A7, FYN, TNIK, RAB17, KCNK1, LTF	703	145	20887	1.22943	1	1	0.952772
GOTERM_CC_DIRECT	GO:0055038~recycling endosome membrane	5	0.677507	0.543195	EHD2, SLC9A7, HLA-DPB1, ABHD17C, RAB17	703	115	20887	1.29179	1	1	0.952772
GOTERM_CC_DIRECT	GO:0043186~P granule	2	0.271003	0.544667	MAEL, TDRD5	703	23	20887	2.58359	1	1	0.952772
GOTERM_CC_DIRECT	GO:0005942~phosphatidylinositol 3-kinase complex	2	0.271003	0.544667	SOCS2, PIK3C2B	703	23	20887	2.58359	1	1	0.952772
GOTERM_CC_DIRECT	GO:0072562~blood microparticle	9	1.21951	0.550081	HBG2, PZP, HBE1, HP, STOM, HBA1, KNG1, HSPA1A, JCHAIN	703	238	20887	1.12353	1	1	0.952772
GOTERM_CC_DIRECT	GO:0033116~endoplasmic reticulum-Golgi intermediate compartment membrane	4	0.542005	0.555768	AZIN2, CD59, CALR, F5	703	86	20887	1.38192	1	1	0.952772
GOTERM_CC_DIRECT	GO:0031410~cytoplasmic vesicle	11	1.49051	0.572569	CCDC198, SLC30A8, SH3TC2, FLRT1, RAC2, AZIN2, ATP2C2, CST7, N4BP3, NKD2, FGFR1	703	304	20887	1.07508	1	1	0.952772
GOTERM_CC_DIRECT	GO:0035097~histone methyltransferase complex	2	0.271003	0.574793	JARID2, HDAC9	703	25	20887	2.3769	1	1	0.952772
GOTERM_CC_DIRECT	GO:0005929~cilium	9	1.21951	0.592289	PKHD1, WDR49, TTLL6, PKM, DCDC2, PROM1, ADCY6, TTLL9, GLI2	703	247	20887	1.0826	1	1	0.952772
GOTERM_CC_DIRECT	GO:0005637~nuclear inner membrane	3	0.406504	0.594321	SMAD1, ITPR1, PTGS2	703	59	20887	1.51074	1	1	0.952772
GOTERM_CC_DIRECT	GO:0031594~neuromuscular junction	4	0.542005	0.601689	MUSK, CAV3, FYN, ANK3	703	92	20887	1.29179	1	1	0.952772
GOTERM_CC_DIRECT	GO:0030054~cell junction	7	0.948509	0.603166	IQCJ-SCHIP1, GPR142, ATP23, SRC, SCHIP1, NAMPT, CPNE3	703	187	20887	1.11219	1	1	0.952772
GOTERM_CC_DIRECT	GO:0071944~cell periphery	3	0.406504	0.60351	PRKCE, FUT4, NKD2	703	60	20887	1.48556	1	1	0.952772
GOTERM_CC_DIRECT	GO:0043083~synaptic cleft	2	0.271003	0.616291	DNM3, GRIN1	703	28	20887	2.12223	1	1	0.952772
GOTERM_CC_DIRECT	GO:0008305~integrin complex	2	0.271003	0.616291	ITGAM, ITGB8	703	28	20887	2.12223	1	1	0.952772
GOTERM_CC_DIRECT	GO:0005769~early endosome	11	1.49051	0.617599	EHD2, PTP4A3, RAB5B, RASGEF1B, DNER, RFTN1, PCSK9, CD1E, RAB17, CYTIP, LTF	703	315	20887	1.03754	1	1	0.952772
GOTERM_CC_DIRECT	GO:0043204~perikaryon	6	0.813008	0.622208	RTN4RL1, AZIN2, FYN, CPLX2, KCNK1, PDE9A	703	159	20887	1.12118	1	1	0.952772
GOTERM_CC_DIRECT	GO:0031514~motile cilium	5	0.677507	0.627923	ROPN1B, FBXL13, HAVCR1, TTLL9, GLI2	703	128	20887	1.1606	1	1	0.952772
GOTERM_CC_DIRECT	GO:0001669~acrosomal vesicle	5	0.677507	0.651879	CAPN11, SV2B, CALR, TCP11, DPEP3	703	132	20887	1.12543	1	1	0.952772
GOTERM_CC_DIRECT	GO:0045171~intercellular bridge	4	0.542005	0.664464	EHD2, PHLDB1, ACOT12, OLFM4	703	101	20887	1.17668	1	1	0.952772
GOTERM_CC_DIRECT	GO:0005721~pericentric heterochromatin	2	0.271003	0.665399	ZNF618, SNAI1	703	32	20887	1.85695	1	1	0.952772
GOTERM_CC_DIRECT	GO:0031965~nuclear membrane	9	1.21951	0.666299	NR4A1, NPIPA8, SMOX, OSBPL3, ALOX5AP, BCL2, AKAP6, TMEM38A, PLCB1	703	264	20887	1.01288	1	1	0.952772
GOTERM_CC_DIRECT	GO:0032587~ruffle membrane	4	0.542005	0.670975	PSD2, SRC, PDE9A, PACSIN1	703	102	20887	1.16515	1	1	0.952772
GOTERM_CC_DIRECT	GO:0005802~trans-Golgi network	7	0.948509	0.676866	RBFOX1, SLC9A7, CLTCL1, AZIN2, GBA1, PRKD1, FUT4	703	202	20887	1.0296	1	1	0.952772
GOTERM_CC_DIRECT	GO:0001750~photoreceptor outer segment	3	0.406504	0.679143	CNGB3, PROM1, NXNL1	703	69	20887	1.29179	1	1	0.952772
GOTERM_CC_DIRECT	GO:0005789~endoplasmic reticulum membrane	38	5.14905	0.680747	CHODL, GPSM1, GUCY2C, OCA2, EDA, RTN1, ITPR1, ATP10B, ATP10A, CYP46A1, PTGS2, NEU4, AWAT1, STBD1, FLRT1, HSD17B2, TM4SF20, RAC2, CD59, LRRC8B, RHBDF1, TMEM178A, OSBPL3, ELOVL3, CYP4F3, SCD5, CYBB, GRIN2B, CKAP4, GRIN1, SCD, CYP2S1, ALOX5AP, BCL2, ESYT3, TMCC2, CALR, SLC28A3	703	1173	20887	0.962512	1	1	0.952772
GOTERM_CC_DIRECT	GO:0005791~rough endoplasmic reticulum	2	0.271003	0.687547	PKM, CKAP4	703	34	20887	1.74772	1	1	0.952772
GOTERM_CC_DIRECT	GO:0044853~plasma membrane raft	2	0.271003	0.698065	ITGAM, PRTN3	703	35	20887	1.69779	1	1	0.952772
GOTERM_CC_DIRECT	GO:0009925~basal plasma membrane	3	0.406504	0.701597	ABCC1, TACSTD2, ANK3	703	72	20887	1.23797	1	1	0.952772
GOTERM_CC_DIRECT	GO:0005829~cytosol	184	24.9322	0.736436	CDA, PHLDB1, GUCY1B1, TXNL4B, MSI2, BACH2, ETS2, DPYSL4, DPYSL3, CLEC5A, NAMPT, BAALC, CPNE3, EPHB1, RGS6, CUBN, MEF2C, GUCY1A1, G6PD, PRKCH, SDS, SFMBT2, PRKCE, HBE1, ACOT12, ANK3, OLFM4, MYT1, TUBA4A, SULT2B1, INPP4B, SFRP1, OBSCN, DOK6, CD109, MAP1A, PRTN3, TRIB3, PRKCQ, TNIK, PRKD1, S100A9, PDE9A, S100A8, NGEF, CARD11, GOLGA8A, CHODL, TACSTD2, RASAL1, KLHL13, CPLX2, FHIT, SOCS2, ARHGAP22, HRH…	703	5649	20887	0.967758	1	1	0.952772
GOTERM_CC_DIRECT	GO:0016604~nuclear body	11	1.49051	0.736509	OBSCN, MSANTD1, GFI1, SFMBT2, SCHIP1, SH3BP5, AFF3, MAMLD1, INAVA, SCRT1, HOXA4	703	348	20887	0.939148	1	1	0.952772
GOTERM_CC_DIRECT	GO:0033017~sarcoplasmic reticulum membrane	2	0.271003	0.73672	FKBP1C, TMEM38A	703	39	20887	1.52365	1	1	0.952772
GOTERM_CC_DIRECT	GO:0031463~Cul3-RING ubiquitin ligase complex	2	0.271003	0.745585	KLHL25, KLHL13	703	40	20887	1.48556	1	1	0.952772
GOTERM_CC_DIRECT	GO:0098982~GABA-ergic synapse	3	0.406504	0.755134	GUCY1A1, PLCB1, EFNA5	703	80	20887	1.11417	1	1	0.952772
GOTERM_CC_DIRECT	GO:0048786~presynaptic active zone	2	0.271003	0.770432	PPFIBP1, GRM7	703	43	20887	1.38192	1	1	0.952772
GOTERM_CC_DIRECT	GO:0016459~myosin complex	2	0.271003	0.770432	MYO5C, CCDC102A	703	43	20887	1.38192	1	1	0.952772
GOTERM_CC_DIRECT	GO:0008180~COP9 signalosome	2	0.271003	0.785635	FYN, HSPA1A	703	45	20887	1.3205	1	1	0.952772
GOTERM_CC_DIRECT	GO:0016342~catenin complex	2	0.271003	0.785635	CDH24, DCHS1	703	45	20887	1.3205	1	1	0.952772
GOTERM_CC_DIRECT	GO:0005771~multivesicular body	2	0.271003	0.792855	CD63, CST7	703	46	20887	1.29179	1	1	0.952772
GOTERM_CC_DIRECT	GO:0030134~COPII-coated ER to Golgi transport vesicle	2	0.271003	0.806575	PCSK9, F5	703	48	20887	1.23797	1	1	0.952772
GOTERM_CC_DIRECT	GO:0005669~transcription factor TFIID complex	2	0.271003	0.813091	TAF7L, SUPT3H	703	49	20887	1.2127	1	1	0.952772
GOTERM_CC_DIRECT	GO:0043195~terminal bouton	2	0.271003	0.813091	CPLX2, GRIN1	703	49	20887	1.2127	1	1	0.952772
GOTERM_CC_DIRECT	GO:0005875~microtubule associated complex	2	0.271003	0.813091	CLIP2, MAP1A	703	49	20887	1.2127	1	1	0.952772
GOTERM_CC_DIRECT	GO:0016363~nuclear matrix	4	0.542005	0.816923	GFI1, SATB2, DNTT, SORBS1	703	130	20887	0.914192	1	1	0.952772
GOTERM_CC_DIRECT	GO:0005930~axoneme	4	0.542005	0.816923	DNAH12, DNAI2, DCDC2, GLI2	703	130	20887	0.914192	1	1	0.952772
GOTERM_CC_DIRECT	GO:0045111~intermediate filament cytoskeleton	2	0.271003	0.831353	PRKCE, S100A8	703	52	20887	1.14274	1	1	0.952772
GOTERM_CC_DIRECT	GO:0031201~SNARE complex	2	0.271003	0.831353	DOC2B, CPLX2	703	52	20887	1.14274	1	1	0.952772
GOTERM_CC_DIRECT	GO:0005923~bicellular tight junction	4	0.542005	0.832502	AOC1, TRAF4, ANK3, CLDN2	703	134	20887	0.886903	1	1	0.952772
GOTERM_CC_DIRECT	GO:0070161~anchoring junction	2	0.271003	0.842526	DPP4, PTK2	703	54	20887	1.10042	1	1	0.952772
GOTERM_CC_DIRECT	GO:0042734~presynaptic membrane	4	0.542005	0.846929	EFNB3, CHRNA6, ATP2B1, SNCAIP	703	138	20887	0.861195	1	1	0.952772
GOTERM_CC_DIRECT	GO:0097225~sperm midpiece	2	0.271003	0.847832	TACR1, TCP11	703	55	20887	1.08041	1	1	0.952772
GOTERM_CC_DIRECT	GO:0030133~transport vesicle	3	0.406504	0.85006	DEFA4, AZIN2, CD59	703	99	20887	0.900341	1	1	0.952772
GOTERM_CC_DIRECT	GO:0001673~male germ cell nucleus	2	0.271003	0.85296	MAEL, MORC1	703	56	20887	1.06112	1	1	0.952772
GOTERM_CC_DIRECT	GO:0036064~ciliary basal body	5	0.677507	0.858814	PKHD1, TTLL6, PTK2, TTLL9, CCDC61	703	180	20887	0.825312	1	1	0.952772
GOTERM_CC_DIRECT	GO:0005903~brush border	2	0.271003	0.862704	FLNB, ESPN	703	58	20887	1.02453	1	1	0.952772
GOTERM_CC_DIRECT	GO:0001533~cornified envelope	2	0.271003	0.871803	CSTA, HRNR	703	60	20887	0.990375	1	1	0.952772
GOTERM_CC_DIRECT	GO:0005741~mitochondrial outer membrane	6	0.813008	0.873249	NEU4, PPP2R2B, MTARC1, BCL2, RAC2, TSPO	703	223	20887	0.799405	1	1	0.952772
GOTERM_CC_DIRECT	GO:0005815~microtubule organizing center	2	0.271003	0.884334	DCDC2, CCDC61	703	63	20887	0.943214	1	1	0.952772
GOTERM_CC_DIRECT	GO:1904115~axon cytoplasm	2	0.271003	0.892002	MAP1A, TRIM46	703	65	20887	0.914192	1	1	0.952772
GOTERM_CC_DIRECT	GO:0019005~SCF ubiquitin ligase complex	2	0.271003	0.905847	SPSB1, FBXL13	703	69	20887	0.861195	1	1	0.952772
GOTERM_CC_DIRECT	GO:0005801~cis-Golgi network	2	0.271003	0.905847	AZIN2, GOLGA8A	703	69	20887	0.861195	1	1	0.952772
GOTERM_CC_DIRECT	GO:0031901~early endosome membrane	5	0.677507	0.920567	RAB5B, CD207, HLA-DPB1, TMEM163, EPHB1	703	207	20887	0.717663	1	1	0.952772
GOTERM_CC_DIRECT	GO:0032991~protein-containing complex	18	2.43902	0.924558	GPSM1, ALK, SMAD1, MEF2C, CAVIN1, RFTN1, NPR3, OLFM4, PTGS2, ACR, BCL2, P4HB, SLC12A7, HSPA1A, RNF220, DPEP3, LTF, SNCA	703	684	20887	0.781875	1	1	0.952772
GOTERM_CC_DIRECT	GO:0005635~nuclear envelope	5	0.677507	0.928898	ALOX5AP, RAC2, CYBB, AKAP6, CALR	703	212	20887	0.700737	1	1	0.952772
GOTERM_CC_DIRECT	GO:0036464~cytoplasmic ribonucleoprotein granule	2	0.271003	0.941762	SNCAIP, SHB	703	83	20887	0.715933	1	1	0.952772
GOTERM_CC_DIRECT	GO:0072686~mitotic spindle	3	0.406504	0.96145	PKHD1, DCDC2, CDC14B	703	148	20887	0.602255	1	1	0.96145
GOTERM_CC_DIRECT	GO:0005643~nuclear pore	2	0.271003	0.963989	NPIPA8, RGPD6	703	97	20887	0.612603	1	1	0.963989
GOTERM_CC_DIRECT	GO:0001650~fibrillar center	3	0.406504	0.965644	TRAF4, SNAI1, FHIT	703	152	20887	0.586406	1	1	0.965644
GOTERM_CC_DIRECT	GO:0001726~ruffle	2	0.271003	0.96638	COBL, S100A11	703	99	20887	0.600227	1	1	0.96638
GOTERM_CC_DIRECT	GO:0015630~microtubule cytoskeleton	4	0.542005	0.967935	EHD2, DCDC2, KIFC3, TUBA4A	703	202	20887	0.588341	1	1	0.967935
GOTERM_CC_DIRECT	GO:1903561~extracellular vesicle	3	0.406504	0.971123	PKM, F5, GRIA4	703	158	20887	0.564137	1	1	0.971123
GOTERM_CC_DIRECT	GO:0005811~lipid droplet	2	0.271003	0.975323	EDA, CKAP4	703	108	20887	0.550208	1	1	0.975323
GOTERM_CC_DIRECT	GO:0005777~peroxisome	2	0.271003	0.97774	AOC1, URAD	703	111	20887	0.535338	1	1	0.97774
GOTERM_CC_DIRECT	GO:0005814~centriole	3	0.406504	0.983939	STARD9, FTCD, HSPA1A	703	178	20887	0.500751	1	1	0.983939
GOTERM_CC_DIRECT	GO:0005813~centrosome	14	1.89702	0.99045	CHODL, YES1, SORBS1, FBXL13, CABCOCO1, GNAI1, PTK2, CDC14B, PKHD1, CEP70, KIFC3, MAMLD1, CCDC61, HSPA1A	703	671	20887	0.619907	1	1	0.99045
GOTERM_CC_DIRECT	GO:0005739~mitochondrion	36	4.87805	0.991877	ATP23, MTARC1, SRC, PPM1J, GLYAT, FHIT, HK3, ADAM28, SH3BP5, TSPO, STOM, FYN, CPNE3, CKB, JARID2, CRYM, NXNL1, SNCA, WWOX, GLYATL1, SDS, CAVIN1, NUBPL, PRKCE, AZIN2, OLFM4, ARHGAP26, SUGCT, NR4A1, PKM, PPP2R2B, MTHFD2L, MAFF, BCL2, NDUFAF2, HSPA1A	703	1485	20887	0.720272	1	1	0.991877
GOTERM_CC_DIRECT	GO:0005819~spindle	2	0.271003	0.994753	CLTCL1, TUBA4A	703	153	20887	0.388382	1	1	0.994753
GOTERM_CC_DIRECT	GO:0005634~nucleus	175	23.7127	0.998173	ZNF331, GFI1, MT1X, MPO, BACH2, ETS2, CDC14B, UBASH3B, MACROD1, HOXA3, MAEL, FAM53A, CPNE3, HOXA6, HOXA5, RGS6, PPP1R16B, KCTD19, MEF2C, RBFOX1, PRKCH, DAPK1, SFMBT2, PRKCE, TEX55, SSUH2, STARD9, UBE2E2, MYT1, TUBA4A, MOB3B, SULT2B1, CLIP2, MT1F, TRIM15, TRIB3, TNIK, PRKD1, MAML3, S100A9, ZNF157, S100A8, ATF3, DPEP3, KHDRBS2, ZBTB8A, TSHZ3, TACSTD2, AEBP1, CPLX2, FHIT, INAVA, ARHGAP22, PKHD1, PDZ…	703	6175	20887	0.842019	1	1	0.998173
GOTERM_CC_DIRECT	GO:0030496~midbody	2	0.271003	0.998632	RASGEF1B, GNAI1	703	192	20887	0.309492	1	1	0.998632
GOTERM_CC_DIRECT	GO:0005654~nucleoplasm	103	13.9566	0.999673	TXNL4B, HR, MPO, BACH2, ETS2, CDC14B, MACROD1, HOXA3, HOXA2, BAALC, CPNE3, HOXA6, RGS6, HOXA4, MEF2C, SFMBT2, ACOT12, OLFM4, MYT1, TRIB3, TNIK, MAML3, PDE9A, ATF3, DPEP3, KHDRBS2, TSHZ3, INAVA, PRDM16, TSPAN5, SMYD3, RBM11, CARMIL1, SMAD1, FAM9B, RBPMS, APOBEC3H, GADD45A, NR4A1, NR4A3, MAFF, SNAI1, NANOG, GTF2IRD1, APOBEC3B, GPSM1, CIITA, BNC2, SCHIP1, CITED4, SLC40A1, PTPN20, PRKAG2, AFF3, SHB, …	703	4030	20887	0.759369	1	1	0.999673
GOTERM_CC_DIRECT	GO:0005694~chromosome	2	0.271003	0.99984	MLLT3, ZNF521	703	254	20887	0.233947	1	1	0.99984
GOTERM_CC_DIRECT	GO:0005743~mitochondrial inner membrane	6	0.813008	0.999844	IMMP2L, NEU4, MTARC1, SRC, MTHFD2L, NDUFAF2	703	501	20887	0.355823	1	1	0.999844
GOTERM_CC_DIRECT	GO:0005759~mitochondrial matrix	4	0.542005	0.999938	NUBPL, MTHFD2L, ACSM6, GLYAT	703	421	20887	0.282292	1	1	0.999938
GOTERM_CC_DIRECT	GO:0005730~nucleolus	19	2.57453	1	ABCC4, NPM2, RASL11A, ITPR1, CD1E, STON2, CBFA2T3, GNAI1, CDC14B, GLI2, GPRC5A, WT1, SCD, MNDA, NANOG, CPNE3, YPEL4, ATF3, RGS6	703	1400	20887	0.403224	1	1	1
GOTERM_CC_DIRECT	GO:0031588~nucleotide-activated protein kinase complex	1	0.135501	1	PRKAG2	703	12	20887	2.47594	1	1	1
GOTERM_CC_DIRECT	GO:0098844~postsynaptic endocytic zone membrane	1	0.135501	1	DNM3	703	1	20887	29.7112	1	1	1
GOTERM_CC_DIRECT	GO:1990005~granular vesicle	1	0.135501	1	AZIN2	703	1	20887	29.7112	1	1	1
GOTERM_CC_DIRECT	GO:0044354~macropinosome	1	0.135501	1	CARMIL1	703	7	20887	4.24446	1	1	1
GOTERM_CC_DIRECT	GO:0098562~cytoplasmic side of membrane	1	0.135501	1	FKBP1C	703	3	20887	9.90375	1	1	1
GOTERM_CC_DIRECT	GO:0043159~acrosomal matrix	1	0.135501	1	ACR	703	4	20887	7.42781	1	1	1
GOTERM_CC_DIRECT	GO:0016222~procollagen-proline 4-dioxygenase complex	1	0.135501	1	P4HB	703	2	20887	14.8556	1	1	1
GOTERM_CC_DIRECT	GO:1901588~dendritic microtubule	1	0.135501	1	MAP1A	703	3	20887	9.90375	1	1	1
GOTERM_CC_DIRECT	GO:0001741~XY body	1	0.135501	1	MAEL	703	16	20887	1.85695	1	1	1
GOTERM_CC_DIRECT	GO:0035098~ESC/E(Z) complex	1	0.135501	1	JARID2	703	16	20887	1.85695	1	1	1
GOTERM_CC_DIRECT	GO:0032391~photoreceptor connecting cilium	1	0.135501	1	PCDHB15	703	40	20887	0.742781	1	1	1
GOTERM_CC_DIRECT	GO:0101031~protein folding chaperone complex	1	0.135501	1	SDF2L1	703	33	20887	0.900341	1	1	1
GOTERM_CC_DIRECT	GO:0001917~photoreceptor inner segment	1	0.135501	1	DNM1	703	71	20887	0.418468	1	1	1
GOTERM_CC_DIRECT	GO:0097487~multivesicular body, internal vesicle	1	0.135501	1	CD63	703	5	20887	5.94225	1	1	1
GOTERM_CC_DIRECT	GO:0140268~endoplasmic reticulum-plasma membrane contact site	1	0.135501	1	ESYT3	703	12	20887	2.47594	1	1	1
GOTERM_CC_DIRECT	GO:0061829~basal tubulobulbar complex	1	0.135501	1	DNM3	703	1	20887	29.7112	1	1	1
GOTERM_CC_DIRECT	GO:0019898~extrinsic component of membrane	1	0.135501	1	FOLR3	703	30	20887	0.990375	1	1	1
GOTERM_CC_DIRECT	GO:0002116~semaphorin receptor complex	1	0.135501	1	PLXNA4	703	17	20887	1.74772	1	1	1
GOTERM_CC_DIRECT	GO:0099091~postsynaptic specialization, intracellular component	1	0.135501	1	SRC	703	3	20887	9.90375	1	1	1
GOTERM_CC_DIRECT	GO:0098835~presynaptic endocytic zone membrane	1	0.135501	1	DNM1	703	4	20887	7.42781	1	1	1
GOTERM_CC_DIRECT	GO:1904090~peptidase inhibitor complex	1	0.135501	1	CSTA	703	4	20887	7.42781	1	1	1
GOTERM_CC_DIRECT	GO:0005882~intermediate filament	1	0.135501	1	HLA-DRB1	703	133	20887	0.223393	1	1	1
GOTERM_CC_DIRECT	GO:0031094~platelet dense tubular network	1	0.135501	1	ITPR1	703	3	20887	9.90375	1	1	1
GOTERM_CC_DIRECT	GO:0036020~endolysosome membrane	1	0.135501	1	PCSK9	703	20	20887	1.48556	1	1	1
GOTERM_CC_DIRECT	GO:0000159~protein phosphatase type 2A complex	1	0.135501	1	PPP2R2B	703	19	20887	1.56375	1	1	1
GOTERM_CC_DIRECT	GO:0098802~plasma membrane signaling receptor complex	1	0.135501	1	TRAF4	703	9	20887	3.30125	1	1	1
GOTERM_CC_DIRECT	GO:0035861~site of double-strand break	1	0.135501	1	ARPC5	703	102	20887	0.291287	1	1	1
GOTERM_CC_DIRECT	GO:0005871~kinesin complex	1	0.135501	1	KIFC3	703	49	20887	0.606352	1	1	1
GOTERM_CC_DIRECT	GO:1902495~transmembrane transporter complex	1	0.135501	1	CNGB3	703	44	20887	0.675255	1	1	1
GOTERM_CC_DIRECT	GO:0005782~peroxisomal matrix	1	0.135501	1	CRYM	703	52	20887	0.57137	1	1	1
GOTERM_CC_DIRECT	GO:0030686~90S preribosome	1	0.135501	1	CMSS1	703	20	20887	1.48556	1	1	1
GOTERM_CC_DIRECT	GO:0005958~DNA-dependent protein kinase-DNA ligase 4 complex	1	0.135501	1	ATP23	703	7	20887	4.24446	1	1	1
GOTERM_CC_DIRECT	GO:0098691~dopaminergic synapse	1	0.135501	1	CHRNA6	703	15	20887	1.98075	1	1	1
GOTERM_CC_DIRECT	GO:1990667~PCSK9-AnxA2 complex	1	0.135501	1	PCSK9	703	2	20887	14.8556	1	1	1
GOTERM_CC_DIRECT	GO:1990622~CHOP-ATF3 complex	1	0.135501	1	ATF3	703	2	20887	14.8556	1	1	1
GOTERM_CC_DIRECT	GO:0035749~myelin sheath adaxonal region	1	0.135501	1	MAG	703	6	20887	4.95187	1	1	1
GOTERM_CC_DIRECT	GO:0033269~internode region of axon	1	0.135501	1	ERMN	703	4	20887	7.42781	1	1	1
GOTERM_CC_DIRECT	GO:0044232~organelle membrane contact site	1	0.135501	1	ESYT3	703	11	20887	2.70102	1	1	1
GOTERM_CC_DIRECT	GO:0031430~M band	1	0.135501	1	OBSCN	703	28	20887	1.06112	1	1	1
GOTERM_CC_DIRECT	GO:0000421~autophagosome membrane	1	0.135501	1	PRKD1	703	55	20887	0.540204	1	1	1
GOTERM_CC_DIRECT	GO:0097165~nuclear stress granule	1	0.135501	1	RBFOX1	703	6	20887	4.95187	1	1	1
GOTERM_CC_DIRECT	GO:0005790~smooth endoplasmic reticulum	1	0.135501	1	CALR	703	25	20887	1.18845	1	1	1
GOTERM_CC_DIRECT	GO:0031985~Golgi cisterna	1	0.135501	1	GGTA1	703	13	20887	2.28548	1	1	1
GOTERM_CC_DIRECT	GO:1990769~proximal neuron projection	1	0.135501	1	TRIM46	703	4	20887	7.42781	1	1	1
GOTERM_CC_DIRECT	GO:0034673~inhibin-betaglycan-ActRII complex	1	0.135501	1	ACVR2A	703	3	20887	9.90375	1	1	1
GOTERM_CC_DIRECT	GO:0044305~calyx of Held	1	0.135501	1	CPLX2	703	18	20887	1.65062	1	1	1
GOTERM_CC_DIRECT	GO:0005758~mitochondrial intermembrane space	1	0.135501	1	PRELID2	703	87	20887	0.341508	1	1	1
GOTERM_CC_DIRECT	GO:0030135~coated vesicle	1	0.135501	1	CLTCL1	703	3	20887	9.90375	1	1	1
GOTERM_CC_DIRECT	GO:0030117~membrane coat	1	0.135501	1	DNM1	703	16	20887	1.85695	1	1	1
GOTERM_CC_DIRECT	GO:0042720~mitochondrial inner membrane peptidase complex	1	0.135501	1	IMMP2L	703	2	20887	14.8556	1	1	1
GOTERM_CC_DIRECT	GO:1990913~sperm head plasma membrane	1	0.135501	1	ADAM20	703	7	20887	4.24446	1	1	1
GOTERM_CC_DIRECT	GO:0032432~actin filament bundle	1	0.135501	1	RFLNB	703	17	20887	1.74772	1	1	1
GOTERM_CC_DIRECT	GO:0005921~gap junction	1	0.135501	1	GJB2	703	20	20887	1.48556	1	1	1
GOTERM_CC_DIRECT	GO:0005798~Golgi-associated vesicle	1	0.135501	1	ACR	703	16	20887	1.85695	1	1	1
GOTERM_CC_DIRECT	GO:0005608~laminin-3 complex	1	0.135501	1	LAMA3	703	4	20887	7.42781	1	1	1
GOTERM_CC_DIRECT	GO:1990666~PCSK9-LDLR complex	1	0.135501	1	PCSK9	703	2	20887	14.8556	1	1	1
GOTERM_CC_DIRECT	GO:0033176~proton-transporting V-type ATPase complex	1	0.135501	1	ATP6V0A4	703	14	20887	2.12223	1	1	1
GOTERM_CC_DIRECT	GO:0031095~platelet dense tubular network membrane	1	0.135501	1	ITPR1	703	9	20887	3.30125	1	1	1
GOTERM_CC_DIRECT	GO:0005614~interstitial matrix	1	0.135501	1	VIT	703	12	20887	2.47594	1	1	1
GOTERM_CC_DIRECT	GO:0010369~chromocenter	1	0.135501	1	DNMT3B	703	19	20887	1.56375	1	1	1
GOTERM_CC_DIRECT	GO:0005622~intracellular anatomical structure	1	0.135501	1	CAMK1D	703	38	20887	0.781875	1	1	1
GOTERM_CC_DIRECT	GO:0097431~mitotic spindle pole	1	0.135501	1	FAM83B	703	47	20887	0.632154	1	1	1
GOTERM_CC_DIRECT	GO:0000795~synaptonemal complex	1	0.135501	1	FAM9B	703	24	20887	1.23797	1	1	1
GOTERM_CC_DIRECT	GO:0098833~presynaptic endocytic zone	1	0.135501	1	PACSIN1	703	1	20887	29.7112	1	1	1
GOTERM_CC_DIRECT	GO:0046581~intercellular canaliculus	1	0.135501	1	DPP4	703	7	20887	4.24446	1	1	1
GOTERM_CC_DIRECT	GO:0034683~integrin alphav-beta3 complex	1	0.135501	1	PLP1	703	3	20887	9.90375	1	1	1
GOTERM_CC_DIRECT	GO:0016600~flotillin complex	1	0.135501	1	SORBS1	703	9	20887	3.30125	1	1	1
GOTERM_CC_DIRECT	GO:0005610~laminin-5 complex	1	0.135501	1	LAMA3	703	6	20887	4.95187	1	1	1
GOTERM_CC_DIRECT	GO:0000775~chromosome, centromeric region	1	0.135501	1	PKHD1	703	61	20887	0.487069	1	1	1
GOTERM_CC_DIRECT	GO:1990788~GLI-SUFU complex	1	0.135501	1	GLI2	703	4	20887	7.42781	1	1	1
GOTERM_CC_DIRECT	GO:1902937~inward rectifier potassium channel complex	1	0.135501	1	KCNK1	703	2	20887	14.8556	1	1	1
GOTERM_CC_DIRECT	GO:0000776~kinetochore	1	0.135501	1	MEIKIN	703	167	20887	0.177912	1	1	1
GOTERM_CC_DIRECT	GO:0030286~dynein complex	1	0.135501	1	DNAH12	703	22	20887	1.35051	1	1	1
GOTERM_CC_DIRECT	GO:0044306~neuron projection terminus	1	0.135501	1	FLRT1	703	17	20887	1.74772	1	1	1
GOTERM_CC_DIRECT	GO:0019866~organelle inner membrane	1	0.135501	1	NEU4	703	1	20887	29.7112	1	1	1
GOTERM_CC_DIRECT	GO:0032279~asymmetric synapse	1	0.135501	1	GRM7	703	8	20887	3.7139	1	1	1
GOTERM_CC_DIRECT	GO:0031519~PcG protein complex	1	0.135501	1	ZNF534	703	56	20887	0.530558	1	1	1
GOTERM_CC_DIRECT	GO:1990324~collagen type XXVI trimer	1	0.135501	1	COL26A1	703	1	20887	29.7112	1	1	1
GOTERM_CC_DIRECT	GO:0097356~perinucleolar compartment	1	0.135501	1	ZDHHC19	703	5	20887	5.94225	1	1	1
GOTERM_CC_DIRECT	GO:0032154~cleavage furrow	1	0.135501	1	PSD2	703	56	20887	0.530558	1	1	1
GOTERM_CC_DIRECT	GO:1903958~nitric-oxide synthase complex	1	0.135501	1	MTARC1	703	3	20887	9.90375	1	1	1
GOTERM_CC_DIRECT	GO:0030122~AP-2 adaptor complex	1	0.135501	1	STON2	703	11	20887	2.70102	1	1	1
GOTERM_CC_DIRECT	GO:0016514~SWI/SNF complex	1	0.135501	1	BCL7A	703	32	20887	0.928476	1	1	1
GOTERM_CC_DIRECT	GO:0030175~filopodium	1	0.135501	1	ERMN	703	81	20887	0.366805	1	1	1
GOTERM_CC_DIRECT	GO:0016010~dystrophin-associated glycoprotein complex	1	0.135501	1	CAV3	703	16	20887	1.85695	1	1	1
GOTERM_CC_DIRECT	GO:0032993~protein-DNA complex	1	0.135501	1	ST18	703	39	20887	0.761827	1	1	1
GOTERM_CC_DIRECT	GO:0005681~spliceosomal complex	1	0.135501	1	TXNL4B	703	132	20887	0.225085	1	1	1
GOTERM_CC_DIRECT	GO:0070369~beta-catenin-TCF7L2 complex	1	0.135501	1	TCF4	703	3	20887	9.90375	1	1	1
GOTERM_CC_DIRECT	GO:0120103~centriolar subdistal appendage	1	0.135501	1	CCDC61	703	10	20887	2.97112	1	1	1
GOTERM_CC_DIRECT	GO:0071144~heteromeric SMAD protein complex	1	0.135501	1	SMAD1	703	8	20887	3.7139	1	1	1
GOTERM_CC_DIRECT	GO:0031258~lamellipodium membrane	1	0.135501	1	DPP4	703	23	20887	1.29179	1	1	1
GOTERM_CC_DIRECT	GO:0043232~intracellular non-membrane-bounded organelle	1	0.135501	1	FLNB	703	18	20887	1.65062	1	1	1
GOTERM_CC_DIRECT	GO:0005682~U5 snRNP	1	0.135501	1	TXNL4B	703	25	20887	1.18845	1	1	1
GOTERM_CC_DIRECT	GO:0099572~postsynaptic specialization	1	0.135501	1	DLGAP2	703	11	20887	2.70102	1	1	1
GOTERM_CC_DIRECT	GO:0098591~external side of apical plasma membrane	1	0.135501	1	ABCC4	703	6	20887	4.95187	1	1	1
GOTERM_CC_DIRECT	GO:0005652~nuclear lamina	1	0.135501	1	RNF220	703	11	20887	2.70102	1	1	1
GOTERM_CC_DIRECT	GO:0044304~main axon	1	0.135501	1	TRIM46	703	4	20887	7.42781	1	1	1
GOTERM_CC_DIRECT	GO:0014731~spectrin-associated cytoskeleton	1	0.135501	1	ANK3	703	8	20887	3.7139	1	1	1
GOTERM_CC_DIRECT	GO:0070724~BMP receptor complex	1	0.135501	1	ACVR1	703	4	20887	7.42781	1	1	1
GOTERM_CC_DIRECT	GO:0071748~monomeric IgA immunoglobulin complex	1	0.135501	1	JCHAIN	703	4	20887	7.42781	1	1	1
GOTERM_CC_DIRECT	GO:0042583~chromaffin granule	1	0.135501	1	DNM1	703	4	20887	7.42781	1	1	1
GOTERM_CC_DIRECT	GO:0071752~secretory dimeric IgA immunoglobulin complex	1	0.135501	1	JCHAIN	703	3	20887	9.90375	1	1	1
GOTERM_CC_DIRECT	GO:0032809~neuronal cell body membrane	1	0.135501	1	FLRT1	703	29	20887	1.02453	1	1	1
GOTERM_CC_DIRECT	GO:0060091~kinocilium	1	0.135501	1	DCDC2	703	9	20887	3.30125	1	1	1
GOTERM_CC_DIRECT	GO:0044327~dendritic spine head	1	0.135501	1	DNM3	703	8	20887	3.7139	1	1	1
GOTERM_CC_DIRECT	GO:0031904~endosome lumen	1	0.135501	1	CD63	703	23	20887	1.29179	1	1	1
GOTERM_CC_DIRECT	GO:1990972~multimerin complex	1	0.135501	1	MMRN1	703	2	20887	14.8556	1	1	1
GOTERM_CC_DIRECT	GO:0034707~chloride channel complex	1	0.135501	1	CLCN1	703	54	20887	0.550208	1	1	1
GOTERM_CC_DIRECT	GO:1990722~DAPK1-calmodulin complex	1	0.135501	1	DAPK1	703	1	20887	29.7112	1	1	1
GOTERM_CC_DIRECT	GO:0046540~U4/U6 x U5 tri-snRNP complex	1	0.135501	1	TXNL4B	703	45	20887	0.66025	1	1	1
GOTERM_CC_DIRECT	GO:1905286~serine-type peptidase complex	1	0.135501	1	F7	703	2	20887	14.8556	1	1	1
GOTERM_CC_DIRECT	GO:0033179~proton-transporting V-type ATPase, V0 domain	1	0.135501	1	ATP6V0A4	703	10	20887	2.97112	1	1	1
GOTERM_CC_DIRECT	GO:0061702~canonical inflammasome complex	1	0.135501	1	NLRC4	703	9	20887	3.30125	1	1	1
GOTERM_CC_DIRECT	GO:0000220~vacuolar proton-transporting V-type ATPase, V0 domain	1	0.135501	1	ATP6V0A4	703	10	20887	2.97112	1	1	1
GOTERM_CC_DIRECT	GO:0097453~mesaxon	1	0.135501	1	MAG	703	1	20887	29.7112	1	1	1
GOTERM_CC_DIRECT	GO:0071141~SMAD protein complex	1	0.135501	1	SMAD1	703	7	20887	4.24446	1	1	1
GOTERM_CC_DIRECT	GO:0014701~junctional sarcoplasmic reticulum membrane	1	0.135501	1	AKAP6	703	10	20887	2.97112	1	1	1
GOTERM_CC_DIRECT	GO:0043220~Schmidt-Lanterman incisure	1	0.135501	1	MAG	703	11	20887	2.70102	1	1	1
GOTERM_CC_DIRECT	GO:0097543~ciliary inversin compartment	1	0.135501	1	ANKRD63	703	10	20887	2.97112	1	1	1
GOTERM_CC_DIRECT	GO:0072557~IPAF inflammasome complex	1	0.135501	1	NLRC4	703	9	20887	3.30125	1	1	1
GOTERM_CC_DIRECT	GO:0044322~endoplasmic reticulum quality control compartment	1	0.135501	1	CALR	703	16	20887	1.85695	1	1	1
GOTERM_CC_DIRECT	GO:0061827~sperm head	1	0.135501	1	TACR1	703	12	20887	2.47594	1	1	1
GOTERM_CC_DIRECT	GO:0042629~mast cell granule	1	0.135501	1	SRGN	703	3	20887	9.90375	1	1	1
GOTERM_CC_DIRECT	GO:0030137~COPI-coated vesicle	1	0.135501	1	PACSIN1	703	7	20887	4.24446	1	1	1
GOTERM_CC_DIRECT	GO:0120281~autolysosome membrane	1	0.135501	1	HLA-DRB1	703	4	20887	7.42781	1	1	1
GOTERM_CC_DIRECT	GO:0032783~super elongation complex	1	0.135501	1	AFF3	703	5	20887	5.94225	1	1	1
GOTERM_CC_DIRECT	GO:0034399~nuclear periphery	1	0.135501	1	MNDA	703	17	20887	1.74772	1	1	1
GOTERM_CC_DIRECT	GO:0033162~melanosome membrane	1	0.135501	1	OCA2	703	22	20887	1.35051	1	1	1
GOTERM_CC_DIRECT	GO:0097443~sorting endosome	1	0.135501	1	CLTCL1	703	6	20887	4.95187	1	1	1
GOTERM_CC_DIRECT	GO:0005640~nuclear outer membrane	1	0.135501	1	PTGS2	703	33	20887	0.900341	1	1	1
GOTERM_CC_DIRECT	GO:0032449~CBM complex	1	0.135501	1	CARD11	703	5	20887	5.94225	1	1	1
GOTERM_CC_DIRECT	GO:0034364~high-density lipoprotein particle	1	0.135501	1	PLTP	703	24	20887	1.23797	1	1	1
GOTERM_CC_DIRECT	GO:0000137~Golgi cis cisterna	1	0.135501	1	GOLGA8A	703	33	20887	0.900341	1	1	1
GOTERM_CC_DIRECT	GO:0034686~integrin alphav-beta8 complex	1	0.135501	1	ITGB8	703	2	20887	14.8556	1	1	1
GOTERM_CC_DIRECT	GO:0044291~cell-cell contact zone	1	0.135501	1	OPALIN	703	26	20887	1.14274	1	1	1
GOTERM_CC_DIRECT	GO:0071547~piP-body	1	0.135501	1	MAEL	703	5	20887	5.94225	1	1	1
GOTERM_CC_DIRECT	GO:0098590~plasma membrane region	1	0.135501	1	SLC22A12	703	7	20887	4.24446	1	1	1
GOTERM_CC_DIRECT	GO:0033276~transcription factor TFTC complex	1	0.135501	1	SUPT3H	703	18	20887	1.65062	1	1	1
GOTERM_CC_DIRECT	GO:0031252~cell leading edge	1	0.135501	1	CARMIL1	703	56	20887	0.530558	1	1	1
GOTERM_CC_DIRECT	GO:0016581~NuRD complex	1	0.135501	1	DPEP3	703	18	20887	1.65062	1	1	1
GOTERM_CC_DIRECT	GO:0005955~calcineurin complex	1	0.135501	1	ITPR1	703	9	20887	3.30125	1	1	1
GOTERM_CC_DIRECT	GO:0000779~condensed chromosome, centromeric region	1	0.135501	1	MEIKIN	703	17	20887	1.74772	1	1	1
GOTERM_CC_DIRECT	GO:0046930~pore complex	1	0.135501	1	BCL2	703	14	20887	2.12223	1	1	1
GOTERM_CC_DIRECT	GO:0042599~lamellar body	1	0.135501	1	CKAP4	703	9	20887	3.30125	1	1	1
GOTERM_CC_DIRECT	GO:0071756~pentameric IgM immunoglobulin complex	1	0.135501	1	JCHAIN	703	3	20887	9.90375	1	1	1
GOTERM_CC_DIRECT	GO:0097546~ciliary base	1	0.135501	1	GLI2	703	48	20887	0.618984	1	1	1
GOTERM_CC_DIRECT	GO:0097449~astrocyte projection	1	0.135501	1	GJB2	703	11	20887	2.70102	1	1	1
GOTERM_CC_DIRECT	GO:0099092~postsynaptic density, intracellular component	1	0.135501	1	TNIK	703	17	20887	1.74772	1	1	1
GOTERM_CC_DIRECT	GO:1903143~adrenomedullin receptor complex	1	0.135501	1	CALCRL	703	3	20887	9.90375	1	1	1
GOTERM_CC_DIRECT	GO:1902773~GTPase activator complex	1	0.135501	1	GNB5	703	1	20887	29.7112	1	1	1
GOTERM_CC_DIRECT	GO:0033018~sarcoplasmic reticulum lumen	1	0.135501	1	CALR	703	10	20887	2.97112	1	1	1
GOTERM_CC_DIRECT	GO:0097227~sperm annulus	1	0.135501	1	SLC26A8	703	7	20887	4.24446	1	1	1
GOTERM_CC_DIRECT	GO:1990140~molybdopterin synthase complex	1	0.135501	1	MOCS1	703	2	20887	14.8556	1	1	1
GOTERM_CC_DIRECT	GO:0098992~neuronal dense core vesicle	1	0.135501	1	PDYN	703	21	20887	1.41482	1	1	1
GOTERM_CC_DIRECT	GO:0016605~PML body	1	0.135501	1	CIITA	703	111	20887	0.267669	1	1	1
GOTERM_CC_DIRECT	GO:0030055~cell-substrate junction	1	0.135501	1	SORBS1	703	6	20887	4.95187	1	1	1
GOTERM_CC_DIRECT	GO:0042824~MHC class I peptide loading complex	1	0.135501	1	CALR	703	10	20887	2.97112	1	1	1
GOTERM_CC_DIRECT	GO:0000145~exocyst	1	0.135501	1	EXOC3L4	703	18	20887	1.65062	1	1	1
GOTERM_CC_DIRECT	GO:0150001~primary dendrite	1	0.135501	1	MAP1A	703	2	20887	14.8556	1	1	1
GOTERM_CC_DIRECT	GO:0000922~spindle pole	1	0.135501	1	CDC14B	703	146	20887	0.203502	1	1	1
GOTERM_CC_DIRECT	GO:0005922~connexin complex	1	0.135501	1	GJB2	703	21	20887	1.41482	1	1	1
GOTERM_CC_DIRECT	GO:0070554~synaptobrevin 2-SNAP-25-syntaxin-3-complexin complex	1	0.135501	1	CPLX2	703	2	20887	14.8556	1	1	1
GOTERM_CC_DIRECT	GO:0046691~intracellular canaliculus	1	0.135501	1	KCNA5	703	3	20887	9.90375	1	1	1
GOTERM_CC_DIRECT	GO:0044295~axonal growth cone	1	0.135501	1	COBL	703	32	20887	0.928476	1	1	1
GOTERM_CC_DIRECT	GO:0071439~clathrin complex	1	0.135501	1	CLTCL1	703	8	20887	3.7139	1	1	1
GOTERM_CC_DIRECT	GO:0097136~Bcl-2 family protein complex	1	0.135501	1	BCL2	703	9	20887	3.30125	1	1	1
GOTERM_CC_DIRECT	GO:0061828~apical tubulobulbar complex	1	0.135501	1	DNM3	703	1	20887	29.7112	1	1	1
GOTERM_CC_DIRECT	GO:0000791~euchromatin	1	0.135501	1	DNTT	703	64	20887	0.464238	1	1	1
GOTERM_CC_DIRECT	GO:0034045~phagophore assembly site membrane	1	0.135501	1	STBD1	703	23	20887	1.29179	1	1	1
GOTERM_CC_DIRECT	GO:0098894~extrinsic component of presynaptic endocytic zone membrane	1	0.135501	1	DNAJC6	703	4	20887	7.42781	1	1	1
GOTERM_CC_DIRECT	GO:0005840~ribosome	1	0.135501	1	CALR	703	118	20887	0.25179	1	1	1
GOTERM_CC_DIRECT	GO:1902737~dendritic filopodium	1	0.135501	1	SRC	703	7	20887	4.24446	1	1	1
GOTERM_CC_DIRECT	GO:0032426~stereocilium tip	1	0.135501	1	ESPN	703	21	20887	1.41482	1	1	1
GOTERM_CC_DIRECT	GO:0042587~glycogen granule	1	0.135501	1	PPP1R3D	703	6	20887	4.95187	1	1	1
GOTERM_CC_DIRECT	GO:0140288~GBAF complex	1	0.135501	1	BCL7A	703	14	20887	2.12223	1	1	1
GOTERM_CC_DIRECT	GO:0014802~terminal cisterna	1	0.135501	1	FKBP1C	703	4	20887	7.42781	1	1	1
GOTERM_CC_DIRECT	GO:1990425~ryanodine receptor complex	1	0.135501	1	FKBP1C	703	3	20887	9.90375	1	1	1
GOTERM_CC_DIRECT	GO:0070701~mucus layer	1	0.135501	1	MUC5AC	703	2	20887	14.8556	1	1	1
GOTERM_CC_DIRECT	GO:0033268~node of Ranvier	1	0.135501	1	ANK3	703	16	20887	1.85695	1	1	1
GOTERM_CC_DIRECT	GO:0005773~vacuole	1	0.135501	1	GGH	703	15	20887	1.98075	1	1	1
GOTERM_CC_DIRECT	GO:0005892~acetylcholine-gated channel complex	1	0.135501	1	CHRNA6	703	17	20887	1.74772	1	1	1
GOTERM_CC_DIRECT	GO:0001527~microfibril	1	0.135501	1	MFAP2	703	13	20887	2.28548	1	1	1
GOTERM_CC_DIRECT	GO:0000124~SAGA complex	1	0.135501	1	SUPT3H	703	25	20887	1.18845	1	1	1
GOTERM_CC_DIRECT	GO:0002102~podosome	1	0.135501	1	SRC	703	33	20887	0.900341	1	1	1
GOTERM_CC_DIRECT	GO:0043226~organelle	1	0.135501	1	FLNB	703	7	20887	4.24446	1	1	1
GOTERM_CC_DIRECT	GO:0005885~Arp2/3 protein complex	1	0.135501	1	ARPC5	703	14	20887	2.12223	1	1	1
GOTERM_CC_DIRECT	GO:0016471~vacuolar proton-transporting V-type ATPase complex	1	0.135501	1	ATP6V0A4	703	15	20887	1.98075	1	1	1
GOTERM_CC_DIRECT	GO:0036457~keratohyalin granule	1	0.135501	1	HRNR	703	4	20887	7.42781	1	1	1
GOTERM_CC_DIRECT	GO:1990662~S100A9 complex	1	0.135501	1	S100A9	703	1	20887	29.7112	1	1	1
GOTERM_CC_DIRECT	GO:0150053~cerebellar climbing fiber to Purkinje cell synapse	1	0.135501	1	PLXNA4	703	7	20887	4.24446	1	1	1
GOTERM_CC_DIRECT	GO:0045095~keratin filament	1	0.135501	1	FAM83B	703	103	20887	0.288459	1	1	1
GOTERM_CC_DIRECT	GO:0032585~multivesicular body membrane	1	0.135501	1	CD63	703	31	20887	0.958427	1	1	1
GOTERM_CC_DIRECT	GO:0000164~protein phosphatase type 1 complex	1	0.135501	1	PPP1R3D	703	12	20887	2.47594	1	1	1
GOTERM_CC_DIRECT	GO:1990904~ribonucleoprotein complex	1	0.135501	1	HSPA1A	703	210	20887	0.141482	1	1	1
GOTERM_CC_DIRECT	GO:0034751~aryl hydrocarbon receptor complex	1	0.135501	1	AHRR	703	9	20887	3.30125	1	1	1
GOTERM_CC_DIRECT	GO:1990907~beta-catenin-TCF complex	1	0.135501	1	TCF4	703	13	20887	2.28548	1	1	1
GOTERM_CC_DIRECT	GO:0043218~compact myelin	1	0.135501	1	MAG	703	4	20887	7.42781	1	1	1
GOTERM_CC_DIRECT	GO:0097138~BAD-BCL-2 complex	1	0.135501	1	BCL2	703	2	20887	14.8556	1	1	1
GOTERM_CC_DIRECT	GO:0071750~dimeric IgA immunoglobulin complex	1	0.135501	1	JCHAIN	703	1	20887	29.7112	1	1	1
GOTERM_CC_DIRECT	GO:0045180~basal cortex	1	0.135501	1	PHLDB1	703	5	20887	5.94225	1	1	1
GOTERM_CC_DIRECT	GO:0098871~postsynaptic actin cytoskeleton	1	0.135501	1	ITPKA	703	8	20887	3.7139	1	1	1
GOTERM_CC_DIRECT	GO:0030016~myofibril	1	0.135501	1	OBSCN	703	35	20887	0.848893	1	1	1
GOTERM_CC_DIRECT	GO:1990265~platelet-derived growth factor complex	1	0.135501	1	PDGFA	703	2	20887	14.8556	1	1	1
GOTERM_CC_DIRECT	GO:1990357~terminal web	1	0.135501	1	COBL	703	4	20887	7.42781	1	1	1
GOTERM_CC_DIRECT	GO:0000792~heterochromatin	1	0.135501	1	DPEP3	703	49	20887	0.606352	1	1	1
GOTERM_CC_DIRECT	GO:0036157~outer dynein arm	1	0.135501	1	DNAI2	703	11	20887	2.70102	1	1	1
GOTERM_CC_DIRECT	GO:0034704~calcium channel complex	1	0.135501	1	AKAP6	703	27	20887	1.10042	1	1	1
GOTERM_CC_DIRECT	GO:0008023~transcription elongation factor complex	1	0.135501	1	MLLT3	703	22	20887	1.35051	1	1	1
GOTERM_CC_DIRECT	GO:0071546~pi-body	1	0.135501	1	TDRD5	703	10	20887	2.97112	1	1	1
GOTERM_CC_DIRECT	GO:0099524~postsynaptic cytosol	1	0.135501	1	PLCB1	703	13	20887	2.28548	1	1	1
GOTERM_CC_DIRECT	GO:0101004~cytolytic granule membrane	1	0.135501	1	NKG7	703	4	20887	7.42781	1	1	1
GOTERM_CC_DIRECT	GO:0017071~intracellular cyclic nucleotide activated cation channel complex	1	0.135501	1	CNGB3	703	6	20887	4.95187	1	1	1
GOTERM_CC_DIRECT	GO:0044307~dendritic branch	1	0.135501	1	MAP1A	703	3	20887	9.90375	1	1	1
GOTERM_CC_DIRECT	GO:0097542~ciliary tip	1	0.135501	1	GLI2	703	48	20887	0.618984	1	1	1
GOTERM_CC_DIRECT	GO:0005883~neurofilament	1	0.135501	1	DLGAP2	703	10	20887	2.97112	1	1	1
GOTERM_CC_DIRECT	GO:0070033~synaptobrevin 2-SNAP-25-syntaxin-1a-complexin II complex	1	0.135501	1	CPLX2	703	3	20887	9.90375	1	1	1
GOTERM_CC_DIRECT	GO:1902494~catalytic complex	1	0.135501	1	DNMT3B	703	24	20887	1.23797	1	1	1
GOTERM_CC_DIRECT	GO:0071914~prominosome	1	0.135501	1	PROM1	703	2	20887	14.8556	1	1	1
GOTERM_CC_DIRECT	GO:0030868~smooth endoplasmic reticulum membrane	1	0.135501	1	FTCD	703	9	20887	3.30125	1	1	1
GOTERM_CC_DIRECT	GO:0005896~interleukin-6 receptor complex	1	0.135501	1	IL6	703	3	20887	9.90375	1	1	1
GOTERM_CC_DIRECT	GO:0034688~integrin alphaM-beta2 complex	1	0.135501	1	ITGAM	703	2	20887	14.8556	1	1	1
GOTERM_CC_DIRECT	GO:0045334~clathrin-coated endocytic vesicle	1	0.135501	1	CLTCL1	703	26	20887	1.14274	1	1	1
GOTERM_CC_DIRECT	GO:0099512~supramolecular fiber	1	0.135501	1	SNCA	703	3	20887	9.90375	1	1	1
GOTERM_CC_DIRECT	GO:0071142~homomeric SMAD protein complex	1	0.135501	1	SMAD1	703	2	20887	14.8556	1	1	1
GOTERM_CC_DIRECT	GO:0098831~presynaptic active zone cytoplasmic component	1	0.135501	1	GUCY1B1	703	9	20887	3.30125	1	1	1
GOTERM_CC_DIRECT	GO:0043541~UDP-N-acetylglucosamine transferase complex	1	0.135501	1	UGT3A2	703	6	20887	4.95187	1	1	1
GOTERM_CC_DIRECT	GO:0044309~neuron spine	1	0.135501	1	SHANK3	703	6	20887	4.95187	1	1	1
GOTERM_CC_DIRECT	GO:0032281~AMPA glutamate receptor complex	1	0.135501	1	GRIA4	703	26	20887	1.14274	1	1	1
GOTERM_CC_DIRECT	GO:0035371~microtubule plus-end	1	0.135501	1	CLIP2	703	28	20887	1.06112	1	1	1
GOTERM_CC_DIRECT	GO:0120293~dynein axonemal particle	1	0.135501	1	DNAI2	703	20	20887	1.48556	1	1	1
GOTERM_CC_DIRECT	GO:0030849~autosome	1	0.135501	1	MAEL	703	4	20887	7.42781	1	1	1
GOTERM_CC_DIRECT	GO:0097427~microtubule bundle	1	0.135501	1	TPPP3	703	6	20887	4.95187	1	1	1
GOTERM_CC_DIRECT	GO:0071751~secretory IgA immunoglobulin complex	1	0.135501	1	JCHAIN	703	5	20887	5.94225	1	1	1

## Sheet: GO_MF padj<0.05
Category	Term	Count	%	PValue	Genes	List Total	Pop Hits	Pop Total	Fold Enrichment	Bonferroni	Benjamini	FDR
GOTERM_MF_DIRECT	GO:0004252~serine-type endopeptidase activity	23	3.11653	2.07307e-06	TMPRSS11A, RHBDF1, HGF, HTRA4, HP, PCSK9, LRP3, SSC5D, AZU1, MMP8, MMP9, TMPRSS11D, DPP4, ACR, F7, IMMP2L, PROC, ANOS1, CTSG, PRTN3, PRSS2, ELANE, LTF	682	198	19304	3.28795	0.00188472	0.0018865	0.00187199
GOTERM_MF_DIRECT	GO:0005509~calcium ion binding	51	6.91057	1.09257e-05	WDR49, ANXA8L1, PCDHGB2, DOC2B, GRM7, DNER, ANXA8, PRSS2, CALN1, CUBN, EGFL7, PCDHGA5, PCDHGA4, PCDHGA3, ANXA3, PCDHGA2, PCDHGA1, F7, MMRN1, PCDHGB1, PLCB1, S100A9, S100A8, ITPR1, THBS4, NCALD, NKD2, RASGRP3, CRACR2B, SPOCK3, S100A12, CDH24, S100A11, SNCA, AOC1, GCA, EGF, PCDHB15, CABCOCO1, LRP1B, GRIN1, HRNR, EHD2, GJB2, CAPN11, PROC, ESYT3, S100P, DCHS1, CALR, EFCC1	682	746	19304	1.93506	0.00989314	0.00497117	0.00493293
GOTERM_MF_DIRECT	GO:0023026~MHC class II protein complex binding	8	1.08401	3.15932e-05	HLA-DMA, HLA-DRB5, PKM, HLA-DPB1, HLA-DOA, HLA-DRB1, HLA-DQA1, HLA-DPA1	682	27	19304	8.38666	0.0283409	0.00824034	0.00817695
GOTERM_MF_DIRECT	GO:0048018~receptor ligand activity	12	1.62602	3.62213e-05	CD86, SFRP2, TAFA5, NRG3, NRG4, EGF, TAFA1, CTSG, WNT9A, PGLYRP1, HSPA1A, HBEGF	682	71	19304	4.78394	0.0324246	0.00824034	0.00817695
GOTERM_MF_DIRECT	GO:0032395~MHC class II receptor activity	6	0.813008	5.47379e-05	HLA-DMA, HLA-DPB1, HLA-DOA, HLA-DRB1, HLA-DQA1, HLA-DPA1	682	13	19304	13.0638	0.0485925	0.00996229	0.00988566
GOTERM_MF_DIRECT	GO:0008083~growth factor activity	17	2.30352	0.000250375	GPI, EGF, HGF, CLEC11A, LIF, OSM, PDGFA, THBS4, FGF17, IL6, EPGN, IL5, FGF9, NRG3, NRG4, FGF12, HBEGF	682	165	19304	2.91627	0.203772	0.0379735	0.0376814
GOTERM_MF_DIRECT	GO:0008201~heparin binding	18	2.43902	0.000372357	ALK, COL17A1, AOC1, AZU1, MPO, KNG1, THBS4, SFRP1, FGF9, RTN4RL1, ANOS1, CTSG, FGF12, ELANE, RSPO4, HBEGF, FGFR1, LTF	682	188	19304	2.71005	0.287452	0.0484064	0.048034
GOTERM_MF_DIRECT	GO:0005154~epidermal growth factor receptor binding	8	1.08401	0.00106502	VAV3, EPGN, NRG4, EGF, FYN, FAM83B, VAV2, HBEGF	682	46	19304	4.92261	0.620797	0.121146	0.120214
GOTERM_MF_DIRECT	GO:0008236~serine-type peptidase activity	9	1.21951	0.00130131	ACR, DPP4, DPP10, F7, DPP6, CTSG, PRTN3, PRSS2, LTF	682	61	19304	4.17615	0.694242	0.131577	0.130565
GOTERM_MF_DIRECT	GO:0001618~virus receptor activity	10	1.35501	0.00199432	DPP4, CD86, GPR15, EFNB3, MOG, CLEC5A, NECTIN4, HAVCR1, TNFRSF4, HSPA1A	682	80	19304	3.53812	0.837429	0.181483	0.180087
GOTERM_MF_DIRECT	GO:0005515~protein binding	485	65.7182	0.00258258	ROPN1B, CDA, SCT, SLC4A3, CLDN2, BACH2, HTR7, DPYSL4, UBASH3B, DPYSL3, NAMPT, HOXA3, SAMD12, PRSS2, HOXA5, CUBN, MEF2C, RBFOX1, PRKCH, SDS, DAPK1, PRKCE, CLEC11A, TEX55, RNASE2, SYTL4, SULT2B1, ZC2HC1B, DAAM2, MAP1A, ANOS1, PRKCQ, MAML3, PRKD1, NGEF, ATF3, ZBTB8A, PDGFA, FPR2, FAM221B, CRACR2B, CEP70, PRDM16, S100A12, GSG1L, PROM1, NXNL1, HLA-DQA1, S100A11, ELANE, GPR15, COL24A1, RNASE11, AZU1, G…	682	12754	19304	1.07636	0.904934	0.21365	0.212006
GOTERM_MF_DIRECT	GO:0005102~signaling receptor binding	25	3.38753	0.00309259	EDA, MAST4, SCT, SRC, LAMA3, GBA1, KCNA5, KNG1, DPP4, SRPX2, FYN, ICOSLG, EGFL7, YES1, MOG, HGF, LIF, F7, MAG, IL1RAPL1, HLA-DPB1, PRTN3, HCST, HLA-DRB1, HSPA1A	682	369	19304	1.91768	0.940312	0.221523	0.219819
GOTERM_MF_DIRECT	GO:0030297~transmembrane receptor protein tyrosine kinase activator activity	5	0.677507	0.00316461	EPGN, NRG3, EGF, EFNA5, HBEGF	682	18	19304	7.8625	0.94411	0.221523	0.219819
GOTERM_MF_DIRECT	GO:0045028~G protein-coupled purinergic nucleotide receptor activity	4	0.542005	0.00583392	GPR34, P2RY2, GPR87, P2RY14	682	11	19304	10.2927	0.995129	0.379205	0.376288
GOTERM_MF_DIRECT	GO:0008146~sulfotransferase activity	6	0.813008	0.00727233	SULT2B1, SULT1B1, CHST11, UST, GAL3ST2, HS3ST1	682	35	19304	4.85228	0.998696	0.441188	0.437794
GOTERM_MF_DIRECT	GO:0020037~heme binding	13	1.76152	0.00894027	GUCY1A1, GUCY1B1, HBG2, SRC, HBE1, CYP4F3, CYBB, LPO, HBA1, CYP46A1, PTGS2, MPO, CYP2S1	682	155	19304	2.37397	0.999718	0.508478	0.504566
GOTERM_MF_DIRECT	GO:0050786~RAGE receptor binding	4	0.542005	0.00959428	S100A12, S100P, S100A9, S100A8	682	13	19304	8.70923	0.999845	0.513576	0.509626
GOTERM_MF_DIRECT	GO:0044325~transmembrane transporter binding	12	1.62602	0.0151954	DPP10, YES1, CAV3, SRC, FKBP1C, TSPO, SCN7A, AKAP6, FYN, ANK3, FGF12, SCN4B	682	147	19304	2.31061	0.999999	0.767976	0.762069
GOTERM_MF_DIRECT	GO:0045499~chemorepellent activity	5	0.677507	0.0160347	DPP4, SEMA5A, SEMA7A, NRG3, EFNA5	682	28	19304	5.05446	1	0.767976	0.762069
GOTERM_MF_DIRECT	GO:0046875~ephrin receptor binding	5	0.677507	0.0180939	SIPA1L1, EFNB3, SRC, FYN, EFNA5	682	29	19304	4.88017	1	0.823273	0.81694
GOTERM_MF_DIRECT	GO:0035259~nuclear glucocorticoid receptor binding	4	0.542005	0.0205475	NR4A1, NR4A3, FLT3, ETS2	682	17	19304	6.66	1	0.849919	0.843381
GOTERM_MF_DIRECT	GO:0004697~diacylglycerol-dependent serine/threonine kinase activity	4	0.542005	0.0205475	PRKCH, PRKCE, PRKCQ, PRKD1	682	17	19304	6.66	1	0.849919	0.843381
GOTERM_MF_DIRECT	GO:0004601~peroxidase activity	5	0.677507	0.022686	HBG2, HBE1, HBA1, PTGS2, MPO	682	31	19304	4.56532	1	0.879452	0.872687
GOTERM_MF_DIRECT	GO:0050544~arachidonic acid binding	3	0.406504	0.0231943	ALOX5AP, S100A9, S100A8	682	7	19304	12.1307	1	0.879452	0.872687
GOTERM_MF_DIRECT	GO:0042605~peptide antigen binding	7	0.948509	0.0250552	HLA-DMA, HLA-DRB5, HLA-DPB1, HLA-DOA, HLA-DRB1, HLA-DQA1, HLA-DPA1	682	64	19304	3.09586	1	0.896901	0.890002
GOTERM_MF_DIRECT	GO:0048306~calcium-dependent protein binding	8	1.08401	0.0256258	ANXA3, S100A12, S100P, CPNE3, CPLX2, S100A9, S100A8, S100A11	682	82	19304	2.76146	1	0.896901	0.890002
GOTERM_MF_DIRECT	GO:0038023~signaling receptor activity	15	2.03252	0.0288911	CD86, CUBN, GUCY1A1, GUCY1B1, FPR2, F5, GRIN1, PKHD1, MRC2, PRTG, RTN4RL1, P2RY2, CD207, PDCD1, FOLR3	682	225	19304	1.887	1	0.95979	0.952407
GOTERM_MF_DIRECT	GO:0098821~BMP receptor activity	3	0.406504	0.0302114	ACVR1, SOSTDC1, ACVR2A	682	8	19304	10.6144	1	0.95979	0.952407
GOTERM_MF_DIRECT	GO:0004713~protein tyrosine kinase activity	9	1.21951	0.0307474	ALK, PKM, YES1, MUSK, FLT3, SRC, FYN, PTK2, FGFR1	682	104	19304	2.44947	1	0.95979	0.952407
GOTERM_MF_DIRECT	GO:0005525~GTP binding	23	3.11653	0.0316414	GUCY2C, CIITA, GUCY1A1, RAB5B, GUCY1B1, DAPK1, RASL11A, ACSM6, RRAS2, TUBA4B, TUBA4A, GNAI1, RAB33A, DNM1, DNM3, RASD2, EHD2, RASD1, RAB20, GNA12, RAC2, RAB17, MOCS1	682	407	19304	1.59954	1	0.95979	0.952407
GOTERM_MF_DIRECT	GO:0005080~protein kinase C binding	6	0.813008	0.0358206	AVPR1B, SRC, PRKD1, AVPR1A, HDAC9, ADCY6	682	52	19304	3.26596	1	1	0.993399
GOTERM_MF_DIRECT	GO:0004383~guanylate cyclase activity	3	0.406504	0.0379487	GUCY2C, GUCY1A1, GUCY1B1	682	9	19304	9.435	1	1	0.993399
GOTERM_MF_DIRECT	GO:0017046~peptide hormone binding	5	0.677507	0.040404	ACVR1, LHCGR, NPR3, SLC40A1, AVPR1A	682	37	19304	3.825	1	1	0.993399
GOTERM_MF_DIRECT	GO:0017147~Wnt-protein binding	5	0.677507	0.043944	SFRP1, SFRP2, MUSK, EGF, LRP1B	682	38	19304	3.72434	1	1	0.993399
GOTERM_MF_DIRECT	GO:0005544~calcium-dependent phospholipid binding	6	0.813008	0.0440499	ANXA8L1, ANXA3, ESYT3, ANXA8, CPNE3, DOC2B	682	55	19304	3.08782	1	1	0.993399
GOTERM_MF_DIRECT	GO:0005125~cytokine activity	13	1.76152	0.0441405	GPI, EDA, IL15, LIF, OSM, WNT9A, IL6, IL5, TAFA5, IL1B, NAMPT, IFNK, VSTM1	682	195	19304	1.887	1	1	0.993399
GOTERM_MF_DIRECT	GO:0019838~growth factor binding	5	0.677507	0.0476523	RHBDF1, FLT3, SRC, ACVR2A, NKD2	682	39	19304	3.62884	1	1	0.993399
GOTERM_MF_DIRECT	GO:0004714~transmembrane receptor protein tyrosine kinase activity	5	0.677507	0.0476523	ALK, MUSK, FLT3, SRC, TIE1	682	39	19304	3.62884	1	1	0.993399
GOTERM_MF_DIRECT	GO:0004222~metalloendopeptidase activity	9	1.21951	0.0507971	ADAMTS16, ADAM28, ASTL, ATP23, MMP28, ADAM20, MMP8, PRSS2, MMP9	682	115	19304	2.21517	1	1	0.993399
GOTERM_MF_DIRECT	GO:0016595~glutamate binding	3	0.406504	0.0553496	GRM7, GRIN2B, GRIN1	682	11	19304	7.71954	1	1	0.993399
GOTERM_MF_DIRECT	GO:0008233~peptidase activity	8	1.08401	0.0581572	IMMP2L, CAPN11, CTSG, AZU1, MMP8, MMP9, ELANE, TMPRSS11D	682	98	19304	2.31061	1	1	0.993399
GOTERM_MF_DIRECT	GO:0042169~SH2 domain binding	5	0.677507	0.0597809	KHDRBS2, SRC, BLNK, PTK2, FGFR1	682	42	19304	3.36964	1	1	0.993399
GOTERM_MF_DIRECT	GO:0004725~protein tyrosine phosphatase activity	8	1.08401	0.0607747	DUSP5, PTP4A3, UBASH3B, DNAJC6, PTPN20, PTPRM, PTK2, CDC14B	682	99	19304	2.28727	1	1	0.993399
GOTERM_MF_DIRECT	GO:0005178~integrin binding	11	1.49051	0.0614235	SEMA7A, ITGAM, SFRP2, SRC, IL1B, LAMA3, ITGB8, P4HB, CALR, PTK2, THBS4	682	162	19304	1.92194	1	1	0.993399
GOTERM_MF_DIRECT	GO:1990782~protein tyrosine kinase binding	6	0.813008	0.0636415	ACVR1, CEACAM6, CEACAM5, PSG6, BLNK, CEACAM8	682	61	19304	2.7841	1	1	0.993399
GOTERM_MF_DIRECT	GO:0031720~haptoglobin binding	3	0.406504	0.0649042	HBG2, HBE1, HBA1	682	12	19304	7.07625	1	1	0.993399
GOTERM_MF_DIRECT	GO:0043177~organic acid binding	3	0.406504	0.0649042	HBG2, HBE1, HBA1	682	12	19304	7.07625	1	1	0.993399
GOTERM_MF_DIRECT	GO:0001228~DNA-binding transcription activator activity, RNA polymerase II-specific	25	3.38753	0.0699492	CSRNP1, HLF, CEBPE, SATB2, GLI2, MECOM, PRDM16, ZNF521, HOXA5, SMAD1, MEF2C, PBX3, POU4F1, GRHL2, FOXR1, NR4A1, MEIS1, NR4A3, NR6A1, KLF5, WT1, MAFF, TCF4, ATF3, ZNF750	682	493	19304	1.43534	1	1	0.993399
GOTERM_MF_DIRECT	GO:0004126~cytidine deaminase activity	3	0.406504	0.0749606	CDA, APOBEC3H, APOBEC3B	682	13	19304	6.53192	1	1	0.993399
GOTERM_MF_DIRECT	GO:0008270~zinc ion binding	41	5.55556	0.0757856	ZNF331, CDA, BNC2, ADH1C, MT1X, AEBP1, CXXC5, TMEM163, KNG1, GLI2, ZMAT4, MMP28, TRIM46, S100A12, MORC1, PGLYRP1, SNCA, SLC30A8, APOBEC3H, MMP8, GRIN2B, MMP9, MYT1, ST18, ACR, NR4A1, NR4A3, NR6A1, TRAF4, ASTL, WT1, QPCT, MT1F, TRIM58, TRIM15, CALR, S100A9, SHANK3, S100A8, MSRB1, APOBEC3B	682	896	19304	1.29521	1	1	0.993399
GOTERM_MF_DIRECT	GO:0043565~sequence-specific DNA binding	16	2.16802	0.0805584	CSRNP1, HLF, PAX3, CXXC5, GRHL2, POU4F1, ETS2, SCRT1, GLI2, NR6A1, WT1, PRDM16, MAFF, MAEL, BCL2, SPDEF	682	285	19304	1.58905	1	1	0.993399
GOTERM_MF_DIRECT	GO:0042803~protein homodimerization activity	35	4.74255	0.0816061	CDA, NPR3, PDGFA, NLRC4, CST7, PTGS2, CLCN1, JCHAIN, DPP4, MECOM, STOM, CRYM, S100A11, RBM11, ACVR1, CUBN, AOC1, G6PD, SLC30A8, SDS, GCA, RBPMS, GADD45A, DEFA4, DNM1, MAG, PKM, NR4A3, NR6A1, CEACAM5, BCL2, TRIM58, S100P, ATF3, FGFR1	682	750	19304	1.3209	1	1	0.993399
GOTERM_MF_DIRECT	GO:0042802~identical protein binding	73	9.8916	0.084786	ALK, CDA, RHOXF2, SCHIP1, SLC40A1, PTPRM, ADRA1D, MSI2, CLDN2, BOLL, UBASH3B, DPYSL3, NAMPT, TMEM38A, ICOSLG, LHCGR, G6PD, DAPK1, HGF, ACOT12, MMP9, DNM1, DNM3, SFRP1, TRAF4, CEACAM6, CEACAM5, TFF3, PRKD1, KIFC3, PLCB1, PDE9A, ATF3, TAMALIN, CEBPE, HTRA4, PDGFA, NLRC4, FHIT, DPP4, PRTG, SRPX2, ZMAT4, CEP70, STAT4, S100A12, STOM, SH3BP4, FLNB, FYN, PACSIN1, SNCA, WWOX, SMAD1, NPM2, ANGPT1, CAVIN1,…	682	1737	19304	1.18956	1	1	0.993399
GOTERM_MF_DIRECT	GO:0003785~actin monomer binding	4	0.542005	0.0878523	TMSB4X, TMSB15B, PRKCE, COBL	682	30	19304	3.774	1	1	0.993399
GOTERM_MF_DIRECT	GO:0031005~filamin binding	3	0.406504	0.0963926	DPYSL4, DPYSL3, RFLNB	682	15	19304	5.661	1	1	0.993399
GOTERM_MF_DIRECT	GO:0015631~tubulin binding	6	0.813008	0.100772	TTLL6, TPPP3, TPPP2, MAP1A, NCALD, TTLL9	682	70	19304	2.42614	1	1	0.993399
GOTERM_MF_DIRECT	GO:0140351~glycosylceramide flippase activity	2	0.271003	0.102148	ATP10B, ATP10A	682	3	19304	18.87	1	1	0.993399
GOTERM_MF_DIRECT	GO:0004699~diacylglycerol-dependent, calcium-independent serine/threonine kinase activity	2	0.271003	0.102148	PRKCH, PRKCE	682	3	19304	18.87	1	1	0.993399
GOTERM_MF_DIRECT	GO:0004768~stearoyl-CoA 9-desaturase activity	2	0.271003	0.102148	SCD, SCD5	682	3	19304	18.87	1	1	0.993399
GOTERM_MF_DIRECT	GO:0038177~death receptor agonist activity	2	0.271003	0.102148	EDA, HSPA1A	682	3	19304	18.87	1	1	0.993399
GOTERM_MF_DIRECT	GO:0005344~oxygen carrier activity	3	0.406504	0.107682	HBG2, HBE1, HBA1	682	16	19304	5.30718	1	1	0.993399
GOTERM_MF_DIRECT	GO:0140313~molecular sequestering activity	3	0.406504	0.107682	TCN1, TRIM15, CALR	682	16	19304	5.30718	1	1	0.993399
GOTERM_MF_DIRECT	GO:0004016~adenylate cyclase activity	3	0.406504	0.107682	GUCY2C, GUCY1B1, ADCY6	682	16	19304	5.30718	1	1	0.993399
GOTERM_MF_DIRECT	GO:0030159~signaling receptor complex adaptor activity	4	0.542005	0.109446	ROPN1B, SORBS1, GNB5, SHB	682	33	19304	3.43091	1	1	0.993399
GOTERM_MF_DIRECT	GO:0038024~cargo receptor activity	4	0.542005	0.109446	CUBN, ITGAM, STBD1, FPR2	682	33	19304	3.43091	1	1	0.993399
GOTERM_MF_DIRECT	GO:0019899~enzyme binding	19	2.57453	0.10995	WWOX, YES1, PRKCH, NPM2, SRC, PRKCE, PTGS2, TRAF4, SLPI, TMSB4X, STBD1, ALOX5AP, BLNK, TSPAN5, FYN, PRTN3, P4HB, PLCB1, HSPA1A	682	372	19304	1.44568	1	1	0.993399
GOTERM_MF_DIRECT	GO:0045182~translation regulator activity	3	0.406504	0.1193	PRKCH, IGF2BP3, IGF2BP2	682	17	19304	4.995	1	1	0.993399
GOTERM_MF_DIRECT	GO:0005201~extracellular matrix structural constituent	8	1.08401	0.119987	SRPX2, MMRN1, COL24A1, LAMA3, MFAP2, ANOS1, AEBP1, MUC5AC	682	117	19304	1.93538	1	1	0.993399
GOTERM_MF_DIRECT	GO:0001784~phosphotyrosine residue binding	5	0.677507	0.122465	BCAR3, YES1, FYN, SHB, VAV2	682	54	19304	2.62083	1	1	0.993399
GOTERM_MF_DIRECT	GO:0042277~peptide binding	5	0.677507	0.128615	MAS1, AVPR1B, NPR3, AVPR1A, CALR	682	55	19304	2.57318	1	1	0.993399
GOTERM_MF_DIRECT	GO:0004869~cysteine-type endopeptidase inhibitor activity	4	0.542005	0.132845	CSTA, CST7, KNG1, LTF	682	36	19304	3.145	1	1	0.993399
GOTERM_MF_DIRECT	GO:0001635~calcitonin gene-related peptide receptor activity	2	0.271003	0.133827	CALCRL, RAMP1	682	4	19304	14.1525	1	1	0.993399
GOTERM_MF_DIRECT	GO:0034189~very-low-density lipoprotein particle binding	2	0.271003	0.133827	PCSK9, PLTP	682	4	19304	14.1525	1	1	0.993399
GOTERM_MF_DIRECT	GO:0035662~Toll-like receptor 4 binding	2	0.271003	0.133827	S100A9, S100A8	682	4	19304	14.1525	1	1	0.993399
GOTERM_MF_DIRECT	GO:0005124~scavenger receptor binding	2	0.271003	0.133827	GBA1, FPR2	682	4	19304	14.1525	1	1	0.993399
GOTERM_MF_DIRECT	GO:0045296~cadherin binding	17	2.30352	0.135214	ACVR1, SRC, PTPRM, ANK3, OLFM4, EHD2, PPFIBP1, OBSCN, PKM, GPRC5A, CDH24, DCHS1, FLNB, S100P, PROM1, MB21D2, HSPA1A	682	335	19304	1.43637	1	1	0.993399
GOTERM_MF_DIRECT	GO:0005096~GTPase activator activity	15	2.03252	0.135829	VAV3, DOCK3, RGPD6, RASAL1, ASAP2, ARHGAP26, RASGRP3, ARHGAP22, NR4A3, SIPA1L1, CHN2, GNB5, PLCB1, DOCK1, RGS6	682	286	19304	1.48453	1	1	0.993399
GOTERM_MF_DIRECT	GO:0005516~calmodulin binding	12	1.62602	0.139359	AKAP12, MARCKSL1, OBSCN, CAMK1D, ARPP21, DAPK1, MYO5C, ITPKA, AEBP1, ATP2B1, PLCB1, GRIN1	682	215	19304	1.57981	1	1	0.993399
GOTERM_MF_DIRECT	GO:0003779~actin binding	15	2.03252	0.1403	SORBS1, ESPN, PTK2, NCALD, PDLIM1, ABLIM1, SYNPO2L, DAAM2, MAP1A, FLNB, PHACTR1, P4HB, SHANK3, MSRB1, SNCA	682	287	19304	1.47935	1	1	0.993399
GOTERM_MF_DIRECT	GO:0017124~SH3 domain binding	8	1.08401	0.157762	KHDRBS2, DOCK3, DNAJC6, DPYSL3, SH3BP5, ESPN, DOCK1, SHANK3	682	126	19304	1.79714	1	1	0.993399
GOTERM_MF_DIRECT	GO:0005507~copper ion binding	5	0.677507	0.161174	ACR, AOC1, S100A12, F5, SNCA	682	60	19304	2.35875	1	1	0.993399
GOTERM_MF_DIRECT	GO:0030197~extracellular matrix constituent, lubricant activity	2	0.271003	0.16439	MUC4, MUC5AC	682	5	19304	11.322	1	1	0.993399
GOTERM_MF_DIRECT	GO:0030547~signaling receptor inhibitor activity	2	0.271003	0.16439	FKBP1C, PCSK9	682	5	19304	11.322	1	1	0.993399
GOTERM_MF_DIRECT	GO:0047961~glycine N-acyltransferase activity	2	0.271003	0.16439	GLYATL1, GLYAT	682	5	19304	11.322	1	1	0.993399
GOTERM_MF_DIRECT	GO:0140825~lactoperoxidase activity	2	0.271003	0.16439	LPO, MPO	682	5	19304	11.322	1	1	0.993399
GOTERM_MF_DIRECT	GO:0140345~phosphatidylcholine flippase activity	2	0.271003	0.16439	ATP10B, ATP10A	682	5	19304	11.322	1	1	0.993399
GOTERM_MF_DIRECT	GO:0001530~lipopolysaccharide binding	4	0.542005	0.166409	NR4A1, BPI, RNASE3, LTF	682	40	19304	2.8305	1	1	0.993399
GOTERM_MF_DIRECT	GO:0031072~heat shock protein binding	5	0.677507	0.174964	ITGAM, DNAJC6, SSUH2, PRKD1, HSPA1A	682	62	19304	2.28266	1	1	0.993399
GOTERM_MF_DIRECT	GO:0005547~phosphatidylinositol-3,4,5-trisphosphate binding	4	0.542005	0.175159	ANXA8L1, OBSCN, ANXA8, DNM1	682	41	19304	2.76146	1	1	0.993399
GOTERM_MF_DIRECT	GO:0004993~G protein-coupled serotonin receptor activity	3	0.406504	0.181094	HRH1, HTR7, HTR1F	682	22	19304	3.85977	1	1	0.993399
GOTERM_MF_DIRECT	GO:0047555~3',5'-cyclic-GMP phosphodiesterase activity	3	0.406504	0.181094	PDE6H, PDE7B, PDE9A	682	22	19304	3.85977	1	1	0.993399
GOTERM_MF_DIRECT	GO:0010314~phosphatidylinositol-5-phosphate binding	3	0.406504	0.181094	OBSCN, VEPH1, PLEKHA5	682	22	19304	3.85977	1	1	0.993399
GOTERM_MF_DIRECT	GO:0004867~serine-type endopeptidase inhibitor activity	7	0.948509	0.1822	SERPINB10, SLPI, CD109, PZP, ANOS1, SERPINI2, WFDC1	682	108	19304	1.83458	1	1	0.993399
GOTERM_MF_DIRECT	GO:0030165~PDZ domain binding	6	0.813008	0.193193	SLC22A12, TMEM88B, TAMALIN, GRM7, ATP2B1, ACVR2A	682	87	19304	1.95207	1	1	0.993399
GOTERM_MF_DIRECT	GO:0031802~type 5 metabotropic glutamate receptor binding	2	0.271003	0.193876	DNM3, FYN	682	6	19304	9.435	1	1	0.993399
GOTERM_MF_DIRECT	GO:0141038~phosphatidylinositol 3-kinase activator activity	2	0.271003	0.193876	FLT3, PRKD1	682	6	19304	9.435	1	1	0.993399
GOTERM_MF_DIRECT	GO:0140948~histone H3K9 monomethyltransferase activity	2	0.271003	0.193876	MECOM, PRDM16	682	6	19304	9.435	1	1	0.993399
GOTERM_MF_DIRECT	GO:0071253~connexin binding	2	0.271003	0.193876	CAV3, SRC	682	6	19304	9.435	1	1	0.993399
GOTERM_MF_DIRECT	GO:0033691~sialic acid binding	3	0.406504	0.193978	MAG, SIGLEC14, SIGLEC5	682	23	19304	3.69195	1	1	0.993399
GOTERM_MF_DIRECT	GO:0043274~phospholipase binding	3	0.406504	0.193978	SRC, BLNK, FYN	682	23	19304	3.69195	1	1	0.993399
GOTERM_MF_DIRECT	GO:0015271~outward rectifier potassium channel activity	3	0.406504	0.193978	KCNK12, KCNA5, KCNK1	682	23	19304	3.69195	1	1	0.993399
GOTERM_MF_DIRECT	GO:1990837~sequence-specific double-stranded DNA binding	25	3.38753	0.19406	RHOXF2, HLF, CEBPE, GFI1, ETS2, BACH2, GLI2, HOXA2, HOXA6, HOXA5, HOXA4, SPDEF, MEF2C, PAX3, POU4F1, SCRT1, FOXR1, NR4A1, NR6A1, KLF5, MAFF, SNAI1, TCF4, NANOG, ATF3	682	560	19304	1.26362	1	1	0.993399
GOTERM_MF_DIRECT	GO:0031681~G-protein beta-subunit binding	3	0.406504	0.206972	RASD2, RASD1, GNG4	682	24	19304	3.53812	1	1	0.993399
GOTERM_MF_DIRECT	GO:0004866~endopeptidase inhibitor activity	4	0.542005	0.211319	SLPI, CD109, PZP, CST7	682	45	19304	2.516	1	1	0.993399
GOTERM_MF_DIRECT	GO:0005085~guanyl-nucleotide exchange factor activity	12	1.62602	0.212127	VAV3, BCAR3, OBSCN, DOCK3, PSD2, RASGEF1B, EGF, SH3BP5, DOCK1, NGEF, VAV2, RASGRP3	682	236	19304	1.43924	1	1	0.993399
GOTERM_MF_DIRECT	GO:0004715~non-membrane spanning protein tyrosine kinase activity	4	0.542005	0.220603	YES1, SRC, FYN, PTK2	682	46	19304	2.4613	1	1	0.993399
GOTERM_MF_DIRECT	GO:0005000~vasopressin receptor activity	2	0.271003	0.222323	AVPR1B, AVPR1A	682	7	19304	8.08714	1	1	0.993399
GOTERM_MF_DIRECT	GO:0031721~hemoglobin alpha binding	2	0.271003	0.222323	HBG2, HBE1	682	7	19304	8.08714	1	1	0.993399
GOTERM_MF_DIRECT	GO:0034634~glutathione transmembrane transporter activity	2	0.271003	0.222323	ABCC4, ABCC1	682	7	19304	8.08714	1	1	0.993399
GOTERM_MF_DIRECT	GO:0016812~hydrolase activity, acting on carbon-nitrogen (but not peptide) bonds, in cyclic amides	2	0.271003	0.222323	DPYSL4, DPYSL3	682	7	19304	8.08714	1	1	0.993399
GOTERM_MF_DIRECT	GO:0140947~histone H3K9me2 methyltransferase activity	2	0.271003	0.222323	MECOM, PRDM16	682	7	19304	8.08714	1	1	0.993399
GOTERM_MF_DIRECT	GO:0005506~iron ion binding	8	1.08401	0.22556	SCD, CYP2S1, CYP4F3, SCD5, CALR, HBA1, CYP46A1, LTF	682	140	19304	1.61743	1	1	0.993399
GOTERM_MF_DIRECT	GO:0005518~collagen binding	5	0.677507	0.226029	MRC2, SPOCK3, PDGFA, AEBP1, MMP9	682	69	19304	2.05109	1	1	0.993399
GOTERM_MF_DIRECT	GO:0003824~catalytic activity	4	0.542005	0.229967	MTARC1, FHIT, FTCD, SUGCT	682	47	19304	2.40893	1	1	0.993399
GOTERM_MF_DIRECT	GO:0004683~calmodulin-dependent protein kinase activity	3	0.406504	0.233201	CAMK1D, DAPK1, ITPKA	682	26	19304	3.26596	1	1	0.993399
GOTERM_MF_DIRECT	GO:0015431~ABC-type glutathione S-conjugate transporter activity	2	0.271003	0.249768	ABCC4, ABCC1	682	8	19304	7.07625	1	1	0.993399
GOTERM_MF_DIRECT	GO:0015085~calcium ion transmembrane transporter activity	2	0.271003	0.249768	ITPR1, ATP2B1	682	8	19304	7.07625	1	1	0.993399
GOTERM_MF_DIRECT	GO:0004972~NMDA glutamate receptor activity	2	0.271003	0.249768	GRIN2B, GRIN1	682	8	19304	7.07625	1	1	0.993399
GOTERM_MF_DIRECT	GO:0004675~transmembrane receptor protein serine/threonine kinase activity	2	0.271003	0.249768	ACVR1, ACVR2A	682	8	19304	7.07625	1	1	0.993399
GOTERM_MF_DIRECT	GO:0047035~testosterone dehydrogenase (NAD+) activity	2	0.271003	0.249768	HSD17B2, AKR1C4	682	8	19304	7.07625	1	1	0.993399
GOTERM_MF_DIRECT	GO:0043014~alpha-tubulin binding	4	0.542005	0.258459	CAV3, FYN, NCALD, SNCA	682	50	19304	2.2644	1	1	0.993399
GOTERM_MF_DIRECT	GO:0004175~endopeptidase activity	5	0.677507	0.272401	IMMP2L, HTRA4, MMP8, MMP9, ELANE	682	75	19304	1.887	1	1	0.993399
GOTERM_MF_DIRECT	GO:0008266~poly(U) RNA binding	3	0.406504	0.272832	KHDRBS2, MSI2, RBM11	682	29	19304	2.9281	1	1	0.993399
GOTERM_MF_DIRECT	GO:0022849~glutamate-gated calcium ion channel activity	2	0.271003	0.276245	GRIN2B, GRIN1	682	9	19304	6.29	1	1	0.993399
GOTERM_MF_DIRECT	GO:2001069~glycogen binding	2	0.271003	0.276245	STBD1, PPP1R3D	682	9	19304	6.29	1	1	0.993399
GOTERM_MF_DIRECT	GO:1990050~phosphatidic acid transfer activity	2	0.271003	0.276245	PRELID2, PLTP	682	9	19304	6.29	1	1	0.993399
GOTERM_MF_DIRECT	GO:0005388~P-type calcium transporter activity	2	0.271003	0.276245	ATP2B1, ATP2C2	682	9	19304	6.29	1	1	0.993399
GOTERM_MF_DIRECT	GO:0015143~urate transmembrane transporter activity	2	0.271003	0.276245	SLC22A12, ABCC4	682	9	19304	6.29	1	1	0.993399
GOTERM_MF_DIRECT	GO:0016810~hydrolase activity, acting on carbon-nitrogen (but not peptide) bonds	2	0.271003	0.276245	DPYSL4, DPYSL3	682	9	19304	6.29	1	1	0.993399
GOTERM_MF_DIRECT	GO:0031210~phosphatidylcholine binding	3	0.406504	0.286045	ESYT3, PLTP, JCHAIN	682	30	19304	2.8305	1	1	0.993399
GOTERM_MF_DIRECT	GO:0008092~cytoskeletal protein binding	4	0.542005	0.287381	ALDOC, ANK3, SORBS1, PACSIN1	682	53	19304	2.13623	1	1	0.993399
GOTERM_MF_DIRECT	GO:0019003~GDP binding	5	0.677507	0.288218	RAB5B, RRAS2, RAB17, GNAI1, DNM1	682	77	19304	1.83799	1	1	0.993399
GOTERM_MF_DIRECT	GO:0001227~DNA-binding transcription repressor activity, RNA polymerase II-specific	16	2.16802	0.292105	ZBTB8A, ZBTB46, GFI1, AEBP1, POU4F1, ETS2, BACH2, SCRT1, FOXR1, PRDM16, SNAI1, HOXA2, GTF2IRD1, NANOG, ATF3, ZNF750	682	361	19304	1.25451	1	1	0.993399
GOTERM_MF_DIRECT	GO:0030246~carbohydrate binding	10	1.35501	0.294315	CHODL, GRIFIN, MRC2, MAG, SIGLEC14, CLEC11A, CLEC5A, CD207, CALR, SIGLEC5	682	204	19304	1.3875	1	1	0.993399
GOTERM_MF_DIRECT	GO:0004879~nuclear receptor activity	4	0.542005	0.297082	NR4A1, NR6A1, NR4A3, AHRR	682	54	19304	2.09667	1	1	0.993399
GOTERM_MF_DIRECT	GO:0001968~fibronectin binding	3	0.406504	0.299232	SFRP2, MFAP2, SSC5D	682	31	19304	2.73919	1	1	0.993399
GOTERM_MF_DIRECT	GO:0043325~phosphatidylinositol-3,4-bisphosphate binding	3	0.406504	0.299232	ANXA8L1, OBSCN, ANXA8	682	31	19304	2.73919	1	1	0.993399
GOTERM_MF_DIRECT	GO:0004862~cAMP-dependent protein kinase inhibitor activity	2	0.271003	0.30179	PKIB, PRKAG2	682	10	19304	5.661	1	1	0.993399
GOTERM_MF_DIRECT	GO:0043225~ATPase-coupled inorganic anion transmembrane transporter activity	2	0.271003	0.30179	ABCC4, ABCC1	682	10	19304	5.661	1	1	0.993399
GOTERM_MF_DIRECT	GO:0097367~carbohydrate derivative binding	2	0.271003	0.30179	GPI, GFPT2	682	10	19304	5.661	1	1	0.993399
GOTERM_MF_DIRECT	GO:0031419~cobalamin binding	2	0.271003	0.30179	CUBN, TCN1	682	10	19304	5.661	1	1	0.993399
GOTERM_MF_DIRECT	GO:0015485~cholesterol binding	4	0.542005	0.306802	SULT2B1, OSBPL3, TSPO, PROM1	682	55	19304	2.05854	1	1	0.993399
GOTERM_MF_DIRECT	GO:0030594~neurotransmitter receptor activity	3	0.406504	0.312379	HRH1, HTR7, HTR1F	682	32	19304	2.65359	1	1	0.993399
GOTERM_MF_DIRECT	GO:0015643~toxic substance binding	2	0.271003	0.326434	GUCY2C, AZU1	682	11	19304	5.14636	1	1	0.993399
GOTERM_MF_DIRECT	GO:0048185~activin binding	2	0.271003	0.326434	ACVR1, ACVR2A	682	11	19304	5.14636	1	1	0.993399
GOTERM_MF_DIRECT	GO:0016004~phospholipase activator activity	2	0.271003	0.326434	SRC, FYN	682	11	19304	5.14636	1	1	0.993399
GOTERM_MF_DIRECT	GO:0008417~fucosyltransferase activity	2	0.271003	0.326434	FUT2, FUT4	682	11	19304	5.14636	1	1	0.993399
GOTERM_MF_DIRECT	GO:0046974~histone H3K9 methyltransferase activity	2	0.271003	0.326434	MECOM, PRDM16	682	11	19304	5.14636	1	1	0.993399
GOTERM_MF_DIRECT	GO:0050998~nitric-oxide synthase binding	2	0.271003	0.326434	DNM3, CAV3	682	11	19304	5.14636	1	1	0.993399
GOTERM_MF_DIRECT	GO:0035374~chondroitin sulfate binding	2	0.271003	0.326434	RTN4RL1, DPYSL3	682	11	19304	5.14636	1	1	0.993399
GOTERM_MF_DIRECT	GO:0004722~protein serine/threonine phosphatase activity	4	0.542005	0.336002	LRRC18, PPP1R3D, PPM1J, CDC14B	682	58	19304	1.95207	1	1	0.993399
GOTERM_MF_DIRECT	GO:0003700~DNA-binding transcription factor activity	22	2.98103	0.341282	CSRNP1, SMAD1, MEF2C, GFI1, PBX3, PAX3, AFF3, GRHL2, MYT1, ETS2, SCRT1, GLI2, MECOM, ZNF618, WT1, PRDM16, STAT4, GTF2IRD1, TCF4, NANOG, HOXA5, ATF3	682	536	19304	1.16177	1	1	0.993399
GOTERM_MF_DIRECT	GO:0003777~microtubule motor activity	4	0.542005	0.345729	DNAI2, KIF26B, STARD9, KIFC3	682	59	19304	1.91898	1	1	0.993399
GOTERM_MF_DIRECT	GO:0015026~coreceptor activity	4	0.542005	0.345729	CD86, GPR15, RAMP1, ACVR2A	682	59	19304	1.91898	1	1	0.993399
GOTERM_MF_DIRECT	GO:0070740~tubulin-glutamic acid ligase activity	2	0.271003	0.350209	TTLL6, TTLL9	682	12	19304	4.7175	1	1	0.993399
GOTERM_MF_DIRECT	GO:0008179~adenylate cyclase binding	2	0.271003	0.350209	AKAP12, AKAP6	682	12	19304	4.7175	1	1	0.993399
GOTERM_MF_DIRECT	GO:0016594~glycine binding	2	0.271003	0.350209	GRIN2B, GRIN1	682	12	19304	4.7175	1	1	0.993399
GOTERM_MF_DIRECT	GO:0120283~protein serine/threonine kinase binding	2	0.271003	0.350209	DNM3, PRKCH	682	12	19304	4.7175	1	1	0.993399
GOTERM_MF_DIRECT	GO:0060090~molecular adaptor activity	9	1.21951	0.350692	RBPMS, CAV3, BCL2, AKAP6, PGLYRP1, MLLT3, DLGAP2, NKD2, SNCA	682	189	19304	1.34786	1	1	0.993399
GOTERM_MF_DIRECT	GO:0051117~ATPase binding	5	0.677507	0.352406	LHCGR, SDF2L1, SRC, ATP6V0A4, NKD2	682	85	19304	1.665	1	1	0.993399
GOTERM_MF_DIRECT	GO:0000976~transcription cis-regulatory region binding	11	1.49051	0.362522	MEF2C, CIITA, ZBTB8A, WT1, ZBTB46, GFI1, PRDM16, AHRR, NANOG, ATF3, SNCA	682	244	19304	1.27604	1	1	0.993399
GOTERM_MF_DIRECT	GO:0017080~sodium channel regulator activity	3	0.406504	0.364303	CAV3, FGF12, SCN4B	682	36	19304	2.35875	1	1	0.993399
GOTERM_MF_DIRECT	GO:0019888~protein phosphatase regulator activity	3	0.406504	0.364303	PPP1R16B, PPP2R2B, GNA12	682	36	19304	2.35875	1	1	0.993399
GOTERM_MF_DIRECT	GO:0044877~protein-containing complex binding	14	1.89702	0.367177	CARMIL1, CIITA, GUCY1B1, CAV3, FLT3, CEBPE, HBE1, GRIN1, ALOX5AP, NDUFAF2, PLP1, CNGB3, MB21D2, EPHB1	682	327	19304	1.21183	1	1	0.993399
GOTERM_MF_DIRECT	GO:0001540~amyloid-beta binding	5	0.677507	0.368532	ITGAM, FPR2, GRIN2B, GRIN1, GRIA4	682	87	19304	1.62672	1	1	0.993399
GOTERM_MF_DIRECT	GO:0071837~HMG box domain binding	2	0.271003	0.373146	HOXA3, PAX3	682	13	19304	4.35461	1	1	0.993399
GOTERM_MF_DIRECT	GO:0019992~diacylglycerol binding	2	0.271003	0.373146	PLTP, RASGRP3	682	13	19304	4.35461	1	1	0.993399
GOTERM_MF_DIRECT	GO:0008237~metallopeptidase activity	4	0.542005	0.374807	ADAM28, ADAM20, AMZ1, MMP9	682	62	19304	1.82613	1	1	0.993399
GOTERM_MF_DIRECT	GO:0005546~phosphatidylinositol-4,5-bisphosphate binding	5	0.677507	0.376587	ANXA8L1, OBSCN, ANXA8, PLCB1, DNM1	682	88	19304	1.60824	1	1	0.993399
GOTERM_MF_DIRECT	GO:0019825~oxygen binding	3	0.406504	0.377063	HBG2, HBE1, HBA1	682	37	19304	2.295	1	1	0.993399
GOTERM_MF_DIRECT	GO:0004860~protein kinase inhibitor activity	3	0.406504	0.377063	SH3BP5, TRIB3, SNCA	682	37	19304	2.295	1	1	0.993399
GOTERM_MF_DIRECT	GO:0051219~phosphoprotein binding	3	0.406504	0.377063	UBASH3B, SRC, SNCA	682	37	19304	2.295	1	1	0.993399
GOTERM_MF_DIRECT	GO:0008017~microtubule binding	12	1.62602	0.384883	DNM3, CLIP2, KIF26B, MAP1A, STARD9, KIFC3, S100A9, S100A8, FTCD, CCDC61, DNM1, JAKMIP2	682	277	19304	1.22621	1	1	0.993399
GOTERM_MF_DIRECT	GO:0008528~G protein-coupled peptide receptor activity	3	0.406504	0.389716	LHCGR, CYSLTR2, NPR3	682	38	19304	2.2346	1	1	0.993399
GOTERM_MF_DIRECT	GO:0005092~GDP-dissociation inhibitor activity	2	0.271003	0.395275	GPSM1, SH3BP4	682	14	19304	4.04357	1	1	0.993399
GOTERM_MF_DIRECT	GO:0061133~endopeptidase activator activity	2	0.271003	0.395275	SFRP2, NLRC4	682	14	19304	4.04357	1	1	0.993399
GOTERM_MF_DIRECT	GO:1990247~N6-methyladenosine-containing RNA reader activity	2	0.271003	0.395275	IGF2BP3, IGF2BP2	682	14	19304	4.04357	1	1	0.993399
GOTERM_MF_DIRECT	GO:0008559~ABC-type xenobiotic transporter activity	2	0.271003	0.395275	ABCC4, ABCC1	682	14	19304	4.04357	1	1	0.993399
GOTERM_MF_DIRECT	GO:0015562~efflux transmembrane transporter activity	2	0.271003	0.395275	ABCC4, ABCC1	682	14	19304	4.04357	1	1	0.993399
GOTERM_MF_DIRECT	GO:0005542~folic acid binding	2	0.271003	0.395275	FOLR3, FTCD	682	14	19304	4.04357	1	1	0.993399
GOTERM_MF_DIRECT	GO:0004864~protein phosphatase inhibitor activity	3	0.406504	0.402252	PPP1R27, PPP1R1C, PHACTR1	682	39	19304	2.17731	1	1	0.993399
GOTERM_MF_DIRECT	GO:0002020~protease binding	6	0.813008	0.403559	ACR, DPP4, CSTA, PZP, BCL2, ELANE	682	118	19304	1.43924	1	1	0.993399
GOTERM_MF_DIRECT	GO:0015267~channel activity	2	0.271003	0.416624	BCL2, CLDN2	682	15	19304	3.774	1	1	0.993399
GOTERM_MF_DIRECT	GO:0005536~D-glucose binding	2	0.271003	0.416624	HK3, G6PD	682	15	19304	3.774	1	1	0.993399
GOTERM_MF_DIRECT	GO:0030247~polysaccharide binding	2	0.271003	0.416624	STBD1, HLA-DRB1	682	15	19304	3.774	1	1	0.993399
GOTERM_MF_DIRECT	GO:0030553~cGMP binding	2	0.271003	0.416624	PDE6H, CNGB3	682	15	19304	3.774	1	1	0.993399
GOTERM_MF_DIRECT	GO:0016208~AMP binding	2	0.271003	0.416624	MPPED2, PRKAG2	682	15	19304	3.774	1	1	0.993399
GOTERM_MF_DIRECT	GO:0001664~G protein-coupled receptor binding	4	0.542005	0.422613	TAFA5, SCT, GNAI1, HSPA1A	682	67	19304	1.68985	1	1	0.993399
GOTERM_MF_DIRECT	GO:0030295~protein kinase activator activity	3	0.406504	0.426947	GPRC5A, PRKAG2, MOB3B	682	41	19304	2.0711	1	1	0.993399
GOTERM_MF_DIRECT	GO:0099507~ligand-gated monoatomic ion channel activity involved in regulation of presynaptic membrane potential	2	0.271003	0.43722	GRIN2B, GRIA4	682	16	19304	3.53812	1	1	0.993399
GOTERM_MF_DIRECT	GO:0015095~magnesium ion transmembrane transporter activity	2	0.271003	0.43722	NIPAL4, SLC41A2	682	16	19304	3.53812	1	1	0.993399
GOTERM_MF_DIRECT	GO:0030414~peptidase inhibitor activity	2	0.271003	0.43722	ANOS1, CST7	682	16	19304	3.53812	1	1	0.993399
GOTERM_MF_DIRECT	GO:0022841~potassium ion leak channel activity	2	0.271003	0.43722	KCNK12, KCNK1	682	16	19304	3.53812	1	1	0.993399
GOTERM_MF_DIRECT	GO:0089720~caspase binding	2	0.271003	0.43722	CTSG, NLRC4	682	16	19304	3.53812	1	1	0.993399
GOTERM_MF_DIRECT	GO:0044548~S100 protein binding	2	0.271003	0.43722	S100P, S100A11	682	16	19304	3.53812	1	1	0.993399
GOTERM_MF_DIRECT	GO:0140326~ATPase-coupled intramembrane lipid transporter activity	2	0.271003	0.43722	ATP10B, ATP10A	682	16	19304	3.53812	1	1	0.993399
GOTERM_MF_DIRECT	GO:0004519~endonuclease activity	3	0.406504	0.439093	RNASE11, RNASE3, RNASE2	682	42	19304	2.02178	1	1	0.993399
GOTERM_MF_DIRECT	GO:0097110~scaffold protein binding	4	0.542005	0.4507	SRC, FYN, KCNA5, SHANK3	682	70	19304	1.61743	1	1	0.993399
GOTERM_MF_DIRECT	GO:0048156~tau protein binding	3	0.406504	0.451096	MAP1A, FYN, SNCA	682	43	19304	1.97477	1	1	0.993399
GOTERM_MF_DIRECT	GO:0005005~transmembrane-ephrin receptor activity	2	0.271003	0.45709	EFNB3, EPHB1	682	17	19304	3.33	1	1	0.993399
GOTERM_MF_DIRECT	GO:0045504~dynein heavy chain binding	2	0.271003	0.45709	DNAI2, TRIM58	682	17	19304	3.33	1	1	0.993399
GOTERM_MF_DIRECT	GO:0015106~bicarbonate transmembrane transporter activity	2	0.271003	0.45709	SLC26A8, SLC4A3	682	17	19304	3.33	1	1	0.993399
GOTERM_MF_DIRECT	GO:0070411~I-SMAD binding	2	0.271003	0.45709	SMAD1, FKBP1C	682	17	19304	3.33	1	1	0.993399
GOTERM_MF_DIRECT	GO:0030169~low-density lipoprotein particle binding	2	0.271003	0.45709	PCSK9, PLTP	682	17	19304	3.33	1	1	0.993399
GOTERM_MF_DIRECT	GO:0005543~phospholipid binding	6	0.813008	0.459204	PSD2, RASAL1, ARHGAP26, SYTL4, PACSIN1, SNCA	682	126	19304	1.34786	1	1	0.993399
GOTERM_MF_DIRECT	GO:0001786~phosphatidylserine binding	4	0.542005	0.45994	ANXA8L1, ANXA3, ANXA8, HAVCR1	682	71	19304	1.59465	1	1	0.993399
GOTERM_MF_DIRECT	GO:0051015~actin filament binding	10	1.35501	0.460603	MARCKSL1, ANXA8L1, ABLIM1, MYO5C, ANXA8, FLNB, ARPC5, ESPN, CORO2A, ERMN	682	237	19304	1.1943	1	1	0.993399
GOTERM_MF_DIRECT	GO:0046982~protein heterodimerization activity	15	2.03252	0.461175	ROPN1B, MEF2C, GCA, GADD45A, CYBB, PDGFA, SUPT3H, ABTB2, NR4A1, CEACAM6, BCL2, TCF4, CEACAM8, P4HB, ATF3	682	378	19304	1.12321	1	1	0.993399
GOTERM_MF_DIRECT	GO:0000978~RNA polymerase II cis-regulatory region sequence-specific DNA binding	47	6.36856	0.470637	ZNF331, ZBTB8A, HLF, ZBTB46, CEBPE, SATB2, GFI1, ETS2, BACH2, GLI2, MECOM, PRDM16, HOXA3, STAT4, HOXA2, HIVEP3, SMYD3, HOXA6, ZNF521, HOXA5, HOXA4, SMAD1, MEF2C, ZFP92, PBX3, PAX3, POU4F1, GRHL2, MYT1, SCRT1, ST18, NR4A1, MEIS1, NR4A3, NR6A1, KLF5, WT1, MAFF, ZNF30, SNAI1, TCF4, GTF2IRD1, NANOG, ZNF534, ATF3, ZNF157, ZNF750	682	1279	19304	1.04014	1	1	0.993399
GOTERM_MF_DIRECT	GO:0098632~cell-cell adhesion mediator activity	3	0.406504	0.474656	PRTG, EMB, CD200	682	45	19304	1.887	1	1	0.993399
GOTERM_MF_DIRECT	GO:0140938~histone H3 methyltransferase activity	2	0.271003	0.47626	MECOM, PRDM16	682	18	19304	3.145	1	1	0.993399
GOTERM_MF_DIRECT	GO:0016209~antioxidant activity	2	0.271003	0.47626	HP, S100A9	682	18	19304	3.145	1	1	0.993399
GOTERM_MF_DIRECT	GO:0042562~hormone binding	2	0.271003	0.47626	NPR3, CALR	682	18	19304	3.145	1	1	0.993399
GOTERM_MF_DIRECT	GO:0046914~transition metal ion binding	2	0.271003	0.47626	S100P, HRNR	682	18	19304	3.145	1	1	0.993399
GOTERM_MF_DIRECT	GO:0043395~heparan sulfate proteoglycan binding	2	0.271003	0.47626	SEMA5A, AZU1	682	18	19304	3.145	1	1	0.993399
GOTERM_MF_DIRECT	GO:0008392~arachidonic acid epoxygenase activity	2	0.271003	0.47626	CYP2S1, CYP4F3	682	18	19304	3.145	1	1	0.993399
GOTERM_MF_DIRECT	GO:0003924~GTPase activity	14	1.89702	0.481913	RAB5B, RRAS2, GNAI1, RAB33A, DNM1, DNM3, RASD2, RASD1, RAB20, GNA12, RAC2, GNB5, RAB17, RGS6	682	356	19304	1.11312	1	1	0.993399
GOTERM_MF_DIRECT	GO:0005524~ATP binding	56	7.58808	0.482036	ALK, CIITA, MAST4, FLT3, PRKAG2, ACSM6, PIK3C2B, HK3, EPHB1, ACVR1, ABCC4, ABCC1, CAMK1D, PRKCH, MUSK, DAPK1, PRKCE, STARD9, ACOT12, UBE2E2, OBSCN, PKM, ITPKA, TRIB3, PRKCQ, TNIK, PRKD1, KIFC3, ALPK2, GUCY2C, SRC, ITPR1, ATP10B, ATP10A, ATP2C2, NLRC4, ADCY6, FYN, CKB, RIMKLA, DNAH12, YES1, NUBPL, TIE1, ASNS, ATP2B1, ACVR2A, PTK2, TTLL6, EHD2, P2RX3, KIF26B, MYO5C, TTLL9, FGFR1, HSPA1A	682	1541	19304	1.0286	1	1	0.993399
GOTERM_MF_DIRECT	GO:0019900~kinase binding	5	0.677507	0.487032	BCAR3, GADD45A, SNAI1, RASGRP3, JAKMIP2	682	102	19304	1.3875	1	1	0.993399
GOTERM_MF_DIRECT	GO:0008429~phosphatidylethanolamine binding	2	0.271003	0.494753	ESYT3, PLTP	682	19	19304	2.97947	1	1	0.993399
GOTERM_MF_DIRECT	GO:0019887~protein kinase regulator activity	2	0.271003	0.494753	RAC2, PRKAG2	682	19	19304	2.97947	1	1	0.993399
GOTERM_MF_DIRECT	GO:0030276~clathrin binding	3	0.406504	0.497592	DNAJC6, DNER, NCALD	682	47	19304	1.8067	1	1	0.993399
GOTERM_MF_DIRECT	GO:0003713~transcription coactivator activity	11	1.49051	0.511744	PDLIM1, WWOX, CIITA, PKM, RBPMS, CITED4, PRDM16, PLEKHA5, TRIM15, MAML3, SUPT3H	682	277	19304	1.12402	1	1	0.993399
GOTERM_MF_DIRECT	GO:0004672~protein kinase activity	11	1.49051	0.511744	GUCY2C, ACVR1, OBSCN, PRKCH, SRC, DAPK1, PRKCE, TRIB3, PRKCQ, PRKD1, TNIK	682	277	19304	1.12402	1	1	0.993399
GOTERM_MF_DIRECT	GO:0098641~cadherin binding involved in cell-cell adhesion	2	0.271003	0.512595	PDLIM1, S100A11	682	20	19304	2.8305	1	1	0.993399
GOTERM_MF_DIRECT	GO:0015179~L-amino acid transmembrane transporter activity	2	0.271003	0.512595	SLC7A10, SLC38A4	682	20	19304	2.8305	1	1	0.993399
GOTERM_MF_DIRECT	GO:0008093~cytoskeletal anchor activity	2	0.271003	0.512595	MAP1A, ANK3	682	20	19304	2.8305	1	1	0.993399
GOTERM_MF_DIRECT	GO:0042834~peptidoglycan binding	2	0.271003	0.512595	PGLYRP1, JCHAIN	682	20	19304	2.8305	1	1	0.993399
GOTERM_MF_DIRECT	GO:0004303~estradiol 17-beta-dehydrogenase [NAD(P)+] activity	2	0.271003	0.512595	HSD17B2, AKR1C4	682	20	19304	2.8305	1	1	0.993399
GOTERM_MF_DIRECT	GO:0017075~syntaxin-1 binding	2	0.271003	0.529807	DAPK1, CPLX2	682	21	19304	2.69571	1	1	0.993399
GOTERM_MF_DIRECT	GO:0005272~sodium channel activity	2	0.271003	0.529807	SCN7A, KCNK1	682	21	19304	2.69571	1	1	0.993399
GOTERM_MF_DIRECT	GO:0003925~G protein activity	3	0.406504	0.53077	RAB5B, GNA12, RASL11A	682	50	19304	1.6983	1	1	0.993399
GOTERM_MF_DIRECT	GO:0031625~ubiquitin protein ligase binding	12	1.62602	0.539707	GPI, SMAD1, TRAF4, UBASH3B, BCL2, TRIB3, CKB, CALR, SNCAIP, FHIT, NKD2, HSPA1A	682	311	19304	1.09215	1	1	0.993399
GOTERM_MF_DIRECT	GO:0004115~3',5'-cyclic-AMP phosphodiesterase activity	2	0.271003	0.546412	PDE7B, PDE9A	682	22	19304	2.57318	1	1	0.993399
GOTERM_MF_DIRECT	GO:0031683~G-protein beta/gamma-subunit complex binding	2	0.271003	0.546412	GNA12, GNAI1	682	22	19304	2.57318	1	1	0.993399
GOTERM_MF_DIRECT	GO:0042813~Wnt receptor activity	2	0.271003	0.546412	EGF, LRP1B	682	22	19304	2.57318	1	1	0.993399
GOTERM_MF_DIRECT	GO:0005104~fibroblast growth factor receptor binding	2	0.271003	0.546412	FGF17, FGF9	682	22	19304	2.57318	1	1	0.993399
GOTERM_MF_DIRECT	GO:0005158~insulin receptor binding	2	0.271003	0.546412	SRC, SORBS1	682	22	19304	2.57318	1	1	0.993399
GOTERM_MF_DIRECT	GO:0005200~structural constituent of cytoskeleton	5	0.677507	0.553713	ANK3, ARPC5, TUBA4B, HLA-DRB1, TUBA4A	682	111	19304	1.275	1	1	0.993399
GOTERM_MF_DIRECT	GO:0004540~RNA nuclease activity	2	0.271003	0.562432	RNASE3, RNASE2	682	23	19304	2.4613	1	1	0.993399
GOTERM_MF_DIRECT	GO:0051787~misfolded protein binding	2	0.271003	0.562432	SDF2L1, HSPA1A	682	23	19304	2.4613	1	1	0.993399
GOTERM_MF_DIRECT	GO:0008046~axon guidance receptor activity	2	0.271003	0.562432	MUSK, EPHB1	682	23	19304	2.4613	1	1	0.993399
GOTERM_MF_DIRECT	GO:0030215~semaphorin receptor binding	2	0.271003	0.562432	SEMA5A, SEMA7A	682	23	19304	2.4613	1	1	0.993399
GOTERM_MF_DIRECT	GO:0005248~voltage-gated sodium channel activity	2	0.271003	0.562432	SCN7A, SCN4B	682	23	19304	2.4613	1	1	0.993399
GOTERM_MF_DIRECT	GO:0140297~DNA-binding transcription factor binding	7	0.948509	0.56894	MEF2C, CIITA, PRDM16, BCL2, CXXC5, HDAC9, GRHL2	682	172	19304	1.15195	1	1	0.993399
GOTERM_MF_DIRECT	GO:0030020~extracellular matrix structural constituent conferring tensile strength	3	0.406504	0.572629	COL17A1, COL24A1, C1QTNF7	682	54	19304	1.5725	1	1	0.993399
GOTERM_MF_DIRECT	GO:0003676~nucleic acid binding	9	1.21951	0.576339	SULT2B1, EHD2, ARPP21, RNASE11, ZMAT4, RCAN2, IGF2BP2, RNASE3, RNASE2	682	232	19304	1.09804	1	1	0.993399
GOTERM_MF_DIRECT	GO:0000981~DNA-binding transcription factor activity, RNA polymerase II-specific	48	6.50407	0.579447	ZNF331, CSRNP1, ZBTB8A, RHOXF2, HLF, TSHZ3, ZBTB46, CEBPE, SATB2, ETS2, BACH2, GLI2, MECOM, HOXA3, STAT4, HOXA2, HIVEP3, HOXA6, ZNF521, HOXA5, HOXA4, SPDEF, SMAD1, MEF2C, ZFP92, PBX3, PAX3, POU4F1, GRHL2, MYT1, SCRT1, ST18, FOXR1, NR4A1, MEIS1, NR4A3, NR6A1, KLF5, WT1, MAFF, ZNF30, AHRR, TCF4, GTF2IRD1, NANOG, ZNF534, ATF3, ZNF157	682	1359	19304	0.999735	1	1	0.993399
GOTERM_MF_DIRECT	GO:0003714~transcription corepressor activity	8	1.08401	0.588365	SFMBT2, DNMT3B, TRIB3, CRYM, HDAC9, CBFA2T3, ELANE, HSPA1A	682	205	19304	1.10458	1	1	0.993399
GOTERM_MF_DIRECT	GO:0031267~small GTPase binding	11	1.49051	0.591832	TAMALIN, DOCK3, PRKCH, DAAM2, ITPKA, RGPD6, SH3BP4, DOCK1, SYTL4, RNF152, RASGRP3	682	294	19304	1.05903	1	1	0.993399
GOTERM_MF_DIRECT	GO:0042910~xenobiotic transmembrane transporter activity	2	0.271003	0.592797	ABCC4, ABCC1	682	25	19304	2.2644	1	1	0.993399
GOTERM_MF_DIRECT	GO:0120020~cholesterol transfer activity	2	0.271003	0.592797	TSPO, PLTP	682	25	19304	2.2644	1	1	0.993399
GOTERM_MF_DIRECT	GO:0050431~transforming growth factor beta binding	2	0.271003	0.592797	ACVR1, CD109	682	25	19304	2.2644	1	1	0.993399
GOTERM_MF_DIRECT	GO:0016301~kinase activity	8	1.08401	0.593516	ALK, PKM, DAPK1, PRKAG2, AKAP6, CKB, PRKD1, PACSIN1	682	206	19304	1.09922	1	1	0.993399
GOTERM_MF_DIRECT	GO:0034987~immunoglobulin receptor binding	2	0.271003	0.60718	ADAM28, JCHAIN	682	26	19304	2.17731	1	1	0.993399
GOTERM_MF_DIRECT	GO:0048027~mRNA 5'-UTR binding	2	0.271003	0.60718	IGF2BP3, IGF2BP2	682	26	19304	2.17731	1	1	0.993399
GOTERM_MF_DIRECT	GO:0005537~D-mannose binding	2	0.271003	0.60718	ACR, CD207	682	26	19304	2.17731	1	1	0.993399
GOTERM_MF_DIRECT	GO:0051018~protein kinase A binding	2	0.271003	0.60718	AKAP12, AKAP6	682	26	19304	2.17731	1	1	0.993399
GOTERM_MF_DIRECT	GO:0005539~glycosaminoglycan binding	2	0.271003	0.60718	VIT, SPOCK3	682	26	19304	2.17731	1	1	0.993399
GOTERM_MF_DIRECT	GO:0030170~pyridoxal phosphate binding	3	0.406504	0.611705	SDS, PSAT1, MTARC1	682	58	19304	1.46405	1	1	0.993399
GOTERM_MF_DIRECT	GO:0033038~bitter taste receptor activity	2	0.271003	0.621057	TAS2R13, TAS2R46	682	27	19304	2.09667	1	1	0.993399
GOTERM_MF_DIRECT	GO:0035255~ionotropic glutamate receptor binding	2	0.271003	0.634444	IGSF11, SHANK3	682	28	19304	2.02178	1	1	0.993399
GOTERM_MF_DIRECT	GO:0097602~cullin family protein binding	2	0.271003	0.634444	KCTD19, KLHL13	682	28	19304	2.02178	1	1	0.993399
GOTERM_MF_DIRECT	GO:0004177~aminopeptidase activity	2	0.271003	0.647359	DPP4, DPP6	682	29	19304	1.95207	1	1	0.993399
GOTERM_MF_DIRECT	GO:0051721~protein phosphatase 2A binding	2	0.271003	0.659818	GNA12, BCL2	682	30	19304	1.887	1	1	0.993399
GOTERM_MF_DIRECT	GO:0005164~tumor necrosis factor receptor binding	2	0.271003	0.683433	EDA, TRAF4	682	32	19304	1.76906	1	1	0.993399
GOTERM_MF_DIRECT	GO:0070273~phosphatidylinositol-4-phosphate binding	2	0.271003	0.683433	OBSCN, PLEKHA5	682	32	19304	1.76906	1	1	0.993399
GOTERM_MF_DIRECT	GO:0005267~potassium channel activity	2	0.271003	0.694619	TMEM38A, KCNK1	682	33	19304	1.71545	1	1	0.993399
GOTERM_MF_DIRECT	GO:0008327~methyl-CpG binding	2	0.271003	0.694619	CXXC5, DPEP3	682	33	19304	1.71545	1	1	0.993399
GOTERM_MF_DIRECT	GO:0050840~extracellular matrix binding	2	0.271003	0.694619	SPOCK3, SSC5D	682	33	19304	1.71545	1	1	0.993399
GOTERM_MF_DIRECT	GO:0046872~metal ion binding	96	13.0081	0.695297	ZNF331, RTP5, GUCY1B1, ITGAM, BNC2, GFI1, SLC40A1, ACSM6, MT1X, HR, DOC2B, MPO, SH3RF1, GLI2, MECOM, DNMT3B, ITGB8, CPNE3, RNF152, ZNF521, VAV3, ACVR1, PRKCH, MUSK, PRKCE, HBE1, ZFP92, CYBB, DNTT, SYTL4, TUBA4B, CBFA2T3, MOB3B, MUC5AC, TUBA4A, VAV2, ZC2HC1B, OBSCN, TRAF4, MT1F, PRKCQ, PRKD1, MOCS1, PDE9A, ZNF157, ZNF750, FREM3, ZBTB8A, TSHZ3, ZBTB46, ATP23, ATP10B, ADAM20, LPO, ATP10A, RASAL1, AS…	682	2812	19304	0.966315	1	1	0.993399
GOTERM_MF_DIRECT	GO:0019901~protein kinase binding	17	2.30352	0.696927	SMAD1, PRKAG2, KCNA5, TUBA4A, ADCY6, PTK2, DNM1, MAG, NR4A3, TRAF4, BLNK, RAC2, TRIM58, TRIB3, CD24, SLC12A7, FAM83B	682	502	19304	0.958535	1	1	0.993399
GOTERM_MF_DIRECT	GO:0000149~SNARE binding	3	0.406504	0.697309	EXOC3L4, CPLX2, SNCA	682	68	19304	1.24875	1	1	0.993399
GOTERM_MF_DIRECT	GO:1990841~promoter-specific chromatin binding	3	0.406504	0.697309	GADD45A, GLI2, ZNF750	682	68	19304	1.24875	1	1	0.993399
GOTERM_MF_DIRECT	GO:0004674~protein serine/threonine kinase activity	13	1.76152	0.699801	ACVR1, CIITA, PRKCH, MAST4, DAPK1, PRKCE, ACVR2A, OBSCN, PRKCQ, CPNE3, TNIK, PRKD1, ALPK2	682	382	19304	0.963259	1	1	0.993399
GOTERM_MF_DIRECT	GO:0022857~transmembrane transporter activity	4	0.542005	0.70278	SLC22A12, SV2B, SLC4A3, SLC22A31	682	102	19304	1.11	1	1	0.993399
GOTERM_MF_DIRECT	GO:0016746~acyltransferase activity	2	0.271003	0.70541	CIITA, GLYAT	682	34	19304	1.665	1	1	0.993399
GOTERM_MF_DIRECT	GO:0043495~protein-membrane adaptor activity	2	0.271003	0.70541	MAST4, AKAP6	682	34	19304	1.665	1	1	0.993399
GOTERM_MF_DIRECT	GO:0030971~receptor tyrosine kinase binding	3	0.406504	0.719744	ANGPT1, NRG3, CPNE3	682	71	19304	1.19599	1	1	0.993399
GOTERM_MF_DIRECT	GO:0004930~G protein-coupled receptor activity	24	3.25203	0.72308	OR1B1, GPR15, CALCRL, GPR34, OR1L6, GPR52, OR51M1, TAS2R13, TAS2R46, LPAR3, ADGRA3, FPR2, OR2T33, MAS1, GPR173, HTR7, GPR142, OR2AJ1, GPRC5A, OR2W3, ADGRG5, GPR183, OR51B5, GPR146	682	722	19304	0.940886	1	1	0.993399
GOTERM_MF_DIRECT	GO:0008289~lipid binding	6	0.813008	0.725289	STARD9, BLNK, ACOT12, LPAR3, BPI, SNCA	682	171	19304	0.993157	1	1	0.993399
GOTERM_MF_DIRECT	GO:0003674~molecular_function	24	3.25203	0.725458	CSRNP1, ARPP21, WFDC1, TMEM51, TSPEAR, METRNL, TUBA4B, GGTA1, XG, ABTB2, TAF7L, MN1, PCNX2, SIPA1L1, PRB1, BCL7A, TMSB15B, PSG6, PRB2, TFF3, TRIM58, SAMD12, FILIP1L, MAMLD1	682	723	19304	0.939585	1	1	0.993399
GOTERM_MF_DIRECT	GO:0000287~magnesium ion binding	8	1.08401	0.74282	PKM, MAST4, ATP10B, ATP10A, S100P, NLRC4, GNAI1, SNCA	682	239	19304	0.947447	1	1	0.993399
GOTERM_MF_DIRECT	GO:0097718~disordered domain specific binding	2	0.271003	0.744901	FYN, HSPA1A	682	38	19304	1.48974	1	1	0.993399
GOTERM_MF_DIRECT	GO:0042626~ATPase-coupled transmembrane transporter activity	2	0.271003	0.744901	ABCC4, ABCC1	682	38	19304	1.48974	1	1	0.993399
GOTERM_MF_DIRECT	GO:0140359~ABC-type transporter activity	2	0.271003	0.744901	ABCC4, ABCC1	682	38	19304	1.48974	1	1	0.993399
GOTERM_MF_DIRECT	GO:0008013~beta-catenin binding	4	0.542005	0.749928	CDH24, DCHS1, TCF4, RNF220	682	110	19304	1.02927	1	1	0.993399
GOTERM_MF_DIRECT	GO:0016740~transferase activity	4	0.542005	0.749928	PRKCH, TRAF4, DNTT, PRKD1	682	110	19304	1.02927	1	1	0.993399
GOTERM_MF_DIRECT	GO:0045505~dynein intermediate chain binding	2	0.271003	0.753918	DNAH12, TRIM58	682	39	19304	1.45154	1	1	0.993399
GOTERM_MF_DIRECT	GO:0005109~frizzled binding	2	0.271003	0.753918	SFRP1, WNT9A	682	39	19304	1.45154	1	1	0.993399
GOTERM_MF_DIRECT	GO:0008138~protein tyrosine/serine/threonine phosphatase activity	2	0.271003	0.762616	DUSP5, CDC14B	682	40	19304	1.41525	1	1	0.993399
GOTERM_MF_DIRECT	GO:0004857~enzyme inhibitor activity	2	0.271003	0.771008	PPP1R16B, PDE6H	682	41	19304	1.38073	1	1	0.993399
GOTERM_MF_DIRECT	GO:1904315~transmitter-gated monoatomic ion channel activity involved in regulation of postsynaptic membrane potential	2	0.271003	0.779104	GRIN2B, GRIA4	682	42	19304	1.34786	1	1	0.993399
GOTERM_MF_DIRECT	GO:0016791~phosphatase activity	2	0.271003	0.786913	DUSP5, PTPRM	682	43	19304	1.31651	1	1	0.993399
GOTERM_MF_DIRECT	GO:0050661~NADP binding	2	0.271003	0.786913	G6PD, CRYM	682	43	19304	1.31651	1	1	0.993399
GOTERM_MF_DIRECT	GO:0030674~protein-macromolecule adaptor activity	5	0.677507	0.792624	FLRT1, ANK3, ARHGAP26, HCST, JCHAIN	682	153	19304	0.925	1	1	0.993399
GOTERM_MF_DIRECT	GO:0015459~potassium channel regulator activity	2	0.271003	0.794447	DPP10, DPP6	682	44	19304	1.28659	1	1	0.993399
GOTERM_MF_DIRECT	GO:0042056~chemoattractant activity	2	0.271003	0.794447	HGF, DEFB108B	682	44	19304	1.28659	1	1	0.993399
GOTERM_MF_DIRECT	GO:0005198~structural molecule activity	6	0.813008	0.808101	MAP1A, LAMA3, CLTCL1, PLP1, OLFM4, CLDN2	682	191	19304	0.889162	1	1	0.993399
GOTERM_MF_DIRECT	GO:0031490~chromatin DNA binding	3	0.406504	0.811809	HR, GRHL2, GLI2	682	86	19304	0.987383	1	1	0.993399
GOTERM_MF_DIRECT	GO:0016491~oxidoreductase activity	4	0.542005	0.813546	WWOX, SCD, SCD5, SNCA	682	123	19304	0.920487	1	1	0.993399
GOTERM_MF_DIRECT	GO:0005249~voltage-gated potassium channel activity	2	0.271003	0.81549	KCNH4, KCNH8	682	47	19304	1.20447	1	1	0.993399
GOTERM_MF_DIRECT	GO:0051539~4 iron, 4 sulfur cluster binding	2	0.271003	0.81549	NUBPL, MOCS1	682	47	19304	1.20447	1	1	0.993399
GOTERM_MF_DIRECT	GO:0017018~myosin phosphatase activity	3	0.406504	0.816867	DUSP5, PPM1J, CDC14B	682	87	19304	0.976034	1	1	0.993399
GOTERM_MF_DIRECT	GO:0019894~kinesin binding	2	0.271003	0.834382	DCDC2, SNCA	682	50	19304	1.1322	1	1	0.993399
GOTERM_MF_DIRECT	GO:0032266~phosphatidylinositol-3-phosphate binding	2	0.271003	0.834382	OBSCN, PLEKHA5	682	50	19304	1.1322	1	1	0.993399
GOTERM_MF_DIRECT	GO:0106310~protein serine kinase activity	11	1.49051	0.835537	CIITA, OBSCN, CAMK1D, PRKCH, MAST4, DAPK1, PRKCE, PRKCQ, PRKD1, TNIK, ALPK2	682	366	19304	0.850696	1	1	0.993399
GOTERM_MF_DIRECT	GO:0042826~histone deacetylase binding	4	0.542005	0.849093	MEF2C, SATB2, HDAC9, HSPA1A	682	132	19304	0.857727	1	1	0.993399
GOTERM_MF_DIRECT	GO:0030544~Hsp70 protein binding	2	0.271003	0.856601	PGLYRP1, SNCA	682	54	19304	1.04833	1	1	0.993399
GOTERM_MF_DIRECT	GO:0019905~syntaxin binding	2	0.271003	0.866568	DOC2B, CPLX2	682	56	19304	1.01089	1	1	0.993399
GOTERM_MF_DIRECT	GO:0044183~protein folding chaperone	2	0.271003	0.871288	CALR, HSPA1A	682	57	19304	0.993157	1	1	0.993399
GOTERM_MF_DIRECT	GO:0004497~monooxygenase activity	2	0.271003	0.880236	CYP2S1, CYP4F3	682	59	19304	0.959491	1	1	0.993399
GOTERM_MF_DIRECT	GO:0070888~E-box binding	2	0.271003	0.884474	SNAI1, TCF4	682	60	19304	0.9435	1	1	0.993399
GOTERM_MF_DIRECT	GO:0009055~electron transfer activity	2	0.271003	0.888562	CYBB, AKR1C4	682	61	19304	0.928032	1	1	0.993399
GOTERM_MF_DIRECT	GO:1990756~ubiquitin-like ligase-substrate adaptor activity	2	0.271003	0.888562	SPSB1, KLHL25	682	61	19304	0.928032	1	1	0.993399
GOTERM_MF_DIRECT	GO:0035091~phosphatidylinositol binding	3	0.406504	0.889216	ITPR1, ESYT3, PIK3C2B	682	105	19304	0.808714	1	1	0.993399
GOTERM_MF_DIRECT	GO:0003690~double-stranded DNA binding	3	0.406504	0.892333	HLF, MNDA, AFF3	682	106	19304	0.801084	1	1	0.993399
GOTERM_MF_DIRECT	GO:0061629~RNA polymerase II-specific DNA-binding transcription factor binding	5	0.677507	0.892959	MEF2C, ZBTB8A, POU4F1, HDAC9, ETS2	682	184	19304	0.769157	1	1	0.993399
GOTERM_MF_DIRECT	GO:0051087~protein-folding chaperone binding	3	0.406504	0.895368	SDF2L1, GNB5, CALR	682	107	19304	0.793598	1	1	0.993399
GOTERM_MF_DIRECT	GO:0000977~RNA polymerase II transcription regulatory region sequence-specific DNA binding	10	1.35501	0.895718	MEF2C, RHOXF2, MECOM, SATB2, SNAI1, PAX3, NANOG, AEBP1, ATF3, SCRT1	682	362	19304	0.781906	1	1	0.993399
GOTERM_MF_DIRECT	GO:0005179~hormone activity	3	0.406504	0.898323	SCT, METRNL, KNG1	682	108	19304	0.78625	1	1	0.993399
GOTERM_MF_DIRECT	GO:0008047~enzyme activator activity	2	0.271003	0.90352	PRKCE, ALOX5AP	682	65	19304	0.870923	1	1	0.993399
GOTERM_MF_DIRECT	GO:0003697~single-stranded DNA binding	3	0.406504	0.909383	SSBP2, POU4F1, JCHAIN	682	112	19304	0.758169	1	1	0.993399
GOTERM_MF_DIRECT	GO:0003729~mRNA binding	7	0.948509	0.916326	RBFOX1, KHDRBS2, PKM, RBPMS, SLPI, CALR, MSI2	682	269	19304	0.736561	1	1	0.993399
GOTERM_MF_DIRECT	GO:0030145~manganese ion binding	2	0.271003	0.91943	MGAT5B, MPPED2	682	70	19304	0.808714	1	1	0.993399
GOTERM_MF_DIRECT	GO:0005254~chloride channel activity	2	0.271003	0.91943	OCA2, SLC26A8	682	70	19304	0.808714	1	1	0.993399
GOTERM_MF_DIRECT	GO:0005262~calcium channel activity	2	0.271003	0.93272	ITPR1, GRIN1	682	75	19304	0.7548	1	1	0.993399
GOTERM_MF_DIRECT	GO:0019904~protein domain specific binding	5	0.677507	0.950421	EHD2, IL1B, ITPR1, ZNF521, ETS2	682	217	19304	0.652189	1	1	0.993399
GOTERM_MF_DIRECT	GO:0051082~unfolded protein binding	3	0.406504	0.951137	SSUH2, CALR, HSPA1A	682	133	19304	0.638458	1	1	0.993399
GOTERM_MF_DIRECT	GO:0046983~protein dimerization activity	4	0.542005	0.960927	MEF2C, GRM7, AHRR, TCF4	682	185	19304	0.612	1	1	0.993399
GOTERM_MF_DIRECT	GO:0004842~ubiquitin-protein transferase activity	5	0.677507	0.961165	ZNRF1, UBE2E2, KLHL13, RNF152, RNF220	682	227	19304	0.623458	1	1	0.993399
GOTERM_MF_DIRECT	GO:0016787~hydrolase activity	5	0.677507	0.969717	EHD2, IL1RAPL1, FHIT, TUBA4B, TUBA4A	682	237	19304	0.597152	1	1	0.993399
GOTERM_MF_DIRECT	GO:0003677~DNA binding	30	4.06504	0.982415	ZNF331, RHOXF2, HLF, TSHZ3, MLLT3, ETS2, MECOM, ZMAT4, PRDM16, DNMT3B, JARID2, HOXA5, MEF2C, PBX3, PAX3, DNTT, MYT1, ACR, NR4A1, MEIS1, NR4A3, NR6A1, ZNF618, SLPI, TCF4, GTF2IRD1, NANOG, CALR, LTF, DPEP3	682	1157	19304	0.733924	1	1	0.993399
GOTERM_MF_DIRECT	GO:0000166~nucleotide binding	2	0.271003	0.984683	ATP10B, FHIT	682	116	19304	0.488017	1	1	0.993399
GOTERM_MF_DIRECT	GO:0003712~transcription coregulator activity	2	0.271003	0.988937	PRDM16, HR	682	125	19304	0.45288	1	1	0.993399
GOTERM_MF_DIRECT	GO:0004888~transmembrane signaling receptor activity	3	0.406504	0.989155	DNER, CHRNA6, FCER1A	682	182	19304	0.466566	1	1	0.993399
GOTERM_MF_DIRECT	GO:0003682~chromatin binding	11	1.49051	0.98984	MEIS1, NPM2, TSHZ3, AUTS2, SFMBT2, SATB2, DNMT3B, JARID2, MLLT3, MPO, POU4F1	682	523	19304	0.595325	1	1	0.993399
GOTERM_MF_DIRECT	GO:0042393~histone binding	4	0.542005	0.99001	NPM2, SFMBT2, MLLT3, SNCA	682	234	19304	0.483846	1	1	0.993399
GOTERM_MF_DIRECT	GO:0061630~ubiquitin protein ligase activity	7	0.948509	0.99226	SH3RF3, ZNRF1, TRIM58, TRIM15, RNF152, SH3RF1, RNF220	682	376	19304	0.526955	1	1	0.993399
GOTERM_MF_DIRECT	GO:0003730~mRNA 3'-UTR binding	4	0.542005	0.993333	BOLL, RBPMS, IGF2BP3, IGF2BP2	682	248	19304	0.456532	1	1	0.993399
GOTERM_MF_DIRECT	GO:0016887~ATP hydrolysis activity	8	1.08401	0.994762	ABCC4, DNAH12, ABCC1, ATP10B, ATP10A, ATP2B1, ATP2C2, HSPA1A	682	434	19304	0.521751	1	1	0.994762
GOTERM_MF_DIRECT	GO:0004984~olfactory receptor activity	7	0.948509	0.998894	OR1B1, OR2AJ1, OR2W3, OR1L6, OR51M1, OR51B5, OR2T33	682	453	19304	0.437384	1	1	0.998894
GOTERM_MF_DIRECT	GO:0003723~RNA binding	21	2.84553	1	RBFOX1, NPM2, CAVIN1, RBPMS, APOBEC3H, PCSK9, MSI2, CKAP4, DNM1, PKM, CMSS1, WT1, TMSB4X, FLNB, IGF2BP3, CPNE3, P4HB, CALR, IGF2BP2, HSPA1A, APOBEC3B	682	1455	19304	0.408526	1	1	1
GOTERM_MF_DIRECT	GO:0003823~antigen binding	1	0.135501	1	JCHAIN	682	152	19304	0.186217	1	1	1
GOTERM_MF_DIRECT	GO:0061799~cyclic pyranopterin monophosphate synthase activity	1	0.135501	1	MOCS1	682	1	19304	28.305	1	1	1
GOTERM_MF_DIRECT	GO:0001162~RNA polymerase II intronic transcription regulatory region sequence-specific DNA binding	1	0.135501	1	SMYD3	682	8	19304	3.53812	1	1	1
GOTERM_MF_DIRECT	GO:0051393~alpha-actinin binding	1	0.135501	1	KCNA5	682	16	19304	1.76906	1	1	1
GOTERM_MF_DIRECT	GO:0030546~signaling receptor activator activity	1	0.135501	1	PRKCE	682	3	19304	9.435	1	1	1
GOTERM_MF_DIRECT	GO:0004345~glucose-6-phosphate dehydrogenase activity	1	0.135501	1	G6PD	682	2	19304	14.1525	1	1	1
GOTERM_MF_DIRECT	GO:0051371~muscle alpha-actinin binding	1	0.135501	1	PDLIM1	682	18	19304	1.5725	1	1	1
GOTERM_MF_DIRECT	GO:0008373~sialyltransferase activity	1	0.135501	1	ST8SIA6	682	17	19304	1.665	1	1	1
GOTERM_MF_DIRECT	GO:0043015~gamma-tubulin binding	1	0.135501	1	CEP70	682	41	19304	0.690365	1	1	1
GOTERM_MF_DIRECT	GO:0031127~alpha-(1,2)-fucosyltransferase activity	1	0.135501	1	FUT2	682	2	19304	14.1525	1	1	1
GOTERM_MF_DIRECT	GO:0031434~mitogen-activated protein kinase kinase binding	1	0.135501	1	TRIB3	682	12	19304	2.35875	1	1	1
GOTERM_MF_DIRECT	GO:0035373~chondroitin sulfate proteoglycan binding	1	0.135501	1	SEMA5A	682	2	19304	14.1525	1	1	1
GOTERM_MF_DIRECT	GO:0043546~molybdopterin cofactor binding	1	0.135501	1	MTARC1	682	8	19304	3.53812	1	1	1
GOTERM_MF_DIRECT	GO:0034040~ATPase-coupled lipid transmembrane transporter activity	1	0.135501	1	ABCC1	682	2	19304	14.1525	1	1	1
GOTERM_MF_DIRECT	GO:0070905~serine binding	1	0.135501	1	GRM7	682	4	19304	7.07625	1	1	1
GOTERM_MF_DIRECT	GO:0001595~angiotensin receptor activity	1	0.135501	1	MAS1	682	2	19304	14.1525	1	1	1
GOTERM_MF_DIRECT	GO:0004602~glutathione peroxidase activity	1	0.135501	1	ALOX5AP	682	23	19304	1.23065	1	1	1
GOTERM_MF_DIRECT	GO:0008020~G protein-coupled photoreceptor activity	1	0.135501	1	GPR52	682	20	19304	1.41525	1	1	1
GOTERM_MF_DIRECT	GO:0052871~alpha-tocopherol omega-hydroxylase activity	1	0.135501	1	CYP4F3	682	2	19304	14.1525	1	1	1
GOTERM_MF_DIRECT	GO:0005112~Notch binding	1	0.135501	1	DNER	682	33	19304	0.857727	1	1	1
GOTERM_MF_DIRECT	GO:0016316~phosphatidylinositol-3,4-bisphosphate 4-phosphatase activity	1	0.135501	1	INPP4B	682	2	19304	14.1525	1	1	1
GOTERM_MF_DIRECT	GO:0008527~taste receptor activity	1	0.135501	1	TAS2R13	682	16	19304	1.76906	1	1	1
GOTERM_MF_DIRECT	GO:1904121~phosphatidylethanolamine transfer activity	1	0.135501	1	PLTP	682	4	19304	7.07625	1	1	1
GOTERM_MF_DIRECT	GO:0035276~ethanol binding	1	0.135501	1	PRKCE	682	2	19304	14.1525	1	1	1
GOTERM_MF_DIRECT	GO:0008142~oxysterol binding	1	0.135501	1	GPR183	682	16	19304	1.76906	1	1	1
GOTERM_MF_DIRECT	GO:0031996~thioesterase binding	1	0.135501	1	TRAF4	682	10	19304	2.8305	1	1	1
GOTERM_MF_DIRECT	GO:0005132~type I interferon receptor binding	1	0.135501	1	IFNK	682	17	19304	1.665	1	1	1
GOTERM_MF_DIRECT	GO:0140999~histone H3K4 trimethyltransferase activity	1	0.135501	1	SMYD3	682	11	19304	2.57318	1	1	1
GOTERM_MF_DIRECT	GO:0042609~CD4 receptor binding	1	0.135501	1	HLA-DRB1	682	8	19304	3.53812	1	1	1
GOTERM_MF_DIRECT	GO:0032036~myosin heavy chain binding	1	0.135501	1	NKD2	682	9	19304	3.145	1	1	1
GOTERM_MF_DIRECT	GO:0009008~DNA-methyltransferase activity	1	0.135501	1	DNMT3B	682	3	19304	9.435	1	1	1
GOTERM_MF_DIRECT	GO:0038106~choriogonadotropin hormone binding	1	0.135501	1	LHCGR	682	1	19304	28.305	1	1	1
GOTERM_MF_DIRECT	GO:0005220~inositol 1,4,5-trisphosphate-gated calcium channel activity	1	0.135501	1	ITPR1	682	3	19304	9.435	1	1	1
GOTERM_MF_DIRECT	GO:0004022~alcohol dehydrogenase (NAD+) activity	1	0.135501	1	ADH1C	682	10	19304	2.8305	1	1	1
GOTERM_MF_DIRECT	GO:0047044~androstan-3-alpha,17-beta-diol dehydrogenase activity	1	0.135501	1	AKR1C4	682	9	19304	3.145	1	1	1
GOTERM_MF_DIRECT	GO:0030955~potassium ion binding	1	0.135501	1	PKM	682	14	19304	2.02178	1	1	1
GOTERM_MF_DIRECT	GO:0004794~threonine deaminase activity	1	0.135501	1	SDS	682	2	19304	14.1525	1	1	1
GOTERM_MF_DIRECT	GO:0046961~proton-transporting ATPase activity, rotational mechanism	1	0.135501	1	ATP6V0A4	682	25	19304	1.1322	1	1	1
GOTERM_MF_DIRECT	GO:0098695~inositol 1,4,5-trisphosphate receptor activity involved in regulation of postsynaptic cytosolic calcium levels	1	0.135501	1	ITPR1	682	1	19304	28.305	1	1	1
GOTERM_MF_DIRECT	GO:0047352~adenylylsulfate-ammonia adenylyltransferase activity	1	0.135501	1	FHIT	682	1	19304	28.305	1	1	1
GOTERM_MF_DIRECT	GO:0019706~protein-cysteine S-palmitoyltransferase activity	1	0.135501	1	ZDHHC19	682	26	19304	1.08865	1	1	1
GOTERM_MF_DIRECT	GO:0005068~transmembrane receptor protein tyrosine kinase adaptor activity	1	0.135501	1	BLNK	682	17	19304	1.665	1	1	1
GOTERM_MF_DIRECT	GO:0030412~formimidoyltetrahydrofolate cyclodeaminase activity	1	0.135501	1	FTCD	682	1	19304	28.305	1	1	1
GOTERM_MF_DIRECT	GO:0043530~adenosine 5'-monophosphoramidase activity	1	0.135501	1	FHIT	682	4	19304	7.07625	1	1	1
GOTERM_MF_DIRECT	GO:0043130~ubiquitin binding	1	0.135501	1	JARID2	682	102	19304	0.2775	1	1	1
GOTERM_MF_DIRECT	GO:0001221~transcription coregulator binding	1	0.135501	1	ZNF618	682	38	19304	0.744868	1	1	1
GOTERM_MF_DIRECT	GO:0036458~hepatocyte growth factor binding	1	0.135501	1	SRPX2	682	1	19304	28.305	1	1	1
GOTERM_MF_DIRECT	GO:0019002~GMP binding	1	0.135501	1	MPPED2	682	2	19304	14.1525	1	1	1
GOTERM_MF_DIRECT	GO:0086090~voltage-gated potassium channel activity involved in SA node cell action potential repolarization	1	0.135501	1	KCNA5	682	1	19304	28.305	1	1	1
GOTERM_MF_DIRECT	GO:0030492~hemoglobin binding	1	0.135501	1	HP	682	5	19304	5.661	1	1	1
GOTERM_MF_DIRECT	GO:0070324~thyroid hormone binding	1	0.135501	1	CRYM	682	6	19304	4.7175	1	1	1
GOTERM_MF_DIRECT	GO:0071723~lipopeptide binding	1	0.135501	1	CD1E	682	9	19304	3.145	1	1	1
GOTERM_MF_DIRECT	GO:0003707~nuclear steroid receptor activity	1	0.135501	1	NR4A3	682	23	19304	1.23065	1	1	1
GOTERM_MF_DIRECT	GO:0004465~lipoprotein lipase activity	1	0.135501	1	LIPM	682	10	19304	2.8305	1	1	1
GOTERM_MF_DIRECT	GO:0070097~delta-catenin binding	1	0.135501	1	CDH24	682	10	19304	2.8305	1	1	1
GOTERM_MF_DIRECT	GO:0070577~lysine-acetylated histone binding	1	0.135501	1	MLLT3	682	27	19304	1.04833	1	1	1
GOTERM_MF_DIRECT	GO:0017161~inositol-1,3,4-trisphosphate 4-phosphatase activity	1	0.135501	1	INPP4B	682	2	19304	14.1525	1	1	1
GOTERM_MF_DIRECT	GO:0031593~polyubiquitin modification-dependent protein binding	1	0.135501	1	UBQLN3	682	39	19304	0.725769	1	1	1
GOTERM_MF_DIRECT	GO:0005168~neurotrophin TRKA receptor binding	1	0.135501	1	EFNA5	682	6	19304	4.7175	1	1	1
GOTERM_MF_DIRECT	GO:0004970~glutamate-gated receptor activity	1	0.135501	1	GRIA4	682	8	19304	3.53812	1	1	1
[truncated: 507 more rows]
